# Supplementary material
Source: PubMed Central journal article supplement (PMC3763978)
Supplement: supp_jc.2013-1923_JC-13-1923_2Tabs.pdf [file supp_jc.2013-1923_JC-13-1923_2Tabs.pdf]

Supplemental Table 1a  
eMSC vs. eEP

| Transcripts Cluster Id | Genesymbol | eMSC vs. eEP (Fold change) | Regulation | Gene description                                              |
|------------------------|------------|----------------------------|------------|---------------------------------------------------------------|
| 7921916                | RGS5       | 66.071304                  | up         | regulator of G-protein signaling 5                            |
| 7934906                | ACTA2      | 39.267563                  | up         | actin, alpha 2, smooth muscle, aorta                          |
| 8170648                | BGN        | 31.946854                  | up         | biglycan                                                      |
| 8113039                | MEF2C      | 30.892147                  | up         | myocyte enhancer factor 2C                                    |
| 8059905                | COL6A3     | 30.404747                  | up         | collagen, type VI, alpha 3                                    |
| 7960865                | SLC2A3     | 28.149218                  | up         | solute carrier family 2 (facilitated glucose transporter), me |
| 7961710                | ABCC9      | 28.10258                   | up         | ATP-binding cassette, sub-family C (CFTR/MRP), member 9       |
| 7960947                | A2M        | 27.202726                  | up         | alpha-2-macroglobulin                                         |
| 8058765                | FN1        | 26.163923                  | up         | fibronectin 1                                                 |
| 8115327                | SPARC      | 25.535135                  | up         | secreted protein, acidic, cysteine-rich (osteonectin)         |
| 8146863                | SULF1      | 24.181532                  | up         | sulfatase 1                                                   |
| 8115099                | PDGFRB     | 22.287388                  | up         | platelet-derived growth factor receptor, beta polypeptide     |
| 8115543                | EBF1       | 22.018791                  | up         | early B-cell factor 1                                         |
| 7949588                | CD248      | 21.835312                  | up         |                                                               |
| 8016094                | GJC1       | 21.276186                  | up         | gap junction protein, gamma 1, 45kDa                          |
| 7921882                | OLFML2B    | 20.67696                   | up         | olfactomedin-like 2B                                          |
| 8097692                | EDNRA      | 20.080338                  | up         | endothelin receptor type A                                    |
| 8102792                | PCDH18     | 19.01472                   | up         | protocadherin 18                                              |
| 7925320                | NID1       | 18.592417                  | up         | nidogen 1                                                     |
| 8144917                | LPL        | 18.460636                  | up         | lipoprotein lipase                                            |
| 8056363                | SLC38A11   | 18.415771                  | up         | solute carrier family 38, member 11                           |
| 8080511                | CACNA1D    | 18.170588                  | up         | calcium channel, voltage-dependent, L type, alpha 1D sub      |
| 8055624                | ZEB2       | 17.974997                  | up         | zinc finger E-box binding homeobox 2                          |
| 7965410                | DCN        | 17.576475                  | up         | decorin                                                       |
| 8007701                | HIGD1B     | 17.1339                    | up         | HIG1 domain family, member 1B                                 |
| 8128991                | LAMA4      | 16.547977                  | up         | laminin, alpha 4                                              |
| 7952268                | THY1       | 16.190092                  | up         | Thy-1 cell surface antigen                                    |
| 8149071                | ANGPT2     | 16.139389                  | up         | angiopoietin 2                                                |
| 8058857                | IGFBP5     | 15.331609                  | up         | insulin-like growth factor binding protein 5                  |
| 7965403                | LUM        | 15.257358                  | up         | lumican                                                       |
| 7927606                | PRKG1      | 15.20931                   | up         | protein kinase, cGMP-dependent, type I                        |
| 8098204                | CPE        | 14.786374                  | up         | carboxypeptidase E                                            |

Supplemental Table 1a  
eMSC vs. eEP

|         |         |            |    |                                                             |
|---------|---------|------------|----|-------------------------------------------------------------|
| 7936439 | AFAP1L2 | 14.7761755 | up | actin filament associated protein 1-like 2                  |
| 7909789 | TGFB2   | 14.546682  | up | transforming growth factor, beta 2                          |
| 8097973 | GUCY1B3 | 14.494528  | up | guanylate cyclase 1, soluble, beta 3                        |
| 8097080 | SYNPO2  | 14.358166  | up | synaptopodin 2                                              |
| 7951437 | GUCY1A2 | 14.289068  | up | guanylate cyclase 1, soluble, alpha 2                       |
| 8091511 | P2RY14  | 13.797058  | up | purinergic receptor P2Y, G-protein coupled, 14              |
| 7979133 | NID2    | 13.791126  | up | nidogen 2 (osteonidogen)                                    |
| 8123920 | ELOVL2  | 13.498229  | up | elongation of very long chain fatty acids (FEN1/Elo2, SUR4  |
| 7971150 | LHFP    | 13.302231  | up | lipoma HMGIC fusion partner                                 |
| 8126798 | GPR116  | 13.052821  | up | G protein-coupled receptor 116                              |
| 8135594 | CAV1    | 13.007801  | up | caveolin 1, caveolae protein, 22kDa                         |
| 7974902 | RHOJ    | 12.88642   | up | ras homolog gene family, member J                           |
| 7961514 | MGP     | 12.814338  | up | matrix Gla protein                                          |
| 8062312 | MYL9    | 12.434102  | up | myosin, light chain 9, regulatory                           |
| 7961540 | RERG    | 12.202048  | up | RAS-like, estrogen-regulated, growth inhibitor              |
| 8097753 | DCLK2   | 11.983687  | up | doublecortin-like kinase 2                                  |
| 7906919 | RGS4    | 11.848627  | up | regulator of G-protein signaling 4                          |
| 7961532 | ARHGDIB | 11.600758  | up | Rho GDP dissociation inhibitor (GDI) beta                   |
| 8069689 | ADAMTS5 | 11.5972805 | up | ADAM metalloproteinase with thrombospondin type 1 mo        |
| 8050007 | PXDN    | 11.579761  | up | peroxidase homolog (Drosophila)                             |
| 7952205 | MCAM    | 11.407302  | up | melanoma cell adhesion molecule                             |
| 8001800 | CDH11   | 11.356074  | up | cadherin 11, type 2, OB-cadherin (osteoblast)               |
| 8121949 | LAMA2   | 11.3407955 | up | laminin, alpha 2 (merosin, congenital muscular dystrophy)   |
| 8123104 | FNDC1   | 11.322584  | up | fibronectin type III domain containing 1                    |
| 7905147 | C1orf54 | 11.07904   | up | chromosome 1 open reading frame 54                          |
| 8046922 | COL3A1  | 10.714236  | up | collagen, type III, alpha 1 (Ehlers-Danlos syndrome type IV |
| 8146957 | PI15    | 10.688923  | up | peptidase inhibitor 15                                      |
| 7972750 | COL4A1  | 10.66342   | up | collagen, type IV, alpha 1                                  |
| 8129573 | MOXD1   | 10.641282  | up | monooxygenase, DBH-like 1                                   |
| 8105013 | EGFLAM  | 10.588038  | up | EGF-like, fibronectin type III and laminin G domains        |
| 8155864 | RORB    | 10.54466   | up | RAR-related orphan receptor B                               |
| 8072876 | LGALS1  | 10.441154  | up | lectin, galactoside-binding, soluble, 1 (galectin 1)        |
| 7937952 | OR51E1  | 10.396446  | up | olfactory receptor, family 51, subfamily E, member 1        |

Supplemental Table 1a  
eMSC vs. eEP

|         |               |           |    |                                                                          |
|---------|---------------|-----------|----|--------------------------------------------------------------------------|
| 8057506 | FRZB          | 10.315161 | up | frizzled-related protein                                                 |
| 7988467 | FBN1          | 10.270378 | up | fibrillin 1                                                              |
| 7997642 | CRISPLD2      | 10.205807 | up | cysteine-rich secretory protein LCCL domain containing 2                 |
| 8101659 | SPARCL1       | 10.200091 | up | SPARC-like 1 (mast9, hevin)                                              |
| 8081067 | HTR1F         | 10.151827 | up | 5-hydroxytryptamine (serotonin) receptor 1F                              |
| 7965040 | PHLDA1        | 9.940473  | up | pleckstrin homology-like domain, family A, member 1                      |
| 7995681 | MMP2          | 9.737001  | up | matrix metalloproteinase 2 (gelatinase A, 72kDa gelatinase               |
| 8163202 | SVEP1         | 9.726731  | up | sushi, von Willebrand factor type A, EGF and pentraxin do                |
| 8096875 | ENPEP         | 9.70702   | up | glutamyl aminopeptidase (aminopeptidase A)                               |
| 8105229 | PELO ITGA1    | 9.642977  | up | pelota homolog (Drosophila)   integrin, alpha 1                          |
| 8095751 | DKFZP564O0823 | 9.5594425 | up |                                                                          |
| 8057578 | CALCRL        | 9.513786  | up | calcitonin receptor-like                                                 |
| 8110932 | SEMA5A        | 9.490686  | up | sema domain, seven thrombospondin repeats (type 1 and                    |
| 8150698 | SNAI2         | 9.416415  | up | snail homolog 2 (Drosophila)                                             |
| 8014768 | PLXDC1        | 9.385873  | up | plexin domain containing 1                                               |
| 8099982 | APBB2         | 9.335447  | up | amyloid beta (A4) precursor protein-binding, family B, me                |
| 8085665 | RFTN1         | 9.016815  | up | raftlin, lipid raft linker 1                                             |
| 8162394 | ASPN          | 8.951345  | up | asporin                                                                  |
| 8163896 | STOM          | 8.918233  | up | stomatin                                                                 |
| 8092707 | LEPREL1       | 8.905254  | up | leprecan-like 1                                                          |
| 7938225 | OLFML1        | 8.87207   | up | olfactomedin-like 1                                                      |
| 8106393 | F2R           | 8.709909  | up | coagulation factor II (thrombin) receptor                                |
| 8018966 | TIMP2         | 8.661832  | up | TIMP metalloproteinase inhibitor 2                                       |
| 7903214 | LPPR4         | 8.627643  | up | plasticity related gene 1                                                |
| 8101675 | ABCG2         | 8.589982  | up | ATP-binding cassette, sub-family G (WHITE), member 2                     |
| 8113800 | FBN2          | 8.533026  | up | fibrillin 2 (congenital contractural arachnodactyly)                     |
| 8166079 | EGFL6         | 8.491811  | up | EGF-like-domain, multiple 6                                              |
| 7954293 | PDE3A         | 8.490945  | up | phosphodiesterase 3A, cGMP-inhibited                                     |
| 8162404 | ECM2          | 8.39878   | up | extracellular matrix protein 2, female organ and adipocyte               |
| 8004545 | ATP1B2        | 8.32292   | up | ATPase, Na <sup>+</sup> /K <sup>+</sup> transporting, beta 2 polypeptide |
| 8046695 | ITGA4         | 8.173707  | up | integrin, alpha 4 (antigen CD49D, alpha 4 subunit of VLA-4               |
| 8064539 | CPXM1         | 8.119926  | up | carboxypeptidase X (M14 family), member 1                                |
| 8036710 | GMFG          | 8.070192  | up | glia maturation factor, gamma                                            |

Supplemental Table 1a  
eMSC vs. eEP

|         |                  |           |    |                                                               |
|---------|------------------|-----------|----|---------------------------------------------------------------|
| 8145470 | DPYSL2           | 8.067399  | up | dihydropyrimidinase-like 2                                    |
| 7915229 | HEYL             | 8.010626  | up | hairy/enhancer-of-split related with YRPW motif-like          |
| 7907222 | PRRX1            | 7.978912  | up | paired related homeobox 1                                     |
| 7906900 | DDR2             | 7.8985634 | up | discoidin domain receptor tyrosine kinase 2                   |
| 8131844 | GPNMB            | 7.7600293 | up | glycoprotein (transmembrane) nmb                              |
| 7960850 | SLC2A14 SLC2A3   | 7.698911  | up | solute carrier family 2 (facilitated glucose transporter), me |
| 7906878 | DDR2             | 7.6505327 | up | discoidin domain receptor tyrosine kinase 2                   |
| 7925531 | AKT3             | 7.5937314 | up | v-akt murine thymoma viral oncogene homolog 3 (proteir        |
| 8145361 | NEFM             | 7.518595  | up | neurofilament, medium polypeptide 150kDa                      |
| 8115234 | ANXA6            | 7.3884854 | up | annexin A6                                                    |
| 8142345 | DOCK4            | 7.3683553 | up | dedicator of cytokinesis 4                                    |
| 8099524 | LDB2             | 7.310877  | up | LIM domain binding 2                                          |
| 8151512 | PAG1             | 7.2616105 | up | phosphoprotein associated with glycosphingolipid microd       |
| 7936968 | ADAM12           | 7.216624  | up | ADAM metallopeptidase domain 12 (meltrin alpha)               |
| 8122807 | AKAP12           | 7.167212  | up | A kinase (PRKA) anchor protein (gravin) 12                    |
| 8090098 | MYLK             | 7.161019  | up | myosin light chain kinase                                     |
| 8106573 | THBS4            | 7.1513157 | up | thrombospondin 4                                              |
| 8050766 | ADCY3            | 7.1135006 | up | adenylate cyclase 3                                           |
| 8151816 | GEM              | 7.022526  | up | GTP binding protein overexpressed in skeletal muscle          |
| 8097957 | GUCY1A3          | 6.95283   | up | guanylate cyclase 1, soluble, alpha 3                         |
| 8134869 | PCOLCE           | 6.9103565 | up | procollagen C-endopeptidase enhancer                          |
| 8174189 | TMSL8 MGC39900   | 6.872727  | up | thymosin-like 8   thymosin beta15b                            |
| 8104663 | CDH6             | 6.8478765 | up | cadherin 6, type 2, K-cadherin (fetal kidney)                 |
| 7945680 | H19              | 6.8355975 | up |                                                               |
| 8020110 | RAB31            | 6.8156557 | up |                                                               |
| 7961702 | KCNJ8            | 6.7398124 | up | potassium inwardly-rectifying channel, subfamily J, memb      |
| 7990632 | SGK269           | 6.72046   | up | NKF3 kinase family member                                     |
| 8121257 | PRDM1            | 6.6692343 | up | PR domain containing 1, with ZNF domain                       |
| 7945262 | JAM3             | 6.6509924 | up | junctional adhesion molecule 3                                |
| 8151684 | C8orf57 LOC10012 | 6.6202602 | up | chromosome 8 open reading frame 57   hypothetical LOC         |
| 7944082 | TAGLN            | 6.577153  | up | transgelin                                                    |
| 7937772 | IGF2             | 6.549632  | up | insulin-like growth factor 2 (somatomedin A)                  |
| 8150509 | PLAT             | 6.537773  | up | plasminogen activator, tissue                                 |

Supplemental Table 1a  
eMSC vs. eEP

|         |               |           |    |                                                               |
|---------|---------------|-----------|----|---------------------------------------------------------------|
| 7919815 | CTSK          | 6.5332866 | up | cathepsin K                                                   |
| 8057620 | COL5A2        | 6.4697433 | up | collagen, type V, alpha 2                                     |
| 8152617 | HAS2          | 6.432604  | up | hyaluronan synthase 2                                         |
| 7906307 | KIRREL        | 6.399863  | up | kin of IRRE like (Drosophila)                                 |
| 8047127 | MYO1B         | 6.309224  | up | myosin IB                                                     |
| 7999674 | MYH11         | 6.2899384 | up | myosin, heavy chain 11, smooth muscle                         |
| 8157153 | PALM2-AKAP2   | 6.259479  | up |                                                               |
| 8059413 | DOCK10        | 6.1910973 | up | dedicator of cytokinesis 10                                   |
| 7950555 | LRRC32        | 6.1707153 | up | leucine rich repeat containing 32                             |
| 8038319 | HRC           | 6.1648455 | up | histidine rich calcium binding protein                        |
| 7997504 | CDH13         | 6.1554785 | up | cadherin 13, H-cadherin (heart)                               |
| 7976073 | FLRT2         | 6.066825  | up | fibronectin leucine rich transmembrane protein 2              |
| 8151686 | MMP16         | 6.056421  | up | matrix metalloproteinase 16 (membrane-inserted)               |
| 8089544 | CCDC80        | 6.021498  | up | coiled-coil domain containing 80                              |
| 7947512 | DKFZP586H2123 | 5.9716773 | up | regeneration associated muscle protease                       |
| 7939365 | FJX1          | 5.9477983 | up | four jointed box 1 (Drosophila)                               |
| 8067040 | NFATC2        | 5.9179277 | up | nuclear factor of activated T-cells, cytoplasmic, calcineurin |
| 8069269 | COL6A1        | 5.8840866 | up | collagen, type VI, alpha 1                                    |
| 8056257 | FAP           | 5.8640146 | up | fibroblast activation protein, alpha                          |
| 7951662 | CRYAB         | 5.8412485 | up | crystallin, alpha B                                           |
| 8072626 | TIMP3         | 5.819831  | up | TIMP metalloproteinase inhibitor 3 (Sorsby fundus dystrop     |
| 7926916 | ZEB1          | 5.787029  | up | zinc finger E-box binding homeobox 1                          |
| 8078330 | RBMS3         | 5.7833805 | up | RNA binding motif, single stranded interacting protein        |
| 7970033 | COL4A2        | 5.6824436 | up | collagen, type IV, alpha 2                                    |
| 7965873 | IGF1          | 5.671659  | up | insulin-like growth factor 1 (somatomedin C)                  |
| 8088979 | VGLL3         | 5.671587  | up | vestigial like 3 (Drosophila)                                 |
| 8138067 | PSCD3         | 5.6598616 | up | pleckstrin homology, Sec7 and coiled-coil domains 3           |
| 7953603 | C1S           | 5.657471  | up | complement component 1, s subcomponent                        |
| 8167185 | TIMP1         | 5.5823245 | up | TIMP metalloproteinase inhibitor 1                            |
| 8106098 | MAP1B         | 5.575596  | up | microtubule-associated protein 1B                             |
| 8101828 | TSPAN5        | 5.5578837 | up | tetraspanin 5                                                 |
| 7991234 | MFGE8         | 5.555486  | up | milk fat globule-EGF factor 8 protein                         |
| 8036473 | PPP1R14A      | 5.550947  | up | protein phosphatase 1, regulatory (inhibitor) subunit 14A     |

Supplemental Table 1a  
eMSC vs. eEP

|         |                    |           |    |                                                          |
|---------|--------------------|-----------|----|----------------------------------------------------------|
| 8148501 | PTP4A3   LOC10013: | 5.5396385 | up | protein tyrosine phosphatase type IVA, member 3   simila |
| 7982597 | THBS1              | 5.533235  | up | thrombospondin 1                                         |
| 8041383 | LTBP1              | 5.51515   | up | latent transforming growth factor beta binding protein 1 |
| 8136347 | CALD1              | 5.5019603 | up | caldesmon 1                                              |
| 8102950 | INPP4B             | 5.4972086 | up | inositol polyphosphate-4-phosphatase, type II, 105kDa    |
| 7906061 | SYT11              | 5.488002  | up | synaptotagmin XI                                         |
| 8006214 | CENTA2             | 5.2327294 | up | centaurin, alpha 2                                       |
| 8176026 | FLNA               | 5.2195888 | up | filamin A, alpha (actin binding protein 280)             |
| 8056343 | COBLL1             | 5.181384  | up | COBL-like 1                                              |
| 8047784 | ZDBF2              | 5.1787224 | up | zinc finger, DBF-type containing 2                       |
| 8148070 | COL14A1            | 5.134301  | up | collagen, type XIV, alpha 1                              |
| 8108217 | TGFBI              | 5.129335  | up | transforming growth factor, beta-induced, 68kDa          |
| 8097867 | KIAA0922           | 5.0801187 | up |                                                          |
| 8140579 | CACNA2D1           | 5.061368  | up | calcium channel, voltage-dependent, alpha 2/delta subun  |
| 8161044 | TPM2               | 5.0568013 | up | tropomyosin 2 (beta)                                     |
| 7905329 | MLLT11             | 5.054736  | up | myeloid/lymphoid or mixed-lineage leukemia (trithorax h  |
| 8035896 | TSHZ3              | 5.00855   | up | teashirt zinc finger homeobox 3                          |
| 8108749 | PCDHB18            | 5.008513  | up | protocadherin beta 18 pseudogene                         |
| 7962250 | CPNE8              | 5.0032687 | up | copine VIII                                              |
| 8077323 | CNTN4              | 4.99473   | up | contactin 4                                              |
| 8040365 | TRIB2              | 4.9714217 | up | tribbles homolog 2 (Drosophila)                          |
| 8016646 | COL1A1             | 4.9448495 | up | collagen, type I, alpha 1                                |
| 7964660 | AVPR1A             | 4.9263763 | up | arginine vasopressin receptor 1A                         |
| 8169541 | DOCK11             | 4.9098415 | up | dedicator of cytokinesis 11                              |
| 8089112 | FILIP1L            | 4.879243  | up | filamin A interacting protein 1-like                     |
| 7932082 | CCDC3              | 4.859053  | up | coiled-coil domain containing 3                          |
| 8152522 | ENPP2              | 4.853854  | up | ectonucleotide pyrophosphatase/phosphodiesterase 2 (at   |
| 8135734 | C7orf58            | 4.845587  | up | chromosome 7 open reading frame 58                       |
| 8092970 | APOD               | 4.810966  | up | apolipoprotein D                                         |
| 8067157 | CBLN4              | 4.7945075 | up | cerebellin 4 precursor                                   |
| 7970924 | STARD13            | 4.782267  | up | StAR-related lipid transfer (START) domain containing 13 |
| 8115691 | SLIT3              | 4.7700415 | up | slit homolog 3 (Drosophila)                              |
| 7905220 | ECM1               | 4.766947  | up | extracellular matrix protein 1                           |

Supplemental Table 1a  
eMSC vs. eEP

|         |                  |           |    |                                                                               |
|---------|------------------|-----------|----|-------------------------------------------------------------------------------|
| 8174610 | LRCH2            | 4.763786  | up | leucine-rich repeats and calponin homology (CH) domain                        |
| 8139212 | GLI3             | 4.755533  | up |                                                                               |
| 8007420 | AOC3             | 4.712307  | up | amine oxidase, copper containing 3 (vascular adhesion protein 1)              |
| 8039607 | PEG3 ZIM2        | 4.7086344 | up | paternally expressed 3   zinc finger, imprinted 2                             |
| 7970954 | DCLK1            | 4.703135  | up | doublecortin-like kinase 1                                                    |
| 7902127 | SGIP1            | 4.6985865 | up | SH3-domain GRB2-like (endophilin) interacting protein 1                       |
| 8091867 | BCHE             | 4.698123  | up | butyrylcholinesterase                                                         |
| 8126428 | TRERF1           | 4.6849813 | up | transcriptional regulating factor 1                                           |
| 8052269 | CCDC88A          | 4.671764  | up | coiled-coil domain containing 88A                                             |
| 8134263 | COL1A2           | 4.6591177 | up | collagen, type I, alpha 2                                                     |
| 8042439 | ANTXR1           | 4.622141  | up | anthrax toxin receptor 1                                                      |
| 8046333 | CYBRD1           | 4.6113577 | up | cytochrome b reductase 1                                                      |
| 7974689 | DACT1            | 4.600902  | up | dapper, antagonist of beta-catenin, homolog 1 (Xenopus laevis)                |
| 8113504 | C5orf13          | 4.5971527 | up | chromosome 5 open reading frame 13                                            |
| 8121588 | DSE              | 4.576738  | up | dermatan sulfate epimerase                                                    |
| 8043363 | C2orf59 LOC54147 | 4.5592937 | up | chromosome 2 open reading frame 59   hypothetical LOC54147                    |
| 7966749 | TESC             | 4.5585456 | up | tescalcin                                                                     |
| 7932796 | SVIL             | 4.542746  | up | supervillin                                                                   |
| 8083779 | SERPINI1         | 4.5377536 | up | serpin peptidase inhibitor, clade I (neuroserpin), member 1                   |
| 7970763 | FLT1             | 4.5071077 | up | fms-related tyrosine kinase 1 (vascular endothelial growth factor receptor 1) |
| 7970569 | SACS             | 4.49427   | up | spastic ataxia of Charlevoix-Saguenay (saccin)                                |
| 7922717 | RGS16            | 4.4904637 | up | regulator of G-protein signaling 16                                           |
| 8160040 | PTPRD            | 4.4866066 | up | protein tyrosine phosphatase, receptor type, D                                |
| 8161964 | FRMD3            | 4.480713  | up | FERM domain containing 3                                                      |
| 8100541 | IGFBP7           | 4.4805126 | up | insulin-like growth factor binding protein 7                                  |
| 8058091 | SATB2            | 4.4529667 | up | SATB homeobox 2                                                               |
| 8117995 | TUBB             | 4.450812  | up | tubulin, beta                                                                 |
| 8107307 | CAMK4            | 4.450164  | up | calcium/calmodulin-dependent protein kinase IV                                |
| 8177858 | TUBB             | 4.4427004 | up | tubulin, beta                                                                 |
| 8179174 | TUBB             | 4.4408336 | up | tubulin, beta                                                                 |
| 7933488 | C10orf72         | 4.4237304 | up | chromosome 10 open reading frame 72                                           |
| 8149413 | DLC1             | 4.3980246 | up | deleted in liver cancer 1                                                     |
| 8083968 | NLGN1            | 4.3603625 | up | neuroligin 1                                                                  |

Supplemental Table 1a  
eMSC vs. eEP

|         |                  |           |    |                                                               |
|---------|------------------|-----------|----|---------------------------------------------------------------|
| 7942957 | PRSS23           | 4.3587766 | up | protease, serine, 23                                          |
| 7942596 | SERPINH1         | 4.3509727 | up | serpin peptidase inhibitor, clade H (heat shock protein 47)   |
| 8094911 | ATP10D           | 4.333474  | up | ATPase, class V, type 10D                                     |
| 8081288 | TMEM45A          | 4.3226366 | up | transmembrane protein 45A                                     |
| 8147461 | SDC2             | 4.2922688 | up | syndecan 2                                                    |
| 7943369 | TMEM133          | 4.284354  | up | transmembrane protein 133                                     |
| 8092520 | LOC285382        | 4.2576303 | up | hypothetical gene supported by AK091454                       |
| 8097991 | TDO2             | 4.2514653 | up | tryptophan 2,3-dioxygenase                                    |
| 8162533 | PTCH1            | 4.250068  | up | patched homolog 1 (Drosophila)                                |
| 8041781 | EPAS1            | 4.2156    | up | endothelial PAS domain protein 1                              |
| 8104079 | FAT              | 4.209736  | up |                                                               |
| 7961083 | CLEC2B           | 4.2034583 | up | C-type lectin domain family 2, member B                       |
| 7956856 | MSRB3            | 4.1845336 | up | methionine sulfoxide reductase B3                             |
| 8127767 | ELOVL4           | 4.184053  | up | elongation of very long chain fatty acids (FEN1/Elo2, SUR4    |
| 8121712 | SLC35F1          | 4.1645207 | up | solute carrier family 35, member F1                           |
| 8172708 | NUDT11           | 4.156832  | up | nudix (nucleoside diphosphate linked moiety X)-type moti      |
| 7966690 | TBX3             | 4.152437  | up | T-box 3 (ulnar mammary syndrome)                              |
| 8108697 | PCDHB5           | 4.131452  | up | protocadherin beta 5                                          |
| 8114814 | NR3C1            | 4.1241846 | up | nuclear receptor subfamily 3, group C, member 1 (glucoc       |
| 8054611 | C2orf59 LOC54147 | 4.121842  | up | chromosome 2 open reading frame 59   hypothetical LOC         |
| 8137670 | PDGFA            | 4.1050243 | up | platelet-derived growth factor alpha polypeptide              |
| 8102848 | SETD7            | 4.091811  | up | SET domain containing (lysine methyltransferase) 7            |
| 7904158 | OLFML3           | 4.0916653 | up | olfactomedin-like 3                                           |
| 8171172 | MXRA5            | 4.08271   | up | matrix-remodelling associated 5                               |
| 8051762 | SLC8A1           | 4.080743  | up | solute carrier family 8 (sodium/calcium exchanger), memt      |
| 8003667 | SERPINF1         | 4.08028   | up | serpin peptidase inhibitor, clade F (alpha-2 antiplasmin, pi  |
| 8095303 | LPHN3            | 4.080261  | up | latrophilin 3                                                 |
| 8108724 | PCDHB10          | 4.0770574 | up | protocadherin beta 10                                         |
| 7968417 | FRY              | 4.068975  | up | furry homolog (Drosophila)                                    |
| 8042788 | ACTG2            | 4.0687175 | up | actin, gamma 2, smooth muscle, enteric                        |
| 8151768 | RUNX1T1          | 4.051766  | up | runt-related transcription factor 1; translocated to, 1 (cycl |
| 7951977 | FXD6             | 4.050826  | up | FXD domain containing ion transport regulator 6               |
| 8108753 | PCDHB15          | 4.0494447 | up | protocadherin beta 15                                         |



Supplemental Table 1a  
eMSC vs. eEP

|         |               |           |    |                                                          |
|---------|---------------|-----------|----|----------------------------------------------------------|
| 8030007 | EMP3          | 4.027714  | up | epithelial membrane protein 3                            |
| 7979204 | FERMT2        | 4.0066423 | up | fermitin family homolog 2 (Drosophila)                   |
| 8048749 | KCNE4         | 3.9981122 | up | potassium voltage-gated channel, Isk-related family, mem |
| 8047248 | PLCL1         | 3.9879813 | up | phospholipase C-like 1                                   |
| 8023598 | RNF152        | 3.9831774 | up | ring finger protein 152                                  |
| 7938485 | MICAL2        | 3.9631054 | up | microtubule associated monooxygenase, calponin and LIM   |
| 7940565 | FADS2         | 3.953688  | up | fatty acid desaturase 2                                  |
| 7937335 | IFITM1        | 3.9332047 | up | interferon induced transmembrane protein 1 (9-27)        |
| 8047926 | MAP2          | 3.924339  | up | microtubule-associated protein 2                         |
| 7946589 | MRVI1         | 3.9184303 | up | murine retrovirus integration site 1 homolog             |
| 8120468 | BAI3          | 3.918003  | up | brain-specific angiogenesis inhibitor 3                  |
| 7976810 | SNORD113-3    | 3.885339  | up | small nucleolar RNA, C/D box 113-3                       |
| 8162908 | GRIN3A        | 3.8813393 | up | glutamate receptor, ionotropic, N-methyl-D-aspartate 3A  |
| 8041644 | PLEKHH2       | 3.8732154 | up | pleckstrin homology domain containing, family H (with M) |
| 8021685 | CCDC102B      | 3.8640466 | up | coiled-coil domain containing 102B                       |
| 7976814 | SNORD114-2    | 3.8547812 | up | small nucleolar RNA, C/D box 114-2                       |
| 7956551 | GEFT SLC26A10 | 3.8447313 | up | RhoA/RAC/CDC42 exchange factor   solute carrier family : |
| 8057045 | FKBP7         | 3.8232658 | up | FK506 binding protein 7                                  |
| 7980908 | FBLN5         | 3.8164043 | up | fibulin 5                                                |
| 8062251 | EPB41L1       | 3.8147507 | up | erythrocyte membrane protein band 4.1-like 1             |
| 7943349 | FLJ32810      | 3.80734   | up |                                                          |
| 8044021 | IL1RL1        | 3.806449  | up | interleukin 1 receptor-like 1                            |
| 8147573 | OSR2          | 3.7972152 | up | odd-skipped related 2 (Drosophila)                       |
| 8140840 | STEAP4        | 3.7875402 | up | STEAP family member 4                                    |
| 7944722 | UBASH3B       | 3.7789185 | up | ubiquitin associated and SH3 domain containing, B        |
| 8071758 | MMP11         | 3.7688298 | up | matrix metalloproteinase 11 (stromelysin 3)              |
| 8142194 | LAMB1         | 3.7662385 | up | laminin, beta 1                                          |
| 8023415 | TCF4          | 3.753584  | up | transcription factor 4                                   |
| 7929388 | PLCE1         | 3.7489219 | up | phospholipase C, epsilon 1                               |
| 7913357 | ECE1          | 3.744457  | up | endothelin converting enzyme 1                           |
| 8111387 | ADAMTS12      | 3.741271  | up | ADAM metalloproteinase with thrombospondin type 1 mo     |
| 8155192 | C9orf19       | 3.7267756 | up | chromosome 9 open reading frame 19                       |
| 8138765 | HOXA11        | 3.7236822 | up | homeobox A11                                             |

Supplemental Table 1a  
eMSC vs. eEP

|         |                 |           |    |                                                            |
|---------|-----------------|-----------|----|------------------------------------------------------------|
| 8041508 | QPCT            | 3.718512  | up | glutaminyl-peptide cyclotransferase (glutaminyl cyclase)   |
| 7990657 | TBC1D2B         | 3.704055  | up | TBC1 domain family, member 2B                              |
| 7956401 | SHMT2           | 3.6799438 | up | serine hydroxymethyltransferase 2 (mitochondrial)          |
| 8144742 | EFHA2           | 3.6759164 | up | EF-hand domain family, member A2                           |
| 8149551 | PSD3            | 3.6743245 | up | pleckstrin and Sec7 domain containing 3                    |
| 7965941 | GLT8D2          | 3.6675494 | up | glycosyltransferase 8 domain containing 2                  |
| 8143397 | DENND2A         | 3.6673076 | up | DENN/MADD domain containing 2A                             |
| 7953428 | CD4             | 3.6514838 | up |                                                            |
| 8017867 | FAM20A          | 3.6165667 | up | family with sequence similarity 20, member A               |
| 8029006 | AXL             | 3.61544   | up |                                                            |
| 8112980 | EDIL3           | 3.610157  | up | EGF-like repeats and discoidin I-like domains 3            |
| 7972682 | KDEL1           | 3.5928562 | up | KDEL (Lys-Asp-Glu-Leu) containing 1                        |
| 8068651 | PCP4            | 3.5863745 | up | Purkinje cell protein 4                                    |
| 7945991 | OR51E2          | 3.5856197 | up | olfactory receptor, family 51, subfamily E, member 2       |
| 8115490 | ADAM19          | 3.5733836 | up | ADAM metalloproteinase domain 19 (meltrin beta)            |
| 7942417 | ARHGEF17        | 3.553862  | up | Rho guanine nucleotide exchange factor (GEF) 17            |
| 8067233 | PMEPA1          | 3.5436523 | up | prostate transmembrane protein, androgen induced 1         |
| 8058869 | TNS1            | 3.5409706 | up | tensin 1                                                   |
| 8007154 | FKBP10          | 3.534451  | up | FK506 binding protein 10, 65 kDa                           |
| 8108720 | PCDHB9          | 3.5279286 | up | protocadherin beta 9                                       |
| 8057486 | PDE1A           | 3.521451  | up | phosphodiesterase 1A, calmodulin-dependent                 |
| 8148317 | MYC LOC10013052 | 3.5063984 | up | v-myc myelocytomatosis viral oncogene homolog (avian)      |
| 8161755 | ALDH1A1         | 3.501809  | up | aldehyde dehydrogenase 1 family, member A1                 |
| 7950743 | RAB30           | 3.4953744 | up |                                                            |
| 8006433 | CCL2            | 3.4875405 | up | chemokine (C-C motif) ligand 2                             |
| 7949503 | EFEMP2          | 3.4827125 | up | EGF-containing fibulin-like extracellular matrix protein 2 |
| 7954997 | TMEM16F         | 3.4774957 | up | transmembrane protein 16F                                  |
| 8170119 | FHL1            | 3.4732008 | up | four and a half LIM domains 1                              |
| 8096160 | ARHGAP24        | 3.449458  | up | Rho GTPase activating protein 24                           |
| 7934997 | PPP1R3C         | 3.4472013 | up | protein phosphatase 1, regulatory (inhibitor) subunit 3C   |
| 8127346 | RAB23           | 3.4247441 | up |                                                            |
| 8167815 | MAGED2          | 3.4165142 | up | melanoma antigen family D, 2                               |
| 7900340 | BMP8A           | 3.4150846 | up | bone morphogenetic protein 8a                              |

Supplemental Table 1a  
eMSC vs. eEP

|         |                 |           |    |                                                                      |
|---------|-----------------|-----------|----|----------------------------------------------------------------------|
| 7952601 | ETS1            | 3.4145176 | up | v-ets erythroblastosis virus E26 oncogene homolog 1 (avian)          |
| 7972336 | DZIP1           | 3.4141117 | up | DAZ interacting protein 1                                            |
| 7958202 | CHST11          | 3.4129207 | up | carbohydrate (chondroitin 4) sulfotransferase 11                     |
| 8105040 | OSMR            | 3.405387  | up | oncostatin M receptor                                                |
| 8140955 | CDK6            | 3.3989553 | up | cyclin-dependent kinase 6                                            |
| 8129120 | C6orf189        | 3.389297  | up | chromosome 6 open reading frame 189                                  |
| 7917728 | FAM69A RPL5     | 3.3853993 | up | family with sequence similarity 69, member A   ribosomal             |
| 7935613 | HPSE2           | 3.3852928 | up | heparanase 2                                                         |
| 8042830 | MTHFD2          | 3.3849337 | up | methylenetetrahydrofolate dehydrogenase (NADP+ dependent)            |
| 8149555 | PSD3            | 3.3720183 | up | pleckstrin and Sec7 domain containing 3                              |
| 7974316 | FRMD6           | 3.3667593 | up | FERM domain containing 6                                             |
| 8045470 | THSD7B          | 3.3649685 | up | thrombospondin, type I, domain containing 7B                         |
| 7984112 | RAB8B           | 3.3638403 | up |                                                                      |
| 8151756 | TMEM55A         | 3.3607137 | up | transmembrane protein 55A                                            |
| 8171684 | SH3KBP1         | 3.357219  | up | SH3-domain kinase binding protein 1                                  |
| 7946142 | PRKCDBP         | 3.354513  | up | protein kinase C, delta binding protein                              |
| 8096176 | PTPN13          | 3.3415625 | up | protein tyrosine phosphatase, non-receptor type 13 (ApoE receptor 2) |
| 8078286 | RARB LOC1001303 | 3.3169098 | up | retinoic acid receptor, beta   hypothetical protein LOC1001303       |
| 8048026 | CPS1            | 3.3164093 | up | carbamoyl-phosphate synthetase 1, mitochondrial                      |
| 8024111 | CNN2            | 3.31516   | up | calponin 2                                                           |
| 7969613 | GPC6            | 3.3050885 | up | glypican 6                                                           |
| 8144322 | MYOM2           | 3.303565  | up | myomesin (M-protein) 2, 165kDa                                       |
| 8119357 | DAAM2           | 3.2998562 | up | dishevelled associated activator of morphogenesis 2                  |
| 7973336 | MMP14           | 3.2993028 | up | matrix metalloproteinase 14 (membrane-inserted)                      |
| 8092578 | ETV5            | 3.2986217 | up | ets variant gene 5 (ets-related molecule)                            |
| 7965322 | KITLG           | 3.295684  | up | KIT ligand                                                           |
| 8042038 | RPL23AP13       | 3.293368  | up | ribosomal protein L23a pseudogene 13                                 |
| 7929511 | ENTPD1          | 3.2904727 | up | ectonucleoside triphosphate diphosphohydrolase 1                     |
| 7905088 | HIST2H2AC BOLA1 | 3.2882786 | up | histone cluster 2, H2ac   bolA homolog 1 (E. coli)                   |
| 8106986 | RHOBTB3         | 3.2873898 | up | Rho-related BTB domain containing 3                                  |
| 8167835 | TRO             | 3.283628  | up | trophinin                                                            |
| 8122222 | PDE7B           | 3.2774365 | up | phosphodiesterase 7B                                                 |
| 8150428 | SFRP1           | 3.2706177 | up | secreted frizzled-related protein 1                                  |

Supplemental Table 1a  
eMSC vs. eEP

|         |                 |           |    |                                                            |
|---------|-----------------|-----------|----|------------------------------------------------------------|
| 7970844 | KATNAL1         | 3.2662508 | up | katanin p60 subunit A-like 1                               |
| 8021129 | C18orf23 RNF165 | 3.2652051 | up | chromosome 18 open reading frame 23   ring finger prote    |
| 7953200 | CCND2           | 3.263396  | up | cyclin D2                                                  |
| 7972003 | KLF12           | 3.261225  | up | Kruppel-like factor 12                                     |
| 7903777 | GSTM5           | 3.2602682 | up | glutathione S-transferase M5                               |
| 7972826 | C13orf29        | 3.255323  | up | chromosome 13 open reading frame 29                        |
| 7938608 | SPON1           | 3.235216  | up | spondin 1, extracellular matrix protein                    |
| 8116418 | GFPT2           | 3.2331326 | up | glutamine-fructose-6-phosphate transaminase 2              |
| 8123678 | C6orf145        | 3.230103  | up | chromosome 6 open reading frame 145                        |
| 7921088 | NES             | 3.2254956 | up | nestin                                                     |
| 7991186 | NTRK3           | 3.219407  | up | neurotrophic tyrosine kinase, receptor, type 3             |
| 7989199 | ALDH1A2         | 3.2076764 | up | aldehyde dehydrogenase 1 family, member A2                 |
| 8132557 | AEBP1           | 3.2023196 | up | AE binding protein 1                                       |
| 8102532 | PDE5A           | 3.1999435 | up | phosphodiesterase 5A, cGMP-specific                        |
| 7968577 | NBEA            | 3.195922  | up | neurobeachin                                               |
| 8062852 | PKIG            | 3.1853886 | up | protein kinase (cAMP-dependent, catalytic) inhibitor gami  |
| 8171248 | KAL1            | 3.1792362 | up | Kallmann syndrome 1 sequence                               |
| 7969677 | MBNL2           | 3.175161  | up | muscleblind-like 2 (Drosophila)                            |
| 7960744 | C1R             | 3.171141  | up | complement component 1, r subcomponent                     |
| 8094301 | SLIT2           | 3.1546516 | up | slit homolog 2 (Drosophila)                                |
| 8174692 | 6-Sep           | 3.1545198 | up | septin 6                                                   |
| 7963092 | FMNL3           | 3.154001  | up | formin-like 3                                              |
| 8133860 | GNAI1           | 3.1479611 | up | guanine nucleotide binding protein (G protein), alpha inhi |
| 7950810 | SYTL2           | 3.1477516 | up | synaptotagmin-like 2                                       |
| 8040113 | DDEF2           | 3.145959  | up | development and differentiation enhancing factor 2         |
| 8086120 | DCLK3           | 3.135572  | up | doublecortin-like kinase 3                                 |
| 8036284 | COX7A1          | 3.1353283 | up | cytochrome c oxidase subunit VIIa polypeptide 1 (muscle)   |
| 7993458 | C16orf45        | 3.1345448 | up | chromosome 16 open reading frame 45                        |
| 7984079 | TPM1            | 3.1301644 | up | tropomyosin 1 (alpha)                                      |
| 8164200 | ANGPTL2         | 3.1274056 | up | angiopoietin-like 2                                        |
| 8077376 | ITPR1           | 3.1193256 | up | inositol 1,4,5-triphosphate receptor, type 1               |
| 7937330 | IFITM2          | 3.114547  | up | interferon induced transmembrane protein 2 (1-8D)          |
| 7989661 | OAZ2            | 3.108744  | up | ornithine decarboxylase antizyme 2                         |

Supplemental Table 1a  
eMSC vs. eEP

|         |               |           |    |                                                                                   |
|---------|---------------|-----------|----|-----------------------------------------------------------------------------------|
| 8015635 | PTRF          | 3.106855  | up | polymerase I and transcript release factor                                        |
| 8174670 | RP13-347D8.3  | 3.1057816 | up | KIAA1210 protein                                                                  |
| 8029950 | EHD2          | 3.1013794 | up | EH-domain containing 2                                                            |
| 8130867 | THBS2         | 3.0974648 | up | thrombospondin 2                                                                  |
| 7979824 | ACTN1         | 3.0950832 | up | actinin, alpha 1                                                                  |
| 8050160 | MBOAT2        | 3.0873854 | up | membrane bound O-acyltransferase domain containing 2                              |
| 8088919 | ROBO1         | 3.0776412 | up | roundabout, axon guidance receptor, homolog 1 (Drosophila)                        |
| 8133155 | TPST1         | 3.076922  | up | tyrosylprotein sulfotransferase 1                                                 |
| 8017039 | 4-Sep         | 3.0757627 | up | septin 4                                                                          |
| 8030383 | RCN3          | 3.0664244 | up | reticulocalbin 3, EF-hand calcium binding domain                                  |
| 8127051 | TRAM2         | 3.0663664 | up | translocation associated membrane protein 2                                       |
| 8046530 | HOXD11        | 3.0637393 | up | homeobox D11                                                                      |
| 7935188 | SORBS1        | 3.0635812 | up | sorbin and SH3 domain containing 1                                                |
| 8087935 | NT5DC2        | 3.06049   | up | 5'-nucleotidase domain containing 2                                               |
| 8149774 | LOXL2 ENTPD4  | 3.0596797 | up | lysyl oxidase-like 2   ectonucleoside triphosphate diphosphatase 4                |
| 8127201 | COL21A1       | 3.0580852 | up | collagen, type XXI, alpha 1                                                       |
| 8129985 | PLAGL1        | 3.0551293 | up | pleiomorphic adenoma gene-like 1                                                  |
| 8091078 | RBP1          | 3.045371  | up | retinol binding protein 1, cellular                                               |
| 7956301 | LRP1          | 3.029223  | up | low density lipoprotein-related protein 1 (alpha-2-macroglobulin receptor type 1) |
| 8104570 | FAM105A       | 3.0259724 | up | family with sequence similarity 105, member A                                     |
| 7982366 | SCG5          | 3.0139425 | up | secretogranin V (7B2 protein)                                                     |
| 8156278 | S1PR3 C9orf47 | 3.0125153 | up | sphingosine-1-phosphate receptor 3   chromosome 9 open reading frame 47           |
| 8025918 | CNN1          | 2.9994009 | up | calponin 1, basic, smooth muscle                                                  |
| 8124380 | HIST1H1A      | 2.9964154 | up | histone cluster 1, H1a                                                            |
| 7966135 | CORO1C        | 2.994129  | up | coronin, actin binding protein, 1C                                                |
| 8023727 | DSEL          | 2.9909837 | up | dermatan sulfate epimerase-like                                                   |
| 7983527 | SEMA6D        | 2.9888504 | up | sema domain, transmembrane domain (TM), and cytoplasmic domain containing 6       |
| 8089835 | FSTL1         | 2.977976  | up | follistatin-like 1                                                                |
| 8098441 | ODZ3          | 2.9751964 | up | odz, odd Oz/ten-m homolog 3 (Drosophila)                                          |
| 8100154 | CORIN         | 2.974674  | up | corin, serine peptidase                                                           |
| 8083166 | TRPC1         | 2.9743664 | up | transient receptor potential cation channel, subfamily C, member 1                |
| 7953564 | C12orf57      | 2.9714649 | up | chromosome 12 open reading frame 57                                               |
| 7902808 | HS2ST1        | 2.9705818 | up | heparan sulfate 2-O-sulfotransferase 1                                            |

Supplemental Table 1a  
eMSC vs. eEP

|         |                    |           |    |                                                              |
|---------|--------------------|-----------|----|--------------------------------------------------------------|
| 8119525 | HCRP1              | 2.9651468 | up |                                                              |
| 8145865 | GPR124             | 2.9628646 | up | G protein-coupled receptor 124                               |
| 7999079 | ADCY9              | 2.9577408 | up | adenylate cyclase 9                                          |
| 8075673 | RBM9               | 2.9492435 | up | RNA binding motif protein 9                                  |
| 8081590 | PHLDB2             | 2.9421673 | up | pleckstrin homology-like domain, family B, member 2          |
| 8168589 | ZNF711             | 2.9377625 | up | zinc finger protein 711                                      |
| 7902874 | LRRC8C             | 2.9268765 | up | leucine rich repeat containing 8 family, member C            |
| 8138749 | HOXA9              | 2.9264069 | up | homeobox A9                                                  |
| 8014233 | SLFN11             | 2.9257727 | up | schlafen family member 11                                    |
| 8041206 | LBH                | 2.9234214 | up | limb bud and heart development homolog (mouse)               |
| 7991335 | ANPEP              | 2.9208083 | up | alanyl (membrane) aminopeptidase (aminopeptidase N, a        |
| 8179595 | GABBR1             | 2.9194882 | up | gamma-aminobutyric acid (GABA) B receptor, 1                 |
| 7914648 | PHC2               | 2.9161718 | up | polyhomeotic homolog 2 (Drosophila)                          |
| 7962058 | TMTC1              | 2.9141715 | up | transmembrane and tetratricopeptide repeat containing 1      |
| 7951178 | TRPC6              | 2.9126966 | up | transient receptor potential cation channel, subfamily C, r  |
| 7939376 | LDLRAD3            | 2.9072516 | up | low density lipoprotein receptor class A domain containin    |
| 8016390 | COPZ2              | 2.906741  | up | coatomer protein complex, subunit zeta 2                     |
| 7928558 | ZMIZ1              | 2.9022899 | up | zinc finger, MIZ-type containing 1                           |
| 7974109 | LRFN5              | 2.897485  | up | leucine rich repeat and fibronectin type III domain contain  |
| 8112107 | PPAP2A             | 2.8954537 | up | phosphatidic acid phosphatase type 2A                        |
| 7908204 | HMCN1              | 2.890739  | up | hemicentin 1                                                 |
| 7944049 | SIDT2              | 2.8842301 | up | SID1 transmembrane family, member 2                          |
| 8178298 | GABBR1             | 2.8818111 | up | gamma-aminobutyric acid (GABA) B receptor, 1                 |
| 8117402 | HIST1H4E   HIST4H4 | 2.8775563 | up | histone cluster 1, H4e   histone cluster 4, H4   histone clu |
| 7961546 | EPS8               | 2.8728938 | up | epidermal growth factor receptor pathway substrate 8         |
| 8046895 | KIAA1946           | 2.8704264 | up |                                                              |
| 8036252 | CLIP3              | 2.8684955 | up | CAP-GLY domain containing linker protein 3                   |
| 8168749 | SRPX2              | 2.8630438 | up | sushi-repeat-containing protein, X-linked 2                  |
| 7963786 | ITGA5              | 2.8609765 | up | integrin, alpha 5 (fibronectin receptor, alpha polypeptide)  |
| 8107850 | CHSY3              | 2.859712  | up | chondroitin sulfate synthase 3                               |
| 8126839 | TNFRSF21           | 2.8571017 | up | tumor necrosis factor receptor superfamily, member 21        |
| 8126402 | TRERF1             | 2.8567882 | up | transcriptional regulating factor 1                          |
| 7980720 | TTC7B              | 2.8531559 | up | tetratricopeptide repeat domain 7B                           |

Supplemental Table 1a  
eMSC vs. eEP

|         |          |           |    |                                                          |
|---------|----------|-----------|----|----------------------------------------------------------|
| 8121601 | FAM26E   | 2.8528621 | up | family with sequence similarity 26, member E             |
| 8124280 | C6orf32  | 2.8524086 | up | chromosome 6 open reading frame 32                       |
| 7943051 | NAALAD2  | 2.852143  | up | N-acetylated alpha-linked acidic dipeptidase 2           |
| 7953040 | CACNA1C  | 2.8472118 | up | calcium channel, voltage-dependent, L type, alpha 1C sub |
| 8085774 | ZNF385D  | 2.8393364 | up | zinc finger protein 385D                                 |
| 8169389 | PAK3     | 2.8354023 | up | p21 (CDKN1A)-activated kinase 3                          |
| 8022674 | CDH2     | 2.8343842 | up | cadherin 2, type 1, N-cadherin (neuronal)                |
| 8017885 | ABCA8    | 2.8307867 | up | ATP-binding cassette, sub-family A (ABC1), member 8      |
| 7928944 | PAPSS2   | 2.8304868 | up | 3'-phosphoadenosine 5'-phosphosulfate synthase 2         |
| 8067305 | SYCP2    | 2.8286178 | up | synaptonemal complex protein 2                           |
| 8021695 | DOK6     | 2.823917  | up | docking protein 6                                        |
| 7951565 | ARHGAP20 | 2.8237014 | up | Rho GTPase activating protein 20                         |
| 8061572 | COX4I2   | 2.8233037 | up | cytochrome c oxidase subunit IV isoform 2 (lung)         |
| 8096314 | PKD2     | 2.8206925 | up | polycystic kidney disease 2 (autosomal dominant)         |
| 8102982 | GAB1     | 2.8199587 | up | GRB2-associated binding protein 1                        |
| 8037005 | TGFB1    | 2.8188384 | up | transforming growth factor, beta 1                       |
| 7953409 | PTMS     | 2.818156  | up | parathyrosin                                             |
| 8019964 | ARHGAP28 | 2.814463  | up | Rho GTPase activating protein 28                         |
| 7989670 | RBPM52   | 2.8144276 | up | RNA binding protein with multiple splicing 2             |
| 7931353 | PTPRE    | 2.8070478 | up | protein tyrosine phosphatase, receptor type, E           |
| 8049448 | CENTG2   | 2.803996  | up | centaurin, gamma 2                                       |
| 7955078 | PFKM     | 2.801387  | up | phosphofructokinase, muscle                              |
| 8143188 | CREB3L2  | 2.7999241 | up | cAMP responsive element binding protein 3-like 2         |
| 7910792 | RYR2     | 2.7996573 | up | ryanodine receptor 2 (cardiac)                           |
| 7924996 | C1orf198 | 2.799452  | up | chromosome 1 open reading frame 198                      |
| 7924773 | CDC42BPA | 2.7989702 | up | CDC42 binding protein kinase alpha (DMPK-like)           |
| 7986757 | NDN      | 2.7958336 | up | necdin homolog (mouse)                                   |
| 8068697 | MX2      | 2.7930982 | up | myxovirus (influenza virus) resistance 2 (mouse)         |
| 8157890 | PBX3     | 2.7908866 | up | pre-B-cell leukemia homeobox 3                           |
| 7947363 | WT1      | 2.78903   | up | Wilms tumor 1                                            |
| 8127646 | FILIP1   | 2.769562  | up | filamin A interacting protein 1                          |
| 8007323 | CNTNAP1  | 2.7690961 | up | contactin associated protein 1                           |
| 8139087 | SFRP4    | 2.7651079 | up | secreted frizzled-related protein 4                      |

Supplemental Table 1a  
eMSC vs. eEP

|         |          |           |    |                                                               |
|---------|----------|-----------|----|---------------------------------------------------------------|
| 7920271 | S100A4   | 2.7630255 | up | S100 calcium binding protein A4                               |
| 7923978 | CD34     | 2.7619283 | up |                                                               |
| 8034130 | KANK2    | 2.7592776 | up | KN motif and ankyrin repeat domains 2                         |
| 7936115 | SH3PXD2A | 2.7526696 | up | SH3 and PX domains 2A                                         |
| 8175393 | ARHGEF6  | 2.7523458 | up | Rac/Cdc42 guanine nucleotide exchange factor (GEF) 6          |
| 7943749 | LAYN     | 2.7486029 | up | layilin                                                       |
| 8155169 | RECK     | 2.7473578 | up | reversion-inducing-cysteine-rich protein with kazal motifs    |
| 8002969 | MAF      | 2.740462  | up | v-maf musculoaponeurotic fibrosarcoma oncogene homo           |
| 8095854 | 11-Sep   | 2.739547  | up | septin 11                                                     |
| 8063437 | TSHZ2    | 2.7353244 | up | teashirt zinc finger homeobox 2                               |
| 7972428 | OXGR1    | 2.7348797 | up | oxoglutarate (alpha-ketoglutarate) receptor 1                 |
| 7986329 | NR2F2    | 2.7345636 | up | nuclear receptor subfamily 2, group F, member 2               |
| 8097586 | GAB1     | 2.729808  | up | GRB2-associated binding protein 1                             |
| 7973709 | NFATC4   | 2.7275658 | up | nuclear factor of activated T-cells, cytoplasmic, calcineurir |
| 8081081 | EPHA3    | 2.7267275 | up | EPH receptor A3                                               |
| 7950990 | SLC36A4  | 2.717264  | up | solute carrier family 36 (proton/amino acid symporter), m     |
| 8099172 | CRMP1    | 2.7159424 | up | collapsin response mediator protein 1                         |
| 8064766 | RNF24    | 2.7038422 | up | ring finger protein 24                                        |
| 8112615 | ENC1     | 2.7009158 | up | ectodermal-neural cortex (with BTB-like domain)               |
| 8135378 | PRKAR2B  | 2.6967409 | up | protein kinase, cAMP-dependent, regulatory, type II, beta     |
| 7980485 | DIO2     | 2.693079  | up | deiodinase, iodothyronine, type II                            |
| 8101260 | ANTXR2   | 2.6907597 | up | anthrax toxin receptor 2                                      |
| 7962000 | PTHLH    | 2.6836534 | up | parathyroid hormone-like hormone                              |
| 7963054 | TUBA1A   | 2.677017  | up | tubulin, alpha 1a                                             |
| 8071768 | SMARCB1  | 2.671441  | up | SWI/SNF related, matrix associated, actin dependent regu      |
| 8075728 | MYH9     | 2.6702724 | up | myosin, heavy chain 9, non-muscle                             |
| 8095868 | UNQ3028  | 2.6694007 | up | TSSP3028                                                      |
| 8167973 | HEPH     | 2.6686623 | up | hephaestin                                                    |
| 8124798 | KIAA1949 | 2.6651149 | up |                                                               |
| 8026300 | CD97     | 2.664287  | up |                                                               |
| 8078252 | UBE2E2   | 2.6610544 | up | ubiquitin-conjugating enzyme E2E 2 (UBC4/5 homolog, ye        |
| 8108716 | PCDHB16  | 2.6603448 | up | protocadherin beta 16                                         |
| 8090591 | PLXND1   | 2.659718  | up | plexin D1                                                     |



Supplemental Table 1a  
eMSC vs. eEP

|         |                 |           |    |                                                                  |
|---------|-----------------|-----------|----|------------------------------------------------------------------|
| 7925342 | ERO1LB          | 2.6595957 | up | ERO1-like beta ( <i>S. cerevisiae</i> )                          |
| 8134098 | PFTK1           | 2.6592426 | up | PFTAIRE protein kinase 1                                         |
| 8123744 | F13A1           | 2.6492913 | up | coagulation factor XIII, A1 polypeptide                          |
| 8161056 | TLN1            | 2.6329184 | up | talin 1                                                          |
| 8173917 | NAP1L3          | 2.6196811 | up | nucleosome assembly protein 1-like 3                             |
| 7972557 | EBI2            | 2.6147864 | up | Epstein-Barr virus induced gene 2 (lymphocyte-specific G         |
| 8083749 | PPM1L           | 2.613429  | up | protein phosphatase 1 (formerly 2C)-like                         |
| 8049187 | EFHD1           | 2.6110666 | up | EF-hand domain family, member D1                                 |
| 8120402 | BAG2            | 2.6099777 | up | BCL2-associated athanogene 2                                     |
| 8169015 | TCEAL7          | 2.6094365 | up | transcription elongation factor A (SII)-like 7                   |
| 7957861 | TMEM16D         | 2.606442  | up | transmembrane protein 16D                                        |
| 7943562 | ELMOD1          | 2.5980663 | up | ELMO/CED-12 domain containing 1                                  |
| 8027650 | UBA2            | 2.5973299 | up | ubiquitin-like modifier activating enzyme 2                      |
| 8002403 | ABBA-1          | 2.5954838 | up | actin-bundling protein with BAIAP2 homology                      |
| 7898988 | CLIC4           | 2.5937672 | up | chloride intracellular channel 4                                 |
| 7997712 | IRF8            | 2.5934365 | up | interferon regulatory factor 8                                   |
| 8124654 | GABBR1          | 2.5877657 | up | gamma-aminobutyric acid (GABA) B receptor, 1                     |
| 8114050 | 8-Sep           | 2.5868797 | up | septin 8                                                         |
| 7902495 | NEXN            | 2.5860224 | up | nexilin (F actin binding protein)                                |
| 8034940 | NOTCH3          | 2.5800683 | up | Notch homolog 3 ( <i>Drosophila</i> )                            |
| 8137485 | DPP6            | 2.5798488 | up | dipeptidyl-peptidase 6                                           |
| 8165217 | NOTCH1          | 2.5762265 | up | Notch homolog 1, translocation-associated ( <i>Drosophila</i> )  |
| 7970111 | ARHGEF7         | 2.575471  | up | Rho guanine nucleotide exchange factor (GEF) 7                   |
| 8026407 | SYDE1           | 2.5726845 | up | synapse defective 1, Rho GTPase, homolog 1 ( <i>C. elegans</i> ) |
| 8016841 | TMEM100         | 2.5613391 | up | transmembrane protein 100                                        |
| 7922610 | ABL2            | 2.5598903 | up | v-abl Abelson murine leukemia viral oncogene homolog 2           |
| 7976795 | MEG3 LOC1001318 | 2.5582645 | up | maternally expressed 3   hypothetical protein LOC100131          |
| 7986214 | SLCO3A1         | 2.5580368 | up | solute carrier organic anion transporter family, member 3        |
| 7964665 | DPY19L2         | 2.545446  | up | dpy-19-like 2 ( <i>C. elegans</i> )                              |
| 8143144 | PTN             | 2.5418768 | up | pleiotrophin (heparin binding growth factor 8, neurite gro       |
| 8063444 | TSHZ2           | 2.540073  | up | teashirt zinc finger homeobox 2                                  |
| 8001197 | NETO2           | 2.5356057 | up | neuropilin (NRP) and tolloid (TLL)-like 2                        |
| 7923608 | REN             | 2.531618  | up | renin                                                            |

Supplemental Table 1a  
eMSC vs. eEP

|         |          |           |    |                                                            |
|---------|----------|-----------|----|------------------------------------------------------------|
| 7978285 | ADCY4    | 2.53035   | up | adenylate cyclase 4                                        |
| 8021047 | SETBP1   | 2.5259874 | up | SET binding protein 1                                      |
| 7984364 | SMAD3    | 2.5227382 | up | SMAD family member 3                                       |
| 7955663 | TENC1    | 2.519154  | up | tensin like C1 domain containing phosphatase (tensin 2)    |
| 8170538 | GABRQ    | 2.5168958 | up | gamma-aminobutyric acid (GABA) receptor, theta             |
| 7923386 | LMOD1    | 2.5156612 | up | leiomodulin 1 (smooth muscle)                              |
| 7934936 | SLC16A12 | 2.514504  | up | solute carrier family 16, member 12 (monocarboxylic acid   |
| 8017599 | PECAM1   | 2.509517  | up | platelet/endothelial cell adhesion molecule (CD31 antigen) |
| 8170891 | GDI1     | 2.505431  | up | GDP dissociation inhibitor 1                               |
| 8049544 | LRRFIP1  | 2.5053282 | up | leucine rich repeat (in FLII) interacting protein 1        |
| 8108301 | KIF20A   | 2.501873  | up | kinesin family member 20A                                  |
| 8097256 | FGF2     | 2.4972177 | up | fibroblast growth factor 2 (basic)                         |
| 8066214 | TGM2     | 2.4964995 | up | transglutaminase 2 (C polypeptide, protein-glutamine-gan   |
| 7963880 | ITGA7    | 2.4956245 | up | integrin, alpha 7                                          |
| 7971296 | EPSTI1   | 2.4945722 | up | epithelial stromal interaction 1 (breast)                  |
| 7974425 | SAMD4A   | 2.493858  | up | sterile alpha motif domain containing 4A                   |
| 8142497 | CTTNBP2  | 2.493558  | up | cortactin binding protein 2                                |
| 8062623 | PLCG1    | 2.492816  | up | phospholipase C, gamma 1                                   |
| 7963946 | MMP19    | 2.4880142 | up | matrix metalloproteinase 19                                |
| 8081838 | CDGAP    | 2.4868584 | up | Cdc42 GTPase-activating protein                            |
| 8088560 | ADAMTS9  | 2.484786  | up | ADAM metalloproteinase with thrombospondin type 1 mo       |
| 8020878 | MAPRE2   | 2.4829907 | up | microtubule-associated protein, RP/EB family, member 2     |
| 8126163 | KCNK17   | 2.4816225 | up | potassium channel, subfamily K, member 17                  |
| 8145055 | BMP1     | 2.4811606 | up | bone morphogenetic protein 1                               |
| 7910680 | GPR137B  | 2.475851  | up | G protein-coupled receptor 137B                            |
| 8069301 | COL6A2   | 2.47567   | up | collagen, type VI, alpha 2                                 |
| 7938528 | PARVA    | 2.475549  | up | parvin, alpha                                              |
| 7986049 | CRTC3    | 2.4751186 | up | CREB regulated transcription coactivator 3                 |
| 8087337 | LAMB2    | 2.4735458 | up | laminin, beta 2 (laminin S)                                |
| 8044462 | TTL      | 2.4733725 | up | tubulin tyrosine ligase                                    |
| 8095545 | RUFY3    | 2.471027  | up | RUN and FYVE domain containing 3                           |
| 7901969 | ROR1     | 2.4696858 | up | receptor tyrosine kinase-like orphan receptor 1            |
| 7945371 | IFITM3   | 2.469266  | up | interferon induced transmembrane protein 3 (1-8U)          |

Supplemental Table 1a  
eMSC vs. eEP

|         |               |           |    |                                                           |
|---------|---------------|-----------|----|-----------------------------------------------------------|
| 8120378 | KIAA1586      | 2.4526992 | up |                                                           |
| 7948229 | SLC43A3       | 2.4521368 | up | solute carrier family 43, member 3                        |
| 8076481 | CYB5R3        | 2.4520135 | up | cytochrome b5 reductase 3                                 |
| 8007828 | MAPT          | 2.451523  | up | microtubule-associated protein tau                        |
| 7989069 | PYGO1         | 2.4466233 | up | pygopus homolog 1 (Drosophila)                            |
| 8090193 | HEG1          | 2.4465156 | up | HEG homolog 1 (zebrafish)                                 |
| 7929012 | STAMBPL1      | 2.4423766 | up | STAM binding protein-like 1                               |
| 8135705 | KCND2         | 2.4415052 | up | potassium voltage-gated channel, Shal-related subfamily,  |
| 8130211 | SYNE1 C6orf98 | 2.4407134 | up | spectrin repeat containing, nuclear envelope 1   chromos  |
| 7968015 | TNFRSF19      | 2.4401042 | up | tumor necrosis factor receptor superfamily, member 19     |
| 7944493 | CBL           | 2.4394896 | up | Cas-Br-M (murine) ecotropic retroviral transforming sequ  |
| 8017133 | FAM33A        | 2.436236  | up | family with sequence similarity 33, member A              |
| 7924166 | BATF3         | 2.4333818 | up | basic leucine zipper transcription factor, ATF-like 3     |
| 8117594 | HIST1H2BM     | 2.4304023 | up | histone cluster 1, H2bm                                   |
| 8101701 | PPM1K         | 2.4285934 | up | protein phosphatase 1K (PP2C domain containing)           |
| 8064978 | JAG1          | 2.425463  | up | jagged 1 (Alagille syndrome)                              |
| 7929026 | LOC100132116  | 2.4244223 | up |                                                           |
| 8057898 | HECW2         | 2.4175148 | up | HECT, C2 and WW domain containing E3 ubiquitin protein    |
| 7944302 | PHLDB1        | 2.4166315 | up | pleckstrin homology-like domain, family B, member 1       |
| 7918622 | SLC16A1       | 2.4146657 | up | solute carrier family 16, member 1 (monocarboxylic acid t |
| 7990545 | CSPG4         | 2.4104    | up | chondroitin sulfate proteoglycan 4                        |
| 8045289 | RHOQ          | 2.4099288 | up | ras homolog gene family, member Q                         |
| 7954029 | CDKN1B        | 2.4091952 | up | cyclin-dependent kinase inhibitor 1B (p27, Kip1)          |
| 8064808 | SLC23A2       | 2.407334  | up | solute carrier family 23 (nucleobase transporters), membe |
| 8104693 | PDZD2         | 2.4069242 | up | PDZ domain containing 2                                   |
| 8128737 | MICAL1        | 2.4061284 | up | microtubule associated monooxygenase, calponin and LIM    |
| 8149629 | GFRA2         | 2.405111  | up | GDNF family receptor alpha 2                              |
| 7968236 | RASL11A       | 2.4026892 | up | RAS-like, family 11, member A                             |
| 7936856 | GALNAC4S-6ST  | 2.4014246 | up | B cell RAG associated protein                             |
| 8005235 | M-RIP         | 2.4009452 | up | myosin phosphatase-Rho interacting protein                |
| 8077366 | LRRN1         | 2.3992033 | up | leucine rich repeat neuronal 1                            |
| 8018754 | CYGB          | 2.3983097 | up | cytoglobin                                                |
| 8045336 | GPR39         | 2.3976493 | up | G protein-coupled receptor 39                             |

Supplemental Table 1a  
eMSC vs. eEP

|         |                 |           |    |                                                             |
|---------|-----------------|-----------|----|-------------------------------------------------------------|
| 7986527 | C15orf51        | 2.395477  | up | chromosome 15 open reading frame 51                         |
| 7940160 | DTX4            | 2.395318  | up | deltex 4 homolog (Drosophila)                               |
| 7960362 | UNQ3104         | 2.394487  | up | ACAH3104                                                    |
| 7971104 | TRPC4           | 2.3929834 | up | transient receptor potential cation channel, subfamily C, r |
| 8021181 | SCARNA17        | 2.3921437 | up | small Cajal body-specific RNA 17                            |
| 7897803 | PLOD1 LOC100130 | 2.39089   | up | procollagen-lysine 1, 2-oxoglutarate 5-dioxygenase 1   hy   |
| 7986509 | LOC441734       | 2.387719  | up | similar to hypothetical protein DKFZp434i1020               |
| 8140319 | HIP1            | 2.3846483 | up | huntingtin interacting protein 1                            |
| 8152491 | EXT1            | 2.3804636 | up | exostoses (multiple) 1                                      |
| 7936516 | HSPA12A         | 2.3802156 | up | heat shock 70kDa protein 12A                                |
| 8020551 | LAMA3           | 2.37434   | up | laminin, alpha 3                                            |
| 7977270 | LOC388022       | 2.3713558 | up | hypothetical gene supported by AK131040                     |
| 7997582 | WFDC1           | 2.368255  | up | WAP four-disulfide core domain 1                            |
| 7927876 | TET1            | 2.3682208 | up | tet oncogene 1                                              |
| 8006820 | LASP1           | 2.3678212 | up | LIM and SH3 protein 1                                       |
| 7983228 | MAP1A           | 2.3572419 | up | microtubule-associated protein 1A                           |
| 7918593 | RHOC            | 2.3544004 | up | ras homolog gene family, member C                           |
| 7923731 | RIPK5           | 2.3487992 | up | receptor interacting protein kinase 5                       |
| 7956573 | SLC26A10 GEFT   | 2.347934  | up | solute carrier family 26, member 10   RhoA/RAC/CDC42 e      |
| 8156060 | TLE4            | 2.34439   | up | transducin-like enhancer of split 4 (E(sp1) homolog, Drosoc |
| 8022559 | ANKRD29         | 2.3407774 | up | ankyrin repeat domain 29                                    |
| 7987385 | MEIS2           | 2.338637  | up | Meis homeobox 2                                             |
| 7929689 | MARVELD1        | 2.3356977 | up | MARVEL domain containing 1                                  |
| 7952436 | ESAM            | 2.3343298 | up | endothelial cell adhesion molecule                          |
| 7961900 | ITPR2           | 2.328608  | up | inositol 1,4,5-triphosphate receptor, type 2                |
| 7909236 | MAPKAPK2        | 2.3282232 | up | mitogen-activated protein kinase-activated protein kinase   |
| 8158739 | LAMC3           | 2.3255336 | up | laminin, gamma 3                                            |
| 7952490 | FEZ1            | 2.322991  | up | fasciculation and elongation protein zeta 1 (zygin I)       |
| 7906085 | LMNA            | 2.318904  | up | lamin A/C                                                   |
| 8113709 | LOX             | 2.3188162 | up | lysyl oxidase                                               |
| 8056890 | CHN1            | 2.3174593 | up | chimerin (chimaerin) 1                                      |
| 8047659 | ABI2            | 2.3168683 | up | abl interactor 2                                            |
| 7915444 | LEPRE1          | 2.3160167 | up | leucine proline-enriched proteoglycan (leprecan) 1          |

Supplemental Table 1a  
eMSC vs. eEP

|         |            |           |    |                                                          |
|---------|------------|-----------|----|----------------------------------------------------------|
| 8052654 | PELI1      | 2.315781  | up | pellino homolog 1 (Drosophila)                           |
| 7921014 | MEF2D      | 2.3093543 | up | myocyte enhancer factor 2D                               |
| 8091260 | SLC9A9     | 2.3047333 | up | solute carrier family 9 (sodium/hydrogen exchanger), mer |
| 8098344 | NBLA00301  | 2.3027532 | up | Nbla00301                                                |
| 7920600 | SHC1       | 2.302308  | up | SHC (Src homology 2 domain containing) transforming prc  |
| 7921821 | ADAMTS4    | 2.3020086 | up | ADAM metalloproteinase with thrombospondin type 1 mo     |
| 8044133 | NCK2       | 2.297438  | up | NCK adaptor protein 2                                    |
| 8152280 | LRP12      | 2.2970624 | up | low density lipoprotein-related protein 12               |
| 8102720 | ANKRD50    | 2.2946262 | up | ankyrin repeat domain 50                                 |
| 8169240 | PRPS1      | 2.2907453 | up | phosphoribosyl pyrophosphate synthetase 1                |
| 8043203 | VAMP5      | 2.283476  | up | vesicle-associated membrane protein 5 (myobrevin)        |
| 8099259 | AFAP1      | 2.2814574 | up | actin filament associated protein 1                      |
| 8018864 | SOCS3      | 2.270428  | up | suppressor of cytokine signaling 3                       |
| 8142554 | AASS       | 2.2686915 | up | aminoadipate-semialdehyde synthase                       |
| 8116272 | ADAMTS2    | 2.2680051 | up | ADAM metalloproteinase with thrombospondin type 1 mo     |
| 8162940 | ABCA1      | 2.2674248 | up | ATP-binding cassette, sub-family A (ABC1), member 1      |
| 7927146 | CSGALNACT2 | 2.263632  | up | chondroitin sulfate N-acetylgalactosaminyltransferase 2  |
| 7954631 | MLSTD1     | 2.261788  | up | male sterility domain containing 1                       |
| 8020183 | IMPA2      | 2.2603734 | up | inositol(myo)-1(or 4)-monophosphatase 2                  |
| 7991581 | CHSY1      | 2.2601757 | up | chondroitin sulfate synthase 1                           |
| 8156134 | NTRK2      | 2.260032  | up | neurotrophic tyrosine kinase, receptor, type 2           |
| 8058221 | TRAK2      | 2.2580874 | up | trafficking protein, kinesin binding 2                   |
| 8114536 | TMEM173    | 2.2580316 | up | transmembrane protein 173                                |
| 8108729 | PCDHB11    | 2.2577991 | up | protocadherin beta 11                                    |
| 8028652 | ZFP36      | 2.2577658 | up | zinc finger protein 36, C3H type, homolog (mouse)        |
| 8069668 | CYR1       | 2.2569406 | up | cysteine/tyrosine-rich 1                                 |
| 8061013 | C20orf82   | 2.2550323 | up | chromosome 20 open reading frame 82                      |
| 8106743 | VCAN       | 2.2536616 | up | versican                                                 |
| 8083221 | PBX2       | 2.2509305 | up | pre-B-cell leukemia homeobox 2                           |
| 7938154 | ILK ILK-2  | 2.2479815 | up | integrin-linked kinase   integrin-linked kinase-2        |
| 7952641 | RICS       | 2.2474952 | up | Rho GTPase-activating protein                            |
| 7976816 | SNORD114-3 | 2.245155  | up | small nucleolar RNA, C/D box 114-3                       |
| 7909568 | DTL        | 2.2431705 | up | denticleless homolog (Drosophila)                        |

Supplemental Table 1a  
eMSC vs. eEP

|         |                  |           |    |                                                              |
|---------|------------------|-----------|----|--------------------------------------------------------------|
| 8108693 | PCDHB4           | 2.2402294 | up | protocadherin beta 4                                         |
| 7942135 | TMEM16A          | 2.2381935 | up | transmembrane protein 16A                                    |
| 8057959 | PGAP1            | 2.2380276 | up | post-GPI attachment to proteins 1                            |
| 7985016 | SNX33            | 2.2359664 | up | sorting nexin 33                                             |
| 7906400 | IFI16            | 2.234832  | up | interferon, gamma-inducible protein 16                       |
| 7908694 | NAV1             | 2.2342021 | up | neuron navigator 1                                           |
| 7976826 | SNORD114-26      | 2.2331498 | up | small nucleolar RNA, C/D box 114-26                          |
| 7950473 | ARRB1            | 2.23227   | up | arrestin, beta 1                                             |
| 7971159 | TNAP             | 2.230432  | up | TRAFs and NIK-associated protein                             |
| 8106494 | BHMT2            | 2.2300603 | up | betaine-homocysteine methyltransferase 2                     |
| 8115651 | GABRB2           | 2.2286506 | up | gamma-aminobutyric acid (GABA) A receptor, beta 2            |
| 7973727 | KIAA1305         | 2.226227  | up |                                                              |
| 7957338 | SYT1             | 2.2244172 | up | synaptotagmin I                                              |
| 8114797 | SPRY4            | 2.2244022 | up | sprouty homolog 4 (Drosophila)                               |
| 8091402 | TM4SF18          | 2.2229052 | up | transmembrane 4 L six family member 18                       |
| 7917182 | ELTD1            | 2.21397   | up | EGF, latrophilin and seven transmembrane domain contain      |
| 7971922 | PCDH9            | 2.211669  | up | protocadherin 9                                              |
| 8038347 | TEAD2            | 2.2083998 | up | TEA domain family member 2                                   |
| 7919642 | HIST2H2AB        | 2.2067032 | up | histone cluster 2, H2ab                                      |
| 8117372 | HIST1H2AC        | 2.2065785 | up | histone cluster 1, H2ac                                      |
| 8143040 | SLC35B4          | 2.2037296 | up | solute carrier family 35, member B4                          |
| 8152867 | DDEF1            | 2.2004945 | up | development and differentiation enhancing factor 1           |
| 8095080 | PDGFRA           | 2.1994188 | up | platelet-derived growth factor receptor, alpha polypeptide   |
| 8124385 | HIST1H4B HIST4H4 | 2.1974046 | up | histone cluster 1, H4b   histone cluster 4, H4   histone clu |
| 7979400 | C14orf37         | 2.1943402 | up | chromosome 14 open reading frame 37                          |
| 8112890 | MED27 LOC441089  | 2.1943254 | up | mediator complex subunit 27   CRSP8 pseudogene               |
| 8074168 | FLJ39632         | 2.1930661 | up | hypothetical LOC642477                                       |
| 7982564 | SPRED1           | 2.1908576 | up | sprouty-related, EVH1 domain containing 1                    |
| 8098870 | SPON2            | 2.1906059 | up | spondin 2, extracellular matrix protein                      |
| 8107594 | SNCAIP           | 2.1876748 | up | synuclein, alpha interacting protein (synphilin)             |
| 7931479 | INPP5A           | 2.18727   | up | inositol polyphosphate-5-phosphatase, 40kDa                  |
| 7947230 | BDNF             | 2.1872332 | up | brain-derived neurotrophic factor                            |
| 8021442 | ZNF532           | 2.1870604 | up | zinc finger protein 532                                      |

Supplemental Table 1a  
eMSC vs. eEP

|         |              |           |    |                                                              |
|---------|--------------|-----------|----|--------------------------------------------------------------|
| 7907079 | RCSD1        | 2.183021  | up | RCSD domain containing 1                                     |
| 7954312 | SLCO1C1      | 2.1803222 | up | solute carrier organic anion transporter family, member 1    |
| 8102482 | SEC24D       | 2.1793907 | up | SEC24 related gene family, member D ( <i>S. cerevisiae</i> ) |
| 8138527 | MGC87042     | 2.177809  | up | similar to Six transmembrane epithelial antigen of prostat   |
| 8124040 | ATXN1        | 2.1754553 | up | ataxin 1                                                     |
| 8167125 | USP11        | 2.1746001 | up | ubiquitin specific peptidase 11                              |
| 8083240 | AGTR1        | 2.1725905 | up | angiotensin II receptor, type 1                              |
| 7977452 | FLJ39632     | 2.1710541 | up | hypothetical LOC642477                                       |
| 8127854 | ME1          | 2.1698456 | up | malic enzyme 1, NADP(+)-dependent, cytosolic                 |
| 8167965 | MSN          | 2.168824  | up | moesin                                                       |
| 8108688 | PCDHB3       | 2.1676881 | up | protocadherin beta 3                                         |
| 8020090 | TWSG1        | 2.166591  | up | twisted gastrulation homolog 1 ( <i>Drosophila</i> )         |
| 7946401 | ST5          | 2.1652663 | up | suppression of tumorigenicity 5                              |
| 7945132 | FLI1 EWSR1   | 2.163173  | up | Friend leukemia virus integration 1   Ewing sarcoma brea     |
| 8138735 | HOXA5        | 2.1607187 | up | homeobox A5                                                  |
| 8148448 | KHDRBS3      | 2.1566188 | up | KH domain containing, RNA binding, signal transduction a     |
| 8133459 | CLIP2        | 2.155802  | up | CAP-GLY domain containing linker protein 2                   |
| 7972021 | TBC1D4       | 2.1540914 | up | TBC1 domain family, member 4                                 |
| 8059470 | IRS1         | 2.153985  | up | insulin receptor substrate 1                                 |
| 8043909 | NPAS2        | 2.1533518 | up | neuronal PAS domain protein 2                                |
| 7930194 | CNNM2        | 2.152243  | up | cyclin M2                                                    |
| 7936242 | KIAA1754     | 2.151906  | up |                                                              |
| 8109528 | CYFIP2       | 2.150678  | up | cytoplasmic FMR1 interacting protein 2                       |
| 7952243 | C1QTNF5 MFRP | 2.1494782 | up | C1q and tumor necrosis factor related protein 5   membr      |
| 8000574 | NUPR1        | 2.1487586 | up | nuclear protein 1                                            |
| 8161648 | KLF9         | 2.148386  | up | Kruppel-like factor 9                                        |
| 8160718 | PTENP1       | 2.1472297 | up | phosphatase and tensin homolog (mutated in multiple ad       |
| 7947681 | ARHGAP1      | 2.1408312 | up | Rho GTPase activating protein 1                              |
| 8091723 | RARRES1      | 2.1404169 | up | retinoic acid receptor responder (tazarotene induced) 1      |
| 8171205 | NLGN4X       | 2.1393178 | up | neuroligin 4, X-linked                                       |
| 8117377 | HIST1H1E     | 2.1390915 | up | histone cluster 1, H1e                                       |
| 8101788 | UNC5C        | 2.1331258 | up | unc-5 homolog C ( <i>C. elegans</i> )                        |
| 7950906 | CTSC         | 2.132616  | up | cathepsin C                                                  |

Supplemental Table 1a  
eMSC vs. eEP

|         |                  |           |    |                                                                                   |
|---------|------------------|-----------|----|-----------------------------------------------------------------------------------|
| 7953385 | GAPDH            | 2.13124   | up | glyceraldehyde-3-phosphate dehydrogenase                                          |
| 8172395 | SSX10 LOC1001306 | 2.1301937 | up | synovial sarcoma, X breakpoint 10   similar to Synovial sarcoma                   |
| 7932584 | PRTFDC1          | 2.1297908 | up | phosphoribosyl transferase domain containing 1                                    |
| 8166289 | CDKL5            | 2.1293948 | up | cyclin-dependent kinase-like 5                                                    |
| 8052798 | AAK1             | 2.127706  | up | AP2 associated kinase 1                                                           |
| 8122038 | TMEM200A         | 2.123317  | up | transmembrane protein 200A                                                        |
| 8117422 | HIST1H4F HIST4H4 | 2.1221716 | up | histone cluster 1, H4f   histone cluster 4, H4   histone cluster 4                |
| 7990643 | LINGO1           | 2.1209245 | up | leucine rich repeat and Ig domain containing 1                                    |
| 8144378 | AGPAT5           | 2.119403  | up | 1-acylglycerol-3-phosphate O-acyltransferase 5 (lysophosphatidyl acyltransferase) |
| 7990636 | C15orf5          | 2.1138425 | up | chromosome 15 open reading frame 5                                                |
| 7964579 | CTDSP2           | 2.113458  | up | CTD (carboxy-terminal domain, RNA polymerase II, polypeptide domain 2)            |
| 7959827 | TMEM132C         | 2.1128197 | up | transmembrane protein 132C                                                        |
| 8108683 | PCDHB2           | 2.1125488 | up | protocadherin beta 2                                                              |
| 7919305 | PRKAB2           | 2.11197   | up | protein kinase, AMP-activated, beta 2 non-catalytic subunit                       |
| 8133233 | AUTS2            | 2.1116865 | up | autism susceptibility candidate 2                                                 |
| 8006779 | ARHGAP23         | 2.1109715 | up | Rho GTPase activating protein 23                                                  |
| 7908041 | LAMC1            | 2.1096928 | up | laminin, gamma 1 (formerly LAMB2)                                                 |
| 8050537 | MATN3            | 2.1061661 | up | matrilin 3                                                                        |
| 8108737 | PCDHB13          | 2.1055374 | up | protocadherin beta 13                                                             |
| 8139131 | AMPH             | 2.1038563 | up | amphiphysin                                                                       |
| 8032730 | EEF2             | 2.1021197 | up | eukaryotic translation elongation factor 2                                        |
| 8048205 | IGFBP2           | 2.100066  | up | insulin-like growth factor binding protein 2, 36kDa                               |
| 8121319 | SOBP             | 2.0995567 | up | sine oculis binding protein homolog (Drosophila)                                  |
| 7980044 | PNMA1            | 2.097834  | up | paraneoplastic antigen MA1                                                        |
| 8103260 | DCHS2            | 2.0960276 | up | dachsous 2 (Drosophila)                                                           |
| 8125360 | PBX2             | 2.0939653 | up | pre-B-cell leukemia homeobox 2                                                    |
| 7901140 | MAST2            | 2.0934813 | up | microtubule associated serine/threonine kinase 2                                  |
| 7976812 | SNORD113-4       | 2.092533  | up | small nucleolar RNA, C/D box 113-4                                                |
| 7949496 | CFL1             | 2.09113   | up | cofilin 1 (non-muscle)                                                            |
| 8165911 | TBL1X            | 2.0903933 | up | transducin (beta)-like 1X-linked                                                  |
| 7936028 | ACTR1A           | 2.0901902 | up | ARP1 actin-related protein 1 homolog A, centractin alpha                          |
| 8157804 | OLFML2A          | 2.0889802 | up | olfactomedin-like 2A                                                              |
| 8102050 | NHEDC2           | 2.0873578 | up | Na <sup>+</sup> /H <sup>+</sup> exchanger domain containing 2                     |



Supplemental Table 1a  
eMSC vs. eEP

|         |                 |           |    |                                                             |
|---------|-----------------|-----------|----|-------------------------------------------------------------|
| 8154381 | C9orf150        | 2.0861585 | up | chromosome 9 open reading frame 150                         |
| 7903742 | GSTM4 GSTM2     | 2.0860245 | up | glutathione S-transferase M4   glutathione S-transferase I  |
| 8106350 | NBLA11895       | 2.0832043 | up | putative protein product of Nbla11895                       |
| 8079037 | TRAK1           | 2.081213  | up | trafficking protein, kinesin binding 1                      |
| 8171313 | ARHGAP6         | 2.078208  | up | Rho GTPase activating protein 6                             |
| 7995206 | TGFB111         | 2.076156  | up | transforming growth factor beta 1 induced transcript 1      |
| 8178598 | CLIC1           | 2.0742028 | up | chloride intracellular channel 1                            |
| 8008969 | TBX2            | 2.0710258 | up | T-box 2                                                     |
| 7954899 | CNTN1           | 2.0693629 | up | contactin 1                                                 |
| 7909027 | NFASC           | 2.06904   | up | neurofascin homolog (chicken)                               |
| 7975095 | PLEKHG3         | 2.067427  | up | pleckstrin homology domain containing, family G (with Rh    |
| 8179827 | CLIC1           | 2.0671172 | up | chloride intracellular channel 1                            |
| 8075462 | SELM            | 2.0616798 | up | selenoprotein M                                             |
| 8112803 | LHFPL2          | 2.06073   | up | lipoma HMGIC fusion partner-like 2                          |
| 8001099 | HERC2P4         | 2.0595734 | up | hect domain and RLD 2 pseudogene 4                          |
| 8033233 | TUBB4           | 2.0583463 | up | tubulin, beta 4                                             |
| 8141459 | GAL3ST4         | 2.0575926 | up | galactose-3-O-sulfotransferase 4                            |
| 8164252 | SH2D3C          | 2.0542502 | up | SH2 domain containing 3C                                    |
| 8086125 | LBA1            | 2.0531929 | up | lupus brain antigen 1                                       |
| 7956261 | RBMS2           | 2.0523272 | up | RNA binding motif, single stranded interacting protein 2    |
| 7945245 | HNT             | 2.0521615 | up | neurotrimin                                                 |
| 8041940 | STON1-GTF2A1L   | 2.0520117 | up |                                                             |
| 8104378 | POLS            | 2.051119  | up | polymerase (DNA directed) sigma                             |
| 7902913 | CDC7            | 2.0508406 | up | cell division cycle 7 homolog ( <i>S. cerevisiae</i> )      |
| 8046048 | FAM130A2        | 2.048722  | up | family with sequence similarity 130, member A2              |
| 7908732 | IPO9            | 2.0476744 | up | importin 9                                                  |
| 8094778 | UCHL1           | 2.0476468 | up | ubiquitin carboxyl-terminal esterase L1 (ubiquitin thiolest |
| 7932227 | NMT2            | 2.047371  | up | N-myristoyltransferase 2                                    |
| 8169473 | PLS3            | 2.0473535 | up | plastin 3 (T isoform)                                       |
| 8153449 | EEF1D           | 2.0472808 | up | eukaryotic translation elongation factor 1 delta (guanine r |
| 8169073 | MGC39900 H2BFXI | 2.0470636 | up | thymosin beta15b   H2B histone family, member X, pseud      |
| 8002152 | SLC12A4         | 2.0460188 | up | solute carrier family 12 (potassium/chloride transporters)  |
| 7905754 | ATP8B2          | 2.0458088 | up | ATPase, class I, type 8B, member 2                          |

Supplemental Table 1a  
eMSC vs. eEP

|         |             |           |    |                                                          |
|---------|-------------|-----------|----|----------------------------------------------------------|
| 8138602 | DFNA5       | 2.045554  | up | deafness, autosomal dominant 5                           |
| 7916843 | GNG12       | 2.0451083 | up | guanine nucleotide binding protein (G protein), gamma 12 |
| 8076241 | MKL1        | 2.0450447 | up | megakaryoblastic leukemia (translocation) 1              |
| 8133818 | PHTF2       | 2.0438805 | up | putative homeodomain transcription factor 2              |
| 8083223 | C3orf58     | 2.0434024 | up | chromosome 3 open reading frame 58                       |
| 8014706 | PCGF2       | 2.042617  | up | polycomb group ring finger 2                             |
| 8027778 | FXYD5       | 2.0406787 | up | FXYD domain containing ion transport regulator 5         |
| 7999468 | LITAF       | 2.0405264 | up | lipopolysaccharide-induced TNF factor                    |
| 7943263 | AMOTL1      | 2.0396068 | up | angiomin like 1                                          |
| 8005132 | MEIS3P1     | 2.0388978 | up | Meis homeobox 3 pseudogene 1                             |
| 8102587 | C4orf31     | 2.0371604 | up | chromosome 4 open reading frame 31                       |
| 8167006 | RP2         | 2.0362115 | up | retinitis pigmentosa 2 (X-linked recessive)              |
| 8113433 | EFNA5       | 2.035831  | up | ephrin-A5                                                |
| 7993310 | MKL2        | 2.035347  | up | MKL/myocardin-like 2                                     |
| 8124430 | HIST1H1D    | 2.0344305 | up | histone cluster 1, H1d                                   |
| 8001133 | SHCBP1      | 2.034085  | up | SHC SH2-domain binding protein 1                         |
| 7985809 | ABHD2       | 2.0333686 | up | abhydrolase domain containing 2                          |
| 8132439 | C7orf10     | 2.0331867 | up | chromosome 7 open reading frame 10                       |
| 7930927 | INPP5F      | 2.0325382 | up | inositol polyphosphate-5-phosphatase F                   |
| 8052735 | CNRIP1      | 2.0297089 | up | cannabinoid receptor interacting protein 1               |
| 8145151 | SORBS3      | 2.026915  | up | sorbin and SH3 domain containing 3                       |
| 8105348 | LOC493869   | 2.0267737 | up | similar to RIKEN cDNA 2310016C16                         |
| 7995783 | MT2A        | 2.025912  | up | metallothionein 2A                                       |
| 8035465 | ISYNA1      | 2.022044  | up | myo-inositol 1-phosphate synthase A1                     |
| 7968516 | PDS5B       | 2.0217423 | up | PDS5, regulator of cohesion maintenance, homolog B (S. c |
| 8021286 | C18orf54    | 2.0207999 | up | chromosome 18 open reading frame 54                      |
| 8115196 | ZNF300      | 2.020634  | up | zinc finger protein 300                                  |
| 8125059 | CLIC1       | 2.0186634 | up | chloride intracellular channel 1                         |
| 8008588 | HLF         | 2.0185475 | up | hepatic leukemia factor                                  |
| 7948612 | FADS1 FADS3 | 2.0185268 | up | fatty acid desaturase 1   fatty acid desaturase 3        |
| 8040927 | NRBP1       | 2.0179093 | up | nuclear receptor binding protein 1                       |
| 7916747 | JAK1        | 2.017865  | up | Janus kinase 1 (a protein tyrosine kinase)               |
| 8064415 | C20orf46    | 2.0156214 | up | chromosome 20 open reading frame 46                      |

Supplemental Table 1a  
eMSC vs. eEP

|         |                |           |    |                                                              |
|---------|----------------|-----------|----|--------------------------------------------------------------|
| 7964388 | NDUFA4L2       | 2.0149097 | up | NADH dehydrogenase (ubiquinone) 1 alpha subcomplex, 4        |
| 8116051 | DBN1           | 2.0144134 | up | drebrin 1                                                    |
| 8113491 | STARD4         | 2.0112624 | up | StAR-related lipid transfer (START) domain containing 4      |
| 7933872 | EGR2           | 2.0110977 | up | early growth response 2 (Krox-20 homolog, Drosophila)        |
| 8179819 | DDAH2          | 2.0098245 | up | dimethylarginine dimethylaminohydrolase 2                    |
| 7934690 | C10orf56       | 2.0083141 | up | chromosome 10 open reading frame 56                          |
| 7915147 | FHL3           | 2.0082026 | up | four and a half LIM domains 3                                |
| 8156897 | C9orf30 TMEFF1 | 2.005747  | up | chromosome 9 open reading frame 30   transmembrane           |
| 8178590 | DDAH2          | 2.002057  | up | dimethylarginine dimethylaminohydrolase 2                    |
| 7966202 | KCTD10         | 2.0018244 | up | potassium channel tetramerisation domain containing 10       |
| 8001067 | HERC2P4        | 1.9980351 | up | hect domain and RLD 2 pseudogene 4                           |
| 7899939 | GJA4           | 1.9951727 | up | gap junction protein, alpha 4, 37kDa                         |
| 8176174 | MPP1           | 1.9920744 | up | membrane protein, palmitoylated 1, 55kDa                     |
| 8108744 | PCDHB14        | 1.9913814 | up | protocadherin beta 14                                        |
| 7964522 | CDK4           | 1.989845  | up | cyclin-dependent kinase 4                                    |
| 8082965 | MRAS           | 1.9889873 | up | muscle RAS oncogene homolog                                  |
| 7984813 | ISLR           | 1.9886656 | up | immunoglobulin superfamily containing leucine-rich repeats   |
| 8172043 | SRPX           | 1.9872857 | up | sushi-repeat-containing protein, X-linked                    |
| 8028656 | PLEKHG2        | 1.9860514 | up | pleckstrin homology domain containing, family G (with Rho)   |
| 8034151 | DOCK6          | 1.9825404 | up | dedicator of cytokinesis 6                                   |
| 7996908 | SNTB2          | 1.9821875 | up | syntrophin, beta 2 (dystrophin-associated protein A1, 59kDa) |
| 8112045 | ESM1           | 1.9806007 | up | endothelial cell-specific molecule 1                         |
| 8046461 | ZAK            | 1.979665  | up | sterile alpha motif and leucine zipper containing kinase A2  |
| 8072678 | HMOX1          | 1.9783366 | up | heme oxygenase (decycling) 1                                 |
| 7908597 | NR5A2          | 1.9776566 | up | nuclear receptor subfamily 5, group A, member 2              |
| 7913558 | LUZP1          | 1.9755799 | up | leucine zipper protein 1                                     |
| 8155754 | MAMDC2         | 1.9712187 | up | MAM domain containing 2                                      |
| 7975889 | VASH1          | 1.9681243 | up | vasohibin 1                                                  |
| 8147469 | PGCP           | 1.9664088 | up | plasma glutamate carboxypeptidase                            |
| 8157691 | LOC729012      | 1.9630181 | up | similar to Spindle and kinetochore-associated protein 2 (P)  |
| 7965979 | ALDH1L2        | 1.962587  | up | aldehyde dehydrogenase 1 family, member L2                   |
| 8068100 | C21orf109      | 1.9611108 | up | chromosome 21 open reading frame 109                         |
| 8163257 | LPAR1          | 1.9583222 | up | lysophosphatidic acid receptor 1                             |

Supplemental Table 1a  
eMSC vs. eEP

|         |               |           |    |                                                          |
|---------|---------------|-----------|----|----------------------------------------------------------|
| 7954469 | RASSF8        | 1.9504704 | up | Ras association (RalGDS/AF-6) domain family (N-terminal) |
| 8078350 | TGFBR2        | 1.9496756 | up | transforming growth factor, beta receptor II (70/80kDa)  |
| 7921487 | TAGLN2        | 1.9488231 | up | transgelin 2                                             |
| 8146533 | FAM110B       | 1.9468471 | up | family with sequence similarity 110, member B            |
| 8138553 | FAM126A       | 1.9453398 | up | family with sequence similarity 126, member A            |
| 7951593 | FLJ45803      | 1.9413723 | up |                                                          |
| 8083494 | MME           | 1.9398677 | up | membrane metallo-endopeptidase                           |
| 8151931 | TSPYL5        | 1.9366993 | up | TSPY-like 5                                              |
| 8122637 | SASH1         | 1.9342699 | up | SAM and SH3 domain containing 1                          |
| 8089145 | ABI3BP        | 1.9332203 | up | ABI gene family, member 3 (NESH) binding protein         |
| 7950885 | FZD4          | 1.9325318 | up | frizzled homolog 4 (Drosophila)                          |
| 7968556 | KL            | 1.9321364 | up | klotho                                                   |
| 7983145 | STARD9        | 1.9303311 | up | StAR-related lipid transfer (START) domain containing 9  |
| 8055220 | A26C1A A26C1B | 1.9259634 | up | ANKRD26-like family C, member 1A   ANKRD26-like family   |
| 8095362 | MT2A          | 1.9224522 | up | metallothionein 2A                                       |
| 8088848 | PDZRN3        | 1.9221985 | up | PDZ domain containing RING finger 3                      |
| 8122099 | ENPP1         | 1.9162196 | up | ectonucleotide pyrophosphatase/phosphodiesterase 1       |
| 7963328 | FIGNL2        | 1.9130845 | up | fidgetin-like 2                                          |
| 8120043 | RUNX2         | 1.9128208 | up | runt-related transcription factor 2                      |
| 8065359 | CD93          | 1.9114141 | up |                                                          |
| 8176234 | CLIC2         | 1.9114133 | up | chloride intracellular channel 2                         |
| 8079140 | SNRK          | 1.9104977 | up | SNF related kinase                                       |
| 8113641 | CDO1          | 1.9100168 | up | cysteine dioxygenase, type I                             |
| 8015590 | STAT5B        | 1.9086711 | up | signal transducer and activator of transcription 5B      |
| 7950671 | GAB2          | 1.9083521 | up | GRB2-associated binding protein 2                        |
| 8123651 | TUBB2B        | 1.9076422 | up | tubulin, beta 2B                                         |
| 8019765 | ARHGDI A      | 1.9047431 | up | Rho GDP dissociation inhibitor (GDI) alpha               |
| 8083677 | SCHIP1        | 1.9027995 | up | schwannomin interacting protein 1                        |
| 8058390 | RAPH1         | 1.9027957 | up | Ras association (RalGDS/AF-6) and pleckstrin homology dc |
| 8049317 | DGKD          | 1.8988801 | up | diacylglycerol kinase, delta 130kDa                      |
| 7949948 | C11orf24      | 1.8975497 | up | chromosome 11 open reading frame 24                      |
| 8069178 | ADARB1        | 1.8974665 | up | adenosine deaminase, RNA-specific, B1 (RED1 homolog ra   |
| 7951910 | BACE1         | 1.8970939 | up | beta-site APP-cleaving enzyme 1                          |

Supplemental Table 1a  
eMSC vs. eEP

|         |                   |           |    |                                                              |
|---------|-------------------|-----------|----|--------------------------------------------------------------|
| 8101957 | EMCN              | 1.8969392 | up | endomucin                                                    |
| 8153021 | ST3GAL1           | 1.8963989 | up | ST3 beta-galactoside alpha-2,3-sialyltransferase 1           |
| 7917649 | TGFBR3            | 1.8960412 | up | transforming growth factor, beta receptor III                |
| 7962842 | ADCY6             | 1.894808  | up | adenylate cyclase 6                                          |
| 8129254 | MAN1A1            | 1.8945558 | up | mannosidase, alpha, class 1A, member 1                       |
| 7919340 | GJA5              | 1.8927954 | up | gap junction protein, alpha 5, 40kDa                         |
| 8025672 | SLC44A2           | 1.8915197 | up | solute carrier family 44, member 2                           |
| 8124531 | HIST1H3I HIST1H2E | 1.8875171 | up | histone cluster 1, H3i   histone cluster 1, H2bn   histone c |
| 8009417 | KPNA2 LOC728860   | 1.8858365 | up | karyopherin alpha 2 (RAG cohort 1, importin alpha 1)   ka    |
| 8089714 | LSAMP             | 1.8832543 | up | limbic system-associated membrane protein                    |
| 8108703 | PCDHB6            | 1.8789738 | up | protocadherin beta 6                                         |
| 7962312 | ABCD2             | 1.8774362 | up | ATP-binding cassette, sub-family D (ALD), member 2           |
| 7951535 | KDEL2             | 1.8764759 | up | KDEL (Lys-Asp-Glu-Leu) containing 2                          |
| 7966026 | NUAK1             | 1.875565  | up | NUAK family, SNF1-like kinase, 1                             |
| 8010161 | 9-Sep             | 1.8753836 | up | septin 9                                                     |
| 7980616 | PTPN21            | 1.8721005 | up | protein tyrosine phosphatase, non-receptor type 21           |
| 8161892 | GNA14             | 1.866386  | up | guanine nucleotide binding protein (G protein), alpha 14     |
| 8045889 | TANC1             | 1.8657202 | up | tetratricopeptide repeat, ankyrin repeat and coiled-coil cc  |
| 7903753 | GSTM2             | 1.8653978 | up | glutathione S-transferase M2 (muscle)                        |
| 8099685 | LGI2              | 1.8652658 | up | leucine-rich repeat LGI family, member 2                     |
| 8041447 | CRIM1             | 1.8642153 | up | cysteine rich transmembrane BMP regulator 1 (chordin-lik     |
| 8019737 | KPNA2 LOC728860   | 1.8585296 | up | karyopherin alpha 2 (RAG cohort 1, importin alpha 1)   ka    |
| 8068105 | BACH1             | 1.8583072 | up | BTB and CNC homology 1, basic leucine zipper transcriptic    |
| 8028524 | ACTN4             | 1.8579627 | up | actinin, alpha 4                                             |
| 8167027 | RGN               | 1.8567643 | up | regucalcin (senescence marker protein-30)                    |
| 8108733 | PCDHB12           | 1.8564553 | up | protocadherin beta 12                                        |
| 8104506 | TRIO LOC10013174  | 1.8544658 | up | triple functional domain (PTPRF interacting)   hypothetica   |
| 8030049 | PSCD2             | 1.8523223 | up | pleckstrin homology, Sec7 and coiled-coil domains 2 (cyto    |
| 8158183 | DNM1              | 1.8514068 | up | dynamain 1                                                   |
| 8060850 | BMP2              | 1.8494145 | up | bone morphogenetic protein 2                                 |
| 8113914 | FNIP1 RAPGEF6     | 1.8486491 | up | folliculin interacting protein 1   Rap guanine nucleotide e  |
| 8083075 | ACPL2             | 1.8457488 | up | acid phosphatase-like 2                                      |
| 7986428 | LOC400464         | 1.8443731 | up | similar to FLJ43276 protein                                  |

Supplemental Table 1a  
eMSC vs. eEP

|         |                  |           |    |                                                              |
|---------|------------------|-----------|----|--------------------------------------------------------------|
| 7901479 | ZYG11B           | 1.844004  | up | zyg-11 homolog B (C. elegans)                                |
| 8167887 | MAGEH1           | 1.838933  | up | melanoma antigen family H, 1                                 |
| 7990054 | UACA             | 1.8364694 | up | uveal autoantigen with coiled-coil domains and ankyrin re    |
| 8100578 | EPHA5            | 1.829849  | up | EPH receptor A5                                              |
| 8095376 | TMPRSS11E2 MT2/  | 1.8298099 | up | transmembrane protease, serine 11E2   metallothionein 2      |
| 8167957 | ZC3H12B          | 1.8297768 | up | zinc finger CCCH-type containing 12B                         |
| 7969736 | FARP1            | 1.8254262 | up | FERM, RhoGEF (ARHGEF) and pleckstrin domain protein 1        |
| 8088491 | CADPS            | 1.8242335 | up | Ca2+-dependent secretion activator                           |
| 7929052 | IFIT3            | 1.8239229 | up | interferon-induced protein with tetratricopeptide repeats    |
| 7899153 | SH3BGL3          | 1.8238728 | up | SH3 domain binding glutamic acid-rich protein like 3         |
| 7909681 | PROX1            | 1.823455  | up | prospero homeobox 1                                          |
| 8157092 | TMEM38B          | 1.8234142 | up | transmembrane protein 38B                                    |
| 8127094 | GSTA4            | 1.8214103 | up | glutathione S-transferase A4                                 |
| 8019263 | ARHGDI1          | 1.8193443 | up | Rho GDP dissociation inhibitor (GDI) alpha                   |
| 7975121 | FNTB             | 1.8182924 | up | farnesyltransferase, CAAX box, beta                          |
| 8169145 | MUM1L1           | 1.817203  | up | melanoma associated antigen (mutated) 1-like 1               |
| 8156783 | COL15A1          | 1.8167652 | up | collagen, type XV, alpha 1                                   |
| 8096675 | TET2             | 1.8164865 | up | tet oncogene family member 2                                 |
| 8143772 | RARRES2          | 1.8093233 | up | retinoic acid receptor responder (tazarotene induced) 2      |
| 7969665 | HS6ST3 LOC100134 | 1.8080257 | up | heparan sulfate 6-O-sulfotransferase 3   similar to hepara   |
| 8037835 | SLC1A5           | 1.806645  | up | solute carrier family 1 (neutral amino acid transporter), m  |
| 8168146 | KIF4A            | 1.8037452 | up | kinesin family member 4A                                     |
| 7928630 | EIF5AL1          | 1.8023704 | up | eukaryotic translation initiation factor 5A-like 1   eukaryo |
| 8174654 | KLHL13           | 1.8021806 | up | kelch-like 13 (Drosophila)                                   |
| 8097717 | ARHGAP10         | 1.8021526 | up | Rho GTPase activating protein 10                             |
| 8048995 | ITM2C            | 1.7943691 | up | integral membrane protein 2C                                 |
| 8111255 | CDH10            | 1.7887635 | up | cadherin 10, type 2 (T2-cadherin)                            |
| 8078262 | UBE2E1           | 1.7886469 | up | ubiquitin-conjugating enzyme E2E 1 (UBC4/5 homolog, ye       |
| 8088550 | PRICKLE2         | 1.7872906 | up | prickle homolog 2 (Drosophila)                               |
| 7979671 | MAX              | 1.7871692 | up | MYC associated factor X                                      |
| 8101723 | NAP1L5           | 1.7823602 | up | nucleosome assembly protein 1-like 5                         |
| 8091306 | PLSCR4           | 1.7819209 | up | phospholipid scramblase 4                                    |
| 8066431 | ADA              | 1.779839  | up | adenosine deaminase                                          |

Supplemental Table 1a  
eMSC vs. eEP

|         |           |           |    |                                                              |
|---------|-----------|-----------|----|--------------------------------------------------------------|
| 7901460 | GPX7      | 1.7796448 | up | glutathione peroxidase 7                                     |
| 7908125 | RGL1      | 1.7757717 | up | ral guanine nucleotide dissociation stimulator-like 1        |
| 7957260 | GLIPR1    | 1.7722119 | up | GLI pathogenesis-related 1 (glioma)                          |
| 8108708 | PCDHB7    | 1.76854   | up | protocadherin beta 7                                         |
| 7899043 | SEPN1     | 1.7664998 | up | selenoprotein N, 1                                           |
| 8041763 | PRKCE     | 1.7662565 | up | protein kinase C, epsilon                                    |
| 8019183 | ACTG1     | 1.7661406 | up | actin, gamma 1                                               |
| 7978391 | NOVA1     | 1.7643582 | up | neuro-oncological ventral antigen 1                          |
| 7931951 | SFMBT2    | 1.7635555 | up | Scm-like with four mbt domains 2                             |
| 8046020 | SCN2A     | 1.763358  | up | sodium channel, voltage-gated, type II, alpha subunit        |
| 8131179 | TTYH3     | 1.7625461 | up | tweety homolog 3 (Drosophila)                                |
| 7958749 | SH2B3     | 1.7612516 | up | SH2B adaptor protein 3                                       |
| 8079950 | GNAI2     | 1.7609924 | up | guanine nucleotide binding protein (G protein), alpha inhi   |
| 8017927 | ABCA9     | 1.7605617 | up | ATP-binding cassette, sub-family A (ABC1), member 9          |
| 7999909 | GPRC5B    | 1.7603022 | up | G protein-coupled receptor, family C, group 5, member B      |
| 8157524 | TLR4      | 1.7595776 | up | toll-like receptor 4                                         |
| 7932132 | FRMD4A    | 1.7586479 | up | FERM domain containing 4A                                    |
| 7934753 | EIF5AL1   | 1.7579147 | up | eukaryotic translation initiation factor 5A-like 1   eukaryo |
| 8006736 | DUSP14    | 1.7565751 | up | dual specificity phosphatase 14                              |
| 7996677 | NUTF2     | 1.7562217 | up | nuclear transport factor 2                                   |
| 8013341 | MFAP4     | 1.7558458 | up | microfibrillar-associated protein 4                          |
| 7978718 | SEC23A    | 1.7514216 | up | Sec23 homolog A ( <i>S. cerevisiae</i> )                     |
| 7928600 | EIF5AL1   | 1.7512413 | up | eukaryotic translation initiation factor 5A-like 1   eukaryo |
| 7954090 | EMP1      | 1.7511474 | up | epithelial membrane protein 1                                |
| 8091546 | LOC645843 | 1.7511286 | up | transmembrane protein 14-like                                |
| 8173647 | ZDHHC15   | 1.73923   | up | zinc finger, DHHC-type containing 15                         |
| 7999598 | NTAN1     | 1.7390002 | up | N-terminal asparagine amidase                                |
| 8066716 | ELMO2     | 1.735086  | up | engulfment and cell motility 2                               |
| 8154254 | KIAA1432  | 1.7350814 | up |                                                              |
| 7958158 | HCFC2     | 1.7332212 | up | host cell factor C2                                          |
| 8092073 | EIF5A2    | 1.7319684 | up | eukaryotic translation initiation factor 5A2                 |
| 7927681 | BICC1     | 1.7305931 | up | bicaudal C homolog 1 ( <i>Drosophila</i> )                   |
| 8174235 | TCEAL5    | 1.7287912 | up | transcription elongation factor A (SII)-like 5               |

Supplemental Table 1a  
eMSC vs. eEP

|         |              |           |    |                                                              |
|---------|--------------|-----------|----|--------------------------------------------------------------|
| 8133983 | ADAM22       | 1.7276335 | up | ADAM metallopeptidase domain 22                              |
| 8081375 | FAM55C       | 1.7271112 | up | family with sequence similarity 55, member C                 |
| 8037847 | AP2S1        | 1.7257938 | up | adaptor-related protein complex 2, sigma 1 subunit           |
| 8136248 | MEST         | 1.724375  | up | mesoderm specific transcript homolog (mouse)                 |
| 8106336 | SV2C         | 1.7241048 | up | synaptic vesicle glycoprotein 2C                             |
| 7972055 | KCTD12       | 1.7219536 | up | potassium channel tetramerisation domain containing 12       |
| 8055606 | GTDC1        | 1.7206812 | up | glycosyltransferase-like domain containing 1                 |
| 8122634 | SAMD5        | 1.7200437 | up | sterile alpha motif domain containing 5                      |
| 8158317 | SPTAN1       | 1.7186323 | up | spectrin, alpha, non-erythrocytic 1 (alpha-fodrin)           |
| 7950838 | PICALM       | 1.7142308 | up | phosphatidylinositol binding clathrin assembly protein       |
| 8119088 | CDKN1A       | 1.7137842 | up | cyclin-dependent kinase inhibitor 1A (p21, Cip1)             |
| 7960464 | VWF          | 1.7135745 | up | von Willebrand factor                                        |
| 8014974 | TOP2A        | 1.7118134 | up | topoisomerase (DNA) II alpha 170kDa                          |
| 8162531 | MT1G         | 1.7112588 | up | metallothionein 1G                                           |
| 8147837 | ZFPM2        | 1.7109922 | up | zinc finger protein, multitype 2                             |
| 8065248 | LOC100130264 | 1.7109283 | up | similar to hCG2038397                                        |
| 7904000 | DDX20        | 1.7095873 | up | DEAD (Asp-Glu-Ala-Asp) box polypeptide 20                    |
| 7965064 | OSBPL8       | 1.7065396 | up | oxysterol binding protein-like 8                             |
| 7923824 | SLC41A1      | 1.7059621 | up | solute carrier family 41, member 1                           |
| 7951077 | SESN3        | 1.7040606 | up | sestrin 3                                                    |
| 8157105 | ZNF462       | 1.7039714 | up | zinc finger protein 462                                      |
| 7957386 | ACSS3        | 1.7024195 | up | acyl-CoA synthetase short-chain family member 3              |
| 7957665 | ELK3         | 1.7024115 | up |                                                              |
| 8160168 | FREM1        | 1.7006812 | up | FRAS1 related extracellular matrix 1                         |
| 8169350 | LOC100134364 | 1.7002672 | up |                                                              |
| 7945573 | POLR2L       | 1.699539  | up | polymerase (RNA) II (DNA directed) polypeptide L, 7.6kDa     |
| 8045587 | ACVR2A       | 1.6985806 | up | activin A receptor, type IIA                                 |
| 8111677 | LIFR         | 1.6972455 | up | leukemia inhibitory factor receptor alpha                    |
| 8108238 | SMAD5        | 1.6963887 | up | SMAD family member 5                                         |
| 7938231 | PPFIBP2      | 1.6962452 | up | PTPRF interacting protein, binding protein 2 (liprin beta 2) |
| 8051547 | PRKD3        | 1.693513  | up | protein kinase D3                                            |
| 8019912 | EMILIN2      | 1.6928838 | up | elastin microfibril interfacier 2                            |
| 8113358 | ST8SIA4      | 1.6898153 | up | ST8 alpha-N-acetyl-neuraminide alpha-2,8-sialyltransferas    |



Supplemental Table 1a  
eMSC vs. eEP

|         |                 |           |    |                                                              |
|---------|-----------------|-----------|----|--------------------------------------------------------------|
| 8104746 | NPR3            | 1.6879762 | up | natriuretic peptide receptor C/guanylate cyclase C (atrion   |
| 7946579 | LYVE1           | 1.6879586 | up | lymphatic vessel endothelial hyaluronan receptor 1           |
| 7916862 | GPR177          | 1.6868939 | up | G protein-coupled receptor 177                               |
| 7986569 | LOC283755 HERC2 | 1.684206  | up | hypothetical protein LOC283755   hect domain and RLD 2       |
| 7996772 | SLC7A6 TRPV6    | 1.6840407 | up | solute carrier family 7 (cationic amino acid transporter, y+ |
| 7962327 | SLC2A13         | 1.6829946 | up | solute carrier family 2 (facilitated glucose transporter), m |
| 8170390 | IDS LOC727913   | 1.680294  | up | iduronate 2-sulfatase (Hunter syndrome)   similar to idurc   |
| 8042211 | B3GNT2          | 1.679966  | up | UDP-GlcNAc:betaGal beta-1,3-N-acetylglucosaminyltransf       |
| 8073775 | FBLN1           | 1.6787312 | up | fibulin 1                                                    |
| 7991406 | PRC1            | 1.6764103 | up | protein regulator of cytokinesis 1                           |
| 8003171 | COTL1           | 1.6754365 | up | coactosin-like 1 (Dictyostelium)                             |
| 8066905 | ZNFX1           | 1.6738375 | up | zinc finger, NFX1-type containing 1                          |
| 8078650 | CTDSPL          | 1.6735886 | up | CTD (carboxy-terminal domain, RNA polymerase II, polype      |
| 7958346 | C12orf23        | 1.6717488 | up | chromosome 12 open reading frame 23                          |
| 8155673 | PIP5K1B         | 1.6711348 | up | phosphatidylinositol-4-phosphate 5-kinase, type I, beta      |
| 8101489 | CCDC98          | 1.6708043 | up | coiled-coil domain containing 98                             |
| 8150143 | PURG            | 1.6692485 | up | purine-rich element binding protein G                        |
| 7986411 | MEF2A           | 1.6678901 | up | myocyte enhancer factor 2A                                   |
| 7965048 | NAP1L1          | 1.6671144 | up | nucleosome assembly protein 1-like 1                         |
| 8103415 | C4orf18         | 1.6656787 | up | chromosome 4 open reading frame 18                           |
| 8069532 | STCH            | 1.6646198 | up | stress 70 protein chaperone, microsomal-associated, 60kD     |
| 8041048 | FOSL2           | 1.6636785 | up | FOS-like antigen 2                                           |
| 8109283 | NDST1           | 1.6631229 | up | N-deacetylase/N-sulfotransferase (heparan glucosaminyl)      |
| 8056837 | GPR155          | 1.6622484 | up | G protein-coupled receptor 155                               |
| 7985662 | PDE8A           | 1.662105  | up | phosphodiesterase 8A                                         |
| 7979131 | GNG2            | 1.6585479 | up | guanine nucleotide binding protein (G protein), gamma 2      |
| 8164269 | ENG             | 1.6554179 | up | endoglin (Osler-Rendu-Weber syndrome 1)                      |
| 8138824 | SCRN1           | 1.6553221 | up | secernin 1                                                   |
| 7950248 | FCHSD2          | 1.6551965 | up | FCH and double SH3 domains 2                                 |
| 8004184 | XAF1            | 1.6543316 | up | XIAP associated factor 1                                     |
| 7982757 | CASC5           | 1.6537023 | up | cancer susceptibility candidate 5                            |
| 7933010 | PARD3           | 1.6533076 | up | par-3 partitioning defective 3 homolog (C. elegans)          |
| 8122860 | MYCT1           | 1.6530552 | up | myc target 1                                                 |

Supplemental Table 1a  
eMSC vs. eEP

|         |                  |           |    |                                                                    |
|---------|------------------|-----------|----|--------------------------------------------------------------------|
| 8047272 | LOC26010         | 1.6461486 | up | viral DNA polymerase-transactivated protein 6                      |
| 7957298 | NAV3             | 1.6459184 | up | neuron navigator 3                                                 |
| 7996571 | FAM65A           | 1.6454608 | up | family with sequence similarity 65, member A                       |
| 7928444 | VCL              | 1.6453354 | up | vinculin                                                           |
| 8068238 | IFNAR2           | 1.6428049 | up | interferon (alpha, beta and omega) receptor 2                      |
| 7933194 | CXCL12           | 1.6393218 | up | chemokine (C-X-C motif) ligand 12 (stromal cell-derived fa         |
| 7956759 | SRGAP1           | 1.6356778 | up | SLIT-ROBO Rho GTPase activating protein 1                          |
| 8128123 | RRAGD            | 1.6345689 | up | Ras-related GTP binding D                                          |
| 8108166 | TXNDC15          | 1.629749  | up | thioredoxin domain containing 15                                   |
| 8168968 | GPRASP1          | 1.6296244 | up | G protein-coupled receptor associated sorting protein 1            |
| 8118455 | C4A C4B          | 1.6273344 | up | complement component 4A (Rodgers blood group)   com                |
| 7976012 | NRXN3            | 1.6268969 | up | neurexin 3                                                         |
| 8118409 | C4A C4B          | 1.6268592 | up | complement component 4A (Rodgers blood group)   com                |
| 8179399 | C4A C4B          | 1.620161  | up | complement component 4A (Rodgers blood group)   com                |
| 8023497 | ATP8B1           | 1.6145998 | up | ATPase, class I, type 8B, member 1                                 |
| 8067985 | NCAM2            | 1.614429  | up | neural cell adhesion molecule 2                                    |
| 8013753 | RAB34            | 1.6110588 | up |                                                                    |
| 8099797 | RELL1            | 1.6082281 | up | RELT-like 1                                                        |
| 7968154 | ATP8A2           | 1.6041573 | up | ATPase, aminophospholipid transporter-like, class I, type 1        |
| 7981320 | MEG3             | 1.5956975 | up | maternally expressed 3                                             |
| 8122660 | UST              | 1.5943005 | up | uronyl-2-sulfotransferase                                          |
| 7942791 | LOC100008589 WIC | 1.5935968 | up | 28S ribosomal RNA   WD repeat domain 88                            |
| 8080810 | PTPRG            | 1.5923679 | up | protein tyrosine phosphatase, receptor type, G                     |
| 7904131 | DCLRE1B          | 1.5923527 | up | DNA cross-link repair 1B (PSO2 homolog, <i>S. cerevisiae</i> )     |
| 8091422 | WWTR1            | 1.5915848 | up | WW domain containing transcription regulator 1                     |
| 8109576 | THG1L            | 1.591023  | up | tRNA-histidine guanylyltransferase 1-like ( <i>S. cerevisiae</i> ) |
| 7986701 | HERC2P2 LOC2837  | 1.5899861 | up | hect domain and RLD 2 pseudogene 2   hypothetical prot             |
| 7926223 | CAMK1D           | 1.5875316 | up | calcium/calmodulin-dependent protein kinase ID                     |
| 8100870 | ADAMTS3          | 1.5854834 | up | ADAM metallopeptidase with thrombospondin type 1 mo                |
| 7913582 | ZNF436           | 1.5826675 | up | zinc finger protein 436                                            |
| 8103630 | SH3RF1           | 1.5808251 | up | SH3 domain containing ring finger 1                                |
| 8129482 | SAMD3            | 1.5767437 | up | sterile alpha motif domain containing 3                            |
| 8049044 | ARMC9            | 1.5733814 | up | armadillo repeat containing 9                                      |

Supplemental Table 1a  
eMSC vs. eEP

|         |                    |           |    |                                                              |
|---------|--------------------|-----------|----|--------------------------------------------------------------|
| 8056102 | CD302              | 1.5728132 | up |                                                              |
| 8147580 | VPS13B             | 1.5692434 | up | vacuolar protein sorting 13 homolog B (yeast)                |
| 8009301 | PRKCA              | 1.5683299 | up | protein kinase C, alpha                                      |
| 8130032 | FBXO30             | 1.5682641 | up | F-box protein 30                                             |
| 7943218 | PANX1              | 1.5681849 | up | pannexin 1                                                   |
| 7978407 | PRKD1              | 1.5673932 | up | protein kinase D1                                            |
| 8133258 | WBSCR17            | 1.5663092 | up | Williams-Beuren syndrome chromosome region 17                |
| 7917370 | COL24A1            | 1.5653907 | up | collagen, type XXIV, alpha 1                                 |
| 7922229 | SELE               | 1.5630802 | up | selectin E (endothelial adhesion molecule 1)                 |
| 7957570 | PLXNC1             | 1.5594465 | up | plexin C1                                                    |
| 8128284 | EPHA7              | 1.5587832 | up | EPH receptor A7                                              |
| 7927732 | ARID5B             | 1.5580089 | up | AT rich interactive domain 5B (MRF1-like)                    |
| 7982154 | HERC2P2   LOC2837  | 1.5559611 | up | hect domain and RLD 2 pseudogene 2   hypothetical prot       |
| 8072015 | ADRBK2             | 1.552796  | up | adrenergic, beta, receptor kinase 2                          |
| 7919619 | HIST2H2AA3   HIST2 | 1.5511969 | up | histone cluster 2, H2aa3   histone cluster 2, H2aa4   histo  |
| 7905079 | HIST2H2AA3   HIST2 | 1.550594  | up | histone cluster 2, H2aa3   histone cluster 2, H2aa4          |
| 8062971 | DBNDD2   SYS1-DBN  | 1.5474427 | up | dysbindin (dystrobrevin binding protein 1) domain contain    |
| 8139656 | GRB10              | 1.5465255 | up | growth factor receptor-bound protein 10                      |
| 8015759 | VAT1               | 1.5459013 | up | vesicle amine transport protein 1 homolog (T. californica)   |
| 8179519 | HLA-DPB1           | 1.5457711 | up | major histocompatibility complex, class II, DP beta 1        |
| 7953135 | TULP3              | 1.543955  | up | tubby like protein 3                                         |
| 7950883 | OR7E13P            | 1.5436736 | up | olfactory receptor, family 7, subfamily E, member 13 pseu    |
| 8088180 | WNT5A              | 1.5435183 | up | wingless-type MMTV integration site family, member 5A        |
| 8000811 | MAPK3              | 1.541875  | up | mitogen-activated protein kinase 3                           |
| 7905116 | PLEKHO1            | 1.5387826 | up | pleckstrin homology domain containing, family O member       |
| 8008819 | YPEL2              | 1.5378028 | up | yippee-like 2 (Drosophila)                                   |
| 8114733 | CENTD3             | 1.536488  | up | centaurin, delta 3                                           |
| 8051605 | HNRPLL             | 1.5361546 | up | heterogeneous nuclear ribonucleoprotein L-like               |
| 8005847 | TNFAIP1            | 1.534772  | up | tumor necrosis factor, alpha-induced protein 1 (endotheli    |
| 7902425 | ST6GALNAC3         | 1.5335995 | up | ST6 (alpha-N-acetyl-neuraminy-2,3-beta-galactosyl-1,3)-N     |
| 7983843 | TCF12              | 1.5334768 | up | transcription factor 12 (HTF4, helix-loop-helix transcriptio |
| 8121916 | RSPO3              | 1.5328665 | up | R-spondin 3 homolog (Xenopus laevis)                         |
| 7927799 | REEP3              | 1.531367  | up | receptor accessory protein 3                                 |

Supplemental Table 1a  
eMSC vs. eEP

|         |              |           |    |                                                              |
|---------|--------------|-----------|----|--------------------------------------------------------------|
| 8151101 | MYBL1        | 1.5304925 | up | v-myb myeloblastosis viral oncogene homolog (avian)-like     |
| 8040552 | NCOA1        | 1.530044  | up | nuclear receptor coactivator 1                               |
| 8168984 | BHLHB9       | 1.5284308 | up | basic helix-loop-helix domain containing, class B, 9         |
| 8053315 | LRRTM4       | 1.5272882 | up | leucine rich repeat transmembrane neuronal 4                 |
| 8055096 | AMMECR1L     | 1.5265045 | up | AMME chromosomal region gene 1-like                          |
| 8059576 | PID1         | 1.5260825 | up | phosphotyrosine interaction domain containing 1              |
| 8046542 | HOXD9        | 1.5251622 | up | homeobox D9                                                  |
| 7949765 | PPP1CA       | 1.5238606 | up | protein phosphatase 1, catalytic subunit, alpha isoform      |
| 8076046 | TMEM184B     | 1.5238072 | up | transmembrane protein 184B                                   |
| 8106602 | ZFYVE16      | 1.523695  | up | zinc finger, FYVE domain containing 16                       |
| 8052355 | EFEMP1       | 1.5228716 | up | EGF-containing fibulin-like extracellular matrix protein 1   |
| 8170007 | LOC644538    | 1.5205585 | up |                                                              |
| 7976818 | SNORD114-6   | 1.5194167 | up | small nucleolar RNA, C/D box 114-6                           |
| 8112746 | WDR41        | 1.5153995 | up | WD repeat domain 41                                          |
| 8092691 | BCL6         | 1.5125351 | up | B-cell CLL/lymphoma 6 (zinc finger protein 51)               |
| 8047538 | BMPR2        | 1.5100489 | up | bone morphogenetic protein receptor, type II (serine/thre    |
| 8065353 | THBD         | 1.5083665 | up | thrombomodulin                                               |
| 8046906 | GULP1        | 1.5080698 | up | GULP, engulfment adaptor PTB domain containing 1             |
| 8057732 | LOC100131211 | 1.506801  | up | similar to hCG1646803                                        |
| 8017736 | CCDC46       | 1.5043564 | up | coiled-coil domain containing 46                             |
| 7940028 | SERPING1     | 1.5038261 | up | serpin peptidase inhibitor, clade G (C1 inhibitor), member   |
| 8171481 | AP1S2        | 1.5038023 | up | adaptor-related protein complex 1, sigma 2 subunit           |
| 8092134 | PLD1         | 1.5017741 | up | phospholipase D1, phosphatidylcholine-specific               |
| 8139500 | TNS3         | 1.50058   | up | tensin 3                                                     |
| 8062108 | PROCR        | 1.4997659 | up | protein C receptor, endothelial (EPCR)                       |
| 8077499 | LOH3CR2A     | 1.499074  | up | loss of heterozygosity, 3, chromosomal region 2, gene A      |
| 8003298 | SLC7A5       | 1.499045  | up | solute carrier family 7 (cationic amino acid transporter, y+ |
| 8162373 | OGN          | 1.4988964 | up | osteoglycin                                                  |
| 8061227 | SLC24A3      | 1.4972069 | up | solute carrier family 24 (sodium/potassium/calcium excha     |
| 8115814 | SH3PXD2B     | 1.4961814 | up | SH3 and PX domains 2B                                        |
| 8063382 | SNAI1        | 1.4935888 | up | snail homolog 1 (Drosophila)                                 |
| 8096669 | TET2         | 1.4909766 | up | tet oncogene family member 2                                 |
| 7956878 | IRAK3        | 1.4909431 | up | interleukin-1 receptor-associated kinase 3                   |

Supplemental Table 1a  
eMSC vs. eEP

|         |               |           |    |                                                             |
|---------|---------------|-----------|----|-------------------------------------------------------------|
| 8085914 | SLC4A7        | 1.4906591 | up | solute carrier family 4, sodium bicarbonate cotransporter,  |
| 8034021 | CDC37         | 1.4901567 | up | cell division cycle 37 homolog ( <i>S. cerevisiae</i> )     |
| 8121927 | RNF146        | 1.4883028 | up | ring finger protein 146                                     |
| 8100393 | KDR           | 1.4878427 | up | kinase insert domain receptor (a type III receptor tyrosine |
| 8083429 | MBNL1         | 1.4871968 | up | muscleblind-like ( <i>Drosophila</i> )                      |
| 8140556 | HGF           | 1.4854122 | up | hepatocyte growth factor (hepapoietin A; scatter factor)    |
| 7971780 | NEK3          | 1.4719753 | up | NIMA (never in mitosis gene a)-related kinase 3             |
| 8120428 | FKBP1A FKBP1C | 1.4688172 | up | FK506 binding protein 1A, 12kDa   FK506 binding protein     |
| 8147516 | MATN2         | 1.4670447 | up | matrilin 2                                                  |
| 7974697 | DAAM1         | 1.4632666 | up | dishevelled associated activator of morphogenesis 1         |
| 8053668 | EIF2AK3       | 1.4622983 | up | eukaryotic translation initiation factor 2-alpha kinase 3   |
| 8163839 | C5            | 1.4593109 | up | complement component 5                                      |
| 8152656 | ZHX1 C8orf76  | 1.4568627 | up | zinc fingers and homeoboxes 1   chromosome 8 open rea       |
| 7902104 | PDE4B         | 1.4549831 | up | phosphodiesterase 4B, cAMP-specific (phosphodiesterase      |
| 8127778 | FAM46A        | 1.4530183 | up | family with sequence similarity 46, member A                |
| 7899627 | TINAGL1       | 1.4517261 | up | tubulointerstitial nephritis antigen-like 1                 |
| 7943803 | DIXDC1        | 1.4511987 | up | DIX domain containing 1                                     |
| 8168976 | GPRASP2       | 1.4500734 | up | G protein-coupled receptor associated sorting protein 2     |
| 8137264 | TMEM176A      | 1.44994   | up | transmembrane protein 176A                                  |
| 7966150 | SSH1          | 1.4496922 | up | slingshot homolog 1 ( <i>Drosophila</i> )                   |
| 8052721 | PPP3R1 WDR92  | 1.4484042 | up | protein phosphatase 3 (formerly 2B), regulatory subunit B   |
| 7932243 | C10orf38      | 1.4462358 | up | chromosome 10 open reading frame 38                         |
| 7933821 | RHOBTB1       | 1.4459108 | up | Rho-related BTB domain containing 1                         |
| 7963157 | RACGAP1       | 1.4458302 | up | Rac GTPase activating protein 1                             |
| 7938629 | PDE3B         | 1.4399852 | up | phosphodiesterase 3B, cGMP-inhibited                        |
| 8042416 | ARHGAP25      | 1.4389627 | up | Rho GTPase activating protein 25                            |
| 7965156 | LIN7A         | 1.4378325 | up | lin-7 homolog A ( <i>C. elegans</i> )                       |
| 8092654 | RPL39L        | 1.4371461 | up | ribosomal protein L39-like                                  |
| 8104321 | ADAMTS16      | 1.4354517 | up | ADAM metallopeptidase with thrombospondin type 1 mo         |
| 7984217 | PLEKHO2       | 1.4348848 | up | pleckstrin homology domain containing, family O member      |
| 8007348 | RAMP2         | 1.4348432 | up | receptor (G protein-coupled) activity modifying protein 2   |
| 7909175 | SRGAP2        | 1.4344566 | up | SLIT-ROBO Rho GTPase activating protein 2                   |
| 8105121 | GHR           | 1.4342594 | up | growth hormone receptor                                     |

Supplemental Table 1a  
eMSC vs. eEP

|         |                 |           |    |                                                           |
|---------|-----------------|-----------|----|-----------------------------------------------------------|
| 8163444 | ZFP37           | 1.4332004 | up | zinc finger protein 37 homolog (mouse)                    |
| 8107823 | ADAMTS19        | 1.4330049 | up | ADAM metalloproteinase with thrombospondin type 1 mo      |
| 7958913 | OAS2            | 1.432479  | up | 2'-5'-oligoadenylate synthetase 2, 69/71kDa               |
| 8079305 | CLEC3B          | 1.4323049 | up | C-type lectin domain family 3, member B                   |
| 8083757 | NMD3            | 1.4292717 | up |                                                           |
| 8013399 | ULK2            | 1.4291017 | up | unc-51-like kinase 2 (C. elegans)                         |
| 8077490 | LMCD1           | 1.4275264 | up | LIM and cysteine-rich domains 1                           |
| 8102468 | PRSS12          | 1.4271079 | up | protease, serine, 12 (neurotrypsin, motopsin)             |
| 8089261 | CBLB            | 1.4234124 | up | Cas-Br-M (murine) ecotropic retroviral transforming sequ  |
| 8139488 | IGFBP3          | 1.4230068 | up | insulin-like growth factor binding protein 3              |
| 8067932 | C21orf34        | 1.4221827 | up | chromosome 21 open reading frame 34                       |
| 8046546 | HOXD8           | 1.4206376 | up | homeobox D8                                               |
| 8112940 | SSBP2           | 1.4202617 | up | single-stranded DNA binding protein 2                     |
| 8065566 | DEFB124         | 1.4195621 | up | defensin, beta 124                                        |
| 8135568 | MDFIC           | 1.4190913 | up | MyoD family inhibitor domain containing                   |
| 8070557 | ZNF295          | 1.4185884 | up | zinc finger protein 295                                   |
| 8131339 | FSCN1           | 1.4184617 | up | fascin homolog 1, actin-bundling protein (Strongylocentro |
| 8029489 | BCAM            | 1.4177779 | up | basal cell adhesion molecule (Lutheran blood group)       |
| 8153684 | DGAT1 LOC727765 | 1.4176732 | up | diacylglycerol O-acyltransferase homolog 1 (mouse)   sim  |
| 7996947 | CYB5B           | 1.4159486 | up | cytochrome b5 type B (outer mitochondrial membrane)       |
| 8172158 | CASK            | 1.4156296 | up | calcium/calmodulin-dependent serine protein kinase (MA    |
| 8108127 | CAMLG           | 1.4153816 | up | calcium modulating ligand                                 |
| 7932826 | KIAA1462        | 1.4145446 | up |                                                           |
| 7954810 | LRRK2           | 1.4126993 | up | leucine-rich repeat kinase 2                              |
| 8101839 | EIF4E           | 1.4125108 | up | eukaryotic translation initiation factor 4E               |
| 8059708 | SNORA75         | 1.4122906 | up | small nucleolar RNA, H/ACA box 75                         |
| 8153939 | DGAT1 LOC727765 | 1.4119972 | up | diacylglycerol O-acyltransferase homolog 1 (mouse)   sim  |
| 7977397 | CRIP2           | 1.4108747 | up | cysteine-rich protein 2                                   |
| 8012475 | MYH10           | 1.4085221 | up | myosin, heavy chain 10, non-muscle                        |
| 8113717 | MGC32805        | 1.4083488 | up |                                                           |
| 7956522 | KIF5A           | 1.4074355 | up | kinesin family member 5A                                  |
| 7996264 | CDH5            | 1.4048948 | up | cadherin 5, type 2, VE-cadherin (vascular epithelium)     |
| 8094184 | C1QTNF7         | 1.4045808 | up | C1q and tumor necrosis factor related protein 7           |

Supplemental Table 1a  
eMSC vs. eEP

|         |                 |           |    |                                                           |
|---------|-----------------|-----------|----|-----------------------------------------------------------|
| 8056963 | LOC100129455    | 1.403859  | up |                                                           |
| 8128818 | WASF1           | 1.4033079 | up | WAS protein family, member 1                              |
| 7930857 | EMX2            | 1.4014758 | up | empty spiracles homeobox 2                                |
| 8115734 | LCP2            | 1.400918  | up | lymphocyte cytosolic protein 2 (SH2 domain containing le  |
| 7955562 | ACVRL1          | 1.4008809 | up | activin A receptor type II-like 1                         |
| 8175593 | IDS             | 1.3996189 | up | iduronate 2-sulfatase (Hunter syndrome)                   |
| 8037614 | GPR4            | 1.3988783 | up | G protein-coupled receptor 4                              |
| 8009183 | MAP3K3          | 1.3964216 | up | mitogen-activated protein kinase kinase kinase 3          |
| 8093304 | CCRL2 LOC727811 | 1.396191  | up | chemokine (C-C motif) receptor-like 2   similar to chemok |
| 8128099 | GABRR2          | 1.3960664 | up | gamma-aminobutyric acid (GABA) receptor, rho 2            |
| 7909142 | LOC100130123 NU | 1.3944558 | up | PRO2870   nuclear casein kinase and cyclin-dependent kin  |
| 7925257 | LYST            | 1.3936497 | up | lysosomal trafficking regulator                           |
| 8127872 | SNAP91          | 1.3934321 | up | synaptosomal-associated protein, 91kDa homolog (mouse     |
| 7988789 | DMXL2           | 1.3912047 | up | Dmx-like 2                                                |
| 8027701 | GRAMD1A         | 1.3895122 | up | GRAM domain containing 1A                                 |
| 7932554 | ARHGAP21        | 1.3894917 | up | Rho GTPase activating protein 21                          |
| 8171561 | SCML2           | 1.3892655 | up | sex comb on midleg-like 2 (Drosophila)                    |
| 8151496 | ZNF704          | 1.3890309 | up | zinc finger protein 704                                   |
| 8155121 | NPR2            | 1.3879814 | up | natriuretic peptide receptor B/guanylate cyclase B (atrio |
| 8046086 | LASS6           | 1.3878258 | up | LAG1 homolog, ceramide synthase 6                         |
| 8118594 | HLA-DPB1        | 1.387614  | up | major histocompatibility complex, class II, DP beta 1     |
| 8025601 | ICAM1           | 1.387099  | up | intercellular adhesion molecule 1 (CD54), human rhinovir  |
| 7943998 | NNMT            | 1.3862864 | up | nicotinamide N-methyltransferase                          |
| 7913450 | HSPG2           | 1.385184  | up | heparan sulfate proteoglycan 2                            |
| 8042283 | HSPC159         | 1.3844292 | up | galectin-related protein                                  |
| 8177717 | HLA-F           | 1.3839457 | up | major histocompatibility complex, class I, F              |
| 8003814 | ASPA            | 1.3831595 | up | aspartoacylase (Canavan disease)                          |
| 8057797 | SDPR            | 1.3821771 | up | serum deprivation response (phosphatidylserine binding p  |
| 8120362 | C6orf65         | 1.3772615 | up | chromosome 6 open reading frame 65                        |
| 8134552 | ARPC1B          | 1.3769895 | up | actin related protein 2/3 complex, subunit 1B, 41kDa      |
| 8138504 | RAPGEF5         | 1.3766053 | up | Rap guanine nucleotide exchange factor (GEF) 5            |
| 7913237 | CAMK2N1         | 1.3762689 | up | calcium/calmodulin-dependent protein kinase II inhibitor  |
| 8094609 | FAM114A1        | 1.3746897 | up | family with sequence similarity 114, member A1            |

Supplemental Table 1a  
eMSC vs. eEP

|         |                |           |    |                                                              |
|---------|----------------|-----------|----|--------------------------------------------------------------|
| 8084794 | IL1RAP         | 1.3742105 | up | interleukin 1 receptor accessory protein                     |
| 8051864 | hCG_1645220    | 1.3738542 | up | hCG1645220                                                   |
| 8103092 | LOC100129572   | 1.3730307 | up |                                                              |
| 8008646 | SCPEP1         | 1.3715723 | up | serine carboxypeptidase 1                                    |
| 8058614 | LANCL1         | 1.3703821 | up | LanC lantibiotic synthetase component C-like 1 (bacterial)   |
| 7966929 | RAB35          | 1.3700752 | up |                                                              |
| 8084880 | HES1           | 1.367758  | up | hairy and enhancer of split 1, (Drosophila)                  |
| 8042310 | SLC1A4         | 1.3672003 | up | solute carrier family 1 (glutamate/neutral amino acid tran   |
| 8173414 | SLC7A3         | 1.3661531 | up | solute carrier family 7 (cationic amino acid transporter, γ+ |
| 8078066 | FGD5           | 1.364838  | up | FYVE, RhoGEF and PH domain containing 5                      |
| 7916493 | PPAP2B         | 1.3647149 | up | phosphatidic acid phosphatase type 2B                        |
| 8094501 | STIM2          | 1.3639723 | up | stromal interaction molecule 2                               |
| 8157976 | GARNL3         | 1.363862  | up | GTPase activating Rap/RanGAP domain-like 3                   |
| 7968351 | C13orf33       | 1.3631423 | up | chromosome 13 open reading frame 33                          |
| 8125556 | HLA-DPA1       | 1.362264  | up | major histocompatibility complex, class II, DP alpha 1       |
| 8019639 | RNU2 RNU2B WDF | 1.3592056 | up | RNA, U2 small nuclear   RNA, U2B small nuclear   WD rep      |
| 8019641 | RNU2 RNU2B WDF | 1.359098  | up | RNA, U2 small nuclear   RNA, U2B small nuclear   WD rep      |
| 8019705 | RNU2 RNU2B WDF | 1.3590268 | up | RNA, U2 small nuclear   RNA, U2B small nuclear   WD rep      |
| 8019633 | RNU2 RNU2B WDF | 1.3589807 | up | RNA, U2 small nuclear   RNA, U2B small nuclear   WD rep      |
| 8019635 | RNU2 RNU2B WDF | 1.3589357 | up | RNA, U2 small nuclear   RNA, U2B small nuclear   WD rep      |
| 8019703 | RNU2 RNU2B WDF | 1.3589143 | up | RNA, U2 small nuclear   RNA, U2B small nuclear   WD rep      |
| 8019707 | RNU2 RNU2B WDF | 1.3588865 | up | RNA, U2 small nuclear   RNA, U2B small nuclear   WD rep      |
| 8019637 | RNU2 RNU2B WDF | 1.3588136 | up | RNA, U2 small nuclear   RNA, U2B small nuclear   WD rep      |
| 8019631 | RNU2 RNU2B WDF | 1.3586055 | up | RNA, U2 small nuclear   RNA, U2B small nuclear   WD rep      |
| 8121794 | SMPDL3A        | 1.3583674 | up | sphingomyelin phosphodiesterase, acid-like 3A                |
| 8180100 | HLA-DPA1       | 1.3576096 | up | major histocompatibility complex, class II, DP alpha 1       |
| 7969330 | PCDH17         | 1.3570858 | up | protocadherin 17                                             |
| 7927631 | DKK1           | 1.3553244 | up | dickkopf homolog 1 (Xenopus laevis)                          |
| 8086953 | SHISA5         | 1.3550421 | up | shisa homolog 5 (Xenopus laevis)                             |
| 8140782 | ABCB1          | 1.354912  | up | ATP-binding cassette, sub-family B (MDR/TAP), member 1       |
| 8029693 | FOSB           | 1.3541696 | up | FBJ murine osteosarcoma viral oncogene homolog B             |
| 8019802 | RNU2 RNU2B WDF | 1.352855  | up | RNA, U2 small nuclear   RNA, U2B small nuclear   WD rep      |
| 8178891 | HLA-DPA1       | 1.3513972 | up | major histocompatibility complex, class II, DP alpha 1       |



Supplemental Table 1a  
eMSC vs. eEP

|         |                 |           |    |                                                           |
|---------|-----------------|-----------|----|-----------------------------------------------------------|
| 7983734 | TMOD2           | 1.3506049 | up | tropomodulin 2 (neuronal)                                 |
| 8079407 | CCRL2 LOC727811 | 1.3483253 | up | chemokine (C-C motif) receptor-like 2   similar to chemok |
| 8147777 | CTHRC1          | 1.3479023 | up | collagen triple helix repeat containing 1                 |
| 7960438 | TMEM16B         | 1.3467722 | up | transmembrane protein 16B                                 |
| 7906564 | PEA15           | 1.3450563 | up | phosphoprotein enriched in astrocytes 15                  |
| 7956488 | KIF5A           | 1.3443462 | up | kinesin family member 5A                                  |
| 8094574 | TBC1D1          | 1.3436024 | up | TBC1 (tre-2/USP6, BUB2, cdc16) domain family, member 1    |
| 8179019 | HLA-F           | 1.3426591 | up | major histocompatibility complex, class I, F              |
| 8084955 | PIGX            | 1.3421406 | up | phosphatidylinositol glycan anchor biosynthesis, class X  |
| 8019709 | RNU2 RNU2B WDF  | 1.3412735 | up | RNA, U2 small nuclear   RNA, U2B small nuclear   WD rep   |
| 8112388 | TRIM23          | 1.3410211 | up | tripartite motif-containing 23                            |
| 7933733 | FAM13C1         | 1.3397324 | up | family with sequence similarity 13, member C1             |
| 7972936 | FAM70B          | 1.3382689 | up | family with sequence similarity 70, member B              |
| 8011884 | NLRP1           | 1.3377457 | up | NLR family, pyrin domain containing 1                     |
| 8021946 | COLEC12         | 1.3363224 | up | collectin sub-family member 12                            |
| 8137244 | GIMAP4          | 1.3355091 | up | GTPase, IMAP family member 4                              |
| 8046078 | B3GALT1         | 1.3353442 | up | UDP-Gal:betaGlcNAc beta 1,3-galactosyltransferase, poly   |
| 7917561 | GBP4            | 1.329088  | up | guanylate binding protein 4                               |
| 8096415 | MMRN1           | 1.3276001 | up | multimerin 1                                              |
| 7917199 | TTL7            | 1.3264588 | up | tubulin tyrosine ligase-like family, member 7             |
| 7929032 | FAS             | 1.3257651 | up | Fas (TNF receptor superfamily, member 6)                  |
| 7986293 | MCTP2           | 1.3256637 | up | multiple C2 domains, transmembrane 2                      |
| 7926609 | BMI1            | 1.3255241 | up |                                                           |
| 8165752 | IL3RA           | 1.3251588 | up | interleukin 3 receptor, alpha (low affinity)              |
| 8176323 | IL3RA           | 1.3245533 | up | interleukin 3 receptor, alpha (low affinity)              |
| 7939197 | HIPK3           | 1.3213397 | up | homeodomain interacting protein kinase 3                  |
| 8141035 | SGCE            | 1.3198678 | up | sarcoglycan, epsilon                                      |
| 7947425 | CD59            | 1.3198353 | up |                                                           |
| 7914516 | LOC339483       | 1.319125  | up |                                                           |
| 8059680 | HTR2B           | 1.317903  | up | 5-hydroxytryptamine (serotonin) receptor 2B               |
| 8063458 | DOK5            | 1.3178868 | up | docking protein 5                                         |
| 7902810 | LMO4            | 1.3161712 | up | LIM domain only 4                                         |
| 7946245 | DCHS1           | 1.316159  | up | dachsous 1 (Drosophila)                                   |

Supplemental Table 1a  
eMSC vs. eEP

|         |                  |           |    |                                                              |
|---------|------------------|-----------|----|--------------------------------------------------------------|
| 7901272 | CYP4X1           | 1.3152987 | up | cytochrome P450, family 4, subfamily X, polypeptide 1        |
| 7907611 | RASAL2           | 1.3133739 | up | RAS protein activator like 2                                 |
| 7927786 | REEP3            | 1.3132545 | up | receptor accessory protein 3                                 |
| 8070194 | RUNX1            | 1.3122132 | up | runt-related transcription factor 1 (acute myeloid leukemia) |
| 7960383 | PARP11           | 1.3121034 | up | poly (ADP-ribose) polymerase family, member 11               |
| 7975361 | KIAA0247         | 1.3111852 | up |                                                              |
| 8041995 | SPTBN1           | 1.3104081 | up | spectrin, beta, non-erythrocytic 1                           |
| 8067554 | TCFL5            | 1.3088001 | up | transcription factor-like 5 (basic helix-loop-helix)         |
| 8117800 | HLA-A HLA-H HLA- | 1.308092  | up | major histocompatibility complex, class I, A   major histoc  |
| 8008113 | CALCOCO2         | 1.3077911 | up | calcium binding and coiled-coil domain 2                     |
| 7919095 | NOTCH2           | 1.3040698 | up | Notch homolog 2 (Drosophila)                                 |
| 7939559 | TSPAN18          | 1.3024431 | up | tetraspanin 18                                               |
| 7955578 | GRASP            | 1.3013465 | up | GRP1 (general receptor for phosphoinositides 1)-associate    |
| 8027604 | KIAA0355         | 1.3004856 | up |                                                              |
| 7959893 | GPR133           | 1.300163  | up | G protein-coupled receptor 133                               |
| 7968976 | LRCH1            | 1.299728  | up | leucine-rich repeats and calponin homology (CH) domain       |
| 8056217 | MXRA7            | 1.2989582 | up | matrix-remodelling associated 7                              |
| 8167998 | AR               | 1.2980133 | up | androgen receptor (dihydrotestosterone receptor; testicu     |
| 8003357 | FAM38A           | 1.2965999 | up | family with sequence similarity 38, member A                 |
| 7965436 | EEA1             | 1.29592   | up | early endosome antigen 1                                     |
| 8098103 | FNIP2            | 1.295195  | up | folliculin interacting protein 2                             |
| 8149749 | TNFRSF10D        | 1.2926607 | up | tumor necrosis factor receptor superfamily, member 10d,      |
| 8083523 | GMPS             | 1.2892846 | up | guanine monophosphate synthetase                             |
| 8124397 | HIST1H1C         | 1.2892258 | up | histone cluster 1, H1c                                       |
| 8157216 | UGCG             | 1.288173  | up | UDP-glucose ceramide glucosyltransferase                     |
| 7903358 | VCAM1            | 1.2848344 | up | vascular cell adhesion molecule 1                            |
| 8178867 | TAP1             | 1.2843163 | up | transporter 1, ATP-binding cassette, sub-family B (MDR/T,    |
| 8125512 | TAP1             | 1.2832881 | up | transporter 1, ATP-binding cassette, sub-family B (MDR/T,    |
| 8180061 | TAP1             | 1.2832333 | up | transporter 1, ATP-binding cassette, sub-family B (MDR/T,    |
| 8058477 | KLF7             | 1.2830293 | up | Kruppel-like factor 7 (ubiquitous)                           |
| 8177732 | HLA-A HLA-H HLA- | 1.2821686 | up | major histocompatibility complex, class I, A   major histoc  |
| 7908940 | ATP2B4           | 1.2803975 | up | ATPase, Ca <sup>++</sup> transporting, plasma membrane 4     |
| 8059642 | SLC16A14         | 1.2803386 | up | solute carrier family 16, member 14 (monocarboxylic acid     |

Supplemental Table 1a  
eMSC vs. eEP

|         |          |           |    |                                                                     |
|---------|----------|-----------|----|---------------------------------------------------------------------|
| 8030133 | NUCB1    | 1.2802414 | up | nucleobindin 1                                                      |
| 8164665 | RAPGEF1  | 1.2799482 | up | Rap guanine nucleotide exchange factor (GEF) 1                      |
| 8178220 | HLA-DPB1 | 1.2793446 | up | major histocompatibility complex, class II, DP beta 1               |
| 8101376 | SEC31A   | 1.2781311 | up | SEC31 homolog A ( <i>S. cerevisiae</i> )                            |
| 8137280 | NOS3     | 1.2780052 | up | nitric oxide synthase 3 (endothelial cell)                          |
| 7925229 | B3GALNT2 | 1.2778598 | up | beta-1,3-N-acetylgalactosaminyltransferase 2                        |
| 8163618 | TNFSF15  | 1.2777691 | up | tumor necrosis factor (ligand) superfamily, member 15               |
| 7962375 | PRICKLE1 | 1.2769608 | up | prickle homolog 1 ( <i>Drosophila</i> )                             |
| 7995813 | MT1DP    | 1.2755494 | up | metallothionein 1D (pseudogene)                                     |
| 7921099 | CRABP2   | 1.2750822 | up | cellular retinoic acid binding protein 2                            |
| 7935660 | DNMBP    | 1.2746736 | up | dynamamin binding protein                                           |
| 8102232 | LEF1     | 1.2743907 | up | lymphoid enhancer-binding factor 1                                  |
| 7965652 | PCK2     | 1.272076  | up | PCK2 protein kinase 2                                               |
| 7918379 | GSTM3    | 1.2716043 | up | glutathione S-transferase M3 (brain)                                |
| 7917912 | DPYD     | 1.2703297 | up | dihydropyrimidine dehydrogenase                                     |
| 8175696 | GABRA3   | 1.2691646 | up | gamma-aminobutyric acid (GABA) A receptor, alpha 3                  |
| 7900658 | TIE1     | 1.2689179 | up | tyrosine kinase with immunoglobulin-like and EGF-like do            |
| 8081362 | CEP97    | 1.2678857 | up | centrosomal protein 97kDa                                           |
| 8130191 | RMND1    | 1.267517  | up | required for meiotic nuclear division 1 homolog ( <i>S. cerevis</i> |
| 8078619 | ITGA9    | 1.2648084 | up | integrin, alpha 9                                                   |
| 7989365 | RORA     | 1.2640651 | up | RAR-related orphan receptor A                                       |
| 8114920 | DPYSL3   | 1.2620513 | up | dihydropyrimidinase-like 3                                          |
| 8117890 | HLA-E    | 1.2612883 | up | major histocompatibility complex, class I, E                        |
| 8174103 | GK GK3P  | 1.2610196 | up | glycerol kinase   glycerol kinase 3 pseudogene                      |
| 8113981 | P4HA2    | 1.2610106 | up | procollagen-proline, 2-oxoglutarate 4-dioxygenase (prolin           |
| 7897378 | PER3     | 1.2601062 | up | period homolog 3 ( <i>Drosophila</i> )                              |
| 8091537 | IGSF10   | 1.2583579 | up | immunoglobulin superfamily, member 10                               |
| 7947553 | LRRC4C   | 1.2570409 | up | leucine rich repeat containing 4C                                   |
| 8080938 | MITF     | 1.2566226 | up | microphthalmia-associated transcription factor                      |
| 8179103 | HLA-E    | 1.2564752 | up | major histocompatibility complex, class I, E                        |
| 8177788 | HLA-E    | 1.2558414 | up | major histocompatibility complex, class I, E                        |
| 8006415 | TMEM98   | 1.2532042 | up | transmembrane protein 98                                            |
| 8109120 | AFAP1L1  | 1.2507285 | up | actin filament associated protein 1-like 1                          |

Supplemental Table 1a  
eMSC vs. eEP

|         |                  |           |    |                                                            |
|---------|------------------|-----------|----|------------------------------------------------------------|
| 7961440 | FLJ22662         | 1.250457  | up |                                                            |
| 7910706 | LGALS8           | 1.2503686 | up | lectin, galactoside-binding, soluble, 8 (galectin 8)       |
| 8156604 | C9orf102         | 1.2499194 | up | chromosome 9 open reading frame 102                        |
| 8117760 | HLA-F            | 1.2435741 | up | major histocompatibility complex, class I, F               |
| 8117054 | CAP2             | 1.2427746 | up | CAP, adenylate cyclase-associated protein, 2 (yeast)       |
| 8145454 | BNIP3L LOC440258 | 1.2426776 | up | BCL2/adenovirus E1B 19kDa interacting protein 3-like   si  |
| 7953626 | CLSTN3           | 1.242149  | up | calyculin 3                                                |
| 7933933 | DNAJC12          | 1.2411793 | up | DnaJ (Hsp40) homolog, subfamily C, member 12               |
| 8072603 | LOC100130269     | 1.2403529 | up | similar to Putative uncharacterized protein FLJ36925       |
| 8052125 | ASB3             | 1.2403139 | up | ankyrin repeat and SOCS box-containing 3                   |
| 8129231 | C6orf60          | 1.2396274 | up | chromosome 6 open reading frame 60                         |
| 7935180 | PDLIM1           | 1.2392159 | up | PDZ and LIM domain 1 (elfin)                               |
| 7927964 | SRGN             | 1.2370424 | up | serglycin                                                  |
| 8138922 | KBTBD2           | 1.2369118 | up | kelch repeat and BTB (POZ) domain containing 2             |
| 7968703 | NHLRC3           | 1.2356367 | up | NHL repeat containing 3                                    |
| 8022612 | ZNF521           | 1.2348222 | up | zinc finger protein 521                                    |
| 7909890 | HLX              | 1.2346371 | up | H2.0-like homeobox                                         |
| 8007620 | GRN              | 1.2338976 | up | granulin                                                   |
| 8102713 | NUDT6            | 1.2338192 | up | nudix (nucleoside diphosphate linked moiety X)-type moti   |
| 8089759 | TMEM39A          | 1.2336054 | up | transmembrane protein 39A                                  |
| 8088548 | LOC401070        | 1.2332942 | up | FLJ43791 protein                                           |
| 7922130 | DPT              | 1.2324172 | up | dermatopontin                                              |
| 8136954 | FAM139B LOC6527  | 1.2319319 | up | family with sequence similarity 139, member B   similar to |
| 7959834 | GLT1D1           | 1.2317847 | up | glycosyltransferase 1 domain containing 1                  |
| 8147030 | STMN2            | 1.231756  | up | stathmin-like 2                                            |
| 8171392 | ASB9             | 1.229995  | up | ankyrin repeat and SOCS box-containing 9                   |
| 8077472 | GRM7             | 1.2279714 | up | glutamate receptor, metabotropic 7                         |
| 8035297 | PLVAP            | 1.2273285 | up | plasmalemma vesicle associated protein                     |
| 8132897 | LANCL2           | 1.2273242 | up | LanC lantibiotic synthetase component C-like 2 (bacterial) |
| 7967386 | MPHOSPH9         | 1.2272475 | up | M-phase phosphoprotein 9                                   |
| 8172254 | CXorf36          | 1.2255652 | up | chromosome X open reading frame 36                         |
| 8017547 | ICAM2            | 1.2230746 | up | intercellular adhesion molecule 2                          |
| 7909603 | NENF             | 1.2226738 | up | neuron derived neurotrophic factor                         |

Supplemental Table 1a  
eMSC vs. eEP

|         |              |           |    |                                               |
|---------|--------------|-----------|----|-----------------------------------------------|
| 8123739 | NRN1         | 1.2224438 | up | neuritin 1                                    |
| 8156581 | C9orf102     | 1.2220603 | up | chromosome 9 open reading frame 102           |
| 8142424 | GPR85        | 1.2215178 | up | G protein-coupled receptor 85                 |
| 7948167 | AGTRL1       | 1.2214355 | up | angiotensin II receptor-like 1                |
| 8085788 | NKIRAS1      | 1.2211095 | up | NFKB inhibitor interacting Ras-like 1         |
| 8121861 | NCOA7        | 1.2205312 | up | nuclear receptor coactivator 7                |
| 7964868 | LOC100131613 | 1.2202399 | up | PRO1454                                       |
| 8096899 | C4orf32      | 1.2156615 | up | chromosome 4 open reading frame 32            |
| 8173755 | ITM2A        | 1.2145816 | up | integral membrane protein 2A                  |
| 8085556 | SH3BP5       | 1.2127568 | up | SH3-domain binding protein 5 (BTK-associated) |
| 8102567 | PRDM5        | 1.2124048 | up | PR domain containing 5                        |
| 8115783 | STK10        | 1.2122697 | up | serine/threonine kinase 10                    |
| 8109141 | GRPEL2       | 1.2111751 | up | GrpE-like 2, mitochondrial (E. coli)          |
| 8156601 | C9orf102     | 1.2080792 | up | chromosome 9 open reading frame 102           |
| 8042356 | MEIS1        | 1.2078882 | up | Meis homeobox 1                               |
| 8155898 | PCSK5        | 1.2078042 | up | proprotein convertase subtilisin/kexin type 5 |
| 7977674 | SUPT16H      | 1.2071964 | up | suppressor of Ty 16 homolog (S. cerevisiae)   |
| 8096361 | HERC5        | 1.2060475 | up | hect domain and RLD 5                         |
| 8153002 | NDRG1        | 1.205737  | up | N-myc downstream regulated gene 1             |
| 8080847 | C3orf14      | 1.2054077 | up | chromosome 3 open reading frame 14            |
| 7946635 | ZBED5        | 1.2036942 | up | zinc finger, BED-type containing 5            |
| 8054580 | BUB1         | 1.2032727 | up |                                               |
| 8125415 | C6orf10      | 1.2012327 | up | chromosome 6 open reading frame 10            |
| 8068644 | IGSF5        | 1.200043  | up | immunoglobulin superfamily, member 5          |
| 8132118 | AQP1         | 1.1998973 | up | aquaporin 1 (Colton blood group)              |
| 8001387 | SALL1        | 1.197518  | up | sal-like 1 (Drosophila)                       |
| 7918223 | C1orf59      | 1.1972767 | up | chromosome 1 open reading frame 59            |
| 8097657 | SMAD1        | 1.1963772 | up | SMAD family member 1                          |
| 7933186 | ZNF32        | 1.195302  | up | zinc finger protein 32                        |
| 7995787 | MT1M         | 1.1944797 | up | metallothionein 1M                            |
| 7968789 | C13orf15     | 1.1943934 | up | chromosome 13 open reading frame 15           |
| 8004691 | TMEM88       | 1.1941319 | up | transmembrane protein 88                      |
| 8163672 | DIPAS        | 1.1927478 | up | DIPLA1-antisense expressed                    |

Supplemental Table 1a  
eMSC vs. eEP

|         |                  |           |    |                                                               |
|---------|------------------|-----------|----|---------------------------------------------------------------|
| 8111569 | RANBP3L          | 1.1887969 | up | RAN binding protein 3-like                                    |
| 8114829 | YIPF5            | 1.1882704 | up | Yip1 domain family, member 5                                  |
| 8112584 | ZNF366           | 1.187984  | up | zinc finger protein 366                                       |
| 8089830 | LRRC58           | 1.1870124 | up | leucine rich repeat containing 58                             |
| 7960764 | RBP5             | 1.1867131 | up | retinol binding protein 5, cellular                           |
| 8136940 | FAM139A          | 1.1841366 | up | family with sequence similarity 139, member A                 |
| 7941104 | ARL2 SNX15       | 1.1834809 | up | ADP-ribosylation factor-like 2   sorting nexin 15             |
| 7934842 | MMRN2            | 1.183389  | up | multimerin 2                                                  |
| 7983763 | MAPK6            | 1.1827784 | up | mitogen-activated protein kinase 6                            |
| 7972713 | EFNB2            | 1.1817658 | up | ephrin-B2                                                     |
| 8022572 | OSBPL1A          | 1.1811393 | up | oxysterol binding protein-like 1A                             |
| 8042637 | DYSF             | 1.1754683 | up | dysferlin, limb girdle muscular dystrophy 2B (autosomal r     |
| 8010271 | PGS1             | 1.1748359 | up | phosphatidylglycerophosphate synthase 1                       |
| 8112857 | MTX3             | 1.1742446 | up | metaxin 3                                                     |
| 7951363 | CASP12           | 1.1723851 | up | caspace 12 (gene/pseudogene)                                  |
| 7971950 | DACH1            | 1.1717203 | up | dachshund homolog 1 (Drosophila)                              |
| 8102655 | BBS7             | 1.1705302 | up | Bardet-Biedl syndrome 7                                       |
| 8065403 | CST3             | 1.1700764 | up | cystatin C                                                    |
| 8101587 | MAPK10           | 1.1695263 | up | mitogen-activated protein kinase 10                           |
| 8126853 | C6orf138         | 1.1682895 | up | chromosome 6 open reading frame 138                           |
| 8038655 | KLK4             | 1.1665795 | up | kallikrein-related peptidase 4                                |
| 8009353 | PITPNC1          | 1.1662353 | up | phosphatidylinositol transfer protein, cytoplasmic 1          |
| 8137257 | GIMAP5           | 1.1652551 | up | GTPase, IMAP family member 5                                  |
| 8113726 | PPIC             | 1.1636559 | up | peptidylprolyl isomerase C (cyclophilin C)                    |
| 7914270 | LAPTM5           | 1.1610736 | up | lysosomal associated multispinning membrane protein 5         |
| 8138930 | RP9P             | 1.1596901 | up | retinitis pigmentosa 9 pseudogene                             |
| 7958000 | CHPT1            | 1.1590838 | up | choline phosphotransferase 1                                  |
| 8101624 | KLHL8            | 1.1579603 | up | kelch-like 8 (Drosophila)                                     |
| 8171762 | RPS6KA3          | 1.156728  | up | ribosomal protein S6 kinase, 90kDa, polypeptide 3             |
| 7980547 | SEL1L            | 1.1564127 | up | sel-1 suppressor of lin-12-like (C. elegans)                  |
| 7947496 | SLC1A2           | 1.1552231 | up | solute carrier family 1 (glial high affinity glutamate transp |
| 7995907 | CETP             | 1.1530349 | up | cholesteryl ester transfer protein, plasma                    |
| 8178489 | HLA-C XXbac-BPG1 | 1.15298   | up | major histocompatibility complex, class I, C   MHC class I    |

Supplemental Table 1a  
eMSC vs. eEP

|         |                  |           |    |                                                            |
|---------|------------------|-----------|----|------------------------------------------------------------|
| 7902074 | LEPR LEPROT      | 1.152524  | up | leptin receptor   leptin receptor overlapping transcript   |
| 8099218 | PPP2R2C          | 1.1523161 | up | protein phosphatase 2 (formerly 2A), regulatory subunit B  |
| 8146934 | LY96             | 1.152137  | up | lymphocyte antigen 96                                      |
| 7923453 | JARID1B          | 1.148511  | up | jumonji, AT rich interactive domain 1B                     |
| 7996954 | NFAT5            | 1.1481563 | up | nuclear factor of activated T-cells 5, tonicity-responsive |
| 8132055 | C7orf41          | 1.1475054 | up | chromosome 7 open reading frame 41                         |
| 7950933 | NOX4             | 1.1469808 | up | NADPH oxidase 4                                            |
| 8098214 | TLL1             | 1.1469355 | up | tolloid-like 1                                             |
| 8131205 | SDK1             | 1.1465801 | up | sidekick homolog 1, cell adhesion molecule (chicken)       |
| 7922846 | FAM129A          | 1.1464074 | up | family with sequence similarity 129, member A              |
| 7978712 | CLEC14A          | 1.1435224 | up | C-type lectin domain family 14, member A                   |
| 7969916 | BIVM             | 1.1433336 | up | basic, immunoglobulin-like variable motif containing       |
| 7952453 | ROBO4            | 1.1430576 | up | roundabout homolog 4, magic roundabout (Drosophila)        |
| 8169603 | LONRF3           | 1.1423532 | up | LON peptidase N-terminal domain and ring finger 3          |
| 7923662 | PIK3C2B          | 1.1415364 | up | phosphoinositide-3-kinase, class 2, beta polypeptide       |
| 8128650 | SEC63            | 1.1415106 | up |                                                            |
| 8124901 | HLA-C XXbac-BPG1 | 1.1413704 | up | major histocompatibility complex, class I, C   MHC class I |
| 8079198 | ZNF660           | 1.141202  | up | zinc finger protein 660                                    |
| 8080344 | STAB1            | 1.1408857 | up | stabilin 1                                                 |
| 8069744 | RWDD2B           | 1.1397637 | up | RWD domain containing 2B                                   |
| 8145766 | MST131           | 1.1394179 | up | MSTP131                                                    |
| 8017210 | AP1S2 LOC653653  | 1.1390878 | up | adaptor-related protein complex 1, sigma 2 subunit   hyp   |
| 7929536 | CC2D2B LOC10013  | 1.138432  | up | coiled-coil and C2 domain containing 2B   hypothetical pr  |
| 8033362 | INSR             | 1.1373404 | up | insulin receptor                                           |
| 7951408 | COP1             | 1.1371324 | up | caspase-1 dominant-negative inhibitor pseudo-ICE           |
| 8180166 | TAPBP            | 1.1368719 | up | TAP binding protein (tapasin)                              |
| 8070411 | C21orf88 LOC1001 | 1.1361749 | up | chromosome 21 open reading frame 88   similar to C21or     |
| 7964987 | KCNC2            | 1.135062  | up | potassium voltage-gated channel, Shaw-related subfamily    |
| 7928491 | MYST4            | 1.1343415 | up | MYST histone acetyltransferase (monocytic leukemia) 4      |
| 7961111 | CLEC1A           | 1.133947  | up | C-type lectin domain family 1, member A                    |
| 8059279 | EPHA4            | 1.1338499 | up | EPH receptor A4                                            |
| 8114780 | PCDH12           | 1.132214  | up | protocadherin 12                                           |
| 8020973 | FHOD3            | 1.1316191 | up | formin homology 2 domain containing 3                      |

Supplemental Table 1a  
eMSC vs. eEP

|         |             |           |    |                                                             |
|---------|-------------|-----------|----|-------------------------------------------------------------|
| 8173059 | WNK3        | 1.131248  | up | WNK lysine deficient protein kinase 3                       |
| 8111772 | DAB2        | 1.1306509 | up | disabled homolog 2, mitogen-responsive phosphoprotein       |
| 8009502 | KCNJ2       | 1.1301936 | up | potassium inwardly-rectifying channel, subfamily J, memb    |
| 8008185 | ABI3        | 1.1287409 | up | ABI gene family, member 3                                   |
| 7964602 | LRIG3       | 1.1287314 | up | leucine-rich repeats and immunoglobulin-like domains 3      |
| 8070819 | PTTG1P      | 1.126918  | up | pituitary tumor-transforming 1 interacting protein          |
| 7915286 | PPT1        | 1.1266754 | up | palmitoyl-protein thioesterase 1 (ceroid-lipofuscinosis, ne |
| 8056943 | KIAA1715    | 1.1232297 | up |                                                             |
| 8082597 | COL6A6      | 1.1230943 | up | collagen type VI alpha 6                                    |
| 8117120 | ID4         | 1.1228985 | up | inhibitor of DNA binding 4, dominant negative helix-loop-l  |
| 8168622 | KLHL4       | 1.1224619 | up | kelch-like 4 (Drosophila)                                   |
| 8038163 | RASIP1      | 1.1222223 | up | Ras interacting protein 1                                   |
| 8142471 | WNT2        | 1.1216063 | up | wingless-type MMTV integration site family member 2         |
| 7933877 | JMJD1C      | 1.1212856 | up | jumonji domain containing 1C                                |
| 7971565 | P2RY5       | 1.1205043 | up | purinergic receptor P2Y, G-protein coupled, 5               |
| 7926451 | MRC1 MRC1L1 | 1.1203061 | up | mannose receptor, C type 1   mannose receptor, C type 1     |
| 8074131 | SHANK3      | 1.119677  | up | SH3 and multiple ankyrin repeat domains 3                   |
| 7926410 | MRC1 MRC1L1 | 1.1193243 | up | mannose receptor, C type 1   mannose receptor, C type 1     |
| 7918457 | KCNA3       | 1.1190807 | up | potassium voltage-gated channel, shaker-related subfamil    |
| 8179034 | HLA-G HLA-A | 1.1190083 | up | major histocompatibility complex, class I, G   major histoc |
| 7982854 | DLL4        | 1.1185601 | up | delta-like 4 (Drosophila)                                   |
| 8034227 | RGL3        | 1.1185179 | up | ral guanine nucleotide dissociation stimulator-like 3       |
| 8029465 | BCL3        | 1.1181731 | up | B-cell CLL/lymphoma 3                                       |
| 8177725 | HLA-G HLA-A | 1.1181476 | up | major histocompatibility complex, class I, G   major histoc |
| 7939341 | CD44        | 1.117627  | up |                                                             |
| 7926239 | OPTN        | 1.1174141 | up | optineurin                                                  |
| 7946641 | GALNTL4     | 1.1169469 | up | UDP-N-acetyl-alpha-D-galactosamine:polypeptide N-acety      |
| 8112822 | DMGDH       | 1.1167421 | up | dimethylglycine dehydrogenase                               |
| 7985044 | UBE2Q2      | 1.1154053 | up | ubiquitin-conjugating enzyme E2Q family member 2            |
| 8123246 | SLC22A3     | 1.113727  | up | solute carrier family 22 (extraneuronal monoamine transp    |
| 8143781 | GIMAP6      | 1.1122766 | up | GTPase, IMAP family member 6                                |
| 7920506 | SHE         | 1.1105938 | up | Src homology 2 domain containing E                          |
| 8154295 | IL33        | 1.1098799 | up | interleukin 33                                              |



Supplemental Table 1a  
eMSC vs. eEP

|         |                  |           |    |                                                                   |
|---------|------------------|-----------|----|-------------------------------------------------------------------|
| 7903893 | CD53             | 1.1094248 | up |                                                                   |
| 7929525 | LOC100127889     | 1.1092646 | up |                                                                   |
| 8105828 | CCNB1            | 1.1091349 | up | cyclin B1                                                         |
| 8178977 | TAPBP            | 1.1082605 | up | TAP binding protein (tapasin)                                     |
| 8060765 | PRND             | 1.1082317 | up | prion protein 2 (dublet)                                          |
| 8010078 | SNORD1C          | 1.1057247 | up | small nucleolar RNA, C/D box 1C                                   |
| 7931097 | HTRA1            | 1.1040177 | up | HtrA serine peptidase 1                                           |
| 8121749 | GJA1             | 1.1035298 | up | gap junction protein, alpha 1, 43kDa                              |
| 8004955 | LOC284033        | 1.1024567 | up |                                                                   |
| 8114653 | TAF7             | 1.1013014 | up |                                                                   |
| 8157487 | PAPPA            | 1.101031  | up | pregnancy-associated plasma protein A, pappalysin 1               |
| 7943398 | YAP1             | 1.0999944 | up | Yes-associated protein 1, 65kDa                                   |
| 8166355 | CNKSR2           | 1.0998749 | up | connector enhancer of kinase suppressor of Ras 2                  |
| 8146625 | NKAIN3           | 1.0978614 | up | Na <sup>+</sup> /K <sup>+</sup> transporting ATPase interacting 3 |
| 7971486 | C13orf18 LOC7289 | 1.097079  | up | chromosome 13 open reading frame 18   hypothetical LO             |
| 8042519 | PCYOX1           | 1.096842  | up | prenylcysteine oxidase 1                                          |
| 8100382 | CHIC2            | 1.095617  | up | cysteine-rich hydrophobic domain 2                                |
| 8062557 | PPP1R16B         | 1.0952356 | up | protein phosphatase 1, regulatory (inhibitor) subunit 16B         |
| 7929533 | CC2D2B LOC10013  | 1.0926914 | up | coiled-coil and C2 domain containing 2B   hypothetical pr         |
| 8049246 | INPP5D           | 1.0925627 | up | inositol polyphosphate-5-phosphatase, 145kDa                      |
| 8132860 | EGFR             | 1.0909194 | up | epidermal growth factor receptor (erythroblastic leukemia)        |
| 8138977 | DPY19L1          | 1.090303  | up | dpy-19-like 1 (C. elegans)                                        |
| 8111739 | FYB              | 1.0865718 | up |                                                                   |
| 8042402 | C2orf13 PROKR1   | 1.0852361 | up | chromosome 2 open reading frame 13   prokineticin rece            |
| 8023575 | CCBE1            | 1.0846729 | up | collagen and calcium binding EGF domains 1                        |
| 8057377 | CCDC141 LOC2850  | 1.0839792 | up | coiled-coil domain containing 141   hypothetical protein L        |
| 8116859 | TMEM14C          | 1.0836254 | up | transmembrane protein 14C                                         |
| 8019643 | DOC2B            | 1.0814595 | up | double C2-like domains, beta                                      |
| 8060758 | PRNP             | 1.0812738 | up | prion protein (p27-30) (Creutzfeldt-Jakob disease, Gerstm         |
| 7946454 | SCUBE2           | 1.080315  | up | signal peptide, CUB domain, EGF-like 2                            |
| 7943442 | DYNC2H1          | 1.080222  | up | dynein, cytoplasmic 2, heavy chain 1                              |
| 8137232 | GIMAP8           | 1.0791861 | up | GTPase, IMAP family member 8                                      |
| 8104394 | ADCY2            | 1.078592  | up | adenylate cyclase 2 (brain)                                       |

Supplemental Table 1a  
eMSC vs. eEP

|         |                   |           |    |                                                             |
|---------|-------------------|-----------|----|-------------------------------------------------------------|
| 8121569 | FLJ34503          | 1.0782439 | up |                                                             |
| 8121392 | C6orf182 C6orf182 | 1.0780228 | up | chromosome 6 open reading frame 182   chromosome 6          |
| 8103951 | ACSL1             | 1.0779812 | up | acyl-CoA synthetase long-chain family member 1              |
| 7905881 | ADAM15            | 1.0777858 | up | ADAM metallopeptidase domain 15                             |
| 7980246 | MLH3              | 1.0774862 | up | mutL homolog 3 (E. coli)                                    |
| 7986092 | FURIN             | 1.0739028 | up | furin (paired basic amino acid cleaving enzyme)             |
| 8037505 | TRAPPC6A          | 1.0732433 | up | trafficking protein particle complex 6A                     |
| 7932285 | C10orf97          | 1.072957  | up | chromosome 10 open reading frame 97                         |
| 8062748 | IFT52             | 1.0728487 | up | intraflagellar transport 52 homolog (Chlamydomonas)         |
| 8078360 | STT3B             | 1.0726222 | up | STT3, subunit of the oligosaccharyltransferase complex, h   |
| 8083090 | ZBTB38            | 1.0724565 | up | zinc finger and BTB domain containing 38                    |
| 7997396 | ATMIN             | 1.0717317 | up | ATM interactor                                              |
| 7976084 | SPATA7            | 1.0700438 | up | spermatogenesis associated 7                                |
| 8080781 | PXK               | 1.0698822 | up | PX domain containing serine/threonine kinase                |
| 7954388 | GOLT1B            | 1.0696388 | up | golgi transport 1 homolog B (S. cerevisiae)                 |
| 8004255 | BCL6B             | 1.0684698 | up | B-cell CLL/lymphoma 6, member B (zinc finger protein)       |
| 7943620 | ATM NPAT          | 1.0682803 | up | ataxia telangiectasia mutated   nuclear protein, ataxia-tel |
| 7991216 | DET1              | 1.067839  | up | de-etiolated homolog 1 (Arabidopsis)                        |
| 8097628 | HHIP              | 1.0672698 | up | hedgehog interacting protein                                |
| 7950544 | PRKRIR            | 1.0659505 | up | protein-kinase, interferon-inducible double stranded RNA    |
| 8125383 | NOTCH4 GPSM3      | 1.0655469 | up | Notch homolog 4 (Drosophila)   G-protein signaling modu     |
| 7995797 | MT1E              | 1.0650668 | up | metallothionein 1E                                          |
| 7922200 | SELP              | 1.06423   | up | selectin P (granule membrane protein 140kDa, antigen CD     |
| 8096771 | DC2               | 1.0638107 | up |                                                             |
| 8132725 | UPP1              | 1.0627799 | up | uridine phosphorylase 1                                     |
| 7916185 | ZCCHC11           | 1.0619105 | up | zinc finger, CCHC domain containing 11                      |
| 8091354 | HLTF              | 1.0618551 | up | helicase-like transcription factor                          |
| 8014349 | CCL14 CCL15       | 1.0611529 | up | chemokine (C-C motif) ligand 14   chemokine (C-C motif) l   |
| 7929282 | HHEX              | 1.0611184 | up | hematopoietically expressed homeobox                        |
| 7900395 | RLF               | 1.0608078 | up | rearranged L-myc fusion                                     |
| 8069574 | C21orf91          | 1.0608062 | up | chromosome 21 open reading frame 91                         |
| 7903565 | GPSM2             | 1.0607222 | up | G-protein signaling modulator 2 (AGS3-like, C. elegans)     |
| 8105061 | FYB               | 1.0603098 | up |                                                             |

Supplemental Table 1a  
eMSC vs. eEP

|         |                  |           |    |                                                              |
|---------|------------------|-----------|----|--------------------------------------------------------------|
| 7994280 | IL4R             | 1.0601845 | up | interleukin 4 receptor                                       |
| 7899750 | C1orf90          | 1.0599947 | up | chromosome 1 open reading frame 90                           |
| 8037430 | ZNF404           | 1.0599301 | up | zinc finger protein 404                                      |
| 8131583 | BZW2             | 1.0595874 | up | basic leucine zipper and W2 domains 2                        |
| 8117777 | HLA-G HLA-A HLA- | 1.0591531 | up | major histocompatibility complex, class I, G   major histoc  |
| 7977497 | CCNB1IP1         | 1.0563238 | up | cyclin B1 interacting protein 1                              |
| 8175076 | ZNF280C          | 1.0546824 | up | zinc finger protein 280C                                     |
| 8005809 | LGALS9           | 1.0522342 | up | lectin, galactoside-binding, soluble, 9 (galectin 9)         |
| 8122865 | VIP              | 1.0515262 | up | vasoactive intestinal peptide                                |
| 8112841 | HOMER1           | 1.0504162 | up | homer homolog 1 (Drosophila)                                 |
| 8156919 | MURC             | 1.0503144 | up | muscle-restricted coiled-coil protein                        |
| 8137483 | FLJ16734         | 1.0501323 | up | hypothetical LOC641928                                       |
| 8020898 | ZNF271           | 1.0494194 | up | zinc finger protein 271                                      |
| 7906435 | DARC             | 1.0489006 | up | Duffy blood group, chemokine receptor                        |
| 8156575 | ATMIN            | 1.0484099 | up | ATM interactor                                               |
| 7946275 | GVIN1            | 1.0474993 | up | GTPase, very large interferon inducible 1                    |
| 8055952 | NR4A2            | 1.0472345 | up | nuclear receptor subfamily 4, group A, member 2              |
| 7997427 | CMIP             | 1.0470752 | up | c-Maf-inducing protein                                       |
| 7903393 | S1PR1            | 1.045497  | up | sphingosine-1-phosphate receptor 1                           |
| 7902861 | LRRC8B           | 1.0444772 | up | leucine rich repeat containing 8 family, member B            |
| 8105778 | PIK3R1           | 1.0434889 | up | phosphoinositide-3-kinase, regulatory subunit 1 (alpha)      |
| 7939137 | EIF3M            | 1.043402  | up | eukaryotic translation initiation factor 3, subunit M        |
| 8111998 | HCN1             | 1.0433987 | up | hyperpolarization activated cyclic nucleotide-gated potass   |
| 7905339 | MGC29891         | 1.0424936 | up |                                                              |
| 8144786 | SLC7A2           | 1.0410416 | up | solute carrier family 7 (cationic amino acid transporter, y+ |
| 7990714 | CHRNA3           | 1.0409076 | up | cholinergic receptor, nicotinic, alpha 3                     |
| 7901426 | ZFYVE9           | 1.0393485 | up | zinc finger, FYVE domain containing 9                        |
| 8050608 | C2orf43          | 1.0391083 | up | chromosome 2 open reading frame 43                           |
| 8110147 | C5orf25          | 1.0390276 | up | chromosome 5 open reading frame 25                           |
| 8135363 | PIK3CG           | 1.0384835 | up | phosphoinositide-3-kinase, catalytic, gamma polypeptide      |
| 7917283 | MCOLN2           | 1.0377162 | up | mucolipin 2                                                  |
| 7930380 | ADD3             | 1.0361836 | up | adducin 3 (gamma)                                            |
| 8066822 | SULF2            | 1.0355225 | up | sulfatase 2                                                  |

Supplemental Table 1a  
eMSC vs. eEP

|         |                |           |    |                                                                                       |
|---------|----------------|-----------|----|---------------------------------------------------------------------------------------|
| 8038029 | CARD8          | 1.0351881 | up | caspase recruitment domain family, member 8                                           |
| 8052731 | WDR92          | 1.0348538 | up | WD repeat domain 92                                                                   |
| 8128683 | SNX3           | 1.0343161 | up | sorting nexin 3                                                                       |
| 8109912 | KCNIP1         | 1.0336957 | up | Kv channel interacting protein 1                                                      |
| 8129677 | SGK1           | 1.033361  | up | serum/glucocorticoid regulated kinase 1                                               |
| 8057887 | STK17B         | 1.0331534 | up | serine/threonine kinase 17b                                                           |
| 8175492 | ATP11C         | 1.0325606 | up | ATPase, class VI, type 11C                                                            |
| 8044919 | RALB           | 1.0323721 | up | v-ral simian leukemia viral oncogene homolog B (ras related)                          |
| 8124307 | CMAH           | 1.0311133 | up | cytidine monophosphate-N-acetylneuraminic acid hydroxylase                            |
| 7943498 | DYNC2H1        | 1.0308558 | up | dynein, cytoplasmic 2, heavy chain 1                                                  |
| 7965956 | NFYB           | 1.0306685 | up | nuclear transcription factor Y, beta                                                  |
| 8001531 | MT1G           | 1.0301051 | up | metallothionein 1G                                                                    |
| 7953924 | CLEC9A         | 1.0298265 | up | C-type lectin domain family 9, member A                                               |
| 7899160 | CD52           | 1.0290067 | up |                                                                                       |
| 8145977 | PLEKHA2        | 1.0278245 | up | pleckstrin homology domain containing, family A (phosphoinositide dependent kinase-1) |
| 8156848 | NR4A3          | 1.0275431 | up | nuclear receptor subfamily 4, group A, member 3                                       |
| 7960411 | C12orf4        | 1.0272794 | up | chromosome 12 open reading frame 4                                                    |
| 7926875 | BAMBI          | 1.0269666 | up | BMP and activin membrane-bound inhibitor homolog (Xenopus)                            |
| 7998952 | TIGD7          | 1.0269182 | up | tigger transposable element derived 7                                                 |
| 7949454 | MAP3K11        | 1.026104  | up | mitogen-activated protein kinase kinase kinase 11                                     |
| 7956697 | MON2           | 1.0254987 | up |                                                                                       |
| 7951271 | MMP1           | 1.0203469 | up | matrix metalloproteinase 1 (interstitial collagenase)                                 |
| 7971813 | THSD1          | 1.0197326 | up | thrombospondin, type I, domain containing 1                                           |
| 8111153 | MYO10          | 1.0196205 | up | myosin X                                                                              |
| 8061247 | RIN2           | 1.0188884 | up | Ras and Rab interactor 2                                                              |
| 7967002 | PXN            | 1.018856  | up | paxillin                                                                              |
| 8157246 | KIAA1958       | 1.016342  | up |                                                                                       |
| 8167592 | PAGE4          | 1.0160311 | up | P antigen family, member 4 (prostate associated)                                      |
| 8056545 | STK39          | 1.0157199 | up | serine threonine kinase 39 (STE20/SPS1 homolog, yeast)                                |
| 8034342 | ZNF625   ZNF20 | 1.0155596 | up | zinc finger protein 625   zinc finger protein 20                                      |
| 7942964 | TMEM135        | 1.015337  | up | transmembrane protein 135                                                             |
| 8075569 | SLC5A4         | 1.0151366 | up | solute carrier family 5 (low affinity glucose cotransporter)                          |
| 8120613 | RIMS1          | 1.0147535 | up | regulating synaptic membrane exocytosis 1                                             |

Supplemental Table 1a  
eMSC vs. eEP

|         |                  |            |      |                                                              |
|---------|------------------|------------|------|--------------------------------------------------------------|
| 8103789 | GPM6A            | 1.0143462  | up   | glycoprotein M6A                                             |
| 8156263 | SPIN1            | 1.0141531  | up   | spindlin 1                                                   |
| 8035304 | BST2             | 1.0129316  | up   | bone marrow stromal cell antigen 2                           |
| 8173217 | ARHGEF9          | 1.0122744  | up   | Cdc42 guanine nucleotide exchange factor (GEF) 9             |
| 8138454 | TWISTNB          | 1.0094198  | up   | TWIST neighbor                                               |
| 8179041 | HLA-A HLA-H HLA- | 1.008796   | up   | major histocompatibility complex, class I, A   major histoc  |
| 7917304 | MCOLN3           | 1.008474   | up   | mucolipin 3                                                  |
| 8148124 | MTBP             | 1.0079249  | up   | Mdm2, transformed 3T3 cell double minute 2, p53 binding      |
| 8162388 | OMD              | 1.0076872  | up   | osteomodulin                                                 |
| 7952341 | ASAM             | 1.0067987  | up   | adipocyte-specific adhesion molecule                         |
| 8095110 | KIT              | 1.0062107  | up   | v-kit Hardy-Zuckerman 4 feline sarcoma viral oncogene hc     |
| 8054766 | bA395L14.13      | 1.0056667  | up   | acrosin-like protease                                        |
| 8017597 | hCG_1793136      | 1.0054761  | up   | similar to ribosomal protein L31                             |
| 8060988 | BTBD3            | 1.0049121  | up   | BTB (POZ) domain containing 3                                |
| 7965060 | BBS10            | 1.0038494  | up   | Bardet-Biedl syndrome 10                                     |
| 8098263 | PALLD            | 1.003806   | up   | palladin, cytoskeletal associated protein                    |
| 8178498 | HLA-B HLA-C XXba | 1.0017506  | up   | major histocompatibility complex, class I, B   major histoc  |
| 7916669 | DOCK7            | 1.0014141  | up   | dedicator of cytokinesis 7                                   |
| 8080964 | GLT8D4           | 1.0013046  | up   | glycosyltransferase 8 domain containing 4                    |
| 7972239 | SLITRK6          | 1.0002923  | up   | SLIT and NTRK-like family, member 6                          |
| 8114287 | SPOCK1           | -1.0003262 | down | sparc/osteonectin, cwcv and kazal-like domains proteogly     |
| 8172698 | SHROOM4          | -1.0022463 | down | shroom family member 4                                       |
| 8068361 | SLC5A3           | -1.0022811 | down | solute carrier family 5 (inositol transporters), member 3    |
| 8160260 | BNC2             | -1.0023329 | down | basonuclin 2                                                 |
| 7939158 | QSER1            | -1.0039887 | down | glutamine and serine rich 1                                  |
| 8068713 | MX1              | -1.0047777 | down | myxovirus (influenza virus) resistance 1, interferon-inducib |
| 8111993 | FGF10            | -1.0055721 | down | fibroblast growth factor 10                                  |
| 7995793 | MT1L             | -1.0056576 | down | metallothionein 1L (gene/pseudogene)                         |
| 8087485 | UBA7             | -1.0067507 | down | ubiquitin-like modifier activating enzyme 7                  |
| 8031640 | ZNF583           | -1.0072265 | down | zinc finger protein 583                                      |
| 7977615 | RNASE1           | -1.0075938 | down | ribonuclease, RNase A family, 1 (pancreatic)                 |
| 8117813 | HLA-H HLA-A HLA- | -1.0078427 | down | major histocompatibility complex, class I, H (pseudogene)    |
| 8142415 | FLJ31818         | -1.0083368 | down |                                                              |

Supplemental Table 1a  
eMSC vs. eEP

|         |                  |            |      |                                                               |
|---------|------------------|------------|------|---------------------------------------------------------------|
| 7914218 | TAF12            | -1.0114684 | down |                                                               |
| 7977409 | CRIP1 LOC1001279 | -1.0120811 | down | cysteine-rich protein 1 (intestinal)   hypothetical protein I |
| 8013860 | MYO18A TIAF1     | -1.0133947 | down | myosin XVIIIa   TGFB1-induced anti-apoptotic factor 1         |
| 7977621 | NDRG2            | -1.0142537 | down | NDRG family member 2                                          |
| 7934870 | ATAD1            | -1.0143111 | down | ATPase family, AAA domain containing 1                        |
| 8077198 | FLJ43315         | -1.0148536 | down | similar to Asparagine synthetase [glutamine-hydrolyzing]      |
| 8054479 | MALL             | -1.0152537 | down | mal, T-cell differentiation protein-like                      |
| 7912145 | TNFRSF9          | -1.015933  | down | tumor necrosis factor receptor superfamily, member 9          |
| 7951351 | PDGFD            | -1.0164747 | down | platelet derived growth factor D                              |
| 8055688 | RND3             | -1.0172999 | down | Rho family GTPase 3                                           |
| 7918255 | CLCC1            | -1.0200593 | down | chloride channel CLIC-like 1                                  |
| 8081959 | STXBP5L          | -1.0203412 | down | syntaxin binding protein 5-like                               |
| 8068202 | C21orf63         | -1.0205954 | down | chromosome 21 open reading frame 63                           |
| 8179731 | HLA-B HLA-C XXba | -1.0222505 | down | major histocompatibility complex, class I, B   major histoc   |
| 8113773 | ALDH7A1          | -1.0226761 | down | aldehyde dehydrogenase 7 family, member A1                    |
| 8103341 | MAP9             | -1.0228847 | down | microtubule-associated protein 9                              |
| 7972369 | UGCGL2           | -1.024177  | down | UDP-glucose ceramide glucosyltransferase-like 2               |
| 7909730 | KCNK2            | -1.0266643 | down | potassium channel, subfamily K, member 2                      |
| 7923991 | PLXNA2           | -1.0280216 | down | plexin A2                                                     |
| 7939411 | C11orf74         | -1.0281214 | down | chromosome 11 open reading frame 74                           |
| 8119898 | VEGFA            | -1.0302317 | down | vascular endothelial growth factor A                          |
| 8122464 | UTRN             | -1.0314653 | down | utrophin                                                      |
| 8121768 | PKIB             | -1.0337543 | down | protein kinase (cAMP-dependent, catalytic) inhibitor beta     |
| 8102342 | ELOVL6           | -1.0340794 | down | ELOVL family member 6, elongation of long chain fatty aci     |
| 7965510 | TMCC3            | -1.035081  | down | transmembrane and coiled-coil domain family 3                 |
| 8154512 | ADAMTSL1         | -1.0358821 | down | ADAMTS-like 1                                                 |
| 8162313 | IARS             | -1.0376608 | down | isoleucyl-tRNA synthetase                                     |
| 8143065 | C7orf49          | -1.0411485 | down | chromosome 7 open reading frame 49                            |
| 8050507 | WDR35            | -1.0416186 | down | WD repeat domain 35                                           |
| 8076355 | PMM1             | -1.042349  | down | phosphomannomutase 1                                          |
| 8088803 | EIF4E3           | -1.0424067 | down | eukaryotic translation initiation factor 4E family member :   |
| 8124911 | HLA-B XXbac-BPG1 | -1.0438244 | down | major histocompatibility complex, class I, B   MHC class I    |
| 7926037 | PFKFB3           | -1.0438986 | down | 6-phosphofructo-2-kinase/fructose-2,6-biphosphatase 3         |

Supplemental Table 1a  
eMSC vs. eEP

|         |              |            |      |                                                             |
|---------|--------------|------------|------|-------------------------------------------------------------|
| 7925457 | RGS7         | -1.0439577 | down | regulator of G-protein signaling 7                          |
| 8063536 | TFAP2C       | -1.0467259 | down | transcription factor AP-2 gamma (activating enhancer bini   |
| 8073015 | KDEL3        | -1.0467561 | down | KDEL (Lys-Asp-Glu-Leu) endoplasmic reticulum protein ret    |
| 7907893 | MR1          | -1.0483043 | down | major histocompatibility complex, class I-related           |
| 8073662 | PARVB        | -1.0493209 | down | parvin, beta                                                |
| 8113733 | CCDC100      | -1.0517426 | down | coiled-coil domain containing 100                           |
| 8106516 | JMY          | -1.0518099 | down | junction-mediating and regulatory protein                   |
| 8068353 | SLC5A3 MRPS6 | -1.052037  | down | solute carrier family 5 (inositol transporters), member 3   |
| 8004842 | ARHGEF15     | -1.0529537 | down | Rho guanine nucleotide exchange factor (GEF) 15             |
| 8042942 | HK2          | -1.0535498 | down | hexokinase 2                                                |
| 8178419 | FLOT1        | -1.0545422 | down | flotillin 1                                                 |
| 8131631 | HDAC9        | -1.0552    | down | histone deacetylase 9                                       |
| 8093145 | C3orf34      | -1.0554159 | down | chromosome 3 open reading frame 34                          |
| 7999387 | EMP2         | -1.0572796 | down | epithelial membrane protein 2                               |
| 8124828 | FLOT1        | -1.0579566 | down | flotillin 1                                                 |
| 8044225 | SULT1C4      | -1.0580063 | down | sulfotransferase family, cytosolic, 1C, member 4            |
| 8178211 | PSMB9        | -1.0584898 | down | proteasome (prosome, macropain) subunit, beta type, 9 (l    |
| 8122365 | GPR126       | -1.0597464 | down | G protein-coupled receptor 126                              |
| 8056611 | LRP2         | -1.060351  | down | low density lipoprotein-related protein 2                   |
| 8151066 | ARMC1        | -1.0603888 | down | armadillo repeat containing 1                               |
| 8068583 | KCNJ15       | -1.0609354 | down | potassium inwardly-rectifying channel, subfamily J, memb    |
| 7936871 | OAT          | -1.0615324 | down | ornithine aminotransferase (gyrate atrophy)                 |
| 8123274 | MAP3K4       | -1.0620213 | down | mitogen-activated protein kinase kinase kinase 4            |
| 8179688 | FLOT1        | -1.0625035 | down | flotillin 1                                                 |
| 8077441 | BHLHB2       | -1.064929  | down | basic helix-loop-helix domain containing, class B, 2        |
| 8083471 | SGEF         | -1.0659019 | down | Src homology 3 domain-containing guanine nucleotide exi     |
| 8179495 | PSMB9        | -1.0659635 | down | proteasome (prosome, macropain) subunit, beta type, 9 (l    |
| 8118571 | PSMB9        | -1.0662701 | down | proteasome (prosome, macropain) subunit, beta type, 9 (l    |
| 8134257 | GNG11        | -1.066593  | down | guanine nucleotide binding protein (G protein), gamma 11    |
| 8129181 | GOPC ROS1    | -1.0680561 | down | golgi associated PDZ and coiled-coil motif containing   c-r |
| 8099593 | KCNIP4       | -1.0683935 | down | Kv channel interacting protein 4                            |
| 7956819 | RASSF3       | -1.0694687 | down | Ras association (RalGDS/AF-6) domain family member 3        |
| 8083092 | ZBTB38       | -1.0699059 | down | zinc finger and BTB domain containing 38                    |

Supplemental Table 1a  
eMSC vs. eEP

|         |                  |            |      |                                                             |
|---------|------------------|------------|------|-------------------------------------------------------------|
| 7927288 | FAM35A           | -1.0699521 | down | family with sequence similarity 35, member A                |
| 8179049 | HLA-A HLA-B HLA- | -1.0700992 | down | major histocompatibility complex, class I, A   major histoc |
| 8088680 | C3orf64          | -1.0710377 | down | chromosome 3 open reading frame 64                          |
| 8088776 | FOXP1            | -1.0715257 | down | forkhead box P1                                             |
| 8041519 | FAM82A           | -1.0717558 | down | family with sequence similarity 82, member A                |
| 8082869 | PPP2R3A          | -1.0721112 | down | protein phosphatase 2 (formerly 2A), regulatory subunit B   |
| 7922301 | MYOC             | -1.0725905 | down | myocilin, trabecular meshwork inducible glucocorticoid re   |
| 8113623 | TICAM2 TMED7     | -1.0726227 | down | toll-like receptor adaptor molecule 2   transmembrane er    |
| 8102415 | CAMK2D           | -1.0737487 | down | calcium/calmodulin-dependent protein kinase (CaM kinas      |
| 8106660 | RASGRF2          | -1.0746174 | down | Ras protein-specific guanine nucleotide-releasing factor 2  |
| 8109001 | SPINK5           | -1.0747365 | down | serine peptidase inhibitor, Kazal type 5                    |
| 7929976 | RP11-529I10.4    | -1.0761079 | down | deleted in a mouse model of primary ciliary dyskinesia      |
| 7991640 | TARSL2           | -1.0761691 | down | threonyl-tRNA synthetase-like 2                             |
| 7973756 | KIAA1333         | -1.0767127 | down |                                                             |
| 8072360 | TCN2             | -1.0771441 | down | transcobalamin II; macrocytic anemia                        |
| 8057056 | TTN              | -1.0780598 | down | titin                                                       |
| 7995838 | MT1X             | -1.0786551 | down | metallothionein 1X                                          |
| 8111490 | PRLR             | -1.0792084 | down | prolactin receptor                                          |
| 8131067 | GPR146           | -1.0796975 | down | G protein-coupled receptor 146                              |
| 7973036 | PARP2            | -1.0809883 | down | poly (ADP-ribose) polymerase family, member 2               |
| 8068522 | TTC3             | -1.0816542 | down | tetratricopeptide repeat domain 3                           |
| 8101762 | SNCA             | -1.0825005 | down | synuclein, alpha (non A4 component of amyloid precursor     |
| 8144802 | PDGFRL           | -1.0851576 | down | platelet-derived growth factor receptor-like                |
| 8144528 | TNKS             | -1.0856401 | down | tankyrase, TRF1-interacting ankyrin-related ADP-ribose pc   |
| 8157193 | ZNF483           | -1.0864087 | down | zinc finger protein 483                                     |
| 8112081 | DHX29            | -1.0874827 | down | DEAH (Asp-Glu-Ala-His) box polypeptide 29                   |
| 8115261 | CCDC69           | -1.0878115 | down | coiled-coil domain containing 69                            |
| 8102440 | ARSJ             | -1.0883831 | down | arylsulfatase family, member J                              |
| 7962151 | MGC24039         | -1.0901399 | down |                                                             |
| 7917347 | DDAH1            | -1.0918115 | down | dimethylarginine dimethylaminohydrolase 1                   |
| 8103289 | PLRG1            | -1.0920376 | down | pleiotropic regulator 1 (PRL1 homolog, Arabidopsis)         |
| 8131815 | KLHL7            | -1.0929885 | down | kelch-like 7 (Drosophila)                                   |
| 8112967 | TMEM167          | -1.0936928 | down | transmembrane protein 167                                   |



Supplemental Table 1a  
eMSC vs. eEP

|         |                    |            |      |                                                                                     |
|---------|--------------------|------------|------|-------------------------------------------------------------------------------------|
| 8116818 | BMP6               | -1.0950071 | down | bone morphogenetic protein 6                                                        |
| 7975799 | FLVCR2             | -1.0951374 | down | feline leukemia virus subgroup C cellular receptor family, member 2                 |
| 8081138 | EPHA6              | -1.0954831 | down | EPH receptor A6                                                                     |
| 8008566 | STXBP4             | -1.0962641 | down | syntaxin binding protein 4                                                          |
| 8022803 | FAM59A             | -1.0973089 | down | family with sequence similarity 59, member A                                        |
| 8017651 | SMURF2             | -1.0973854 | down | SMAD specific E3 ubiquitin protein ligase 2                                         |
| 8137250 | GIMAP2             | -1.1001049 | down | GTPase, IMAP family member 2                                                        |
| 7950796 | CREBZF             | -1.1011021 | down | CREB/ATF bZIP transcription factor                                                  |
| 8005549 | LOC400581          | -1.1020803 | down | GRB2-related adaptor protein-like                                                   |
| 8122426 | PHACTR2            | -1.1037134 | down | phosphatase and actin regulator 2                                                   |
| 8046502 | SCRN3              | -1.1046917 | down | secernin 3                                                                          |
| 7912750 | FBXO42             | -1.1051126 | down | F-box protein 42                                                                    |
| 8096116 | AGPAT9             | -1.1059242 | down | 1-acylglycerol-3-phosphate O-acyltransferase 9                                      |
| 8137240 | GIMAP7             | -1.1068612 | down | GTPase, IMAP family member 7                                                        |
| 8047174 | SLC39A10           | -1.1069373 | down | solute carrier family 39 (zinc transporter), member 10                              |
| 8169186 | TBC1D8B            | -1.1072265 | down | TBC1 domain family, member 8B (with GRAM domain)                                    |
| 8144230 | ZNF596             | -1.1078743 | down | zinc finger protein 596                                                             |
| 8135218 | LRRC17             | -1.1083145 | down | leucine rich repeat containing 17                                                   |
| 8152703 | FBXO32             | -1.1084993 | down | F-box protein 32                                                                    |
| 8115368 | NMUR2              | -1.1100628 | down | neuromedin U receptor 2                                                             |
| 8142407 | TMEM168            | -1.1101944 | down | transmembrane protein 168                                                           |
| 8157027 | NIPSNAP3B          | -1.1105568 | down | nipsnap homolog 3B (C. elegans)                                                     |
| 7936041 | ARL3               | -1.1118777 | down | ADP-ribosylation factor-like 3                                                      |
| 8091648 | SSR3               | -1.1134382 | down | signal sequence receptor, gamma (translocon-associated)                             |
| 8138834 | FKBP14             | -1.1139234 | down | FK506 binding protein 14, 22 kDa                                                    |
| 7961230 | CSDA               | -1.1141279 | down | cold shock domain protein A                                                         |
| 8149574 | CSGALNACT1         | -1.1157382 | down | chondroitin sulfate N-acetylgalactosaminyltransferase 1                             |
| 7974771 | C14orf135   LOC100 | -1.1171662 | down | chromosome 14 open reading frame 135   hypothetical protein                         |
| 8146930 | TMEM70             | -1.1186553 | down | transmembrane protein 70                                                            |
| 8046680 | PLEKHA3            | -1.1188576 | down | pleckstrin homology domain containing, family A (phosphoinositide 3-kinase binding) |
| 8139057 | ELMO1              | -1.1194639 | down | engulfment and cell motility 1                                                      |
| 7918323 | SORT1              | -1.1195252 | down | sortilin 1                                                                          |
| 8130129 | NUP43              | -1.1206653 | down | nucleoporin 43kDa                                                                   |

Supplemental Table 1a  
eMSC vs. eEP

|         |                  |            |      |                                                                |
|---------|------------------|------------|------|----------------------------------------------------------------|
| 8013319 | GRAP             | -1.1229072 | down | GRB2-related adaptor protein                                   |
| 7969179 | RNASEH2B         | -1.1229712 | down | ribonuclease H2, subunit B                                     |
| 7948896 | SNORD22 SNHG1    | -1.1230901 | down | small nucleolar RNA, C/D box 22   small nucleolar RNA ho       |
| 8048835 | C2orf33          | -1.1240065 | down | chromosome 2 open reading frame 33                             |
| 8033667 | ZNF558           | -1.1256043 | down | zinc finger protein 558                                        |
| 7981142 | CLMN             | -1.1264523 | down | calmin (calponin-like, transmembrane)                          |
| 7987192 | SLC12A6          | -1.1279472 | down | solute carrier family 12 (potassium/chloride transporters)     |
| 8147019 | C8orf70          | -1.1284109 | down | chromosome 8 open reading frame 70                             |
| 7975136 | FUT8             | -1.1287842 | down | fucosyltransferase 8 (alpha (1,6) fucosyltransferase)          |
| 7959807 | TMEM132B         | -1.1290283 | down | transmembrane protein 132B                                     |
| 8133938 | CROT             | -1.1296942 | down | carnitine O-octanoyltransferase                                |
| 7918026 | EXTL2            | -1.1303434 | down | exostoses (multiple)-like 2                                    |
| 8084717 | ST6GAL1          | -1.1327735 | down | ST6 beta-galactosamide alpha-2,6-sialyltransferase 1           |
| 8129562 | CTGF             | -1.1330503 | down | connective tissue growth factor                                |
| 8029437 | PVR              | -1.1332978 | down | poliovirus receptor                                            |
| 8096301 | SPP1             | -1.1337478 | down | secreted phosphoprotein 1 (osteopontin, bone sialoprotei       |
| 8124622 | ZNF311           | -1.1343168 | down | zinc finger protein 311                                        |
| 8013788 | FLOT2            | -1.1351519 | down | flotillin 2                                                    |
| 8040292 | GREB1            | -1.135626  | down |                                                                |
| 7924351 | EPRS             | -1.1364328 | down | glutamyl-prolyl-tRNA synthetase                                |
| 8138842 | NOD1             | -1.1366601 | down | nucleotide-binding oligomerization domain containing 1         |
| 8107234 | MAN2A1           | -1.137101  | down | mannosidase, alpha, class 2A, member 1                         |
| 8178275 | ZNF311           | -1.1375217 | down | zinc finger protein 311                                        |
| 8085815 | TOP2B            | -1.1378459 | down | topoisomerase (DNA) II beta 180kDa                             |
| 8143629 | OR2A9P OR2A20P   | -1.1379335 | down | olfactory receptor, family 2, subfamily A, member 9 pseuc      |
| 8102065 | BDH2             | -1.1395537 | down | 3-hydroxybutyrate dehydrogenase, type 2                        |
| 8013450 | LGALS9 LOC284194 | -1.1400082 | down | lectin, galactoside-binding, soluble, 9 (galectin 9)   galecti |
| 7964701 | GNS              | -1.1409631 | down | glucosamine (N-acetyl)-6-sulfatase (Sanfilippo disease IIID    |
| 8149590 | LOC100130604     | -1.141059  | down |                                                                |
| 8011945 | KIAA0753         | -1.1416118 | down |                                                                |
| 8146550 | SDCBP            | -1.1424357 | down | syndecan binding protein (syntenin)                            |
| 8136177 | KIAA0265         | -1.1430203 | down |                                                                |
| 7927267 | FAM35A           | -1.1457653 | down | family with sequence similarity 35, member A                   |

Supplemental Table 1a  
eMSC vs. eEP

|         |                  |            |      |                                                           |
|---------|------------------|------------|------|-----------------------------------------------------------|
| 7964872 | PTPRB            | -1.1466012 | down | protein tyrosine phosphatase, receptor type, B            |
| 8179704 | IER3             | -1.1472031 | down | immediate early response 3                                |
| 8089911 | HCLS1            | -1.1483791 | down | hematopoietic cell-specific Lyn substrate 1               |
| 8098556 | CCDC111          | -1.1487561 | down | coiled-coil domain containing 111                         |
| 8124848 | IER3             | -1.1493039 | down | immediate early response 3                                |
| 7909862 | C1orf115         | -1.1495024 | down | chromosome 1 open reading frame 115                       |
| 7933092 | ZNF248           | -1.1499296 | down | zinc finger protein 248                                   |
| 8164810 | RALGDS           | -1.1504844 | down | ral guanine nucleotide dissociation stimulator            |
| 7980958 | LGMN             | -1.1511449 | down | legumain                                                  |
| 8168179 | DLG3             | -1.1511985 | down | discs, large homolog 3 (neuroendocrine-dlg, Drosophila)   |
| 8089203 | SEN7             | -1.1526016 | down | SUMO1/sentrin specific peptidase 7                        |
| 8125436 | HLA-DRB5 LOC100: | -1.1532885 | down |                                                           |
| 8151952 | NPAL2            | -1.1544958 | down | NIPA-like domain containing 2                             |
| 7909801 | LYPLAL1          | -1.1552556 | down | lysophospholipase-like 1                                  |
| 7965523 | NR2C1            | -1.1568432 | down | nuclear receptor subfamily 2, group C, member 1           |
| 8174029 | TAF7L            | -1.156953  | down | TAF7-like RNA polymerase II, TATA box binding protein (TI |
| 7902687 | CYR61            | -1.1579391 | down | cysteine-rich, angiogenic inducer, 61                     |
| 8138805 | CPVL             | -1.1584306 | down | carboxypeptidase, vitellogenic-like                       |
| 8094476 | TBC1D19          | -1.1596503 | down | TBC1 domain family, member 19                             |
| 8138370 | ANKMY2           | -1.161113  | down | ankyrin repeat and MYND domain containing 2               |
| 8021984 | YES1             | -1.1614934 | down | v-yes-1 Yamaguchi sarcoma viral oncogene homolog 1        |
| 8082750 | UBA5             | -1.1619861 | down | ubiquitin-like modifier activating enzyme 5               |
| 8052626 | VPS54            | -1.1621064 | down | vacuolar protein sorting 54 homolog (S. cerevisiae)       |
| 7898057 | PDPN             | -1.1624026 | down | podoplanin                                                |
| 7984704 | NEO1             | -1.1648005 | down | neogenin homolog 1 (chicken)                              |
| 8147172 | CPNE3            | -1.1648778 | down | copine III                                                |
| 8094874 | LOC402175        | -1.1656929 | down | hypothetical gene supported by AF044957; NM_004547        |
| 8152119 | NCALD            | -1.1671994 | down | neurocalcin delta                                         |
| 8075106 | TPST2            | -1.1673533 | down | tyrosylprotein sulfotransferase 2                         |
| 7930714 | ATRNL1           | -1.167797  | down | attractin-like 1                                          |
| 7950731 | PRCP             | -1.1692275 | down | prolylcarboxypeptidase (angiotensinase C)                 |
| 8068761 | ABCG1            | -1.1713853 | down | ATP-binding cassette, sub-family G (WHITE), member 1      |
| 7971124 | UFM1             | -1.1727107 | down | ubiquitin-fold modifier 1                                 |

Supplemental Table 1a  
eMSC vs. eEP

|         |                  |            |      |                                                                       |
|---------|------------------|------------|------|-----------------------------------------------------------------------|
| 8007745 | HEXIM1           | -1.1731495 | down | hexamethylene bis-acetamide inducible 1                               |
| 7915870 | ATPAF1           | -1.1739227 | down | ATP synthase mitochondrial F1 complex assembly factor 1               |
| 8078962 | EIF1B            | -1.1749271 | down | eukaryotic translation initiation factor 1B                           |
| 7949931 | SUV420H1         | -1.1762947 | down | suppressor of variegation 4-20 homolog 1 (Drosophila)                 |
| 8023646 | BCL2             | -1.1781377 | down | B-cell CLL/lymphoma 2                                                 |
| 8144726 | TUSC3            | -1.1802497 | down | tumor suppressor candidate 3                                          |
| 7973826 | NUBPL            | -1.1803997 | down | nucleotide binding protein-like                                       |
| 8005458 | LGALS9 LOC654346 | -1.181457  | down | lectin, galactoside-binding, soluble, 9 (galectin 9)   similar        |
| 7930614 | NHLRC2           | -1.1818064 | down | NHL repeat containing 2                                               |
| 7952484 | LOC219854        | -1.1823711 | down |                                                                       |
| 8055496 | LRP1B            | -1.1851009 | down | low density lipoprotein-related protein 1B (deleted in tumor)         |
| 8112865 | SERINC5          | -1.1858202 | down | serine incorporator 5                                                 |
| 8096109 | MRPS18C          | -1.1862259 | down | mitochondrial ribosomal protein S18C                                  |
| 7958352 | BTBD11           | -1.1866908 | down | BTB (POZ) domain containing 11                                        |
| 7907370 | DNM3             | -1.1872581 | down | dynamitin 3                                                           |
| 7926385 | STAM             | -1.1873544 | down | signal transducing adaptor molecule (SH3 domain and ITA)              |
| 7922137 | NME7             | -1.187367  | down | non-metastatic cells 7, protein expressed in (nucleoside-diphosphate) |
| 7974781 | PPM1A            | -1.1879582 | down | protein phosphatase 1A (formerly 2C), magnesium-dependent             |
| 7951397 | CASP1            | -1.1887298 | down | caspase 1, apoptosis-related cysteine peptidase (interleukin-1)       |
| 8178435 | IER3             | -1.1888735 | down | immediate early response 3                                            |
| 8121144 | MANEA            | -1.1903409 | down | mannosidase, endo-alpha                                               |
| 8097356 | PLK4             | -1.1904868 | down | polo-like kinase 4 (Drosophila)                                       |
| 8173955 | SYTL4            | -1.1905072 | down | synaptotagmin-like 4 (granuphilin-a)                                  |
| 8046726 | SSFA2            | -1.1912063 | down | sperm specific antigen 2                                              |
| 8085954 | AZI2             | -1.191741  | down | 5-azacytidine induced 2                                               |
| 8151999 | RGS22            | -1.191968  | down | regulator of G-protein signaling 22                                   |
| 8020267 | CEP192           | -1.1977153 | down | centrosomal protein 192kDa                                            |
| 8040163 | IAH1             | -1.2025464 | down | isoamyl acetate-hydrolyzing esterase 1 homolog (S. cerevisiae)        |
| 8123467 | C6orf70          | -1.2036824 | down | chromosome 6 open reading frame 70                                    |
| 7984517 | GLCE             | -1.2040412 | down | glucuronic acid epimerase                                             |
| 7906469 | DUSP23           | -1.2045898 | down | dual specificity phosphatase 23                                       |
| 8154128 | DSERG1           | -1.205124  | down | Down syndrome encephalopathy related protein 1                        |
| 8094190 | CC2D2A           | -1.2071165 | down | coiled-coil and C2 domain containing 2A                               |

Supplemental Table 1a  
eMSC vs. eEP

|         |           |            |      |                                                                                           |
|---------|-----------|------------|------|-------------------------------------------------------------------------------------------|
| 8051637 | DHX57     | -1.2073407 | down | DEAH (Asp-Glu-Ala-Asp/His) box polypeptide 57                                             |
| 7912292 | LZIC      | -1.2080694 | down | leucine zipper and CTNNBIP1 domain containing                                             |
| 8102938 | RNF150    | -1.2087687 | down | ring finger protein 150                                                                   |
| 7936891 | METTL10   | -1.2124538 | down | methyltransferase like 10                                                                 |
| 8128894 | REV3L     | -1.2156886 | down | REV3-like, catalytic subunit of DNA polymerase zeta (yeast variant gene 6 (TEL oncogene)) |
| 7953981 | ETV6      | -1.216876  | down | lymphoid-restricted membrane protein                                                      |
| 7954436 | LRMP      | -1.218619  | down | ADP-ribosylation factor 4                                                                 |
| 8088339 | ARF4      | -1.218634  | down | ras homolog gene family, member T1                                                        |
| 8006345 | RHOT1     | -1.2188152 | down | multiple C2 domains, transmembrane 1                                                      |
| 8113130 | MCTP1     | -1.2199246 | down | ADP-ribosylation factor-like 1                                                            |
| 7965789 | ARL1      | -1.2207946 | down | Rab15 effector protein                                                                    |
| 7954589 | REP15     | -1.2213464 | down | Src homology 2 domain containing adaptor protein B   cytochrome b5                        |
| 8161255 | SHB CKAP2 | -1.2220731 | down | HBS1-like ( <i>S. cerevisiae</i> )                                                        |
| 8129706 | HBS1L     | -1.2231332 | down | peptidylprolyl isomerase (cyclophilin)-like 3                                             |
| 8058147 | PPIL3     | -1.2254865 | down | bone morphogenetic protein receptor, type IA                                              |
| 7928855 | BMPR1A    | -1.2286855 | down | cell division cycle associated 7                                                          |
| 8046488 | CDCA7     | -1.2298441 | down |                                                                                           |
| 8097066 | KIAA1627  | -1.2304577 | down |                                                                                           |
| 8124502 | ZNF184    | -1.234252  | down | zinc finger protein 184                                                                   |
| 8126135 | GLO1      | -1.2374792 | down | glyoxalase I                                                                              |
| 7952069 | C11orf60  | -1.2377696 | down | chromosome 11 open reading frame 60                                                       |
| 8096704 | NPNT      | -1.2380562 | down | nephronectin                                                                              |
| 8166784 | TSPAN7    | -1.2430425 | down | tetraspanin 7                                                                             |
| 8042737 | ALMS1     | -1.2453402 | down | Alstrom syndrome 1                                                                        |
| 8021169 | LIPG      | -1.2459713 | down | lipase, endothelial                                                                       |
| 8100145 | COMMD8    | -1.248665  | down | COMM domain containing 8                                                                  |
| 8098006 | GLRB      | -1.2491612 | down | glycine receptor, beta                                                                    |
| 8105579 | IPO11     | -1.2495819 | down | importin 11                                                                               |
| 8100318 | SGCB      | -1.249764  | down | sarcoglycan, beta (43kDa dystrophin-associated glycoprotein)                              |
| 7968658 | EXOSC8    | -1.2512971 | down | exosome component 8                                                                       |
| 8042259 | MDH1      | -1.2529694 | down | malate dehydrogenase 1, NAD (soluble)                                                     |
| 8112121 | SLC38A9   | -1.2532167 | down | solute carrier family 38, member 9                                                        |
| 7917850 | ARHGAP29  | -1.2532715 | down | Rho GTPase activating protein 29                                                          |

Supplemental Table 1a  
eMSC vs. eEP

|         |                    |            |      |                                                                           |
|---------|--------------------|------------|------|---------------------------------------------------------------------------|
| 8165486 | TMEM203   LOC653   | -1.2537291 | down | transmembrane protein 203   hypothetical LOC653383                        |
| 8141206 | BAIAP2L1   LOC1001 | -1.2545604 | down | BAI1-associated protein 2-like 1   hypothetical protein LO                |
| 7928354 | FAM149B1           | -1.255299  | down | family with sequence similarity 149, member B1                            |
| 7909610 | ATF3               | -1.2562622 | down | activating transcription factor 3                                         |
| 8171516 | RBBP7              | -1.2568998 | down | retinoblastoma binding protein 7                                          |
| 7938951 | TMEM16E            | -1.2574637 | down | transmembrane protein 16E                                                 |
| 8106689 | CKMT2              | -1.2576809 | down | creatine kinase, mitochondrial 2 (sarcomeric)                             |
| 8129458 | ARHGAP18           | -1.2578067 | down | Rho GTPase activating protein 18                                          |
| 7974461 | LGALS3             | -1.2587019 | down | lectin, galactoside-binding, soluble, 3                                   |
| 8087985 | GLT8D1             | -1.2594014 | down | glycosyltransferase 8 domain containing 1                                 |
| 8171837 | KLHL15             | -1.2617614 | down | kelch-like 15 (Drosophila)                                                |
| 7973770 | SCFD1              | -1.265062  | down | sec1 family domain containing 1                                           |
| 7974587 | ACTR10             | -1.265811  | down | actin-related protein 10 homolog ( <i>S. cerevisiae</i> )                 |
| 8106702 | ZCCHC9             | -1.2661263 | down | zinc finger, CCHC domain containing 9                                     |
| 7961798 | SOX5               | -1.266294  | down | SRY (sex determining region Y)-box 5                                      |
| 8107814 | ISOC1              | -1.2665076 | down | isochorismatase domain containing 1                                       |
| 7952305 | LOC283155          | -1.267618  | down |                                                                           |
| 8047069 | INPP1              | -1.2689201 | down | inositol polyphosphate-1-phosphatase                                      |
| 8175432 | SNORD61            | -1.2691993 | down | small nucleolar RNA, C/D box 61                                           |
| 8081277 | NIT2               | -1.2692014 | down | nitrilase family, member 2                                                |
| 8105353 | SKIV2L2            | -1.2692889 | down | superkiller viralicidic activity 2-like 2 ( <i>S. cerevisiae</i> )        |
| 8129273 | C6orf170           | -1.2718209 | down | chromosome 6 open reading frame 170                                       |
| 7969228 | ALG11   UTP14C     | -1.2733392 | down | asparagine-linked glycosylation 11 homolog ( <i>S. cerevisiae</i> ,       |
| 8042270 | UGP2               | -1.2738283 | down | UDP-glucose pyrophosphorylase 2                                           |
| 7936567 | RAB11FIP2          | -1.2752262 | down | RAB11 family interacting protein 2 (class I)                              |
| 8097529 | ELMOD2             | -1.2758883 | down | ELMO/CED-12 domain containing 2                                           |
| 8002778 | MLKL               | -1.2762129 | down | mixed lineage kinase domain-like                                          |
| 8149825 | STC1               | -1.2768147 | down | stanniocalcin 1                                                           |
| 7904254 | ATP1A1             | -1.2792269 | down | ATPase, Na <sup>+</sup> /K <sup>+</sup> transporting, alpha 1 polypeptide |
| 7923119 | ZBTB41             | -1.2795517 | down | zinc finger and BTB domain containing 41                                  |
| 8132369 | EPDR1              | -1.2818351 | down | ependymin related protein 1 (zebrafish)                                   |
| 7925954 | NET1               | -1.2847489 | down | neuroepithelial cell transforming gene 1                                  |
| 7909332 | CD55               | -1.2883604 | down |                                                                           |

Supplemental Table 1a  
eMSC vs. eEP

|         |                 |            |      |                                                              |
|---------|-----------------|------------|------|--------------------------------------------------------------|
| 8020806 | RNF125          | -1.2884446 | down | ring finger protein 125                                      |
| 8046685 | UBE2E3 UBE2E4P  | -1.2911731 | down | ubiquitin-conjugating enzyme E2E 3 (UBC4/5 homolog, ye       |
| 8092905 | LSG1            | -1.2931345 | down | large subunit GTPase 1 homolog ( <i>S. cerevisiae</i> )      |
| 7989023 | RAB27A          | -1.2954972 | down |                                                              |
| 8114193 | SAR1B           | -1.2967756 | down | SAR1 gene homolog B ( <i>S. cerevisiae</i> )                 |
| 8121461 | CDC40           | -1.2970669 | down | cell division cycle 40 homolog ( <i>S. cerevisiae</i> )      |
| 8106556 | CMYA5           | -1.2971118 | down | cardiomyopathy associated 5                                  |
| 8127756 | LCA5            | -1.2978547 | down | Leber congenital amaurosis 5                                 |
| 8131539 | TMEM106B        | -1.3002381 | down | transmembrane protein 106B                                   |
| 7958620 | IFT81           | -1.3015317 | down | intraflagellar transport 81 homolog ( <i>Chlamydomonas</i> ) |
| 7902541 | IFI44L          | -1.3028382 | down | interferon-induced protein 44-like                           |
| 8066848 | PREX1           | -1.3028696 | down | phosphatidylinositol 3,4,5-trisphosphate-dependent RAC 1     |
| 7964810 | MDM1            | -1.303622  | down | Mdm1 nuclear protein homolog (mouse)                         |
| 8156905 | TMEFF1          | -1.3038124 | down | transmembrane protein with EGF-like and two follistatin-l    |
| 8068024 | JAM2            | -1.3055013 | down | junctional adhesion molecule 2                               |
| 8129363 | HDCC2           | -1.3060324 | down | HD domain containing 2                                       |
| 7969935 | ERCC5           | -1.3066361 | down | excision repair cross-complementing rodent repair deficie    |
| 8142697 | POT1            | -1.3072798 | down |                                                              |
| 8086555 | LZTFL1          | -1.3075504 | down | leucine zipper transcription factor-like 1                   |
| 8091778 | SCARNA7         | -1.3097407 | down | small Cajal body-specific RNA 7                              |
| 7983173 | CCNDBP1         | -1.3099308 | down | cyclin D-type binding-protein 1                              |
| 7942830 | LOC100130425 GC | -1.3133626 | down | hypothetical protein LOC100130425   GCRG-P224                |
| 8154692 | TEK             | -1.3134123 | down |                                                              |
| 8036341 | ZNF461          | -1.3144367 | down | zinc finger protein 461                                      |
| 8061035 | MACROD2         | -1.3151985 | down | MACRO domain containing 2                                    |
| 7995755 | OGFOD1          | -1.3173511 | down | 2-oxoglutarate and iron-dependent oxygenase domain co        |
| 8127841 | PGM3            | -1.3178887 | down | phosphoglucomutase 3                                         |
| 7907466 | DARS2           | -1.3181647 | down | aspartyl-tRNA synthetase 2, mitochondrial                    |
| 8117476 | BTN3A3          | -1.3185102 | down | butyrophilin, subfamily 3, member A3                         |
| 7919139 | LOC375010       | -1.3185152 | down |                                                              |
| 8129071 | FRK             | -1.3190879 | down | fyn-related kinase                                           |
| 7908988 | SNRPE           | -1.3195244 | down | small nuclear ribonucleoprotein polypeptide E                |
| 7932530 | PIP4K2A         | -1.3205106 | down | phosphatidylinositol-5-phosphate 4-kinase, type II, alpha    |

Supplemental Table 1a  
eMSC vs. eEP

|         |               |            |      |                                                                   |
|---------|---------------|------------|------|-------------------------------------------------------------------|
| 8103601 | DDX60L        | -1.3209469 | down | DEAD (Asp-Glu-Ala-Asp) box polypeptide 60-like                    |
| 8128837 | C6orf186 DDO  | -1.3239576 | down | chromosome 6 open reading frame 186   D-aspartate oxidase         |
| 8111101 | ANKH          | -1.3258337 | down | ankylosis, progressive homolog (mouse)                            |
| 7921987 | TMCO1         | -1.3272218 | down | transmembrane and coiled-coil domains 1                           |
| 8105633 | PPWD1         | -1.327579  | down | peptidylprolyl isomerase domain and WD repeat containing protein  |
| 7966321 | GPN3          | -1.328954  | down | GPN-loop GTPase 3                                                 |
| 8161701 | TMEM2         | -1.3328879 | down | transmembrane protein 2                                           |
| 8160284 | FAM29A        | -1.3339344 | down | family with sequence similarity 29, member A                      |
| 7984298 | DIS3L         | -1.3340898 | down | DIS3 mitotic control homolog ( <i>S. cerevisiae</i> )-like        |
| 8086451 | HIGD1A        | -1.3342491 | down | HIG1 domain family, member 1A                                     |
| 8115600 | LOC63920      | -1.3345921 | down | transposon-derived Buster3 transposase-like                       |
| 8043278 | MRPL35        | -1.3346764 | down | mitochondrial ribosomal protein L35                               |
| 8129974 | FUCA2         | -1.3350346 | down | fucosidase, alpha-L-2, plasma                                     |
| 8091446 | PFN2          | -1.3353914 | down | profilin 2                                                        |
| 8147396 | INTS8         | -1.3357229 | down | integrator complex subunit 8                                      |
| 8102464 | TRAM1L1       | -1.3381596 | down | translocation associated membrane protein 1-like 1                |
| 8121734 | ASF1A         | -1.3383777 | down | ASF1 anti-silencing function 1 homolog A ( <i>S. cerevisiae</i> ) |
| 8158671 | ASS1          | -1.3384975 | down | argininosuccinate synthetase 1                                    |
| 8051963 | SRBD1         | -1.3385649 | down | S1 RNA binding domain 1                                           |
| 7922598 | ANGPTL1       | -1.3392743 | down | angiopoietin-like 1                                               |
| 8107164 | HISPPD1       | -1.339578  | down | histidine acid phosphatase domain containing 1                    |
| 8002692 | ZFHX3         | -1.3405024 | down | zinc finger homeobox 3                                            |
| 8122348 | VTA1          | -1.3419082 | down | Vps20-associated 1 homolog ( <i>S. cerevisiae</i> )               |
| 8089867 | RABL3         | -1.3450894 | down | RAB, member of RAS oncogene family-like 3                         |
| 8000375 | ARHGAP17      | -1.3470281 | down | Rho GTPase activating protein 17                                  |
| 7919226 | POLR3C        | -1.3470713 | down | polymerase (RNA) III (DNA directed) polypeptide C (62kD)          |
| 7902553 | IFI44         | -1.347556  | down | interferon-induced protein 44                                     |
| 7962112 | CAPRIN2       | -1.3479297 | down | caprin family member 2                                            |
| 7984686 | BBS4          | -1.3513168 | down | Bardet-Biedl syndrome 4                                           |
| 8162039 | C9orf64       | -1.3523868 | down | chromosome 9 open reading frame 64                                |
| 8042223 | EHBP1         | -1.3527943 | down | EH domain binding protein 1                                       |
| 8138489 | CDCA7L        | -1.355367  | down | cell division cycle associated 7-like                             |
| 7983890 | Gcom1 GRINL1A | -1.3561852 | down | GRINL1A combined protein   glutamate receptor, ionotropic         |



Supplemental Table 1a  
eMSC vs. eEP

|         |               |            |      |                                                                        |
|---------|---------------|------------|------|------------------------------------------------------------------------|
| 7978666 | MBIP          | -1.3578956 | down | MAP3K12 binding inhibitory protein 1                                   |
| 8096224 | AFF1          | -1.3596942 | down | AF4/FMR2 family, member 1                                              |
| 8108475 | LOC492311     | -1.3620758 | down | similar to bovine IgA regulatory protein                               |
| 7901895 | ATG4C         | -1.3670208 | down | ATG4 autophagy related 4 homolog C ( <i>S. cerevisiae</i> )            |
| 8075310 | LIF           | -1.3680023 | down | leukemia inhibitory factor (cholinergic differentiation factor)        |
| 8137566 | RNF32         | -1.3691077 | down | ring finger protein 32                                                 |
| 8112302 | DKFZP686E2158 | -1.3694408 | down | hypothetical protein LOC643155                                         |
| 7992917 | CLUAP1        | -1.3705096 | down | clusterin associated protein 1                                         |
| 8022118 | EPB41L3       | -1.370762  | down | erythrocyte membrane protein band 4.1-like 3                           |
| 8090133 | CCDC14        | -1.3708227 | down | coiled-coil domain containing 14                                       |
| 7966448 | TMEM116       | -1.3711271 | down | transmembrane protein 116                                              |
| 7987772 | EHD4          | -1.3714747 | down | EH-domain containing 4                                                 |
| 8052762 | GFPT1         | -1.371963  | down | glutamine-fructose-6-phosphate transaminase 1                          |
| 8154491 | ADAMTSL1      | -1.3722565 | down | ADAMTS-like 1                                                          |
| 7961767 | KIAA0528      | -1.3733302 | down |                                                                        |
| 7962274 | KIF21A        | -1.3743861 | down | kinesin family member 21A                                              |
| 8023191 | SMAD2         | -1.375696  | down | SMAD family member 2                                                   |
| 7974725 | C14orf100     | -1.375927  | down | chromosome 14 open reading frame 100                                   |
| 8166098 | RAB9A         | -1.3762361 | down |                                                                        |
| 8107859 | LYRM7         | -1.3763521 | down | Lym7 homolog (mouse)                                                   |
| 7967863 | ZNF605        | -1.3771318 | down | zinc finger protein 605                                                |
| 7924476 | TAF1A         | -1.377675  | down | TATA box binding protein (TBP)-associated factor, RNA polymerase II, 2 |
| 7921344 | ELL2          | -1.3807797 | down | elongation factor, RNA polymerase II, 2                                |
| 8146462 | SOX17         | -1.3826641 | down | SRY (sex determining region Y)-box 17                                  |
| 7988859 | GNB5          | -1.382665  | down | guanine nucleotide binding protein (G protein), beta 5                 |
| 8117045 | RBM24         | -1.3847276 | down | RNA binding motif protein 24                                           |
| 8113073 | ARRDC3        | -1.3858271 | down | arrestin domain containing 3                                           |
| 7974214 | KLHDC1        | -1.3866223 | down | kelch domain containing 1                                              |
| 8171901 | MAP3K7IP3     | -1.3866282 | down | mitogen-activated protein kinase kinase kinase 7 interacting protein 3 |
| 7972297 | ABCC4         | -1.3877958 | down | ATP-binding cassette, sub-family C (CFTR/MRP), member 4                |
| 7980146 | NPC2          | -1.388765  | down | Niemann-Pick disease, type C2                                          |
| 8150908 | IMPAD1        | -1.3893621 | down | inositol monophosphatase domain containing 1                           |
| 8113220 | ELL2          | -1.3895227 | down | elongation factor, RNA polymerase II, 2                                |

Supplemental Table 1a  
eMSC vs. eEP

|         |                |            |      |                                                             |
|---------|----------------|------------|------|-------------------------------------------------------------|
| 8014115 | MYO1D          | -1.3897444 | down | myosin ID                                                   |
| 8081386 | NFKBIZ         | -1.3911669 | down | nuclear factor of kappa light polypeptide gene enhancer i   |
| 8103011 | OTUD4          | -1.3930774 | down | OTU domain containing 4                                     |
| 8027402 | CCNE1          | -1.3962305 | down | cyclin E1                                                   |
| 8139228 | C7orf25        | -1.3963447 | down | chromosome 7 open reading frame 25                          |
| 8047596 | ALS2CR16       | -1.397266  | down | amyotrophic lateral sclerosis 2 (juvenile) chromosome reg   |
| 7954481 | SSPN           | -1.397948  | down | sarcospan (Kras oncogene-associated gene)                   |
| 8044127 | C2orf49        | -1.4004248 | down | chromosome 2 open reading frame 49                          |
| 7918034 | DPH5           | -1.4011533 | down |                                                             |
| 7974125 | KIAA0423       | -1.4015329 | down |                                                             |
| 7976160 | TDP1           | -1.4024478 | down | tyrosyl-DNA phosphodiesterase 1                             |
| 7922104 | GCSH LOC730107 | -1.4038596 | down | glycine cleavage system protein H (aminomethyl carrier)     |
| 7918857 | TSPAN2         | -1.4044185 | down | tetraspanin 2                                               |
| 8151254 | NCOA2          | -1.4061308 | down | nuclear receptor coactivator 2                              |
| 8002999 | GCSH LOC730107 | -1.4067203 | down | glycine cleavage system protein H (aminomethyl carrier)     |
| 8107909 | SLC22A4        | -1.4085057 | down | solute carrier family 22 (organic cation/ergothioneine trar |
| 8116932 | PHACTR1        | -1.4096295 | down | phosphatase and actin regulator 1                           |
| 8052934 | MCEE           | -1.4103217 | down | methylmalonyl CoA epimerase                                 |
| 7938370 | SWAP70         | -1.4159012 | down | SWAP-70 protein                                             |
| 7954503 | MED21          | -1.4172621 | down | mediator complex subunit 21                                 |
| 7969576 | MIRHG1         | -1.4185796 | down | microRNA host gene (non-protein coding) 1                   |
| 8154178 | JAK2           | -1.4186318 | down | Janus kinase 2 (a protein tyrosine kinase)                  |
| 7909586 | PPP2R5A        | -1.4188911 | down | protein phosphatase 2, regulatory subunit B', alpha isofo   |
| 7925480 | FH             | -1.4205031 | down | fumarate hydratase                                          |
| 8018082 | SLC39A11       | -1.4223021 | down | solute carrier family 39 (metal ion transporter), member 1  |
| 7903803 | AHCYL1         | -1.4231822 | down | S-adenosylhomocysteine hydrolase-like 1                     |
| 8009255 | CCDC45         | -1.424579  | down | coiled-coil domain containing 45                            |
| 7909841 | MARK1          | -1.4270138 | down | MAP/microtubule affinity-regulating kinase 1                |
| 8039144 | TMC4           | -1.4286828 | down | transmembrane channel-like 4                                |
| 8074969 | DDT            | -1.429444  | down | D-dopachrome tautomerase                                    |
| 8044278 | CCDC138        | -1.431061  | down | coiled-coil domain containing 138                           |
| 8073799 | ATXN10         | -1.4311225 | down | ataxin 10                                                   |
| 8046628 | RBM45          | -1.4318275 | down | RNA binding motif protein 45                                |

Supplemental Table 1a  
eMSC vs. eEP

|         |                 |            |      |                                                                      |
|---------|-----------------|------------|------|----------------------------------------------------------------------|
| 7939298 | CAT             | -1.4368341 | down | catalase                                                             |
| 7903972 | ATP5F1          | -1.4371623 | down | ATP synthase, H <sup>+</sup> transporting, mitochondrial F0 complex, |
| 8144089 | LMBR1           | -1.4384778 | down | limb region 1 homolog (mouse)                                        |
| 8036324 | ZNF260          | -1.4389437 | down | zinc finger protein 260                                              |
| 7989315 | GTF2A2          | -1.4390198 | down | general transcription factor IIA, 2, 12kDa                           |
| 8167603 | CLCN5           | -1.441496  | down | chloride channel 5 (nephrolithiasis 2, X-linked, Dent disea          |
| 8142585 | CADPS2          | -1.4425759 | down | Ca <sup>2+</sup> -dependent activator protein for secretion 2        |
| 7911155 | SCCPDH          | -1.4428976 | down | saccharopine dehydrogenase (putative)                                |
| 8105741 | MAST4 LOC100128 | -1.4435835 | down | microtubule associated serine/threonine kinase family me             |
| 8122756 | PLEKHG1         | -1.4446923 | down | pleckstrin homology domain containing, family G (with Rh             |
| 8091737 | IFT80           | -1.4452908 | down | intraflagellar transport 80 homolog (Chlamydomonas)                  |
| 7904693 | FLJ21272        | -1.4468074 | down |                                                                      |
| 7972487 | DOCK9           | -1.4469134 | down | dedicator of cytokinesis 9                                           |
| 7974166 | FANCM           | -1.4475721 | down | Fanconi anemia, complementation group M                              |
| 7964347 | TMEM194         | -1.4476789 | down | transmembrane protein 194                                            |
| 8092009 | LRRC34          | -1.4489276 | down | leucine rich repeat containing 34                                    |
| 8023165 | HDHD2           | -1.4505451 | down | haloacid dehalogenase-like hydrolase domain containing :             |
| 8064967 | MKKS            | -1.4508684 | down | McKusick-Kaufman syndrome                                            |
| 8054281 | LONRF2          | -1.4556528 | down | LON peptidase N-terminal domain and ring finger 2                    |
| 8114778 | GCSH LOC730107  | -1.4586083 | down | glycine cleavage system protein H (aminomethyl carrier)              |
| 7939329 | PDHX            | -1.4600253 | down | pyruvate dehydrogenase complex, component X                          |
| 8078933 | MYRIP           | -1.4620398 | down | myosin VIIA and Rab interacting protein                              |
| 8122672 | MAP3K7IP2       | -1.4636493 | down | mitogen-activated protein kinase kinase kinase 7 interacti           |
| 7990700 | WDR61           | -1.4641552 | down | WD repeat domain 61                                                  |
| 7983191 | ADAL            | -1.4650124 | down | adenosine deaminase-like                                             |
| 7914550 | ZBTB8OS         | -1.4654039 | down | zinc finger and BTB domain containing 8 opposite strand              |
| 8001876 | NAE1            | -1.4661947 | down | NEDD8 activating enzyme E1 subunit 1                                 |
| 8016476 | HOXB9           | -1.4676336 | down | homeobox B9                                                          |
| 8155883 | OSTF1           | -1.46826   | down | osteoclast stimulating factor 1                                      |
| 7909561 | C1orf97         | -1.4690036 | down | chromosome 1 open reading frame 97                                   |
| 7911989 | RPL22           | -1.4698169 | down | ribosomal protein L22                                                |
| 7974851 | HIF1A           | -1.4698815 | down | hypoxia-inducible factor 1, alpha subunit (basic helix-loop          |
| 8108099 | SEC24A          | -1.4705848 | down | SEC24 related gene family, member A (S. cerevisiae)                  |

Supplemental Table 1a  
eMSC vs. eEP

|         |               |            |      |                                                           |
|---------|---------------|------------|------|-----------------------------------------------------------|
| 8090277 | OSBPL11       | -1.4718635 | down | oxysterol binding protein-like 11                         |
| 8051928 | PREPL         | -1.4723917 | down | prolyl endopeptidase-like                                 |
| 8013906 | TWF1          | -1.4749534 | down | twinfilin, actin-binding protein, homolog 1 (Drosophila)  |
| 7922268 | KIFAP3        | -1.4751164 | down | kinesin-associated protein 3                              |
| 7987454 | BMF           | -1.4756079 | down | Bcl2 modifying factor                                     |
| 8120239 | TMEM14A       | -1.476326  | down | transmembrane protein 14A                                 |
| 8129379 | ECHDC1        | -1.4766415 | down | enoyl Coenzyme A hydratase domain containing 1            |
| 7926596 | COMMD3        | -1.4776882 | down | COMM domain containing 3                                  |
| 8121002 | C6orf162      | -1.4781631 | down | chromosome 6 open reading frame 162                       |
| 7938890 | PRMT3         | -1.4794463 | down | protein arginine methyltransferase 3                      |
| 7962183 | AK3L1 AK3L2   | -1.4809706 | down | adenylate kinase 3-like 1   adenylate kinase 3-like 2     |
| 8120552 | FAM135A       | -1.4821521 | down | family with sequence similarity 135, member A             |
| 8175755 | CETN2         | -1.4840578 | down | centrin, EF-hand protein, 2                               |
| 7996081 | GPR56         | -1.4844601 | down | G protein-coupled receptor 56                             |
| 8101086 | NAAA          | -1.4854661 | down | N-acylethanolamine acid amidase                           |
| 8096753 | HADH          | -1.4883931 | down | hydroxyacyl-Coenzyme A dehydrogenase                      |
| 7970624 | CENPJ         | -1.4899201 | down | centromere protein J                                      |
| 8083282 | HPS3          | -1.4909155 | down | Hermansky-Pudlak syndrome 3                               |
| 8090678 | MRPL3         | -1.4909741 | down | mitochondrial ribosomal protein L3                        |
| 8167897 | RRAGB         | -1.4912609 | down | Ras-related GTP binding B                                 |
| 8147079 | LRRCC1        | -1.4915656 | down | leucine rich repeat and coiled-coil domain containing 1   |
| 8142143 | COG5          | -1.4934503 | down | component of oligomeric golgi complex 5                   |
| 7968800 | DGKH          | -1.494282  | down | diacylglycerol kinase, eta                                |
| 8089993 | WDR5B         | -1.4946134 | down | WD repeat domain 5B                                       |
| 7930882 | FAM45A FAM45B | -1.4952828 | down | family with sequence similarity 45, member A   family wit |
| 8099612 | GPR125        | -1.4976578 | down | G protein-coupled receptor 125                            |
| 8157144 | C9orf6        | -1.4982285 | down | chromosome 9 open reading frame 6                         |
| 7970162 | ATP11A        | -1.4984995 | down | ATPase, class VI, type 11A                                |
| 8042066 | CCDC104       | -1.5006877 | down | coiled-coil domain containing 104                         |
| 8124166 | MBOAT1        | -1.5007976 | down | membrane bound O-acyltransferase domain containing 1      |
| 8083616 | MLF1          | -1.5043609 | down | myeloid leukemia factor 1                                 |
| 8080562 | IL17RB        | -1.5054121 | down | interleukin 17 receptor B                                 |
| 8047356 | NIF3L1        | -1.5069389 | down | NIF3 NGG1 interacting factor 3-like 1 (S. pombe)          |

Supplemental Table 1a  
eMSC vs. eEP

|         |           |            |      |                                                                          |
|---------|-----------|------------|------|--------------------------------------------------------------------------|
| 8157058 | FSD1L     | -1.5070359 | down | fibronectin type III and SPRY domain containing 1-like                   |
| 8044417 | TMEM87B   | -1.5073688 | down | transmembrane protein 87B                                                |
| 8077513 | THUMPD3   | -1.5078511 | down | THUMP domain containing 3                                                |
| 8173933 | PCDH19    | -1.5080086 | down | protocadherin 19                                                         |
| 8083901 | FNDC3B    | -1.5085324 | down | fibronectin type III domain containing 3B                                |
| 8054092 | TMEM131   | -1.5095174 | down | transmembrane protein 131                                                |
| 7983638 | DTWD1     | -1.5096835 | down | DTW domain containing 1                                                  |
| 7994237 | LCMT1     | -1.5103016 | down | leucine carboxyl methyltransferase 1                                     |
| 8083136 | ATP1B3    | -1.5117466 | down | ATPase, Na <sup>+</sup> /K <sup>+</sup> transporting, beta 3 polypeptide |
| 8010139 | SEC14L1   | -1.5124122 | down | SEC14-like 1 ( <i>S. cerevisiae</i> )                                    |
| 8070458 | PLAC4     | -1.5138899 | down | placenta-specific 4                                                      |
| 8175177 | MBNL3     | -1.5152102 | down | muscleblind-like 3 ( <i>Drosophila</i> )                                 |
| 8147375 | DPY19L4   | -1.5208033 | down | dpy-19-like 4 ( <i>C. elegans</i> )                                      |
| 7965022 | KRR1      | -1.5208656 | down |                                                                          |
| 7948656 | FTH1      | -1.5278897 | down | ferritin, heavy polypeptide 1                                            |
| 7955063 | TMEM106C  | -1.5299432 | down | transmembrane protein 106C                                               |
| 8138912 | LSM5      | -1.5300612 | down |                                                                          |
| 7901336 | ALS2CR2   | -1.5306246 | down | amyotrophic lateral sclerosis 2 (juvenile) chromosome reg                |
| 7985268 | FAH       | -1.5328639 | down | fumarylacetoacetate hydrolase (fumarylacetoacetase)                      |
| 8146544 | LOC137886 | -1.5348014 | down |                                                                          |
| 8126860 | MUT       | -1.5352131 | down | methylmalonyl Coenzyme A mutase                                          |
| 8042503 | MXD1      | -1.5358657 | down | MAX dimerization protein 1                                               |
| 7990879 | EFTUD1    | -1.536972  | down | elongation factor Tu GTP binding domain containing 1                     |
| 8154135 | SLC1A1    | -1.5380774 | down | solute carrier family 1 (neuronal/epithelial high affinity glu           |
| 8168873 | LOC653354 | -1.5396796 | down |                                                                          |
| 8121895 | TRMT11    | -1.5413247 | down | tRNA methyltransferase 11 homolog ( <i>S. cerevisiae</i> )               |
| 7943387 | C11orf70  | -1.5427047 | down | chromosome 11 open reading frame 70                                      |
| 7948900 | SNORD30   | -1.5430652 | down | small nucleolar RNA, C/D box 30                                          |
| 8152764 | MTSS1     | -1.5435582 | down | metastasis suppressor 1                                                  |
| 8163063 | CTNNAL1   | -1.5442554 | down | catenin (cadherin-associated protein), alpha-like 1                      |
| 8059801 | USP40     | -1.5487918 | down | ubiquitin specific peptidase 40                                          |
| 8054135 | MGAT4A    | -1.5509247 | down | mannosyl (alpha-1,3-)-glycoprotein beta-1,4-N-acetylglu                  |
| 8117382 | HIST1H2BD | -1.5512514 | down | histone cluster 1, H2bd                                                  |

Supplemental Table 1a  
eMSC vs. eEP

|         |           |            |      |                                                              |
|---------|-----------|------------|------|--------------------------------------------------------------|
| 8168855 | ARMCX4    | -1.5520729 | down | armadillo repeat containing, X-linked 4                      |
| 7977933 | SLC7A8    | -1.5528482 | down | solute carrier family 7 (cationic amino acid transporter, y+ |
| 8047443 | ALS2CR2   | -1.5535972 | down | amyotrophic lateral sclerosis 2 (juvenile) chromosome reg    |
| 8091715 | LXN       | -1.5544732 | down | latexin                                                      |
| 7926821 | MASTL     | -1.5546927 | down | microtubule associated serine/threonine kinase-like          |
| 8105077 | CARD6     | -1.5548233 | down | caspase recruitment domain family, member 6                  |
| 8041676 | DYNC2L1   | -1.5549374 | down | dynein, cytoplasmic 2, light intermediate chain 1            |
| 8121850 | HEY2      | -1.5556004 | down | hairy/enhancer-of-split related with YRPW motif 2            |
| 7943376 | KIAA1377  | -1.5569931 | down |                                                              |
| 8165642 | TMEM203   | -1.5586116 | down | transmembrane protein 203                                    |
| 7928471 | ADK       | -1.5597891 | down | adenosine kinase                                             |
| 8120943 | CYB5R4    | -1.560813  | down | cytochrome b5 reductase 4                                    |
| 8040655 | SELI      | -1.5608494 | down | selenoprotein I                                              |
| 8138941 | NT5C3     | -1.5614762 | down | 5'-nucleotidase, cytosolic III                               |
| 8062211 | BXDC1     | -1.5626175 | down | brix domain containing 1                                     |
| 7922162 | SLC19A2   | -1.5634266 | down | solute carrier family 19 (thiamine transporter), member 2    |
| 7914603 | RNF19B    | -1.5670288 | down | ring finger protein 19B                                      |
| 8022393 | PTPN2     | -1.567887  | down | protein tyrosine phosphatase, non-receptor type 2            |
| 8169617 | PGRMC1    | -1.5683683 | down | progesterone receptor membrane component 1                   |
| 8049512 | LRRFIP1   | -1.569298  | down | leucine rich repeat (in FLII) interacting protein 1          |
| 7980773 | CCDC88C   | -1.5709348 | down | coiled-coil domain containing 88C                            |
| 7897522 | RBP7      | -1.5718249 | down | retinol binding protein 7, cellular                          |
| 8081343 | RG9MTD1   | -1.5737323 | down | RNA (guanine-9-) methyltransferase domain containing 1       |
| 8132399 | C7orf36   | -1.5748241 | down | chromosome 7 open reading frame 36                           |
| 7920291 | S100A16   | -1.5751691 | down | S100 calcium binding protein A16                             |
| 8046099 | NOSTRIN   | -1.577147  | down | nitric oxide synthase trafficker                             |
| 8173825 | RPS6KA6   | -1.5782294 | down | ribosomal protein S6 kinase, 90kDa, polypeptide 6            |
| 8099897 | UGDH      | -1.5793176 | down | UDP-glucose dehydrogenase                                    |
| 8090433 | MGLL      | -1.5796832 | down | monoglyceride lipase                                         |
| 8091327 | PLSCR1    | -1.5805731 | down | phospholipid scramblase 1                                    |
| 8044008 | IL1RL2    | -1.5829027 | down | interleukin 1 receptor-like 2                                |
| 8093191 | DLG1      | -1.5830042 | down | discs, large homolog 1 (Drosophila)                          |
| 8060940 | C20orf103 | -1.5830816 | down | chromosome 20 open reading frame 103                         |

Supplemental Table 1a  
eMSC vs. eEP

|         |                  |            |      |                                                                 |
|---------|------------------|------------|------|-----------------------------------------------------------------|
| 7968711 | COG6             | -1.5836173 | down | component of oligomeric golgi complex 6                         |
| 7975971 | C14orf174        | -1.5845109 | down | chromosome 14 open reading frame 174                            |
| 8161774 | TRPM6            | -1.5858049 | down | transient receptor potential cation channel, subfamily M,       |
| 7948987 | HRASLS3          | -1.5875801 | down | HRAS-like suppressor 3                                          |
| 8113097 | KIAA0825         | -1.5892498 | down |                                                                 |
| 8123044 | TULP4            | -1.5894037 | down | tubby like protein 4                                            |
| 8075182 | XBP1             | -1.5896189 | down | X-box binding protein 1                                         |
| 8114300 | KLHL3            | -1.5906851 | down | kelch-like 3 (Drosophila)                                       |
| 8121578 | NT5DC1           | -1.5921782 | down | 5'-nucleotidase domain containing 1                             |
| 8027354 | LOC388524        | -1.5953957 | down | ribosomal protein SA pseudogene                                 |
| 8022338 | DISP2 LOC728211  | -1.596162  | down | dispatched homolog 2 (Drosophila)   hypothetical LOC728         |
| 8152222 | AZIN1            | -1.597482  | down | antizyme inhibitor 1                                            |
| 8064868 | RP5-1022P6.2     | -1.5977604 | down | hypothetical protein KIAA1434                                   |
| 7961386 | GPRC5D           | -1.6008775 | down | G protein-coupled receptor, family C, group 5, member D         |
| 8146000 | ADAM9            | -1.6009736 | down | ADAM metallopeptidase domain 9 (meltrin gamma)                  |
| 7902957 | ABHD7            | -1.602258  | down | abhydrolase domain containing 7                                 |
| 7936408 | DCLRE1A          | -1.6025038 | down | DNA cross-link repair 1A (PSO2 homolog, <i>S. cerevisiae</i> )  |
| 8096411 | TIGD2            | -1.6037327 | down | tigger transposable element derived 2                           |
| 7910030 | C1orf67 DNAH14 F | -1.6074111 | down | chromosome 1 open reading frame 67   dynein, axonema            |
| 7902345 | TYW3             | -1.6118524 | down | tRNA-yW synthesizing protein 3 homolog ( <i>S. cerevisiae</i> ) |
| 8117081 | AOF1             | -1.6127933 | down | amine oxidase (flavin containing) domain 1                      |
| 7974229 | KLHDC2           | -1.6134654 | down | kelch domain containing 2                                       |
| 8103822 | VEGFC            | -1.6144567 | down | vascular endothelial growth factor C                            |
| 8095139 | SRD5A3           | -1.6146643 | down | steroid 5 alpha-reductase 3                                     |
| 8068671 | BACE2            | -1.6165712 | down | beta-site APP-cleaving enzyme 2                                 |
| 8083000 | FAIM             | -1.6167853 | down | Fas apoptotic inhibitory molecule                               |
| 8135235 | PMPCB            | -1.6175681 | down | peptidase (mitochondrial processing) beta                       |
| 8140915 | PEX1             | -1.6180142 | down | peroxisome biogenesis factor 1                                  |
| 7902367 | ACADM            | -1.6187764 | down | acyl-Coenzyme A dehydrogenase, C-4 to C-12 straight cha         |
| 7923141 | DENND1B C1orf21  | -1.6190917 | down | DENN/MADD domain containing 1B   chromosome 1 ope               |
| 8141872 | NAPEPLD          | -1.6216376 | down | N-acyl phosphatidylethanolamine phospholipase D                 |
| 8066074 | DSN1             | -1.6231328 | down |                                                                 |
| 8157233 | HSDL2            | -1.6259452 | down | hydroxysteroid dehydrogenase like 2                             |

Supplemental Table 1a  
eMSC vs. eEP

|         |                           |            |      |                                                                          |
|---------|---------------------------|------------|------|--------------------------------------------------------------------------|
| 8149733 | TNFRSF10B                 | -1.6264291 | down | tumor necrosis factor receptor superfamily, member 10b                   |
| 8155563 | LOC100132139 LOC100132139 | -1.6272979 | down | similar to methylenetetrahydrofolate dehydrogenase (NADPH-dependent)     |
| 7917896 | ALG14                     | -1.627834  | down | asparagine-linked glycosylation 14 homolog (S. cerevisiae)               |
| 8027268 | ZNF66                     | -1.6304593 | down | zinc finger protein 66                                                   |
| 8071981 | CTA-221G9.4               | -1.630956  | down | KIAA1671 protein                                                         |
| 7928046 | TSPAN15                   | -1.6323874 | down | tetraspanin 15                                                           |
| 7946288 | ZNF214                    | -1.6329081 | down | zinc finger protein 214                                                  |
| 8116867 | TMEM14B                   | -1.6331478 | down | transmembrane protein 14B                                                |
| 8001423 | RPGRIP1L                  | -1.6337868 | down | RPGRIP1-like                                                             |
| 8041967 | C2orf30                   | -1.6354345 | down | chromosome 2 open reading frame 30                                       |
| 8004133 | RPAIN                     | -1.6355857 | down | RPA interacting protein                                                  |
| 8166442 | FAM3C                     | -1.6362963 | down | family with sequence similarity 3, member C                              |
| 7915926 | STIL                      | -1.6377181 | down | SCL/TAL1 interrupting locus                                              |
| 7909285 | PFKFB2                    | -1.6392354 | down | 6-phosphofructo-2-kinase/fructose-2,6-biphosphatase 2                    |
| 7917875 | F3                        | -1.6397603 | down | coagulation factor III (thromboplastin, tissue factor)                   |
| 7979196 | GNPNAT1                   | -1.6399581 | down | glucosamine-phosphate N-acetyltransferase 1                              |
| 8142540 | FAM3C                     | -1.6402923 | down | family with sequence similarity 3, member C                              |
| 8166219 | SYAP1                     | -1.6404054 | down | synapse associated protein 1, SAP47 homolog (Drosophila)                 |
| 8055445 | DARS                      | -1.6405139 | down | aspartyl-tRNA synthetase                                                 |
| 8171024 | LOC401622                 | -1.6407721 | down | similar to LINE-1 reverse transcriptase homolog                          |
| 8149248 | LRLE1 LOC1001278          | -1.6417075 | down | liver-related low express protein 1   similar to liver-related protein 1 |
| 7924309 | ESRRG                     | -1.6434529 | down | estrogen-related receptor gamma                                          |
| 8081503 | DZIP3                     | -1.6441531 | down | DAZ interacting protein 3, zinc finger                                   |
| 8010243 | SYNGR2                    | -1.6445947 | down | synaptogyrin 2                                                           |
| 8111286 | RNASEN                    | -1.6451744 | down | ribonuclease type III, nuclear                                           |
| 7987642 | NDUFAF1                   | -1.6457435 | down | NADH dehydrogenase (ubiquinone) 1 alpha subcomplex, assembly factor 1    |
| 8161484 | LOC100132139 LOC100132139 | -1.6469268 | down | similar to methylenetetrahydrofolate dehydrogenase (NADPH-dependent)     |
| 8140170 | GTF2IRD2 GTF2IRD2         | -1.6476035 | down | GTF2I repeat domain containing 2   GTF2I repeat domain                   |
| 8058927 | TMBIM1                    | -1.6478248 | down | transmembrane BAX inhibitor motif containing 1                           |
| 8147313 | TMEM67                    | -1.6480367 | down | transmembrane protein 67                                                 |
| 8078319 | ZCWPW2                    | -1.6484993 | down | zinc finger, CW type with PWWP domain 2                                  |
| 7956989 | MDM2                      | -1.6500368 | down | Mdm2 p53 binding protein homolog (mouse)                                 |
| 8140971 | SAMD9L                    | -1.6513201 | down | sterile alpha motif domain containing 9-like                             |



Supplemental Table 1a  
eMSC vs. eEP

|         |                  |            |      |                                                                                       |
|---------|------------------|------------|------|---------------------------------------------------------------------------------------|
| 7945873 | ZNF195           | -1.6521081 | down | zinc finger protein 195                                                               |
| 8138789 | JAZF1            | -1.6538566 | down | JAZF zinc finger 1                                                                    |
| 8119000 | MAPK14           | -1.6563836 | down | mitogen-activated protein kinase 14                                                   |
| 7986359 | IGF1R            | -1.6577399 | down | insulin-like growth factor 1 receptor                                                 |
| 7980580 | GALC             | -1.6583539 | down | galactosylceramidase                                                                  |
| 8046833 | FLJ44048         | -1.6651497 | down |                                                                                       |
| 8133549 | GTF2IRD2 GTF2IRD | -1.6652004 | down | GTF2I repeat domain containing 2   GTF2I repeat domain                                |
| 8081903 | C3orf15          | -1.6684846 | down | chromosome 3 open reading frame 15                                                    |
| 8094226 | LOC285550        | -1.6693025 | down |                                                                                       |
| 8097388 | LARP2            | -1.669425  | down | La ribonucleoprotein domain family, member 2                                          |
| 8142468 | TPM3             | -1.6710186 | down | tropomyosin 3                                                                         |
| 7929288 | EXOC6            | -1.6711259 | down | exocyst complex component 6                                                           |
| 8121489 | AMD1             | -1.6715388 | down | adenosylmethionine decarboxylase 1                                                    |
| 8041745 | C2orf34          | -1.6721036 | down | chromosome 2 open reading frame 34                                                    |
| 7965335 | DUSP6            | -1.6738247 | down | dual specificity phosphatase 6                                                        |
| 8150962 | TOX              | -1.6750001 | down | thymocyte selection-associated high mobility group box                                |
| 8140500 | TMEM60           | -1.6757617 | down | transmembrane protein 60                                                              |
| 8081219 | ST3GAL6          | -1.6761692 | down | ST3 beta-galactoside alpha-2,3-sialyltransferase 6                                    |
| 8098084 | ETFDH            | -1.6771572 | down | electron-transferring-flavoprotein dehydrogenase                                      |
| 8122818 | C6orf211         | -1.6796938 | down | chromosome 6 open reading frame 211                                                   |
| 7988286 | SPG11            | -1.6820352 | down | spastic paraplegia 11 (autosomal recessive)                                           |
| 7987361 | ZNF770           | -1.6824383 | down | zinc finger protein 770                                                               |
| 7943231 | ANKRD49          | -1.6829104 | down | ankyrin repeat domain 49                                                              |
| 8141024 | BET1             | -1.6833831 | down | blocked early in transport 1 homolog ( <i>S. cerevisiae</i> )                         |
| 8051707 | MAP4K3           | -1.6846651 | down | mitogen-activated protein kinase kinase kinase 3                                      |
| 8041179 | CLIP4            | -1.6891083 | down | CAP-GLY domain containing linker protein family, member                               |
| 7918008 | DBT              | -1.6900685 | down | dihydro-lipoamide branched chain transacylase E2                                      |
| 8042574 | OR7E37P LOC4414  | -1.690918  | down | olfactory receptor, family 7, subfamily E, member 37 pseudogene                       |
| 8085033 | LMLN             | -1.6914914 | down | leishmanolysin-like (metallopeptidase M8 family)                                      |
| 8136516 | tcag7.1228       | -1.691564  | down | hypothetical protein FLJ25778                                                         |
| 8143279 | ZC3HAV1          | -1.6931958 | down | zinc finger CCCH-type, antiviral 1                                                    |
| 7928534 | C10orf11         | -1.6940762 | down | chromosome 10 open reading frame 11                                                   |
| 8155487 | KGFLP1 KGFLP2 FC | -1.6949714 | down | keratinocyte growth factor-like protein 1   keratinocyte growth factor-like protein 2 |

Supplemental Table 1a  
eMSC vs. eEP

|         |                  |            |      |                                                               |
|---------|------------------|------------|------|---------------------------------------------------------------|
| 8093053 | TFRC             | -1.6950567 | down | transferrin receptor (p90, CD71)                              |
| 8121510 | BXDC1            | -1.6957577 | down | brix domain containing 1                                      |
| 7940191 | STX3             | -1.6960616 | down | syntaxin 3                                                    |
| 7944803 | LOH11CR2A        | -1.6961296 | down | loss of heterozygosity, 11, chromosomal region 2, gene A      |
| 8174076 | GLA              | -1.6965504 | down | galactosidase, alpha                                          |
| 7925500 | CHML             | -1.698053  | down | choroideremia-like (Rab escort protein 2)                     |
| 8161455 | KGFLP2 KGFLP1 FC | -1.6991593 | down | keratinocyte growth factor-like protein 2   keratinocyte g    |
| 8068593 | ETS2             | -1.6995907 | down | v-ets erythroblastosis virus E26 oncogene homolog 2 (avia     |
| 8155630 | LOC100132139 LO  | -1.7005061 | down | similar to methylenetetrahydrofolate dehydrogenase (NA        |
| 8161423 | KGFLP2 KGFLP1 FC | -1.7013551 | down | keratinocyte growth factor-like protein 2   keratinocyte g    |
| 7983111 | SNAP23           | -1.7031573 | down | synaptosomal-associated protein, 23kDa                        |
| 8144699 | LRLE1 LOC1001278 | -1.703201  | down | liver-related low express protein 1   similar to liver-relate |
| 8161377 | LOC100132139 LO  | -1.705734  | down | similar to methylenetetrahydrofolate dehydrogenase (NA        |
| 8122933 | TIAM2            | -1.705912  | down | T-cell lymphoma invasion and metastasis 2                     |
| 7911038 | ZNF238           | -1.7077118 | down | zinc finger protein 238                                       |
| 8039692 | LOC730051        | -1.7077358 | down | similar to hCG2044798                                         |
| 8155707 | TJP2             | -1.7091576 | down | tight junction protein 2 (zona occludens 2)                   |
| 8107632 | SNX24            | -1.7098348 | down | sorting nexin 24                                              |
| 8095760 | THAP6            | -1.7107135 | down | THAP domain containing 6                                      |
| 8156043 | PSAT1            | -1.7110233 | down | phosphoserine aminotransferase 1                              |
| 8120165 | CENPQ            | -1.7133045 | down | centromere protein Q                                          |
| 7954717 | BICD1            | -1.7136468 | down | bicaudal D homolog 1 (Drosophila)                             |
| 7922408 | SNORD78          | -1.7146802 | down | small nucleolar RNA, C/D box 78                               |
| 8094169 | CPEB2            | -1.7166612 | down | cytoplasmic polyadenylation element binding protein 2         |
| 7915775 | IPP              | -1.716806  | down | intracisternal A particle-promoted polypeptide                |
| 7904830 | ZNF364           | -1.7200435 | down | zinc finger protein 364                                       |
| 7962013 | ERGIC2           | -1.7239302 | down | ERGIC and golgi 2                                             |
| 8143988 | MLL3             | -1.7240986 | down | myeloid/lymphoid or mixed-lineage leukemia 3                  |
| 8028194 | ZNF382           | -1.7241402 | down | zinc finger protein 382                                       |
| 8030950 | ZNF701           | -1.7249916 | down | zinc finger protein 701                                       |
| 7962884 | RND1             | -1.7252101 | down | Rho family GTPase 1                                           |
| 8020930 | ELP2             | -1.7256753 | down | elongation protein 2 homolog (S. cerevisiae)                  |
| 8132376 | STARD3NL         | -1.7261627 | down | STARD3 N-terminal like                                        |

Supplemental Table 1a  
eMSC vs. eEP

|         |                 |            |      |                                                                   |
|---------|-----------------|------------|------|-------------------------------------------------------------------|
| 7917482 | CCBL2           | -1.7280462 | down | cysteine conjugate-beta lyase 2                                   |
| 8110971 | CMBL            | -1.7284634 | down | carboxymethylenebutenolidase homolog (Pseudomonas)                |
| 7928671 | C10orf57        | -1.7291976 | down | chromosome 10 open reading frame 57                               |
| 8111339 | MTMR12          | -1.730932  | down | myotubularin related protein 12                                   |
| 7968787 | OR7E37P OR7E47P | -1.7334876 | down | olfactory receptor, family 7, subfamily E, member 37 pseudogene   |
| 8145835 | ERLIN2          | -1.7357312 | down | ER lipid raft associated 2                                        |
| 8142663 | NDUFA5          | -1.7359114 | down | NADH dehydrogenase (ubiquinone) 1 alpha subcomplex, mitochondrial |
| 8014100 | C17orf75        | -1.7380934 | down | chromosome 17 open reading frame 75                               |
| 7979158 | TXNDC16         | -1.7388202 | down | thioredoxin domain containing 16                                  |
| 8123038 | GTF2H5          | -1.739286  | down | general transcription factor IIH, polypeptide 5                   |
| 8082607 | ATP2C1          | -1.7399735 | down | ATPase, Ca <sup>++</sup> transporting, type 2C, member 1          |
| 7948113 | OR7E5P          | -1.740497  | down | olfactory receptor, family 7, subfamily E, member 5 pseudogene    |
| 8094936 | LOC280665       | -1.7436291 | down | putative anti-CNG alpha 1 cation channel translation product      |
| 8038998 | ZNF468          | -1.7439225 | down | zinc finger protein 468                                           |
| 8159984 | C9orf46         | -1.744415  | down | chromosome 9 open reading frame 46                                |
| 8129901 | REPS1           | -1.7447518 | down | RALBP1 associated Eps domain containing 1                         |
| 7971241 | OR7E37P OR7E47P | -1.7453598 | down | olfactory receptor, family 7, subfamily E, member 37 pseudogene   |
| 8007493 | ARL4D           | -1.7469335 | down | ADP-ribosylation factor-like 4D                                   |
| 8118142 | TNF             | -1.7469841 | down |                                                                   |
| 8177983 | TNF             | -1.7473786 | down |                                                                   |
| 7989968 | CALML4          | -1.7479737 | down | calmodulin-like 4                                                 |
| 7954613 | CCDC91          | -1.749439  | down | coiled-coil domain containing 91                                  |
| 8179263 | TNF             | -1.7494617 | down |                                                                   |
| 8148049 | NOV             | -1.7495326 | down | nephroblastoma overexpressed gene                                 |
| 8083941 | ECT2            | -1.7496902 | down | epithelial cell transforming sequence 2 oncogene                  |
| 8057933 | GTF3C3          | -1.7498211 | down | general transcription factor IIIC, polypeptide 3, 102kDa          |
| 7984843 | ARID3B          | -1.7500128 | down | AT rich interactive domain 3B (BRIGHT-like)                       |
| 8094342 | C4orf28         | -1.7504267 | down | chromosome 4 open reading frame 28                                |
| 8151436 | PXMP3           | -1.7516198 | down | peroxisomal membrane protein 3, 35kDa (Zellweger syndrome)        |
| 7982256 | GOLGA9P         | -1.7517991 | down | golgi autoantigen, golgin subfamily a, 9 pseudogene               |
| 8082066 | C3orf28         | -1.7519397 | down | chromosome 3 open reading frame 28                                |
| 7910600 | KIAA1804        | -1.7521856 | down | mixed lineage kinase 4                                            |
| 8127787 | IBTK            | -1.7530736 | down | inhibitor of Bruton agammaglobulinemia tyrosine kinase            |

Supplemental Table 1a  
eMSC vs. eEP

|         |           |            |      |                                                              |
|---------|-----------|------------|------|--------------------------------------------------------------|
| 7987405 | RASGRP1   | -1.7544268 | down | RAS guanyl releasing protein 1 (calcium and DAG-regulate     |
| 8045887 | OR7E37P   | -1.7562159 | down | olfactory receptor, family 7, subfamily E, member 37 pseu    |
| 8129888 | NHSL1     | -1.7571294 | down | NHS-like 1                                                   |
| 8045499 | HNMT      | -1.7573835 | down | histamine N-methyltransferase                                |
| 7976443 | IFI27     | -1.7575939 | down | interferon, alpha-inducible protein 27                       |
| 8156319 | GADD45G   | -1.7580396 | down | growth arrest and DNA-damage-inducible, gamma                |
| 8159850 | FLJ35024  | -1.7596585 | down | hypothetical LOC401491                                       |
| 8038993 | ZNF28     | -1.7604997 | down | zinc finger protein 28                                       |
| 8103399 | PDGFC     | -1.7620579 | down | platelet derived growth factor C                             |
| 8044700 | DPP10     | -1.762064  | down | dipeptidyl-peptidase 10                                      |
| 7927915 | STOX1     | -1.7621182 | down | storkhead box 1                                              |
| 7986383 | IGF1R     | -1.7622306 | down | insulin-like growth factor 1 receptor                        |
| 8082673 | ACPP      | -1.7632068 | down | acid phosphatase, prostate                                   |
| 7980742 | LOC283588 | -1.7637546 | down |                                                              |
| 8130102 | KATNA1    | -1.7650516 | down | katanin p60 (ATPase-containing) subunit A 1                  |
| 7972269 | TGDS      | -1.7652947 | down | TDP-glucose 4,6-dehydratase                                  |
| 8143433 | MRPS33    | -1.7703512 | down | mitochondrial ribosomal protein S33                          |
| 7950683 | NARS2     | -1.7705259 | down | asparaginyl-tRNA synthetase 2, mitochondrial (putative)      |
| 7924029 | LAMB3     | -1.7719584 | down | laminin, beta 3                                              |
| 8048081 | SPAG16    | -1.7749729 | down | sperm associated antigen 16                                  |
| 7997158 | MARVELD3  | -1.7751701 | down | MARVEL domain containing 3                                   |
| 7936673 | RGS10     | -1.7768664 | down | regulator of G-protein signaling 10                          |
| 7943795 | C11orf52  | -1.7778007 | down | chromosome 11 open reading frame 52                          |
| 7960984 | PZP       | -1.7782712 | down | pregnancy-zone protein                                       |
| 8097307 | INTU      | -1.7782791 | down | inturned planar cell polarity effector homolog (Drosophila   |
| 7970810 | SLC7A1    | -1.7786069 | down | solute carrier family 7 (cationic amino acid transporter, y+ |
| 8069620 | MRPL39    | -1.7786666 | down | mitochondrial ribosomal protein L39                          |
| 8100478 | AASDH     | -1.7797648 | down | aminoadipate-semialdehyde dehydrogenase                      |
| 8066939 | B4GALT5   | -1.7808596 | down | UDP-Gal:betaGlcNAc beta 1,4- galactosyltransferase, poly     |
| 8082244 | OR7E37P   | -1.7810464 | down | olfactory receptor, family 7, subfamily E, member 37 pseu    |
| 8044849 | PTPN4     | -1.7810518 | down | protein tyrosine phosphatase, non-receptor type 4 (mega      |
| 8025828 | LDLR      | -1.7814898 | down | low density lipoprotein receptor (familial hypercholesterol  |
| 8017150 | TUBD1     | -1.7820812 | down | tubulin, delta 1                                             |

Supplemental Table 1a  
eMSC vs. eEP

|         |               |            |      |                                                              |
|---------|---------------|------------|------|--------------------------------------------------------------|
| 7932885 | ARHGAP12      | -1.7822552 | down | Rho GTPase activating protein 12                             |
| 7929562 | ZNF518A       | -1.7828622 | down | zinc finger protein 518A                                     |
| 8111129 | ZNF622        | -1.7831303 | down | zinc finger protein 622                                      |
| 7898693 | ALPL          | -1.7879657 | down | alkaline phosphatase, liver/bone/kidney                      |
| 8018264 | C17orf28      | -1.7893447 | down | chromosome 17 open reading frame 28                          |
| 8081001 | ROBO2         | -1.7899853 | down | roundabout, axon guidance receptor, homolog 2 (Drosophila)   |
| 8113103 | KIAA0825      | -1.7909367 | down |                                                              |
| 7986350 | ARRDC4        | -1.7918159 | down | arrestin domain containing 4                                 |
| 7970546 | EFHA1         | -1.793897  | down | EF-hand domain family, member A1                             |
| 8121043 | ORC3L         | -1.7948099 | down | origin recognition complex, subunit 3-like (yeast)           |
| 8128013 | RARS2         | -1.794933  | down | arginyl-tRNA synthetase 2, mitochondrial                     |
| 8094456 | LOC389203     | -1.7953464 | down | hypothetical gene supported by BC032431                      |
| 8151369 | RPESP         | -1.79556   | down | RPE-spondin                                                  |
| 8021275 | POLI          | -1.7975384 | down | polymerase (DNA directed) iota                               |
| 7932637 | ANKRD26       | -1.7986891 | down | ankyrin repeat domain 26                                     |
| 7918725 | TRIM33        | -1.7989401 | down | tripartite motif-containing 33                               |
| 7967456 | RILPL2        | -1.8009397 | down | Rab interacting lysosomal protein-like 2                     |
| 8030991 | LOC147804     | -1.8018204 | down | tropomyosin 3 pseudogene                                     |
| 8041257 | SLC30A6       | -1.8039382 | down | solute carrier family 30 (zinc transporter), member 6        |
| 8152597 | MRPL13        | -1.8041054 | down | mitochondrial ribosomal protein L13                          |
| 8081953 | GTF2E1        | -1.8056154 | down | general transcription factor IIE, polypeptide 1, alpha 56kD  |
| 8034315 | ZNF823        | -1.805636  | down | zinc finger protein 823                                      |
| 8056829 | CIR           | -1.8069685 | down | CBF1 interacting corepressor                                 |
| 7916343 | YIPF1         | -1.8073807 | down | Yip1 domain family, member 1                                 |
| 7954559 | PPFIBP1       | -1.8086171 | down | PTPRF interacting protein, binding protein 1 (liprin beta 1) |
| 7930818 | DKFZp781N1041 | -1.8092387 | down | similar to RIKEN cDNA 6430537H07 gene                        |
| 8120431 | PTP4A1        | -1.8111018 | down | protein tyrosine phosphatase type IVA, member 1              |
| 7982829 | SPINT1        | -1.8117577 | down | serine peptidase inhibitor, Kunitz type 1                    |
| 7909689 | SMYD2         | -1.8118833 | down | SET and MYND domain containing 2                             |
| 7959638 | TCTN2         | -1.8126259 | down | tectonic family member 2                                     |
| 7973840 | ARHGAP5       | -1.8144679 | down | Rho GTPase activating protein 5                              |
| 7904907 | BCL9          | -1.8160702 | down | B-cell CLL/lymphoma 9                                        |
| 7922523 | LOC730167     | -1.8162538 | down | similar to protein tyrosine phosphatase 4a1                  |

Supplemental Table 1a  
eMSC vs. eEP

|         |                 |            |      |                                                             |
|---------|-----------------|------------|------|-------------------------------------------------------------|
| 8069553 | NRIP1           | -1.8168925 | down | nuclear receptor interacting protein 1                      |
| 8096938 | LARP7           | -1.8173314 | down | La ribonucleoprotein domain family, member 7                |
| 7932000 | KIN             | -1.8177536 | down |                                                             |
| 8119184 | RNF8            | -1.8179958 | down | ring finger protein 8                                       |
| 7919596 | LOC440570       | -1.8183243 | down |                                                             |
| 7955613 | KRT7            | -1.8186858 | down | keratin 7                                                   |
| 7919580 | LOC440570       | -1.8187    | down |                                                             |
| 8160332 | MLLT3           | -1.8272307 | down | myeloid/lymphoid or mixed-lineage leukemia (trithorax h     |
| 8122396 | AIG1            | -1.8284647 | down | androgen-induced 1                                          |
| 8138145 | LOC441453       | -1.8292893 | down | similar to olfactory receptor, family 7, subfamily A, memb  |
| 8177674 | GTF2H2 DKFZP686 | -1.8296415 | down | general transcription factor IIH, polypeptide 2, 44kDa   ge |
| 8147101 | E2F5            | -1.8303909 | down | E2F transcription factor 5, p130-binding                    |
| 8058373 | WDR12           | -1.8307624 | down | WD repeat domain 12                                         |
| 8123303 | PACRG           | -1.8309108 | down | PARK2 co-regulated                                          |
| 7964997 | CAPS2           | -1.8311653 | down | calcyphosine 2                                              |
| 7967107 | C12orf27        | -1.8329985 | down | chromosome 12 open reading frame 27                         |
| 8000003 | THUMPD1         | -1.8345221 | down | THUMP domain containing 1                                   |
| 8171708 | CXorf23         | -1.8351507 | down | chromosome X open reading frame 23                          |
| 8052250 | MTIF2           | -1.8353008 | down | mitochondrial translational initiation factor 2             |
| 7941401 | OVOL1           | -1.8359685 | down | ovo-like 1(Drosophila)                                      |
| 8116494 | ZFP62           | -1.8380637 | down | zinc finger protein 62 homolog (mouse)                      |
| 7916356 | C1orf41         | -1.8436604 | down | chromosome 1 open reading frame 41                          |
| 7900159 | DNALI1          | -1.843699  | down | dynein, axonemal, light intermediate chain 1                |
| 8017162 | RNFT1           | -1.8443304 | down | ring finger protein, transmembrane 1                        |
| 8089026 | STX19           | -1.846077  | down | syntaxin 19                                                 |
| 7915170 | MYCBP GJA9      | -1.8486081 | down | c-myc binding protein   gap junction protein, alpha 9, 59k  |
| 7991453 | LOC400451       | -1.8491899 | down | hypothetical gene supported by AK075564; BC060873           |
| 8067113 | ZNF217          | -1.8531001 | down | zinc finger protein 217                                     |
| 7959123 | PRKAB1          | -1.8560698 | down | protein kinase, AMP-activated, beta 1 non-catalytic subun   |
| 8070297 | ERG             | -1.8566804 | down | v-ets erythroblastosis virus E26 oncogene homolog (avian    |
| 8156167 | MAK10           | -1.8586307 | down |                                                             |
| 8096091 | THAP9           | -1.8588698 | down | THAP domain containing 9                                    |
| 8161575 | CBWD5 CBWD3 C   | -1.8592019 | down | COBW domain containing 5   COBW domain containing 3         |

Supplemental Table 1a  
eMSC vs. eEP

|         |                  |            |      |                                                               |
|---------|------------------|------------|------|---------------------------------------------------------------|
| 7954382 | PYROXD1          | -1.8633435 | down | pyridine nucleotide-disulphide oxidoreductase domain 1        |
| 7904930 | GPR89B GPR89A C  | -1.8637071 | down | G protein-coupled receptor 89B   G protein-coupled receptor   |
| 7955637 | KRT18            | -1.8637285 | down | keratin 18                                                    |
| 8110520 | LOC729595        | -1.8642236 | down | similar to high-mobility group box 3                          |
| 7983478 | C15orf48         | -1.8643346 | down | chromosome 15 open reading frame 48                           |
| 7954985 | TMEM117          | -1.8656995 | down | transmembrane protein 117                                     |
| 8092726 | CLDN1            | -1.8668498 | down | claudin 1                                                     |
| 8089954 | IQCB1            | -1.8670518 | down | IQ motif containing B1                                        |
| 8001547 | PLLP             | -1.8696543 | down | plasma membrane proteolipid (plasmolipin)                     |
| 8054517 | FLJ38359 LOC4408 | -1.8699552 | down | hypothetical protein FLJ38359   hypothetical protein LOC      |
| 8172035 | DYNLT3           | -1.8699923 | down | dynein, light chain, Tctex-type 3                             |
| 8166049 | PRPS2            | -1.8708905 | down | phosphoribosyl pyrophosphate synthetase 2                     |
| 7954245 | PLEKHA5          | -1.8720016 | down | pleckstrin homology domain containing, family A member        |
| 8163437 | SLC46A2          | -1.8751997 | down | solute carrier family 46, member 2                            |
| 7919251 | GPR89B GPR89A C  | -1.8753003 | down | G protein-coupled receptor 89B   G protein-coupled receptor   |
| 8105918 | GTF2H2 DKFZP686I | -1.8764366 | down | general transcription factor IIH, polypeptide 2, 44kDa   gene |
| 8107942 | RAD50            | -1.877261  | down |                                                               |
| 8031825 | ZNF587           | -1.8785805 | down | zinc finger protein 587                                       |
| 7914996 | C1orf149         | -1.8801843 | down | chromosome 1 open reading frame 149                           |
| 8053648 | KRCC1            | -1.8804975 | down | lysine-rich coiled-coil 1                                     |
| 8112202 | PLK2             | -1.8811617 | down | polo-like kinase 2 (Drosophila)                               |
| 7954077 | KIAA1467         | -1.8826741 | down |                                                               |
| 8123342 | FGFR1OP CCR6     | -1.8830514 | down | FGFR1 oncogene partner   chemokine (C-C motif) receptor       |
| 8015412 | JUP              | -1.8831033 | down | junction plakoglobin                                          |
| 7969390 | PIBF1            | -1.8848864 | down | progesterone immunomodulatory binding factor 1                |
| 8105970 | GTF2H2 DKFZP686I | -1.8854207 | down | general transcription factor IIH, polypeptide 2, 44kDa   gene |
| 8150565 | RNF170           | -1.885468  | down | ring finger protein 170                                       |
| 7938348 | WEE1             | -1.8860885 | down |                                                               |
| 7932023 | USP6NL           | -1.8869536 | down | USP6 N-terminal like                                          |
| 8125537 | HLA-DMA          | -1.8911299 | down | major histocompatibility complex, class II, DM alpha          |
| 7985089 | RCN2             | -1.8922012 | down | reticulocalbin 2, EF-hand calcium binding domain              |
| 8152453 | TRPS1            | -1.8942027 | down | trichorhinophalangeal syndrome I                              |
| 8046428 | RAPGEF4          | -1.8963798 | down | Rap guanine nucleotide exchange factor (GEF) 4                |

Supplemental Table 1a  
eMSC vs. eEP

|         |                  |            |      |                                                             |
|---------|------------------|------------|------|-------------------------------------------------------------|
| 8112538 | GTF2H2 DKFZP686I | -1.8971602 | down | general transcription factor IIH, polypeptide 2, 44kDa   ge |
| 7923967 | YOD1             | -1.8978543 | down |                                                             |
| 8161537 | CBWD3 CBWD1 CF   | -1.899326  | down | COBW domain containing 3   COBW domain containing 1         |
| 8002481 | HYDIN HYDIN2     | -1.9010184 | down | hydrocephalus inducing homolog (mouse)   hydrocephalu       |
| 7917255 | SSX2IP           | -1.9020945 | down | synovial sarcoma, X breakpoint 2 interacting protein        |
| 8044613 | CBWD1 CBWD3 CF   | -1.9030644 | down | COBW domain containing 1   COBW domain containing 3         |
| 8009685 | SLC9A3R1         | -1.9043391 | down | solute carrier family 9 (sodium/hydrogen exchanger), mer    |
| 8068612 | WRB              | -1.9048611 | down | tryptophan rich basic protein                               |
| 8136495 | TTC26            | -1.9052973 | down | tetratricopeptide repeat domain 26                          |
| 8088745 | FRMD4B           | -1.905645  | down | FERM domain containing 4B                                   |
| 8177507 | GTF2H2 DKFZP686I | -1.9057466 | down | general transcription factor IIH, polypeptide 2, 44kDa   ge |
| 8018922 | PSCD1            | -1.9077554 | down | pleckstrin homology, Sec7 and coiled-coil domains 1(cytof   |
| 8130765 | FAM103A1         | -1.9079216 | down | family with sequence similarity 103, member A1              |
| 8155636 | CBWD3 CBWD1 CF   | -1.9102414 | down | COBW domain containing 3   COBW domain containing 1         |
| 8167305 | EBP              | -1.9107727 | down | emopamil binding protein (sterol isomerase)                 |
| 8097841 | TRIM2            | -1.9116656 | down | tripartite motif-containing 2                               |
| 8157021 | NIPSNAP3A        | -1.9132895 | down | nipsnap homolog 3A (C. elegans)                             |
| 8140140 | CLDN3            | -1.9133568 | down | claudin 3                                                   |
| 8130499 | DYNLT1           | -1.915354  | down | dynein, light chain, Tctex-type 1                           |
| 7904314 | TTF2             | -1.9169843 | down | transcription termination factor, RNA polymerase II         |
| 8165024 | C9orf116         | -1.9197928 | down | chromosome 9 open reading frame 116                         |
| 8002283 | TMED6            | -1.92188   | down | transmembrane emp24 protein transport domain contain        |
| 8070467 | TMPRSS2          | -1.9239621 | down | transmembrane protease, serine 2                            |
| 7969861 | ITGBL1           | -1.9256233 | down | integrin, beta-like 1 (with EGF-like repeat domains)        |
| 8155422 | CBWD5 CBWD2 CF   | -1.9259285 | down | COBW domain containing 5   COBW domain containing 2         |
| 8148280 | SQLE             | -1.9262713 | down | squalene epoxidase                                          |
| 8131975 | TAX1BP1          | -1.9268616 | down | Tax1 (human T-cell leukemia virus type I) binding protein : |
| 8007176 | TTC25            | -1.927017  | down | tetratricopeptide repeat domain 25                          |
| 7934278 | P4HA1            | -1.9274147 | down | procollagen-proline, 2-oxoglutarate 4-dioxygenase (prolin   |
| 8012450 | SLC25A35         | -1.9287472 | down | solute carrier family 25, member 35                         |
| 7993638 | TMC5             | -1.9297359 | down | transmembrane channel-like 5                                |
| 8129497 | EPB41L2          | -1.9313216 | down | erythrocyte membrane protein band 4.1-like 2                |
| 8027254 | ZNF90            | -1.9332045 | down | zinc finger protein 90                                      |



Supplemental Table 1a  
eMSC vs. eEP

|         |                  |            |      |                                                            |
|---------|------------------|------------|------|------------------------------------------------------------|
| 8152041 | RNF19A           | -1.9363619 | down | ring finger protein 19A                                    |
| 8044333 | LIMS3 LOC729260  | -1.9375298 | down | LIM and senescent cell antigen-like domains 3   similar to |
| 8054519 | LIMS3 LOC729260  | -1.938481  | down | LIM and senescent cell antigen-like domains 3   similar to |
| 8163002 | KLF4             | -1.9402674 | down | Kruppel-like factor 4 (gut)                                |
| 7974816 | SLC38A6          | -1.941838  | down | solute carrier family 38, member 6                         |
| 7926531 | ARL5B            | -1.9425013 | down | ADP-ribosylation factor-like 5B                            |
| 8121886 | HINT3            | -1.9427643 | down | histidine triad nucleotide binding protein 3               |
| 8097704 | TMEM34           | -1.944568  | down | transmembrane protein 34                                   |
| 8135405 | GPR22            | -1.944763  | down | G protein-coupled receptor 22                              |
| 7918467 | C1orf103         | -1.9453684 | down | chromosome 1 open reading frame 103                        |
| 7945204 | ST14             | -1.9464098 | down | suppression of tumorigenicity 14 (colon carcinoma)         |
| 8044346 | FLJ38359 LOC1001 | -1.9470868 | down | hypothetical protein FLJ38359   hypothetical protein LOC:  |
| 8121161 | KIAA0776         | -1.947465  | down |                                                            |
| 7907104 | IQWD1            | -1.9533352 | down | IQ motif and WD repeats 1                                  |
| 7985488 | FAM103A1         | -1.9555191 | down | family with sequence similarity 103, member A1             |
| 8127743 | HMGN3            | -1.9560317 | down | high mobility group nucleosomal binding domain 3           |
| 7957793 | ACTR6            | -1.9578111 | down | ARP6 actin-related protein 6 homolog (yeast)               |
| 7938683 | LOC441453        | -1.9585143 | down | similar to olfactory receptor, family 7, subfamily A, memb |
| 7918759 | BCAS2 DENND2C    | -1.9610305 | down | breast carcinoma amplified sequence 2   DENN/MADD dc       |
| 8011832 | NUP88            | -1.9618627 | down | nucleoporin 88kDa                                          |
| 8020037 | KIAA0802         | -1.9637893 | down |                                                            |
| 7943162 | C11orf54         | -1.9672064 | down | chromosome 11 open reading frame 54                        |
| 8103563 | DDX60            | -1.9674351 | down | DEAD (Asp-Glu-Ala-Asp) box polypeptide 60                  |
| 8107673 | GRAMD3           | -1.9689674 | down | GRAM domain containing 3                                   |
| 8048725 | MOGAT1           | -1.9704645 | down | monoacylglycerol O-acyltransferase 1                       |
| 7951429 | KBTBD3           | -1.9740396 | down | kelch repeat and BTB (POZ) domain containing 3             |
| 7946815 | PIK3C2A          | -1.9757022 | down | phosphoinositide-3-kinase, class 2, alpha polypeptide      |
| 7904853 | GPR89C GPR89A    | -1.9771951 | down | G protein-coupled receptor 89C   G protein-coupled recep   |
| 7904361 | FAM46C           | -1.9781364 | down | family with sequence similarity 46, member C               |
| 8123101 | LOC100130967 C6c | -1.9795306 | down | similar to hCG2044932   chromosome 6 open reading fran     |
| 8166455 | PRDX4            | -1.9810281 | down | peroxiredoxin 4                                            |
| 8048733 | ACSL3            | -1.9822712 | down | acyl-CoA synthetase long-chain family member 3             |
| 8178884 | HLA-DMA          | -1.9829843 | down | major histocompatibility complex, class II, DM alpha       |

Supplemental Table 1a  
eMSC vs. eEP

|         |                  |            |      |                                                                     |
|---------|------------------|------------|------|---------------------------------------------------------------------|
| 8104901 | IL7R             | -1.9832705 | down | interleukin 7 receptor                                              |
| 7969414 | KLF5             | -1.9836302 | down | Kruppel-like factor 5 (intestinal)                                  |
| 8044882 | EPB41L5          | -1.9851134 | down | erythrocyte membrane protein band 4.1 like 5                        |
| 8058203 | ALS2CR12         | -1.9853202 | down | amyotrophic lateral sclerosis 2 (juvenile) chromosome reg           |
| 7965918 | NT5DC3           | -1.9854958 | down | 5'-nucleotidase domain containing 3                                 |
| 8104066 | SORBS2           | -1.9863296 | down | sorbin and SH3 domain containing 2                                  |
| 8063351 | SLC9A8           | -1.9873468 | down | solute carrier family 9 (sodium/hydrogen exchanger), mer            |
| 7920128 | S100A11          | -1.988022  | down | S100 calcium binding protein A11                                    |
| 7938834 | NAV2             | -1.9891105 | down | neuron navigator 2                                                  |
| 7975772 | C14orf140        | -1.9915373 | down | chromosome 14 open reading frame 140                                |
| 8122409 | PEX3             | -1.9924288 | down | peroxisomal biogenesis factor 3                                     |
| 8151942 | HRSP12           | -1.9925671 | down | heat-responsive protein 12                                          |
| 7907171 | BLZF1            | -1.992633  | down | basic leucine zipper nuclear factor 1 (JEM-1)                       |
| 7923578 | FMOD             | -1.9930636 | down | fibromodulin                                                        |
| 8178802 | HLA-DRB3 HLA-DRI | -1.9935645 | down |                                                                     |
| 7975081 | C14orf50         | -1.9943486 | down | chromosome 14 open reading frame 50                                 |
| 8074286 | MICAL3           | -1.9954145 | down | microtubule associated monooxygenase, calponin and LIM              |
| 8180086 | HLA-DMA          | -1.9972495 | down | major histocompatibility complex, class II, DM alpha                |
| 7972157 | EDNRB            | -1.998324  | down | endothelin receptor type B                                          |
| 8056222 | DPP4             | -2.0022898 | down | dipeptidyl-peptidase 4 (CD26, adenosine deaminase com               |
| 8044080 | SLC9A2           | -2.0024483 | down | solute carrier family 9 (sodium/hydrogen exchanger), mer            |
| 8150797 | ATP6V1H          | -2.003312  | down | ATPase, H <sup>+</sup> transporting, lysosomal 50/57kDa, V1 subunit |
| 8166925 | MAOA             | -2.0052044 | down | monoamine oxidase A                                                 |
| 8017057 | C17orf47         | -2.005595  | down | chromosome 17 open reading frame 47                                 |
| 8058161 | ORC2L            | -2.0056148 | down | origin recognition complex, subunit 2-like (yeast)                  |
| 7917976 | SASS6            | -2.0070744 | down | spindle assembly 6 homolog (C. elegans)                             |
| 8160559 | DDX58            | -2.007794  | down | DEAD (Asp-Glu-Ala-Asp) box polypeptide 58                           |
| 7983828 | TEX9             | -2.0077953 | down | testis expressed 9                                                  |
| 8162570 | HSD17B3          | -2.0091763 | down | hydroxysteroid (17-beta) dehydrogenase 3                            |
| 7981439 | BAG5             | -2.0094109 | down | BCL2-associated athanogene 5                                        |
| 7937079 | BNIP3            | -2.0094454 | down | BCL2/adenovirus E1B 19kDa interacting protein 3                     |
| 7968872 | DNAJC15          | -2.0113177 | down | DnaJ (Hsp40) homolog, subfamily C, member 15                        |
| 7979524 | TMEM30B          | -2.0114946 | down | transmembrane protein 30B                                           |

Supplemental Table 1a  
eMSC vs. eEP

|         |                  |            |      |                                                           |
|---------|------------------|------------|------|-----------------------------------------------------------|
| 8134051 | FLJ21062         | -2.0115652 | down |                                                           |
| 8172220 | NDP              | -2.0118558 | down | Norrie disease (pseudoglioma)                             |
| 7971541 | SUCLA2           | -2.0122352 | down | succinate-CoA ligase, ADP-forming, beta subunit           |
| 8138157 | COL28A1          | -2.0124388 | down | collagen, type XXVIII, alpha 1                            |
| 8039687 | ZNF552           | -2.013652  | down | zinc finger protein 552                                   |
| 7988426 | SLC30A4          | -2.0144262 | down | solute carrier family 30 (zinc transporter), member 4     |
| 8008040 | LRRC46           | -2.0155985 | down | leucine rich repeat containing 46                         |
| 8025255 | STXBP2           | -2.0164406 | down | syntaxin binding protein 2                                |
| 8149500 | MTUS1            | -2.0172305 | down | mitochondrial tumor suppressor 1                          |
| 8052233 | C2orf63          | -2.0177033 | down | chromosome 2 open reading frame 63                        |
| 8154132 | C9orf70          | -2.0181413 | down | chromosome 9 open reading frame 70                        |
| 8097435 | C4orf33          | -2.0200162 | down | chromosome 4 open reading frame 33                        |
| 8099912 | C4orf34          | -2.0202255 | down | chromosome 4 open reading frame 34                        |
| 8050719 | ITSN2            | -2.0233483 | down | intersectin 2                                             |
| 8134122 | AKAP9            | -2.0233853 | down | A kinase (PRKA) anchor protein (yotiao) 9                 |
| 8023843 | FBXO15           | -2.0238945 | down | F-box protein 15                                          |
| 8127549 | SLC17A5          | -2.0251713 | down | solute carrier family 17 (anion/sugar transporter), membe |
| 8039068 | NDUFV2           | -2.0252714 | down | NADH dehydrogenase (ubiquinone) flavoprotein 2, 24kDa     |
| 8089627 | CCDC52           | -2.0262263 | down | coiled-coil domain containing 52                          |
| 8169995 | FAM122C          | -2.0268786 | down | family with sequence similarity 122C                      |
| 8130664 | C6orf118         | -2.029842  | down | chromosome 6 open reading frame 118                       |
| 8160346 | PTPLAD2          | -2.0302205 | down | protein tyrosine phosphatase-like A domain containing 2   |
| 7904211 | VANGL1           | -2.0303123 | down | vang-like 1 (van gogh, Drosophila)                        |
| 8113512 | EPB41L4A         | -2.0304105 | down | erythrocyte membrane protein band 4.1 like 4A             |
| 8180003 | HLA-DRB3 HLA-DRI | -2.0316806 | down |                                                           |
| 8118734 | ITPR3            | -2.032855  | down | inositol 1,4,5-triphosphate receptor, type 3              |
| 8090630 | TMCC1            | -2.0351007 | down | transmembrane and coiled-coil domain family 1             |
| 8090577 | MBD4             | -2.0353599 | down | methyl-CpG binding domain protein 4                       |
| 7995825 | MT1F             | -2.035451  | down | metallothionein 1F                                        |
| 8053484 | ST3GAL5          | -2.035593  | down | ST3 beta-galactoside alpha-2,3-sialyltransferase 5        |
| 8139198 | RWDD4A           | -2.0360615 | down | RWD domain containing 4A                                  |
| 8103881 | RWDD4A           | -2.0384223 | down | RWD domain containing 4A                                  |
| 8126710 | SUPT3H           | -2.0397484 | down | suppressor of Ty 3 homolog (S. cerevisiae)                |

Supplemental Table 1a  
eMSC vs. eEP

|         |                  |            |      |                                                             |
|---------|------------------|------------|------|-------------------------------------------------------------|
| 7984588 | THSD4            | -2.041924  | down | thrombospondin, type I, domain containing 4                 |
| 7943779 | C11orf1          | -2.0433896 | down | chromosome 11 open reading frame 1                          |
| 7980309 | C14orf1          | -2.0440583 | down | chromosome 14 open reading frame 1                          |
| 8028908 | ITPKC            | -2.04432   | down | inositol 1,4,5-trisphosphate 3-kinase C                     |
| 7945321 | GLB1L2           | -2.0481966 | down | galactosidase, beta 1-like 2                                |
| 8085852 | NGLY1            | -2.0482795 | down | N-glycanase 1                                               |
| 8121429 | FIG4             | -2.0488482 | down |                                                             |
| 8120222 | EFHC1            | -2.0498464 | down | EF-hand domain (C-terminal) containing 1                    |
| 8159919 | C9orf68          | -2.0507953 | down | chromosome 9 open reading frame 68                          |
| 8085999 | CMTM6            | -2.0523536 | down | CKLF-like MARVEL transmembrane domain containing 6          |
| 8134030 | STEAP1           | -2.0524542 | down | six transmembrane epithelial antigen of the prostate 1      |
| 8058498 | FZD5             | -2.053836  | down | frizzled homolog 5 (Drosophila)                             |
| 7933760 | CCDC6            | -2.053872  | down | coiled-coil domain containing 6                             |
| 8090091 | PTPLB            | -2.0555034 | down | protein tyrosine phosphatase-like (proline instead of catal |
| 8109938 | RANBP17          | -2.0557587 | down | RAN binding protein 17                                      |
| 8005289 | LRRC48           | -2.0563762 | down | leucine rich repeat containing 48                           |
| 8039010 | ZNF765 LOC388559 | -2.058345  | down | zinc finger protein 765   similar to hCG1778601             |
| 8089988 | CCDC58           | -2.0587072 | down | coiled-coil domain containing 58                            |
| 8076113 | RP1-199H16.1     | -2.0594344 | down | hypothetical LOC388900                                      |
| 8100251 | FRYL             | -2.0628777 | down | FRY-like                                                    |
| 7942489 | DNAJB13          | -2.063638  | down | DnaJ (Hsp40) related, subfamily B, member 13                |
| 8031837 | ZNF587           | -2.065061  | down | zinc finger protein 587                                     |
| 8168580 | APOOL            | -2.0662298 | down | apolipoprotein O-like                                       |
| 7904965 | PDE4DIP          | -2.0675304 | down | phosphodiesterase 4D interacting protein (myomegalin)       |
| 7962146 | FAM60A           | -2.069362  | down | family with sequence similarity 60, member A                |
| 8107868 | CDC42SE2         | -2.070015  | down | CDC42 small effector 2                                      |
| 8156126 | RMI1             | -2.070536  | down |                                                             |
| 8054308 | TBC1D8           | -2.0714953 | down | TBC1 domain family, member 8 (with GRAM domain)             |
| 7909877 | MOSC1            | -2.0715575 | down | MOCO sulphurase C-terminal domain containing 1              |
| 8061186 | SEC23B           | -2.0720303 | down | Sec23 homolog B (S. cerevisiae)                             |
| 8014172 | CCT6B            | -2.073076  | down | chaperonin containing TCP1, subunit 6B (zeta 2)             |
| 7975238 | PLEKHH1          | -2.0746846 | down | pleckstrin homology domain containing, family H (with M     |
| 7932703 | ACBD5            | -2.0750406 | down | acyl-Coenzyme A binding domain containing 5                 |

Supplemental Table 1a  
eMSC vs. eEP

|         |                  |            |      |                                                            |
|---------|------------------|------------|------|------------------------------------------------------------|
| 8005638 | ALDH3A2          | -2.0767398 | down | aldehyde dehydrogenase 3 family, member A2                 |
| 7971126 | STOML3           | -2.077347  | down | stomatin (EPB72)-like 3                                    |
| 8027312 | ZNF429           | -2.077431  | down | zinc finger protein 429                                    |
| 8020058 | NDUFV2           | -2.077528  | down | NADH dehydrogenase (ubiquinone) flavoprotein 2, 24kDa      |
| 7930454 | PDCD4            | -2.080529  | down | programmed cell death 4 (neoplastic transformation inhib   |
| 8106252 | HEXB             | -2.0807087 | down | hexosaminidase B (beta polypeptide)                        |
| 8126259 | C6orf130         | -2.081174  | down | chromosome 6 open reading frame 130                        |
| 8054513 | FLJ38359 LOC1001 | -2.081542  | down | hypothetical protein FLJ38359   hypothetical protein LOC   |
| 8035095 | CYP4F11          | -2.08411   | down | cytochrome P450, family 4, subfamily F, polypeptide 11     |
| 8041867 | MSH2             | -2.0888824 | down | mutS homolog 2, colon cancer, nonpolyposis type 1 (E. co   |
| 8027748 | FXD3             | -2.0912669 | down | FXD domain containing ion transport regulator 3            |
| 8095705 | MTHFD2L          | -2.0915983 | down | methylenetetrahydrofolate dehydrogenase (NADP+ deper       |
| 7925452 | GREM2            | -2.0939999 | down | gremlin 2, cysteine knot superfamily, homolog (Xenopus lae |
| 7990818 | BCL2A1           | -2.0941863 | down | BCL2-related protein A1                                    |
| 7927062 | ZNF33A           | -2.0949523 | down | zinc finger protein 33A                                    |
| 8005661 | SPECC1           | -2.0952945 | down | sperm antigen with calponin homology and coiled-coil do    |
| 8122279 | KIAA1244 LOC2024 | -2.099324  | down | KIAA1244   hypothetical protein LOC202451                  |
| 7995258 | ZNF267           | -2.1009588 | down | zinc finger protein 267                                    |
| 8122843 | ESR1             | -2.1009731 | down | estrogen receptor 1                                        |
| 8081055 | CHMP2B           | -2.1016269 | down | chromatin modifying protein 2B                             |
| 8001149 | VPS35            | -2.1037862 | down | vacuolar protein sorting 35 homolog (S. cerevisiae)        |
| 8108435 | UBE2D2           | -2.103892  | down | ubiquitin-conjugating enzyme E2D 2 (UBC4/5 homolog, ye     |
| 8070398 | LCA5L            | -2.1040168 | down | Leber congenital amaurosis 5-like                          |
| 7913787 | C1orf201         | -2.1044526 | down | chromosome 1 open reading frame 201                        |
| 7967933 | IFT88            | -2.1048377 | down | intraflagellar transport 88 homolog (Chlamydomonas)        |
| 8146024 | ADAM32           | -2.1050131 | down | ADAM metallopeptidase domain 32                            |
| 8051785 | KCNG3            | -2.1056488 | down | potassium voltage-gated channel, subfamily G, member 3     |
| 7953518 | LOC171220        | -2.105669  | down | destrin-2 pseudogene                                       |
| 8111136 | FAM134B          | -2.1057281 | down | family with sequence similarity 134, member B              |
| 7973067 | NP               | -2.105785  | down | nucleoside phosphorylase                                   |
| 8150830 | LYPLA1           | -2.1073525 | down | lysophospholipase I                                        |
| 7982271 | FAM7A1 GOLGA9P   | -2.1095293 | down | family with sequence similarity 7, member A1   golgi auto  |
| 7916629 | C1orf87          | -2.109648  | down | chromosome 1 open reading frame 87                         |

Supplemental Table 1a  
eMSC vs. eEP

|         |                 |            |      |                                                               |
|---------|-----------------|------------|------|---------------------------------------------------------------|
| 8022646 | KCTD1           | -2.1124191 | down | potassium channel tetramerisation domain containing 1         |
| 8030931 | ZNF528          | -2.1146405 | down | zinc finger protein 528                                       |
| 8097373 | C4orf29         | -2.114651  | down | chromosome 4 open reading frame 29                            |
| 8174474 | ACSL4           | -2.115634  | down | acyl-CoA synthetase long-chain family member 4                |
| 7918694 | BCL2L15         | -2.116223  | down | BCL2-like 15                                                  |
| 8097920 | LRAT            | -2.117023  | down | lecithin retinol acyltransferase (phosphatidylcholine--retir  |
| 8168412 | LOC554203       | -2.117059  | down |                                                               |
| 8144516 | THEX1           | -2.117252  | down | three prime histone mRNA exonuclease 1                        |
| 8173310 | OPHN1           | -2.1245327 | down | oligophrenin 1                                                |
| 8016444 | HOXB3           | -2.1249688 | down | homeobox B3                                                   |
| 7969114 | SETDB2          | -2.127616  | down | SET domain, bifurcated 2                                      |
| 8174779 | LAMP2           | -2.1278799 | down | lysosomal-associated membrane protein 2                       |
| 8169580 | IL13RA1         | -2.1280334 | down | interleukin 13 receptor, alpha 1                              |
| 8097670 | MMAA            | -2.1287634 | down | methylmalonic aciduria (cobalamin deficiency) cblA type       |
| 8129666 | SLC2A12         | -2.1292226 | down | solute carrier family 2 (facilitated glucose transporter), me |
| 8068620 | SH3BGR          | -2.1311982 | down | SH3 domain binding glutamic acid-rich protein                 |
| 8073645 | SAMM50 LOC1001  | -2.131854  | down | sorting and assembly machinery component 50 homolog (         |
| 8039006 | ZNF320          | -2.1324365 | down | zinc finger protein 320                                       |
| 8095758 | RCHY1           | -2.133204  | down | ring finger and CHY zinc finger domain containing 1           |
| 7977592 | GAF1            | -2.1344807 | down |                                                               |
| 7989037 | CCPG1           | -2.1362832 | down | cell cycle progression 1                                      |
| 8122561 | C6orf103        | -2.139923  | down | chromosome 6 open reading frame 103                           |
| 7969544 | NDFIP2          | -2.1417475 | down | Nedd4 family interacting protein 2                            |
| 8070584 | TMPRSS3         | -2.1440527 | down | transmembrane protease, serine 3                              |
| 7968035 | SPATA13 C1QTNF9 | -2.1442225 | down | spermatogenesis associated 13   C1q and tumor necrosis        |
| 7971335 | CCDC122         | -2.1454034 | down | coiled-coil domain containing 122                             |
| 8041422 | RASGRP3         | -2.146419  | down | RAS guanyl releasing protein 3 (calcium and DAG-regulate      |
| 8105111 | FBXO4           | -2.1465728 | down | F-box protein 4                                               |
| 8156321 | SYK             | -2.147875  | down | spleen tyrosine kinase                                        |
| 8074845 | ZNF280B         | -2.1514041 | down | zinc finger protein 280B                                      |
| 8004957 | DNAH9           | -2.1567118 | down | dynein, axonemal, heavy chain 9                               |
| 7905677 | CREB3L4         | -2.157248  | down | cAMP responsive element binding protein 3-like 4              |
| 8035842 | ZNF91           | -2.1575184 | down | zinc finger protein 91                                        |

Supplemental Table 1a  
eMSC vs. eEP

|         |                  |            |      |                                                           |
|---------|------------------|------------|------|-----------------------------------------------------------|
| 8175269 | FAM122B          | -2.1592274 | down | family with sequence similarity 122B                      |
| 8112596 | ANKRA2           | -2.1603987 | down | ankyrin repeat, family A (RFXANK-like), 2                 |
| 7983469 | SPATA5L1         | -2.1609104 | down | spermatogenesis associated 5-like 1                       |
| 7979732 | VTI1B            | -2.1611621 | down | vesicle transport through interaction with t-SNAREs homo  |
| 8063729 | EDN3             | -2.1617076 | down | endothelin 3                                              |
| 7903908 | CEPT1            | -2.1623158 | down | choline/ethanolamine phosphotransferase 1                 |
| 8034393 | ZNF443           | -2.1631234 | down | zinc finger protein 443                                   |
| 8092392 | KLHL6            | -2.1633406 | down | kelch-like 6 (Drosophila)                                 |
| 8172056 | RPGR             | -2.1653135 | down | retinitis pigmentosa GTPase regulator                     |
| 8178811 | HLA-DRB3 HLA-DRI | -2.167779  | down |                                                           |
| 7953873 | OVOS2            | -2.1686404 | down | ovostatin 2                                               |
| 8109773 | WWC1             | -2.170588  | down | WW and C2 domain containing 1                             |
| 7979378 | C14orf105        | -2.1709292 | down | chromosome 14 open reading frame 105                      |
| 8047403 | CASP10           | -2.1715834 | down | caspace 10, apoptosis-related cysteine peptidase          |
| 7918902 | CD58             | -2.1719842 | down |                                                           |
| 8038967 | ZNF83            | -2.172646  | down | zinc finger protein 83                                    |
| 8038981 | ZNF611           | -2.1736648 | down | zinc finger protein 611                                   |
| 8128592 | ATG5             | -2.1761386 | down |                                                           |
| 8179351 | CFB              | -2.176709  | down | complement factor B                                       |
| 8178470 | POU5F1 POU5F1P1  | -2.1769407 | down | POU class 5 homeobox 1   POU class 5 homeobox 1 pseuc     |
| 8021496 | KIAA1468         | -2.1798277 | down |                                                           |
| 8091283 | PLOD2            | -2.1799712 | down | procollagen-lysine, 2-oxoglutarate 5-dioxygenase 2        |
| 8097056 | SNORA24          | -2.1808267 | down | small nucleolar RNA, H/ACA box 24                         |
| 8081710 | SIDT1            | -2.181844  | down | SID1 transmembrane family, member 1                       |
| 7902290 | CTH              | -2.1838918 | down | cystathionase (cystathionine gamma-lyase)                 |
| 7931754 | IDI1             | -2.1843193 | down | isopentenyl-diphosphate delta isomerase 1                 |
| 8096061 | C4orf22          | -2.1848276 | down | chromosome 4 open reading frame 22                        |
| 8138857 | C7orf24          | -2.186006  | down | chromosome 7 open reading frame 24                        |
| 8044605 | LOC654433        | -2.1863284 | down |                                                           |
| 8108251 | NPY6R            | -2.187822  | down | neuropeptide Y receptor Y6 (pseudogene)                   |
| 8094132 | DUB4 USP17 DUB4  | -2.1878564 | down | deubiquitinating enzyme DUB4   ubiquitin specific peptid: |
| 8094118 | DUB4 USP17 DUB4  | -2.1879153 | down | deubiquitinating enzyme DUB4   ubiquitin specific peptid: |
| 8094120 | DUB4 USP17 DUB4  | -2.1886187 | down | deubiquitinating enzyme DUB4   ubiquitin specific peptid: |

Supplemental Table 1a  
eMSC vs. eEP

|         |                   |            |      |                                                                                                                       |
|---------|-------------------|------------|------|-----------------------------------------------------------------------------------------------------------------------|
| 8094126 | DUB4 USP17 DUB3   | -2.1899385 | down | deubiquitinating enzyme DUB4   ubiquitin specific peptidase 17                                                        |
| 7925672 | ZNF670            | -2.1901755 | down | zinc finger protein 670                                                                                               |
| 8094116 | CPZ USP17 DUB3    | -2.1904156 | down | carboxypeptidase Z   ubiquitin specific peptidase 17   deubiquitinating enzyme DUB4   ubiquitin specific peptidase 17 |
| 7965486 | CCDC41            | -2.1914768 | down | coiled-coil domain containing 41                                                                                      |
| 8094128 | DUB4 USP17 DUB3   | -2.192078  | down | deubiquitinating enzyme DUB4   ubiquitin specific peptidase 17                                                        |
| 7997453 | PLCG2             | -2.1925657 | down | phospholipase C, gamma 2 (phosphatidylinositol-specific)                                                              |
| 8095894 | MRPL1             | -2.1965258 | down | mitochondrial ribosomal protein L1                                                                                    |
| 8094124 | DUB4 USP17 DUB3   | -2.1969182 | down | deubiquitinating enzyme DUB4   ubiquitin specific peptidase 17                                                        |
| 8138277 | FLJ14712          | -2.197244  | down |                                                                                                                       |
| 8047577 | ALS2CR8           | -2.1983366 | down | amyotrophic lateral sclerosis 2 (juvenile) chromosome region                                                          |
| 7914809 | KIAA0319L         | -2.2002604 | down | KIAA0319-like                                                                                                         |
| 7925130 | TARBP1            | -2.2006347 | down | TAR (HIV-1) RNA binding protein 1                                                                                     |
| 8021966 | ENOSF1            | -2.200894  | down | enolase superfamily member 1                                                                                          |
| 8149521 | FGL1              | -2.2011855 | down | fibrinogen-like 1                                                                                                     |
| 8094122 | DUB4 USP17 DUB3   | -2.203262  | down | deubiquitinating enzyme DUB4   ubiquitin specific peptidase 17                                                        |
| 8157038 | SLC44A1           | -2.2056658 | down | solute carrier family 44, member 1                                                                                    |
| 7907297 | FMO4              | -2.207889  | down | flavin containing monooxygenase 4                                                                                     |
| 8122242 | PEX7              | -2.2087104 | down | peroxisomal biogenesis factor 7                                                                                       |
| 7976571 | C14orf129         | -2.2106316 | down | chromosome 14 open reading frame 129                                                                                  |
| 7938989 | GAS2              | -2.2110753 | down | growth arrest-specific 2                                                                                              |
| 7923131 | DENND1B C1orf211  | -2.2134604 | down | DENN/MADD domain containing 1B   chromosome 1 open reading frame 211                                                  |
| 8044236 | GCC2              | -2.2149239 | down | GRIP and coiled-coil domain containing 2                                                                              |
| 7933750 | SLC16A9           | -2.2173684 | down | solute carrier family 16, member 9 (monocarboxylic acid transporter)                                                  |
| 7965573 | NTN4              | -2.2190282 | down | netrin 4                                                                                                              |
| 8171006 | BRCC3             | -2.22025   | down | BRCA1/BRCA2-containing complex, subunit 3                                                                             |
| 8052382 | FANCL             | -2.2206986 | down | Fanconi anemia, complementation group L                                                                               |
| 8030914 | ZNF610            | -2.2209127 | down | zinc finger protein 610                                                                                               |
| 7952927 | B4GALNT3          | -2.2252185 | down | beta-1,4-N-acetyl-galactosaminyl transferase 3                                                                        |
| 8147273 | SLC26A7 LOC100131 | -2.2259903 | down | solute carrier family 26, member 7   similar to hCG20085                                                              |
| 7973108 | LOC643332         | -2.22793   | down | similar to Nonsecretory ribonuclease precursor (Ribonuclease H2B)                                                     |
| 7959681 | DNAH10            | -2.228881  | down | dynein, axonemal, heavy chain 10                                                                                      |
| 8113413 | NUDT12            | -2.230367  | down | nudix (nucleoside diphosphate linked moiety X)-type motif domain containing 12                                        |
| 7899455 | PHACTR4           | -2.2313352 | down | phosphatase and actin regulator 4                                                                                     |



Supplemental Table 1a  
eMSC vs. eEP

|         |                           |            |      |                                                                   |
|---------|---------------------------|------------|------|-------------------------------------------------------------------|
| 8088642 | LRIG1                     | -2.2318642 | down | leucine-rich repeats and immunoglobulin-like domains 1            |
| 8096556 | METAP1                    | -2.23269   | down | methionyl aminopeptidase 1                                        |
| 7935692 | ERLIN1                    | -2.2343247 | down | ER lipid raft associated 1                                        |
| 7946439 | TMEM9B                    | -2.2358084 | down | TMEM9 domain family, member B                                     |
| 7936346 | ZDHHC6                    | -2.2364168 | down | zinc finger, DHHC-type containing 6                               |
| 7922243 | C1orf156                  | -2.2366552 | down | chromosome 1 open reading frame 156                               |
| 8173812 | NSBP1                     | -2.23803   | down | nucleosomal binding protein 1                                     |
| 8113050 | CETN3                     | -2.239932  | down | centrin, EF-hand protein, 3 (CDC31 homolog, yeast)                |
| 8016457 | HOXB5                     | -2.2415724 | down | homeobox B5                                                       |
| 7959330 | WDR66                     | -2.2416337 | down | WD repeat domain 66                                               |
| 8042086 | VRK2                      | -2.2421515 | down | vaccinia related kinase 2                                         |
| 7931081 | PLEKHA1                   | -2.2441928 | down | pleckstrin homology domain containing, family A (phospho)         |
| 8150112 | GSR                       | -2.2463071 | down | glutathione reductase                                             |
| 8128788 | FLJ42177 C6orf199         | -2.2466238 | down | FLJ42177 protein   chromosome 6 open reading frame 19             |
| 8020495 | CABLES1                   | -2.2500033 | down | Cdk5 and Abl enzyme substrate 1                                   |
| 8174351 | NUP62CL                   | -2.2502286 | down | nucleoporin 62kDa C-terminal like                                 |
| 8039017 | ZNF816A ZNF321            | -2.2504916 | down | zinc finger protein 816A   zinc finger protein 321                |
| 8137526 | INSIG1                    | -2.2508724 | down | insulin induced gene 1                                            |
| 8094130 | DUB4 USP17 DUB3           | -2.2512631 | down | deubiquitinating enzyme DUB4   ubiquitin specific peptidase 17    |
| 7961075 | CD69                      | -2.2525961 | down | CD69                                                              |
| 8074237 | CECR1                     | -2.2540176 | down | cat eye syndrome chromosome region, candidate 1                   |
| 8143221 | ATP6V0A4                  | -2.2556005 | down | ATPase, H <sup>+</sup> transporting, lysosomal V0 subunit a4      |
| 7969428 | UCHL3                     | -2.2562387 | down | ubiquitin carboxyl-terminal esterase L3 (ubiquitin thiolesterase) |
| 8175023 | ZDHHC9                    | -2.258673  | down | zinc finger, DHHC-type containing 9                               |
| 7947156 | MUC15                     | -2.2600048 | down | mucin 15, cell surface associated                                 |
| 8067055 | ATP9A                     | -2.2626534 | down | ATPase, class II, type 9A                                         |
| 7907657 | RALGPS2                   | -2.263546  | down | Ral GEF with PH domain and SH3 binding motif 2                    |
| 8082100 | PARP14                    | -2.2636003 | down | poly (ADP-ribose) polymerase family, member 14                    |
| 8168466 | LOC100129513 LOC100129514 | -2.263613  | down | similar to PRO0756   magnesium transporter 1                      |
| 8098500 | CDKN2AIP                  | -2.2637765 | down | CDKN2A interacting protein                                        |
| 8037374 | PLAUR                     | -2.2642112 | down | plasminogen activator, urokinase receptor                         |
| 7902592 | ARID3B                    | -2.2667058 | down | AT rich interactive domain 3B (BRIGHT-like)                       |
| 8169949 | RP6-213H19.1              | -2.2684596 | down | serine/threonine protein kinase MST4                              |

Supplemental Table 1a  
eMSC vs. eEP

|         |                 |            |      |                                                                      |
|---------|-----------------|------------|------|----------------------------------------------------------------------|
| 8094759 | NSUN7           | -2.273977  | down | NOL1/NOP2/Sun domain family, member 7                                |
| 7970455 | CRYL1           | -2.2782273 | down | crystallin, lambda 1                                                 |
| 8094378 | PI4K2B          | -2.2797344 | down | phosphatidylinositol 4-kinase type 2 beta                            |
| 8097513 | MGST2           | -2.2803068 | down | microsomal glutathione S-transferase 2                               |
| 7950641 | KCTD14          | -2.2824385 | down | potassium channel tetramerisation domain containing 14               |
| 7990810 | MTHFS ST20      | -2.2882729 | down | 5,10-methenyltetrahydrofolate synthetase (5-formyltetra              |
| 8116910 | HIVEP1          | -2.2884958 | down | human immunodeficiency virus type I enhancer binding p               |
| 8163109 | C9orf4          | -2.2898967 | down | chromosome 9 open reading frame 4                                    |
| 8056151 | PLA2R1          | -2.292011  | down | phospholipase A2 receptor 1, 180kDa                                  |
| 7954065 | GPRC5A          | -2.2925377 | down | G protein-coupled receptor, family C, group 5, member A              |
| 8130720 | SFT2D1          | -2.2933786 | down | SFT2 domain containing 1                                             |
| 8112622 | GFM2            | -2.2997608 | down | G elongation factor, mitochondrial 2                                 |
| 7944656 | SC5DL           | -2.299896  | down | sterol-C5-desaturase (ERG3 delta-5-desaturase homolog, :             |
| 7989146 | MNS1            | -2.3032033 | down | meiosis-specific nuclear structural 1                                |
| 8161839 | C9orf95         | -2.3041525 | down | chromosome 9 open reading frame 95                                   |
| 8130556 | SOD2            | -2.3049014 | down | superoxide dismutase 2, mitochondrial                                |
| 8089659 | KIAA1407        | -2.3067951 | down |                                                                      |
| 7965855 | NUP37           | -2.3086555 | down | nucleoporin 37kDa                                                    |
| 7950654 | ALG8            | -2.3157907 | down | asparagine-linked glycosylation 8 homolog ( <i>S. cerevisiae</i> , : |
| 7979906 | C14orf112       | -2.3167827 | down | chromosome 14 open reading frame 112                                 |
| 7961026 | OVOS LOC728715  | -2.3178778 | down | ovostatin   similar to hCG38149                                      |
| 7962427 | PUS7L           | -2.318297  | down | pseudouridylate synthase 7 homolog ( <i>S. cerevisiae</i> )-like     |
| 7932118 | C10orf30        | -2.3199763 | down | chromosome 10 open reading frame 30                                  |
| 7933772 | ANK3            | -2.3200464 | down | ankyrin 3, node of Ranvier (ankyrin G)                               |
| 7916541 | DAB1            | -2.3233054 | down | disabled homolog 1 ( <i>Drosophila</i> )                             |
| 8161865 | PRUNE2 LOC10012 | -2.3235059 | down | prune homolog 2 ( <i>Drosophila</i> )   similar to KIAA0367          |
| 7926708 | THNSL1          | -2.3248072 | down | threonine synthase-like 1 ( <i>S. cerevisiae</i> )                   |
| 7954208 | PIK3C2G         | -2.3308823 | down | phosphoinositide-3-kinase, class 2, gamma polypeptide                |
| 7903239 | AGL             | -2.3319266 | down | amylo-1, 6-glucosidase, 4-alpha-glucanotransferase (glyco            |
| 8101916 | RG9MTD2         | -2.332441  | down | RNA (guanine-9-) methyltransferase domain containing 2               |
| 8078380 | LOC344787       | -2.3337526 | down | similar to zinc finger protein 813                                   |
| 8067295 | SLMO2           | -2.3350043 | down | slowmo homolog 2 ( <i>Drosophila</i> )                               |
| 8023401 | CCDC68          | -2.3368452 | down | coiled-coil domain containing 68                                     |

Supplemental Table 1a  
eMSC vs. eEP

|         |                  |            |      |                                                              |
|---------|------------------|------------|------|--------------------------------------------------------------|
| 7930148 | SFXN2            | -2.3389971 | down | sideroflexin 2                                               |
| 7953520 | LRRC23           | -2.3401802 | down | leucine rich repeat containing 23                            |
| 8046604 | AGPS             | -2.3404233 | down | alkylglycerone phosphate synthase                            |
| 8163775 | MEGF9            | -2.3408105 | down | multiple EGF-like-domains 9                                  |
| 7947138 | FANCF            | -2.340959  | down | Fanconi anemia, complementation group F                      |
| 8022666 | CHST9            | -2.3426325 | down | carbohydrate (N-acetylgalactosamine 4-0) sulfotransferas     |
| 8101757 | GPRIN3           | -2.3428771 | down | GPRIN family member 3                                        |
| 8089519 | BTLA             | -2.3437676 | down | B and T lymphocyte associated                                |
| 8146986 | HNF4G            | -2.34378   | down | hepatocyte nuclear factor 4, gamma                           |
| 8046380 | ITGA6            | -2.344376  | down | integrin, alpha 6                                            |
| 7988970 | KIAA1370         | -2.345848  | down |                                                              |
| 7979510 | SIX4             | -2.3481774 | down | SIX homeobox 4                                               |
| 7920472 | TPM3             | -2.348233  | down | tropomyosin 3                                                |
| 7932765 | MPP7             | -2.348747  | down | membrane protein, palmitoylated 7 (MAGUK p55 subfami         |
| 7903092 | FNBP1L           | -2.3489277 | down | formin binding protein 1-like                                |
| 7971191 | SUGT1L1 LOC1001: | -2.3499198 | down | SGT1, suppressor of G2 allele of SKP1 like 1 (S. cerevisiae) |
| 8142332 | IMMP2L           | -2.3502607 | down | IMP2 inner mitochondrial membrane peptidase-like (S. ce      |
| 8134407 | DLX6             | -2.350323  | down | distal-less homeobox 6                                       |
| 7970716 | LNX2             | -2.3505542 | down | ligand of numb-protein X 2                                   |
| 8171624 | GPR64            | -2.3612201 | down | G protein-coupled receptor 64                                |
| 8111019 | DNAH5            | -2.3616142 | down | dynein, axonemal, heavy chain 5                              |
| 8094789 | LIMCH1           | -2.36229   | down | LIM and calponin homology domains 1                          |
| 8038989 | ZNF600           | -2.3658218 | down | zinc finger protein 600                                      |
| 7913694 | FUCA1            | -2.3669293 | down | fucosidase, alpha-L- 1, tissue                               |
| 8120833 | SH3BGRL2         | -2.3680105 | down | SH3 domain binding glutamic acid-rich protein like 2         |
| 7934178 | PCBD1            | -2.3680453 | down | pterin-4 alpha-carbinolamine dehydratase/dimerization c      |
| 7957032 | YEATS4           | -2.3713777 | down | YEATS domain containing 4                                    |
| 8146115 | C8orf4           | -2.373936  | down | chromosome 8 open reading frame 4                            |
| 8120176 | C6orf141         | -2.37507   | down | chromosome 6 open reading frame 141                          |
| 8152812 | FAM84B           | -2.3759794 | down | family with sequence similarity 84, member B                 |
| 8043937 | C2orf29          | -2.381232  | down | chromosome 2 open reading frame 29                           |
| 8093839 | D4S234E          | -2.382046  | down | DNA segment on chromosome 4 (unique) 234 expressed s         |
| 8151296 | LACTB2           | -2.3832183 | down | lactamase, beta 2                                            |

Supplemental Table 1a  
eMSC vs. eEP

|         |                 |            |      |                                                                           |
|---------|-----------------|------------|------|---------------------------------------------------------------------------|
| 8117034 | GMPR            | -2.3850005 | down | guanosine monophosphate reductase                                         |
| 8042291 | AFTPH           | -2.3858922 | down | aftiphilin                                                                |
| 7928171 | SGPL1           | -2.3865306 | down | sphingosine-1-phosphate lyase 1                                           |
| 7915425 | ZMYND12         | -2.3868484 | down | zinc finger, MYND-type containing 12                                      |
| 7919780 | GOLPH3L         | -2.3916805 | down | golgi phosphoprotein 3-like                                               |
| 8179719 | POU5F1 POU5F1P1 | -2.397117  | down | POU class 5 homeobox 1   POU class 5 homeobox 1 pseudogene                |
| 7936419 | C10orf118       | -2.4012094 | down | chromosome 10 open reading frame 118                                      |
| 8043993 | UNQ9419         | -2.4024272 | down | AHPA9419                                                                  |
| 8027247 | ZNF93           | -2.4036605 | down | zinc finger protein 93                                                    |
| 8154416 | C9orf93         | -2.405098  | down | chromosome 9 open reading frame 93                                        |
| 8124889 | POU5F1 POU5F1P1 | -2.4053214 | down | POU class 5 homeobox 1   POU class 5 homeobox 1 pseudogene                |
| 7962579 | AMIGO2          | -2.407887  | down | adhesion molecule with Ig-like domain 2                                   |
| 8096489 | PDLIM5          | -2.4083598 | down | PDZ and LIM domain 5                                                      |
| 8118111 | HCP5            | -2.40997   | down | HLA complex P5                                                            |
| 8092552 | IGF2BP2         | -2.410234  | down | insulin-like growth factor 2 mRNA binding protein 2                       |
| 8020349 | ANKRD20B CCDC29 | -2.4115553 | down | ankyrin repeat domain 20B   coiled-coil domain containing 29              |
| 7927694 | PHYHIPL         | -2.4130378 | down | phytanoyl-CoA 2-hydroxylase interacting protein-like                      |
| 8127903 | KIAA1009        | -2.4131947 | down |                                                                           |
| 8117225 | GMNN            | -2.413587  | down | geminin, DNA replication inhibitor                                        |
| 8103877 | CLDN22          | -2.4153738 | down | claudin 22                                                                |
| 8122327 | CCDC28A         | -2.4181721 | down | coiled-coil domain containing 28A                                         |
| 8171297 | MID1            | -2.4204402 | down | midline 1 (Opitz/BBB syndrome)                                            |
| 8133062 | ZNF273          | -2.4229765 | down | zinc finger protein 273                                                   |
| 8121525 | KIAA1919        | -2.4233766 | down |                                                                           |
| 8022473 | ESCO1           | -2.4243498 | down | establishment of cohesion 1 homolog 1 ( <i>S. cerevisiae</i> )            |
| 8055361 | YSK4            | -2.4269302 | down | yeast Sps1/Ste20-related kinase 4 ( <i>S. cerevisiae</i> )                |
| 8002470 | HYDIN HYDIN2    | -2.4297926 | down | hydrocephalus inducing homolog (mouse)   hydrocephalus inducing homolog 2 |
| 7902965 | BTBD8           | -2.4384499 | down | BTB (POZ) domain containing 8                                             |
| 7961524 | ERP27           | -2.438521  | down | endoplasmic reticulum protein 27 kDa                                      |
| 8100292 | FRYL            | -2.4385884 | down | FRY-like                                                                  |
| 8096602 | DAPP1           | -2.4389577 | down | dual adaptor of phosphotyrosine and 3-phosphoinositides                   |
| 8154670 | IFT74           | -2.4390576 | down | intraflagellar transport 74 homolog ( <i>Chlamydomonas</i> )              |
| 8106210 | RGNEF           | -2.4429927 | down | Rho-guanine nucleotide exchange factor                                    |

Supplemental Table 1a  
eMSC vs. eEP

|         |                 |            |      |                                                               |
|---------|-----------------|------------|------|---------------------------------------------------------------|
| 8105663 | NLN             | -2.4442089 | down | neurolysin (metallopeptidase M3 family)                       |
| 7905929 | EFNA1           | -2.446645  | down | ephrin-A1                                                     |
| 8094719 | N4BP2           | -2.4502435 | down | NEDD4 binding protein 2                                       |
| 8084206 | B3GNT5          | -2.450478  | down | UDP-GlcNAc:betaGal beta-1,3-N-acetylglucosaminyltransf        |
| 8100984 | CXCL3           | -2.4515035 | down | chemokine (C-X-C motif) ligand 3                              |
| 7973918 | C14orf24        | -2.4516234 | down | chromosome 14 open reading frame 24                           |
| 8140620 | PCLO            | -2.4520679 | down | piccolo (presynaptic cytomatrix protein)                      |
| 7909866 | MOSC2           | -2.452234  | down | MOCO sulphurase C-terminal domain containing 2                |
| 7938816 | ZDHC13          | -2.4527752 | down | zinc finger, DHC-type containing 13                           |
| 8030908 | ZNF480          | -2.45298   | down | zinc finger protein 480                                       |
| 8022176 | LAMA1           | -2.4531386 | down | laminin, alpha 1                                              |
| 8094361 | GBA3            | -2.4538372 | down | glucosidase, beta, acid 3 (cytosolic)                         |
| 8089743 | B4GALT4         | -2.4570904 | down | UDP-Gal:betaGlcNAc beta 1,4- galactosyltransferase, poly      |
| 8146427 | PCMTD1 LOC10012 | -2.4596994 | down | protein-L-isoaspartate (D-aspartate) O-methyltransferase      |
| 8173551 | PHKA1           | -2.4602025 | down | phosphorylase kinase, alpha 1 (muscle)                        |
| 8133057 | ZNF138          | -2.4661875 | down | zinc finger protein 138                                       |
| 8088526 | THOC7           | -2.4663167 | down | THO complex 7 homolog (Drosophila)                            |
| 7953765 | FAM80B          | -2.470938  | down | family with sequence similarity 80, member B                  |
| 8113796 | FLJ44606        | -2.4719565 | down | hypothetical gene supported by AK126569                       |
| 7964745 | TMBIM4 LOC10013 | -2.4729125 | down | transmembrane BAX inhibitor motif containing 4   hypoth       |
| 7950042 | SHANK2          | -2.477467  | down | SH3 and multiple ankyrin repeat domains 2                     |
| 8096617 | BANK1           | -2.4801269 | down | B-cell scaffold protein with ankyrin repeats 1                |
| 7934898 | ANKRD22         | -2.4818478 | down | ankyrin repeat domain 22                                      |
| 8001507 | BBS2            | -2.482159  | down | Bardet-Biedl syndrome 2                                       |
| 8157632 | C9orf18         | -2.4836075 | down | chromosome 9 open reading frame 18                            |
| 8127425 | LMBRD1          | -2.4882965 | down | LMBR1 domain containing 1                                     |
| 8104930 | SLC1A3          | -2.4894161 | down | solute carrier family 1 (glial high affinity glutamate transp |
| 8000013 | EXOD1 DCUN1D3   | -2.4895818 | down | exonuclease domain containing 1   DCN1, defective in cul      |
| 8020384 | KIAA1772        | -2.4899232 | down |                                                               |
| 7927082 | HSD17B7P2       | -2.4909043 | down | hydroxysteroid (17-beta) dehydrogenase 7 pseudogene 2         |
| 8018761 | ST6GALNAC2      | -2.4909506 | down | ST6 (alpha-N-acetyl-neuraminy-2,3-beta-galactosyl-1,3)-N      |
| 7993898 | VWA3A           | -2.4926913 | down | von Willebrand factor A domain containing 3A                  |
| 7934411 | USP54           | -2.494258  | down | ubiquitin specific peptidase 54                               |

Supplemental Table 1a  
eMSC vs. eEP

|         |                 |            |      |                                                             |
|---------|-----------------|------------|------|-------------------------------------------------------------|
| 7962516 | SLC38A1         | -2.4968648 | down | solute carrier family 38, member 1                          |
| 8090823 | SLCO2A1         | -2.4975598 | down | solute carrier organic anion transporter family, member 2   |
| 8105267 | ITGA2           | -2.4992602 | down | integrin, alpha 2 (CD49B, alpha 2 subunit of VLA-2 receptc  |
| 8004889 | WDR16           | -2.5033834 | down | WD repeat domain 16                                         |
| 8175052 | AIFM1           | -2.5051515 | down | apoptosis-inducing factor, mitochondrion-associated, 1      |
| 7983811 | PIGB            | -2.5072641 | down | phosphatidylinositol glycan anchor biosynthesis, class B    |
| 8107119 | TMEM157         | -2.5108583 | down | transmembrane protein 157                                   |
| 7931930 | PRKCQ           | -2.511095  | down | protein kinase C, theta                                     |
| 8176955 | SPRY3           | -2.513276  | down | sprouty homolog 3 (Drosophila)                              |
| 8147970 | EBAG9           | -2.5154908 | down | estrogen receptor binding site associated, antigen, 9       |
| 8171034 | SPRY3           | -2.5175145 | down | sprouty homolog 3 (Drosophila)                              |
| 7956826 | TBC1D30         | -2.518193  | down | TBC1 domain family, member 30                               |
| 8151471 | MRPS28 TPD52    | -2.5199263 | down | mitochondrial ribosomal protein S28   tumor protein D52     |
| 7906904 | HSD17B7 HSD17B7 | -2.520187  | down | hydroxysteroid (17-beta) dehydrogenase 7   hydroxysterc     |
| 8159900 | GLIS3           | -2.5223453 | down | GLIS family zinc finger 3                                   |
| 8135211 | MGC35361        | -2.5229971 | down |                                                             |
| 8089606 | WDR52           | -2.5255527 | down | WD repeat domain 52                                         |
| 8114326 | C5orf5          | -2.5264041 | down | chromosome 5 open reading frame 5                           |
| 7937696 | LOC338651       | -2.531643  | down |                                                             |
| 8105862 | CDK7            | -2.5333939 | down | cyclin-dependent kinase 7                                   |
| 7958211 | C12orf45        | -2.5345538 | down | chromosome 12 open reading frame 45                         |
| 8022927 | SLC39A6         | -2.5388863 | down | solute carrier family 39 (zinc transporter), member 6       |
| 8034084 | AP1M2           | -2.5404027 | down | adaptor-related protein complex 1, mu 2 subunit             |
| 8177462 | CDK7            | -2.5420153 | down | cyclin-dependent kinase 7                                   |
| 8085062 | IL5RA           | -2.5423226 | down | interleukin 5 receptor, alpha                               |
| 8131452 | RSPH10B LOC7281 | -2.5434184 | down | radial spoke head 10 homolog B (Chlamydomonas)   radi       |
| 7932744 | ARMC4           | -2.5493662 | down | armadillo repeat containing 4                               |
| 8089596 | WDR52           | -2.5536642 | down | WD repeat domain 52                                         |
| 7979725 | PIGH            | -2.5577893 | down | phosphatidylinositol glycan anchor biosynthesis, class H    |
| 8075709 | APOL4           | -2.5579014 | down | apolipoprotein L, 4                                         |
| 8076612 | EFCAB6          | -2.5596855 | down | EF-hand calcium binding domain 6                            |
| 8171418 | PIGA            | -2.5671897 | down | phosphatidylinositol glycan anchor biosynthesis, class A (p |
| 8120783 | MYO6            | -2.5688682 | down | myosin VI                                                   |

Supplemental Table 1a  
eMSC vs. eEP

|         |               |            |      |                                                            |
|---------|---------------|------------|------|------------------------------------------------------------|
| 8044391 | MERTK         | -2.570091  | down | c-mer proto-oncogene tyrosine kinase                       |
| 7947947 | AGBL2         | -2.5705411 | down | ATP/GTP binding protein-like 2                             |
| 7970602 | PARP4         | -2.5727532 | down | poly (ADP-ribose) polymerase family, member 4              |
| 8162586 | SLC35D2       | -2.5729609 | down | solute carrier family 35, member D2                        |
| 7947322 | DCDC1 DCDC5   | -2.576207  | down | doublecortin domain containing 1   doublecortin domain     |
| 8145611 | FZD3          | -2.5769346 | down | frizzled homolog 3 (Drosophila)                            |
| 7934133 | PPA1          | -2.579838  | down | pyrophosphatase (inorganic) 1                              |
| 8143341 | JHDM1D        | -2.5806944 | down | jumonji C domain containing histone demethylase 1 homc     |
| 8167287 | PORCN         | -2.5817735 | down | porcupine homolog (Drosophila)                             |
| 8146517 | CHCHD7        | -2.582073  | down | coiled-coil-helix-coiled-coil-helix domain containing 7    |
| 7989055 | DYX1C1        | -2.5873404 | down | dyslexia susceptibility 1 candidate 1                      |
| 8144669 | FDFT1         | -2.5881126 | down | farnesyl-diphosphate farnesyltransferase 1                 |
| 8171823 | APOO          | -2.59156   | down | apolipoprotein O                                           |
| 8066530 | SPINT3        | -2.5935462 | down | serine peptidase inhibitor, Kunitz type, 3                 |
| 8116848 | PAK1IP1       | -2.5959651 | down | PAK1 interacting protein 1                                 |
| 8019831 | CLUL1         | -2.5966518 | down | clusterin-like 1 (retinal)                                 |
| 8127087 | GSTA3         | -2.5975363 | down | glutathione S-transferase A3                               |
| 7957514 | PLEKHG7       | -2.6051557 | down | pleckstrin homology domain containing, family G (with Rh   |
| 8131881 | C7orf46       | -2.6085994 | down | chromosome 7 open reading frame 46                         |
| 8146794 | DEPDC2        | -2.6090229 | down | DEP domain containing 2                                    |
| 8124562 | ZNF323        | -2.6107335 | down | zinc finger protein 323                                    |
| 8143961 | PRKAG2        | -2.6116707 | down | protein kinase, AMP-activated, gamma 2 non-catalytic sub   |
| 8012918 | CDRT4 FAM18B2 | -2.6251476 | down | CMT1A duplicated region transcript 4   family with sequen  |
| 8047161 | OBFC2A        | -2.6254086 | down | oligonucleotide/oligosaccharide-binding fold containing 2. |
| 8174201 | BEX1          | -2.6262953 | down | brain expressed, X-linked 1                                |
| 8017843 | SLC16A6       | -2.6289716 | down | solute carrier family 16, member 6 (monocarboxylic acid t  |
| 7940775 | RARRES3       | -2.6303475 | down | retinoic acid receptor responder (tazarotene induced) 3    |
| 7905428 | TUFT1         | -2.6387582 | down | tuftelin 1                                                 |
| 8102249 | AGXT2L1       | -2.643003  | down | alanine-glyoxylate aminotransferase 2-like 1               |
| 8116402 | MAPK9         | -2.6444504 | down | mitogen-activated protein kinase 9                         |
| 8162147 | ZCCHC6        | -2.6447313 | down | zinc finger, CCHC domain containing 6                      |
| 7954460 | LYRM5         | -2.646394  | down | LYR motif containing 5                                     |
| 8095697 | CXCL1         | -2.651633  | down | chemokine (C-X-C motif) ligand 1 (melanoma growth stim     |

Supplemental Table 1a  
eMSC vs. eEP

|         |                 |            |      |                                                               |
|---------|-----------------|------------|------|---------------------------------------------------------------|
| 8017061 | TEX14           | -2.6532483 | down | testis expressed 14                                           |
| 7951207 | TMEM123         | -2.6535351 | down | transmembrane protein 123                                     |
| 8078397 | CMTM8           | -2.6564088 | down | CKLF-like MARVEL transmembrane domain containing 8            |
| 8059350 | AP1S3           | -2.6586752 | down | adaptor-related protein complex 1, sigma 3 subunit            |
| 8122317 | HEBP2           | -2.6593654 | down | heme binding protein 2                                        |
| 8020702 | TAF4B           | -2.6597228 | down | TAF4b RNA polymerase II, TATA box binding protein (TBP)       |
| 8162502 | FBP1            | -2.662797  | down | fructose-1,6-bisphosphatase 1                                 |
| 8016468 | HOXB7           | -2.6648707 | down | homeobox B7                                                   |
| 8169352 | NXT2            | -2.6654456 | down | nuclear transport factor 2-like export factor 2               |
| 8117189 | KAAG1           | -2.665468  | down | kidney associated antigen 1                                   |
| 8138009 | RSPH10B LOC7281 | -2.666645  | down | radial spoke head 10 homolog B (Chlamydomonas)   radial       |
| 7912157 | ERRFI1          | -2.6700523 | down | ERBB receptor feedback inhibitor 1                            |
| 7901915 | ALG6            | -2.6735015 | down | asparagine-linked glycosylation 6 homolog (S. cerevisiae, ;   |
| 8133961 | RUNDC3B         | -2.6761448 | down | RUN domain containing 3B                                      |
| 8120679 | DDX43           | -2.6779547 | down | DEAD (Asp-Glu-Ala-Asp) box polypeptide 43                     |
| 7997556 | LRRC50          | -2.6885993 | down | leucine rich repeat containing 50                             |
| 7990757 | CTSH            | -2.7026978 | down | cathepsin H                                                   |
| 8124897 | PSORS1C3 LOC100 | -2.705114  | down | psoriasis susceptibility 1 candidate 3   similar to psoriasis |
| 8094520 | PCDH7           | -2.70603   | down | protocadherin 7                                               |
| 8174527 | CAPN6           | -2.7109702 | down | calpain 6                                                     |
| 8146225 | C8orf40         | -2.7141528 | down | chromosome 8 open reading frame 40                            |
| 8091678 | VEPH1           | -2.7148342 | down | ventricular zone expressed PH domain homolog 1 (zebrafi       |
| 7947282 | DCDC5           | -2.7172484 | down | doublecortin domain containing 5                              |
| 8154892 | DNAI1           | -2.718631  | down | dynein, axonemal, intermediate chain 1                        |
| 8098041 | TMEM144         | -2.7206244 | down | transmembrane protein 144                                     |
| 8091009 | PIK3CB          | -2.721509  | down | phosphoinositide-3-kinase, catalytic, beta polypeptide        |
| 7919326 | ACP6            | -2.7227533 | down | acid phosphatase 6, lysophosphatidic                          |
| 7979085 | PYGL            | -2.7235904 | down | phosphorylase, glycogen; liver (Hers disease, glycogen sto    |
| 8152962 | LRRC6           | -2.727641  | down | leucine rich repeat containing 6                              |
| 7971757 | NEK5            | -2.729868  | down | NIMA (never in mitosis gene a)-related kinase 5               |
| 7951485 | SLC35F2         | -2.7320383 | down | solute carrier family 35, member F2                           |
| 8092328 | MCCC1           | -2.7360299 | down | methylcrotonoyl-Coenzyme A carboxylase 1 (alpha)              |
| 8179727 | PSORS1C3 LOC100 | -2.7406805 | down | psoriasis susceptibility 1 candidate 3   similar to psoriasis |



Supplemental Table 1a  
eMSC vs. eEP

|         |              |            |      |                                                                 |
|---------|--------------|------------|------|-----------------------------------------------------------------|
| 8147112 | CA13         | -2.7419086 | down | carbonic anhydrase XIII                                         |
| 7968883 | C13orf31     | -2.7422066 | down | chromosome 13 open reading frame 31                             |
| 8018774 | ST6GALNAC1   | -2.7435436 | down | ST6 (alpha-N-acetyl-neuraminy-2,3-beta-galactosyl-1,3)-N        |
| 8135576 | TES          | -2.7455409 | down | testis derived transcript (3 LIM domains)                       |
| 8123884 | C6orf52      | -2.7455623 | down | chromosome 6 open reading frame 52                              |
| 8157446 | ORM1         | -2.746588  | down | orosomuroid 1                                                   |
| 7918768 | DENND2C      | -2.7524877 | down | DENN/MADD domain containing 2C                                  |
| 7970448 | GJB6         | -2.7533655 | down | gap junction protein, beta 6, 30kDa                             |
| 8107133 | PAM          | -2.7558734 | down | peptidylglycine alpha-amidating monooxygenase                   |
| 8058552 | IDH1         | -2.756597  | down | isocitrate dehydrogenase 1 (NADP+), soluble                     |
| 8100362 | LNX1         | -2.757501  | down | ligand of numb-protein X 1                                      |
| 8081431 | ALCAM        | -2.760066  | down | activated leukocyte cell adhesion molecule                      |
| 7903334 | CDC14A       | -2.761189  | down | CDC14 cell division cycle 14 homolog A ( <i>S. cerevisiae</i> ) |
| 7974799 | MNAT1        | -2.7635052 | down | menage a trois homolog 1, cyclin H assembly factor (Xeno        |
| 8066786 | ZMYND8       | -2.7656498 | down | zinc finger, MYND-type containing 8                             |
| 8021301 | RAB27B       | -2.7660303 | down |                                                                 |
| 8066402 | C20orf111    | -2.7703016 | down | chromosome 20 open reading frame 111                            |
| 8096733 | SGMS2        | -2.7742803 | down | sphingomyelin synthase 2                                        |
| 7956120 | ERBB3        | -2.7757046 | down | v-erb-b2 erythroblastic leukemia viral oncogene homolog         |
| 8079598 | ZNF589       | -2.7781968 | down | zinc finger protein 589                                         |
| 8126784 | PLA2G7       | -2.7793026 | down | phospholipase A2, group VII (platelet-activating factor ace     |
| 7910591 | C1orf57      | -2.7801127 | down | chromosome 1 open reading frame 57                              |
| 8129558 | OR2A4 OR2A7  | -2.7812924 | down | olfactory receptor, family 2, subfamily A, member 4   olfa      |
| 8146839 | C8orf34      | -2.7822862 | down | chromosome 8 open reading frame 34                              |
| 8002446 | HYDIN HYDIN2 | -2.7862165 | down | hydrocephalus inducing homolog (mouse)   hydrocephalu           |
| 8097903 | TLR2         | -2.7929125 | down | toll-like receptor 2                                            |
| 7931108 | DMBT1        | -2.7932496 | down | deleted in malignant brain tumors 1                             |
| 8103834 | AGA          | -2.7939377 | down | aspartylglucosaminidase                                         |
| 8104492 | ROPN1L       | -2.7942894 | down | ropporin 1-like                                                 |
| 8066117 | SAMHD1       | -2.7943268 | down | SAM domain and HD domain 1                                      |
| 8040672 | C2orf39      | -2.796457  | down | chromosome 2 open reading frame 39                              |
| 7957417 | TMTC2        | -2.7964737 | down | transmembrane and tetratricopeptide repeat containing 2         |
| 7925929 | AKR1C3       | -2.797386  | down | aldo-keto reductase family 1, member C3 (3-alpha hydrox         |

Supplemental Table 1a  
eMSC vs. eEP

|         |                          |            |      |                                                                                                           |
|---------|--------------------------|------------|------|-----------------------------------------------------------------------------------------------------------|
| 8054740 | PAX8                     | -2.7989693 | down | paired box 8                                                                                              |
| 8091120 | GK5                      | -2.7997243 | down | glycerol kinase 5 (putative)                                                                              |
| 8100026 | ATP8A1                   | -2.8015811 | down | ATPase, aminophospholipid transporter (APLT), class I, type 8                                             |
| 8095834 | SHROOM3                  | -2.8022447 | down | shroom family member 3                                                                                    |
| 8155460 | CNTNAP3 CNTNAP3          | -2.80335   | down | contactin associated protein-like 3   contactin associated protein-like 3                                 |
| 8103106 | LRBA                     | -2.8070893 | down | LPS-responsive vesicle trafficking, beach and anchor containing protein                                   |
| 8061138 | CSRP2BP                  | -2.8113704 | down | CSRP2 binding protein                                                                                     |
| 8121015 | C6orf165 SLC35A1         | -2.812975  | down | chromosome 6 open reading frame 165   solute carrier family 35 member 1                                   |
| 8061305 | C20orf19                 | -2.8133519 | down | chromosome 20 open reading frame 19                                                                       |
| 7985398 | FAM154B                  | -2.813426  | down | family with sequence similarity 154, member B                                                             |
| 8161288 | CNTNAP3 CNTNAP3          | -2.8167098 | down | contactin associated protein-like 3   contactin associated protein-like 3                                 |
| 8127502 | C6orf155                 | -2.8186145 | down | chromosome 6 open reading frame 155                                                                       |
| 7975676 | C14orf45                 | -2.8313494 | down | chromosome 14 open reading frame 45                                                                       |
| 7975459 | SIPA1L1                  | -2.8321774 | down | signal-induced proliferation-associated 1 like 1                                                          |
| 7961829 | BCAT1                    | -2.8334572 | down | branched chain aminotransferase 1, cytosolic                                                              |
| 8066513 | SDC4                     | -2.8337727 | down | syndecan 4                                                                                                |
| 7983393 | SORD                     | -2.8369505 | down | sorbitol dehydrogenase                                                                                    |
| 8044212 | SULT1C2                  | -2.8389554 | down | sulfotransferase family, cytosolic, 1C, member 2                                                          |
| 7983512 | SQRDL                    | -2.8405907 | down | sulfide quinone reductase-like (yeast)                                                                    |
| 8088602 | MAGI1                    | -2.840682  | down | membrane associated guanylate kinase, WW and PDZ domain containing 1                                      |
| 7903407 | AMY2B                    | -2.841501  | down | amylase, alpha 2B (pancreatic)                                                                            |
| 7960919 | MFAP5                    | -2.8455546 | down | microfibrillar associated protein 5                                                                       |
| 8104856 | SPEF2 LOC100134025       | -2.8554142 | down | sperm flagellar 2   hypothetical protein LOC100134025                                                     |
| 8168691 | DIAPH2                   | -2.8568203 | down | diaphanous homolog 2 (Drosophila)                                                                         |
| 7942941 | CCDC81                   | -2.859064  | down | coiled-coil domain containing 81                                                                          |
| 8045882 | DAPL1                    | -2.8603559 | down | death associated protein-like 1                                                                           |
| 8143633 | OR2A7 OR2A4 LOC100134025 | -2.8613842 | down | olfactory receptor, family 2, subfamily A, member 7   olfactory receptor, family 2, subfamily A, member 7 |
| 8097449 | PCDH10                   | -2.8629854 | down | protocadherin 10                                                                                          |
| 7920285 | S100A2                   | -2.865523  | down | S100 calcium binding protein A2                                                                           |
| 8005626 | SNORA59A SNORA59A        | -2.8656669 | down | small nucleolar RNA, H/ACA box 59A   small nucleolar RNA, H/ACA box 59A                                   |
| 7957673 | C12orf55 FLJ34470        | -2.8663    | down | chromosome 12 open reading frame 55   hypothetical protein FLJ34470                                       |
| 7897953 | SNORA59A SNORA59A        | -2.8690777 | down | small nucleolar RNA, H/ACA box 59A   small nucleolar RNA, H/ACA box 59A                                   |
| 8154100 | VLDLR                    | -2.870537  | down | very low density lipoprotein receptor                                                                     |

Supplemental Table 1a  
eMSC vs. eEP

|         |                  |            |      |                                                          |
|---------|------------------|------------|------|----------------------------------------------------------|
| 7933437 | PTPN20B PTPN20A  | -2.8725526 | down | protein tyrosine phosphatase, non-receptor type 20B   pr |
| 8065280 | C20orf74         | -2.8731444 | down | chromosome 20 open reading frame 74                      |
| 8162117 | GOLM1            | -2.875464  | down | golgi membrane protein 1                                 |
| 8160637 | B4GALT1          | -2.878751  | down | UDP-Gal:betaGlcNAc beta 1,4- galactosyltransferase, poly |
| 8160138 | NFIB             | -2.8801398 | down | nuclear factor I/B                                       |
| 7954527 | ARNTL2           | -2.8841496 | down | aryl hydrocarbon receptor nuclear translocator-like 2    |
| 8017704 | FLJ32065         | -2.886613  | down |                                                          |
| 8138363 | SOSTDC1          | -2.8880365 | down | sclerostin domain containing 1                           |
| 8035779 | LOC100128975     | -2.88905   | down | similar to Zinc finger protein 626                       |
| 7964927 | TSPAN8           | -2.8938043 | down | tetraspanin 8                                            |
| 8052940 | PAIP2B           | -2.8969932 | down | poly(A) binding protein interacting protein 2B           |
| 7918517 | WDR77            | -2.8970082 | down | WD repeat domain 77                                      |
| 7903162 | TMEM56           | -2.897959  | down | transmembrane protein 56                                 |
| 7987145 | FMN1             | -2.9053535 | down | formin 1                                                 |
| 7938364 | WEE1             | -2.9122791 | down |                                                          |
| 8126905 | CRISP3           | -2.9211252 | down | cysteine-rich secretory protein 3                        |
| 8138258 | FLJ14712         | -2.9233375 | down |                                                          |
| 7917338 | BCL10            | -2.9268785 | down | B-cell CLL/lymphoma 10                                   |
| 8130422 | CNKSR3           | -2.9302466 | down | CNKSR family member 3                                    |
| 8136987 | ARHGEF5 LOC7283  | -2.931442  | down | Rho guanine nucleotide exchange factor (GEF) 5   similar |
| 8142646 | IQUB             | -2.933978  | down | IQ motif and ubiquitin domain containing                 |
| 8085732 | EFHB             | -2.9344146 | down | EF-hand domain family, member B                          |
| 7969640 | CLDN10           | -2.9361067 | down | claudin 10                                               |
| 7974080 | MIA2             | -2.9380777 | down | melanoma inhibitory activity 2                           |
| 8045860 | PKP4             | -2.9432797 | down | plakophilin 4                                            |
| 8095907 | FRAS1            | -2.948348  | down | Fraser syndrome 1                                        |
| 8111941 | HMGCS1           | -2.9497216 | down | 3-hydroxy-3-methylglutaryl-Coenzyme A synthase 1 (solu   |
| 7936463 | ABLIM1           | -2.9570463 | down | actin binding LIM protein 1                              |
| 8147156 | WWP1             | -2.9586906 | down | WW domain containing E3 ubiquitin protein ligase 1       |
| 8099467 | FGFBP1           | -2.9602487 | down | fibroblast growth factor binding protein 1               |
| 8035773 | ZNF506           | -2.9606388 | down | zinc finger protein 506                                  |
| 8098620 | FAM149A          | -2.9620457 | down | family with sequence similarity 149, member A            |
| 8095819 | STBD1 LOC100129! | -2.9633133 | down | starch binding domain 1   similar to genethonin 1        |

Supplemental Table 1a  
eMSC vs. eEP

|         |          |            |      |                                                           |
|---------|----------|------------|------|-----------------------------------------------------------|
| 8122265 | TNFAIP3  | -2.9635043 | down | tumor necrosis factor, alpha-induced protein 3            |
| 7959102 | HSPB8    | -2.9712865 | down | heat shock 22kDa protein 8                                |
| 8006531 | SLFN5    | -2.9731348 | down | schlafen family member 5                                  |
| 8123893 | MAK      | -2.9733934 | down | male germ cell-associated kinase                          |
| 7958253 | OCC-1    | -2.9779656 | down | overexpressed in colon carcinoma-1                        |
| 8131479 | FLJ20323 | -2.9796736 | down |                                                           |
| 7924055 | C1orf74  | -2.9821372 | down | chromosome 1 open reading frame 74                        |
| 8058627 | ERBB4    | -2.9864533 | down | v-erb-a erythroblastic leukemia viral oncogene homolog 4  |
| 8080487 | PRKCD    | -2.997948  | down | protein kinase C, delta                                   |
| 8082003 | EAF2     | -2.9989026 | down | ELL associated factor 2                                   |
| 8020468 | RBBP8    | -3.0012808 | down | retinoblastoma binding protein 8                          |
| 8035980 | RHPN2    | -3.0019374 | down | rhophilin, Rho GTPase binding protein 2                   |
| 8045835 | GALNT5   | -3.0046685 | down | UDP-N-acetyl-alpha-D-galactosamine:polypeptide N-acety    |
| 8081890 | PLA1A    | -3.009719  | down | phospholipase A1 member A                                 |
| 8125149 | SLC44A4  | -3.010626  | down | solute carrier family 44, member 4                        |
| 8123080 | SYTL3    | -3.012651  | down | synaptotagmin-like 3                                      |
| 8162652 | CTSL2    | -3.0135057 | down | cathepsin L2                                              |
| 7912347 | CASZ1    | -3.0146031 | down | castor zinc finger 1                                      |
| 8178653 | SLC44A4  | -3.0177205 | down | solute carrier family 44, member 4                        |
| 8039025 | ZNF702   | -3.019107  | down | zinc finger protein 702                                   |
| 8003060 | HSPC105  | -3.0245693 | down | NAD(P) dependent steroid dehydrogenase-like               |
| 8112053 | CDC20B   | -3.0249846 | down | cell division cycle 20 homolog B ( <i>S. cerevisiae</i> ) |
| 8179861 | SLC44A4  | -3.02573   | down | solute carrier family 44, member 4                        |
| 8018038 | ABCA5    | -3.0307858 | down | ATP-binding cassette, sub-family A (ABC1), member 5       |
| 7930593 | C10orf81 | -3.0334198 | down | chromosome 10 open reading frame 81                       |
| 8084627 | C3orf65  | -3.0381594 | down | chromosome 3 open reading frame 65                        |
| 8111506 | CAPSL    | -3.0392563 | down | calcyphosine-like                                         |
| 7957688 | C12orf63 | -3.0432699 | down | chromosome 12 open reading frame 63                       |
| 7902518 | GIPC2    | -3.0477827 | down | GIPC PDZ domain containing family, member 2               |
| 8170364 | AFF2     | -3.0482082 | down | AF4/FMR2 family, member 2                                 |
| 8082643 | NEK11    | -3.0507123 | down | NIMA (never in mitosis gene a)- related kinase 11         |
| 8043055 | DNAH6    | -3.0515625 | down | dynein, axonemal, heavy chain 6                           |
| 8021453 | SEC11C   | -3.052112  | down | SEC11 homolog C ( <i>S. cerevisiae</i> )                  |

Supplemental Table 1a  
eMSC vs. eEP

|         |                  |            |      |                                                           |
|---------|------------------|------------|------|-----------------------------------------------------------|
| 8045857 | LOC554201        | -3.0531921 | down |                                                           |
| 8065607 | PLAGL2           | -3.0586207 | down | pleiomorphic adenoma gene-like 2                          |
| 8002492 | HYDIN   HYDIN2   | -3.0641012 | down | hydrocephalus inducing homolog (mouse)   hydrocephalu     |
| 8130408 | PIP3-E           | -3.0657783 | down |                                                           |
| 7981460 | PPP1R13B         | -3.0760708 | down | protein phosphatase 1, regulatory (inhibitor) subunit 13B |
| 8113761 | ZNF608           | -3.07981   | down | zinc finger protein 608                                   |
| 7944869 | SPA17            | -3.0844932 | down | sperm autoantigenic protein 17                            |
| 7997374 | DYNLRB2          | -3.0868294 | down | dynein, light chain, roadblock-type 2                     |
| 7929816 | SCD              | -3.0915298 | down | stearoyl-CoA desaturase (delta-9-desaturase)              |
| 8080714 | FLNB             | -3.099427  | down | filamin B, beta (actin binding protein 278)               |
| 8122827 | C6orf97          | -3.1020534 | down | chromosome 6 open reading frame 97                        |
| 8077270 | CHL1             | -3.1066425 | down | cell adhesion molecule with homology to L1CAM (close ho   |
| 7934570 | KCNMA1           | -3.1085713 | down | potassium large conductance calcium-activated channel, s  |
| 8034390 | ZNF799           | -3.1225677 | down | zinc finger protein 799                                   |
| 7976578 | AK7              | -3.1284347 | down | adenylate kinase 7                                        |
| 8175574 | SLITRK4          | -3.1326091 | down | SLIT and NTRK-like family, member 4                       |
| 8124134 | TPMT             | -3.1379354 | down | thiopurine S-methyltransferase                            |
| 8097801 | LOC729830        | -3.1407554 | down | similar to CG3558-PA, isoform A                           |
| 7951672 | PIH1D2           | -3.1427965 | down | PIH1 domain containing 2                                  |
| 8135661 | CFTR             | -3.1438494 | down | cystic fibrosis transmembrane conductance regulator (ATI  |
| 8021376 | NEDD4L           | -3.144104  | down | neural precursor cell expressed, developmentally down-re  |
| 7975632 | ZADH1            | -3.1530766 | down | zinc binding alcohol dehydrogenase, domain containing 1   |
| 8180078 | HLA-DMB          | -3.1595814 | down | major histocompatibility complex, class II, DM beta       |
| 8041561 | MORN2            | -3.1680052 | down | MORN repeat containing 2                                  |
| 7903281 | SLC35A3          | -3.173934  | down | solute carrier family 35 (UDP-N-acetylglucosamine (UDP-C  |
| 8014591 | HNF1B            | -3.1759598 | down | HNF1 homeobox B                                           |
| 8060895 | RNU105B          | -3.1771545 | down | RNA, U105B small nucleolar                                |
| 8043835 | C2orf15   MRPL30 | -3.1779413 | down | chromosome 2 open reading frame 15   mitochondrial rib    |
| 8156160 | LOC100129901     | -3.1787758 | down | similar to KIF27B                                         |
| 8139859 | GUSB             | -3.1804917 | down | glucuronidase, beta                                       |
| 7988414 | GATM             | -3.215281  | down | glycine amidinotransferase (L-arginine:glycine amidinotra |
| 7983157 | TMEM62           | -3.2206168 | down | transmembrane protein 62                                  |
| 8166690 | CXorf59          | -3.2240381 | down | chromosome X open reading frame 59                        |

Supplemental Table 1a  
eMSC vs. eEP

|         |                  |            |      |                                                              |
|---------|------------------|------------|------|--------------------------------------------------------------|
| 8128795 | C6orf199         | -3.2289455 | down | chromosome 6 open reading frame 199                          |
| 8066542 | SPINLW1 WFDC6    | -3.23006   | down | serine peptidase inhibitor-like, with Kunitz and WAP domains |
| 7916789 | WDR78            | -3.2397056 | down | WD repeat domain 78                                          |
| 8150691 | EFCAB1           | -3.2400863 | down | EF-hand calcium binding domain 1                             |
| 7909455 | TRAF3IP3 LOC1001 | -3.2402422 | down | TRAF3 interacting protein 3   hypothetical protein LOC1001   |
| 8144758 | ZDHHC2           | -3.240751  | down | zinc finger, DHHC-type containing 2                          |
| 7975268 | ARG2             | -3.2424545 | down | arginase, type II                                            |
| 7938880 | HTATIP2          | -3.2450178 | down | HIV-1 Tat interactive protein 2, 30kDa                       |
| 8048864 | CCL20            | -3.2495148 | down | chemokine (C-C motif) ligand 20                              |
| 8014891 | IKZF3            | -3.2522275 | down | IKAROS family zinc finger 3 (Aiolos)                         |
| 7932407 | ST8SIA6          | -3.255644  | down | ST8 alpha-N-acetyl-neuraminide alpha-2,8-sialyltransferase   |
| 7951165 | PGR              | -3.2559552 | down | progesterone receptor                                        |
| 8143766 | ARP11            | -3.2581067 | down | actin-related Arp11                                          |
| 8080926 | ARL6IP5          | -3.2603688 | down | ADP-ribosylation-like factor 6 interacting protein 5         |
| 8135585 | LOC100128868     | -3.2617717 | down | testin-related protein TRG                                   |
| 8143610 | FLJ43692 LOC7283 | -3.2699845 | down | ARHGEF5-like   similar to rho guanine nucleotide exchange    |
| 7964759 | GRIP1            | -3.275805  | down | glutamate receptor interacting protein 1                     |
| 8058462 | MDH1B            | -3.2774704 | down | malate dehydrogenase 1B, NAD (soluble)                       |
| 7931977 | ITIH5            | -3.282138  | down | inter-alpha (globulin) inhibitor H5                          |
| 8171435 | PIR              | -3.2863543 | down | pirin (iron-binding nuclear protein)                         |
| 8172225 | EFHC2            | -3.2892792 | down | EF-hand domain (C-terminal) containing 2                     |
| 7917954 | FRRS1            | -3.2966754 | down | ferric-chelate reductase 1                                   |
| 8154823 | ANKRD18B         | -3.3053818 | down | ankyrin repeat domain 18B                                    |
| 7944751 | C11orf63         | -3.3082159 | down | chromosome 11 open reading frame 63                          |
| 7974542 | C14orf101        | -3.3158112 | down | chromosome 14 open reading frame 101                         |
| 8046759 | DNAJC10          | -3.3165805 | down | DnaJ (Hsp40) homolog, subfamily C, member 10                 |
| 7980098 | ALDH6A1          | -3.3168252 | down | aldehyde dehydrogenase 6 family, member A1                   |
| 7950578 | PAK1             | -3.3236685 | down | p21/Cdc42/Rac1-activated kinase 1 (STE20 homolog, yeast)     |
| 8125530 | HLA-DMB          | -3.3248403 | down | major histocompatibility complex, class II, DM beta          |
| 7917503 | GBP3             | -3.3253586 | down | guanylate binding protein 3                                  |
| 8129837 | IL20RA           | -3.3318198 | down | interleukin 20 receptor, alpha                               |
| 8131803 | IL6              | -3.3413908 | down | interleukin 6 (interferon, beta 2)                           |
| 8102362 | TIFA             | -3.3431907 | down | TRAF-interacting protein with forkhead-associated domain     |

Supplemental Table 1a  
eMSC vs. eEP

|         |                  |            |      |                                                                      |
|---------|------------------|------------|------|----------------------------------------------------------------------|
| 7900555 | RP4-692D3.1      | -3.3437345 | down | hypothetical protein LOC728621                                       |
| 8019988 | PTPRM            | -3.3465102 | down | protein tyrosine phosphatase, receptor type, M                       |
| 8089478 | GCET2            | -3.351599  | down | germinal center expressed transcript 2                               |
| 8133360 | CLDN4            | -3.357702  | down | claudin 4                                                            |
| 7899615 | SERINC2 KIAA0746 | -3.3618116 | down | serine incorporator 2   KIAA0746 protein                             |
| 7902660 | WDR63            | -3.3670294 | down | WD repeat domain 63                                                  |
| 8151824 | RAD54B LOC10012  | -3.3799765 | down | RAD54 homolog B ( <i>S. cerevisiae</i> )   similar to fibrinogen sil |
| 7921862 | C1orf192         | -3.382373  | down | chromosome 1 open reading frame 192                                  |
| 8045736 | FMNL2            | -3.383241  | down | formin-like 2                                                        |
| 8121622 | RSHL3            | -3.3844845 | down | radial spokehead-like 3                                              |
| 8097098 | USP53            | -3.390392  | down | ubiquitin specific peptidase 53                                      |
| 8096682 | FLJ20184         | -3.4037678 | down |                                                                      |
| 8162059 | SLC28A3          | -3.4084795 | down | solute carrier family 28 (sodium-coupled nucleoside trans            |
| 8090180 | MUC13            | -3.4098163 | down | mucin 13, cell surface associated                                    |
| 8094134 | DUB4             | -3.412291  | down |                                                                      |
| 8088247 | ARHGEF3          | -3.4141111 | down | Rho guanine nucleotide exchange factor (GEF) 3                       |
| 7974835 | PRKCH            | -3.4160037 | down | protein kinase C, eta                                                |
| 8107920 | SLC22A5          | -3.4161685 | down | solute carrier family 22 (organic cation/carnitine transpor          |
| 8055702 | NMI              | -3.4246047 | down | N-myc (and STAT) interactor                                          |
| 8054511 | LOC205251        | -3.4378133 | down |                                                                      |
| 7926679 | KIAA1217         | -3.44678   | down |                                                                      |
| 8057719 | HIBCH            | -3.4545183 | down | 3-hydroxyisobutyryl-Coenzyme A hydrolase                             |
| 8056022 | CCDC148          | -3.458953  | down | coiled-coil domain containing 148                                    |
| 7996198 | CCDC113          | -3.461543  | down | coiled-coil domain containing 113                                    |
| 8056710 | LOC129881        | -3.4707088 | down |                                                                      |
| 7961891 | BHLHB3           | -3.4707687 | down | basic helix-loop-helix domain containing, class B, 3                 |
| 8022711 | DSC2             | -3.4714332 | down | desmocollin 2                                                        |
| 7932453 | NEBL             | -3.4728525 | down | nebullette                                                           |
| 8122045 | AKAP7            | -3.475508  | down | A kinase (PRKA) anchor protein 7                                     |
| 8123609 | SERPINB9         | -3.47739   | down | serpin peptidase inhibitor, clade B (ovalbumin), member 9            |
| 8027260 | ZNF486           | -3.486245  | down | zinc finger protein 486                                              |
| 8132013 | CHN2             | -3.4866245 | down | chimerin (chimaerin) 2                                               |
| 7947147 | SVIP             | -3.4966807 | down | small VCP/p97-interacting protein                                    |

Supplemental Table 1a  
eMSC vs. eEP

|         |                 |            |      |                                                             |
|---------|-----------------|------------|------|-------------------------------------------------------------|
| 8100994 | CXCL2           | -3.5191553 | down | chemokine (C-X-C motif) ligand 2                            |
| 8021727 | CNDP2           | -3.521917  | down | CNDP dipeptidase 2 (metallopeptidase M20 family)            |
| 8016847 | TRIM25          | -3.5243187 | down | tripartite motif-containing 25                              |
| 8116983 | CD83            | -3.5244668 | down |                                                             |
| 8015900 | TMEM101         | -3.525694  | down | transmembrane protein 101                                   |
| 7933139 | ZNF33B          | -3.5295784 | down | zinc finger protein 33B                                     |
| 8143601 | CTAGE6 CTAGE4 L | -3.533298  | down | CTAGE family, member 6   CTAGE family, member 4   sim       |
| 7952036 | MPZL3           | -3.537339  | down | myelin protein zero-like 3                                  |
| 8115147 | CD74            | -3.5383148 | down |                                                             |
| 8058670 | IKZF2           | -3.5385306 | down | IKAROS family zinc finger 2 (Helios)                        |
| 7987369 | ATPBD4          | -3.5386364 | down | ATP binding domain 4                                        |
| 8138613 | OSBPL3          | -3.5387251 | down | oxysterol binding protein-like 3                            |
| 8120102 | CD2AP           | -3.5416067 | down | CD2-associated protein                                      |
| 7918973 | SPAG17          | -3.544177  | down | sperm associated antigen 17                                 |
| 8124498 | ZNF204          | -3.5444064 | down | zinc finger protein 204 (pseudogene)                        |
| 8103695 | MFAP3L          | -3.5459661 | down | microfibrillar-associated protein 3-like                    |
| 7951686 | IL18            | -3.5493233 | down | interleukin 18 (interferon-gamma-inducing factor)           |
| 8012126 | CLDN7           | -3.5554478 | down | claudin 7                                                   |
| 8078014 | SLC6A6          | -3.5607278 | down | solute carrier family 6 (neurotransmitter transporter, taur |
| 8105596 | RGS7BP          | -3.5622241 | down | regulator of G-protein signaling 7 binding protein          |
| 8027241 | ZNF253          | -3.5627944 | down | zinc finger protein 253                                     |
| 8060949 | ANKRD5          | -3.5666125 | down | ankyrin repeat domain 5                                     |
| 8099834 | TLR1            | -3.5684474 | down | toll-like receptor 1                                        |
| 7954729 | FGD4            | -3.577941  | down | FYVE, RhoGEF and PH domain containing 4                     |
| 8120279 | LRRC1           | -3.583445  | down | leucine rich repeat containing 1                            |
| 7932326 | CUBN            | -3.593314  | down | cubilin (intrinsic factor-cobalamin receptor)               |
| 7970441 | GJB2            | -3.6141248 | down | gap junction protein, beta 2, 26kDa                         |
| 8056285 | IFIH1           | -3.6141431 | down | interferon induced with helicase C domain 1                 |
| 8046003 | GCA             | -3.6169035 | down | grancalcin, EF-hand calcium binding protein                 |
| 8130768 | RNASET2 LOC1001 | -3.6234715 | down | ribonuclease T2   hypothetical protein LOC100131869         |
| 7932390 | TRDMT1          | -3.6276073 | down | tRNA aspartic acid methyltransferase 1                      |
| 8092177 | AADACL1         | -3.6284404 | down | arylacetamide deacetylase-like 1                            |
| 8136315 | LRGUK           | -3.630475  | down | leucine-rich repeats and guanylate kinase domain contain    |



Supplemental Table 1a  
eMSC vs. eEP

|         |                   |            |      |                                                             |
|---------|-------------------|------------|------|-------------------------------------------------------------|
| 8152845 | FAM49B            | -3.6336608 | down | family with sequence similarity 49, member B                |
| 8078971 | ENTPD3            | -3.6417644 | down | ectonucleoside triphosphate diphosphohydrolase 3            |
| 7932420 | PTPLA             | -3.650616  | down | protein tyrosine phosphatase-like (proline instead of catal |
| 7946365 | STK33             | -3.6609976 | down | serine/threonine kinase 33                                  |
| 7979269 | GCH1              | -3.6649933 | down | GTP cyclohydrolase 1 (dopa-responsive dystonia)             |
| 8169492 | AGTR2             | -3.6652412 | down | angiotensin II receptor, type 2                             |
| 8106280 | HMGCR             | -3.6662316 | down | 3-hydroxy-3-methylglutaryl-Coenzyme A reductase             |
| 8093258 | IQCG              | -3.6695123 | down | IQ motif containing G                                       |
| 8109629 | FABP6             | -3.6754816 | down | fatty acid binding protein 6, ileal (gastrotropin)          |
| 8144880 | SH2D4A            | -3.6828976 | down | SH2 domain containing 4A                                    |
| 8008564 | OK/KNS-CL.3       | -3.683015  | down |                                                             |
| 7932552 | LOC100128663   PR | -3.6887503 | down | similar to PRO3077   hypothetical protein PRO3077           |
| 8156770 | GALNT12           | -3.698201  | down | UDP-N-acetyl-alpha-D-galactosamine:polypeptide N-acety      |
| 8108912 | SH3RF2            | -3.7133536 | down | SH3 domain containing ring finger 2                         |
| 8162019 | KIF27   LOC389765 | -3.7148216 | down | kinesin family member 27   similar to KIF27C                |
| 8129649 | C6orf192          | -3.714878  | down | chromosome 6 open reading frame 192                         |
| 8080863 | FLJ44379          | -3.720138  | down | similar to S-100 protein, alpha chain                       |
| 8166104 | OFD1              | -3.7345388 | down | oral-facial-digital syndrome 1                              |
| 8045816 | GPD2              | -3.7394514 | down | glycerol-3-phosphate dehydrogenase 2 (mitochondrial)        |
| 8128726 | PPIL6             | -3.7459543 | down | peptidylprolyl isomerase (cyclophilin)-like 6               |
| 8166469 | SAT1              | -3.7470303 | down | spermidine/spermine N1-acetyltransferase 1                  |
| 8122202 | MYB               | -3.7506988 | down | v-myb myeloblastosis viral oncogene homolog (avian)         |
| 8008629 | DGKE              | -3.7541726 | down | diacylglycerol kinase, epsilon 64kDa                        |
| 8074856 | PRAME             | -3.759315  | down | preferentially expressed antigen in melanoma                |
| 8101126 | CXCL10            | -3.7664876 | down | chemokine (C-X-C motif) ligand 10                           |
| 8156164 | LOC389765         | -3.7679105 | down | similar to KIF27C                                           |
| 8101992 | SLC39A8           | -3.7716918 | down | solute carrier family 39 (zinc transporter), member 8       |
| 8150036 | KIF13B            | -3.784967  | down | kinesin family member 13B                                   |
| 8117106 | RNF144B           | -3.787368  | down | ring finger 144B                                            |
| 8160531 | C9orf72           | -3.788182  | down | chromosome 9 open reading frame 72                          |
| 7902977 | KIAA1107          | -3.7956362 | down |                                                             |
| 8129783 | MAP7              | -3.8011544 | down | microtubule-associated protein 7                            |
| 8120335 | FAM83B            | -3.8044436 | down | family with sequence similarity 83, member B                |

Supplemental Table 1a  
eMSC vs. eEP

|         |                 |            |      |                                                              |
|---------|-----------------|------------|------|--------------------------------------------------------------|
| 8136936 | CTAGE6 CTAGE4 L | -3.8105626 | down | CTAGE family, member 6   CTAGE family, member 4   sim        |
| 7923929 | PIGR            | -3.8143103 | down | polymeric immunoglobulin receptor                            |
| 8140668 | SEMA3A          | -3.8143985 | down | sema domain, immunoglobulin domain (Ig), short basic dc      |
| 8057821 | DNAH7           | -3.8212845 | down | dynein, axonemal, heavy chain 7                              |
| 8063601 | C20orf85        | -3.825598  | down | chromosome 20 open reading frame 85                          |
| 8049969 | SH3YL1          | -3.8462174 | down | SH3 domain containing, Ysc84-like 1 ( <i>S. cerevisiae</i> ) |
| 7980744 | RPS6KA5         | -3.851571  | down | ribosomal protein S6 kinase, 90kDa, polypeptide 5            |
| 8023855 | CYB5A           | -3.8528388 | down | cytochrome b5 type A (microsomal)                            |
| 8088322 | DNAH12L         | -3.8617368 | down | dynein, axonemal, heavy chain 12-like                        |
| 8123936 | NEDD9           | -3.8621664 | down | neural precursor cell expressed, developmentally down-re     |
| 8042468 | ANXA4           | -3.8707366 | down | annexin A4                                                   |
| 8077899 | PPARG           | -3.8955922 | down | peroxisome proliferator-activated receptor gamma             |
| 7918134 | AMY1A AMY1B AM  | -3.8956962 | down | amylase, alpha 1A (salivary)   amylase, alpha 1B (salivary)  |
| 8058824 | MREG            | -3.9052365 | down | melanoregulin                                                |
| 7903440 | AMY1A AMY1B AM  | -3.910519  | down | amylase, alpha 1A (salivary)   amylase, alpha 1B (salivary)  |
| 7903425 | AMY1A AMY1B AM  | -3.9114    | down | amylase, alpha 1A (salivary)   amylase, alpha 1B (salivary)  |
| 7925492 | OPN3            | -3.912689  | down | opsin 3                                                      |
| 7971015 | SMAD9           | -3.9195738 | down | SMAD family member 9                                         |
| 7965226 | RASSF9          | -3.9202087 | down | Ras association (RalGDS/AF-6) domain family (N-terminal)     |
| 7971246 | KIAA0564        | -3.9250586 | down |                                                              |
| 8122336 | C6orf115        | -3.9282362 | down | chromosome 6 open reading frame 115                          |
| 7910611 | KCNK1           | -3.9305267 | down | potassium channel, subfamily K, member 1                     |
| 8096130 | CDS1            | -3.931983  | down | CDP-diacylglycerol synthase (phosphatidate cytidyl)trans     |
| 7907861 | XPR1            | -3.9349308 | down | xenotropic and polytropic retrovirus receptor                |
| 7926356 | PTER            | -3.967948  | down | phosphotriesterase related                                   |
| 8092295 | CCDC39          | -3.9741    | down | coiled-coil domain containing 39                             |
| 8088315 | ASB14 DNAH12    | -3.9756691 | down | ankyrin repeat and SOCS box-containing 14   dynein, axor     |
| 8138689 | SKAP2           | -3.9906092 | down | src kinase associated phosphoprotein 2                       |
| 7900635 | hCG_23177       | -3.9910336 | down | hCG23177                                                     |
| 8011713 | CXCL16          | -4.0024247 | down | chemokine (C-X-C motif) ligand 16                            |
| 8100768 | UGT2B11 UGT2B1C | -4.011545  | down | UDP glucuronosyltransferase 2 family, polypeptide B11   U    |
| 8174119 | ZMAT1           | -4.0152674 | down | zinc finger, matrin type 1                                   |
| 8151475 | TPD52           | -4.016515  | down | tumor protein D52                                            |

Supplemental Table 1a  
eMSC vs. eEP

|         |                 |            |      |                                                                       |
|---------|-----------------|------------|------|-----------------------------------------------------------------------|
| 8155540 | CNTNAP3B LOC388 | -4.029134  | down | contactin associated protein-like 3B   similar to KIAA1714            |
| 7900365 | MFSD2           | -4.0312843 | down | major facilitator superfamily domain containing 2                     |
| 8146921 | RDH10           | -4.0382423 | down | retinol dehydrogenase 10 (all-trans)                                  |
| 8161460 | CNTNAP3B LOC388 | -4.038605  | down | contactin associated protein-like 3B   similar to KIAA1714            |
| 8096425 | MGC48628        | -4.0498066 | down | similar to KIAA1680 protein                                           |
| 8083743 | ARL14           | -4.0534396 | down | ADP-ribosylation factor-like 14                                       |
| 8043071 | LOC200383       | -4.0744824 | down | similar to Dynein heavy chain at 16F                                  |
| 8023267 | MYO5B           | -4.0745792 | down | myosin VB                                                             |
| 8106950 | FAM81B          | -4.075667  | down | family with sequence similarity 81, member B                          |
| 8145365 | DOCK5           | -4.0847063 | down | dedicator of cytokinesis 5                                            |
| 7931281 | FANK1           | -4.0932903 | down | fibronectin type III and ankyrin repeat domains 1                     |
| 7963212 | SLC11A2         | -4.095734  | down | solute carrier family 11 (proton-coupled divalent metal ion)          |
| 7918504 | OVGP1           | -4.108554  | down | oviductal glycoprotein 1, 120kDa (mucin 9, oviductin)                 |
| 7916570 | OMA1 DAB1       | -4.144395  | down | OMA1 homolog, zinc metallopeptidase ( <i>S. cerevisiae</i> )   di-    |
| 8063410 | PARD6B          | -4.1467896 | down | par-6 partitioning defective 6 homolog beta ( <i>C. elegans</i> )     |
| 7980828 | CCDC88C         | -4.150734  | down | coiled-coil domain containing 88C                                     |
| 8145586 | ELP3            | -4.1532536 | down | elongation protein 3 homolog ( <i>S. cerevisiae</i> )                 |
| 7978376 | STXBP6          | -4.1581135 | down | syntaxin binding protein 6 (amisyn)                                   |
| 7936529 | KIAA1598        | -4.167135  | down |                                                                       |
| 7943740 | FLJ46266        | -4.172106  | down |                                                                       |
| 8022145 | L3MBTL4         | -4.177389  | down | l(3)mbt-like 4 ( <i>Drosophila</i> )                                  |
| 8147206 | RIPK2           | -4.1883526 | down | receptor-interacting serine-threonine kinase 2                        |
| 7962185 | AMN1            | -4.18951   | down | antagonist of mitotic exit network 1 homolog ( <i>S. cerevisiae</i> ) |
| 8123695 | PECI            | -4.2023144 | down | peroxisomal D3,D2-enoyl-CoA isomerase                                 |
| 8164013 | STRBP           | -4.2052503 | down | spermatid perinuclear RNA binding protein                             |
| 8147221 | OSGIN2          | -4.205299  | down | oxidative stress induced growth inhibitor family member 2             |
| 8060997 | SPTLC3          | -4.216949  | down | serine palmitoyltransferase, long chain base subunit 3                |
| 8167930 | FAAH2           | -4.219482  | down | fatty acid amide hydrolase 2                                          |
| 8150002 | FBXO16 ZNF395   | -4.224798  | down | F-box protein 16   zinc finger protein 395                            |
| 7903144 | SLC44A3         | -4.2328176 | down | solute carrier family 44, member 3                                    |
| 8035789 | ZNF826 ZNF737   | -4.2372394 | down | zinc finger protein 826   zinc finger protein 737                     |
| 8146717 | SGK3 C8orf44    | -4.2376595 | down | serum/glucocorticoid regulated kinase family, member 3                |
| 8104035 | SORBS2          | -4.284807  | down | sorbin and SH3 domain containing 2                                    |

Supplemental Table 1a  
eMSC vs. eEP

|         |                  |            |      |                                                               |
|---------|------------------|------------|------|---------------------------------------------------------------|
| 7995697 | LPCAT2           | -4.2979507 | down | lysophosphatidylcholine acyltransferase 2                     |
| 8155747 | C9orf135         | -4.2999597 | down | chromosome 9 open reading frame 135                           |
| 8081826 | UPK1B            | -4.308591  | down | uroplakin 1B                                                  |
| 8174141 | BEX5             | -4.3258023 | down | BEX family member 5                                           |
| 7954711 | C12orf35         | -4.3483543 | down | chromosome 12 open reading frame 35                           |
| 7916616 | CYP2J2           | -4.348792  | down | cytochrome P450, family 2, subfamily J, polypeptide 2         |
| 8105585 | RNF180           | -4.354467  | down | ring finger protein 180                                       |
| 8131475 | C1GALT1          | -4.362079  | down | core 1 synthase, glycoprotein-N-acetylgalactosamine 3-be      |
| 8085164 | SRGAP3           | -4.369743  | down | SLIT-ROBO Rho GTPase activating protein 3                     |
| 8161945 | RASEF            | -4.374237  | down | RAS and EF-hand domain containing                             |
| 8005603 | SLC47A1          | -4.3841367 | down | solute carrier family 47, member 1                            |
| 8091922 | WDR49            | -4.388364  | down | WD repeat domain 49                                           |
| 8131600 | TSPAN13          | -4.399378  | down | tetraspanin 13                                                |
| 8066536 | WFDC6 SPINLW1    | -4.4064403 | down | WAP four-disulfide core domain 6   serine peptidase inhib     |
| 8136979 | CTAGE6 CTAGE4 L  | -4.409724  | down | CTAGE family, member 6   CTAGE family, member 4   CTA         |
| 7974090 | CTAGE5           | -4.4099107 | down | CTAGE family, member 5                                        |
| 8126750 | ENPP5            | -4.411404  | down | ectonucleotide pyrophosphatase/phosphodiesterase 5 (pi        |
| 8039013 | ZNF321           | -4.415701  | down | zinc finger protein 321                                       |
| 8118345 | CFB              | -4.417442  | down | complement factor B                                           |
| 8140468 | tcag7.1314       | -4.418157  | down | hypothetical protein LOC54103                                 |
| 7926545 | PLXDC2           | -4.4191117 | down | plexin domain containing 2                                    |
| 8090988 | CEP70            | -4.444928  | down | centrosomal protein 70kDa                                     |
| 7899534 | EPB41            | -4.4452868 | down | erythrocyte membrane protein band 4.1 (elliptocytosis 1,      |
| 8147439 | PLEKHF2          | -4.4607    | down | pleckstrin homology domain containing, family F (with FY      |
| 8045539 | KYNU             | -4.4631953 | down | kynureninase (L-kynurenine hydrolase)                         |
| 8126729 | CLIC5 LOC1001316 | -4.4640923 | down | chloride intracellular channel 5   similar to chloride intrac |
| 7919800 | CTSS             | -4.4667253 | down | cathepsin S                                                   |
| 7902738 | CLCA4            | -4.4702916 | down | chloride channel, calcium activated, family member 4          |
| 7898957 | RCAN3            | -4.4714055 | down | RCAN family member 3                                          |
| 8103226 | TMEM154          | -4.473755  | down | transmembrane protein 154                                     |
| 8015349 | KRT19            | -4.4823737 | down | keratin 19                                                    |
| 7950307 | UCP2             | -4.4896326 | down | uncoupling protein 2 (mitochondrial, proton carrier)          |
| 8161270 | ANKRD18A         | -4.4918394 | down | ankyrin repeat domain 18A                                     |

Supplemental Table 1a  
eMSC vs. eEP

|         |                  |            |      |                                                              |
|---------|------------------|------------|------|--------------------------------------------------------------|
| 8147848 | OXR1             | -4.502335  | down | oxidation resistance 1                                       |
| 7944667 | SORL1            | -4.51197   | down | sortilin-related receptor, L(DLR class) A repeats-containing |
| 8021470 | PMAIP1           | -4.528649  | down | phorbol-12-myristate-13-acetate-induced protein 1            |
| 7917037 | CRYZ             | -4.5344462 | down | crystallin, zeta (quinone reductase)                         |
| 7903414 | AMY2A AMY1A AM   | -4.5491996 | down | amylase, alpha 2A (pancreatic)   amylase, alpha 1A (saliva   |
| 8156199 | DAPK1            | -4.5511155 | down | death-associated protein kinase 1                            |
| 7909494 | SYT14            | -4.5755076 | down | synaptotagmin XIV                                            |
| 8102214 | PAPSS1           | -4.5755124 | down | 3'-phosphoadenosine 5'-phosphosulfate synthase 1             |
| 8037205 | CEACAM1          | -4.577798  | down | carcinoembryonic antigen-related cell adhesion molecule      |
| 8130505 | EZR              | -4.5855556 | down | ezrin                                                        |
| 7903227 | PALMD            | -4.608903  | down | palmdelphin                                                  |
| 8098195 | SC4MOL           | -4.611501  | down | sterol-C4-methyl oxidase-like                                |
| 7918936 | VTCN1            | -4.6378508 | down | V-set domain containing T cell activation inhibitor 1        |
| 7934334 | TTC18            | -4.645395  | down | tetratricopeptide repeat domain 18                           |
| 8118548 | HLA-DRA          | -4.6677375 | down | major histocompatibility complex, class II, DR alpha         |
| 8150225 | RAB11FIP1        | -4.6775    | down | RAB11 family interacting protein 1 (class I)                 |
| 8142981 | PODXL            | -4.6896315 | down | podocalyxin-like                                             |
| 7909768 | SPATA17          | -4.6913133 | down | spermatogenesis associated 17                                |
| 8008609 | ANKFN1           | -4.6934614 | down | ankyrin-repeat and fibronectin type III domain containing    |
| 8107798 | SLC27A6          | -4.7093205 | down | solute carrier family 27 (fatty acid transporter), member 6  |
| 8048717 | SGPP2            | -4.7217283 | down | sphingosine-1-phosphate phosphatase 2                        |
| 8178115 | CFB              | -4.7305408 | down | complement factor B                                          |
| 7903959 | C1orf88          | -4.7397466 | down | chromosome 1 open reading frame 88                           |
| 8139680 | COBL             | -4.742825  | down | cordon-bleu homolog (mouse)                                  |
| 8109194 | SLC26A2          | -4.7721863 | down | solute carrier family 26 (sulfate transporter), member 2     |
| 7948058 | FOLH1 PSMAL      | -4.7742434 | down | folate hydrolase (prostate-specific membrane antigen) 1      |
| 7960529 | SCNN1A           | -4.7891755 | down | sodium channel, nonvoltage-gated 1 alpha                     |
| 8099841 | TLR6             | -4.809997  | down | toll-like receptor 6                                         |
| 8179481 | HLA-DRA          | -4.8122416 | down | major histocompatibility complex, class II, DR alpha         |
| 8146967 | CRISPLD1         | -4.850576  | down | cysteine-rich secretory protein LCCL domain containing 1     |
| 8166671 | CXorf22          | -4.8531785 | down | chromosome X open reading frame 22                           |
| 8028311 | SPINT2 LOC100130 | -4.864831  | down | serine peptidase inhibitor, Kunitz type, 2   hypothetical pr |
| 8072735 | APOL1            | -4.8845534 | down | apolipoprotein L, 1                                          |

Supplemental Table 1a  
eMSC vs. eEP

|         |                  |            |      |                                                             |
|---------|------------------|------------|------|-------------------------------------------------------------|
| 7942998 | PSMAL FOLH1      | -4.886307  | down | growth-inhibiting protein 26   folate hydrolase (prostate-  |
| 7980891 | TC2N             | -4.904226  | down | tandem C2 domains, nuclear                                  |
| 8112274 | ELOVL7           | -4.9251075 | down | ELOVL family member 7, elongation of long chain fatty aci   |
| 8117243 | LRRC16A          | -4.925721  | down | leucine rich repeat containing 16A                          |
| 8114006 | FLJ44796         | -4.926908  | down |                                                             |
| 8088299 | DNHD2            | -4.9279513 | down | dynein heavy chain domain 2                                 |
| 7898623 | UBXD3            | -4.9358406 | down | UBX domain containing 3                                     |
| 7957072 | RAB3IP           | -4.9414787 | down | RAB3A interacting protein (rabin3)                          |
| 8127158 | GCLC             | -4.945601  | down | glutamate-cysteine ligase, catalytic subunit                |
| 8089299 | CD47             | -4.946408  | down |                                                             |
| 8042993 | CTNNA2           | -4.950772  | down | catenin (cadherin-associated protein), alpha 2              |
| 8091991 | MDS1             | -4.951437  | down | myelodysplasia syndrome 1                                   |
| 8014248 | SLFN13           | -4.960229  | down | schlafen family member 13                                   |
| 8047062 | MGC13057         | -4.960816  | down |                                                             |
| 8149097 | DEFB1            | -4.978336  | down | defensin, beta 1                                            |
| 7954196 | MGST1            | -5.010524  | down | microsomal glutathione S-transferase 1                      |
| 8131719 | DNAH11           | -5.0418124 | down | dynein, axonemal, heavy chain 11                            |
| 7935270 | BLNK             | -5.0468907 | down | B-cell linker                                               |
| 8056408 | GALNT3           | -5.0804863 | down | UDP-N-acetyl-alpha-D-galactosamine:polypeptide N-acety      |
| 8094533 | FLJ16686         | -5.081125  | down |                                                             |
| 8043043 | DNHL1 LOC200383  | -5.0821977 | down | dynein heavy chain-like 1   similar to Dynein heavy chain ; |
| 7963567 | KRT8             | -5.1055346 | down | keratin 8                                                   |
| 7926622 | SPAG6            | -5.1164575 | down | sperm associated antigen 6                                  |
| 8015133 | KRT23            | -5.118476  | down | keratin 23 (histone deacetylase inducible)                  |
| 8155734 | C9orf61          | -5.120518  | down | chromosome 9 open reading frame 61                          |
| 8146579 | CHD7             | -5.121241  | down | chromodomain helicase DNA binding protein 7                 |
| 8178193 | HLA-DRA          | -5.1278806 | down | major histocompatibility complex, class II, DR alpha        |
| 8121838 | TPD52L1          | -5.146699  | down | tumor protein D52-like 1                                    |
| 8135341 | FLJ23834         | -5.1469307 | down |                                                             |
| 8112439 | CCDC125          | -5.16526   | down | coiled-coil domain containing 125                           |
| 8097017 | UGT8             | -5.1726265 | down | UDP glycosyltransferase 8 (UDP-galactose ceramide galact    |
| 8059878 | IQCA LOC1001292! | -5.209181  | down | IQ motif containing with AAA domain   hypothetical prote    |
| 8132151 | ADCYAP1R1        | -5.2202806 | down | adenylate cyclase activating polypeptide 1 (pituitary) rece |

Supplemental Table 1a  
eMSC vs. eEP

|         |                 |            |      |                                                              |
|---------|-----------------|------------|------|--------------------------------------------------------------|
| 8129560 | CTAGE6 CTAGE4 L | -5.224629  | down | CTAGE family, member 6   CTAGE family, member 4   CTA        |
| 8106068 | MCCC2           | -5.2372613 | down | methylcrotonoyl-Coenzyme A carboxylase 2 (beta)              |
| 8177628 | CCDC125         | -5.2386684 | down | coiled-coil domain containing 125                            |
| 8177601 | MCCC2           | -5.239421  | down | methylcrotonoyl-Coenzyme A carboxylase 2 (beta)              |
| 8114354 | NME5            | -5.249451  | down | non-metastatic cells 5, protein expressed in (nucleoside-d   |
| 8095021 | SPATA18         | -5.2762012 | down | spermatogenesis associated 18 homolog (rat)                  |
| 8098328 | GALNT7          | -5.2849474 | down | UDP-N-acetyl-alpha-D-galactosamine:polypeptide N-acety       |
| 8138202 | ICA1            | -5.2975593 | down | islet cell autoantigen 1, 69kDa                              |
| 8056113 | LY75            | -5.3531814 | down | lymphocyte antigen 75                                        |
| 8102877 | CLGN            | -5.3561316 | down | calmegin                                                     |
| 8144712 | C8orf79         | -5.372137  | down | chromosome 8 open reading frame 79                           |
| 8099967 | RBM47           | -5.3915963 | down | RNA binding motif protein 47                                 |
| 7917019 | C1orf173        | -5.3974695 | down | chromosome 1 open reading frame 173                          |
| 7922976 | PTGS2           | -5.4081454 | down | prostaglandin-endoperoxide synthase 2 (prostaglandin G/      |
| 8086517 | CDCP1           | -5.425468  | down | CUB domain containing protein 1                              |
| 8123598 | SERPINB1        | -5.4347143 | down | serpin peptidase inhibitor, clade B (ovalbumin), member 1    |
| 8121277 | AIM1            | -5.4550595 | down | absent in melanoma 1                                         |
| 8120719 | CD109           | -5.4804854 | down |                                                              |
| 8152506 | SAMD12          | -5.484707  | down | sterile alpha motif domain containing 12                     |
| 7969533 | SLAIN1          | -5.524406  | down | SLAIN motif family, member 1                                 |
| 8147661 | SPAG1           | -5.547193  | down | sperm associated antigen 1                                   |
| 8177222 | CD24            | -5.5599446 | down |                                                              |
| 8109490 | SGCD            | -5.579811  | down | sarcoglycan, delta (35kDa dystrophin-associated glycoprot    |
| 7976488 | SERPINA5        | -5.5842233 | down | serpin peptidase inhibitor, clade A (alpha-1 antiproteinase  |
| 8140534 | SEMA3C          | -5.584299  | down | sema domain, immunoglobulin domain (Ig), short basic dc      |
| 7901720 | PRKAA2          | -5.5856676 | down | protein kinase, AMP-activated, alpha 2 catalytic subunit     |
| 7994058 | SCNN1G          | -5.5990777 | down | sodium channel, nonvoltage-gated 1, gamma                    |
| 8008547 | TOM1L1          | -5.611972  | down | target of myb1 (chicken)-like 1                              |
| 7947199 | LGR4            | -5.615606  | down | leucine-rich repeat-containing G protein-coupled receptor    |
| 8083839 | GPR160          | -5.6230226 | down | G protein-coupled receptor 160                               |
| 7908793 | ELF3            | -5.637031  | down | E74-like factor 3 (ets domain transcription factor, epitheli |
| 7976496 | SERPINA3        | -5.6406646 | down | serpin peptidase inhibitor, clade A (alpha-1 antiproteinase  |
| 7965964 | SLC41A2         | -5.647759  | down | solute carrier family 41, member 2                           |

Supplemental Table 1a  
eMSC vs. eEP

|         |                |            |      |                                                             |
|---------|----------------|------------|------|-------------------------------------------------------------|
| 8113483 | XIRP1 FLJ43080 | -5.649401  | down | xin actin-binding repeat containing 1   hypothetical protei |
| 8016414 | SKAP1          | -5.653813  | down | src kinase associated phosphoprotein 1                      |
| 7968866 | C13orf30       | -5.672785  | down | chromosome 13 open reading frame 30                         |
| 7935776 | PRO1933        | -5.677565  | down |                                                             |
| 8141094 | PDK4           | -5.6797915 | down | pyruvate dehydrogenase kinase, isozyme 4                    |
| 8091411 | TM4SF1         | -5.6851807 | down | transmembrane 4 L six family member 1                       |
| 8106403 | F2RL1          | -5.702222  | down | coagulation factor II (thrombin) receptor-like 1            |
| 8044818 | hCG_17324      | -5.7196517 | down | primary ciliary dyskinesia protein 1                        |
| 8023314 | CCDC11         | -5.7235436 | down | coiled-coil domain containing 11                            |
| 7953291 | CD9            | -5.7373643 | down |                                                             |
| 7916584 | TACSTD2        | -5.7535977 | down | tumor-associated calcium signal transducer 2                |
| 8083978 | NAALADL2       | -5.7716784 | down | N-acetylated alpha-linked acidic dipeptidase-like 2         |
| 7961365 | MANSC1         | -5.799054  | down | MANSC domain containing 1                                   |
| 7965343 | WDR51B GALNT4  | -5.8106456 | down | WD repeat domain 51B   UDP-N-acetyl-alpha-D-galactosa       |
| 8144701 | LOC100131581   | -5.8263845 | down |                                                             |
| 8140478 | tcag7.1314     | -5.8331976 | down | hypothetical protein LOC54103                               |
| 8120967 | NT5E           | -5.8415875 | down | 5'-nucleotidase, ecto (CD73)                                |
| 8081645 | C3orf52        | -5.855621  | down | chromosome 3 open reading frame 52                          |
| 8146092 | INDO           | -5.985944  | down | indoleamine-pyrrole 2,3 dioxygenase                         |
| 8133770 | CCDC146        | -5.9902453 | down | coiled-coil domain containing 146                           |
| 8123407 | MLLT4          | -6.027612  | down | myeloid/lymphoid or mixed-lineage leukemia (trithorax ho    |
| 8016463 | HOXB6          | -6.039854  | down | homeobox B6                                                 |
| 7957023 | LYZ            | -6.048667  | down | lysozyme (renal amyloidosis)                                |
| 8043059 | LOC200383      | -6.079528  | down | similar to Dynein heavy chain at 16F                        |
| 7916506 | C1orf168       | -6.0832405 | down | chromosome 1 open reading frame 168                         |
| 8056184 | ITGB6          | -6.1382856 | down | integrin, beta 6                                            |
| 8054166 | TSGA10         | -6.1647973 | down | testis specific, 10                                         |
| 8140686 | SEMA3D         | -6.1891494 | down | sema domain, immunoglobulin domain (Ig), short basic dc     |
| 8166243 | REPS2          | -6.2121196 | down | RALBP1 associated Eps domain containing 2                   |
| 7932598 | C10orf63       | -6.2273626 | down | chromosome 10 open reading frame 63                         |
| 7957433 | LRRIQ1         | -6.244115  | down | leucine-rich repeats and IQ motif containing 1              |
| 7981068 | SERPINA1       | -6.25211   | down | serpin peptidase inhibitor, clade A (alpha-1 antiproteinase |
| 8098021 | GRIA2          | -6.255166  | down | glutamate receptor, ionotropic, AMPA 2                      |



Supplemental Table 1a  
eMSC vs. eEP

|         |                     |            |      |                                                                          |
|---------|---------------------|------------|------|--------------------------------------------------------------------------|
| 8082012 | SLC15A2             | -6.2681    | down | solute carrier family 15 (H <sup>+</sup> /peptide transporter), member 2 |
| 7921713 | F11R hCG_20857 F11R | -6.287763  | down | F11 receptor   hypothetical protein LOC100134860   KAT5                  |
| 7917576 | GBP5                | -6.3273034 | down | guanylate binding protein 5                                              |
| 8144481 | DEFB4               | -6.3506036 | down | defensin, beta 4                                                         |
| 8054712 | IL1A                | -6.372771  | down | interleukin 1, alpha                                                     |
| 8100298 | OCIAD2              | -6.37884   | down | OCIA domain containing 2                                                 |
| 8149169 | DEFB4               | -6.387553  | down | defensin, beta 4                                                         |
| 7920642 | MUC1                | -6.3971167 | down | mucin 1, cell surface associated                                         |
| 8081657 | CD200               | -6.412391  | down |                                                                          |
| 8095680 | IL8                 | -6.4148207 | down | interleukin 8                                                            |
| 8155849 | ANXA1               | -6.5359907 | down | annexin A1                                                               |
| 7906079 | RAB25               | -6.632157  | down |                                                                          |
| 8068383 | CLIC6               | -6.6434402 | down | chloride intracellular channel 6                                         |
| 8106354 | IQGAP2              | -6.654801  | down | IQ motif containing GTPase activating protein 2                          |
| 8063187 | EYA2                | -6.7155037 | down | eyes absent homolog 2 (Drosophila)                                       |
| 7989501 | CA12                | -6.7318544 | down | carbonic anhydrase XII                                                   |
| 8081758 | GRAMD1C             | -6.737047  | down | GRAM domain containing 1C                                                |
| 8100210 | TXK                 | -6.814838  | down |                                                                          |
| 8094988 | FLJ21511            | -6.8947554 | down |                                                                          |
| 8148059 | DEPDC6              | -6.910281  | down | DEP domain containing 6                                                  |
| 8033674 | MUC16               | -6.95542   | down | mucin 16, cell surface associated                                        |
| 8129618 | VNN1                | -6.9749327 | down | vanin 1                                                                  |
| 7918294 | C1orf194            | -7.0137053 | down | chromosome 1 open reading frame 194                                      |
| 8040249 | ATP6V1C2            | -7.1116824 | down | ATPase, H <sup>+</sup> transporting, lysosomal 42kDa, V1 subunit C2      |
| 7988990 | WDR72               | -7.154825  | down | WD repeat domain 72                                                      |
| 7973875 | NPAS3               | -7.1572957 | down | neuronal PAS domain protein 3                                            |
| 8098611 | TLR3                | -7.18148   | down | toll-like receptor 3                                                     |
| 7951807 | CADM1 LOC100132764  | -7.248537  | down | cell adhesion molecule 1   hypothetical LOC100132764                     |
| 8117630 | ZNF165              | -7.2642727 | down | zinc finger protein 165                                                  |
| 8099121 | STX18               | -7.3058248 | down | syntaxin 18                                                              |
| 8116921 | EDN1                | -7.380295  | down | endothelin 1                                                             |
| 8099760 | CENTD1              | -7.397884  | down | centaurin, delta 1                                                       |
| 8019954 | FLJ35776            | -7.4434257 | down | hypothetical protein LOC649446                                           |

Supplemental Table 1a  
eMSC vs. eEP

|         |                  |            |      |                                                                          |
|---------|------------------|------------|------|--------------------------------------------------------------------------|
| 7961844 | CASC1            | -7.449282  | down | cancer susceptibility candidate 1                                        |
| 7969288 | OLFM4            | -7.5190783 | down | olfactomedin 4                                                           |
| 8095736 | AREG LOC727738   | -7.580549  | down | amphiregulin (schwannoma-derived growth factor)   simi                   |
| 8083146 | PLS1             | -7.586306  | down | plastin 1 (I isoform)                                                    |
| 7917276 | LPAR3            | -7.630666  | down | lysophosphatidic acid receptor 3                                         |
| 8088866 | CNTN3            | -7.6486616 | down | contactin 3 (plasmacytoma associated)                                    |
| 8163908 | GGTA1            | -7.665645  | down | glycoprotein, alpha-galactosyltransferase 1                              |
| 8067955 | CXADR            | -7.677333  | down | coxsackie virus and adenovirus receptor                                  |
| 7968678 | FREM2            | -7.6988683 | down | FRAS1 related extracellular matrix protein 2                             |
| 7951545 | EXPH5            | -7.700148  | down | exophilin 5                                                              |
| 7968637 | CCNA1            | -7.715602  | down | cyclin A1                                                                |
| 7907160 | ATP1B1           | -7.8649855 | down | ATPase, Na <sup>+</sup> /K <sup>+</sup> transporting, beta 1 polypeptide |
| 8147057 | CHMP4C           | -7.8958864 | down | chromatin modifying protein 4C                                           |
| 8063000 | WFDC2            | -7.9160986 | down | WAP four-disulfide core domain 2                                         |
| 8163149 | PTPN3            | -7.9232945 | down | protein tyrosine phosphatase, non-receptor type 3                        |
| 8116780 | DSP              | -7.954091  | down | desmoplakin                                                              |
| 7967993 | FGF9             | -7.975521  | down | fibroblast growth factor 9 (glia-activating factor)                      |
| 8099721 | KIAA0746 SERINC2 | -8.019043  | down | KIAA0746 protein   serine incorporator 2                                 |
| 8043197 | VAMP8            | -8.027269  | down | vesicle-associated membrane protein 8 (endobrevin)                       |
| 8112649 | KIAA0888         | -8.041538  | down |                                                                          |
| 7991034 | HOMER2           | -8.044038  | down | homer homolog 2 (Drosophila)                                             |
| 8122071 | ENPP3            | -8.131689  | down | ectonucleotide pyrophosphatase/phosphodiesterase 3                       |
| 8099476 | PROM1            | -8.144364  | down | prominin 1                                                               |
| 8120961 | C6orf117         | -8.151552  | down | chromosome 6 open reading frame 117                                      |
| 8147697 | GRHL2            | -8.16167   | down | grainyhead-like 2 (Drosophila)                                           |
| 8095744 | AREG LOC727738   | -8.211863  | down | amphiregulin (schwannoma-derived growth factor)   simi                   |
| 8057677 | SLC40A1          | -8.216726  | down | solute carrier family 40 (iron-regulated transporter), mem               |
| 7993756 | ACSM3            | -8.2574835 | down | acyl-CoA synthetase medium-chain family member 3                         |
| 8120061 | ENPP4            | -8.309228  | down | ectonucleotide pyrophosphatase/phosphodiesterase 4 (pi                   |
| 8131666 | ITGB8            | -8.477917  | down | integrin, beta 8                                                         |
| 8009476 | MAP2K6           | -8.552593  | down | mitogen-activated protein kinase kinase 6                                |
| 7936734 | FGFR2            | -8.583469  | down | fibroblast growth factor receptor 2 (bacteria-expressed ki               |
| 7939150 | PRRG4            | -8.60348   | down | proline rich Gla (G-carboxyglutamic acid) 4 (transmembra                 |

Supplemental Table 1a  
eMSC vs. eEP

|         |          |             |      |                                                                      |
|---------|----------|-------------|------|----------------------------------------------------------------------|
| 8094408 | ANAPC4   | -8.660345   | down | anaphase promoting complex subunit 4                                 |
| 7988876 | MYO5C    | -8.694235   | down | myosin VC                                                            |
| 8091887 | ZBBX     | -8.760009   | down | zinc finger, B-box domain containing                                 |
| 8110084 | MSX2     | -8.87491    | down | msh homeobox 2                                                       |
| 7901804 | INADL    | -8.988151   | down | InaD-like (Drosophila)                                               |
| 8056327 | GRB14    | -9.030322   | down | growth factor receptor-bound protein 14                              |
| 8138392 | AGR3     | -9.091893   | down | anterior gradient homolog 3 (Xenopus laevis)                         |
| 7908351 | PLA2G4A  | -9.095145   | down | phospholipase A2, group IVA (cytosolic, calcium-dependent)           |
| 8141140 | DLX5     | -9.135859   | down | distal-less homeobox 5                                               |
| 8058591 | ACADL    | -9.239931   | down | acyl-Coenzyme A dehydrogenase, long chain                            |
| 8095986 | ANXA3    | -9.265662   | down | annexin A3                                                           |
| 8116835 | GCNT2    | -9.311799   | down | glucosaminyl (N-acetyl) transferase 2, I-branching enzyme            |
| 7924058 | IRF6     | -9.35238    | down | interferon regulatory factor 6                                       |
| 8147766 | FZD6     | -9.432483   | down | frizzled homolog 6 (Drosophila)                                      |
| 7920123 | S100A10  | -9.572501   | down | S100 calcium binding protein A10                                     |
| 8091600 | PLCH1    | -9.612876   | down | phospholipase C, eta 1                                               |
| 7947274 | MPPED2   | -9.728099   | down | metallophosphoesterase domain containing 2                           |
| 8060897 | PLCB4    | -9.752255   | down | phospholipase C, beta 4                                              |
| 7948662 | SCGB1D4  | -9.776157   | down | secretoglobin, family 1D, member 4                                   |
| 7965357 | GALNT4   | -10.04099   | down | UDP-N-acetyl-alpha-D-galactosamine:polypeptide N-acetyltransferase 4 |
| 7936201 | C10orf79 | -10.095982  | down | chromosome 10 open reading frame 79                                  |
| 7923875 | C1orf186 | -10.1279955 | down | chromosome 1 open reading frame 186                                  |
| 8070603 | RSPH1    | -10.134895  | down | radial spoke head 1 homolog (Chlamydomonas)                          |
| 8060854 | PLCB1    | -10.241027  | down | phospholipase C, beta 1 (phosphoinositide-specific)                  |
| 8092169 | TNFSF10  | -10.284988  | down | tumor necrosis factor (ligand) superfamily, member 10                |
| 7940323 | MS4A8B   | -10.319971  | down | membrane-spanning 4-domains, subfamily A, member 8B                  |
| 8150978 | CA8      | -10.391066  | down | carbonic anhydrase VIII                                              |
| 8112342 | ADAMTS6  | -10.505463  | down | ADAM metalloproteinase with thrombospondin type 1 motifs 6           |
| 7962212 | PKP2     | -10.562353  | down | plakophilin 2                                                        |
| 8142270 | NRCAM    | -10.565403  | down | neuronal cell adhesion molecule                                      |
| 8141016 | TFPI2    | -10.709614  | down | tissue factor pathway inhibitor 2                                    |
| 8094441 | SLC34A2  | -11.24467   | down | solute carrier family 34 (sodium phosphate), member 2                |
| 8109926 | GABRP    | -11.333835  | down | gamma-aminobutyric acid (GABA) A receptor, pi                        |

Supplemental Table 1a  
eMSC vs. eEP

|         |                 |             |      |                                                            |
|---------|-----------------|-------------|------|------------------------------------------------------------|
| 8093278 | HGD LOC10013255 | -11.392487  | down | homogentisate 1,2-dioxygenase (homogentisate oxidase)      |
| 8033257 | C3              | -11.398919  | down | complement component 3                                     |
| 8155802 | GDA             | -11.573998  | down | guanine deaminase                                          |
| 8089851 | HGD LOC10013255 | -11.575508  | down | homogentisate 1,2-dioxygenase (homogentisate oxidase)      |
| 8135601 | MET             | -11.685722  | down | met proto-oncogene (hepatocyte growth factor receptor)     |
| 7926638 | ARMC3           | -11.688494  | down | armadillo repeat containing 3                              |
| 8140650 | SEMA3E          | -11.895387  | down | sema domain, immunoglobulin domain (Ig), short basic dc    |
| 8134351 | PPP1R9A         | -11.901248  | down | protein phosphatase 1, regulatory (inhibitor) subunit 9A   |
| 7957140 | LGR5            | -12.099313  | down | leucine-rich repeat-containing G protein-coupled receptor  |
| 8138466 | 7A5             | -12.235573  | down | putative binding protein 7a5                               |
| 8105908 | OCLN            | -13.0870495 | down | occludin                                                   |
| 7901175 | TSPAN1          | -13.152128  | down | tetraspanin 1                                              |
| 7940643 | ASRGL1          | -13.506869  | down | asparaginase like 1                                        |
| 7943413 | BIRC3           | -13.667165  | down | baculoviral IAP repeat-containing 3                        |
| 8096511 | BMPR1B          | -14.296102  | down | bone morphogenetic protein receptor, type IB               |
| 8129880 | PERP            | -14.731975  | down |                                                            |
| 8177498 | MARVELD2        | -14.753873  | down | MARVEL domain containing 2                                 |
| 8105899 | MARVELD2        | -14.817373  | down | MARVEL domain containing 2                                 |
| 7930498 | ACSL5           | -14.982017  | down | acyl-CoA synthetase long-chain family member 5             |
| 7908072 | LAMC2           | -15.611651  | down | laminin, gamma 2                                           |
| 8147351 | RBM35A          | -15.644743  | down | RNA binding motif protein 35A                              |
| 7996837 | CDH1            | -16.34036   | down | cadherin 1, type 1, E-cadherin (epithelial)                |
| 7952046 | MPZL2           | -16.450768  | down | myelin protein zero-like 2                                 |
| 7901765 | HOOK1           | -16.532856  | down | hook homolog 1 (Drosophila)                                |
| 8020779 | DSG2            | -16.554302  | down | desmoglein 2                                               |
| 8145293 | ADAM28          | -16.55486   | down | ADAM metallopeptidase domain 28                            |
| 8155930 | GCNT1           | -16.870516  | down | glucosaminyl (N-acetyl) transferase 1, core 2 (beta-1,6-N- |
| 8138381 | AGR2            | -16.921066  | down | anterior gradient homolog 2 (Xenopus laevis)               |
| 8041853 | EPCAM           | -16.945333  | down | tumor-associated calcium signal transducer 1               |
| 8100231 | TEC             | -16.959017  | down | tec protein tyrosine kinase                                |
| 8147891 | PKHD1L1         | -16.993866  | down | polycystic kidney and hepatic disease 1 (autosomal recess  |
| 8124196 | DCDC2           | -17.251457  | down | doublecortin domain containing 2                           |
| 8026490 | UCA1            | -17.358639  | down | urothelial cancer associated 1                             |

Supplemental Table 1a  
eMSC vs. eEP

|         |             |            |      |                                                             |
|---------|-------------|------------|------|-------------------------------------------------------------|
| 8091385 | CP          | -17.40289  | down | ceruloplasmin (ferroxidase)                                 |
| 7939314 | EHF         | -17.80539  | down | ets homologous factor                                       |
| 8091972 | EVI1   MDS1 | -18.425968 | down | ecotropic viral integration site 1   myelodysplasia syndron |
| 7940626 | SCGB2A1     | -19.25159  | down | secretoglobin, family 2A, member 1                          |
| 7910950 | KMO         | -20.43491  | down | kynurenine 3-monooxygenase (kynurenine 3-hydroxylase)       |
| 8066493 | SLPI        | -20.58204  | down | secretory leukocyte peptidase inhibitor                     |
| 7951217 | MMP7        | -20.736462 | down | matrix metallopeptidase 7 (matrilysin, uterine)             |
| 7903592 | KIAA1324    | -21.852682 | down |                                                             |
| 7964834 | CPM         | -22.44159  | down | carboxypeptidase M                                          |
| 8148040 | MAL2        | -22.674154 | down | mal, T-cell differentiation protein 2                       |
| 7940630 | SCGB1D2     | -23.479977 | down | secretoglobin, family 1D, member 2                          |
| 7937961 | MMP26       | -24.208563 | down | matrix metallopeptidase 26                                  |

## Supplemental Table 1b

eMSC vs. eEN

| Transcripts Cluster Id | Genesymbol | eMSC vs. eEN (Fold change) | Regulation | Gene description                                                   |
|------------------------|------------|----------------------------|------------|--------------------------------------------------------------------|
| 7921916                | RGS5       | 47.23495                   | up         | regulator of G-protein signaling 5                                 |
| 7934906                | ACTA2      | 45.75812                   | up         | actin, alpha 2, smooth muscle, aorta                               |
| 8104079                | FAT        | 36.248432                  | up         |                                                                    |
| 8059905                | COL6A3     | 34.23763                   | up         | collagen, type VI, alpha 3                                         |
| 7965403                | LUM        | 31.335707                  | up         | lumican                                                            |
| 8097692                | EDNRA      | 30.034561                  | up         | endothelin receptor type A                                         |
| 8102792                | PCDH18     | 29.849035                  | up         | protocadherin 18                                                   |
| 7965410                | DCN        | 29.76501                   | up         | decorin                                                            |
| 7961710                | ABCC9      | 29.663097                  | up         | ATP-binding cassette, sub-family C (CFTR/MRP), member 9            |
| 8146863                | SULF1      | 28.391926                  | up         | sulfatase 1                                                        |
| 8058857                | IGFBP5     | 26.116526                  | up         | insulin-like growth factor binding protein 5                       |
| 7961546                | EPS8       | 23.510674                  | up         | epidermal growth factor receptor pathway substrate 8               |
| 8091511                | P2RY14     | 22.952454                  | up         | purinergic receptor P2Y, G-protein coupled, 14                     |
| 8080511                | CACNA1D    | 22.879908                  | up         | calcium channel, voltage-dependent, L type, alpha 1D subunit       |
| 7921882                | OLFML2B    | 21.83506                   | up         | olfactomedin-like 2B                                               |
| 7949588                | CD248      | 19.478756                  | up         |                                                                    |
| 8097957                | GUCY1A3    | 19.417921                  | up         | guanylate cyclase 1, soluble, alpha 3                              |
| 7907222                | PRRX1      | 19.174202                  | up         | paired related homeobox 1                                          |
| 8115099                | PDGFRB     | 18.639086                  | up         | platelet-derived growth factor receptor, beta polypeptide          |
| 8104663                | CDH6       | 17.864933                  | up         | cadherin 6, type 2, K-cadherin (fetal kidney)                      |
| 8166079                | EGFL6      | 17.494146                  | up         | EGF-like-domain, multiple 6                                        |
| 8056363                | SLC38A11   | 16.859652                  | up         | solute carrier family 38, member 11                                |
| 7951437                | GUCY1A2    | 16.685898                  | up         | guanylate cyclase 1, soluble, alpha 2                              |
| 8097973                | GUCY1B3    | 16.090158                  | up         | guanylate cyclase 1, soluble, beta 3                               |
| 8151816                | GEM        | 15.776788                  | up         | GTP binding protein overexpressed in skeletal muscle               |
| 8144917                | LPL        | 15.521372                  | up         | lipoprotein lipase                                                 |
| 7951178                | TRPC6      | 15.367178                  | up         | transient receptor potential cation channel, subfamily C, member 6 |
| 8097080                | SYNPO2     | 15.359883                  | up         | synaptopodin 2                                                     |
| 7906900                | DDR2       | 15.290621                  | up         | discoidin domain receptor tyrosine kinase 2                        |
| 8098204                | CPE        | 15.182883                  | up         | carboxypeptidase E                                                 |
| 8147461                | SDC2       | 15.028996                  | up         | syndecan 2                                                         |
| 8007701                | HIGD1B     | 14.706791                  | up         | HIG1 domain family, member 1B                                      |

Supplemental Table 1b  
eMSC vs. eEN

|         |               |            |    |                                                             |
|---------|---------------|------------|----|-------------------------------------------------------------|
| 8055624 | ZEB2          | 14.311317  | up | zinc finger E-box binding homeobox 2                        |
| 8096875 | ENPEP         | 14.2372465 | up | glutamyl aminopeptidase (aminopeptidase A)                  |
| 8129573 | MOXD1         | 13.56968   | up | monooxygenase, DBH-like 1                                   |
| 8057506 | FRZB          | 13.360647  | up | frizzled-related protein                                    |
| 8134263 | COL1A2        | 13.313198  | up | collagen, type I, alpha 2                                   |
| 8123920 | ELOVL2        | 13.176566  | up | elongation of very long chain fatty acids (FEN1/Elo2, SUR4  |
| 8143144 | PTN           | 13.037138  | up | pleiotrophin (heparin binding growth factor 8, neurite gro  |
| 8095751 | DKFZP564O0823 | 12.9949045 | up |                                                             |
| 7952305 | LOC283155     | 12.399506  | up |                                                             |
| 8155864 | RORB          | 12.275504  | up | RAR-related orphan receptor B                               |
| 7997642 | CRISPLD2      | 12.252128  | up | cysteine-rich secretory protein LCCL domain containing 2    |
| 7951662 | CRYAB         | 12.230132  | up | crystallin, alpha B                                         |
| 7929388 | PLCE1         | 12.219574  | up | phospholipase C, epsilon 1                                  |
| 7961540 | RERG          | 12.134418  | up | RAS-like, estrogen-regulated, growth inhibitor              |
| 8113800 | FBN2          | 11.916635  | up | fibrillin 2 (congenital contractural arachnodactyly)        |
| 8046922 | COL3A1        | 11.78957   | up | collagen, type III, alpha 1 (Ehlers-Danlos syndrome type IV |
| 7928855 | BMPR1A        | 11.422957  | up | bone morphogenetic protein receptor, type IA                |
| 8110932 | SEMA5A        | 11.323213  | up | sema domain, seven thrombospondin repeats (type 1 and       |
| 8121949 | LAMA2         | 11.094107  | up | laminin, alpha 2 (merosin, congenital muscular dystrophy)   |
| 8042439 | ANTXR1        | 11.079105  | up | anthrax toxin receptor 1                                    |
| 7954293 | PDE3A         | 11.035723  | up | phosphodiesterase 3A, cGMP-inhibited                        |
| 7965873 | IGF1          | 10.920716  | up | insulin-like growth factor 1 (somatomedin C)                |
| 7938225 | OLFML1        | 10.762098  | up | olfactomedin-like 1                                         |
| 7913237 | CAMK2N1       | 10.6515    | up | calcium/calmodulin-dependent protein kinase II inhibitor    |
| 7936968 | ADAM12        | 10.611821  | up | ADAM metallopeptidase domain 12 (meltrin alpha)             |
| 8171172 | MXRA5         | 10.531265  | up | matrix-remodelling associated 5                             |
| 8123104 | FNDC1         | 10.323929  | up | fibronectin type III domain containing 1                    |
| 8163202 | SVEP1         | 10.249812  | up | sushi, von Willebrand factor type A, EGF and pentraxin do   |
| 8042356 | MEIS1         | 10.23689   | up | Meis homeobox 1                                             |
| 8131844 | GPNMB         | 9.938949   | up | glycoprotein (transmembrane) nmb                            |
| 8139212 | GLI3          | 9.927582   | up |                                                             |
| 8162394 | ASPN          | 9.877562   | up | asporin                                                     |
| 8146957 | PI15          | 9.732605   | up | peptidase inhibitor 15                                      |

## Supplemental Table 1b

eMSC vs. eEN

|         |                 |           |    |                                                                          |
|---------|-----------------|-----------|----|--------------------------------------------------------------------------|
| 8096176 | PTPN13          | 9.692788  | up | protein tyrosine phosphatase, non-receptor type 13 (APO-                 |
| 8078286 | RARB LOC100130  | 9.63166   | up | retinoic acid receptor, beta   hypothetical protein LOC10C               |
| 8046695 | ITGA4           | 9.619892  | up | integrin, alpha 4 (antigen CD49D, alpha 4 subunit of VLA-4               |
| 8081067 | HTR1F           | 9.538318  | up | 5-hydroxytryptamine (serotonin) receptor 1F                              |
| 8069689 | ADAMTS5         | 9.397467  | up | ADAM metalloproteinase with thrombospondin type 1 mo                     |
| 7947512 | DKFZP586H2123   | 9.289168  | up | regeneration associated muscle protease                                  |
| 8057486 | PDE1A           | 9.282751  | up | phosphodiesterase 1A, calmodulin-dependent                               |
| 7937952 | OR51E1          | 9.110945  | up | olfactory receptor, family 51, subfamily E, member 1                     |
| 8004545 | ATP1B2          | 9.052464  | up | ATPase, Na <sup>+</sup> /K <sup>+</sup> transporting, beta 2 polypeptide |
| 7953603 | C1S             | 9.013792  | up | complement component 1, s subcomponent                                   |
| 7939365 | FJX1            | 9.002764  | up | four jointed box 1 (Drosophila)                                          |
| 7903214 | LPPR4           | 8.723206  | up | plasticity related gene 1                                                |
| 7937772 | IGF2            | 8.615799  | up | insulin-like growth factor 2 (somatomedin A)                             |
| 7939341 | CD44            | 8.523537  | up |                                                                          |
| 7906878 | DDR2            | 8.414169  | up | discoidin domain receptor tyrosine kinase 2                              |
| 7984704 | NEO1            | 8.319982  | up | neogenin homolog 1 (chicken)                                             |
| 8105013 | EGFLAM          | 8.212859  | up | EGF-like, fibronectin type III and laminin G domains                     |
| 8145361 | NEFM            | 8.2084    | up | neurofilament, medium polypeptide 150kDa                                 |
| 8098263 | PALLD           | 8.1852    | up | palladin, cytoskeletal associated protein                                |
| 7906919 | RGS4            | 8.1137    | up | regulator of G-protein signaling 4                                       |
| 8016094 | GJC1            | 8.052961  | up | gap junction protein, gamma 1, 45kDa                                     |
| 8124166 | MBOAT1          | 8.048675  | up | membrane bound O-acyltransferase domain containing 1                     |
| 8041644 | PLEKHH2         | 7.7951865 | up | pleckstrin homology domain containing, family H (with M)                 |
| 8162404 | ECM2            | 7.788856  | up | extracellular matrix protein 2, female organ and adipocyte               |
| 8102532 | PDE5A           | 7.711654  | up | phosphodiesterase 5A, cGMP-specific                                      |
| 8073775 | FBLN1           | 7.449142  | up | fibulin 1                                                                |
| 8094301 | SLIT2           | 7.3818426 | up | slit homolog 2 (Drosophila)                                              |
| 8151686 | MMP16           | 7.366915  | up | matrix metalloproteinase 16 (membrane-inserted)                          |
| 7961702 | KCNJ8           | 7.298191  | up | potassium inwardly-rectifying channel, subfamily J, memb                 |
| 8151684 | C8orf57 LOC1001 | 7.176603  | up | chromosome 8 open reading frame 57   hypothetical LOC                    |
| 7957260 | GLIPR1          | 7.1683707 | up | GLI pathogenesis-related 1 (glioma)                                      |
| 7915229 | HEYL            | 7.158041  | up | hairy/enhancer-of-split related with YRPW motif-like                     |
| 8014768 | PLXDC1          | 7.0811033 | up | plexin domain containing 1                                               |



## Supplemental Table 1b

eMSC vs. eEN

|         |                  |           |    |                                                              |
|---------|------------------|-----------|----|--------------------------------------------------------------|
| 7981142 | CLMN             | 7.056515  | up | calmin (calponin-like, transmembrane)                        |
| 8148070 | COL14A1          | 7.034416  | up | collagen, type XIV, alpha 1                                  |
| 8057620 | COL5A2           | 7.0170074 | up | collagen, type V, alpha 2                                    |
| 8003667 | SERPINF1         | 7.0121284 | up | serpin peptidase inhibitor, clade F (alpha-2 antiplasmin, pi |
| 7976073 | FLRT2            | 6.989078  | up | fibronectin leucine rich transmembrane protein 2             |
| 7942135 | TMEM16A          | 6.9822736 | up | transmembrane protein 16A                                    |
| 8151512 | PAG1             | 6.8578835 | up | phosphoprotein associated with glycosphingolipid microd      |
| 8106573 | THBS4            | 6.828644  | up | thrombospondin 4                                             |
| 7980485 | DIO2             | 6.7945547 | up | deiodinase, iodothyronine, type II                           |
| 7943369 | TMEM133          | 6.7186975 | up | transmembrane protein 133                                    |
| 8129071 | FRK              | 6.7113934 | up | fyn-related kinase                                           |
| 8117054 | CAP2             | 6.628319  | up | CAP, adenylate cyclase-associated protein, 2 (yeast)         |
| 8152453 | TRPS1            | 6.623086  | up | trichorhinophalangeal syndrome I                             |
| 7972336 | DZIP1            | 6.6116743 | up | DAZ interacting protein 1                                    |
| 8127346 | RAB23            | 6.462106  | up |                                                              |
| 8139087 | SFRP4            | 6.3114643 | up | secreted frizzled-related protein 4                          |
| 8169541 | DOCK11           | 6.3096733 | up | dedicator of cytokinesis 11                                  |
| 8102950 | INPP4B           | 6.304812  | up | inositol polyphosphate-4-phosphatase, type II, 105kDa        |
| 8088979 | VGLL3            | 6.2984524 | up | vestigial like 3 (Drosophila)                                |
| 8095303 | LPHN3            | 6.257763  | up | latrophilin 3                                                |
| 8163257 | LPAR1            | 6.2531223 | up | lysophosphatidic acid receptor 1                             |
| 8174189 | TMSL8   MGC39900 | 6.2492805 | up | thymosin-like 8   thymosin beta15b                           |
| 7919815 | CTSK             | 6.1917715 | up | cathepsin K                                                  |
| 7972003 | KLF12            | 6.093723  | up | Kruppel-like factor 12                                       |
| 7919095 | NOTCH2           | 6.0813336 | up | Notch homolog 2 (Drosophila)                                 |
| 7927732 | ARID5B           | 6.0648923 | up | AT rich interactive domain 5B (MRF1-like)                    |
| 7938608 | SPON1            | 6.0363564 | up | spondin 1, extracellular matrix protein                      |
| 8162533 | PTCH1            | 5.9965944 | up | patched homolog 1 (Drosophila)                               |
| 8160040 | PTPRD            | 5.9447923 | up | protein tyrosine phosphatase, receptor type, D               |
| 8134098 | PFTK1            | 5.94471   | up | PFTAIRE protein kinase 1                                     |
| 7943349 | FLJ32810         | 5.9091783 | up |                                                              |
| 8106986 | RHOBTB3          | 5.832805  | up | Rho-related BTB domain containing 3                          |
| 8140840 | STEAP4           | 5.784329  | up | STEAP family member 4                                        |

## Supplemental Table 1b

eMSC vs. eEN

|         |          |           |    |                                                                      |
|---------|----------|-----------|----|----------------------------------------------------------------------|
| 8134869 | PCOLCE   | 5.767883  | up | procollagen C-endopeptidase enhancer                                 |
| 7969613 | GPC6     | 5.6282716 | up | glypican 6                                                           |
| 8083779 | SERPINI1 | 5.6154256 | up | serpin peptidase inhibitor, clade I (neuroserpin), member            |
| 8064539 | CPXM1    | 5.541311  | up | carboxypeptidase X (M14 family), member 1                            |
| 7951165 | PGR      | 5.532133  | up | progesterone receptor                                                |
| 8038319 | HRC      | 5.527701  | up | histidine rich calcium binding protein                               |
| 8023598 | RNF152   | 5.5246396 | up | ring finger protein 152                                              |
| 7979133 | NID2     | 5.523779  | up | nidogen 2 (osteonidogen)                                             |
| 8090098 | MYLK     | 5.4792576 | up | myosin light chain kinase                                            |
| 8144786 | SLC7A2   | 5.4684114 | up | solute carrier family 7 (cationic amino acid transporter, y+         |
| 7962274 | KIF21A   | 5.3772388 | up | kinesin family member 21A                                            |
| 8067157 | CBLN4    | 5.2411566 | up | cerebellin 4 precursor                                               |
| 8135734 | C7orf58  | 5.238458  | up | chromosome 7 open reading frame 58                                   |
| 8036473 | PPP1R14A | 5.1911993 | up | protein phosphatase 1, regulatory (inhibitor) subunit 14A            |
| 7933772 | ANK3     | 5.132228  | up | ankyrin 3, node of Ranvier (ankyrin G)                               |
| 8059413 | DOCK10   | 5.1230397 | up | dedicator of cytokinesis 10                                          |
| 8092654 | RPL39L   | 5.1128616 | up | ribosomal protein L39-like                                           |
| 7984079 | TPM1     | 5.105662  | up | tropomyosin 1 (alpha)                                                |
| 8122099 | ENPP1    | 5.082032  | up | ectonucleotide pyrophosphatase/phosphodiesterase 1                   |
| 8077323 | CNTN4    | 5.071732  | up | contactin 4                                                          |
| 8041383 | LTBP1    | 5.06609   | up | latent transforming growth factor beta binding protein 1             |
| 8177222 | CD24     | 5.051981  | up |                                                                      |
| 8108217 | TGFBI    | 5.0510535 | up | transforming growth factor, beta-induced, 68kDa                      |
| 8046461 | ZAK      | 5.0384645 | up | sterile alpha motif and leucine zipper containing kinase A $\bar{z}$ |
| 8170648 | BGN      | 5.0071235 | up | biglycan                                                             |
| 7999674 | MYH11    | 4.965221  | up | myosin, heavy chain 11, smooth muscle                                |
| 8115691 | SLIT3    | 4.961352  | up | slit homolog 3 (Drosophila)                                          |
| 7945680 | H19      | 4.9454303 | up |                                                                      |
| 7930857 | EMX2     | 4.9230056 | up | empty spiracles homeobox 2                                           |
| 8121850 | HEY2     | 4.9220033 | up | hairy/enhancer-of-split related with YRPW motif 2                    |
| 8141035 | SGCE     | 4.904978  | up | sarcoglycan, epsilon                                                 |
| 8050766 | ADCY3    | 4.894349  | up | adenylate cyclase 3                                                  |
| 8057959 | PGAP1    | 4.8688436 | up | post-GPI attachment to proteins 1                                    |

Supplemental Table 1b  
eMSC vs. eEN

|         |            |           |    |                                                          |
|---------|------------|-----------|----|----------------------------------------------------------|
| 8083968 | NLGN1      | 4.8533993 | up | neuroligin 1                                             |
| 8022927 | SLC39A6    | 4.843764  | up | solute carrier family 39 (zinc transporter), member 6    |
| 7965941 | GLT8D2     | 4.8325496 | up | glycosyltransferase 8 domain containing 2                |
| 8122843 | ESR1       | 4.8266234 | up | estrogen receptor 1                                      |
| 7964660 | AVPR1A     | 4.8187075 | up | arginine vasopressin receptor 1A                         |
| 7944082 | TAGLN      | 4.7966576 | up | transgelin                                               |
| 8095854 | 11-Sep     | 4.78431   | up | septin 11                                                |
| 8058091 | SATB2      | 4.764162  | up | SATB homeobox 2                                          |
| 7906307 | KIRREL     | 4.7616444 | up | kin of IRRE like (Drosophila)                            |
| 8080964 | GLT8D4     | 4.755065  | up | glycosyltransferase 8 domain containing 4                |
| 8133155 | TPST1      | 4.754045  | up | tyrosylprotein sulfotransferase 1                        |
| 7976814 | SNORD114-2 | 4.734532  | up | small nucleolar RNA, C/D box 114-2                       |
| 7950578 | PAK1       | 4.706512  | up | p21/Cdc42/Rac1-activated kinase 1 (STE20 homolog, yeas   |
| 8121588 | DSE        | 4.685392  | up | dermatan sulfate epimerase                               |
| 8056343 | COBLL1     | 4.663319  | up | COBL-like 1                                              |
| 8081431 | ALCAM      | 4.6632967 | up | activated leukocyte cell adhesion molecule               |
| 8172708 | NUDT11     | 4.654615  | up | nudix (nucleoside diphosphate linked moiety X)-type moti |
| 7932584 | PRTFDC1    | 4.6450186 | up | phosphoribosyl transferase domain containing 1           |
| 8072876 | LGALS1     | 4.6423836 | up | lectin, galactoside-binding, soluble, 1 (galectin 1)     |
| 7936439 | AFAP1L2    | 4.621939  | up | actin filament associated protein 1-like 2               |
| 8062312 | MYL9       | 4.610285  | up | myosin, light chain 9, regulatory                        |
| 8006214 | CENTA2     | 4.5857534 | up | centaurin, alpha 2                                       |
| 7905220 | ECM1       | 4.532341  | up | extracellular matrix protein 1                           |
| 8105596 | RGS7BP     | 4.509744  | up | regulator of G-protein signaling 7 binding protein       |
| 7974697 | DAAM1      | 4.488054  | up | dishevelled associated activator of morphogenesis 1      |
| 8016646 | COL1A1     | 4.479305  | up | collagen, type I, alpha 1                                |
| 8008547 | TOM1L1     | 4.4633327 | up | target of myb1 (chicken)-like 1                          |
| 7980891 | TC2N       | 4.455918  | up | tandem C2 domains, nuclear                               |
| 8116418 | GFPT2      | 4.4456887 | up | glutamine-fructose-6-phosphate transaminase 2            |
| 8039607 | PEG3 ZIM2  | 4.4400783 | up | paternally expressed 3   zinc finger, imprinted 2        |
| 8085665 | RFTN1      | 4.4065757 | up | raftlin, lipid raft linker 1                             |
| 7934936 | SLC16A12   | 4.388173  | up | solute carrier family 16, member 12 (monocarboxylic acid |
| 8021685 | CCDC102B   | 4.3765574 | up | coiled-coil domain containing 102B                       |

## Supplemental Table 1b

eMSC vs. eEN

|         |            |           |    |                                                              |
|---------|------------|-----------|----|--------------------------------------------------------------|
| 7938231 | PPFIBP2    | 4.370844  | up | PTPRF interacting protein, binding protein 2 (liprin beta 2) |
| 7936529 | KIAA1598   | 4.3642945 | up |                                                              |
| 8063444 | TSHZ2      | 4.323279  | up | teashirt zinc finger homeobox 2                              |
| 7902127 | SGIP1      | 4.319416  | up | SH3-domain GRB2-like (endophilin) interacting protein 1      |
| 7970954 | DCLK1      | 4.3130727 | up | doublecortin-like kinase 1                                   |
| 8122807 | AKAP12     | 4.3054657 | up | A kinase (PRKA) anchor protein (gravin) 12                   |
| 7952641 | RICS       | 4.3053746 | up | Rho GTPase-activating protein                                |
| 8155673 | PIP5K1B    | 4.2810535 | up | phosphatidylinositol-4-phosphate 5-kinase, type I, beta      |
| 7976810 | SNORD113-3 | 4.2544303 | up | small nucleolar RNA, C/D box 113-3                           |
| 8047926 | MAP2       | 4.251845  | up | microtubule-associated protein 2                             |
| 7904158 | OLFML3     | 4.2326355 | up | olfactomedin-like 3                                          |
| 8045470 | THSD7B     | 4.130927  | up | thrombospondin, type I, domain containing 7B                 |
| 8121712 | SLC35F1    | 4.111412  | up | solute carrier family 35, member F1                          |
| 8150509 | PLAT       | 4.0975375 | up | plasminogen activator, tissue                                |
| 7974109 | LRFN5      | 4.0496655 | up | leucine rich repeat and fibronectin type III domain contain  |
| 8144742 | EFHA2      | 4.0451875 | up | EF-hand domain family, member A2                             |
| 7974689 | DACT1      | 4.0416746 | up | dapper, antagonist of beta-catenin, homolog 1 (Xenopus l     |
| 8138765 | HOXA11     | 4.037757  | up | homeobox A11                                                 |
| 7929012 | STAMBPL1   | 4.0350666 | up | STAM binding protein-like 1                                  |
| 8097717 | ARHGAP10   | 4.0237565 | up | Rho GTPase activating protein 10                             |
| 8002969 | MAF        | 4.0191236 | up | v-maf musculoaponeurotic fibrosarcoma oncogene homol         |
| 8101788 | UNC5C      | 3.9947023 | up | unc-5 homolog C (C. elegans)                                 |
| 8072015 | ADRBK2     | 3.9935703 | up | adrenergic, beta, receptor kinase 2                          |
| 8023727 | DSEL       | 3.990228  | up | dermatan sulfate epimerase-like                              |
| 8088919 | ROBO1      | 3.9735143 | up | roundabout, axon guidance receptor, homolog 1 (Drosopl       |
| 8147573 | OSR2       | 3.9680173 | up | odd-skipped related 2 (Drosophila)                           |
| 7997504 | CDH13      | 3.9633517 | up | cadherin 13, H-cadherin (heart)                              |
| 8068651 | PCP4       | 3.959489  | up | Purkinje cell protein 4                                      |
| 8089544 | CCDC80     | 3.9539561 | up | coiled-coil domain containing 80                             |
| 8020110 | RAB31      | 3.9514105 | up |                                                              |
| 8138067 | PSCD3      | 3.932177  | up | pleckstrin homology, Sec7 and coiled-coil domains 3          |
| 8097991 | TDO2       | 3.9284165 | up | tryptophan 2,3-dioxygenase                                   |
| 7926875 | BAMBI      | 3.919703  | up | BMP and activin membrane-bound inhibitor homolog (Xe         |

## Supplemental Table 1b

eMSC vs. eEN

|         |          |           |    |                                                                                      |
|---------|----------|-----------|----|--------------------------------------------------------------------------------------|
| 8149413 | DLC1     | 3.9180992 | up | deleted in liver cancer 1                                                            |
| 8161964 | FRMD3    | 3.9115689 | up | FERM domain containing 3                                                             |
| 8047272 | LOC26010 | 3.902485  | up | viral DNA polymerase-transactivated protein 6                                        |
| 8140579 | CACNA2D1 | 3.9015455 | up | calcium channel, voltage-dependent, alpha 2/delta subunit                            |
| 7934997 | PPP1R3C  | 3.9014618 | up | protein phosphatase 1, regulatory (inhibitor) subunit 3C                             |
| 8020551 | LAMA3    | 3.8835678 | up | laminin, alpha 3                                                                     |
| 8081288 | TMEM45A  | 3.8682086 | up | transmembrane protein 45A                                                            |
| 7950810 | SYTL2    | 3.8661385 | up | synaptotagmin-like 2                                                                 |
| 7927681 | BICC1    | 3.8657637 | up | bicaudal C homolog 1 (Drosophila)                                                    |
| 8057887 | STK17B   | 3.8596969 | up | serine/threonine kinase 17b                                                          |
| 8044021 | IL1RL1   | 3.8557804 | up | interleukin 1 receptor-like 1                                                        |
| 8042283 | HSPC159  | 3.8529503 | up | galectin-related protein                                                             |
| 8161044 | TPM2     | 3.8516884 | up | tropomyosin 2 (beta)                                                                 |
| 8127767 | ELOVL4   | 3.8397572 | up | elongation of very long chain fatty acids (FEN1/Elo2, SUR4)                          |
| 8047248 | PLCL1    | 3.833105  | up | phospholipase C-like 1                                                               |
| 8096733 | SGMS2    | 3.7873197 | up | sphingomyelin synthase 2                                                             |
| 8171205 | NLGN4X   | 3.7653747 | up | neuroligin 4, X-linked                                                               |
| 8091867 | BCHE     | 3.7582614 | up | butyrylcholinesterase                                                                |
| 8102468 | PRSS12   | 3.7483747 | up | protease, serine, 12 (neurotrypsin, motopsin)                                        |
| 8017133 | FAM33A   | 3.7368617 | up | family with sequence similarity 33, member A                                         |
| 7925320 | NID1     | 3.720456  | up | nidogen 1                                                                            |
| 7948900 | SNORD30  | 3.7075722 | up | small nucleolar RNA, C/D box 30                                                      |
| 7976012 | NRXN3    | 3.6740665 | up | neurexin 3                                                                           |
| 8111387 | ADAMTS12 | 3.6626337 | up | ADAM metalloproteinase with thrombospondin type 1 motif 12                           |
| 8148448 | KHDRBS3  | 3.6561997 | up | KH domain containing, RNA binding, signal transduction activator                     |
| 8046333 | CYBRD1   | 3.6466136 | up | cytochrome b reductase 1                                                             |
| 8149551 | PSD3     | 3.6432562 | up | pleckstrin and Sec7 domain containing 3                                              |
| 8120468 | BAI3     | 3.6399636 | up | brain-specific angiogenesis inhibitor 3                                              |
| 7972557 | EBI2     | 3.6214726 | up | Epstein-Barr virus induced gene 2 (lymphocyte-specific G protein-coupled receptor 2) |
| 8156905 | TMEFF1   | 3.6193907 | up | transmembrane protein with EGF-like and two follistatin-like domains                 |
| 8155192 | C9orf19  | 3.61413   | up | chromosome 9 open reading frame 19                                                   |
| 7964665 | DPY19L2  | 3.612895  | up | dpy-19-like 2 (C. elegans)                                                           |
| 8124380 | HIST1H1A | 3.606896  | up | histone cluster 1, H1a                                                               |

## Supplemental Table 1b

eMSC vs. eEN

|         |               |           |    |                                                               |
|---------|---------------|-----------|----|---------------------------------------------------------------|
| 8115543 | EBF1          | 3.6040437 | up | early B-cell factor 1                                         |
| 8081362 | CEP97         | 3.599014  | up | centrosomal protein 97kDa                                     |
| 8128284 | EPHA7         | 3.584445  | up | EPH receptor A7                                               |
| 8083166 | TRPC1         | 3.5751057 | up | transient receptor potential cation channel, subfamily C, r   |
| 8062251 | EPB41L1       | 3.5747728 | up | erythrocyte membrane protein band 4.1-like 1                  |
| 7957386 | ACSS3         | 3.5605772 | up | acyl-CoA synthetase short-chain family member 3               |
| 8152119 | NCALD         | 3.5536115 | up | neurocalcin delta                                             |
| 7961900 | ITPR2         | 3.5422564 | up | inositol 1,4,5-triphosphate receptor, type 2                  |
| 8042788 | ACTG2         | 3.5236855 | up | actin, gamma 2, smooth muscle, enteric                        |
| 8108301 | KIF20A        | 3.519362  | up | kinesin family member 20A                                     |
| 8151768 | RUNX1T1       | 3.492504  | up | runt-related transcription factor 1; translocated to, 1 (cycl |
| 8063437 | TSHZ2         | 3.4864159 | up | teashirt zinc finger homeobox 2                               |
| 8174670 | RP13-347D8.3  | 3.483375  | up | KIAA1210 protein                                              |
| 7966749 | TESC          | 3.4825978 | up | tescalcin                                                     |
| 7989199 | ALDH1A2       | 3.4822736 | up | aldehyde dehydrogenase 1 family, member A2                    |
| 8112940 | SSBP2         | 3.477196  | up | single-stranded DNA binding protein 2                         |
| 8014974 | TOP2A         | 3.4689386 | up | topoisomerase (DNA) II alpha 170kDa                           |
| 7953428 | CD4           | 3.4570253 | up |                                                               |
| 8157153 | PALM2-AKAP2   | 3.4555535 | up |                                                               |
| 8162940 | ABCA1         | 3.4461312 | up | ATP-binding cassette, sub-family A (ABC1), member 1           |
| 8005661 | SPECC1        | 3.442493  | up | sperm antigen with calponin homology and coiled-coil doi      |
| 7991234 | MFGE8         | 3.428283  | up | milk fat globule-EGF factor 8 protein                         |
| 8029006 | AXL           | 3.426668  | up |                                                               |
| 7918379 | GSTM3         | 3.4261594 | up | glutathione S-transferase M3 (brain)                          |
| 7946589 | MRV1          | 3.4061584 | up | murine retrovirus integration site 1 homolog                  |
| 7935613 | HPSE2         | 3.4025066 | up | heparanase 2                                                  |
| 7903777 | GSTM5         | 3.3880713 | up | glutathione S-transferase M5                                  |
| 7909789 | TGFB2         | 3.3870914 | up | transforming growth factor, beta 2                            |
| 8171248 | KAL1          | 3.384263  | up | Kallmann syndrome 1 sequence                                  |
| 7917728 | FAM69A RPL5   | 3.3799293 | up | family with sequence similarity 69, member A   ribosomal      |
| 8138454 | TWISTNB       | 3.3797245 | up | TWIST neighbor                                                |
| 8150428 | SFRP1         | 3.3757613 | up | secreted frizzled-related protein 1                           |
| 7956551 | GEFT SLC26A10 | 3.3750367 | up | RhoA/RAC/CDC42 exchange factor   solute carrier family :      |

## Supplemental Table 1b

eMSC vs. eEN

|         |          |           |    |                                                                    |
|---------|----------|-----------|----|--------------------------------------------------------------------|
| 7980908 | FBLN5    | 3.3733735 | up | fibulin 5                                                          |
| 8048749 | KCNE4    | 3.3728895 | up | potassium voltage-gated channel, Isk-related family, mem           |
| 7972826 | C13orf29 | 3.366061  | up | chromosome 13 open reading frame 29                                |
| 8150698 | SNAI2    | 3.3646626 | up | snail homolog 2 (Drosophila)                                       |
| 7902808 | HS2ST1   | 3.3584845 | up | heparan sulfate 2-O-sulfotransferase 1                             |
| 8171684 | SH3KBP1  | 3.3543346 | up | SH3-domain kinase binding protein 1                                |
| 7923608 | REN      | 3.348094  | up | renin                                                              |
| 7943398 | YAP1     | 3.3402932 | up | Yes-associated protein 1, 65kDa                                    |
| 8174654 | KLHL13   | 3.337083  | up | kelch-like 13 (Drosophila)                                         |
| 8048026 | CPS1     | 3.3313432 | up | carbamoyl-phosphate synthetase 1, mitochondrial                    |
| 7912157 | ERRFI1   | 3.3299026 | up | ERBB receptor feedback inhibitor 1                                 |
| 7933488 | C10orf72 | 3.323547  | up | chromosome 10 open reading frame 72                                |
| 8101587 | MAPK10   | 3.317817  | up | mitogen-activated protein kinase 10                                |
| 8119357 | DAAM2    | 3.317061  | up | dishevelled associated activator of morphogenesis 2                |
| 8162908 | GRIN3A   | 3.2837965 | up | glutamate receptor, ionotropic, N-methyl-D-aspartate 3A            |
| 8069269 | COL6A1   | 3.2749417 | up | collagen, type VI, alpha 1                                         |
| 8123651 | TUBB2B   | 3.2702975 | up | tubulin, beta 2B                                                   |
| 8105585 | RNF180   | 3.261381  | up | ring finger protein 180                                            |
| 7954481 | SSPN     | 3.2600975 | up | sarcospan (Kras oncogene-associated gene)                          |
| 8109576 | THG1L    | 3.2574933 | up | tRNA-histidine guanylyltransferase 1-like ( <i>S. cerevisiae</i> ) |
| 8071758 | MMP11    | 3.249196  | up | matrix metalloproteinase 11 (stromelysin 3)                        |
| 8140955 | CDK6     | 3.244794  | up | cyclin-dependent kinase 6                                          |
| 7945991 | OR51E2   | 3.2375174 | up | olfactory receptor, family 51, subfamily E, member 2               |
| 8007420 | AOC3     | 3.2192302 | up | amine oxidase, copper containing 3 (vascular adhesion pro          |
| 8151999 | RGS22    | 3.1947818 | up | regulator of G-protein signaling 22                                |
| 7933872 | EGR2     | 3.1921988 | up | early growth response 2 (Krox-20 homolog, Drosophila)              |
| 8089112 | FILIP1L  | 3.18969   | up | filamin A interacting protein 1-like                               |
| 7986293 | MCTP2    | 3.1765914 | up | multiple C2 domains, transmembrane 2                               |
| 8123744 | F13A1    | 3.1709926 | up | coagulation factor XIII, A1 polypeptide                            |
| 7901969 | ROR1     | 3.1397932 | up | receptor tyrosine kinase-like orphan receptor 1                    |
| 8051762 | SLC8A1   | 3.1365602 | up | solute carrier family 8 (sodium/calcium exchanger), mem            |
| 8126428 | TRERF1   | 3.1314447 | up | transcriptional regulating factor 1                                |
| 8099612 | GPR125   | 3.1227958 | up | G protein-coupled receptor 125                                     |

## Supplemental Table 1b

eMSC vs. eEN

|         |                 |           |    |                                                            |
|---------|-----------------|-----------|----|------------------------------------------------------------|
| 8046048 | FAM130A2        | 3.1082575 | up | family with sequence similarity 130, member A2             |
| 7946401 | ST5             | 3.0977676 | up | suppression of tumorigenicity 5                            |
| 8168749 | SRPX2           | 3.0941334 | up | sushi-repeat-containing protein, X-linked 2                |
| 8103951 | ACSL1           | 3.0771797 | up | acyl-CoA synthetase long-chain family member 1             |
| 7943051 | NAALAD2         | 3.0476773 | up | N-acetylated alpha-linked acidic dipeptidase 2             |
| 8017867 | FAM20A          | 3.043881  | up | family with sequence similarity 20, member A               |
| 7954065 | GPRC5A          | 3.0386074 | up | G protein-coupled receptor, family C, group 5, member A    |
| 7954245 | PLEKHA5         | 3.0319355 | up | pleckstrin homology domain containing, family A member     |
| 8086120 | DCLK3           | 3.028032  | up | doublecortin-like kinase 3                                 |
| 7900340 | BMP8A           | 3.0278468 | up | bone morphogenetic protein 8a                              |
| 7905329 | MLLT11          | 3.0258007 | up | myeloid/lymphoid or mixed-lineage leukemia (trithorax ho   |
| 8129363 | HDDC2           | 3.021133  | up | HD domain containing 2                                     |
| 8131583 | BZW2            | 3.0126538 | up | basic leucine zipper and W2 domains 2                      |
| 8144322 | MYOM2           | 3.0122378 | up | myomesin (M-protein) 2, 165kDa                             |
| 8080938 | MITF            | 3.0071645 | up | microphthalmia-associated transcription factor             |
| 8045336 | GPR39           | 3.00664   | up | G protein-coupled receptor 39                              |
| 8140668 | SEMA3A          | 2.9931774 | up | sema domain, immunoglobulin domain (Ig), short basic dc    |
| 8129985 | PLAGL1          | 2.9928339 | up | pleiomorphic adenoma gene-like 1                           |
| 8167006 | RP2             | 2.9866333 | up | retinitis pigmentosa 2 (X-linked recessive)                |
| 8056943 | KIAA1715        | 2.9834282 | up |                                                            |
| 7989146 | MNS1            | 2.9832191 | up | meiosis-specific nuclear structural 1                      |
| 8117120 | ID4             | 2.9772477 | up | inhibitor of DNA binding 4, dominant negative helix-loop-l |
| 8022338 | DISP2 LOC728211 | 2.9757988 | up | dispatched homolog 2 (Drosophila)   hypothetical LOC728    |
| 7909841 | MARK1           | 2.971652  | up | MAP/microtubule affinity-regulating kinase 1               |
| 8045499 | HNMT            | 2.968367  | up | histamine N-methyltransferase                              |
| 8077366 | LRRN1           | 2.9637413 | up | leucine rich repeat neuronal 1                             |
| 8017885 | ABCA8           | 2.9634101 | up | ATP-binding cassette, sub-family A (ABC1), member 8        |
| 7956301 | LRP1            | 2.9575622 | up | low density lipoprotein-related protein 1 (alpha-2-macrog  |
| 7940565 | FADS2           | 2.9520428 | up | fatty acid desaturase 2                                    |
| 7982366 | SCG5            | 2.9469135 | up | secretogranin V (7B2 protein)                              |
| 8103630 | SH3RF1          | 2.9422271 | up | SH3 domain containing ring finger 1                        |
| 8137670 | PDGFA           | 2.9413345 | up | platelet-derived growth factor alpha polypeptide           |
| 8047596 | ALS2CR16        | 2.935519  | up | amyotrophic lateral sclerosis 2 (juvenile) chromosome reg  |



## Supplemental Table 1b

eMSC vs. eEN

|         |                 |           |    |                                                                |
|---------|-----------------|-----------|----|----------------------------------------------------------------|
| 7950555 | LRRC32          | 2.9271216 | up | leucine rich repeat containing 32                              |
| 7972428 | OXGR1           | 2.9244385 | up | oxoglutarate (alpha-ketoglutarate) receptor 1                  |
| 8131666 | ITGB8           | 2.922994  | up | integrin, beta 8                                               |
| 8102415 | CAMK2D          | 2.9216201 | up | calcium/calmodulin-dependent protein kinase (CaM kinase)       |
| 7930380 | ADD3            | 2.9169872 | up | adducin 3 (gamma)                                              |
| 8056890 | CHN1            | 2.9026885 | up | chimerin (chimaerin) 1                                         |
| 8046906 | GULP1           | 2.8972085 | up | GULP, engulfment adaptor PTB domain containing 1               |
| 8143397 | DENND2A         | 2.8871655 | up | DENN/MADD domain containing 2A                                 |
| 8168179 | DLG3            | 2.884816  | up | discs, large homolog 3 (neuroendocrine-dlg, Drosophila)        |
| 8112107 | PPAP2A          | 2.8839638 | up | phosphatidic acid phosphatase type 2A                          |
| 8009301 | PRKCA           | 2.878565  | up | protein kinase C, alpha                                        |
| 8169389 | PAK3            | 2.872287  | up | p21 (CDKN1A)-activated kinase 3                                |
| 7980616 | PTPN21          | 2.8644822 | up | protein tyrosine phosphatase, non-receptor type 21             |
| 7971150 | LHFP            | 2.863706  | up | lipoma HMGIC fusion partner                                    |
| 8152280 | LRP12           | 2.8510003 | up | low density lipoprotein-related protein 12                     |
| 7909610 | ATF3            | 2.8471522 | up | activating transcription factor 3                              |
| 8098441 | ODZ3            | 2.8438275 | up | odz, odd Oz/ten-m homolog 3 (Drosophila)                       |
| 8127201 | COL21A1         | 2.8356504 | up | collagen, type XXI, alpha 1                                    |
| 8083090 | ZBTB38          | 2.832253  | up | zinc finger and BTB domain containing 38                       |
| 7924996 | C1orf198        | 2.8220685 | up | chromosome 1 open reading frame 198                            |
| 7986383 | IGF1R           | 2.8219955 | up | insulin-like growth factor 1 receptor                          |
| 8055688 | RND3            | 2.8200233 | up | Rho family GTPase 3                                            |
| 8149248 | LRLE1 LOC100127 | 2.8180451 | up | liver-related low express protein 1   similar to liver-related |
| 8021047 | SETBP1          | 2.8120148 | up | SET binding protein 1                                          |
| 7953135 | TULP3           | 2.8054123 | up | tubby like protein 3                                           |
| 7989069 | PYGO1           | 2.8017983 | up | pygopus homolog 1 (Drosophila)                                 |
| 7958253 | OCC-1           | 2.7992046 | up | overexpressed in colon carcinoma-1                             |
| 8127646 | FILIP1          | 2.7923725 | up | filamin A interacting protein 1                                |
| 8166289 | CDKL5           | 2.7921937 | up | cyclin-dependent kinase-like 5                                 |
| 8107673 | GRAMD3          | 2.7904227 | up | GRAM domain containing 3                                       |
| 8113433 | EFNA5           | 2.7800963 | up | ephrin-A5                                                      |
| 8095080 | PDGFRA          | 2.7781653 | up | platelet-derived growth factor receptor, alpha polypeptide     |
| 8059470 | IRS1            | 2.7756164 | up | insulin receptor substrate 1                                   |

## Supplemental Table 1b

eMSC vs. eEN

|         |                 |           |    |                                                                            |
|---------|-----------------|-----------|----|----------------------------------------------------------------------------|
| 7930714 | ATRNL1          | 2.7731562 | up | attractin-like 1                                                           |
| 8088803 | EIF4E3          | 2.772994  | up | eukaryotic translation initiation factor 4E family member 3                |
| 7917875 | F3              | 2.7654035 | up | coagulation factor III (thromboplastin, tissue factor)                     |
| 8144699 | LRLE1 LOC100127 | 2.7638366 | up | liver-related low express protein 1   similar to liver-related protein 1   |
| 8129120 | C6orf189        | 2.759859  | up | chromosome 6 open reading frame 189                                        |
| 8019912 | EMILIN2         | 2.7546537 | up | elastin microfibril interfacier 2                                          |
| 8102440 | ARSJ            | 2.7532172 | up | arylsulfatase family, member J                                             |
| 8042211 | B3GNT2          | 2.7523675 | up | UDP-GlcNAc:betaGal beta-1,3-N-acetylglucosaminyltransferase 2              |
| 7982757 | CASC5           | 2.752337  | up | cancer susceptibility candidate 5                                          |
| 7968015 | TNFRSF19        | 2.7495298 | up | tumor necrosis factor receptor superfamily, member 19                      |
| 8100154 | CORIN           | 2.743392  | up | corin, serine peptidase                                                    |
| 8152617 | HAS2            | 2.7433486 | up | hyaluronan synthase 2                                                      |
| 8083749 | PPM1L           | 2.7413507 | up | protein phosphatase 1 (formerly 2C)-like 1                                 |
| 8027650 | UBA2            | 2.7317104 | up | ubiquitin-like modifier activating enzyme 2                                |
| 8105828 | CCNB1           | 2.7223308 | up | cyclin B1                                                                  |
| 8151756 | TMEM55A         | 2.7193038 | up | transmembrane protein 55A                                                  |
| 7965040 | PHLDA1          | 2.710015  | up | pleckstrin homology-like domain, family A, member 1                        |
| 8077376 | ITPR1           | 2.709102  | up | inositol 1,4,5-triphosphate receptor, type 1                               |
| 7986329 | NR2F2           | 2.7087255 | up | nuclear receptor subfamily 2, group F, member 2                            |
| 7942417 | ARHGEF17        | 2.708075  | up | Rho guanine nucleotide exchange factor (GEF) 17                            |
| 7901272 | CYP4X1          | 2.7067106 | up | cytochrome P450, family 4, subfamily X, polypeptide 1                      |
| 8107823 | ADAMTS19        | 2.7054582 | up | ADAM metalloproteinase with thrombospondin type 1 motifs 19                |
| 8113220 | ELL2            | 2.703414  | up | elongation factor, RNA polymerase II, 2                                    |
| 8149555 | PSD3            | 2.7029612 | up | pleckstrin and Sec7 domain containing 3                                    |
| 8052654 | PELI1           | 2.7011569 | up | pellino homolog 1 (Drosophila)                                             |
| 8148317 | MYC LOC1001305  | 2.6977782 | up | v-myc myelocytomatosis viral oncogene homolog (avian)                      |
| 8112857 | MTX3            | 2.6957195 | up | metaxin 3                                                                  |
| 8156848 | NR4A3           | 2.6942282 | up | nuclear receptor subfamily 4, group A, member 3                            |
| 7988467 | FBN1            | 2.6930206 | up | fibrillin 1                                                                |
| 8088848 | PDZRN3          | 2.69051   | up | PDZ domain containing RING finger 3                                        |
| 7938485 | MICAL2          | 2.6892972 | up | microtubule associated monooxygenase, calponin and LIM domain containing 2 |
| 8045289 | RHOQ            | 2.6891403 | up | ras homolog gene family, member Q                                          |
| 7983228 | MAP1A           | 2.6882517 | up | microtubule-associated protein 1A                                          |

## Supplemental Table 1b

eMSC vs. eEN

|         |           |           |    |                                                                  |
|---------|-----------|-----------|----|------------------------------------------------------------------|
| 7920271 | S100A4    | 2.6859303 | up | S100 calcium binding protein A4                                  |
| 7929032 | FAS       | 2.6828437 | up | Fas (TNF receptor superfamily, member 6)                         |
| 8119525 | HCRP1     | 2.6790376 | up |                                                                  |
| 8048995 | ITM2C     | 2.6750944 | up | integral membrane protein 2C                                     |
| 7957861 | TMEM16D   | 2.6732206 | up | transmembrane protein 16D                                        |
| 8156060 | TLE4      | 2.6636274 | up | transducin-like enhancer of split 4 (E(sp1) homolog, Drosophila) |
| 7991406 | PRC1      | 2.6612387 | up | protein regulator of cytokinesis 1                               |
| 7916669 | DOCK7     | 2.6585746 | up | dedicator of cytokinesis 7                                       |
| 7943562 | ELMOD1    | 2.6559858 | up | ELMO/CED-12 domain containing 1                                  |
| 7991186 | NTRK3     | 2.6531844 | up | neurotrophic tyrosine kinase, receptor, type 3                   |
| 8136248 | MEST      | 2.6519818 | up | mesoderm specific transcript homolog (mouse)                     |
| 8025918 | CNN1      | 2.6518307 | up | calponin 1, basic, smooth muscle                                 |
| 8026300 | CD97      | 2.6517289 | up |                                                                  |
| 7954997 | TMEM16F   | 2.6354482 | up | transmembrane protein 16F                                        |
| 8168146 | KIF4A     | 2.633436  | up | kinesin family member 4A                                         |
| 8088180 | WNT5A     | 2.6298406 | up | wingless-type MMTV integration site family, member 5A            |
| 8105778 | PIK3R1    | 2.6292005 | up | phosphoinositide-3-kinase, regulatory subunit 1 (alpha)          |
| 7990632 | SGK269    | 2.6231337 | up | NKF3 kinase family member                                        |
| 7963946 | MMP19     | 2.6205974 | up | matrix metalloproteinase 19                                      |
| 8130867 | THBS2     | 2.619607  | up | thrombospondin 2                                                 |
| 8055606 | GTDC1     | 2.6185977 | up | glycosyltransferase-like domain containing 1                     |
| 8154381 | C9orf150  | 2.617026  | up | chromosome 9 open reading frame 150                              |
| 8107814 | ISOC1     | 2.616063  | up | isochorismatase domain containing 1                              |
| 7933010 | PARD3     | 2.614539  | up | par-3 partitioning defective 3 homolog (C. elegans)              |
| 8137485 | DPP6      | 2.613813  | up | dipeptidyl-peptidase 6                                           |
| 8170538 | GABRQ     | 2.6074514 | up | gamma-aminobutyric acid (GABA) receptor, theta                   |
| 8117045 | RBM24     | 2.6019156 | up | RNA binding motif protein 24                                     |
| 7958620 | IFT81     | 2.5911078 | up | intraflagellar transport 81 homolog (Chlamydomonas)              |
| 7909603 | NENF      | 2.5901713 | up | neuron derived neurotrophic factor                               |
| 8094911 | ATP10D    | 2.585996  | up | ATPase, class V, type 10D                                        |
| 8092520 | LOC285382 | 2.5857673 | up | hypothetical gene supported by AK091454                          |
| 7965979 | ALDH1L2   | 2.5854023 | up | aldehyde dehydrogenase 1 family, member L2                       |
| 8016841 | TMEM100   | 2.5852265 | up | transmembrane protein 100                                        |

## Supplemental Table 1b

eMSC vs. eEN

|         |                |           |    |                                                            |
|---------|----------------|-----------|----|------------------------------------------------------------|
| 7903742 | GSTM4 GSTM2    | 2.5844462 | up | glutathione S-transferase M4   glutathione S-transferase I |
| 8056545 | STK39          | 2.583605  | up | serine threonine kinase 39 (STE20/SPS1 homolog, yeast)     |
| 8141140 | DLX5           | 2.5795555 | up | distal-less homeobox 5                                     |
| 8095868 | UNQ3028        | 2.575984  | up | TSSP3028                                                   |
| 8157691 | LOC729012      | 2.573452  | up | similar to Spindle and kinetochore-associated protein 2 (P |
| 8069532 | STCH           | 2.572989  | up | stress 70 protein chaperone, microsome-associated, 60kD    |
| 7986359 | IGF1R          | 2.5719109 | up | insulin-like growth factor 1 receptor                      |
| 7919305 | PRKAB2         | 2.5708048 | up | protein kinase, AMP-activated, beta 2 non-catalytic subun  |
| 8096160 | ARHGAP24       | 2.570221  | up | Rho GTPase activating protein 24                           |
| 8102938 | RNF150         | 2.5631487 | up | ring finger protein 150                                    |
| 8135218 | LRRC17         | 2.5620558 | up | leucine rich repeat containing 17                          |
| 7950906 | CTSC           | 2.5608585 | up | cathepsin C                                                |
| 8145977 | PLEKHA2        | 2.5578613 | up | pleckstrin homology domain containing, family A (phosph    |
| 8063536 | TFAP2C         | 2.5513031 | up | transcription factor AP-2 gamma (activating enhancer bin   |
| 8083075 | ACPL2          | 2.5498872 | up | acid phosphatase-like 2                                    |
| 8087935 | NT5DC2         | 2.5477347 | up | 5'-nucleotidase domain containing 2                        |
| 8127778 | FAM46A         | 2.544478  | up | family with sequence similarity 46, member A               |
| 8115234 | ANXA6          | 2.541147  | up | annexin A6                                                 |
| 8107307 | CAMK4          | 2.535864  | up | calcium/calmodulin-dependent protein kinase IV             |
| 7968703 | NHLRC3         | 2.5341444 | up | NHL repeat containing 3                                    |
| 7943218 | PANX1          | 2.5311704 | up | pannexin 1                                                 |
| 8049448 | CENTG2         | 2.5306582 | up | centaurin, gamma 2                                         |
| 8156134 | NTRK2          | 2.522894  | up | neurotrophic tyrosine kinase, receptor, type 2             |
| 7902810 | LMO4           | 2.5168648 | up | LIM domain only 4                                          |
| 8001387 | SALL1          | 2.5143614 | up | sal-like 1 (Drosophila)                                    |
| 7906061 | SYT11          | 2.513235  | up | synaptotagmin XI                                           |
| 8103341 | MAP9           | 2.509036  | up | microtubule-associated protein 9                           |
| 7921344 | ELL2           | 2.5055363 | up | elongation factor, RNA polymerase II, 2                    |
| 7944049 | SIDT2          | 2.5012624 | up | SID1 transmembrane family, member 2                        |
| 7972157 | EDNRB          | 2.4940317 | up | endothelin receptor type B                                 |
| 8009417 | KPNA2 LOC72886 | 2.493966  | up | karyopherin alpha 2 (RAG cohort 1, importin alpha 1)   ka  |
| 7902495 | NEXN           | 2.4924867 | up | nexilin (F actin binding protein)                          |
| 7953040 | CACNA1C        | 2.4853613 | up | calcium channel, voltage-dependent, L type, alpha 1C sub   |

## Supplemental Table 1b

eMSC vs. eEN

|         |                |           |    |                                                                |
|---------|----------------|-----------|----|----------------------------------------------------------------|
| 7986350 | ARRDC4         | 2.4799185 | up | arrestin domain containing 4                                   |
| 8132860 | EGFR           | 2.479257  | up | epidermal growth factor receptor (erythroblastic leukemia)     |
| 8061572 | COX4I2         | 2.4780135 | up | cytochrome c oxidase subunit IV isoform 2 (lung)               |
| 8019737 | KPNA2 LOC72886 | 2.475563  | up | karyopherin alpha 2 (RAG cohort 1, importin alpha 1)   ka      |
| 8017039 | 4-Sep          | 2.4741364 | up | septin 4                                                       |
| 8147469 | PGCP           | 2.473023  | up | plasma glutamate carboxypeptidase                              |
| 8081081 | EPHA3          | 2.4679875 | up | EPH receptor A3                                                |
| 8046488 | CDCA7          | 2.4595952 | up | cell division cycle associated 7                               |
| 8108749 | PCDHB18        | 2.4583752 | up | protocadherin beta 18 pseudogene                               |
| 8099897 | UGDH           | 2.4574623 | up | UDP-glucose dehydrogenase                                      |
| 7977270 | LOC388022      | 2.456932  | up | hypothetical gene supported by AK131040                        |
| 7992917 | CLUAP1         | 2.4552097 | up | clusterin associated protein 1                                 |
| 8176026 | FLNA           | 2.4544795 | up | filamin A, alpha (actin binding protein 280)                   |
| 8138824 | SCRN1          | 2.4541445 | up | secernin 1                                                     |
| 7977621 | NDRG2          | 2.4539258 | up | NDRG family member 2                                           |
| 8105229 | PELO ITGA1     | 2.4500363 | up | pelota homolog (Drosophila)   integrin, alpha 1                |
| 7968236 | RASL11A        | 2.4498627 | up | RAS-like, family 11, member A                                  |
| 8151496 | ZNF704         | 2.447036  | up | zinc finger protein 704                                        |
| 7923119 | ZBTB41         | 2.442035  | up | zinc finger and BTB domain containing 41                       |
| 8115196 | ZNF300         | 2.4406602 | up | zinc finger protein 300                                        |
| 8165911 | TBL1X          | 2.4394915 | up | transducin (beta)-like 1X-linked                               |
| 7897803 | PLOD1 LOC10013 | 2.4376972 | up | procollagen-lysine 1, 2-oxoglutarate 5-dioxygenase 1   hyp     |
| 7930194 | CNNM2          | 2.434236  | up | cyclin M2                                                      |
| 8021695 | DOK6           | 2.4219947 | up | docking protein 6                                              |
| 8156278 | S1PR3 C9orf47  | 2.4218514 | up | sphingosine-1-phosphate receptor 3   chromosome 9 open         |
| 8143772 | RARRES2        | 2.417713  | up | retinoic acid receptor responder (tazarotene induced) 2        |
| 8086125 | LBA1           | 2.4137568 | up | lupus brain antigen 1                                          |
| 7945262 | JAM3           | 2.4121907 | up | junctional adhesion molecule 3                                 |
| 7970924 | STARD13        | 2.4070475 | up | StAR-related lipid transfer (START) domain containing 13       |
| 7979085 | PYGL           | 2.4004998 | up | phosphorylase, glycogen; liver (Hers disease, glycogen storage |
| 8175593 | IDS            | 2.4004467 | up | iduronate 2-sulfatase (Hunter syndrome)                        |
| 7903753 | GSTM2          | 2.3924668 | up | glutathione S-transferase M2 (muscle)                          |
| 8138370 | ANKMY2         | 2.3922408 | up | ankyrin repeat and MYND domain containing 2                    |

## Supplemental Table 1b

eMSC vs. eEN

|         |               |           |    |                                                                  |
|---------|---------------|-----------|----|------------------------------------------------------------------|
| 8098344 | NBLA00301     | 2.3904407 | up | Nbla00301                                                        |
| 7925500 | CHML          | 2.3876133 | up | choroideremia-like (Rab escort protein 2)                        |
| 8104570 | FAM105A       | 2.3853912 | up | family with sequence similarity 105, member A                    |
| 8122038 | TMEM200A      | 2.3779905 | up | transmembrane protein 200A                                       |
| 8097256 | FGF2          | 2.3770373 | up | fibroblast growth factor 2 (basic)                               |
| 7954899 | CNTN1         | 2.3766263 | up | contactin 1                                                      |
| 8097356 | PLK4          | 2.3755062 | up | polo-like kinase 4 (Drosophila)                                  |
| 7905339 | MGC29891      | 2.3744543 | up |                                                                  |
| 7903565 | GPSM2         | 2.3714767 | up | G-protein signaling modulator 2 (AGS3-like, C. elegans)          |
| 8151101 | MYBL1         | 2.3698964 | up | v-myb myeloblastosis viral oncogene homolog (avian)-like         |
| 7940160 | DTX4          | 2.3601065 | up | deltex 4 homolog (Drosophila)                                    |
| 8173917 | NAP1L3        | 2.3534753 | up | nucleosome assembly protein 1-like 3                             |
| 8092578 | ETV5          | 2.352916  | up | ets variant gene 5 (ets-related molecule)                        |
| 7923386 | LMOD1         | 2.352422  | up | leiomodoin 1 (smooth muscle)                                     |
| 8020183 | IMPA2         | 2.3520787 | up | inositol(myo)-1(or 4)-monophosphatase 2                          |
| 7962000 | PTHLH         | 2.3495505 | up | parathyroid hormone-like hormone                                 |
| 7927606 | PRKG1         | 2.348604  | up | protein kinase, cGMP-dependent, type I                           |
| 8020090 | TWSG1         | 2.3455162 | up | twisted gastrulation homolog 1 (Drosophila)                      |
| 7956573 | SLC26A10 GEFT | 2.344196  | up | solute carrier family 26, member 10   RhoA/RAC/CDC42 e           |
| 8139131 | AMPH          | 2.340558  | up | amphiphysin                                                      |
| 8079037 | TRAK1         | 2.3378618 | up | trafficking protein, kinesin binding 1                           |
| 8070194 | RUNX1         | 2.3376195 | up | runt-related transcription factor 1 (acute myeloid leukemia)     |
| 7929976 | RP11-529I10.4 | 2.3324246 | up | deleted in a mouse model of primary ciliary dyskinesia           |
| 8101828 | TSPAN5        | 2.3302152 | up | tetraspanin 5                                                    |
| 8058614 | LANCL1        | 2.3269923 | up | LanC lantibiotic synthetase component C-like 1 (bacterial)       |
| 7982597 | THBS1         | 2.3249438 | up | thrombospondin 1                                                 |
| 8133860 | GNAI1         | 2.3194351 | up | guanine nucleotide binding protein (G protein), alpha inhibitory |
| 8041206 | LBH           | 2.3172107 | up | limb bud and heart development homolog (mouse)                   |
| 8013753 | RAB34         | 2.3165483 | up |                                                                  |
| 8092707 | LEPREL1       | 2.3147504 | up | leprecan-like 1                                                  |
| 8040292 | GREB1         | 2.3134553 | up |                                                                  |
| 8006736 | DUSP14        | 2.3132832 | up | dual specificity phosphatase 14                                  |
| 8124040 | ATXN1         | 2.311611  | up | ataxin 1                                                         |

## Supplemental Table 1b

eMSC vs. eEN

|         |             |           |    |                                                              |
|---------|-------------|-----------|----|--------------------------------------------------------------|
| 7983393 | SORD        | 2.3087034 | up | sorbitol dehydrogenase                                       |
| 8007828 | MAPT        | 2.3083363 | up | microtubule-associated protein tau                           |
| 7966690 | TBX3        | 2.305589  | up | T-box 3 (ulnar mammary syndrome)                             |
| 8061013 | C20orf82    | 2.305559  | up | chromosome 20 open reading frame 82                          |
| 8094190 | CC2D2A      | 2.304897  | up | coiled-coil and C2 domain containing 2A                      |
| 7917037 | CRYZ        | 2.3039362 | up | crystallin, zeta (quinone reductase)                         |
| 7943376 | KIAA1377    | 2.2945864 | up |                                                              |
| 7976826 | SNORD114-26 | 2.2927043 | up | small nucleolar RNA, C/D box 114-26                          |
| 8054281 | LONRF2      | 2.2920182 | up | LON peptidase N-terminal domain and ring finger 2            |
| 7979400 | C14orf37    | 2.2906346 | up | chromosome 14 open reading frame 37                          |
| 8113981 | P4HA2       | 2.290082  | up | procollagen-proline, 2-oxoglutarate 4-dioxygenase (prolin    |
| 7988789 | DMXL2       | 2.28493   | up | Dmx-like 2                                                   |
| 8044882 | EPB41L5     | 2.28226   | up | erythrocyte membrane protein band 4.1 like 5                 |
| 8135705 | KCND2       | 2.277837  | up | potassium voltage-gated channel, Shal-related subfamily,     |
| 8160332 | MLLT3       | 2.2774065 | up | myeloid/lymphoid or mixed-lineage leukemia (trithorax ho     |
| 8067233 | PMEPA1      | 2.2762015 | up | prostate transmembrane protein, androgen induced 1           |
| 8099982 | APBB2       | 2.2726645 | up | amyloid beta (A4) precursor protein-binding, family B, me    |
| 8064978 | JAG1        | 2.2711537 | up | jagged 1 (Alagille syndrome)                                 |
| 8145611 | FZD3        | 2.2706816 | up | frizzled homolog 3 (Drosophila)                              |
| 8112746 | WDR41       | 2.2693467 | up | WD repeat domain 41                                          |
| 7972682 | KDELC1      | 2.2605104 | up | KDEL (Lys-Asp-Glu-Leu) containing 1                          |
| 8174692 |             | 2.2599142 | up | septin 6                                                     |
| 7963157 | RACGAP1     | 2.2597415 | up | Rac GTPase activating protein 1                              |
| 7922717 | RGS16       | 2.2595677 | up | regulator of G-protein signaling 16                          |
| 7975095 | PLEKHG3     | 2.2593005 | up | pleckstrin homology domain containing, family G (with Rh     |
| 7976816 | SNORD114-3  | 2.2589717 | up | small nucleolar RNA, C/D box 114-3                           |
| 8102482 | SEC24D      | 2.2560675 | up | SEC24 related gene family, member D ( <i>S. cerevisiae</i> ) |
| 8117995 | TUBB        | 2.2554436 | up | tubulin, beta                                                |
| 8177858 | TUBB        | 2.255005  | up | tubulin, beta                                                |
| 8179174 | TUBB        | 2.2549276 | up | tubulin, beta                                                |
| 8163839 | C5          | 2.2520294 | up | complement component 5                                       |
| 7997712 | IRF8        | 2.2504349 | up | interferon regulatory factor 8                               |
| 7951593 | FLJ45803    | 2.2503383 | up |                                                              |

## Supplemental Table 1b

eMSC vs. eEN

|         |                 |           |    |                                                                    |
|---------|-----------------|-----------|----|--------------------------------------------------------------------|
| 8124280 | C6orf32         | 2.2450812 | up | chromosome 6 open reading frame 32                                 |
| 8112615 | ENC1            | 2.24296   | up | ectodermal-neural cortex (with BTB-like domain)                    |
| 8097753 | DCLK2           | 2.2396555 | up | doublecortin-like kinase 2                                         |
| 8054580 | BUB1            | 2.236014  | up |                                                                    |
| 7949948 | C11orf24        | 2.2278655 | up | chromosome 11 open reading frame 24                                |
| 8101701 | PPM1K           | 2.224884  | up | protein phosphatase 1K (PP2C domain containing)                    |
| 8067305 | SYCP2           | 2.2178705 | up | synaptonemal complex protein 2                                     |
| 7947230 | BDNF            | 2.2159224 | up | brain-derived neurotrophic factor                                  |
| 8019964 | ARHGAP28        | 2.2154784 | up | Rho GTPase activating protein 28                                   |
| 8145365 | DOCK5           | 2.2130265 | up | dedicator of cytokinesis 5                                         |
| 7991335 | ANPEP           | 2.2102418 | up | alanyl (membrane) aminopeptidase (aminopeptidase N, a              |
| 7947363 | WT1             | 2.2092564 | up | Wilms tumor 1                                                      |
| 8083757 | NMD3            | 2.207797  | up |                                                                    |
| 8151931 | TSPYL5          | 2.207631  | up | TSPY-like 5                                                        |
| 7938528 | PARVA           | 2.2067158 | up | parvin, alpha                                                      |
| 8112841 | HOMER1          | 2.2036126 | up | homer homolog 1 (Drosophila)                                       |
| 8130191 | RMND1           | 2.2021904 | up | required for meiotic nuclear division 1 homolog (S. cerevisiae)    |
| 8046086 | LASS6           | 2.2000744 | up | LAG1 homolog, ceramide synthase 6                                  |
| 8127841 | PGM3            | 2.1982107 | up | phosphoglucomutase 3                                               |
| 7969179 | RNASEH2B        | 2.191911  | up | ribonuclease H2, subunit B                                         |
| 7956401 | SHMT2           | 2.1903126 | up | serine hydroxymethyltransferase 2 (mitochondrial)                  |
| 7975121 | FNTB            | 2.1895485 | up | farnesyltransferase, CAAX box, beta                                |
| 8052762 | GFPT1           | 2.1880841 | up | glutamine-fructose-6-phosphate transaminase 1                      |
| 8034940 | NOTCH3          | 2.1876569 | up | Notch homolog 3 (Drosophila)                                       |
| 7965956 | NFYB            | 2.1870158 | up | nuclear transcription factor Y, beta                               |
| 8005132 | MEIS3P1         | 2.1855595 | up | Meis homeobox 3 pseudogene 1                                       |
| 7928444 | VCL             | 2.183671  | up | vinculin                                                           |
| 8134030 | STEAP1          | 2.1814744 | up | six transmembrane epithelial antigen of the prostate 1             |
| 7923131 | DENND1B C1orf2: | 2.1806452 | up | DENN/MADD domain containing 1B   chromosome 1 open reading frame 2 |
| 8106336 | SV2C            | 2.18037   | up | synaptic vesicle glycoprotein 2C                                   |
| 8120402 | BAG2            | 2.180336  | up | BCL2-associated athanogene 2                                       |
| 7970569 | SACS            | 2.1796408 | up | spastic ataxia of Charlevoix-Saguenay (sacsin)                     |
| 8099172 | CRMP1           | 2.1795685 | up | collapsin response mediator protein 1                              |



## Supplemental Table 1b

eMSC vs. eEN

|         |            |           |    |                                                             |
|---------|------------|-----------|----|-------------------------------------------------------------|
| 8002403 | ABBA-1     | 2.1794279 | up | actin-bundling protein with BAIAP2 homology                 |
| 8021169 | LIPG       | 2.1779666 | up | lipase, endothelial                                         |
| 8171516 | RBBP7      | 2.1747248 | up | retinoblastoma binding protein 7                            |
| 7968417 | FRY        | 2.1722558 | up | furry homolog (Drosophila)                                  |
| 8126163 | KCNK17     | 2.1717622 | up | potassium channel, subfamily K, member 17                   |
| 7971104 | TRPC4      | 2.171385  | up | transient receptor potential cation channel, subfamily C, r |
| 8022803 | FAM59A     | 2.1708407 | up | family with sequence similarity 59, member A                |
| 8078650 | CTDSPL     | 2.1691623 | up | CTD (carboxy-terminal domain, RNA polymerase II, polype     |
| 8058390 | RAPH1      | 2.1635306 | up | Ras association (RalGDS/AF-6) and pleckstrin homology do    |
| 8167957 | ZC3H12B    | 2.1615007 | up | zinc finger CCCH-type containing 12B                        |
| 7990545 | CSPG4      | 2.159077  | up | chondroitin sulfate proteoglycan 4                          |
| 7908940 | ATP2B4     | 2.155601  | up | ATPase, Ca <sup>++</sup> transporting, plasma membrane 4    |
| 7922137 | NME7       | 2.1515427 | up | non-metastatic cells 7, protein expressed in (nucleoside-d  |
| 7999079 | ADCY9      | 2.1489997 | up | adenylate cyclase 9                                         |
| 8138489 | CDCA7L     | 2.148699  | up | cell division cycle associated 7-like                       |
| 8067985 | NCAM2      | 2.1449573 | up | neural cell adhesion molecule 2                             |
| 8053668 | EIF2AK3    | 2.14312   | up | eukaryotic translation initiation factor 2-alpha kinase 3   |
| 8138527 | MGC87042   | 2.1430395 | up | similar to Six transmembrane epithelial antigen of prostat  |
| 8132055 | C7orf41    | 2.1424356 | up | chromosome 7 open reading frame 41                          |
| 8071768 | SMARCB1    | 2.1403227 | up | SWI/SNF related, matrix associated, actin dependent regu    |
| 7976812 | SNORD113-4 | 2.139906  | up | small nucleolar RNA, C/D box 113-4                          |
| 8091648 | SSR3       | 2.1392276 | up | signal sequence receptor, gamma (translocon-associated      |
| 8160718 | PTENP1     | 2.138676  | up | phosphatase and tensin homolog (mutated in multiple ad'     |
| 8006415 | TMEM98     | 2.1385286 | up | transmembrane protein 98                                    |
| 7928171 | SGPL1      | 2.137399  | up | sphingosine-1-phosphate lyase 1                             |
| 7985809 | ABHD2      | 2.1357455 | up | abhydrolase domain containing 2                             |
| 7936041 | ARL3       | 2.1348045 | up | ADP-ribosylation factor-like 3                              |
| 8157233 | HSDL2      | 2.13216   | up | hydroxysteroid dehydrogenase like 2                         |
| 8091354 | HLTF       | 2.129838  | up | helicase-like transcription factor                          |
| 8119898 | VEGFA      | 2.1282637 | up | vascular endothelial growth factor A                        |
| 8063410 | PARD6B     | 2.1260538 | up | par-6 partitioning defective 6 homolog beta (C. elegans)    |
| 7952490 | FEZ1       | 2.1247118 | up | fasciculation and elongation protein zeta 1 (zygin I)       |
| 7912292 | LZIC       | 2.1233947 | up | leucine zipper and CTNNBIP1 domain containing               |

## Supplemental Table 1b

eMSC vs. eEN

|         |                  |           |    |                                                               |
|---------|------------------|-----------|----|---------------------------------------------------------------|
| 7976795 | MEG3 LOC100131   | 2.123335  | up | maternally expressed 3   hypothetical protein LOC100131       |
| 8096771 | DC2              | 2.1214964 | up |                                                               |
| 8013399 | ULK2             | 2.1192396 | up | unc-51-like kinase 2 (C. elegans)                             |
| 7973336 | MMP14            | 2.1180592 | up | matrix metalloproteinase 14 (membrane-inserted)               |
| 8170390 | IDS LOC727913    | 2.1177115 | up | iduronate 2-sulfatase (Hunter syndrome)   similar to idurc    |
| 8043363 | C2orf59 LOC5414  | 2.1143498 | up | chromosome 2 open reading frame 59   hypothetical LOC         |
| 7904965 | PDE4DIP          | 2.1126711 | up | phosphodiesterase 4D interacting protein (myomegalin)         |
| 8092691 | BCL6             | 2.1125078 | up | B-cell CLL/lymphoma 6 (zinc finger protein 51)                |
| 7926821 | MASTL            | 2.109497  | up | microtubule associated serine/threonine kinase-like           |
| 8106350 | NBLA11895        | 2.1084785 | up | putative protein product of Nbla11895                         |
| 8021129 | C18orf23 RNF165  | 2.104774  | up | chromosome 18 open reading frame 23   ring finger prote       |
| 8083092 | ZBTB38           | 2.1021607 | up | zinc finger and BTB domain containing 38                      |
| 8142407 | TMEM168          | 2.1017284 | up | transmembrane protein 168                                     |
| 8172043 | SRPX             | 2.0981677 | up | sushi-repeat-containing protein, X-linked                     |
| 7940626 | SCGB2A1          | 2.0979328 | up | secretoglobin, family 2A, member 1                            |
| 8165642 | TMEM203          | 2.0959458 | up | transmembrane protein 203                                     |
| 8106098 | MAP1B            | 2.0952227 | up | microtubule-associated protein 1B                             |
| 7921099 | CRABP2           | 2.0938404 | up | cellular retinoic acid binding protein 2                      |
| 7974316 | FRMD6            | 2.0901413 | up | FERM domain containing 6                                      |
| 7935188 | SORBS1           | 2.0898821 | up | sorbin and SH3 domain containing 1                            |
| 7973709 | NFATC4           | 2.0893679 | up | nuclear factor of activated T-cells, cytoplasmic, calcineurir |
| 8172158 | CASK             | 2.0848565 | up | calcium/calmodulin-dependent serine protein kinase (MA        |
| 8007323 | CNTNAP1          | 2.084573  | up | contactin associated protein 1                                |
| 8042259 | MDH1             | 2.0830748 | up | malate dehydrogenase 1, NAD (soluble)                         |
| 7969665 | HS6ST3 LOC100131 | 2.0826697 | up | heparan sulfate 6-O-sulfotransferase 3   similar to hepara    |
| 8167815 | MAGED2           | 2.078099  | up | melanoma antigen family D, 2                                  |
| 8066716 | ELMO2            | 2.0773559 | up | engulfment and cell motility 2                                |
| 8103399 | PDGFC            | 2.0767581 | up | platelet derived growth factor C                              |
| 8175755 | CETN2            | 2.076162  | up | centrin, EF-hand protein, 2                                   |
| 8053484 | ST3GAL5          | 2.074999  | up | ST3 beta-galactoside alpha-2,3-sialyltransferase 5            |
| 7904131 | DCLRE1B          | 2.0748694 | up | DNA cross-link repair 1B (PSO2 homolog, S. cerevisiae)        |
| 8068697 | MX2              | 2.0706654 | up | myxovirus (influenza virus) resistance 2 (mouse)              |
| 7950671 | GAB2             | 2.06765   | up | GRB2-associated binding protein 2                             |

Supplemental Table 1b  
eMSC vs. eEN

|         |                |           |    |                                                           |
|---------|----------------|-----------|----|-----------------------------------------------------------|
| 7909142 | LOC100130123 N | 2.066897  | up | PRO2870   nuclear casein kinase and cyclin-dependent kir  |
| 8089714 | LSAMP          | 2.066814  | up | limbic system-associated membrane protein                 |
| 8170119 | FHL1           | 2.0666223 | up | four and a half LIM domains 1                             |
| 8101839 | EIF4E          | 2.0636563 | up | eukaryotic translation initiation factor 4E               |
| 8105348 | LOC493869      | 2.062975  | up | similar to RIKEN cDNA 2310016C16                          |
| 8042830 | MTHFD2         | 2.0613186 | up | methylenetetrahydrofolate dehydrogenase (NADP+ deper      |
| 8115814 | SH3PXD2B       | 2.0609057 | up | SH3 and PX domains 2B                                     |
| 8091537 | IGSF10         | 2.0603764 | up | immunoglobulin superfamily, member 10                     |
| 8014233 | SLFN11         | 2.0559113 | up | schlafen family member 11                                 |
| 8111490 | PRLR           | 2.0544977 | up | prolactin receptor                                        |
| 8070557 | ZNF295         | 2.0538585 | up | zinc finger protein 295                                   |
| 8126839 | TNFRSF21       | 2.0537121 | up | tumor necrosis factor receptor superfamily, member 21     |
| 8108744 | PCDHB14        | 2.0533898 | up | protocadherin beta 14                                     |
| 8174103 | GK GK3P        | 2.0532682 | up | glycerol kinase   glycerol kinase 3 pseudogene            |
| 7907893 | MR1            | 2.0506814 | up | major histocompatibility complex, class I-related         |
| 8160168 | FREM1          | 2.0502744 | up | FRAS1 related extracellular matrix 1                      |
| 7963880 | ITGA7          | 2.0499918 | up | integrin, alpha 7                                         |
| 8049187 | EFHD1          | 2.0491438 | up | EF-hand domain family, member D1                          |
| 8068105 | BACH1          | 2.045707  | up | BTB and CNC homology 1, basic leucine zipper transcriptic |
| 7927146 | CSGALNACT2     | 2.0429697 | up | chondroitin sulfate N-acetylgalactosaminyltransferase 2   |
| 8108688 | PCDHB3         | 2.0421216 | up | protocadherin beta 3                                      |
| 7914648 | PHC2           | 2.041176  | up | polyhomeotic homolog 2 (Drosophila)                       |
| 8145865 | GPR124         | 2.0407686 | up | G protein-coupled receptor 124                            |
| 8055096 | AMMECR1L       | 2.0346012 | up | AMME chromosomal region gene 1-like                       |
| 8100318 | SGCB           | 2.0342505 | up | sarcoglycan, beta (43kDa dystrophin-associated glycoprot  |
| 8076355 | PMM1           | 2.033128  | up | phosphomannomutase 1                                      |
| 8017927 | ABCA9          | 2.0324588 | up | ATP-binding cassette, sub-family A (ABC1), member 9       |
| 8120043 | RUNX2          | 2.0308304 | up | runt-related transcription factor 2                       |
| 8034342 | ZNF625 ZNF20   | 2.028837  | up | zinc finger protein 625   zinc finger protein 20          |
| 8146967 | CRISPLD1       | 2.0283432 | up | cysteine-rich secretory protein LCCL domain containing 1  |
| 7950743 | RAB30          | 2.028309  | up |                                                           |
| 7971922 | PCDH9          | 2.028291  | up | protocadherin 9                                           |
| 8046530 | HOXD11         | 2.0266235 | up | homeobox D11                                              |

## Supplemental Table 1b

eMSC vs. eEN

|         |                 |           |    |                                                            |
|---------|-----------------|-----------|----|------------------------------------------------------------|
| 7943442 | DYNC2H1         | 2.0263352 | up | dynein, cytoplasmic 2, heavy chain 1                       |
| 7969736 | FARP1           | 2.0248146 | up | FERM, RhoGEF (ARHGEF) and pleckstrin domain protein 1      |
| 7995681 | MMP2            | 2.0231397 | up | matrix metalloproteinase 2 (gelatinase A, 72kDa gelatinase |
| 7919642 | HIST2H2AB       | 2.0205243 | up | histone cluster 2, H2ab                                    |
| 8169015 | TCEAL7          | 2.0197153 | up | transcription elongation factor A (SII)-like 7             |
| 8096675 | TET2            | 2.0139556 | up | tet oncogene family member 2                               |
| 8029693 | FOSB            | 2.01055   | up | FBJ murine osteosarcoma viral oncogene homolog B           |
| 7989661 | OAZ2            | 2.0074828 | up | ornithine decarboxylase antizyme 2                         |
| 8096669 | TET2            | 2.0072231 | up | tet oncogene family member 2                               |
| 8001133 | SHCBP1          | 2.0064428 | up | SHC SH2-domain binding protein 1                           |
| 8155754 | MAMDC2          | 2.0047696 | up | MAM domain containing 2                                    |
| 8126402 | TRERF1          | 2.004398  | up | transcriptional regulating factor 1                        |
| 8124397 | HIST1H1C        | 2.0036356 | up | histone cluster 1, H1c                                     |
| 8047161 | OBFC2A          | 2.0011382 | up | oligonucleotide/oligosaccharide-binding fold containing 2. |
| 8034227 | RGL3            | 2.000977  | up | ral guanine nucleotide dissociation stimulator-like 3      |
| 7904000 | DDX20           | 2.0002663 | up | DEAD (Asp-Glu-Ala-Asp) box polypeptide 20                  |
| 8072626 | TIMP3           | 1.9996583 | up | TIMP metalloproteinase inhibitor 3 (Sorsby fundus dystrop  |
| 8156581 | C9orf102        | 1.9985563 | up | chromosome 9 open reading frame 102                        |
| 8058221 | TRAK2           | 1.9938765 | up | trafficking protein, kinesin binding 2                     |
| 7954312 | SLCO1C1         | 1.9892976 | up | solute carrier organic anion transporter family, member 1  |
| 8083223 | C3orf58         | 1.9888023 | up | chromosome 3 open reading frame 58                         |
| 8041853 | TACSTD1         | 1.9872744 | up | tumor-associated calcium signal transducer 1               |
| 8167125 | USP11           | 1.9853976 | up | ubiquitin specific peptidase 11                            |
| 8106743 | VCAN            | 1.9846511 | up | versican                                                   |
| 8041179 | CLIP4           | 1.9838941 | up | CAP-GLY domain containing linker protein family, member    |
| 7909285 | PFKFB2          | 1.9827803 | up | 6-phosphofructo-2-kinase/fructose-2,6-biphosphatase 2      |
| 8081386 | NFKBIZ          | 1.981119  | up | nuclear factor of kappa light polypeptide gene enhancer ii |
| 8084955 | PIGX            | 1.9794303 | up | phosphatidylinositol glycan anchor biosynthesis, class X   |
| 7923731 | RIPK5           | 1.9793913 | up | receptor interacting protein kinase 5                      |
| 7990657 | TBC1D2B         | 1.9791007 | up | TBC1 domain family, member 2B                              |
| 7997582 | WFDC1           | 1.978806  | up | WAP four-disulfide core domain 1                           |
| 8054611 | C2orf59 LOC5414 | 1.977809  | up | chromosome 2 open reading frame 59   hypothetical LOC      |
| 7932227 | NMT2            | 1.9764775 | up | N-myristoyltransferase 2                                   |

## Supplemental Table 1b

eMSC vs. eEN

|         |              |           |    |                                                                            |
|---------|--------------|-----------|----|----------------------------------------------------------------------------|
| 8120222 | EFHC1        | 1.9753001 | up | EF-hand domain (C-terminal) containing 1                                   |
| 8106280 | HMGCR        | 1.9751363 | up | 3-hydroxy-3-methylglutaryl-Coenzyme A reductase                            |
| 7929026 | LOC100132116 | 1.970656  | up |                                                                            |
| 8136347 | CALD1        | 1.9683148 | up | caldesmon 1                                                                |
| 7991216 | DET1         | 1.9675393 | up | de-etiolated homolog 1 (Arabidopsis)                                       |
| 8068620 | SH3BGR       | 1.9655517 | up | SH3 domain binding glutamic acid-rich protein                              |
| 8035896 | TSHZ3        | 1.9643707 | up | teashirt zinc finger homeobox 3                                            |
| 8018754 | CYGB         | 1.9640734 | up | cytoglobin                                                                 |
| 7990643 | LINGO1       | 1.9638884 | up | leucine rich repeat and Ig domain containing 1                             |
| 8155121 | NPR2         | 1.9623313 | up | natriuretic peptide receptor B/guanylate cyclase B (atrioventricular node) |
| 7947681 | ARHGAP1      | 1.9616666 | up | Rho GTPase activating protein 1                                            |
| 8085788 | NKIRAS1      | 1.9586078 | up | NFKB inhibitor interacting Ras-like 1                                      |
| 8107850 | CHSY3        | 1.9577262 | up | chondroitin sulfate synthase 3                                             |
| 8108697 | PCDHB5       | 1.956867  | up | protocadherin beta 5                                                       |
| 7959638 | TCTN2        | 1.9567004 | up | tectonic family member 2                                                   |
| 8109528 | CYFIP2       | 1.9564378 | up | cytoplasmic FMR1 interacting protein 2                                     |
| 8146544 | LOC137886    | 1.956064  | up |                                                                            |
| 8163618 | TNFSF15      | 1.9543116 | up | tumor necrosis factor (ligand) superfamily, member 15                      |
| 8111136 | FAM134B      | 1.9533916 | up | family with sequence similarity 134, member B                              |
| 7933821 | RHOBTB1      | 1.9525049 | up | Rho-related BTB domain containing 1                                        |
| 7949503 | EFEMP2       | 1.9521787 | up | EGF-containing fibulin-like extracellular matrix protein 2                 |
| 7986214 | SLCO3A1      | 1.9519105 | up | solute carrier organic anion transporter family, member 3                  |
| 7939298 | CAT          | 1.9516828 | up | catalase                                                                   |
| 7936516 | HSPA12A      | 1.9510367 | up | heat shock 70kDa protein 12A                                               |
| 8106494 | BHMT2        | 1.9507045 | up | betaine-homocysteine methyltransferase 2                                   |
| 7986757 | NDN          | 1.9454069 | up | necdin homolog (mouse)                                                     |
| 8083978 | NAALADL2     | 1.9453716 | up | N-acetylated alpha-linked acidic dipeptidase-like 2                        |
| 8034130 | KANK2        | 1.9437175 | up | KN motif and ankyrin repeat domains 2                                      |
| 8156604 | C9orf102     | 1.9416178 | up | chromosome 9 open reading frame 102                                        |
| 8089743 | B4GALT4      | 1.9408283 | up | UDP-Gal:betaGlcNAc beta 1,4- galactosyltransferase, polypeptide chain 4    |
| 8129254 | MAN1A1       | 1.9383783 | up | mannosidase, alpha, class 1A, member 1                                     |
| 8115651 | GABRB2       | 1.9368081 | up | gamma-aminobutyric acid (GABA) A receptor, beta 2                          |
| 7995755 | OGFOD1       | 1.9359403 | up | 2-oxoglutarate and iron-dependent oxygenase domain containing 1            |

## Supplemental Table 1b

eMSC vs. eEN

|         |                 |           |    |                                                           |
|---------|-----------------|-----------|----|-----------------------------------------------------------|
| 8008646 | SCPEP1          | 1.9340013 | up | serine carboxypeptidase 1                                 |
| 7938364 | WEE1            | 1.9339514 | up |                                                           |
| 7982564 | SPRED1          | 1.9335378 | up | sprouty-related, EVH1 domain containing 1                 |
| 7923141 | DENND1B C1orf2: | 1.931413  | up | DENN/MADD domain containing 1B   chromosome 1 open        |
| 8021286 | C18orf54        | 1.92882   | up | chromosome 18 open reading frame 54                       |
| 8046685 | UBE2E3 UBE2E4P  | 1.928486  | up | ubiquitin-conjugating enzyme E2E 3 (UBC4/5 homolog, ye    |
| 8115490 | ADAM19          | 1.9275628 | up | ADAM metallopeptidase domain 19 (meltrin beta)            |
| 8113641 | CDO1            | 1.9251683 | up | cysteine dioxygenase, type I                              |
| 8120378 | KIAA1586        | 1.9248428 | up |                                                           |
| 7907657 | RALGPS2         | 1.9208546 | up | Ral GEF with PH domain and SH3 binding motif 2            |
| 7971296 | EPST11          | 1.920057  | up | epithelial stromal interaction 1 (breast)                 |
| 8042519 | PCYOX1          | 1.9198077 | up | prenylcysteine oxidase 1                                  |
| 8102342 | ELOVL6          | 1.9194882 | up | ELOVL family member 6, elongation of long chain fatty aci |
| 8128991 | LAMA4           | 1.919327  | up | laminin, alpha 4                                          |
| 7952268 | THY1            | 1.9176445 | up | Thy-1 cell surface antigen                                |
| 7951217 | MMP7            | 1.9167758 | up | matrix metallopeptidase 7 (matrilysin, uterine)           |
| 7936115 | SH3PXD2A        | 1.9163363 | up | SH3 and PX domains 2A                                     |
| 8022559 | ANKRD29         | 1.9154146 | up | ankyrin repeat domain 29                                  |
| 8049044 | ARMC9           | 1.9152422 | up | armadillo repeat containing 9                             |
| 7959827 | TMEM132C        | 1.9150875 | up | transmembrane protein 132C                                |
| 7970844 | KATNAL1         | 1.914855  | up | katanin p60 subunit A-like 1                              |
| 8084794 | IL1RAP          | 1.9134887 | up | interleukin 1 receptor accessory protein                  |
| 8146921 | RDH10           | 1.9108905 | up | retinol dehydrogenase 10 (all-trans)                      |
| 8096753 | HADH            | 1.9089295 | up | hydroxyacyl-Coenzyme A dehydrogenase                      |
| 8134051 | FLJ21062        | 1.9087057 | up |                                                           |
| 7951535 | KDEL2           | 1.9082066 | up | KDEL (Lys-Asp-Glu-Leu) containing 2                       |
| 7925257 | LYST            | 1.9075414 | up | lysosomal trafficking regulator                           |
| 8021275 | POLI            | 1.906689  | up | polymerase (DNA directed) iota                            |
| 7964522 | CDK4            | 1.9029464 | up | cyclin-dependent kinase 4                                 |
| 8156263 | SPIN1           | 1.901868  | up | spindlin 1                                                |
| 7944869 | SPA17           | 1.8973817 | up | sperm autoantigenic protein 17                            |
| 8112302 | DKFZP686E2158   | 1.8928131 | up | hypothetical protein LOC643155                            |
| 8156919 | MURC            | 1.890882  | up | muscle-restricted coiled-coil protein                     |

## Supplemental Table 1b

eMSC vs. eEN

|         |                |           |    |                                                           |
|---------|----------------|-----------|----|-----------------------------------------------------------|
| 8116272 | ADAMTS2        | 1.8871129 | up | ADAM metallopeptidase with thrombospondin type 1 mo       |
| 8141459 | GAL3ST4        | 1.8857996 | up | galactose-3-O-sulfotransferase 4                          |
| 8167185 | TIMP1          | 1.8845903 | up | TIMP metallopeptidase inhibitor 1                         |
| 8101260 | ANTXR2         | 1.883315  | up | anthrax toxin receptor 2                                  |
| 8056257 | FAP            | 1.8821706 | up | fibroblast activation protein, alpha                      |
| 7902687 | CYR61          | 1.8815765 | up | cysteine-rich, angiogenic inducer, 61                     |
| 8106556 | CMYA5          | 1.8803809 | up | cardiomyopathy associated 5                               |
| 7954469 | RASSF8         | 1.8802737 | up | Ras association (RalGDS/AF-6) domain family (N-terminal)  |
| 7968577 | NBEA           | 1.8792051 | up | neurobeachin                                              |
| 7965964 | SLC41A2        | 1.8785399 | up | solute carrier family 41, member 2                        |
| 8002492 | HYDIN HYDIN2   | 1.8742002 | up | hydrocephalus inducing homolog (mouse)   hydrocephalu     |
| 8108720 | PCDHB9         | 1.874148  | up | protocadherin beta 9                                      |
| 8103260 | DCHS2          | 1.8692164 | up | dachsous 2 (Drosophila)                                   |
| 7912750 | FBXO42         | 1.8681229 | up | F-box protein 42                                          |
| 8121319 | SOBP           | 1.8681097 | up | sine oculis binding protein homolog (Drosophila)          |
| 8128737 | MICAL1         | 1.8679926 | up | microtubule associated monooxygenase, calponin and LIM    |
| 8139500 | TNS3           | 1.8678768 | up | tensin 3                                                  |
| 8173217 | ARHGEF9        | 1.8678054 | up | Cdc42 guanine nucleotide exchange factor (GEF) 9          |
| 7974461 | LGALS3         | 1.8635132 | up | lectin, galactoside-binding, soluble, 3                   |
| 8064766 | RNF24          | 1.862141  | up | ring finger protein 24                                    |
| 8143629 | OR2A9P OR2A20F | 1.8619837 | up | olfactory receptor, family 2, subfamily A, member 9 pseuc |
| 8108127 | CAMLG          | 1.8584838 | up | calcium modulating ligand                                 |
| 7977674 | SUPT16H        | 1.8575556 | up | suppressor of Ty 16 homolog (S. cerevisiae)               |
| 8131815 | KLHL7          | 1.8550254 | up | kelch-like 7 (Drosophila)                                 |
| 8133938 | CROT           | 1.85486   | up | carnitine O-octanoyltransferase                           |
| 8110147 | C5orf25        | 1.8539087 | up | chromosome 5 open reading frame 25                        |
| 8047659 | ABI2           | 1.8535181 | up | abl interactor 2                                          |
| 8023646 | BCL2           | 1.852345  | up | B-cell CLL/lymphoma 2                                     |
| 8026490 | UCA1           | 1.8515705 | up | urothelial cancer associated 1                            |
| 7936871 | OAT            | 1.8501805 | up | ornithine aminotransferase (gyrate atrophy)               |
| 8158739 | LAMC3          | 1.8490595 | up | laminin, gamma 3                                          |
| 8157246 | KIAA1958       | 1.8446517 | up |                                                           |
| 7961798 | SOX5           | 1.8421392 | up | SRY (sex determining region Y)-box 5                      |

## Supplemental Table 1b

eMSC vs. eEN

|         |                 |           |    |                                                             |
|---------|-----------------|-----------|----|-------------------------------------------------------------|
| 8162039 | C9orf64         | 1.8414762 | up | chromosome 9 open reading frame 64                          |
| 7960362 | UNQ3104         | 1.8406576 | up | ACAH3104                                                    |
| 8130211 | SYNE1 C6orf98   | 1.8392072 | up | spectrin repeat containing, nuclear envelope 1   chromos    |
| 7918026 | EXTL2           | 1.8344102 | up | exostoses (multiple)-like 2                                 |
| 7904907 | BCL9            | 1.8339018 | up | B-cell CLL/lymphoma 9                                       |
| 8036341 | ZNF461          | 1.8324908 | up | zinc finger protein 461                                     |
| 7972239 | SLITRK6         | 1.8301932 | up | SLIT and NTRK-like family, member 6                         |
| 8172395 | SSX10 LOC10013C | 1.8273444 | up | synovial sarcoma, X breakpoint 10   similar to Synovial sar |
| 8141016 | TFPI2           | 1.8267922 | up | tissue factor pathway inhibitor 2                           |
| 8043278 | MRPL35          | 1.824404  | up | mitochondrial ribosomal protein L35                         |
| 8152703 | FBXO32          | 1.8217536 | up | F-box protein 32                                            |
| 7960744 | C1R             | 1.8198911 | up | complement component 1, r subcomponent                      |
| 8062971 | DBNDD2 SYS1-DB  | 1.8182806 | up | dysbindin (dystrobrevin binding protein 1) domain contain   |
| 7955078 | PFKM            | 1.8180363 | up | phosphofructokinase, muscle                                 |
| 7928471 | ADK             | 1.8176742 | up | adenosine kinase                                            |
| 8081503 | DZIP3           | 1.817449  | up | DAZ interacting protein 3, zinc finger                      |
| 7951910 | BACE1           | 1.8172195 | up | beta-site APP-cleaving enzyme 1                             |
| 8078252 | UBE2E2          | 1.8150783 | up | ubiquitin-conjugating enzyme E2E 2 (UBC4/5 homolog, ye      |
| 8086451 | HIGD1A          | 1.8134251 | up | HIG1 domain family, member 1A                               |
| 8055445 | DARS            | 1.8116426 | up | aspartyl-tRNA synthetase                                    |
| 8001800 | CDH11           | 1.8109806 | up | cadherin 11, type 2, OB-cadherin (osteoblast)               |
| 8138749 | HOXA9           | 1.8083297 | up | homeobox A9                                                 |
| 8112803 | LHFPL2          | 1.8080331 | up | lipoma HMGIC fusion partner-like 2                          |
| 8083240 | AGTR1           | 1.8078641 | up | angiotensin II receptor, type 1                             |
| 8126860 | MUT             | 1.8076712 | up | methylmalonyl Coenzyme A mutase                             |
| 8145454 | BNIP3L LOC44025 | 1.807234  | up | BCL2/adenovirus E1B 19kDa interacting protein 3-like   sin  |
| 8121489 | AMD1            | 1.806326  | up | adenosylmethionine decarboxylase 1                          |
| 8052269 | CCDC88A         | 1.8046559 | up | coiled-coil domain containing 88A                           |
| 8091723 | RARRES1         | 1.8021963 | up | retinoic acid receptor responder (tazarotene induced) 1     |
| 8083523 | GMPS            | 1.80126   | up | guanine monphosphate synthetase                             |
| 8149629 | GFRA2           | 1.7988825 | up | GDNF family receptor alpha 2                                |
| 7902913 | CDC7            | 1.7982246 | up | cell division cycle 7 homolog (S. cerevisiae)               |
| 8166098 | RAB9A           | 1.797892  | up |                                                             |



## Supplemental Table 1b

eMSC vs. eEN

|         |                  |           |    |                                                                          |
|---------|------------------|-----------|----|--------------------------------------------------------------------------|
| 8154100 | VLDLR            | 1.7956    | up | very low density lipoprotein receptor                                    |
| 7917347 | DDAH1            | 1.7948732 | up | dimethylarginine dimethylaminohydrolase 1                                |
| 7927288 | FAM35A           | 1.7941909 | up | family with sequence similarity 35, member A                             |
| 8108737 | PCDHB13          | 1.7940896 | up | protocadherin beta 13                                                    |
| 7980044 | PNMA1            | 1.7927135 | up | paraneoplastic antigen MA1                                               |
| 7962013 | ERGIC2           | 1.7919627 | up | ERGIC and golgi 2                                                        |
| 8121392 | C6orf182 C6orf18 | 1.7910508 | up | chromosome 6 open reading frame 182   chromosome 6 open reading frame 18 |
| 8094778 | UCHL1            | 1.7901353 | up | ubiquitin carboxyl-terminal esterase L1 (ubiquitin thiolesterase)        |
| 8081277 | NIT2             | 1.787144  | up | nitrilase family, member 2                                               |
| 8128837 | C6orf186 DDO     | 1.7870835 | up | chromosome 6 open reading frame 186   D-aspartate oxidase                |
| 8101376 | SEC31A           | 1.7857769 | up | SEC31 homolog A ( <i>S. cerevisiae</i> )                                 |
| 8122827 | C6orf97          | 1.7854165 | up | chromosome 6 open reading frame 97                                       |
| 8101489 | CCDC98           | 1.7848489 | up | coiled-coil domain containing 98                                         |
| 8100578 | EPHA5            | 1.7830865 | up | EPH receptor A5                                                          |
| 7939376 | LDLRAD3          | 1.7804433 | up | low density lipoprotein receptor class A domain containing 3             |
| 8021442 | ZNF532           | 1.7752503 | up | zinc finger protein 532                                                  |
| 7928491 | MYST4            | 1.7721095 | up | MYST histone acetyltransferase (monocytic leukemia) 4                    |
| 8174076 | GLA              | 1.7713312 | up | galactosidase, alpha                                                     |
| 7938154 | ILK ILK-2        | 1.7705803 | up | integrin-linked kinase   integrin-linked kinase-2                        |
| 8007745 | HEXIM1           | 1.7701719 | up | hexamethylene bis-acetamide inducible 1                                  |
| 8095760 | THAP6            | 1.7697685 | up | THAP domain containing 6                                                 |
| 8061305 | C20orf19         | 1.7685155 | up | chromosome 20 open reading frame 19                                      |
| 8132151 | ADCYAP1R1        | 1.7683165 | up | adenylate cyclase activating polypeptide 1 (pituitary) receptor 1        |
| 8033233 | TUBB4            | 1.7680738 | up | tubulin, beta 4                                                          |
| 8108716 | PCDHB16          | 1.7671975 | up | protocadherin beta 16                                                    |
| 8068100 | C21orf109        | 1.7655448 | up | chromosome 21 open reading frame 109                                     |
| 7954029 | CDKN1B           | 1.7648859 | up | cyclin-dependent kinase inhibitor 1B (p27, Kip1)                         |
| 8160284 | FAM29A           | 1.7647337 | up | family with sequence similarity 29, member A                             |
| 8096411 | TIGD2            | 1.7641861 | up | tigger transposable element derived 2                                    |
| 8067932 | C21orf34         | 1.7640496 | up | chromosome 21 open reading frame 34                                      |
| 7907466 | DARS2            | 1.7638948 | up | aspartyl-tRNA synthetase 2, mitochondrial                                |
| 8094609 | FAM114A1         | 1.7610214 | up | family with sequence similarity 114, member A1                           |
| 7918223 | C1orf59          | 1.7606351 | up | chromosome 1 open reading frame 59                                       |

## Supplemental Table 1b

eMSC vs. eEN

|         |           |           |    |                                                           |
|---------|-----------|-----------|----|-----------------------------------------------------------|
| 8133818 | PHTF2     | 1.7596807 | up | putative homeodomain transcription factor 2               |
| 7939314 | EHF       | 1.75848   | up | ets homologous factor                                     |
| 8020898 | ZNF271    | 1.7578791 | up | zinc finger protein 271                                   |
| 7923453 | JARID1B   | 1.756447  | up | jumonji, AT rich interactive domain 1B                    |
| 8042737 | ALMS1     | 1.7542024 | up | Alstrom syndrome 1                                        |
| 7929689 | MARVELD1  | 1.7530203 | up | MARVEL domain containing 1                                |
| 8114653 | TAF7      | 1.7515823 | up |                                                           |
| 8036252 | CLIP3     | 1.7498376 | up | CAP-GLY domain containing linker protein 3                |
| 8042270 | UGP2      | 1.7472484 | up | UDP-glucose pyrophosphorylase 2                           |
| 8030007 | EMP3      | 1.7469544 | up | epithelial membrane protein 3                             |
| 8040365 | TRIB2     | 1.7464998 | up | tribbles homolog 2 (Drosophila)                           |
| 7927799 | REEP3     | 1.745845  | up | receptor accessory protein 3                              |
| 7939137 | EIF3M     | 1.7457753 | up | eukaryotic translation initiation factor 3, subunit M     |
| 8077513 | THUMPD3   | 1.7436866 | up | THUMP domain containing 3                                 |
| 7934278 | P4HA1     | 1.7431874 | up | procollagen-proline, 2-oxoglutarate 4-dioxygenase (prolin |
| 7936567 | RAB11FIP2 | 1.7419652 | up | RAB11 family interacting protein 2 (class I)              |
| 8161056 | TLN1      | 1.741661  | up | talin 1                                                   |
| 7909027 | NFASC     | 1.7388827 | up | neurofascin homolog (chicken)                             |
| 7977497 | CCNB1IP1  | 1.7388226 | up | cyclin B1 interacting protein 1                           |
| 8116859 | TMEM14C   | 1.7383395 | up | transmembrane protein 14C                                 |
| 7984813 | ISLR      | 1.738146  | up | immunoglobulin superfamily containing leucine-rich repe   |
| 8122660 | UST       | 1.7381421 | up | uronyl-2-sulfotransferase                                 |
| 7899939 | GJA4      | 1.7357072 | up | gap junction protein, alpha 4, 37kDa                      |
| 8156601 | C9orf102  | 1.7336236 | up | chromosome 9 open reading frame 102                       |
| 8095139 | SRD5A3    | 1.7334881 | up | steroid 5 alpha-reductase 3                               |
| 8008969 | TBX2      | 1.7321483 | up | T-box 2                                                   |
| 7976160 | TDP1      | 1.7314787 | up | tyrosyl-DNA phosphodiesterase 1                           |
| 7925229 | B3GALNT2  | 1.7298194 | up | beta-1,3-N-acetylgalactosaminyltransferase 2              |
| 8171837 | KLHL15    | 1.7265447 | up | kelch-like 15 (Drosophila)                                |
| 7922268 | KIFAP3    | 1.725297  | up | kinesin-associated protein 3                              |
| 8127854 | ME1       | 1.7252966 | up | malic enzyme 1, NADP(+)-dependent, cytosolic              |
| 8089759 | TMEM39A   | 1.7215698 | up | transmembrane protein 39A                                 |
| 7974229 | KLHDC2    | 1.7214189 | up | kelch domain containing 2                                 |

## Supplemental Table 1b

eMSC vs. eEN

|         |             |           |    |                                                                  |
|---------|-------------|-----------|----|------------------------------------------------------------------|
| 8122348 | VTA1        | 1.7213922 | up | Vps20-associated 1 homolog ( <i>S. cerevisiae</i> )              |
| 8094456 | LOC389203   | 1.720245  | up | hypothetical gene supported by BC032431                          |
| 8008564 | OK/KNS-CL.3 | 1.7196785 | up |                                                                  |
| 7914218 | TAF12       | 1.7195872 | up |                                                                  |
| 8126135 | GLO1        | 1.718371  | up | glyoxalase I                                                     |
| 7917199 | TTLL7       | 1.7171491 | up | tubulin tyrosine ligase-like family, member 7                    |
| 8145055 | BMP1        | 1.716725  | up | bone morphogenetic protein 1                                     |
| 8044133 | NCK2        | 1.7151567 | up | NCK adaptor protein 2                                            |
| 8121601 | FAM26E      | 1.7150546 | up | family with sequence similarity 26, member E                     |
| 8090277 | OSBPL11     | 1.7137263 | up | oxysterol binding protein-like 11                                |
| 7968516 | PDS5B       | 1.7135239 | up | PDS5, regulator of cohesion maintenance, homolog B ( <i>S. c</i> |
| 8142194 | LAMB1       | 1.7126809 | up | laminin, beta 1                                                  |
| 8091446 | PFN2        | 1.7104732 | up | profilin 2                                                       |
| 8172035 | DYNLT3      | 1.7099148 | up | dynein, light chain, Tctex-type 3                                |
| 8117594 | HIST1H2BM   | 1.7088492 | up | histone cluster 1, H2bm                                          |
| 7945245 | HNT         | 1.7078651 | up | neurotrimin                                                      |
| 8091078 | RBP1        | 1.7074453 | up | retinol binding protein 1, cellular                              |
| 7933933 | DNAJC12     | 1.7072235 | up | DnaJ (Hsp40) homolog, subfamily C, member 12                     |
| 8120239 | TMEM14A     | 1.7055631 | up | transmembrane protein 14A                                        |
| 7973826 | NUBPL       | 1.7038541 | up | nucleotide binding protein-like                                  |
| 7970624 | CENPJ       | 1.7034634 | up | centromere protein J                                             |
| 8121927 | RNF146      | 1.7032088 | up | ring finger protein 146                                          |
| 7918622 | SLC16A1     | 1.7026842 | up | solute carrier family 16, member 1 (monocarboxylic acid t        |
| 8040655 | SELI        | 1.7026229 | up | selenoprotein I                                                  |
| 8037430 | ZNF404      | 1.7021723 | up | zinc finger protein 404                                          |
| 8001423 | RPGRIP1L    | 1.7011544 | up | RPGRIP1-like                                                     |
| 8061227 | SLC24A3     | 1.7010183 | up | solute carrier family 24 (sodium/potassium/calcium excha         |
| 8042942 | HK2         | 1.6995534 | up | hexokinase 2                                                     |
| 8122818 | C6orf211    | 1.6989648 | up | chromosome 6 open reading frame 211                              |
| 8097388 | LARP2       | 1.6981344 | up | La ribonucleoprotein domain family, member 2                     |
| 7952205 | MCAM        | 1.6960707 | up | melanoma cell adhesion molecule                                  |
| 8018966 | TIMP2       | 1.6940337 | up | TIMP metalloproteinase inhibitor 2                               |
| 8127094 | GSTA4       | 1.6939518 | up | glutathione S-transferase A4                                     |

## Supplemental Table 1b

eMSC vs. eEN

|         |                |           |    |                                                           |
|---------|----------------|-----------|----|-----------------------------------------------------------|
| 7957570 | PLXNC1         | 1.6937612 | up | plexin C1                                                 |
| 8154416 | C9orf93        | 1.6920223 | up | chromosome 9 open reading frame 93                        |
| 8097529 | ELMOD2         | 1.6919516 | up | ELMO/CED-12 domain containing 2                           |
| 7927876 | TET1           | 1.6905663 | up | tet oncogene 1                                            |
| 8168589 | ZNF711         | 1.6892453 | up | zinc finger protein 711                                   |
| 8023497 | ATP8B1         | 1.6875529 | up | ATPase, class I, type 8B, member 1                        |
| 7958211 | C12orf45       | 1.6873863 | up | chromosome 12 open reading frame 45                       |
| 7922162 | SLC19A2        | 1.6842902 | up | solute carrier family 19 (thiamine transporter), member 2 |
| 8097867 | KIAA0922       | 1.6840934 | up |                                                           |
| 8074168 | FLJ39632       | 1.683421  | up | hypothetical LOC642477                                    |
| 7961440 | FLJ22662       | 1.6834149 | up |                                                           |
| 8120431 | PTP4A1         | 1.683054  | up | protein tyrosine phosphatase type IVA, member 1           |
| 7932554 | ARHGAP21       | 1.6825569 | up | Rho GTPase activating protein 21                          |
| 8138602 | DFNA5          | 1.6825422 | up | deafness, autosomal dominant 5                            |
| 8061035 | MACROD2        | 1.682076  | up | MACRO domain containing 2                                 |
| 7977452 | FLJ39632       | 1.6819807 | up | hypothetical LOC642477                                    |
| 8024111 | CNN2           | 1.6809051 | up | calponin 2                                                |
| 8088491 | CADPS          | 1.6795446 | up | Ca <sup>2+</sup> -dependent secretion activator           |
| 7928671 | C10orf57       | 1.6780819 | up | chromosome 10 open reading frame 57                       |
| 8026407 | SYDE1          | 1.6766487 | up | synapse defective 1, Rho GTPase, homolog 1 (C. elegans)   |
| 8156897 | C9orf30 TMEFF1 | 1.6755042 | up | chromosome 9 open reading frame 30   transmembrane        |
| 7962058 | TMTC1          | 1.6753321 | up | transmembrane and tetratricopeptide repeat containing 1   |
| 8086555 | LZTFL1         | 1.6750239 | up | leucine zipper transcription factor-like 1                |
| 8099121 | STX18          | 1.6746379 | up | syntaxin 18                                               |
| 8042223 | EHBP1          | 1.674521  | up | EH domain binding protein 1                               |
| 8100145 | COMMD8         | 1.6742675 | up | COMM domain containing 8                                  |
| 7962312 | ABCD2          | 1.674267  | up | ATP-binding cassette, sub-family D (ALD), member 2        |
| 8047127 | MYO1B          | 1.6724898 | up | myosin IB                                                 |
| 8082869 | PPP2R3A        | 1.669564  | up | protein phosphatase 2 (formerly 2A), regulatory subunit B |
| 8103092 | LOC100129572   | 1.6691438 | up |                                                           |
| 8121144 | MANEA          | 1.6691283 | up | mannosidase, endo-alpha                                   |
| 8113773 | ALDH7A1        | 1.6690428 | up | aldehyde dehydrogenase 7 family, member A1                |
| 8169145 | MUM1L1         | 1.668662  | up | melanoma associated antigen (mutated) 1-like 1            |

## Supplemental Table 1b

eMSC vs. eEN

|         |                 |           |    |                                                         |
|---------|-----------------|-----------|----|---------------------------------------------------------|
| 8148280 | SQLE            | 1.6663609 | up | squalene epoxidase                                      |
| 7911155 | SCCPDH          | 1.6659365 | up | saccharopine dehydrogenase (putative)                   |
| 8013341 | MFAP4           | 1.6658857 | up | microfibrillar-associated protein 4                     |
| 7971159 | TNAP            | 1.6656728 | up | TRAFs and NIK-associated protein                        |
| 7962375 | PRICKLE1        | 1.6605753 | up | prickle homolog 1 (Drosophila)                          |
| 7971486 | C13orf18 LOC728 | 1.6586143 | up | chromosome 13 open reading frame 18   hypothetical LO   |
| 7933186 | ZNF32           | 1.6583251 | up | zinc finger protein 32                                  |
| 7939411 | C11orf74        | 1.6568905 | up | chromosome 11 open reading frame 74                     |
| 8046020 | SCN2A           | 1.6549723 | up | sodium channel, voltage-gated, type II, alpha subunit   |
| 7983763 | MAPK6           | 1.653764  | up | mitogen-activated protein kinase 6                      |
| 8107942 | RAD50           | 1.6534342 | up |                                                         |
| 8148124 | MTBP            | 1.6529944 | up | Mdm2, transformed 3T3 cell double minute 2, p53 binding |
| 7936673 | RGS10           | 1.6529828 | up | regulator of G-protein signaling 10                     |
| 8106393 | F2R             | 1.6507386 | up | coagulation factor II (thrombin) receptor               |
| 7983191 | ADAL            | 1.650393  | up | adenosine deaminase-like                                |
| 8167973 | HEPH            | 1.650063  | up | hephaestin                                              |
| 8102214 | PAPSS1          | 1.6498452 | up | 3'-phosphoadenosine 5'-phosphosulfate synthase 1        |
| 7932796 | SVIL            | 1.6488696 | up | supervillin                                             |
| 8112967 | TMEM167         | 1.6481348 | up | transmembrane protein 167                               |
| 8152222 | AZIN1           | 1.6475309 | up | antizyme inhibitor 1                                    |
| 8147580 | VPS13B          | 1.6456735 | up | vacuolar protein sorting 13 homolog B (yeast)           |
| 7918255 | CLCC1           | 1.6454108 | up | chloride channel CLIC-like 1                            |
| 8027402 | CCNE1           | 1.6439681 | up | cyclin E1                                               |
| 8006820 | LASP1           | 1.6437551 | up | LIM and SH3 protein 1                                   |
| 8066513 | SDC4            | 1.6428791 | up | syndecan 4                                              |
| 8047784 | ZDBF2           | 1.642878  | up | zinc finger, DBF-type containing 2                      |
| 7958000 | CHPT1           | 1.6428202 | up | choline phosphotransferase 1                            |
| 8123274 | MAP3K4          | 1.6426394 | up | mitogen-activated protein kinase kinase kinase 4        |
| 8059708 | SNORA75         | 1.6413705 | up | small nucleolar RNA, H/ACA box 75                       |
| 8131205 | SDK1            | 1.641338  | up | sidekick homolog 1, cell adhesion molecule (chicken)    |
| 8069574 | C21orf91        | 1.641065  | up | chromosome 21 open reading frame 91                     |
| 7908988 | SNRPE           | 1.6410167 | up | small nuclear ribonucleoprotein polypeptide E           |
| 7956856 | MSRB3           | 1.6408082 | up | methionine sulfoxide reductase B3                       |

## Supplemental Table 1b

eMSC vs. eEN

|         |                   |           |    |                                                               |
|---------|-------------------|-----------|----|---------------------------------------------------------------|
| 8147019 | C8orf70           | 1.6404066 | up | chromosome 8 open reading frame 70                            |
| 8167027 | RGN               | 1.6376361 | up | regucalcin (senescence marker protein-30)                     |
| 8098870 | SPON2             | 1.637176  | up | spondin 2, extracellular matrix protein                       |
| 8097435 | C4orf33           | 1.6348909 | up | chromosome 4 open reading frame 33                            |
| 8094342 | C4orf28           | 1.6336658 | up | chromosome 4 open reading frame 28                            |
| 7969288 | OLFM4             | 1.6335306 | up | olfactomedin 4                                                |
| 8162373 | OGN               | 1.6329194 | up | osteoglycin                                                   |
| 7925954 | NET1              | 1.6328648 | up | neuroepithelial cell transforming gene 1                      |
| 7908732 | IPO9              | 1.632182  | up | importin 9                                                    |
| 7919619 | HIST2H2AA3   HIST | 1.6316295 | up | histone cluster 2, H2aa3   histone cluster 2, H2aa4   histo   |
| 7952069 | C11orf60          | 1.631596  | up | chromosome 11 open reading frame 60                           |
| 7969576 | MIRHG1            | 1.6313314 | up | microRNA host gene (non-protein coding) 1                     |
| 8159850 | FLJ35024          | 1.6311772 | up | hypothetical LOC401491                                        |
| 8111286 | RNASEN            | 1.6304736 | up | ribonuclease type III, nuclear                                |
| 7905079 | HIST2H2AA3   HIST | 1.6304048 | up | histone cluster 2, H2aa3   histone cluster 2, H2aa4           |
| 7903803 | AHCYL1            | 1.6289908 | up | S-adenosylhomocysteine hydrolase-like 1                       |
| 7932132 | FRMD4A            | 1.6287345 | up | FERM domain containing 4A                                     |
| 8041519 | FAM82A            | 1.6280527 | up | family with sequence similarity 82, member A                  |
| 7961891 | BHLHB3            | 1.6277673 | up | basic helix-loop-helix domain containing, class B, 3          |
| 7987642 | NDUFAF1           | 1.6273612 | up | NADH dehydrogenase (ubiquinone) 1 alpha subcomplex, c         |
| 8152491 | EXT1              | 1.6250218 | up | exostoses (multiple) 1                                        |
| 8112081 | DHX29             | 1.6244116 | up | DEAH (Asp-Glu-Ala-His) box polypeptide 29                     |
| 8169073 | MGC39900   H2BF   | 1.6243275 | up | thymosin beta15b   H2B histone family, member X, pseud        |
| 7900395 | RLF               | 1.6231469 | up | rearranged L-myc fusion                                       |
| 8152962 | LRRC6             | 1.6223933 | up | leucine rich repeat containing 6                              |
| 8056327 | GRB14             | 1.6213012 | up | growth factor receptor-bound protein 14                       |
| 7938348 | WEE1              | 1.6201704 | up |                                                               |
| 7962327 | SLC2A13           | 1.6196272 | up | solute carrier family 2 (facilitated glucose transporter), me |
| 8116494 | ZFP62             | 1.6195779 | up | zinc finger protein 62 homolog (mouse)                        |
| 8066074 | DSN1              | 1.6195143 | up |                                                               |
| 7955063 | TMEM106C          | 1.6168102 | up | transmembrane protein 106C                                    |
| 8158183 | DNM1              | 1.6137059 | up | dynamin 1                                                     |
| 8138834 | FKBP14            | 1.613186  | up | FK506 binding protein 14, 22 kDa                              |

## Supplemental Table 1b

eMSC vs. eEN

|         |                  |           |    |                                                              |
|---------|------------------|-----------|----|--------------------------------------------------------------|
| 8129482 | SAMD3            | 1.6121933 | up | sterile alpha motif domain containing 3                      |
| 8107632 | SNX24            | 1.6115464 | up | sorting nexin 24                                             |
| 8157092 | TMEM38B          | 1.6106011 | up | transmembrane protein 38B                                    |
| 7972369 | UGCGL2           | 1.6094555 | up | UDP-glucose ceramide glucosyltransferase-like 2              |
| 7979204 | FERMT2           | 1.6086732 | up | fermitin family homolog 2 (Drosophila)                       |
| 7958346 | C12orf23         | 1.6085316 | up | chromosome 12 open reading frame 23                          |
| 8051928 | PREPL            | 1.608386  | up | prolyl endopeptidase-like                                    |
| 8051864 | hCG_1645220      | 1.6073661 | up | hCG1645220                                                   |
| 7925480 | FH               | 1.603454  | up | fumarate hydratase                                           |
| 8096314 | PKD2             | 1.6030371 | up | polycystic kidney disease 2 (autosomal dominant)             |
| 7922104 | GCSH LOC730107   | 1.601196  | up | glycine cleavage system protein H (aminomethyl carrier)      |
| 8010161 | 9-Sep            | 1.6004138 | up | septin 9                                                     |
| 8132557 | AEBP1            | 1.599827  | up | AE binding protein 1                                         |
| 8129497 | EPB41L2          | 1.5994246 | up | erythrocyte membrane protein band 4.1-like 2                 |
| 7953200 | CCND2            | 1.5992266 | up | cyclin D2                                                    |
| 8043909 | NPAS2            | 1.5987662 | up | neuronal PAS domain protein 2                                |
| 8132399 | C7orf36          | 1.5979302 | up | chromosome 7 open reading frame 36                           |
| 8112388 | TRIM23           | 1.5977955 | up | tripartite motif-containing 23                               |
| 7904693 | FLJ21272         | 1.5976168 | up |                                                              |
| 8174235 | TCEAL5           | 1.5975618 | up | transcription elongation factor A (SII)-like 5               |
| 7993458 | C16orf45         | 1.5975238 | up | chromosome 16 open reading frame 45                          |
| 7924166 | BATF3            | 1.5971713 | up | basic leucine zipper transcription factor, ATF-like 3        |
| 8046502 | SCRN3            | 1.5971017 | up | secernin 3                                                   |
| 8085033 | LMLN             | 1.5970654 | up | leishmanolysin-like (metallopeptidase M8 family)             |
| 8083000 | FAIM             | 1.595031  | up | Fas apoptotic inhibitory molecule                            |
| 8113726 | PPIC             | 1.5946329 | up | peptidylprolyl isomerase C (cyclophilin C)                   |
| 8124531 | HIST1H3I HIST1H2 | 1.5934799 | up | histone cluster 1, H3i   histone cluster 1, H2bn   histone c |
| 8041676 | DYNC2LI1         | 1.5931473 | up | dynein, cytoplasmic 2, light intermediate chain 1            |
| 7965156 | LIN7A            | 1.5924194 | up | lin-7 homolog A (C. elegans)                                 |
| 7954388 | GOLT1B           | 1.5916829 | up | golgi transport 1 homolog B (S. cerevisiae)                  |
| 8091737 | IFT80            | 1.5907187 | up | intraflagellar transport 80 homolog (Chlamydomonas)          |
| 7965918 | NT5DC3           | 1.590668  | up | 5'-nucleotidase domain containing 3                          |
| 8097307 | INTU             | 1.5889112 | up | inturned planar cell polarity effector homolog (Drosophila)  |

## Supplemental Table 1b

eMSC vs. eEN

|         |                 |           |    |                                                               |
|---------|-----------------|-----------|----|---------------------------------------------------------------|
| 7933092 | ZNF248          | 1.5882683 | up | zinc finger protein 248                                       |
| 7951077 | SESN3           | 1.587949  | up | sestrin 3                                                     |
| 8113097 | KIAA0825        | 1.5869929 | up |                                                               |
| 8144726 | TUSC3           | 1.5859534 | up | tumor suppressor candidate 3                                  |
| 8089867 | RABL3           | 1.5858407 | up | RAB, member of RAS oncogene family-like 3                     |
| 7944493 | CBL             | 1.5856375 | up | Cas-Br-M (murine) ecotropic retroviral transforming sequ      |
| 7910680 | GPR137B         | 1.58441   | up | G protein-coupled receptor 137B                               |
| 8065248 | LOC100130264    | 1.5838599 | up | similar to hCG2038397                                         |
| 7938890 | PRMT3           | 1.5838358 | up | protein arginine methyltransferase 3                          |
| 7980547 | SEL1L           | 1.5836039 | up | sel-1 suppressor of lin-12-like ( <i>C. elegans</i> )         |
| 8102713 | NUDT6           | 1.5833395 | up | nudix (nucleoside diphosphate linked moiety X)-type moti      |
| 8075310 | LIF             | 1.5817744 | up | leukemia inhibitory factor (cholinergic differentiation fact  |
| 7971124 | UFM1            | 1.578302  | up | ubiquitin-fold modifier 1                                     |
| 8147101 | E2F5            | 1.5764525 | up | E2F transcription factor 5, p130-binding                      |
| 7977409 | CRIP1 LOC100127 | 1.5750898 | up | cysteine-rich protein 1 (intestinal)   hypothetical protein l |
| 7964388 | NDUFA4L2        | 1.5749445 | up | NADH dehydrogenase (ubiquinone) 1 alpha subcomplex, 4         |
| 8173059 | WNK3            | 1.5745622 | up | WNK lysine deficient protein kinase 3                         |
| 8114829 | YIPF5           | 1.5736969 | up | Yip1 domain family, member 5                                  |
| 7927267 | FAM35A          | 1.572933  | up | family with sequence similarity 35, member A                  |
| 7990636 | C15orf5         | 1.5703292 | up | chromosome 15 open reading frame 5                            |
| 8108238 | SMAD5           | 1.5694219 | up | SMAD family member 5                                          |
| 8128123 | RRAGD           | 1.5684764 | up | Ras-related GTP binding D                                     |
| 8045587 | ACVR2A          | 1.5671169 | up | activin A receptor, type IIA                                  |
| 8027254 | ZNF90           | 1.5662762 | up | zinc finger protein 90                                        |
| 8114778 | GCSH LOC730107  | 1.5658228 | up | glycine cleavage system protein H (aminomethyl carrier)       |
| 8035980 | RHPN2           | 1.565693  | up | rhopilin, Rho GTPase binding protein 2                        |
| 8011945 | KIAA0753        | 1.5652827 | up |                                                               |
| 7976818 | SNORD114-6      | 1.564443  | up | small nucleolar RNA, C/D box 114-6                            |
| 8002999 | GCSH LOC730107  | 1.5644186 | up | glycine cleavage system protein H (aminomethyl carrier)       |
| 8048205 | IGFBP2          | 1.5640637 | up | insulin-like growth factor binding protein 2, 36kDa           |
| 7909568 | DTL             | 1.5635216 | up | denticleless homolog ( <i>Drosophila</i> )                    |
| 7954613 | CCDC91          | 1.5622635 | up | coiled-coil domain containing 91                              |
| 8093258 | IQCG            | 1.561343  | up | IQ motif containing G                                         |



## Supplemental Table 1b

eMSC vs. eEN

|         |                 |           |    |                                                                              |
|---------|-----------------|-----------|----|------------------------------------------------------------------------------|
| 7962842 | ADCY6           | 1.5611638 | up | adenylate cyclase 6                                                          |
| 7928944 | PAPSS2          | 1.5609595 | up | 3'-phosphoadenosine 5'-phosphosulfate synthase 2                             |
| 7963054 | TUBA1A          | 1.5609523 | up | tubulin, alpha 1a                                                            |
| 8126784 | PLA2G7          | 1.5609336 | up | phospholipase A2, group VII (platelet-activating factor acetylhydrolase IIc) |
| 7901140 | MAST2           | 1.5603023 | up | microtubule associated serine/threonine kinase 2                             |
| 8113623 | TICAM2 TMED7    | 1.5602158 | up | toll-like receptor adaptor molecule 2   transmembrane protein 2              |
| 7968154 | ATP8A2          | 1.5601913 | up | ATPase, aminophospholipid transporter-like, class I, type 8A2                |
| 8147313 | TMEM67          | 1.558858  | up | transmembrane protein 67                                                     |
| 8033667 | ZNF558          | 1.5576869 | up | zinc finger protein 558                                                      |
| 8102655 | BBS7            | 1.5567236 | up | Bardet-Biedl syndrome 7                                                      |
| 7974781 | PPM1A           | 1.5557835 | up | protein phosphatase 1A (formerly 2C), magnesium-dependent                    |
| 8108729 | PCDHB11         | 1.5548749 | up | protocadherin beta 11                                                        |
| 8088339 | ARF4            | 1.554063  | up | ADP-ribosylation factor 4                                                    |
| 7937335 | IFITM1          | 1.553923  | up | interferon induced transmembrane protein 1 (9-27)                            |
| 8046604 | AGPS            | 1.5537748 | up | alkylglycerone phosphate synthase                                            |
| 8132897 | LANCL2          | 1.5531293 | up | LanC lantibiotic synthetase component C-like 2 (bacterial)                   |
| 7898957 | RCAN3           | 1.5522586 | up | RCAN family member 3                                                         |
| 8117422 | HIST1H4F HIST4H | 1.5522348 | up | histone cluster 1, H4f   histone cluster 4, H4   histone cluster 4           |
| 8030383 | RCN3            | 1.5512613 | up | reticulocalbin 3, EF-hand calcium binding domain                             |
| 8113039 | MEF2C           | 1.5510205 | up | myocyte enhancer factor 2C                                                   |
| 7960411 | C12orf4         | 1.550383  | up | chromosome 12 open reading frame 4                                           |
| 8129273 | C6orf170        | 1.5501804 | up | chromosome 6 open reading frame 170                                          |
| 8130129 | NUP43           | 1.5492897 | up | nucleoporin 43kDa                                                            |
| 8107164 | HISPPD1         | 1.5483356 | up | histidine acid phosphatase domain containing 1                               |
| 8081375 | FAM55C          | 1.5478679 | up | family with sequence similarity 55, member C                                 |
| 7934870 | ATAD1           | 1.5474591 | up | ATPase family, AAA domain containing 1                                       |
| 8090630 | TMCC1           | 1.5470622 | up | transmembrane and coiled-coil domain family 1                                |
| 7926385 | STAM            | 1.5468967 | up | signal transducing adaptor molecule (SH3 domain and ITAM domain)             |
| 8135594 | CAV1            | 1.5468752 | up | caveolin 1, caveolae protein, 22kDa                                          |
| 7942957 | PRSS23          | 1.546705  | up | protease, serine, 23                                                         |
| 8021181 | SCARNA17        | 1.5459481 | up | small Cajal body-specific RNA 17                                             |
| 8132439 | C7orf10         | 1.5443417 | up | chromosome 7 open reading frame 10                                           |
| 7935776 | PRO1933         | 1.5436534 | up |                                                                              |

## Supplemental Table 1b

eMSC vs. eEN

|         |                 |           |    |                                                              |
|---------|-----------------|-----------|----|--------------------------------------------------------------|
| 8046680 | PLEKHA3         | 1.5424887 | up | pleckstrin homology domain containing, family A (phospho     |
| 8044008 | IL1RL2          | 1.5423032 | up | interleukin 1 receptor-like 2                                |
| 7946142 | PRKCDBP         | 1.5417442 | up | protein kinase C, delta binding protein                      |
| 8097586 | GAB1            | 1.5412208 | up | GRB2-associated binding protein 1                            |
| 8021470 | PMAIP1          | 1.5407512 | up | phorbol-12-myristate-13-acetate-induced protein 1            |
| 7918973 | SPAG17          | 1.540527  | up | sperm associated antigen 17                                  |
| 8128818 | WASF1           | 1.5404946 | up | WAS protein family, member 1                                 |
| 8085999 | CMTM6           | 1.5403528 | up | CKLF-like MARVEL transmembrane domain containing 6           |
| 7948896 | SNORD22 SNHG1   | 1.5373441 | up | small nucleolar RNA, C/D box 22   small nucleolar RNA ho     |
| 8140170 | GTF2IRD2 GTF2IR | 1.5368454 | up | GTF2I repeat domain containing 2   GTF2I repeat domain       |
| 7976084 | SPATA7          | 1.5366554 | up | spermatogenesis associated 7                                 |
| 8129379 | ECHDC1          | 1.5364823 | up | enoyl Coenzyme A hydratase domain containing 1               |
| 8060940 | C20orf103       | 1.5362123 | up | chromosome 20 open reading frame 103                         |
| 8041940 | STON1-GTF2A1L   | 1.5361357 | up |                                                              |
| 8089830 | LRR58           | 1.5354098 | up | leucine rich repeat containing 58                            |
| 7984686 | BBS4            | 1.5352365 | up | Bardet-Biedl syndrome 4                                      |
| 8117630 | ZNF165          | 1.5346469 | up | zinc finger protein 165                                      |
| 8047356 | NIF3L1          | 1.5333555 | up | NIF3 NGG1 interacting factor 3-like 1 (S. pombe)             |
| 8080847 | C3orf14         | 1.5325297 | up | chromosome 3 open reading frame 14                           |
| 8090433 | MGLL            | 1.5323877 | up | monoglyceride lipase                                         |
| 8101723 | NAP1L5          | 1.5319291 | up | nucleosome assembly protein 1-like 5                         |
| 7973036 | PARP2           | 1.5311712 | up | poly (ADP-ribose) polymerase family, member 2                |
| 8010078 | SNORD1C         | 1.5301504 | up | small nucleolar RNA, C/D box 1C                              |
| 8003298 | SLC7A5          | 1.5294734 | up | solute carrier family 7 (cationic amino acid transporter, y+ |
| 7919226 | POLR3C          | 1.5292271 | up | polymerase (RNA) III (DNA directed) polypeptide C (62kD)     |
| 8008566 | STXBP4          | 1.5278072 | up | syntaxin binding protein 4                                   |
| 8091260 | SLC9A9          | 1.5276299 | up | solute carrier family 9 (sodium/hydrogen exchanger), mer     |
| 7984364 | SMAD3           | 1.5264275 | up | SMAD family member 3                                         |
| 8123303 | PACRG           | 1.5262055 | up | PARK2 co-regulated                                           |
| 8053315 | LRRTM4          | 1.5258245 | up | leucine rich repeat transmembrane neuronal 4                 |
| 8074969 | DDT             | 1.5254796 | up | D-dopachrome tautomerase                                     |
| 7944722 | UBASH3B         | 1.52514   | up | ubiquitin associated and SH3 domain containing, B            |
| 8120362 | C6orf65         | 1.5234783 | up | chromosome 6 open reading frame 65                           |

## Supplemental Table 1b

eMSC vs. eEN

|         |                 |           |    |                                                              |
|---------|-----------------|-----------|----|--------------------------------------------------------------|
| 8102065 | BDH2            | 1.5227777 | up | 3-hydroxybutyrate dehydrogenase, type 2                      |
| 7901479 | ZYG11B          | 1.5222399 | up | zyg-11 homolog B (C. elegans)                                |
| 8107859 | LYRM7           | 1.5213344 | up | Lym7 homolog (mouse)                                         |
| 8075182 | XBP1            | 1.5211945 | up | X-box binding protein 1                                      |
| 7978666 | MBIP            | 1.5189638 | up | MAP3K12 binding inhibitory protein 1                         |
| 7928354 | FAM149B1        | 1.5182256 | up | family with sequence similarity 149, member B1               |
| 7932082 | CCDC3           | 1.5181006 | up | coiled-coil domain containing 3                              |
| 8173933 | PCDH19          | 1.5177    | up | protocadherin 19                                             |
| 8016390 | COPZ2           | 1.5167905 | up | coatamer protein complex, subunit zeta 2                     |
| 8140915 | PEX1            | 1.516462  | up | peroxisome biogenesis factor 1                               |
| 7999468 | LITAF           | 1.5159705 | up | lipopolysaccharide-induced TNF factor                        |
| 8124430 | HIST1H1D        | 1.5153223 | up | histone cluster 1, H1d                                       |
| 8038998 | ZNF468          | 1.514819  | up | zinc finger protein 468                                      |
| 8101086 | NAAA            | 1.5147839 | up | N-acylethanolamine acid amidase                              |
| 7969228 | ALG11 UTP14C    | 1.5143709 | up | asparagine-linked glycosylation 11 homolog (S. cerevisiae,   |
| 8105353 | SKIV2L2         | 1.5140209 | up | superkiller viralicidic activity 2-like 2 (S. cerevisiae)    |
| 7924773 | CDC42BPA        | 1.5127022 | up | CDC42 binding protein kinase alpha (DMPK-like)               |
| 7954631 | MLSTD1          | 1.5118359 | up | male sterility domain containing 1                           |
| 8144528 | TNKS            | 1.5113797 | up | tankyrase, TRF1-interacting ankyrin-related ADP-ribose pc    |
| 7915870 | ATPAF1          | 1.5107054 | up | ATP synthase mitochondrial F1 complex assembly factor 1      |
| 8170891 | GDI1            | 1.5106208 | up | GDP dissociation inhibitor 1                                 |
| 7969935 | ERCC5           | 1.5099567 | up | excision repair cross-complementing rodent repair deficie    |
| 7977933 | SLC7A8          | 1.5091356 | up | solute carrier family 7 (cationic amino acid transporter, y+ |
| 7966321 | GPN3            | 1.50903   | up | GPN-loop GTPase 3                                            |
| 8128650 | SEC63           | 1.508249  | up |                                                              |
| 8117402 | HIST1H4E HIST4H | 1.5082402 | up | histone cluster 1, H4e   histone cluster 4, H4   histone clu |
| 7989670 | RBPM52          | 1.5065515 | up | RNA binding protein with multiple splicing 2                 |
| 8133549 | GTF2IRD2 GTF2IR | 1.5061748 | up | GTF2I repeat domain containing 2   GTF2I repeat domain       |
| 7965064 | OSBPL8          | 1.506165  | up | oxysterol binding protein-like 8                             |
| 8137264 | TMEM176A        | 1.503396  | up | transmembrane protein 176A                                   |
| 7948612 | FADS1 FADS3     | 1.5023755 | up | fatty acid desaturase 1   fatty acid desaturase 3            |
| 7931281 | FANK1           | 1.5020711 | up | fibronectin type III and ankyrin repeat domains 1            |
| 8109194 | SLC26A2         | 1.5014122 | up | solute carrier family 26 (sulfate transporter), member 2     |

## Supplemental Table 1b

eMSC vs. eEN

|         |               |           |    |                                                                 |
|---------|---------------|-----------|----|-----------------------------------------------------------------|
| 8094476 | TBC1D19       | 1.5005277 | up | TBC1 domain family, member 19                                   |
| 8099912 | C4orf34       | 1.5004555 | up | chromosome 4 open reading frame 34                              |
| 7915926 | STIL          | 1.5002669 | up | SCL/TAL1 interrupting locus                                     |
| 8114050 | 8-Sep         | 1.4986658 | up | septin 8                                                        |
| 8140556 | HGF           | 1.4985689 | up | hepatocyte growth factor (hepapoietin A; scatter factor)        |
| 7978718 | SEC23A        | 1.4981906 | up | Sec23 homolog A ( <i>S. cerevisiae</i> )                        |
| 7953564 | C12orf57      | 1.4981282 | up | chromosome 12 open reading frame 57                             |
| 8005235 | M-RIP         | 1.4975746 | up | myosin phosphatase-Rho interacting protein                      |
| 7904853 | GPR89C GPR89A | 1.4971049 | up | G protein-coupled receptor 89C   G protein-coupled receptor 89A |
| 7984112 | RAB8B         | 1.4970806 | up |                                                                 |
| 7943498 | DYNC2H1       | 1.496817  | up | dynein, cytoplasmic 2, heavy chain 1                            |
| 8000574 | NUPR1         | 1.4963411 | up | nuclear protein 1                                               |
| 8097449 | PCDH10        | 1.4962604 | up | protocadherin 10                                                |
| 8135378 | PRKAR2B       | 1.4957    | up | protein kinase, cAMP-dependent, regulatory, type II, beta       |
| 7944803 | LOH11CR2A     | 1.4950984 | up | loss of heterozygosity, 11, chromosomal region 2, gene A        |
| 8009255 | CCDC45        | 1.4945987 | up | coiled-coil domain containing 45                                |
| 8147079 | LRRCC1        | 1.4922957 | up | leucine rich repeat and coiled-coil domain containing 1         |
| 8093053 | TFRC          | 1.4920214 | up | transferrin receptor (p90, CD71)                                |
| 8151254 | NCOA2         | 1.4918009 | up | nuclear receptor coactivator 2                                  |
| 8157058 | FSD1L         | 1.4897517 | up | fibronectin type III and SPRY domain containing 1-like          |
| 7927631 | DKK1          | 1.4897147 | up | dickkopf homolog 1 ( <i>Xenopus laevis</i> )                    |
| 7900555 | RP4-692D3.1   | 1.4888867 | up | hypothetical protein LOC728621                                  |
| 7916356 | C1orf41       | 1.4884669 | up | chromosome 1 open reading frame 41                              |
| 8108753 | PCDHB15       | 1.4884356 | up | protocadherin beta 15                                           |
| 8050507 | WDR35         | 1.4877563 | up | WD repeat domain 35                                             |
| 8044127 | C2orf49       | 1.4868965 | up | chromosome 2 open reading frame 49                              |
| 8102587 | C4orf31       | 1.4868798 | up | chromosome 4 open reading frame 31                              |
| 8121525 | KIAA1919      | 1.4867059 | up |                                                                 |
| 7964810 | MDM1          | 1.4858654 | up | Mdm1 nuclear protein homolog (mouse)                            |
| 8162313 | IARS          | 1.4858426 | up | isoleucyl-tRNA synthetase                                       |
| 7983173 | CCNDBP1       | 1.4858222 | up | cyclin D-type binding-protein 1                                 |
| 7964834 | CPM           | 1.485634  | up | carboxypeptidase M                                              |
| 7961767 | KIAA0528      | 1.4854782 | up |                                                                 |

## Supplemental Table 1b

eMSC vs. eEN

|         |                 |           |    |                                                                         |
|---------|-----------------|-----------|----|-------------------------------------------------------------------------|
| 7951565 | ARHGAP20        | 1.4846442 | up | Rho GTPase activating protein 20                                        |
| 7966448 | TMEM116         | 1.4845537 | up | transmembrane protein 116                                               |
| 8042503 | MXD1            | 1.4833776 | up | MAX dimerization protein 1                                              |
| 8167835 | TRO             | 1.4828471 | up | trophinin                                                               |
| 8075673 | RBM9            | 1.4817793 | up | RNA binding motif protein 9                                             |
| 8050608 | C2orf43         | 1.4815437 | up | chromosome 2 open reading frame 43                                      |
| 8102848 | SETD7           | 1.4812638 | up | SET domain containing (lysine methyltransferase) 7                      |
| 8042402 | C2orf13 PROKR1  | 1.4803344 | up | chromosome 2 open reading frame 13   prokineticin receptor              |
| 8147206 | RIPK2           | 1.4796374 | up | receptor-interacting serine-threonine kinase 2                          |
| 7974771 | C14orf135 LOC10 | 1.4790982 | up | chromosome 14 open reading frame 135   hypothetical protein             |
| 8171313 | ARHGAP6         | 1.4781775 | up | Rho GTPase activating protein 6                                         |
| 8108099 | SEC24A          | 1.4776293 | up | SEC24 related gene family, member A ( <i>S. cerevisiae</i> )            |
| 8118409 | C4A C4B         | 1.4776076 | up | complement component 4A (Rodgers blood group)   complement component 4B |
| 8118455 | C4A C4B         | 1.47739   | up | complement component 4A (Rodgers blood group)   complement component 4B |
| 7946635 | ZBED5           | 1.477035  | up | zinc finger, BED-type containing 5                                      |
| 7908072 | LAMC2           | 1.4769216 | up | laminin, gamma 2                                                        |
| 7917370 | COL24A1         | 1.4764946 | up | collagen, type XXIV, alpha 1                                            |
| 8146533 | FAM110B         | 1.4748107 | up | family with sequence similarity 110, member B                           |
| 7968658 | EXOSC8          | 1.474547  | up | exosome component 8                                                     |
| 8095834 | SHROOM3         | 1.4738337 | up | shroom family member 3                                                  |
| 7969916 | BIVM            | 1.4723452 | up | basic, immunoglobulin-like variable motif containing                    |
| 8133983 | ADAM22          | 1.4720556 | up | ADAM metallopeptidase domain 22                                         |
| 8157804 | OLFML2A         | 1.470704  | up | olfactomedin-like 2A                                                    |
| 8043993 | UNQ9419         | 1.4701947 | up | AHPA9419                                                                |
| 7964347 | TMEM194         | 1.4693862 | up | transmembrane protein 194                                               |
| 7975676 | C14orf45        | 1.4692683 | up | chromosome 14 open reading frame 45                                     |
| 8097704 | TMEM34          | 1.469218  | up | transmembrane protein 34                                                |
| 8179399 | C4A C4B         | 1.4685934 | up | complement component 4A (Rodgers blood group)   complement component 4B |
| 8090678 | MRPL3           | 1.4685848 | up | mitochondrial ribosomal protein L3                                      |
| 8130765 | FAM103A1        | 1.4683206 | up | family with sequence similarity 103, member A1                          |
| 8054092 | TMEM131         | 1.4683145 | up | transmembrane protein 131                                               |
| 8001876 | NAE1            | 1.4666928 | up | NEDD8 activating enzyme E1 subunit 1                                    |
| 8098556 | CCDC111         | 1.4661099 | up | coiled-coil domain containing 111                                       |

Supplemental Table 1b  
eMSC vs. eEN

|         |                 |           |    |                                                              |
|---------|-----------------|-----------|----|--------------------------------------------------------------|
| 7952484 | LOC219854       | 1.4659117 | up |                                                              |
| 8068522 | TTC3            | 1.4656372 | up | tetratricopeptide repeat domain 3                            |
| 7980246 | MLH3            | 1.4655131 | up | mutL homolog 3 (E. coli)                                     |
| 7932530 | PIP4K2A         | 1.464496  | up | phosphatidylinositol-5-phosphate 4-kinase, type II, alpha    |
| 7971541 | SUCLA2          | 1.4643476 | up | succinate-CoA ligase, ADP-forming, beta subunit              |
| 8143040 | SLC35B4         | 1.4626882 | up | solute carrier family 35, member B4                          |
| 8113733 | CCDC100         | 1.4624404 | up | coiled-coil domain containing 100                            |
| 8140500 | TMEM60          | 1.4619188 | up | transmembrane protein 60                                     |
| 7986527 | C15orf51        | 1.4617845 | up | chromosome 15 open reading frame 51                          |
| 8157976 | GARNL3          | 1.4614326 | up | GTPase activating Rap/RanGAP domain-like 3                   |
| 8124385 | HIST1H4B HIST4H | 1.4611648 | up | histone cluster 1, H4b   histone cluster 4, H4   histone clu |
| 7986509 | LOC441734       | 1.4611379 | up | similar to hypothetical protein DKFZp43411020                |
| 8082643 | NEK11           | 1.4610437 | up | NIMA (never in mitosis gene a)- related kinase 11            |
| 8154254 | KIAA1432        | 1.4609227 | up |                                                              |
| 8012475 | MYH10           | 1.4609052 | up | myosin, heavy chain 10, non-muscle                           |
| 8094184 | C1QTNF7         | 1.4605445 | up | C1q and tumor necrosis factor related protein 7              |
| 7966135 | CORO1C          | 1.4602982 | up | coronin, actin binding protein, 1C                           |
| 7987145 | FMN1            | 1.4584888 | up | formin 1                                                     |
| 7967993 | FGF9            | 1.4582673 | up | fibroblast growth factor 9 (glia-activating factor)          |
| 8101624 | KLHL8           | 1.457568  | up | kelch-like 8 (Drosophila)                                    |
| 8096109 | MRPS18C         | 1.4575297 | up | mitochondrial ribosomal protein S18C                         |
| 8082750 | UBA5            | 1.4571472 | up | ubiquitin-like modifier activating enzyme 5                  |
| 8058147 | PPIL3           | 1.4566392 | up | peptidylprolyl isomerase (cyclophilin)-like 3                |
| 8052798 | AAK1            | 1.4563547 | up | AP2 associated kinase 1                                      |
| 7954810 | LRRK2           | 1.4557111 | up | leucine-rich repeat kinase 2                                 |
| 7988859 | GNB5            | 1.4552364 | up | guanine nucleotide binding protein (G protein), beta 5       |
| 8044278 | CCDC138         | 1.4548588 | up | coiled-coil domain containing 138                            |
| 7933733 | FAM13C1         | 1.4528834 | up | family with sequence similarity 13, member C1                |
| 8166219 | SYAP1           | 1.4523864 | up | synapse associated protein 1, SAP47 homolog (Drosophila)     |
| 8171024 | LOC401622       | 1.4522791 | up | similar to LINE-1 reverse transcriptase homolog              |
| 8168984 | BHLHB9          | 1.452184  | up | basic helix-loop-helix domain containing, class B, 9         |
| 7972750 | COL4A1          | 1.4518222 | up | collagen, type IV, alpha 1                                   |
| 7985044 | UBE2Q2          | 1.451115  | up | ubiquitin-conjugating enzyme E2Q family member 2             |

## Supplemental Table 1b

eMSC vs. eEN

|         |               |           |    |                                                             |
|---------|---------------|-----------|----|-------------------------------------------------------------|
| 7984588 | THSD4         | 1.4508963 | up | thrombospondin, type I, domain containing 4                 |
| 7916789 | WDR78         | 1.4504379 | up | WD repeat domain 78                                         |
| 8152656 | ZHX1 C8orf76  | 1.4503689 | up | zinc fingers and homeoboxes 1   chromosome 8 open rea       |
| 8036324 | ZNF260        | 1.4499766 | up | zinc finger protein 260                                     |
| 7942596 | SERPINH1      | 1.4493208 | up | serpin peptidase inhibitor, clade H (heat shock protein 47) |
| 7901336 | ALS2CR2       | 1.4491795 | up | amyotrophic lateral sclerosis 2 (juvenile) chromosome reg   |
| 8101126 | CXCL10        | 1.448495  | up | chemokine (C-X-C motif) ligand 10                           |
| 8137483 | FLJ16734      | 1.4484439 | up | hypothetical LOC641928                                      |
| 7937696 | LOC338651     | 1.4484208 | up |                                                             |
| 7926609 | BMI1          | 1.4483058 | up |                                                             |
| 7956697 | MON2          | 1.4477626 | up |                                                             |
| 8092726 | CLDN1         | 1.4471848 | up | claudin 1                                                   |
| 7948662 | SCGB1D4       | 1.4470826 | up | secretoglobin, family 1D, member 4                          |
| 8120967 | NT5E          | 1.4467194 | up | 5'-nucleotidase, ecto (CD73)                                |
| 7973770 | SCFD1         | 1.4465574 | up | sec1 family domain containing 1                             |
| 8123342 | FGFR1OP CCR6  | 1.4463013 | up | FGFR1 oncogene partner   chemokine (C-C motif) recepto      |
| 8121916 | RSPO3         | 1.4456718 | up | R-spondin 3 homolog ( <i>Xenopus laevis</i> )               |
| 8120165 | CENPQ         | 1.4447947 | up | centromere protein Q                                        |
| 8080781 | PXK           | 1.4444703 | up | PX domain containing serine/threonine kinase                |
| 7969414 | KLF5          | 1.4435148 | up | Kruppel-like factor 5 (intestinal)                          |
| 8157144 | C9orf6        | 1.4422244 | up | chromosome 9 open reading frame 6                           |
| 7919251 | GPR89B GPR89A | 1.4417872 | up | G protein-coupled receptor 89B   G protein-coupled recep    |
| 8041508 | QPCT          | 1.4394065 | up | glutaminyl-peptide cyclotransferase (glutaminyl cyclase)    |
| 7924351 | EPRS          | 1.4389335 | up | glutamyl-prolyl-tRNA synthetase                             |
| 8057732 | LOC100131211  | 1.438777  | up | similar to hCG1646803                                       |
| 8163672 | DIPAS         | 1.4374884 | up | DIPLA1-antisense expressed                                  |
| 8142415 | FLJ31818      | 1.4368485 | up |                                                             |
| 8058927 | TMBIM1        | 1.4368105 | up | transmembrane BAX inhibitor motif containing 1              |
| 7964997 | CAPS2         | 1.4361359 | up | calcyphosine 2                                              |
| 7915775 | IPP           | 1.436098  | up | intracisternal A particle-promoted polypeptide              |
| 7974587 | ACTR10        | 1.4352666 | up | actin-related protein 10 homolog ( <i>S. cerevisiae</i> )   |
| 7990879 | EFTUD1        | 1.4349682 | up | elongation factor Tu GTP binding domain containing 1        |
| 7985488 | FAM103A1      | 1.434779  | up | family with sequence similarity 103, member A1              |

## Supplemental Table 1b

eMSC vs. eEN

|         |                 |           |    |                                                            |
|---------|-----------------|-----------|----|------------------------------------------------------------|
| 8089993 | WDR5B           | 1.4346353 | up | WD repeat domain 5B                                        |
| 8083471 | SGEF            | 1.4341791 | up | Src homology 3 domain-containing guanine nucleotide ex     |
| 7954503 | MED21           | 1.4333324 | up | mediator complex subunit 21                                |
| 8097066 | KIAA1627        | 1.4333276 | up |                                                            |
| 8094408 | ANAPC4          | 1.43302   | up | anaphase promoting complex subunit 4                       |
| 7910611 | KCNK1           | 1.4327792 | up | potassium channel, subfamily K, member 1                   |
| 8081903 | C3orf15         | 1.4304885 | up | chromosome 3 open reading frame 15                         |
| 8138735 | HOXA5           | 1.4298441 | up | homeobox A5                                                |
| 7909236 | MAPKAPK2        | 1.429509  | up | mitogen-activated protein kinase-activated protein kinase  |
| 8111941 | HMGCS1          | 1.4294896 | up | 3-hydroxy-3-methylglutaryl-Coenzyme A synthase 1 (solu     |
| 7907079 | RCSD1           | 1.4291905 | up | RCSD domain containing 1                                   |
| 8039144 | TMC4            | 1.4291607 | up | transmembrane channel-like 4                               |
| 8108683 | PCDHB2          | 1.428805  | up | protocadherin beta 2                                       |
| 8136495 | TTC26           | 1.4285406 | up | tetratricopeptide repeat domain 26                         |
| 8080487 | PRKCD           | 1.4283608 | up | protein kinase C, delta                                    |
| 7903972 | ATP5F1          | 1.427441  | up | ATP synthase, H+ transporting, mitochondrial F0 complex,   |
| 7939329 | PDHX            | 1.427438  | up | pyruvate dehydrogenase complex, component X                |
| 8020267 | CEP192          | 1.4270886 | up | centrosomal protein 192kDa                                 |
| 7970111 | ARHGEF7         | 1.427082  | up | Rho guanine nucleotide exchange factor (GEF) 7             |
| 8156126 | RMI1            | 1.4267973 | up |                                                            |
| 7921014 | MEF2D           | 1.4259325 | up | myocyte enhancer factor 2D                                 |
| 8080562 | IL17RB          | 1.4252399 | up | interleukin 17 receptor B                                  |
| 8166049 | PRPS2           | 1.4232712 | up | phosphoribosyl pyrophosphate synthetase 2                  |
| 8076113 | RP1-199H16.1    | 1.4231066 | up | hypothetical LOC388900                                     |
| 7947553 | LRRC4C          | 1.4231038 | up | leucine rich repeat containing 4C                          |
| 8018082 | SLC39A11        | 1.4224991 | up | solute carrier family 39 (metal ion transporter), member 1 |
| 8001507 | BBS2            | 1.4219475 | up | Bardet-Biedl syndrome 2                                    |
| 8147172 | CPNE3           | 1.4219315 | up | copine III                                                 |
| 7905088 | HIST2H2AC BOLA: | 1.421095  | up | histone cluster 2, H2ac   bolA homolog 1 (E. coli)         |
| 8022646 | KCTD1           | 1.4207357 | up | potassium channel tetramerisation domain containing 1      |
| 7974542 | C14orf101       | 1.4198831 | up | chromosome 14 open reading frame 101                       |
| 7904930 | GPR89B GPR89A   | 1.4198104 | up | G protein-coupled receptor 89B   G protein-coupled rece    |
| 8062211 | BXDC1           | 1.419573  | up | brix domain containing 1                                   |



## Supplemental Table 1b

eMSC vs. eEN

|         |                  |           |    |                                                             |
|---------|------------------|-----------|----|-------------------------------------------------------------|
| 8114354 | NME5             | 1.4190644 | up | non-metastatic cells 5, protein expressed in (nucleoside-d  |
| 8127787 | IBTK             | 1.4189165 | up | inhibitor of Bruton agammaglobulinemia tyrosine kinase      |
| 7970033 | COL4A2           | 1.4183819 | up | collagen, type IV, alpha 2                                  |
| 8131539 | TMEM106B         | 1.416578  | up | transmembrane protein 106B                                  |
| 7909561 | C1orf97          | 1.4138018 | up | chromosome 1 open reading frame 97                          |
| 7954985 | TMEM117          | 1.413796  | up | transmembrane protein 117                                   |
| 7945873 | ZNF195           | 1.4132719 | up | zinc finger protein 195                                     |
| 8027354 | LOC388524        | 1.4119169 | up | ribosomal protein SA pseudogene                             |
| 7936891 | METTL10          | 1.4117932 | up | methyltransferase like 10                                   |
| 7980744 | RPS6KA5          | 1.411442  | up | ribosomal protein S6 kinase, 90kDa, polypeptide 5           |
| 8163775 | MEGF9            | 1.4114116 | up | multiple EGF-like-domains 9                                 |
| 8042066 | CCDC104          | 1.4112461 | up | coiled-coil domain containing 104                           |
| 8064967 | MKKS             | 1.4104887 | up | McKusick-Kaufman syndrome                                   |
| 8129181 | GOPC ROS1        | 1.4104124 | up | golgi associated PDZ and coiled-coil motif containing   c-r |
| 8157038 | SLC44A1          | 1.4082135 | up | solute carrier family 44, member 1                          |
| 8050537 | MATN3            | 1.4076514 | up | matrilin 3                                                  |
| 7948656 | FTH1             | 1.4076289 | up | ferritin, heavy polypeptide 1                               |
| 8121461 | CDC40            | 1.4070522 | up | cell division cycle 40 homolog ( <i>S. cerevisiae</i> )     |
| 8102720 | ANKRD50          | 1.4065002 | up | ankyrin repeat domain 50                                    |
| 7958158 | HCFC2            | 1.4058348 | up | host cell factor C2                                         |
| 7968787 | OR7E37P OR7E47   | 1.4041893 | up | olfactory receptor, family 7, subfamily E, member 37 pseu   |
| 8119184 | RNF8             | 1.4036722 | up | ring finger protein 8                                       |
| 7938629 | PDE3B            | 1.4030191 | up | phosphodiesterase 3B, cGMP-inhibited                        |
| 7909689 | SMYD2            | 1.4029318 | up | SET and MYND domain containing 2                            |
| 8121015 | C6orf165 SLC35A: | 1.4028364 | up | chromosome 6 open reading frame 165   solute carrier fa     |
| 7946365 | STK33            | 1.4027703 | up | serine/threonine kinase 33                                  |
| 7980742 | LOC283588        | 1.4024429 | up |                                                             |
| 7944302 | PHLDB1           | 1.4017289 | up | pleckstrin homology-like domain, family B, member 1         |
| 8073015 | KDEL3            | 1.4008865 | up | KDEL (Lys-Asp-Glu-Leu) endoplasmic reticulum protein ret    |
| 8015349 | KRT19            | 1.399952  | up | keratin 19                                                  |
| 7918008 | DBT              | 1.3997409 | up | dihydrolipoamide branched chain transacylase E2             |
| 8063000 | WFDC2            | 1.3993846 | up | WAP four-disulfide core domain 2                            |
| 8083616 | MLF1             | 1.3990053 | up | myeloid leukemia factor 1                                   |

## Supplemental Table 1b

eMSC vs. eEN

|         |                |           |    |                                                                        |
|---------|----------------|-----------|----|------------------------------------------------------------------------|
| 7932285 | C10orf97       | 1.3989946 | up | chromosome 10 open reading frame 97                                    |
| 7954717 | BICD1          | 1.3974352 | up | bicaudal D homolog 1 (Drosophila)                                      |
| 8168855 | ARMCX4         | 1.3970581 | up | armadillo repeat containing, X-linked 4                                |
| 8064415 | C20orf46       | 1.396548  | up | chromosome 20 open reading frame 46                                    |
| 7971241 | OR7E37P OR7E47 | 1.3957165 | up | olfactory receptor, family 7, subfamily E, member 37 pseudogene        |
| 7947496 | SLC1A2         | 1.395629  | up | solute carrier family 1 (glial high affinity glutamate transporter)    |
| 7965789 | ARL1           | 1.3939074 | up | ADP-ribosylation factor-like 1                                         |
| 7901895 | ATG4C          | 1.3931332 | up | ATG4 autophagy related 4 homolog C ( <i>S. cerevisiae</i> )            |
| 8085815 | TOP2B          | 1.3926146 | up | topoisomerase (DNA) II beta 180kDa                                     |
| 7930614 | NHLRC2         | 1.3924553 | up | NHL repeat containing 2                                                |
| 8113413 | NUDT12         | 1.3924251 | up | nudix (nucleoside diphosphate linked moiety X)-type motif 12           |
| 8099218 | PPP2R2C        | 1.3920369 | up | protein phosphatase 2 (formerly 2A), regulatory subunit B              |
| 7972713 | EFNB2          | 1.3917259 | up | ephrin-B2                                                              |
| 8007493 | ARL4D          | 1.3904572 | up | ADP-ribosylation factor-like 4D                                        |
| 8108693 | PCDHB4         | 1.3902036 | up | protocadherin beta 4                                                   |
| 7971246 | KIAA0564       | 1.390183  | up |                                                                        |
| 8093145 | C3orf34        | 1.3899596 | up | chromosome 3 open reading frame 34                                     |
| 8045887 | OR7E37P        | 1.3894676 | up | olfactory receptor, family 7, subfamily E, member 37 pseudogene        |
| 7943620 | ATM NPAT       | 1.3889908 | up | ataxia telangiectasia mutated   nuclear protein, ataxia-telangiectasia |
| 8175076 | ZNF280C        | 1.3888154 | up | zinc finger protein 280C                                               |
| 8023165 | HDHD2          | 1.3872824 | up | haloacid dehalogenase-like hydrolase domain containing 2               |
| 7950990 | SLC36A4        | 1.3870509 | up | solute carrier family 36 (proton/amino acid symporter), member 4       |
| 8115327 | SPARC          | 1.3865601 | up | secreted protein, acidic, cysteine-rich (osteonectin)                  |
| 7986049 | CRTC3          | 1.3858422 | up | CREB regulated transcription coactivator 3                             |
| 8121161 | KIAA0776       | 1.3849546 | up |                                                                        |
| 8083221 | PBX2           | 1.3828983 | up | pre-B-cell leukemia homeobox 2                                         |
| 7990700 | WDR61          | 1.3827225 | up | WD repeat domain 61                                                    |
| 7918457 | KCNA3          | 1.3826969 | up | potassium voltage-gated channel, shaker-related subfamily 3            |
| 8106516 | JMY            | 1.3815572 | up | junction-mediating and regulatory protein                              |
| 8123038 | GTF2H5         | 1.3810762 | up | general transcription factor IIH, polypeptide 5                        |
| 7916862 | GPR177         | 1.3805227 | up | G protein-coupled receptor 177                                         |
| 8058824 | MREG           | 1.3799897 | up | melanoregulin                                                          |
| 8088550 | PRICKLE2       | 1.3799591 | up | prickle homolog 2 (Drosophila)                                         |

## Supplemental Table 1b

eMSC vs. eEN

|         |                |           |    |                                                            |
|---------|----------------|-----------|----|------------------------------------------------------------|
| 8127903 | KIAA1009       | 1.3792998 | up |                                                            |
| 8122265 | TNFAIP3        | 1.379191  | up | tumor necrosis factor, alpha-induced protein 3             |
| 8165486 | TMEM203 LOC65: | 1.3781836 | up | transmembrane protein 203   hypothetical LOC653383         |
| 8163149 | PTPN3          | 1.3778771 | up | protein tyrosine phosphatase, non-receptor type 3          |
| 8099259 | AFAP1          | 1.3763336 | up | actin filament associated protein 1                        |
| 7919580 | LOC440570      | 1.3754478 | up |                                                            |
| 8058765 | FN1            | 1.374822  | up | fibronectin 1                                              |
| 8058373 | WDR12          | 1.37431   | up | WD repeat domain 12                                        |
| 7967863 | ZNF605         | 1.3734145 | up | zinc finger protein 605                                    |
| 7919596 | LOC440570      | 1.3726906 | up |                                                            |
| 7956522 | KIF5A          | 1.3725189 | up | kinesin family member 5A                                   |
| 7962112 | CAPRIN2        | 1.3723768 | up | caprin family member 2                                     |
| 7981320 | MEG3           | 1.3717384 | up | maternally expressed 3                                     |
| 7995206 | TGFB111        | 1.371536  | up | transforming growth factor beta 1 induced transcript 1     |
| 7967386 | MPHOSPH9       | 1.3712494 | up | M-phase phosphoprotein 9                                   |
| 8057045 | FKBP7          | 1.370233  | up | FK506 binding protein 7                                    |
| 8109926 | GABRP          | 1.3700622 | up | gamma-aminobutyric acid (GABA) A receptor, pi              |
| 8108166 | TXNDC15        | 1.3699996 | up | thioredoxin domain containing 15                           |
| 7933194 | CXCL12         | 1.3697807 | up | chemokine (C-X-C motif) ligand 12 (stromal cell-derived fa |
| 8076241 | MKL1           | 1.3695763 | up | megakaryoblastic leukemia (translocation) 1                |
| 8141872 | NAPEPLD        | 1.3695195 | up | N-acyl phosphatidylethanolamine phospholipase D            |
| 7930882 | FAM45A FAM45B  | 1.3687565 | up | family with sequence similarity 45, member A   family wit  |
| 8144669 | FDFT1          | 1.3679696 | up | farnesyl-diphosphate farnesyltransferase 1                 |
| 8092970 | APOD           | 1.3676301 | up | apolipoprotein D                                           |
| 8013906 | TWF1           | 1.3674499 | up | twinfilin, actin-binding protein, homolog 1 (Drosophila)   |
| 8058869 | TNS1           | 1.3673134 | up | tensin 1                                                   |
| 8140319 | HIP1           | 1.3664142 | up | huntingtin interacting protein 1                           |
| 8136516 | tcag7.1228     | 1.3659801 | up | hypothetical protein FLJ25778                              |
| 8061186 | SEC23B         | 1.3654232 | up | Sec23 homolog B ( <i>S. cerevisiae</i> )                   |
| 7979196 | GNPNAT1        | 1.3652252 | up | glucosamine-phosphate N-acetyltransferase 1                |
| 8044462 | TTL            | 1.3638617 | up | tubulin tyrosine ligase                                    |
| 8167998 | AR             | 1.3638353 | up | androgen receptor (dihydrotestosterone receptor; testicu   |
| 7985016 | SNX33          | 1.3637661 | up | sorting nexin 33                                           |

## Supplemental Table 1b

eMSC vs. eEN

|         |                 |           |    |                                                              |
|---------|-----------------|-----------|----|--------------------------------------------------------------|
| 8171823 | APOO            | 1.3632053 | up | apolipoprotein O                                             |
| 8120961 | C6orf117        | 1.3630135 | up | chromosome 6 open reading frame 117                          |
| 8145151 | SORBS3          | 1.362534  | up | sorbin and SH3 domain containing 3                           |
| 7991640 | TARSL2          | 1.3624642 | up | threonyl-tRNA synthetase-like 2                              |
| 7918467 | C1orf103        | 1.3623972 | up | chromosome 1 open reading frame 103                          |
| 8003814 | ASPA            | 1.361984  | up | aspartoacylase (Canavan disease)                             |
| 7983843 | TCF12           | 1.3614131 | up | transcription factor 12 (HTF4, helix-loop-helix transcriptio |
| 8055952 | NR4A2           | 1.3601993 | up | nuclear receptor subfamily 4, group A, member 2              |
| 7976571 | C14orf129       | 1.359659  | up | chromosome 14 open reading frame 129                         |
| 7984298 | DIS3L           | 1.3596315 | up | DIS3 mitotic control homolog ( <i>S. cerevisiae</i> )-like   |
| 7906085 | LMNA            | 1.359489  | up | lamin A/C                                                    |
| 7914550 | ZBTB8OS         | 1.358545  | up | zinc finger and BTB domain containing 8 opposite strand      |
| 8113504 | C5orf13         | 1.3578898 | up | chromosome 5 open reading frame 13                           |
| 8117225 | GMNN            | 1.357299  | up | geminin, DNA replication inhibitor                           |
| 7988286 | SPG11           | 1.3569458 | up | spastic paraplegia 11 (autosomal recessive)                  |
| 7943387 | C11orf70        | 1.3564981 | up | chromosome 11 open reading frame 70                          |
| 8002152 | SLC12A4         | 1.3562706 | up | solute carrier family 12 (potassium/chloride transporters)   |
| 8028311 | SPINT2 LOC10013 | 1.3560035 | up | serine peptidase inhibitor, Kunitz type, 2   hypothetical pr |
| 8038347 | TEAD2           | 1.3557191 | up | TEA domain family member 2                                   |
| 8112121 | SLC38A9         | 1.3554838 | up | solute carrier family 38, member 9                           |
| 7950544 | PRKRIR          | 1.3551826 | up | protein-kinase, interferon-inducible double stranded RNA     |
| 8141206 | BAIAP2L1 LOC100 | 1.3551203 | up | BAI1-associated protein 2-like 1   hypothetical protein LO   |
| 8113103 | KIAA0825        | 1.3550706 | up |                                                              |
| 8133258 | WBSCR17         | 1.3547437 | up | Williams-Beuren syndrome chromosome region 17                |
| 8128726 | PPIL6           | 1.3536165 | up | peptidylprolyl isomerase (cyclophilin)-like 6                |
| 8090988 | CEP70           | 1.353404  | up | centrosomal protein 70kDa                                    |
| 8062748 | IFT52           | 1.3523512 | up | intraflagellar transport 52 homolog ( <i>Chlamydomonas</i> ) |
| 7968711 | COG6            | 1.351923  | up | component of oligomeric golgi complex 6                      |
| 8092073 | EIF5A2          | 1.3518856 | up | eukaryotic translation initiation factor 5A2                 |
| 7901426 | ZFYVE9          | 1.3507695 | up | zinc finger, FYVE domain containing 9                        |
| 8166442 | FAM3C           | 1.3505092 | up | family with sequence similarity 3, member C                  |
| 8151066 | ARMC1           | 1.3504286 | up | armadillo repeat containing 1                                |
| 8121510 | BXDC1           | 1.3501837 | up | brix domain containing 1                                     |

## Supplemental Table 1b

eMSC vs. eEN

|         |                 |           |    |                                                                      |
|---------|-----------------|-----------|----|----------------------------------------------------------------------|
| 8104321 | ADAMTS16        | 1.3498982 | up | ADAM metallopeptidase with thrombospondin type 1 mo                  |
| 8142540 | FAM3C           | 1.3492467 | up | family with sequence similarity 3, member C                          |
| 8040927 | NRBP1           | 1.3472706 | up | nuclear receptor binding protein 1                                   |
| 7961386 | GPRC5D          | 1.3468412 | up | G protein-coupled receptor, family C, group 5, member D              |
| 7921987 | TMCO1           | 1.346595  | up | transmembrane and coiled-coil domains 1                              |
| 8017162 | RNFT1           | 1.3465012 | up | ring finger protein, transmembrane 1                                 |
| 8041745 | C2orf34         | 1.3440576 | up | chromosome 2 open reading frame 34                                   |
| 8094574 | TBC1D1          | 1.3439965 | up | TBC1 (tre-2/USP6, BUB2, cdc16) domain family, member 1               |
| 8129666 | SLC2A12         | 1.3437668 | up | solute carrier family 2 (facilitated glucose transporter), me        |
| 8124622 | ZNF311          | 1.3434743 | up | zinc finger protein 311                                              |
| 8129231 | C6orf60         | 1.3434271 | up | chromosome 6 open reading frame 60                                   |
| 8069744 | RWDD2B          | 1.343423  | up | RWD domain containing 2B                                             |
| 8104693 | PDZD2           | 1.3433133 | up | PDZ domain containing 2                                              |
| 8040163 | IAH1            | 1.3428776 | up | isoamyl acetate-hydrolyzing esterase 1 homolog ( <i>S. cerevi</i>    |
| 8125360 | PBX2            | 1.3422072 | up | pre-B-cell leukemia homeobox 2                                       |
| 8022393 | PTPN2           | 1.3420341 | up | protein tyrosine phosphatase, non-receptor type 2                    |
| 8030049 | PSCD2           | 1.3415715 | up | pleckstrin homology, Sec7 and coiled-coil domains 2 (cyto            |
| 7915286 | PPT1            | 1.340708  | up | palmitoyl-protein thioesterase 1 (ceroid-lipofuscinosis, ne          |
| 8178275 | ZNF311          | 1.3405516 | up | zinc finger protein 311                                              |
| 8104856 | SPEF2 LOC100134 | 1.3399086 | up | sperm flagellar 2   hypothetical protein LOC100134025                |
| 8121578 | NT5DC1          | 1.3397169 | up | 5'-nucleotidase domain containing 1                                  |
| 8000003 | THUMPD1         | 1.3393975 | up | THUMP domain containing 1                                            |
| 7917896 | ALG14           | 1.339363  | up | asparagine-linked glycosylation 14 homolog ( <i>S. cerevisiae</i> )  |
| 8079198 | ZNF660          | 1.338568  | up | zinc finger protein 660                                              |
| 8151824 | RAD54B LOC1001  | 1.33849   | up | RAD54 homolog B ( <i>S. cerevisiae</i> )   similar to fibrinogen sil |
| 8031640 | ZNF583          | 1.3380985 | up | zinc finger protein 583                                              |
| 8081953 | GTF2E1          | 1.3376069 | up | general transcription factor IIE, polypeptide 1, alpha 56kD          |
| 8051605 | HNRPLL          | 1.3365456 | up | heterogeneous nuclear ribonucleoprotein L-like                       |
| 7957298 | NAV3            | 1.3346976 | up | neuron navigator 3                                                   |
| 8095907 | FRAS1           | 1.334551  | up | Fraser syndrome 1                                                    |
| 7956989 | MDM2            | 1.3340945 | up | Mdm2 p53 binding protein homolog (mouse)                             |
| 7943231 | ANKRD49         | 1.333694  | up | ankyrin repeat domain 49                                             |
| 8011832 | NUP88           | 1.3333379 | up | nucleoporin 88kDa                                                    |

## Supplemental Table 1b

eMSC vs. eEN

|         |              |           |    |                                                           |
|---------|--------------|-----------|----|-----------------------------------------------------------|
| 8069301 | COL6A2       | 1.3327274 | up | collagen, type VI, alpha 2                                |
| 7924476 | TAF1A        | 1.3320304 | up | TATA box binding protein (TBP)-associated factor, RNA po  |
| 8059801 | USP40        | 1.3320031 | up | ubiquitin specific peptidase 40                           |
| 8052934 | MCEE         | 1.3308051 | up | methylmalonyl CoA epimerase                               |
| 8116848 | PAK1IP1      | 1.3306096 | up | PAK1 interacting protein 1                                |
| 7936856 | GALNAC4S-6ST | 1.3295503 | up | B cell RAG associated protein                             |
| 8092328 | MCCC1        | 1.3283795 | up | methylcrotonoyl-Coenzyme A carboxylase 1 (alpha)          |
| 8146000 | ADAM9        | 1.3281201 | up | ADAM metallopeptidase domain 9 (meltrin gamma)            |
| 8066493 | SLPI         | 1.3280106 | up | secretory leukocyte peptidase inhibitor                   |
| 7980958 | LGMN         | 1.327101  | up | legumain                                                  |
| 7974214 | KLHDC1       | 1.3265924 | up | kelch domain containing 1                                 |
| 8129706 | HBS1L        | 1.3259535 | up | HBS1-like ( <i>S. cerevisiae</i> )                        |
| 7937961 | MMP26        | 1.3256668 | up | matrix metallopeptidase 26                                |
| 7930927 | INPP5F       | 1.325479  | up | inositol polyphosphate-5-phosphatase F                    |
| 8132369 | EPDR1        | 1.3253161 | up | ependymin related protein 1 (zebrafish)                   |
| 7915444 | LEPRE1       | 1.3249311 | up | leucine proline-enriched proteoglycan (leprecan) 1        |
| 8007154 | FKBP10       | 1.3236114 | up | FK506 binding protein 10, 65 kDa                          |
| 7979824 | ACTN1        | 1.3230555 | up | actinin, alpha 1                                          |
| 8117081 | AOF1         | 1.3221014 | up | amine oxidase (flavin containing) domain 1                |
| 8008113 | CALCOCO2     | 1.3217403 | up | calcium binding and coiled-coil domain 2                  |
| 8168873 | LOC653354    | 1.3204814 | up |                                                           |
| 8138466 | 7A5          | 1.3204263 | up | putative binding protein 7a5                              |
| 7970546 | EFHA1        | 1.3200704 | up | EF-hand domain family, member A1                          |
| 7989315 | GTF2A2       | 1.3200004 | up | general transcription factor IIA, 2, 12kDa                |
| 8030950 | ZNF701       | 1.3183942 | up | zinc finger protein 701                                   |
| 8150691 | EFCAB1       | 1.318161  | up | EF-hand calcium binding domain 1                          |
| 8166104 | OFD1         | 1.3173949 | up | oral-facial-digital syndrome 1                            |
| 8117382 | HIST1H2BD    | 1.3164684 | up | histone cluster 1, H2bd                                   |
| 8047443 | ALS2CR2      | 1.3161565 | up | amyotrophic lateral sclerosis 2 (juvenile) chromosome reg |
| 8138553 | FAM126A      | 1.3155143 | up | family with sequence similarity 126, member A             |
| 8169186 | TBC1D8B      | 1.315486  | up | TBC1 domain family, member 8B (with GRAM domain)          |
| 8006345 | RHOT1        | 1.3151896 | up | ras homolog gene family, member T1                        |
| 8096938 | LARP7        | 1.3138599 | up | La ribonucleoprotein domain family, member 7              |

## Supplemental Table 1b

eMSC vs. eEN

|         |              |           |    |                                                               |
|---------|--------------|-----------|----|---------------------------------------------------------------|
| 8157021 | NIPSNAP3A    | 1.3132747 | up | nipsnap homolog 3A ( <i>C. elegans</i> )                      |
| 8066822 | SULF2        | 1.3126872 | up | sulfatase 2                                                   |
| 8144701 | LOC100131581 | 1.3122176 | up |                                                               |
| 8133459 | CLIP2        | 1.3120234 | up | CAP-GLY domain containing linker protein 2                    |
| 8141024 | BET1         | 1.3108828 | up | blocked early in transport 1 homolog ( <i>S. cerevisiae</i> ) |
| 7925672 | ZNF670       | 1.3108215 | up | zinc finger protein 670                                       |
| 8089627 | CCDC52       | 1.3104377 | up | coiled-coil domain containing 52                              |
| 8127549 | SLC17A5      | 1.3096482 | up | solute carrier family 17 (anion/sugar transporter), membe     |
| 8109938 | RANBP17      | 1.3092805 | up | RAN binding protein 17                                        |
| 8121794 | SMPDL3A      | 1.3083365 | up | sphingomyelin phosphodiesterase, acid-like 3A                 |
| 8088745 | FRMD4B       | 1.307899  | up | FERM domain containing 4B                                     |
| 8060988 | BTBD3        | 1.30723   | up | BTB (POZ) domain containing 3                                 |
| 8144802 | PDGFRL       | 1.3069458 | up | platelet-derived growth factor receptor-like                  |
| 8133770 | CCDC146      | 1.3067441 | up | coiled-coil domain containing 146                             |
| 7922598 | ANGPTL1      | 1.3062438 | up | angiopoietin-like 1                                           |
| 8052626 | VPS54        | 1.3053739 | up | vacuolar protein sorting 54 homolog ( <i>S. cerevisiae</i> )  |
| 8129974 | FUCA2        | 1.3034136 | up | fucosidase, alpha-L- 2, plasma                                |
| 8041257 | SLC30A6      | 1.3024833 | up | solute carrier family 30 (zinc transporter), member 6         |
| 7931479 | INPP5A       | 1.3012444 | up | inositol polyphosphate-5-phosphatase, 40kDa                   |
| 8155883 | OSTF1        | 1.3008667 | up | osteoclast stimulating factor 1                               |
| 8127158 | GCLC         | 1.3008093 | up | glutamate-cysteine ligase, catalytic subunit                  |
| 8114193 | SAR1B        | 1.3005302 | up | SAR1 gene homolog B ( <i>S. cerevisiae</i> )                  |
| 7965048 | NAP1L1       | 1.3001534 | up | nucleosome assembly protein 1-like 1                          |
| 8082244 | OR7E37P      | 1.2999299 | up | olfactory receptor, family 7, subfamily E, member 37 pseu     |
| 8120943 | CYB5R4       | 1.2992886 | up | cytochrome b5 reductase 4                                     |
| 8102464 | TRAM1L1      | 1.2989926 | up | translocation associated membrane protein 1-like 1            |
| 7903144 | SLC44A3      | 1.298911  | up | solute carrier family 44, member 3                            |
| 7946288 | ZNF214       | 1.2977383 | up | zinc finger protein 214                                       |
| 7973756 | KIAA1333     | 1.2972006 | up |                                                               |
| 8081343 | RG9MTD1      | 1.297179  | up | RNA (guanine-9-) methyltransferase domain containing 1        |
| 8124502 | ZNF184       | 1.296991  | up | zinc finger protein 184                                       |
| 8171708 | CXorf23      | 1.2965248 | up | chromosome X open reading frame 23                            |
| 8122672 | MAP3K7IP2    | 1.2963821 | up | mitogen-activated protein kinase kinase kinase 7 interacti    |

## Supplemental Table 1b

eMSC vs. eEN

|         |                 |           |    |                                                               |
|---------|-----------------|-----------|----|---------------------------------------------------------------|
| 8175052 | AIFM1           | 1.2960193 | up | apoptosis-inducing factor, mitochondrion-associated, 1        |
| 7947138 | FANCF           | 1.2944925 | up | Fanconi anemia, complementation group F                       |
| 8138145 | LOC441453       | 1.2939185 | up | similar to olfactory receptor, family 7, subfamily A, memb    |
| 8005638 | ALDH3A2         | 1.2931604 | up | aldehyde dehydrogenase 3 family, member A2                    |
| 8078262 | UBE2E1          | 1.2929091 | up | ubiquitin-conjugating enzyme E2E 1 (UBC4/5 homolog, ye        |
| 8032730 | EEF2            | 1.2919323 | up | eukaryotic translation elongation factor 2                    |
| 8029950 | EHD2            | 1.2915933 | up | EH-domain containing 2                                        |
| 7975136 | FUT8            | 1.290089  | up | fucosyltransferase 8 (alpha (1,6) fucosyltransferase)         |
| 8000375 | ARHGAP17        | 1.29004   | up | Rho GTPase activating protein 17                              |
| 8129677 | SGK1            | 1.2893567 | up | serum/glucocorticoid regulated kinase 1                       |
| 8098084 | ETFDH           | 1.2892834 | up | electron-transferring-flavoprotein dehydrogenase              |
| 8005603 | SLC47A1         | 1.2885565 | up | solute carrier family 47, member 1                            |
| 8149774 | LOXL2 ENTPD4    | 1.2882721 | up | lysyl oxidase-like 2   ectonucleoside triphosphate diphosp    |
| 7950796 | CREBZF          | 1.2880563 | up | CREB/ATF bZIP transcription factor                            |
| 7907171 | BLZF1           | 1.2875667 | up | basic leucine zipper nuclear factor 1 (JEM-1)                 |
| 7983828 | TEX9            | 1.2873306 | up | testis expressed 9                                            |
| 8000013 | EXOD1 DCUN1D3   | 1.2871401 | up | exonuclease domain containing 1   DCN1, defective in cul      |
| 8143610 | FLJ43692 LOC728 | 1.2866902 | up | ARHGEF5-like   similar to rho guanine nucleotide exchang      |
| 8162147 | ZCCHC6          | 1.2862498 | up | zinc finger, CCHC domain containing 6                         |
| 8116867 | TMEM14B         | 1.2853689 | up | transmembrane protein 14B                                     |
| 8168466 | LOC100129513 LC | 1.2848058 | up | similar to PRO0756   magnesium transporter 1                  |
| 8107234 | MAN2A1          | 1.2844722 | up | mannosidase, alpha, class 2A, member 1                        |
| 8038981 | ZNF611          | 1.2844492 | up | zinc finger protein 611                                       |
| 8107133 | PAM             | 1.2840452 | up | peptidylglycine alpha-amidating monooxygenase                 |
| 8169617 | PGRMC1          | 1.2833709 | up | progesterone receptor membrane component 1                    |
| 7960850 | SLC2A14 SLC2A3  | 1.2832956 | up | solute carrier family 2 (facilitated glucose transporter), me |
| 8028656 | PLEKHG2         | 1.2826436 | up | pleckstrin homology domain containing, family G (with Rh      |
| 7922523 | LOC730167       | 1.2819049 | up | similar to protein tyrosine phosphatase 4a1                   |
| 8138912 | LSM5            | 1.281833  | up |                                                               |
| 7903592 | KIAA1324        | 1.2807437 | up |                                                               |
| 8123044 | TULP4           | 1.2803425 | up | tubby like protein 4                                          |
| 8117377 | HIST1H1E        | 1.2801802 | up | histone cluster 1, H1e                                        |
| 7908041 | LAMC1           | 1.2801348 | up | laminin, gamma 1 (formerly LAMB2)                             |



## Supplemental Table 1b

eMSC vs. eEN

|         |              |           |    |                                                                 |
|---------|--------------|-----------|----|-----------------------------------------------------------------|
| 7902861 | LRRC8B       | 1.2800915 | up | leucine rich repeat containing 8 family, member B               |
| 8043197 | VAMP8        | 1.2797949 | up | vesicle-associated membrane protein 8 (endobrevin)              |
| 7975971 | C14orf174    | 1.2797562 | up | chromosome 14 open reading frame 174                            |
| 7983478 | C15orf48     | 1.2783633 | up | chromosome 15 open reading frame 48                             |
| 7929052 | IFIT3        | 1.2782679 | up | interferon-induced protein with tetratricopeptide repeats       |
| 8027247 | ZNF93        | 1.2782589 | up | zinc finger protein 93                                          |
| 8142663 | NDUFA5       | 1.2779627 | up | NADH dehydrogenase (ubiquinone) 1 alpha subcomplex, 5           |
| 8020930 | ELP2         | 1.2778773 | up | elongation protein 2 homolog ( <i>S. cerevisiae</i> )           |
| 8090133 | CCDC14       | 1.2777513 | up | coiled-coil domain containing 14                                |
| 8048081 | SPAG16       | 1.2771181 | up | sperm associated antigen 16                                     |
| 7956488 | KIF5A        | 1.2767279 | up | kinesin family member 5A                                        |
| 8109773 | WWC1         | 1.2764745 | up | WW and C2 domain containing 1                                   |
| 8002481 | HYDIN HYDIN2 | 1.2763075 | up | hydrocephalus inducing homolog (mouse)   hydrocephalus          |
| 7998952 | TIGD7        | 1.2760222 | up | tigger transposable element derived 7                           |
| 7936408 | DCLRE1A      | 1.2759993 | up | DNA cross-link repair 1A (PSO2 homolog, <i>S. cerevisiae</i> )  |
| 7929562 | ZNF518A      | 1.2759643 | up | zinc finger protein 518A                                        |
| 8151942 | HRSP12       | 1.2752726 | up | heat-responsive protein 12                                      |
| 8133360 | CLDN4        | 1.2752415 | up | claudin 4                                                       |
| 8092009 | LRRC34       | 1.2745901 | up | leucine rich repeat containing 34                               |
| 7958202 | CHST11       | 1.2740906 | up | carbohydrate (chondroitin 4) sulfotransferase 11                |
| 7951672 | PIH1D2       | 1.2739512 | up | PIH1 domain containing 2                                        |
| 8140650 | SEMA3E       | 1.2732382 | up | sema domain, immunoglobulin domain (Ig), short basic domain     |
| 8156319 | GADD45G      | 1.2731973 | up | growth arrest and DNA-damage-inducible, gamma                   |
| 8135235 | PMPCB        | 1.2727585 | up | peptidase (mitochondrial processing) beta                       |
| 7939158 | QSER1        | 1.2726085 | up | glutamine and serine rich 1                                     |
| 7949931 | SUV420H1     | 1.2721734 | up | suppressor of variegation 4-20 homolog 1 ( <i>Drosophila</i> )  |
| 7959893 | GPR133       | 1.2706277 | up | G protein-coupled receptor 133                                  |
| 7917482 | CCBL2        | 1.270323  | up | cysteine conjugate-beta lyase 2                                 |
| 7979158 | TXNDC16      | 1.2701805 | up | thioredoxin domain containing 16                                |
| 8085954 | AZI2         | 1.2700504 | up | 5-azacytidine induced 2                                         |
| 8130499 | DYNLT1       | 1.2698394 | up | dynein, light chain, Tctex-type 1                               |
| 7902345 | TYW3         | 1.2695982 | up | tRNA-yW synthesizing protein 3 homolog ( <i>S. cerevisiae</i> ) |
| 7954382 | PYROXD1      | 1.2690462 | up | pyridine nucleotide-disulphide oxidoreductase domain 1          |

## Supplemental Table 1b

eMSC vs. eEN

|         |                 |           |    |                                                             |
|---------|-----------------|-----------|----|-------------------------------------------------------------|
| 8050007 | PXDN            | 1.2679783 | up | peroxidasin homolog (Drosophila)                            |
| 8106702 | ZCCHC9          | 1.2679771 | up | zinc finger, CCHC domain containing 9                       |
| 8052250 | MTIF2           | 1.267657  | up | mitochondrial translational initiation factor 2             |
| 7921821 | ADAMTS4         | 1.2665036 | up | ADAM metalloproteinase with thrombospondin type 1 mo        |
| 7953385 | GAPDH           | 1.2661557 | up | glyceraldehyde-3-phosphate dehydrogenase                    |
| 8175696 | GABRA3          | 1.265064  | up | gamma-aminobutyric acid (GABA) A receptor, alpha 3          |
| 8117372 | HIST1H2AC       | 1.2645053 | up | histone cluster 1, H2ac                                     |
| 8023191 | SMAD2           | 1.2644259 | up | SMAD family member 2                                        |
| 8054517 | FLJ38359 LOC440 | 1.2640973 | up | hypothetical protein FLJ38359   hypothetical protein LOC    |
| 8061138 | CSRP2BP         | 1.2635137 | up | CSRP2 binding protein                                       |
| 8169352 | NXT2            | 1.2631282 | up | nuclear transport factor 2-like export factor 2             |
| 8105970 | GTF2H2 DKFZP68  | 1.262789  | up | general transcription factor IIF, polypeptide 2, 44kDa   ge |
| 8128013 | RARS2           | 1.262753  | up | arginyl-tRNA synthetase 2, mitochondrial                    |
| 8113050 | CETN3           | 1.2625424 | up | centrin, EF-hand protein, 3 (CDC31 homolog, yeast)          |
| 7901460 | GPX7            | 1.2615486 | up | glutathione peroxidase 7                                    |
| 7980720 | TTC7B           | 1.2613114 | up | tetratricopeptide repeat domain 7B                          |
| 7934411 | USP54           | 1.261246  | up | ubiquitin specific peptidase 54                             |
| 7967933 | IFT88           | 1.2606587 | up | intraflagellar transport 88 homolog (Chlamydomonas)         |
| 7960383 | PARP11          | 1.2604735 | up | poly (ADP-ribose) polymerase family, member 11              |
| 7924058 | IRF6            | 1.2597055 | up | interferon regulatory factor 6                              |
| 8119000 | MAPK14          | 1.2596898 | up | mitogen-activated protein kinase 14                         |
| 8103289 | PLRG1           | 1.2596686 | up | pleiotropic regulator 1 (PRL1 homolog, Arabidopsis)         |
| 7969640 | CLDN10          | 1.2591984 | up | claudin 10                                                  |
| 7974725 | C14orf100       | 1.2579762 | up | chromosome 14 open reading frame 100                        |
| 7904830 | ZNF364          | 1.256239  | up | zinc finger protein 364                                     |
| 8108733 | PCDHB12         | 1.2555932 | up | protocadherin beta 12                                       |
| 8129880 | PERP            | 1.2555492 | up |                                                             |
| 8058627 | ERBB4           | 1.2550743 | up | v-erb-a erythroblastic leukemia viral oncogene homolog 4    |
| 8009476 | MAP2K6          | 1.2545712 | up | mitogen-activated protein kinase kinase 6                   |
| 8145470 | DPYSL2          | 1.2542615 | up | dihydropyrimidinase-like 2                                  |
| 8065607 | PLAGL2          | 1.2535521 | up | pleiomorphic adenoma gene-like 2                            |
| 8048835 | C2orf33         | 1.253459  | up | chromosome 2 open reading frame 33                          |
| 8092552 | IGF2BP2         | 1.2531804 | up | insulin-like growth factor 2 mRNA binding protein 2         |

## Supplemental Table 1b

eMSC vs. eEN

|         |                 |           |    |                                                             |
|---------|-----------------|-----------|----|-------------------------------------------------------------|
| 8019183 | ACTG1           | 1.2526746 | up | actin, gamma 1                                              |
| 7934690 | C10orf56        | 1.2515235 | up | chromosome 10 open reading frame 56                         |
| 8152597 | MRPL13          | 1.251518  | up | mitochondrial ribosomal protein L13                         |
| 8027268 | ZNF66           | 1.2510577 | up | zinc finger protein 66                                      |
| 8125415 | C6orf10         | 1.2509766 | up | chromosome 6 open reading frame 10                          |
| 8035465 | ISYNA1          | 1.2505075 | up | myo-inositol 1-phosphate synthase A1                        |
| 8094226 | LOC285550       | 1.2502469 | up |                                                             |
| 8035779 | LOC100128975    | 1.2489778 | up | similar to Zinc finger protein 626                          |
| 8087985 | GLT8D1          | 1.2487146 | up | glycosyltransferase 8 domain containing 1                   |
| 7950683 | NARS2           | 1.2485344 | up | asparaginyl-tRNA synthetase 2, mitochondrial (putative)     |
| 8054519 | LIMS3 LOC729260 | 1.2484022 | up | LIM and senescent cell antigen-like domains 3   similar to  |
| 8110971 | CMBL            | 1.2479951 | up | carboxymethylenebutenolidase homolog (Pseudomonas)          |
| 7932885 | ARHGAP12        | 1.2478476 | up | Rho GTPase activating protein 12                            |
| 8108708 | PCDHB7          | 1.2470703 | up | protocadherin beta 7                                        |
| 8131719 | DNAH11          | 1.2468809 | up | dynein, axonemal, heavy chain 11                            |
| 8044333 | LIMS3 LOC729260 | 1.2462865 | up | LIM and senescent cell antigen-like domains 3   similar to  |
| 7979524 | TMEM30B         | 1.2460591 | up | transmembrane protein 30B                                   |
| 7900159 | DNALI1          | 1.245697  | up | dynein, axonemal, light intermediate chain 1                |
| 7982256 | GOLGA9P         | 1.2449512 | up | golgi autoantigen, golgin subfamily a, 9 pseudogene         |
| 8143633 | OR2A7 OR2A4 LC  | 1.244808  | up | olfactory receptor, family 2, subfamily A, member 7   olfa  |
| 8122396 | AIG1            | 1.2439578 | up | androgen-induced 1                                          |
| 8175432 | SNORD61         | 1.242679  | up | small nucleolar RNA, C/D box 61                             |
| 8122202 | MYB             | 1.242606  | up | v-myb myeloblastosis viral oncogene homolog (avian)         |
| 7922408 | SNORD78         | 1.2417473 | up | small nucleolar RNA, C/D box 78                             |
| 8173647 | ZDHHC15         | 1.2414727 | up | zinc finger, DHHC-type containing 15                        |
| 8004133 | RPAIN           | 1.2414268 | up | RPA interacting protein                                     |
| 8115600 | LOC63920        | 1.2412683 | up | transposon-derived Buster3 transposase-like                 |
| 7914996 | C1orf149        | 1.2408589 | up | chromosome 1 open reading frame 149                         |
| 8113709 | LOX             | 1.2404315 | up | lysyl oxidase                                               |
| 8048733 | ACSL3           | 1.2399566 | up | acyl-CoA synthetase long-chain family member 3              |
| 7983638 | DTWD1           | 1.2398828 | up | DTW domain containing 1                                     |
| 7936028 | ACTR1A          | 1.239263  | up | ARP1 actin-related protein 1 homolog A, cencentractin alpha |
| 8106602 | ZFYVE16         | 1.238506  | up | zinc finger, FYVE domain containing 16                      |

## Supplemental Table 1b

eMSC vs. eEN

|         |                 |           |    |                                                              |
|---------|-----------------|-----------|----|--------------------------------------------------------------|
| 7996837 | CDH1            | 1.2379802 | up | cadherin 1, type 1, E-cadherin (epithelial)                  |
| 8075462 | SELM            | 1.2377589 | up | selenoprotein M                                              |
| 8169240 | PRPS1           | 1.2372662 | up | phosphoribosyl pyrophosphate synthetase 1                    |
| 7944656 | SC5DL           | 1.2372401 | up | sterol-C5-desaturase (ERG3 delta-5-desaturase homolog, :)    |
| 8121043 | ORC3L           | 1.2370117 | up | origin recognition complex, subunit 3-like (yeast)           |
| 8051707 | MAP4K3          | 1.2369258 | up | mitogen-activated protein kinase kinase kinase 3             |
| 8112538 | GTF2H2 DKFZP681 | 1.2359937 | up | general transcription factor IIH, polypeptide 2, 44kDa   ge  |
| 7973840 | ARHGAP5         | 1.2355093 | up | Rho GTPase activating protein 5                              |
| 8131479 | FLJ20323        | 1.2354739 | up |                                                              |
| 7991581 | CHSY1           | 1.234885  | up | chondroitin sulfate synthase 1                               |
| 8088548 | LOC401070       | 1.2343246 | up | FLJ43791 protein                                             |
| 8059680 | HTR2B           | 1.234003  | up | 5-hydroxytryptamine (serotonin) receptor 2B                  |
| 8063458 | DOK5            | 1.2338628 | up | docking protein 5                                            |
| 7927786 | REEP3           | 1.2337396 | up | receptor accessory protein 3                                 |
| 8172225 | EFHC2           | 1.2334148 | up | EF-hand domain (C-terminal) containing 2                     |
| 8113914 | FNIP1 RAPGEF6   | 1.2331762 | up | folliculin interacting protein 1   Rap guanine nucleotide ex |
| 8177507 | GTF2H2 DKFZP681 | 1.2320875 | up | general transcription factor IIH, polypeptide 2, 44kDa   ge  |
| 7928558 | ZMIZ1           | 1.2318642 | up | zinc finger, MIZ-type containing 1                           |
| 7897953 | SNORA59A SNOR,  | 1.2311267 | up | small nucleolar RNA, H/ACA box 59A   small nucleolar RN,     |
| 8161892 | GNA14           | 1.2305728 | up | guanine nucleotide binding protein (G protein), alpha 14     |
| 8168968 | GPRASP1         | 1.2302892 | up | G protein-coupled receptor associated sorting protein 1      |
| 7988414 | GATM            | 1.2301373 | up | glycine amidinotransferase (L-arginine:glycine amidinotra    |
| 8114536 | TMEM173         | 1.2300893 | up | transmembrane protein 173                                    |
| 8005626 | SNORA59A SNOR,  | 1.2300805 | up | small nucleolar RNA, H/ACA box 59A   small nucleolar RN,     |
| 8042574 | OR7E37P LOC441. | 1.229904  | up | olfactory receptor, family 7, subfamily E, member 37 pseu    |
| 8034315 | ZNF823          | 1.2291913 | up | zinc finger protein 823                                      |
| 8148501 | PTP4A3 LOC1001: | 1.228911  | up | protein tyrosine phosphatase type IVA, member 3   simila     |
| 8129558 | OR2A4 OR2A7     | 1.2286265 | up | olfactory receptor, family 2, subfamily A, member 4   olfa   |
| 8020973 | FHOD3           | 1.2278179 | up | formin homology 2 domain containing 3                        |
| 7974799 | MNAT1           | 1.2266454 | up | menage a trois homolog 1, cyclin H assembly factor (Xeno     |
| 8121429 | FIG4            | 1.2257997 | up |                                                              |
| 8069620 | MRPL39          | 1.2248781 | up | mitochondrial ribosomal protein L39                          |
| 8111129 | ZNF622          | 1.2238488 | up | zinc finger protein 622                                      |

## Supplemental Table 1b

eMSC vs. eEN

|         |                 |           |    |                                                             |
|---------|-----------------|-----------|----|-------------------------------------------------------------|
| 7969533 | SLAIN1          | 1.2227827 | up | SLAIN motif family, member 1                                |
| 8105918 | GTF2H2 DKFZP681 | 1.2227789 | up | general transcription factor IIH, polypeptide 2, 44kDa   ge |
| 8091120 | GK5             | 1.222706  | up | glycerol kinase 5 (putative)                                |
| 7997396 | ATMIN           | 1.2226615 | up | ATM interactor                                              |
| 7904314 | TTF2            | 1.2214165 | up | transcription termination factor, RNA polymerase II         |
| 7994237 | LCMT1           | 1.2206609 | up | leucine carboxyl methyltransferase 1                        |
| 8113717 | MGC32805        | 1.2199558 | up |                                                             |
| 8122222 | PDE7B           | 1.2193866 | up | phosphodiesterase 7B                                        |
| 8136987 | ARHGEF5 LOC728  | 1.2193546 | up | Rho guanine nucleotide exchange factor (GEF) 5   similar t  |
| 8177674 | GTF2H2 DKFZP681 | 1.2190729 | up | general transcription factor IIH, polypeptide 2, 44kDa   ge |
| 8082066 | C3orf28         | 1.2190627 | up | chromosome 3 open reading frame 28                          |
| 8047577 | ALS2CR8         | 1.2188945 | up | amyotrophic lateral sclerosis 2 (juvenile) chromosome reg   |
| 8046759 | DNAJC10         | 1.2188755 | up | DnaJ (Hsp40) homolog, subfamily C, member 10                |
| 8161648 | KLF9            | 1.2184311 | up | Kruppel-like factor 9                                       |
| 8112622 | GFM2            | 1.2184079 | up | G elongation factor, mitochondrial 2                        |
| 7942941 | CCDC81          | 1.2179935 | up | coiled-coil domain containing 81                            |
| 8058462 | MDH1B           | 1.2169449 | up | malate dehydrogenase 1B, NAD (soluble)                      |
| 8092134 | PLD1            | 1.2165602 | up | phospholipase D1, phosphatidylcholine-specific              |
| 7932000 | KIN             | 1.2163188 | up |                                                             |
| 8099593 | KCNIP4          | 1.2147555 | up | Kv channel interacting protein 4                            |
| 8161575 | CBWD5 CBWD3 C   | 1.2135276 | up | COBW domain containing 5   COBW domain containing 3         |
| 8094169 | CPEB2           | 1.2122884 | up | cytoplasmic polyadenylation element binding protein 2       |
| 8068612 | WRB             | 1.2122834 | up | tryptophan rich basic protein                               |
| 7897378 | PER3            | 1.2121097 | up | period homolog 3 (Drosophila)                               |
| 8150797 | ATP6V1H         | 1.2114593 | up | ATPase, H+ transporting, lysosomal 50/57kDa, V1 subunit     |
| 8121895 | TRMT11          | 1.2110991 | up | tRNA methyltransferase 11 homolog (S. cerevisiae)           |
| 8076612 | EFCAB6          | 1.2109544 | up | EF-hand calcium binding domain 6                            |
| 8051637 | DHX57           | 1.2100201 | up | DEAH (Asp-Glu-Ala-Asp/His) box polypeptide 57               |
| 7918725 | TRIM33          | 1.2099372 | up | tripartite motif-containing 33                              |
| 8147848 | OXR1            | 1.2088538 | up | oxidation resistance 1                                      |
| 7907104 | IQWD1           | 1.2077471 | up | IQ motif and WD repeats 1                                   |
| 8078962 | EIF1B           | 1.2071073 | up | eukaryotic translation initiation factor 1B                 |
| 8144712 | C8orf79         | 1.2067512 | up | chromosome 8 open reading frame 79                          |

Supplemental Table 1b  
eMSC vs. eEN

|         |               |           |    |                                                                                                              |
|---------|---------------|-----------|----|--------------------------------------------------------------------------------------------------------------|
| 8139228 | C7orf25       | 1.2063482 | up | chromosome 7 open reading frame 25                                                                           |
| 7943263 | AMOTL1        | 1.2056673 | up | angiomin like 1                                                                                              |
| 8157193 | ZNF483        | 1.2048646 | up | zinc finger protein 483                                                                                      |
| 8104746 | NPR3          | 1.2044513 | up | natriuretic peptide receptor C/guanylate cyclase C (atrioventricular node, T-cell differentiation protein 2) |
| 8148040 | MAL2          | 1.2039803 | up | mal, T-cell differentiation protein 2                                                                        |
| 8147891 | PKHD1L1       | 1.2032725 | up | polycystic kidney and hepatic disease 1 (autosomal recessive)                                                |
| 8144378 | AGPAT5        | 1.2026782 | up | 1-acylglycerol-3-phosphate O-acyltransferase 5 (lysophospholipase)                                           |
| 8004955 | LOC284033     | 1.201859  | up |                                                                                                              |
| 8095545 | RUFY3         | 1.2014122 | up | RUN and FYVE domain containing 3                                                                             |
| 8028194 | ZNF382        | 1.201273  | up | zinc finger protein 382                                                                                      |
| 8122933 | TIAM2         | 1.2011946 | up | T-cell lymphoma invasion and metastasis 2                                                                    |
| 8107594 | SNCAIP        | 1.2010515 | up | synuclein, alpha interacting protein (synphilin)                                                             |
| 7938834 | NAV2          | 1.200461  | up | neuron navigator 2                                                                                           |
| 8121734 | ASF1A         | 1.2003055 | up | ASF1 anti-silencing function 1 homolog A ( <i>S. cerevisiae</i> )                                            |
| 8089203 | SENP7         | 1.2002517 | up | SUMO1/sentrin specific peptidase 7                                                                           |
| 8150002 | FBXO16 ZNF395 | 1.1998223 | up | F-box protein 16   zinc finger protein 395                                                                   |
| 8143988 | MLL3          | 1.1983167 | up | myeloid/lymphoid or mixed-lineage leukemia 3                                                                 |
| 8127872 | SNAP91        | 1.1976842 | up | synaptosomal-associated protein, 91kDa homolog (mouse)                                                       |
| 8127051 | TRAM2         | 1.1975645 | up | translocation associated membrane protein 2                                                                  |
| 7962427 | PUS7L         | 1.1974084 | up | pseudouridylate synthase 7 homolog ( <i>S. cerevisiae</i> )-like                                             |
| 7917954 | FRRS1         | 1.1971829 | up | ferric-chelate reductase 1                                                                                   |
| 7922130 | DPT           | 1.197072  | up | dermatopontin                                                                                                |
| 7975772 | C14orf140     | 1.1969309 | up | chromosome 14 open reading frame 140                                                                         |
| 7962151 | MGC24039      | 1.1966858 | up |                                                                                                              |
| 7937079 | BNIP3         | 1.1951146 | up | BCL2/adenovirus E1B 19kDa interacting protein 3                                                              |
| 8094936 | LOC280665     | 1.1949521 | up | putative anti-CNG alpha 1 cation channel translation product                                                 |
| 8018761 | ST6GALNAC2    | 1.1942503 | up | ST6 (alpha-N-acetyl-neuraminyl-2,3-beta-galactosyl-1,3)-N-acetylglucosaminyl transferase 2                   |
| 8046833 | FLJ44048      | 1.1933068 | up |                                                                                                              |
| 8122242 | PEX7          | 1.1928025 | up | peroxisomal biogenesis factor 7                                                                              |
| 8153449 | EEF1D         | 1.1922989 | up | eukaryotic translation elongation factor 1 delta (guanine nucleotide exchange factor)                        |
| 8096091 | THAP9         | 1.1918571 | up | THAP domain containing 9                                                                                     |
| 7991453 | LOC400451     | 1.1912296 | up | hypothetical gene supported by AK075564; BC060873                                                            |
| 7996198 | CCDC113       | 1.1909566 | up | coiled-coil domain containing 113                                                                            |

## Supplemental Table 1b

eMSC vs. eEN

|         |                |           |    |                                                            |
|---------|----------------|-----------|----|------------------------------------------------------------|
| 8112596 | ANKRA2         | 1.190736  | up | ankyrin repeat, family A (RFXANK-like), 2                  |
| 8017150 | TUBD1          | 1.190638  | up | tubulin, delta 1                                           |
| 7918034 | DPH5           | 1.1905684 | up |                                                            |
| 8161945 | RASEF          | 1.1901327 | up | RAS and EF-hand domain containing                          |
| 8142143 | COG5           | 1.1889359 | up | component of oligomeric golgi complex 5                    |
| 7980580 | GALC           | 1.1889162 | up | galactosylceramidase                                       |
| 7927915 | STOX1          | 1.1888788 | up | storkhead box 1                                            |
| 8104378 | POLS           | 1.1885954 | up | polymerase (DNA directed) sigma                            |
| 8089851 | HGD LOC1001325 | 1.1883082 | up | homogentisate 1,2-dioxygenase (homogentisate oxidase)      |
| 7926596 | COMMD3         | 1.1873453 | up | COMM domain containing 3                                   |
| 8065566 | DEFB124        | 1.1871728 | up | defensin, beta 124                                         |
| 8082607 | ATP2C1         | 1.18568   | up | ATPase, Ca <sup>++</sup> transporting, type 2C, member 1   |
| 7923578 | FMOD           | 1.185464  | up | fibromodulin                                               |
| 7985089 | RCN2           | 1.1853005 | up | reticulocalbin 2, EF-hand calcium binding domain           |
| 8068383 | CLIC6          | 1.1836888 | up | chloride intracellular channel 6                           |
| 8157027 | NIPSNAP3B      | 1.183347  | up | nipsnap homolog 3B (C. elegans)                            |
| 8159984 | C9orf46        | 1.1832833 | up | chromosome 9 open reading frame 46                         |
| 8093278 | HGD LOC1001325 | 1.1824374 | up | homogentisate 1,2-dioxygenase (homogentisate oxidase)      |
| 7938683 | LOC441453      | 1.18222   | up | similar to olfactory receptor, family 7, subfamily A, memb |
| 8040552 | NCOA1          | 1.1817313 | up | nuclear receptor coactivator 1                             |
| 7988426 | SLC30A4        | 1.1806382 | up | solute carrier family 30 (zinc transporter), member 4      |
| 8130102 | KATNA1         | 1.180367  | up | katanin p60 (ATPase-containing) subunit A 1                |
| 8017704 | FLJ32065       | 1.1802582 | up |                                                            |
| 8105121 | GHR            | 1.1800748 | up | growth hormone receptor                                    |
| 7940630 | SCGB1D2        | 1.1797794 | up | secretoglobin, family 1D, member 2                         |
| 7999598 | NTAN1          | 1.1793977 | up | N-terminal asparagine amidase                              |
| 8142554 | AASS           | 1.1786193 | up | aminoadipate-semialdehyde synthase                         |
| 8129901 | REPS1          | 1.1784756 | up | RALBP1 associated Eps domain containing 1                  |
| 8102982 | GAB1           | 1.1783413 | up | GRB2-associated binding protein 1                          |
| 7943162 | C11orf54       | 1.1783073 | up | chromosome 11 open reading frame 54                        |
| 8143279 | ZC3HAV1        | 1.1780229 | up | zinc finger CCCH-type, antiviral 1                         |
| 7898057 | PDPN           | 1.1776505 | up | podoplanin                                                 |
| 8056829 | CIR            | 1.177197  | up | CBF1 interacting corepressor                               |

## Supplemental Table 1b

eMSC vs. eEN

|         |              |           |    |                                                             |
|---------|--------------|-----------|----|-------------------------------------------------------------|
| 8096511 | BMPR1B       | 1.1767701 | up | bone morphogenetic protein receptor, type IB                |
| 7948113 | OR7E5P       | 1.1765193 | up | olfactory receptor, family 7, subfamily E, member 5 pseud   |
| 8052233 | C2orf63      | 1.1762946 | up | chromosome 2 open reading frame 63                          |
| 8124196 | DCDC2        | 1.1758869 | up | doublecortin domain containing 2                            |
| 8163896 | STOM         | 1.1746383 | up | stomatin                                                    |
| 7940323 | MS4A8B       | 1.1746231 | up | membrane-spanning 4-domains, subfamily A, member 8B         |
| 8162652 | CTSL2        | 1.174022  | up | cathepsin L2                                                |
| 8018038 | ABCA5        | 1.173019  | up | ATP-binding cassette, sub-family A (ABC1), member 5         |
| 8163444 | ZFP37        | 1.1729252 | up | zinc finger protein 37 homolog (mouse)                      |
| 8107798 | SLC27A6      | 1.1728077 | up | solute carrier family 27 (fatty acid transporter), member 6 |
| 8157105 | ZNF462       | 1.1724424 | up | zinc finger protein 462                                     |
| 7932420 | PTPLA        | 1.1722103 | up | protein tyrosine phosphatase-like (proline instead of catal |
| 7921088 | NES          | 1.1717467 | up | nestin                                                      |
| 8002470 | HYDIN HYDIN2 | 1.1717044 | up | hydrocephalus inducing homolog (mouse)   hydrocephalu       |
| 8089954 | IQCB1        | 1.1702994 | up | IQ motif containing B1                                      |
| 8145766 | MST131       | 1.1702685 | up | MSTP131                                                     |
| 8138613 | OSBPL3       | 1.1698813 | up | oxysterol binding protein-like 3                            |
| 8121768 | PKIB         | 1.1694052 | up | protein kinase (cAMP-dependent, catalytic) inhibitor beta   |
| 7913357 | ECE1         | 1.1693138 | up | endothelin converting enzyme 1                              |
| 8098006 | GLRB         | 1.16891   | up | glycine receptor, beta                                      |
| 8057933 | GTF3C3       | 1.1675297 | up | general transcription factor IIIC, polypeptide 3, 102kDa    |
| 7903162 | TMEM56       | 1.1665443 | up | transmembrane protein 56                                    |
| 8178435 | IER3         | 1.1664504 | up | immediate early response 3                                  |
| 8095680 | IL8          | 1.166077  | up | interleukin 8                                               |
| 8170364 | AFF2         | 1.1659985 | up | AF4/FMR2 family, member 2                                   |
| 8046628 | RBM45        | 1.1657269 | up | RNA binding motif protein 45                                |
| 8077472 | GRM7         | 1.1653037 | up | glutamate receptor, metabotropic 7                          |
| 8112822 | DMGDH        | 1.165299  | up | dimethylglycine dehydrogenase                               |
| 8132376 | STARD3NL     | 1.1652653 | up | STARD3 N-terminal like                                      |
| 8060997 | SPTLC3       | 1.1651267 | up | serine palmitoyltransferase, long chain base subunit 3      |
| 8121257 | PRDM1        | 1.1651187 | up | PR domain containing 1, with ZNF domain                     |
| 7969544 | NDFIP2       | 1.1647054 | up | Nedd4 family interacting protein 2                          |
| 8052125 | ASB3         | 1.1646881 | up | ankyrin repeat and SOCS box-containing 3                    |



## Supplemental Table 1b

eMSC vs. eEN

|         |                 |           |    |                                                                                                         |
|---------|-----------------|-----------|----|---------------------------------------------------------------------------------------------------------|
| 7952601 | ETS1            | 1.164642  | up | v-ets erythroblastosis virus E26 oncogene homolog 1 (avian)                                             |
| 8104901 | IL7R            | 1.1639357 | up | interleukin 7 receptor                                                                                  |
| 8145835 | ERLIN2          | 1.1627914 | up | ER lipid raft associated 2                                                                              |
| 8122045 | AKAP7           | 1.1627731 | up | A kinase (PRKA) anchor protein 7                                                                        |
| 8007176 | TTC25           | 1.1627678 | up | tetratricopeptide repeat domain 25                                                                      |
| 8161755 | ALDH1A1         | 1.1622264 | up | aldehyde dehydrogenase 1 family, member A1                                                              |
| 8151436 | PXMP3           | 1.1617473 | up | peroxisomal membrane protein 3, 35kDa (Zellweger syndrome)                                              |
| 7987361 | ZNF770          | 1.1611929 | up | zinc finger protein 770                                                                                 |
| 8166455 | PRDX4           | 1.1611854 | up | peroxiredoxin 4                                                                                         |
| 8100478 | AASDH           | 1.1607978 | up | aminoadipate-semialdehyde dehydrogenase                                                                 |
| 8093191 | DLG1            | 1.1602947 | up | discs, large homolog 1 (Drosophila)                                                                     |
| 7951977 | FXYP6           | 1.1601815 | up | FXYP domain containing ion transport regulator 6                                                        |
| 7936734 | FGFR2           | 1.1597931 | up | fibroblast growth factor receptor 2 (bacteria-expressed kinase)                                         |
| 7923967 | YOD1            | 1.1597773 | up |                                                                                                         |
| 8129560 | CTAGE6 CTAGE4   | 1.1597174 | up | CTAGE family, member 6   CTAGE family, member 4   CTAGE family, member 6                                |
| 7957140 | LGR5            | 1.1595348 | up | leucine-rich repeat-containing G protein-coupled receptor                                               |
| 7983811 | PIGB            | 1.1593574 | up | phosphatidylinositol glycan anchor biosynthesis, class B                                                |
| 8056151 | PLA2R1          | 1.159201  | up | phospholipase A2 receptor 1, 180kDa                                                                     |
| 8097841 | TRIM2           | 1.1583229 | up | tripartite motif-containing 2                                                                           |
| 8021946 | COLEC12         | 1.157419  | up | collectin sub-family member 12                                                                          |
| 8063187 | EYA2            | 1.1573027 | up | eyes absent homolog 2 (Drosophila)                                                                      |
| 8160346 | PTPLAD2         | 1.1565727 | up | protein tyrosine phosphatase-like A domain containing 2                                                 |
| 8044346 | FLJ38359 LOC100 | 1.1562654 | up | hypothetical protein FLJ38359   hypothetical protein LOC100131150                                       |
| 8110520 | LOC729595       | 1.1560808 | up | similar to high-mobility group box 3                                                                    |
| 8041967 | C2orf30         | 1.155077  | up | chromosome 2 open reading frame 30                                                                      |
| 8014100 | C17orf75        | 1.1544751 | up | chromosome 17 open reading frame 75                                                                     |
| 7947947 | AGBL2           | 1.1541947 | up | ATP/GTP binding protein-like 2                                                                          |
| 8147030 | STMN2           | 1.1539356 | up | stathmin-like 2                                                                                         |
| 7925492 | OPN3            | 1.1538888 | up | opsin 3                                                                                                 |
| 8089026 | STX19           | 1.1536974 | up | syntaxin 19                                                                                             |
| 7928630 | EIF5AL1         | 1.1529628 | up | eukaryotic translation initiation factor 5A-like 1   eukaryotic translation initiation factor 5A-like 1 |
| 8067113 | ZNF217          | 1.1528574 | up | zinc finger protein 217                                                                                 |
| 7968678 | FREM2           | 1.1524881 | up | FRAS1 related extracellular matrix protein 2                                                            |

## Supplemental Table 1b

eMSC vs. eEN

|         |               |           |    |                                                                     |
|---------|---------------|-----------|----|---------------------------------------------------------------------|
| 8073799 | ATXN10        | 1.151935  | up | ataxin 10                                                           |
| 7911989 | RPL22         | 1.1513743 | up | ribosomal protein L22                                               |
| 7946454 | SCUBE2        | 1.1494939 | up | signal peptide, CUB domain, EGF-like 2                              |
| 7908793 | ELF3          | 1.1489024 | up | E74-like factor 3 (ets domain transcription factor, epitheli        |
| 8130720 | SFT2D1        | 1.1488949 | up | SFT2 domain containing 1                                            |
| 7959102 | HSPB8         | 1.1487769 | up | heat shock 22kDa protein 8                                          |
| 7909768 | SPATA17       | 1.1480969 | up | spermatogenesis associated 17                                       |
| 8123467 | C6orf70       | 1.1478026 | up | chromosome 6 open reading frame 70                                  |
| 8108703 | PCDHB6        | 1.1475387 | up | protocadherin beta 6                                                |
| 8108724 | PCDHB10       | 1.1471899 | up | protocadherin beta 10                                               |
| 8150143 | PURG          | 1.146527  | up | purine-rich element binding protein G                               |
| 8157487 | PAPPA         | 1.1459097 | up | pregnancy-associated plasma protein A, pappalysin 1                 |
| 7918323 | SORT1         | 1.1458026 | up | sortilin 1                                                          |
| 7930818 | DKFZp781N1041 | 1.1451409 | up | similar to RIKEN cDNA 6430537H07 gene                               |
| 8105908 | OCLN          | 1.1435337 | up | occludin                                                            |
| 8146024 | ADAM32        | 1.1434934 | up | ADAM metallopeptidase domain 32                                     |
| 8142697 | POT1          | 1.143258  | up |                                                                     |
| 8044849 | PTPN4         | 1.1430556 | up | protein tyrosine phosphatase, non-receptor type 4 (mega             |
| 8038993 | ZNF28         | 1.142829  | up | zinc finger protein 28                                              |
| 8078319 | ZCWPW2        | 1.1422269 | up | zinc finger, CW type with PWWP domain 2                             |
| 8051963 | SRBD1         | 1.1414999 | up | S1 RNA binding domain 1                                             |
| 7916343 | YIPF1         | 1.1412954 | up | Yip1 domain family, member 1                                        |
| 8033257 | C3            | 1.1410179 | up | complement component 3                                              |
| 8142471 | WNT2          | 1.1404085 | up | wingless-type MMTV integration site family member 2                 |
| 8150225 | RAB11FIP1     | 1.139688  | up | RAB11 family interacting protein 1 (class I)                        |
| 8143433 | MRPS33        | 1.1395916 | up | mitochondrial ribosomal protein S33                                 |
| 7927694 | PHYHIPL       | 1.139372  | up | phytanoyl-CoA 2-hydroxylase interacting protein-like                |
| 8150908 | IMPAD1        | 1.1390694 | up | inositol monophosphatase domain containing 1                        |
| 8040249 | ATP6V1C2      | 1.1385849 | up | ATPase, H <sup>+</sup> transporting, lysosomal 42kDa, V1 subunit C2 |
| 8037374 | PLAUR         | 1.1381333 | up | plasminogen activator, urokinase receptor                           |
| 7921862 | C1orf192      | 1.1380515 | up | chromosome 1 open reading frame 192                                 |
| 8143188 | CREB3L2       | 1.1380501 | up | cAMP responsive element binding protein 3-like 2                    |
| 7969390 | PIBF1         | 1.1380215 | up | progesterone immunomodulatory binding factor 1                      |

## Supplemental Table 1b

eMSC vs. eEN

|         |                |           |    |                                                              |
|---------|----------------|-----------|----|--------------------------------------------------------------|
| 7974125 | KIAA0423       | 1.1364714 | up |                                                              |
| 8088642 | LRIG1          | 1.1362857 | up | leucine-rich repeats and immunoglobulin-like domains 1       |
| 7934753 | EIF5AL1        | 1.1359674 | up | eukaryotic translation initiation factor 5A-like 1   eukaryo |
| 8167887 | MAGEH1         | 1.1343926 | up | melanoma antigen family H, 1                                 |
| 8020779 | DSG2           | 1.1333939 | up | desmoglein 2                                                 |
| 8054166 | TSGA10         | 1.1333244 | up | testis specific, 10                                          |
| 8163109 | C9orf4         | 1.1324052 | up | chromosome 9 open reading frame 4                            |
| 8041867 | MSH2           | 1.1318642 | up | mutS homolog 2, colon cancer, nonpolyposis type 1 (E. co     |
| 8114814 | NR3C1          | 1.1316291 | up | nuclear receptor subfamily 3, group C, member 1 (glucoccc    |
| 8095894 | MRPL1          | 1.1305107 | up | mitochondrial ribosomal protein L1                           |
| 7928600 | EIF5AL1        | 1.1304812 | up | eukaryotic translation initiation factor 5A-like 1   eukaryo |
| 7902367 | ACADM          | 1.1301979 | up | acyl-Coenzyme A dehydrogenase, C-4 to C-12 straight cha      |
| 8106950 | FAM81B         | 1.1301856 | up | family with sequence similarity 81, member B                 |
| 8140686 | SEMA3D         | 1.1301119 | up | sema domain, immunoglobulin domain (Ig), short basic dc      |
| 8113483 | XIRP1 FLJ43080 | 1.1299742 | up | xin actin-binding repeat containing 1   hypothetical protei  |
| 8131975 | TAX1BP1        | 1.1299205 | up | Tax1 (human T-cell leukemia virus type I) binding protein :  |
| 7926037 | PFKFB3         | 1.1297431 | up | 6-phosphofructo-2-kinase/fructose-2,6-biphosphatase 3        |
| 8121002 | C6orf162       | 1.1291349 | up | chromosome 6 open reading frame 162                          |
| 8014172 | CCT6B          | 1.129003  | up | chaperonin containing TCP1, subunit 6B (zeta 2)              |
| 7978391 | NOVA1          | 1.1283842 | up | neuro-oncological ventral antigen 1                          |
| 7983469 | SPATA5L1       | 1.127522  | up | spermatogenesis associated 5-like 1                          |
| 7910950 | KMO            | 1.1268159 | up | kynurenine 3-monooxygenase (kynurenine 3-hydroxylase)        |
| 7918759 | BCAS2 DENND2C  | 1.1260699 | up | breast carcinoma amplified sequence 2   DENN/MADD do         |
| 8068644 | IGSF5          | 1.1256188 | up | immunoglobulin superfamily, member 5                         |
| 8156575 | ATMIN          | 1.1249665 | up | ATM interactor                                               |
| 7918517 | WDR77          | 1.1244829 | up | WD repeat domain 77                                          |
| 8178298 | GABBR1         | 1.1244774 | up | gamma-aminobutyric acid (GABA) B receptor, 1                 |
| 8122409 | PEX3           | 1.1242898 | up | peroxisomal biogenesis factor 3                              |
| 8108435 | UBE2D2         | 1.1239378 | up | ubiquitin-conjugating enzyme E2D 2 (UBC4/5 homolog, ye       |
| 8103106 | LRBA           | 1.122612  | up | LPS-responsive vesicle trafficking, beach and anchor conta   |
| 8012126 | CLDN7          | 1.1221703 | up | claudin 7                                                    |
| 8089478 | GCET2          | 1.1221662 | up | germinal center expressed transcript 2                       |
| 7916843 | GNG12          | 1.1216104 | up | guanine nucleotide binding protein (G protein), gamma 12     |

## Supplemental Table 1b

eMSC vs. eEN

|         |               |           |    |                                                                    |
|---------|---------------|-----------|----|--------------------------------------------------------------------|
| 8060850 | BMP2          | 1.1213578 | up | bone morphogenetic protein 2                                       |
| 7923875 | C1orf186      | 1.1212186 | up | chromosome 1 open reading frame 186                                |
| 8082965 | MRAS          | 1.1206867 | up | muscle RAS oncogene homolog                                        |
| 8084627 | C3orf65       | 1.1204281 | up | chromosome 3 open reading frame 65                                 |
| 7974166 | FANCM         | 1.1203382 | up | Fanconi anemia, complementation group M                            |
| 7905754 | ATP8B2        | 1.1199337 | up | ATPase, class I, type 8B, member 2                                 |
| 8053648 | KRCC1         | 1.1187487 | up | lysine-rich coiled-coil 1                                          |
| 8116983 | CD83          | 1.1180658 | up |                                                                    |
| 8130032 | FBXO30        | 1.117752  | up | F-box protein 30                                                   |
| 7965343 | WDR51B GALNT4 | 1.1175606 | up | WD repeat domain 51B   UDP-N-acetyl-alpha-D-galactosa              |
| 7982829 | SPINT1        | 1.1172467 | up | serine peptidase inhibitor, Kunitz type 1                          |
| 8147697 | GRHL2         | 1.1164383 | up | grainyhead-like 2 (Drosophila)                                     |
| 8179595 | GABBR1        | 1.1133842 | up | gamma-aminobutyric acid (GABA) B receptor, 1                       |
| 7959330 | WDR66         | 1.1130704 | up | WD repeat domain 66                                                |
| 7981068 | SERPINA1      | 1.112728  | up | serpin peptidase inhibitor, clade A (alpha-1 antiproteinase        |
| 8165217 | NOTCH1        | 1.112598  | up | Notch homolog 1, translocation-associated (Drosophila)             |
| 7980098 | ALDH6A1       | 1.1125709 | up | aldehyde dehydrogenase 6 family, member A1                         |
| 7916570 | OMA1 DAB1     | 1.1124575 | up | OMA1 homolog, zinc metallopeptidase ( <i>S. cerevisiae</i> )   di- |
| 7919326 | ACP6          | 1.1124163 | up | acid phosphatase 6, lysophosphatidic                               |
| 8166355 | CNKS2         | 1.112025  | up | connector enhancer of kinase suppressor of Ras 2                   |
| 8155747 | C9orf135      | 1.1117027 | up | chromosome 9 open reading frame 135                                |
| 8089145 | ABI3BP        | 1.1111406 | up | ABI gene family, member 3 (NESH) binding protein                   |
| 7949765 | PPP1CA        | 1.1077687 | up | protein phosphatase 1, catalytic subunit, alpha isoform            |
| 8155898 | PCSK5         | 1.1077588 | up | proprotein convertase subtilisin/kexin type 5                      |
| 8083941 | ECT2          | 1.1070803 | up | epithelial cell transforming sequence 2 oncogene                   |
| 8156167 | MAK10         | 1.1057768 | up |                                                                    |
| 8022145 | L3MBTL4       | 1.1056678 | up | l(3)mbt-like 4 (Drosophila)                                        |
| 7917276 | LPAR3         | 1.1053039 | up | lysophosphatidic acid receptor 3                                   |
| 7957793 | ACTR6         | 1.105212  | up | ARP6 actin-related protein 6 homolog (yeast)                       |
| 8174779 | LAMP2         | 1.1050149 | up | lysosomal-associated membrane protein 2                            |
| 7965855 | NUP37         | 1.104473  | up | nucleoporin 37kDa                                                  |
| 8120552 | FAM135A       | 1.1039008 | up | family with sequence similarity 135, member A                      |
| 8112865 | SERINC5       | 1.1020538 | up | serine incorporator 5                                              |

## Supplemental Table 1b

eMSC vs. eEN

|         |               |           |    |                                                           |
|---------|---------------|-----------|----|-----------------------------------------------------------|
| 8105663 | NLN           | 1.1012806 | up | neurolysin (metallopeptidase M3 family)                   |
| 8055220 | A26C1A A26C1B | 1.1012094 | up | ANKRD26-like family C, member 1A   ANKRD26-like family    |
| 8179704 | IER3          | 1.1011249 | up | immediate early response 3                                |
| 8042291 | AFTPH         | 1.1003486 | up | aftiphilin                                                |
| 8147396 | INTS8         | 1.1001006 | up | integrator complex subunit 8                              |
| 8023267 | MYO5B         | 1.0994185 | up | myosin VB                                                 |
| 8036284 | COX7A1        | 1.0992781 | up | cytochrome c oxidase subunit VIIa polypeptide 1 (muscle)  |
| 8124848 | IER3          | 1.0989699 | up | immediate early response 3                                |
| 8144481 | DEFB4         | 1.0987939 | up | defensin, beta 4                                          |
| 7945371 | IFITM3        | 1.0986768 | up | interferon induced transmembrane protein 3 (1-8U)         |
| 8155422 | CBWD5 CBWD2 C | 1.0985296 | up | COBW domain containing 5   COBW domain containing 2       |
| 8138977 | DPY19L1       | 1.098528  | up | dpy-19-like 1 (C. elegans)                                |
| 8135211 | MGC35361      | 1.0984441 | up |                                                           |
| 8083282 | HPS3          | 1.0982811 | up | Hermansky-Pudlak syndrome 3                               |
| 7961514 | MGP           | 1.0981915 | up | matrix Gla protein                                        |
| 8056837 | GPR155        | 1.0979977 | up | G protein-coupled receptor 155                            |
| 7932598 | C10orf63      | 1.097523  | up | chromosome 10 open reading frame 63                       |
| 8142646 | IQUB          | 1.0975006 | up | IQ motif and ubiquitin domain containing                  |
| 8076046 | TMEM184B      | 1.0972912 | up | transmembrane protein 184B                                |
| 8118142 | TNF           | 1.096794  | up |                                                           |
| 8167305 | EBP           | 1.0966994 | up | emopamil binding protein (sterol isomerase)               |
| 8159900 | GLIS3         | 1.0966768 | up | GLIS family zinc finger 3                                 |
| 8112274 | ELOVL7        | 1.0965912 | up | ELOVL family member 7, elongation of long chain fatty aci |
| 8098620 | FAM149A       | 1.0960851 | up | family with sequence similarity 149, member A             |
| 8164252 | SH2D3C        | 1.0958664 | up | SH2 domain containing 3C                                  |
| 7918936 | VTCN1         | 1.0952436 | up | V-set domain containing T cell activation inhibitor 1     |
| 7949496 | CFL1          | 1.0950478 | up | cofilin 1 (non-muscle)                                    |
| 8065403 | CST3          | 1.0946635 | up | cystatin C                                                |
| 8174610 | LRCH2         | 1.09415   | up | leucine-rich repeats and calponin homology (CH) domain c  |
| 7961844 | CASC1         | 1.0933815 | up | cancer susceptibility candidate 1                         |
| 8179263 | TNF           | 1.0933722 | up |                                                           |
| 7901765 | HOOK1         | 1.0931563 | up | hook homolog 1 (Drosophila)                               |
| 7901175 | TSPAN1        | 1.0929533 | up | tetraspanin 1                                             |

Supplemental Table 1b  
eMSC vs. eEN

|         |                |           |    |                                                                          |
|---------|----------------|-----------|----|--------------------------------------------------------------------------|
| 8002446 | HYDIN HYDIN2   | 1.0926648 | up | hydrocephalus inducing homolog (mouse)   hydrocephalu                    |
| 8160637 | B4GALT1        | 1.0924369 | up | UDP-Gal:betaGlcNAc beta 1,4- galactosyltransferase, poly                 |
| 7951545 | EXPH5          | 1.0921358 | up | exophilin 5                                                              |
| 7993756 | ACSM3          | 1.0917546 | up | acyl-CoA synthetase medium-chain family member 3                         |
| 8094441 | SLC34A2        | 1.091499  | up | solute carrier family 34 (sodium phosphate), member 2                    |
| 8117189 | KAAG1          | 1.0912182 | up | kidney associated antigen 1                                              |
| 8177983 | TNF            | 1.0905267 | up |                                                                          |
| 7926638 | ARMC3          | 1.0901433 | up | armadillo repeat containing 3                                            |
| 7924309 | ESRRG          | 1.089519  | up | estrogen-related receptor gamma                                          |
| 7965573 | NTN4           | 1.0890783 | up | netrin 4                                                                 |
| 8136177 | KIAA0265       | 1.0890543 | up |                                                                          |
| 7920285 | S100A2         | 1.087966  | up | S100 calcium binding protein A2                                          |
| 8114797 | SPRY4          | 1.087697  | up | sprouty homolog 4 (Drosophila)                                           |
| 8173414 | SLC7A3         | 1.087506  | up | solute carrier family 7 (cationic amino acid transporter, y+             |
| 7965523 | NR2C1          | 1.0868652 | up | nuclear receptor subfamily 2, group C, member 1                          |
| 8147375 | DPY19L4        | 1.0867447 | up | dpy-19-like 4 (C. elegans)                                               |
| 8088866 | CNTN3          | 1.0859832 | up | contactin 3 (plasmacytoma associated)                                    |
| 8098021 | GRIA2          | 1.0858274 | up | glutamate receptor, ionotropic, AMPA 2                                   |
| 8149169 | DEFB4          | 1.0856818 | up | defensin, beta 4                                                         |
| 8145586 | ELP3           | 1.0851529 | up | elongation protein 3 homolog (S. cerevisiae)                             |
| 8020702 | TAF4B          | 1.0850346 | up | TAF4b RNA polymerase II, TATA box binding protein (TBP)                  |
| 7955613 | KRT7           | 1.0848558 | up | keratin 7                                                                |
| 7907160 | ATP1B1         | 1.0835105 | up | ATPase, Na <sup>+</sup> /K <sup>+</sup> transporting, beta 1 polypeptide |
| 7987405 | RASGRP1        | 1.0828125 | up | RAS guanyl releasing protein 1 (calcium and DAG-regulate                 |
| 7916506 | C1orf168       | 1.0815399 | up | chromosome 1 open reading frame 168                                      |
| 8155802 | GDA            | 1.0811304 | up | guanine deaminase                                                        |
| 8002692 | ZFH3           | 1.0810091 | up | zinc finger homeobox 3                                                   |
| 8157890 | PBX3           | 1.078398  | up | pre-B-cell leukemia homeobox 3                                           |
| 8044613 | CBWD1 CBWD3 C  | 1.078224  | up | COBW domain containing 1   COBW domain containing 3                      |
| 7910030 | C1orf67 DNAH14 | 1.0779796 | up | chromosome 1 open reading frame 67   dynein, axonema                     |
| 7989501 | CA12           | 1.0778853 | up | carbonic anhydrase XII                                                   |
| 8150565 | RNF170         | 1.077221  | up | ring finger protein 170                                                  |
| 8067955 | CXADR          | 1.0769578 | up | coxsackie virus and adenovirus receptor                                  |

## Supplemental Table 1b

eMSC vs. eEN

|         |               |           |    |                                                            |
|---------|---------------|-----------|----|------------------------------------------------------------|
| 8144516 | THEX1         | 1.0769507 | up | three prime histone mRNA exonuclease 1                     |
| 7902592 | ARID3B        | 1.0768777 | up | AT rich interactive domain 3B (BRIGHT-like)                |
| 8154132 | C9orf70       | 1.0766503 | up | chromosome 9 open reading frame 70                         |
| 8135341 | FLJ23834      | 1.0763476 | up |                                                            |
| 8091385 | CP            | 1.0763342 | up | ceruloplasmin (ferroxidase)                                |
| 8035789 | ZNF826 ZNF737 | 1.0760367 | up | zinc finger protein 826   zinc finger protein 737          |
| 8171006 | BRCC3         | 1.0758443 | up | BRCA1/BRCA2-containing complex, subunit 3                  |
| 8178590 | DDAH2         | 1.0737779 | up | dimethylarginine dimethylaminohydrolase 2                  |
| 8041561 | MORN2         | 1.0737575 | up | MORN repeat containing 2                                   |
| 8124654 | GABBR1        | 1.0736523 | up | gamma-aminobutyric acid (GABA) B receptor, 1               |
| 8042310 | SLC1A4        | 1.0734955 | up | solute carrier family 1 (glutamate/neutral amino acid tran |
| 8155636 | CBWD3 CBWD1 C | 1.073473  | up | COBW domain containing 3   COBW domain containing 1        |
| 8105111 | FBXO4         | 1.0733413 | up | F-box protein 4                                            |
| 7974425 | SAMD4A        | 1.0728984 | up | sterile alpha motif domain containing 4A                   |
| 8179819 | DDAH2         | 1.0728464 | up | dimethylarginine dimethylaminohydrolase 2                  |
| 7972269 | TGDS          | 1.0711393 | up | TDP-glucose 4,6-dehydratase                                |
| 8123893 | MAK           | 1.0707695 | up | male germ cell-associated kinase                           |
| 8171624 | GPR64         | 1.0707444 | up | G protein-coupled receptor 64                              |
| 7906079 | RAB25         | 1.0706999 | up |                                                            |
| 8161537 | CBWD3 CBWD1 C | 1.0703462 | up | COBW domain containing 3   COBW domain containing 1        |
| 8044605 | LOC654433     | 1.0702918 | up |                                                            |
| 8040113 | DDEF2         | 1.0701585 | up | development and differentiation enhancing factor 2         |
| 8082673 | ACPP          | 1.0700973 | up | acid phosphatase, prostate                                 |
| 8167930 | FAAH2         | 1.0700792 | up | fatty acid amide hydrolase 2                               |
| 8138789 | JAZF1         | 1.0698787 | up | JAZF zinc finger 1                                         |
| 8116051 | DBN1          | 1.06937   | up | drebrin 1                                                  |
| 7938989 | GAS2          | 1.0683091 | up | growth arrest-specific 2                                   |
| 8091922 | WDR49         | 1.0681971 | up | WD repeat domain 49                                        |
| 8057677 | SLC40A1       | 1.0679694 | up | solute carrier family 40 (iron-regulated transporter), mem |
| 8154670 | IFT74         | 1.0672183 | up | intraflagellar transport 74 homolog (Chlamydomonas)        |
| 7902977 | KIAA1107      | 1.0670158 | up |                                                            |
| 8043055 | DNAH6         | 1.066938  | up | dynein, axonemal, heavy chain 6                            |
| 8044236 | GCC2          | 1.0661348 | up | GRIP and coiled-coil domain containing 2                   |

## Supplemental Table 1b

eMSC vs. eEN

|         |                 |           |    |                                                           |
|---------|-----------------|-----------|----|-----------------------------------------------------------|
| 8124798 | KIAA1949        | 1.0659187 | up |                                                           |
| 7965357 | GALNT4          | 1.0657066 | up | UDP-N-acetyl-alpha-D-galactosamine:polypeptide N-acetyl   |
| 8126259 | C6orf130        | 1.0656943 | up | chromosome 6 open reading frame 130                       |
| 7931754 | IDI1            | 1.0654281 | up | isopentenyl-diphosphate delta isomerase 1                 |
| 8120613 | RIMS1           | 1.0647215 | up | regulating synaptic membrane exocytosis 1                 |
| 7986428 | LOC400464       | 1.0639437 | up | similar to FLJ43276 protein                               |
| 7954196 | MGST1           | 1.0638882 | up | microsomal glutathione S-transferase 1                    |
| 8033674 | MUC16           | 1.0637853 | up | mucin 16, cell surface associated                         |
| 8142270 | NRCAM           | 1.0623571 | up | neuronal cell adhesion molecule                           |
| 7917283 | MCOLN2          | 1.0623395 | up | mucoilin 2                                                |
| 8114326 | C5orf5          | 1.0615804 | up | chromosome 5 open reading frame 5                         |
| 8156160 | LOC100129901    | 1.0604179 | up | similar to KIF27B                                         |
| 7918593 | RHOC            | 1.0600333 | up | ras homolog gene family, member C                         |
| 7958352 | BTBD11          | 1.0592738 | up | BTB (POZ) domain containing 11                            |
| 8063729 | EDN3            | 1.0590492 | up | endothelin 3                                              |
| 7937330 | IFITM2          | 1.0589433 | up | interferon induced transmembrane protein 2 (1-8D)         |
| 8062623 | PLCG1           | 1.0587887 | up | phospholipase C, gamma 1                                  |
| 8051785 | KCNG3           | 1.058563  | up | potassium voltage-gated channel, subfamily G, member 3    |
| 7951429 | KBTBD3          | 1.0577184 | up | kelch repeat and BTB (POZ) domain containing 3            |
| 8174029 | TAF7L           | 1.0560924 | up | TAF7-like RNA polymerase II, TATA box binding protein (Tl |
| 8120335 | FAM83B          | 1.0558075 | up | family with sequence similarity 83, member B              |
| 8070411 | C21orf88 LOC100 | 1.0551943 | up | chromosome 21 open reading frame 88   similar to C21or    |
| 8086517 | CDCP1           | 1.0551633 | up | CUB domain containing protein 1                           |
| 7898623 | UBXD3           | 1.0548483 | up | UBX domain containing 3                                   |
| 8165024 | C9orf116        | 1.0545642 | up | chromosome 9 open reading frame 116                       |
| 7916616 | CYP2J2          | 1.0539649 | up | cytochrome P450, family 2, subfamily J, polypeptide 2     |
| 7918294 | C1orf194        | 1.0539261 | up | chromosome 1 open reading frame 194                       |
| 8054511 | LOC205251       | 1.0538187 | up |                                                           |
| 8172220 | NDP             | 1.0534866 | up | Norrie disease (pseudoglioma)                             |
| 8109912 | KCNIP1          | 1.0530261 | up | Kv channel interacting protein 1                          |
| 8096116 | AGPAT9          | 1.0515584 | up | 1-acylglycerol-3-phosphate O-acyltransferase 9            |
| 8124134 | TPMT            | 1.0508306 | up | thiopurine S-methyltransferase                            |
| 8044818 | hCG_17324       | 1.0505567 | up | primary ciliary dyskinesia protein 1                      |



## Supplemental Table 1b

eMSC vs. eEN

|         |                 |           |    |                                                           |
|---------|-----------------|-----------|----|-----------------------------------------------------------|
| 7950307 | UCP2            | 1.0494447 | up | uncoupling protein 2 (mitochondrial, proton carrier)      |
| 8163908 | GGTA1           | 1.0484526 | up | glycoprotein, alpha-galactosyltransferase 1               |
| 8138392 | AGR3            | 1.0480174 | up | anterior gradient homolog 3 ( <i>Xenopus laevis</i> )     |
| 7952341 | ASAM            | 1.0469728 | up | adipocyte-specific adhesion molecule                      |
| 7943795 | C11orf52        | 1.0468811 | up | chromosome 11 open reading frame 52                       |
| 8144230 | ZNF596          | 1.0468234 | up | zinc finger protein 596                                   |
| 8088315 | ASB14 DNAH12    | 1.0467855 | up | ankyrin repeat and SOCS box-containing 14   dynein, axor  |
| 8081826 | UPK1B           | 1.046652  | up | uroplakin 1B                                              |
| 7951686 | IL18            | 1.0464164 | up | interleukin 18 (interferon-gamma-inducing factor)         |
| 7966202 | KCTD10          | 1.0463146 | up | potassium channel tetramerisation domain containing 10    |
| 8044700 | DPP10           | 1.0460485 | up | dipeptidyl-peptidase 10                                   |
| 8058498 | FZD5            | 1.0459962 | up | frizzled homolog 5 ( <i>Drosophila</i> )                  |
| 8151296 | LACTB2          | 1.0458243 | up | lactamase, beta 2                                         |
| 8110084 | MSX2            | 1.0455421 | up | msh homeobox 2                                            |
| 7924029 | LAMB3           | 1.0447453 | up | laminin, beta 3                                           |
| 8087337 | LAMB2           | 1.0446948 | up | laminin, beta 2 (laminin 5)                               |
| 8105862 | CDK7            | 1.0446581 | up | cyclin-dependent kinase 7                                 |
| 8178598 | CLIC1           | 1.0445834 | up | chloride intracellular channel 1                          |
| 8136979 | CTAGE6 CTAGE4   | 1.0442739 | up | CTAGE family, member 6   CTAGE family, member 4   CTA     |
| 8100984 | CXCL3           | 1.0439957 | up | chemokine (C-X-C motif) ligand 3                          |
| 8131475 | C1GALT1         | 1.0439725 | up | core 1 synthase, glycoprotein-N-acetylgalactosamine 3-be  |
| 7975632 | ZADH1           | 1.0438294 | up | zinc binding alcohol dehydrogenase, domain containing 1   |
| 7953520 | LRRC23          | 1.0435469 | up | leucine rich repeat containing 23                         |
| 7945321 | GLB1L2          | 1.0433909 | up | galactosidase, beta 1-like 2                              |
| 8177462 | CDK7            | 1.0433762 | up | cyclin-dependent kinase 7                                 |
| 8167592 | PAGE4           | 1.0430903 | up | P antigen family, member 4 (prostate associated)          |
| 8095758 | RCHY1           | 1.0418653 | up | ring finger and CHY zinc finger domain containing 1       |
| 7997374 | DYNLRB2         | 1.041518  | up | dynein, light chain, roadblock-type 2                     |
| 8054513 | FLJ38359 LOC100 | 1.0415084 | up | hypothetical protein FLJ38359   hypothetical protein LOC: |
| 8019802 | RNU2 RNU2B WC   | 1.0408229 | up | RNA, U2 small nuclear   RNA, U2B small nuclear   WD rep   |
| 7963567 | KRT8            | 1.0406803 | up | keratin 8                                                 |
| 8037005 | TGFB1           | 1.0401458 | up | transforming growth factor, beta 1                        |
| 8079598 | ZNF589          | 1.0397696 | up | zinc finger protein 589                                   |

## Supplemental Table 1b

eMSC vs. eEN

|         |                 |           |    |                                                              |
|---------|-----------------|-----------|----|--------------------------------------------------------------|
| 8179827 | CLIC1           | 1.0394876 | up | chloride intracellular channel 1                             |
| 7979510 | SIX4            | 1.039308  | up | SIX homeobox 4                                               |
| 7973727 | KIAA1305        | 1.0391622 | up |                                                              |
| 8085062 | IL5RA           | 1.0390668 | up | interleukin 5 receptor, alpha                                |
| 8123246 | SLC22A3         | 1.0383193 | up | solute carrier family 22 (extraneuronal monoamine transp     |
| 8043059 | LOC200383       | 1.0383049 | up | similar to Dynein heavy chain at 16F                         |
| 8090577 | MBD4            | 1.037167  | up | methyl-CpG binding domain protein 4                          |
| 8107119 | TMEM157         | 1.0368681 | up | transmembrane protein 157                                    |
| 8127743 | HMG3            | 1.0367677 | up | high mobility group nucleosomal binding domain 3             |
| 8147273 | SLC26A7 LOC1001 | 1.0364054 | up | solute carrier family 26, member 7   similar to hCG20085     |
| 8145293 | ADAM28          | 1.0360076 | up | ADAM metalloproteinase domain 28                             |
| 8001149 | VPS35           | 1.0356128 | up | vacuolar protein sorting 35 homolog ( <i>S. cerevisiae</i> ) |
| 7932407 | ST8SIA6         | 1.0351698 | up | ST8 alpha-N-acetyl-neuraminide alpha-2,8-sialyltransferas    |
| 8085732 | EFHB            | 1.0340235 | up | EF-hand domain family, member B                              |
| 7959807 | TMEM132B        | 1.033926  | up | transmembrane protein 132B                                   |
| 8175177 | MBNL3           | 1.0331067 | up | muscleblind-like 3 ( <i>Drosophila</i> )                     |
| 7973875 | NPAS3           | 1.0329647 | up | neuronal PAS domain protein 3                                |
| 8043071 | LOC200383       | 1.0329591 | up | similar to Dynein heavy chain at 16F                         |
| 7898988 | CLIC4           | 1.0329168 | up | chloride intracellular channel 4                             |
| 8125059 | CLIC1           | 1.0328851 | up | chloride intracellular channel 1                             |
| 8157446 | ORM1            | 1.032597  | up | orosomuroid 1                                                |
| 8044417 | TMEM87B         | 1.0324981 | up | transmembrane protein 87B                                    |
| 8019705 | RNU2 RNU2B WC   | 1.0323257 | up | RNA, U2 small nuclear   RNA, U2B small nuclear   WD rep      |
| 8019633 | RNU2 RNU2B WC   | 1.0322895 | up | RNA, U2 small nuclear   RNA, U2B small nuclear   WD rep      |
| 8019703 | RNU2 RNU2B WC   | 1.0322417 | up | RNA, U2 small nuclear   RNA, U2B small nuclear   WD rep      |
| 8019707 | RNU2 RNU2B WC   | 1.0322407 | up | RNA, U2 small nuclear   RNA, U2B small nuclear   WD rep      |
| 8019641 | RNU2 RNU2B WC   | 1.0320369 | up | RNA, U2 small nuclear   RNA, U2B small nuclear   WD rep      |
| 8019631 | RNU2 RNU2B WC   | 1.0320191 | up | RNA, U2 small nuclear   RNA, U2B small nuclear   WD rep      |
| 8019635 | RNU2 RNU2B WC   | 1.0318854 | up | RNA, U2 small nuclear   RNA, U2B small nuclear   WD rep      |
| 8019639 | RNU2 RNU2B WC   | 1.0317967 | up | RNA, U2 small nuclear   RNA, U2B small nuclear   WD rep      |
| 8019637 | RNU2 RNU2B WC   | 1.0317225 | up | RNA, U2 small nuclear   RNA, U2B small nuclear   WD rep      |
| 7964987 | KCNC2           | 1.0308174 | up | potassium voltage-gated channel, Shaw-related subfamily      |
| 7990757 | CTSH            | 1.0307306 | up | cathepsin H                                                  |

## Supplemental Table 1b

eMSC vs. eEN

|         |                   |           |    |                                                                   |
|---------|-------------------|-----------|----|-------------------------------------------------------------------|
| 7925452 | GREM2             | 1.0295186 | up | gremlin 2, cysteine knot superfamily, homolog (Xenopus laevis)    |
| 8171561 | SCML2             | 1.0294921 | up | sex comb on midleg-like 2 (Drosophila)                            |
| 8039006 | ZNF320            | 1.0293115 | up | zinc finger protein 320                                           |
| 8077899 | PPARG             | 1.0292542 | up | peroxisome proliferator-activated receptor gamma                  |
| 8088560 | ADAMTS9           | 1.0291296 | up | ADAM metalloproteinase with thrombospondin type 1 motifs          |
| 8090180 | MUC13             | 1.029062  | up | mucin 13, cell surface associated                                 |
| 8091887 | ZBBX              | 1.0289779 | up | zinc finger, B-box domain containing                              |
| 8133233 | AUTS2             | 1.0287218 | up | autism susceptibility candidate 2                                 |
| 8095744 | AREG   LOC727738  | 1.0285411 | up | amphiregulin (schwannoma-derived growth factor)   similar         |
| 8097628 | HHIP              | 1.0284569 | up | hedgehog interacting protein                                      |
| 7915147 | FHL3              | 1.0282667 | up | four and a half LIM domains 3                                     |
| 7988990 | WDR72             | 1.028182  | up | WD repeat domain 72                                               |
| 8104492 | ROPN1L            | 1.0281434 | up | ropporin 1-like                                                   |
| 8088322 | DNAH12L           | 1.0276424 | up | dynein, axonemal, heavy chain 12-like                             |
| 8020037 | KIAA0802          | 1.02707   | up |                                                                   |
| 8089659 | KIAA1407          | 1.026975  | up |                                                                   |
| 8017061 | TEX14             | 1.0268513 | up | testis expressed 14                                               |
| 8173825 | RPS6KA6           | 1.0265772 | up | ribosomal protein S6 kinase, 90kDa, polypeptide 6                 |
| 7905428 | TUFT1             | 1.0263151 | up | tuftelin 1                                                        |
| 7903959 | C1orf88           | 1.0260884 | up | chromosome 1 open reading frame 88                                |
| 8058591 | ACADL             | 1.0259603 | up | acyl-Coenzyme A dehydrogenase, long chain                         |
| 8122071 | ENPP3             | 1.0256827 | up | ectonucleotide pyrophosphatase/phosphodiesterase 3                |
| 8146625 | NKAIN3            | 1.0256166 | up | Na <sup>+</sup> /K <sup>+</sup> transporting ATPase interacting 3 |
| 7964927 | TSPAN8            | 1.0252675 | up | tetraspanin 8                                                     |
| 7909801 | LYPLAL1           | 1.0250782 | up | lysophospholipase-like 1                                          |
| 8154892 | DNAI1             | 1.0250245 | up | dynein, axonemal, intermediate chain 1                            |
| 8121622 | RSHL3             | 1.0247657 | up | radial spokehead-like 3                                           |
| 7916747 | JAK1              | 1.024451  | up | Janus kinase 1 (a protein tyrosine kinase)                        |
| 8129618 | VNN1              | 1.0238112 | up | vanin 1                                                           |
| 8019709 | RNU2   RNU2B   WC | 1.0236245 | up | RNA, U2 small nuclear   RNA, U2B small nuclear   WD rep           |
| 8028652 | ZFP36             | 1.0234468 | up | zinc finger protein 36, C3H type, homolog (mouse)                 |
| 8135405 | GPR22             | 1.0233841 | up | G protein-coupled receptor 22                                     |
| 7926356 | PTER              | 1.0231893 | up | phosphotriesterase related                                        |

## Supplemental Table 1b

eMSC vs. eEN

|         |                 |           |    |                                                               |
|---------|-----------------|-----------|----|---------------------------------------------------------------|
| 8130664 | C6orf118        | 1.0229734 | up | chromosome 6 open reading frame 118                           |
| 8112890 | MED27 LOC44108  | 1.0228336 | up | mediator complex subunit 27   CRSP8 pseudogene                |
| 8107920 | SLC22A5         | 1.0225663 | up | solute carrier family 22 (organic cation/carnitine transport) |
| 8019765 | ARHGDI A        | 1.022564  | up | Rho GDP dissociation inhibitor (GDI) alpha                    |
| 8111993 | FGF10           | 1.0221804 | up | fibroblast growth factor 10                                   |
| 8130768 | RNASET2 LOC100  | 1.0218735 | up | ribonuclease T2   hypothetical protein LOC100131869           |
| 8049969 | SH3YL1          | 1.0218564 | up | SH3 domain containing, Ysc84-like 1 ( <i>S. cerevisiae</i> )  |
| 8173955 | SYTL4           | 1.0203685 | up | synaptotagmin-like 4 (granuphilin-a)                          |
| 8140620 | PCLO            | 1.0202165 | up | piccolo (presynaptic cytomatrix protein)                      |
| 8083146 | PLS1            | 1.0201046 | up | plastin 1 (I isoform)                                         |
| 8066402 | C20orf111       | 1.0187589 | up | chromosome 20 open reading frame 111                          |
| 8104394 | ADCY2           | 1.0186934 | up | adenylate cyclase 2 (brain)                                   |
| 8056710 | LOC129881       | 1.0177464 | up |                                                               |
| 7930148 | SFXN2           | 1.0175456 | up | sideroflexin 2                                                |
| 8111255 | CDH10           | 1.0173182 | up | cadherin 10, type 2 (T2-cadherin)                             |
| 8123101 | LOC100130967 Cf | 1.0164483 | up | similar to hCG2044932   chromosome 6 open reading frame       |
| 8069553 | NRIP1           | 1.0160273 | up | nuclear receptor interacting protein 1                        |
| 8063601 | C20orf85        | 1.0159374 | up | chromosome 20 open reading frame 85                           |
| 7901720 | PRKAA2          | 1.0157989 | up | protein kinase, AMP-activated, alpha 2 catalytic subunit      |
| 7975238 | PLEKHH1         | 1.0155703 | up | pleckstrin homology domain containing, family H (with M)      |
| 8151369 | RPESP           | 1.0154759 | up | RPE-spondin                                                   |
| 8150112 | GSR             | 1.01513   | up | glutathione reductase                                         |
| 7916541 | DAB1            | 1.0148915 | up | disabled homolog 1 ( <i>Drosophila</i> )                      |
| 8035773 | ZNF506          | 1.0148435 | up | zinc finger protein 506                                       |
| 7965486 | CCDC41          | 1.0147778 | up | coiled-coil domain containing 41                              |
| 8070603 | RSPH1           | 1.0144693 | up | radial spoke head 1 homolog ( <i>Chlamydomonas</i> )          |
| 8156770 | GALNT12         | 1.0144129 | up | UDP-N-acetyl-alpha-D-galactosamine:polypeptide N-acetyl       |
| 8103877 | CLDN22          | 1.0141245 | up | claudin 22                                                    |
| 8124498 | ZNF204          | 1.0138518 | up | zinc finger protein 204 (pseudogene)                          |
| 8022711 | DSC2            | 1.0133368 | up | desmocollin 2                                                 |
| 8096556 | METAP1          | 1.0132054 | up | methionyl aminopeptidase 1                                    |
| 8047062 | MGC13057        | 1.0127742 | up |                                                               |
| 7917976 | SASS6           | 1.0118657 | up | spindle assembly 6 homolog ( <i>C. elegans</i> )              |

Supplemental Table 1b  
eMSC vs. eEN

|         |                |           |    |                                                                 |
|---------|----------------|-----------|----|-----------------------------------------------------------------|
| 8054712 | IL1A           | 1.0112283 | up | interleukin 1, alpha                                            |
| 8096602 | DAPP1          | 1.0110184 | up | dual adaptor of phosphotyrosine and 3-phosphoinositides         |
| 8056217 | MXRA7          | 1.0108707 | up | matrix-remodelling associated 7                                 |
| 7968866 | C13orf30       | 1.0105304 | up | chromosome 13 open reading frame 30                             |
| 8045835 | GALNT5         | 1.0104419 | up | UDP-N-acetyl-alpha-D-galactosamine:polypeptide N-acetyl         |
| 7918504 | OVGP1          | 1.0102895 | up | oviductal glycoprotein 1, 120kDa (mucin 9, oviductin)           |
| 7926708 | THNSL1         | 1.0099031 | up | threonine synthase-like 1 ( <i>S. cerevisiae</i> )              |
| 7935270 | BLNK           | 1.0097604 | up | B-cell linker                                                   |
| 8082597 | COL6A6         | 1.009521  | up | collagen type VI alpha 6                                        |
| 8150978 | CA8            | 1.0092129 | up | carbonic anhydrase VIII                                         |
| 8149097 | DEFB1          | 1.0088515 | up | defensin, beta 1                                                |
| 7952243 | C1QTNF5 MFRP   | 1.0088124 | up | C1q and tumor necrosis factor related protein 5   membr         |
| 8081138 | EPHA6          | 1.0081949 | up | EPH receptor A6                                                 |
| 8105633 | PPWD1          | 1.0081522 | up | peptidylprolyl isomerase domain and WD repeat containir         |
| 8094988 | FLJ21511       | 1.0076138 | up |                                                                 |
| 8089835 | FSTL1          | 1.0074561 | up | folliculin-like 1                                               |
| 8082003 | EAF2           | 1.0074254 | up | ELL associated factor 2                                         |
| 8129837 | IL20RA         | 1.0066411 | up | interleukin 20 receptor, alpha                                  |
| 7957023 | LYZ            | 1.006499  | up | lysozyme (renal amyloidosis)                                    |
| 7906904 | HSD17B7 HSD17B | 1.0064176 | up | hydroxysteroid (17-beta) dehydrogenase 7   hydroxysterc         |
| 7909494 | SYT14          | 1.0059943 | up | synaptotagmin XIV                                               |
| 7917255 | SSX2IP         | 1.0056758 | up | synovial sarcoma, X breakpoint 2 interacting protein            |
| 7964759 | GRIP1          | 1.0056522 | up | glutamate receptor interacting protein 1                        |
| 8102567 | PRDM5          | 1.0047395 | up | PR domain containing 5                                          |
| 7961524 | ERP27          | 1.004675  | up | endoplasmic reticulum protein 27 kDa                            |
| 8099967 | RBM47          | 1.0043464 | up | RNA binding motif protein 47                                    |
| 7924055 | C1orf74        | 1.0040729 | up | chromosome 1 open reading frame 74                              |
| 8023575 | CCBE1          | 1.0038248 | up | collagen and calcium binding EGF domains 1                      |
| 8127087 | GSTA3          | 1.0037085 | up | glutathione S-transferase A3                                    |
| 8043835 | C2orf15 MRPL30 | 1.0037063 | up | chromosome 2 open reading frame 15   mitochondrial rib          |
| 7968556 | KL             | 1.003576  | up | klotho                                                          |
| 7968883 | C13orf31       | 1.0034871 | up | chromosome 13 open reading frame 31                             |
| 8142332 | IMMP2L         | 1.002203  | up | IMP2 inner mitochondrial membrane peptidase-like ( <i>S. ce</i> |

## Supplemental Table 1b

eMSC vs. eEN

|         |                 |            |      |                                                                        |
|---------|-----------------|------------|------|------------------------------------------------------------------------|
| 8131803 | IL6             | 1.0021057  | up   | interleukin 6 (interferon, beta 2)                                     |
| 8083743 | ARL14           | 1.0020446  | up   | ADP-ribosylation factor-like 14                                        |
| 8021496 | KIAA1468        | 1.001515   | up   |                                                                        |
| 7974080 | MIA2            | 1.0008153  | up   | melanoma inhibitory activity 2                                         |
| 8160531 | C9orf72         | 1.0007925  | up   | chromosome 9 open reading frame 72                                     |
| 8078360 | STT3B           | 1.0002722  | up   | STT3, subunit of the oligosaccharyltransferase complex, h              |
| 8056611 | LRP2            | -1.0004069 | down | low density lipoprotein-related protein 2                              |
| 8147351 | RBM35A          | -1.0005667 | down | RNA binding motif protein 35A                                          |
| 8126750 | ENPP5           | -1.0010216 | down | ectonucleotide pyrophosphatase/phosphodiesterase 5 (p                  |
| 7915170 | MYCBP GJA9      | -1.0010635 | down | c-myc binding protein   gap junction protein, alpha 9, 59k             |
| 7962579 | AMIGO2          | -1.0025002 | down | adhesion molecule with Ig-like domain 2                                |
| 8023314 | CCDC11          | -1.0025126 | down | coiled-coil domain containing 11                                       |
| 8066542 | SPINLW1 WFDC6   | -1.0025325 | down | serine peptidase inhibitor-like, with Kunitz and WAP dom               |
| 8070398 | LCA5L           | -1.0025425 | down | Leber congenital amaurosis 5-like                                      |
| 8074856 | PRAME           | -1.0032185 | down | preferentially expressed antigen in melanoma                           |
| 8174351 | NUP62CL         | -1.0034317 | down | nucleoporin 62kDa C-terminal like                                      |
| 8157632 | C9orf18         | -1.003483  | down | chromosome 9 open reading frame 18                                     |
| 8019263 | ARHGDI4         | -1.0035332 | down | Rho GDP dissociation inhibitor (GDI) alpha                             |
| 8111998 | HCN1            | -1.0036273 | down | hyperpolarization activated cyclic nucleotide-gated potass             |
| 8081001 | ROBO2           | -1.0036508 | down | roundabout, axon guidance receptor, homolog 2 (Drosoph                 |
| 8015133 | KRT23           | -1.0044975 | down | keratin 23 (histone deacetylase inducible)                             |
| 8124897 | PSORS1C3 LOC100 | -1.0046115 | down | psoriasis susceptibility 1 candidate 3   similar to psoriasis          |
| 8058670 | IKZF2           | -1.0052077 | down | IKAROS family zinc finger 2 (Helios)                                   |
| 7989055 | DYX1C1          | -1.0052565 | down | dyslexia susceptibility 1 candidate 1                                  |
| 8179727 | PSORS1C3 LOC100 | -1.0053632 | down | psoriasis susceptibility 1 candidate 3   similar to psoriasis          |
| 7903908 | CEPT1           | -1.0054888 | down | choline/ethanolamine phosphotransferase 1                              |
| 7990810 | MTHFS ST20      | -1.0056933 | down | 5,10-methenyltetrahydrofolate synthetase (5-formyltetra                |
| 7954208 | PIK3C2G         | -1.0058502 | down | phosphoinositide-3-kinase, class 2, gamma polypeptide                  |
| 7902738 | CLCA4           | -1.0063504 | down | chloride channel, calcium activated, family member 4                   |
| 8082012 | SLC15A2         | -1.006417  | down | solute carrier family 15 (H <sup>+</sup> /peptide transporter), member |
| 7925457 | RGS7            | -1.006498  | down | regulator of G-protein signaling 7                                     |
| 8100362 | LNK1            | -1.0067172 | down | ligand of numb-protein X 1                                             |
| 7947282 | DCDC5           | -1.0067708 | down | doublecortin domain containing 5                                       |

## Supplemental Table 1b

eMSC vs. eEN

|         |                |            |      |                                                          |
|---------|----------------|------------|------|----------------------------------------------------------|
| 8056408 | GALNT3         | -1.0071926 | down | UDP-N-acetyl-alpha-D-galactosamine:polypeptide N-acety   |
| 8147837 | ZFPM2          | -1.0074031 | down | zinc finger protein, multitype 2                         |
| 7981439 | BAG5           | -1.0077465 | down | BCL2-associated athanogene 5                             |
| 8096061 | C4orf22        | -1.0086219 | down | chromosome 4 open reading frame 22                       |
| 7959834 | GLT1D1         | -1.0086994 | down | glycosyltransferase 1 domain containing 1                |
| 8022176 | LAMA1          | -1.0091918 | down | laminin, alpha 1                                         |
| 8101916 | RG9MTD2        | -1.0092257 | down | RNA (guanine-9-) methyltransferase domain containing 2   |
| 7957032 | YEATS4         | -1.0096657 | down | YEATS domain containing 4                                |
| 7943803 | DIXDC1         | -1.0101796 | down | DIX domain containing 1                                  |
| 8054740 | PAX8           | -1.0112317 | down | paired box 8                                             |
| 8131452 | RSPH10B LOC728 | -1.0113273 | down | radial spoke head 10 homolog B (Chlamydomonas)   radia   |
| 7910600 | KIAA1804       | -1.0130869 | down | mixed lineage kinase 4                                   |
| 7997158 | MARVELD3       | -1.0133135 | down | MARVEL domain containing 3                               |
| 8083901 | FNDC3B         | -1.013418  | down | fibronectin type III domain containing 3B                |
| 8154178 | JAK2           | -1.0137166 | down | Janus kinase 2 (a protein tyrosine kinase)               |
| 8100210 | TXK            | -1.0140479 | down |                                                          |
| 8138277 | FLJ14712       | -1.0143671 | down |                                                          |
| 8169492 | AGTR2          | -1.0148033 | down | angiotensin II receptor, type 2                          |
| 7947322 | DCDC1 DCDC5    | -1.014985  | down | doublecortin domain containing 1   doublecortin domain   |
| 8151471 | MRPS28 TPD52   | -1.0158148 | down | mitochondrial ribosomal protein S28   tumor protein D52  |
| 7925342 | ERO1LB         | -1.0161957 | down | ERO1-like beta (S. cerevisiae)                           |
| 8045539 | KYNU           | -1.0164272 | down | kynureninase (L-kynurenine hydrolase)                    |
| 7994058 | SCNN1G         | -1.0171453 | down | sodium channel, nonvoltage-gated 1, gamma                |
| 8097017 | UGT8           | -1.0173956 | down | UDP glycosyltransferase 8 (UDP-galactose ceramide galact |
| 8089596 | WDR52          | -1.0176125 | down | WD repeat domain 52                                      |
| 8126905 | CRISP3         | -1.0183907 | down | cysteine-rich secretory protein 3                        |
| 8094361 | GBA3           | -1.0189601 | down | glucosidase, beta, acid 3 (cytosolic)                    |
| 8039013 | ZNF321         | -1.0191499 | down | zinc finger protein 321                                  |
| 8055361 | YSK4           | -1.0193878 | down | yeast Sps1/Ste20-related kinase 4 (S. cerevisiae)        |
| 7974816 | SLC38A6        | -1.0193928 | down | solute carrier family 38, member 6                       |
| 8076481 | CYB5R3         | -1.0195593 | down | cytochrome b5 reductase 3                                |
| 8149521 | FGL1           | -1.019743  | down | fibrinogen-like 1                                        |
| 8111506 | CAPSL          | -1.0199839 | down | calcyphosine-like                                        |

## Supplemental Table 1b

eMSC vs. eEN

|         |                |            |      |                                                               |
|---------|----------------|------------|------|---------------------------------------------------------------|
| 7991034 | HOMER2         | -1.0201622 | down | homer homolog 2 (Drosophila)                                  |
| 7962212 | PKP2           | -1.0202091 | down | plakophilin 2                                                 |
| 8030931 | ZNF528         | -1.0202857 | down | zinc finger protein 528                                       |
| 8146839 | C8orf34        | -1.0207546 | down | chromosome 8 open reading frame 34                            |
| 8138363 | SOSTDC1        | -1.0209144 | down | sclerostin domain containing 1                                |
| 7923929 | PIGR           | -1.0211791 | down | polymeric immunoglobulin receptor                             |
| 8138009 | RSPH10B LOC728 | -1.0214549 | down | radial spoke head 10 homolog B (Chlamydomonas)   radial       |
| 7916185 | ZCCHC11        | -1.021962  | down | zinc finger, CCHC domain containing 11                        |
| 7985398 | FAM154B        | -1.0222496 | down | family with sequence similarity 154, member B                 |
| 8078971 | ENTPD3         | -1.0227866 | down | ectonucleoside triphosphate diphosphohydrolase 3              |
| 8042993 | CTNNA2         | -1.0232346 | down | catenin (cadherin-associated protein), alpha 2                |
| 7932703 | ACBD5          | -1.0235183 | down | acyl-Coenzyme A binding domain containing 5                   |
| 8093839 | D4S234E        | -1.0235803 | down | DNA segment on chromosome 4 (unique) 234 expressed s          |
| 8147112 | CA13           | -1.0235814 | down | carbonic anhydrase XIII                                       |
| 8080863 | FLJ44379       | -1.02365   | down | similar to S-100 protein, alpha chain                         |
| 8138157 | COL28A1        | -1.0238341 | down | collagen, type XXVIII, alpha 1                                |
| 8174527 | CAPN6          | -1.0242223 | down | calpain 6                                                     |
| 8171418 | PIGA           | -1.0246522 | down | phosphatidylinositol glycan anchor biosynthesis, class A (p   |
| 8056184 | ITGB6          | -1.024661  | down | integrin, beta 6                                              |
| 7979378 | C14orf105      | -1.0250391 | down | chromosome 14 open reading frame 105                          |
| 7965060 | BBS10          | -1.0257766 | down | Bardet-Biedl syndrome 10                                      |
| 8120176 | C6orf141       | -1.0259165 | down | chromosome 6 open reading frame 141                           |
| 7982271 | FAM7A1 GOLGA9  | -1.0261452 | down | family with sequence similarity 7, member A1   golgi auto     |
| 7933760 | CCDC6          | -1.0268899 | down | coiled-coil domain containing 6                               |
| 8058203 | ALS2CR12       | -1.0281159 | down | amyotrophic lateral sclerosis 2 (juvenile) chromosome reg     |
| 8027241 | ZNF253         | -1.028257  | down | zinc finger protein 253                                       |
| 8075728 | MYH9           | -1.0287039 | down | myosin, heavy chain 9, non-muscle                             |
| 8142585 | CADPS2         | -1.0287995 | down | Ca <sup>2+</sup> -dependent activator protein for secretion 2 |
| 8135585 | LOC100128868   | -1.0290847 | down | testin-related protein TRG                                    |
| 7983157 | TMEM62         | -1.0299053 | down | transmembrane protein 62                                      |
| 7900635 | hCG_23177      | -1.0300087 | down | hCG23177                                                      |
| 7916629 | C1orf87        | -1.0300745 | down | chromosome 1 open reading frame 87                            |
| 7909730 | KCNK2          | -1.0301217 | down | potassium channel, subfamily K, member 2                      |



## Supplemental Table 1b

eMSC vs. eEN

|         |                |            |      |                                                              |
|---------|----------------|------------|------|--------------------------------------------------------------|
| 7942791 | LOC100008589 W | -1.0302866 | down | 28S ribosomal RNA   WD repeat domain 88                      |
| 8058552 | IDH1           | -1.0303808 | down | isocitrate dehydrogenase 1 (NADP+), soluble                  |
| 8162388 | OMD            | -1.0305705 | down | osteomodulin                                                 |
| 8127502 | C6orf155       | -1.0315229 | down | chromosome 6 open reading frame 155                          |
| 8081959 | STXBP5L        | -1.0319592 | down | syntaxin binding protein 5-like                              |
| 7918768 | DENND2C        | -1.0326551 | down | DENN/MADD domain containing 2C                               |
| 8048864 | CCL20          | -1.0326688 | down | chemokine (C-C motif) ligand 20                              |
| 8022666 | CHST9          | -1.0336107 | down | carbohydrate (N-acetylgalactosamine 4-0) sulfotransferas     |
| 8162059 | SLC28A3        | -1.0337428 | down | solute carrier family 28 (sodium-coupled nucleoside trans    |
| 8139859 | GUSB           | -1.0348132 | down | glucuronidase, beta                                          |
| 8106403 | F2RL1          | -1.0350233 | down | coagulation factor II (thrombin) receptor-like 1             |
| 8108475 | LOC492311      | -1.03518   | down | similar to bovine IgA regulatory protein                     |
| 7971126 | STOML3         | -1.0352658 | down | stomatin (EPB72)-like 3                                      |
| 8039017 | ZNF816A ZNF321 | -1.0354158 | down | zinc finger protein 816A   zinc finger protein 321           |
| 7902290 | CTH            | -1.0357533 | down | cystathionase (cystathionine gamma-lyase)                    |
| 8011713 | CXCL16         | -1.0358309 | down | chemokine (C-X-C motif) ligand 16                            |
| 8135661 | CFTR           | -1.0358562 | down | cystic fibrosis transmembrane conductance regulator (ATF     |
| 8092295 | CCDC39         | -1.0365213 | down | coiled-coil domain containing 39                             |
| 7903239 | AGL            | -1.0366282 | down | amylo-1, 6-glucosidase, 4-alpha-glucanotransferase (glyco    |
| 8166671 | CXorf22        | -1.0370085 | down | chromosome X open reading frame 22                           |
| 7938880 | HTATIP2        | -1.0370873 | down | HIV-1 Tat interactive protein 2, 30kDa                       |
| 7944667 | SORL1          | -1.0374252 | down | sortilin-related receptor, L(DLR class) A repeats-containing |
| 8081645 | C3orf52        | -1.0375787 | down | chromosome 3 open reading frame 52                           |
| 7975081 | C14orf50       | -1.0385411 | down | chromosome 14 open reading frame 50                          |
| 7920128 | S100A11        | -1.038563  | down | S100 calcium binding protein A11                             |
| 7960529 | SCNN1A         | -1.038713  | down | sodium channel, nonvoltage-gated 1 alpha                     |
| 8166690 | CXorf59        | -1.0394614 | down | chromosome X open reading frame 59                           |
| 8067295 | SLMO2          | -1.0397524 | down | slowmo homolog 2 (Drosophila)                                |
| 8167897 | RRAGB          | -1.0398408 | down | Ras-related GTP binding B                                    |
| 8070467 | TMPRSS2        | -1.0399619 | down | transmembrane protease, serine 2                             |
| 8091678 | VEPH1          | -1.04036   | down | ventricular zone expressed PH domain homolog 1 (zebrafi      |
| 8003060 | HSPC105        | -1.040394  | down | NAD(P) dependent steroid dehydrogenase-like                  |
| 8166243 | REPS2          | -1.0406203 | down | RALBP1 associated Eps domain containing 2                    |

## Supplemental Table 1b

eMSC vs. eEN

|         |           |            |      |                                                              |
|---------|-----------|------------|------|--------------------------------------------------------------|
| 7934898 | ANKRD22   | -1.0406871 | down | ankyrin repeat domain 22                                     |
| 8127425 | LMBRD1    | -1.0421021 | down | LMBR1 domain containing 1                                    |
| 8140140 | CLDN3     | -1.042685  | down | claudin 3                                                    |
| 7965022 | KRR1      | -1.042918  | down |                                                              |
| 8103695 | MFAP3L    | -1.0430493 | down | microfibrillar-associated protein 3-like                     |
| 8089606 | WDR52     | -1.0433816 | down | WD repeat domain 52                                          |
| 7963212 | SLC11A2   | -1.0437596 | down | solute carrier family 11 (proton-coupled divalent metal ion) |
| 8107868 | CDC42SE2  | -1.0438644 | down | CDC42 small effector 2                                       |
| 7957688 | C12orf63  | -1.0442353 | down | chromosome 12 open reading frame 63                          |
| 8146986 | HNF4G     | -1.0448171 | down | hepatocyte nuclear factor 4, gamma                           |
| 8138381 | AGR2      | -1.0450076 | down | anterior gradient homolog 2 ( <i>Xenopus laevis</i> )        |
| 8014591 | HNF1B     | -1.045185  | down | HNF1 homeobox B                                              |
| 7967107 | C12orf27  | -1.0461326 | down | chromosome 12 open reading frame 27                          |
| 8008609 | ANKFN1    | -1.0462235 | down | ankyrin-repeat and fibronectin type III domain containing    |
| 8023843 | FBXO15    | -1.0468174 | down | F-box protein 15                                             |
| 8034084 | AP1M2     | -1.0474333 | down | adaptor-related protein complex 1, mu 2 subunit              |
| 7942489 | DNAJB13   | -1.0475205 | down | DnaJ (Hsp40) related, subfamily B, member 13                 |
| 7932744 | ARMC4     | -1.0477736 | down | armadillo repeat containing 4                                |
| 8048725 | MOGAT1    | -1.0489637 | down | monoacylglycerol O-acyltransferase 1                         |
| 8156321 | SYK       | -1.0495405 | down | spleen tyrosine kinase                                       |
| 8066530 | SPINT3    | -1.0495785 | down | serine peptidase inhibitor, Kunitz type, 3                   |
| 7917019 | C1orf173  | -1.0505872 | down | chromosome 1 open reading frame 173                          |
| 8078330 | RBMS3     | -1.0512072 | down | RNA binding motif, single stranded interacting protein       |
| 8123080 | SYTL3     | -1.0512323 | down | synaptotagmin-like 3                                         |
| 7964579 | CTDSP2    | -1.0513363 | down | CTD (carboxy-terminal domain, RNA polymerase II, polypeptide |
| 8097801 | LOC729830 | -1.0523143 | down | similar to CG3558-PA, isoform A                              |
| 8038655 | KLK4      | -1.0526365 | down | kallikrein-related peptidase 4                               |
| 8094533 | FLJ16686  | -1.0527093 | down |                                                              |
| 8128592 | ATG5      | -1.05272   | down |                                                              |
| 8004889 | WDR16     | -1.0541935 | down | WD repeat domain 16                                          |
| 8152867 | DDEF1     | -1.0541986 | down | development and differentiation enhancing factor 1           |
| 8162586 | SLC35D2   | -1.0545307 | down | solute carrier family 35, member D2                          |
| 8122561 | C6orf103  | -1.0547687 | down | chromosome 6 open reading frame 103                          |

## Supplemental Table 1b

eMSC vs. eEN

|         |                 |            |      |                                                           |
|---------|-----------------|------------|------|-----------------------------------------------------------|
| 8021376 | NEDD4L          | -1.0551963 | down | neural precursor cell expressed, developmentally down-re  |
| 8035095 | CYP4F11         | -1.0552695 | down | cytochrome P450, family 4, subfamily F, polypeptide 11    |
| 7909455 | TRAF3IP3 LOC100 | -1.0560024 | down | TRAF3 interacting protein 3   hypothetical protein LOC100 |
| 8097670 | MMAA            | -1.0564631 | down | methylmalonic aciduria (cobalamin deficiency) cblA type   |
| 8095736 | AREG LOC727738  | -1.0568016 | down | amphiregulin (schwannoma-derived growth factor)   simil   |
| 8175574 | SLITRK4         | -1.058268  | down | SLIT and NTRK-like family, member 4                       |
| 8100768 | UGT2B11 UGT2B1  | -1.0583085 | down | UDP glucuronosyltransferase 2 family, polypeptide B11   U |
| 8111019 | DNAH5           | -1.05945   | down | dynein, axonemal, heavy chain 5                           |
| 7947274 | MPPED2          | -1.0594606 | down | metallophosphoesterase domain containing 2                |
| 7984843 | ARID3B          | -1.0597447 | down | AT rich interactive domain 3B (BRIGHT-like)               |
| 7993638 | TMC5            | -1.0599616 | down | transmembrane channel-like 5                              |
| 8081055 | CHMP2B          | -1.0605918 | down | chromatin modifying protein 2B                            |
| 7988970 | KIAA1370        | -1.0607082 | down |                                                           |
| 8098195 | SC4MOL          | -1.0611578 | down | sterol-C4-methyl oxidase-like                             |
| 8040672 | C2orf39         | -1.0615069 | down | chromosome 2 open reading frame 39                        |
| 7936201 | C10orf79        | -1.0619909 | down | chromosome 10 open reading frame 79                       |
| 7955663 | TENC1           | -1.0620785 | down | tensin like C1 domain containing phosphatase (tensin 2)   |
| 8129783 | MAP7            | -1.0620998 | down | microtubule-associated protein 7                          |
| 8089519 | BTLA            | -1.0628619 | down | B and T lymphocyte associated                             |
| 8138258 | FLJ14712        | -1.063141  | down |                                                           |
| 7917576 | GBP5            | -1.0632586 | down | guanylate binding protein 5                               |
| 7913787 | C1orf201        | -1.0639281 | down | chromosome 1 open reading frame 201                       |
| 8108912 | SH3RF2          | -1.0639579 | down | SH3 domain containing ring finger 2                       |
| 7918694 | BCL2L15         | -1.0643474 | down | BCL2-like 15                                              |
| 8169603 | LONRF3          | -1.0645753 | down | LON peptidase N-terminal domain and ring finger 3         |
| 7973108 | LOC643332       | -1.0648488 | down | similar to Nonsecretory ribonuclease precursor (Ribonucle |
| 8162570 | HSD17B3         | -1.0654755 | down | hydroxysteroid (17-beta) dehydrogenase 3                  |
| 8142497 | CTTNBP2         | -1.0659869 | down | cortactin binding protein 2                               |
| 7983145 | STARD9          | -1.066127  | down | StAR-related lipid transfer (START) domain containing 9   |
| 7941401 | OVOL1           | -1.0673544 | down | ovo-like 1(Drosophila)                                    |
| 8089988 | CCDC58          | -1.0673804 | down | coiled-coil domain containing 58                          |
| 7950042 | SHANK2          | -1.0674543 | down | SH3 and multiple ankyrin repeat domains 2                 |
| 7957433 | LRRIQ1          | -1.0676215 | down | leucine-rich repeats and IQ motif containing 1            |

## Supplemental Table 1b

eMSC vs. eEN

|         |                |            |      |                                                                |
|---------|----------------|------------|------|----------------------------------------------------------------|
| 8043937 | C2orf29        | -1.0683205 | down | chromosome 2 open reading frame 29                             |
| 8168580 | APOOL          | -1.0683863 | down | apolipoprotein O-like                                          |
| 8099467 | FGFBP1         | -1.0684354 | down | fibroblast growth factor binding protein 1                     |
| 8139680 | COBL           | -1.06852   | down | cordon-bleu homolog (mouse)                                    |
| 8134351 | PPP1R9A        | -1.0693569 | down | protein phosphatase 1, regulatory (inhibitor) subunit 9A       |
| 8091600 | PLCH1          | -1.0696077 | down | phospholipase C, eta 1                                         |
| 8054308 | TBC1D8         | -1.0696101 | down | TBC1 domain family, member 8 (with GRAM domain)                |
| 8179719 | POU5F1 POU5F1F | -1.0698702 | down | POU class 5 homeobox 1   POU class 5 homeobox 1 pseud          |
| 8022473 | ESCO1          | -1.069887  | down | establishment of cohesion 1 homolog 1 ( <i>S. cerevisiae</i> ) |
| 7969861 | ITGBL1         | -1.0700922 | down | integrin, beta-like 1 (with EGF-like repeat domains)           |
| 8027312 | ZNF429         | -1.0701629 | down | zinc finger protein 429                                        |
| 7919340 | GJA5           | -1.0704689 | down | gap junction protein, alpha 5, 40kDa                           |
| 7903407 | AMY2B          | -1.0709579 | down | amylase, alpha 2B (pancreatic)                                 |
| 7943740 | FLJ46266       | -1.0717885 | down |                                                                |
| 8109629 | FABP6          | -1.0720123 | down | fatty acid binding protein 6, ileal (gastrotropin)             |
| 7920642 | MUC1           | -1.0732265 | down | mucin 1, cell surface associated                               |
| 7902660 | WDR63          | -1.0733361 | down | WD repeat domain 63                                            |
| 7960865 | SLC2A3         | -1.0734602 | down | solute carrier family 2 (facilitated glucose transporter), me  |
| 8094759 | NSUN7          | -1.0735548 | down | NOL1/NOP2/Sun domain family, member 7                          |
| 8168976 | GPRASP2        | -1.0735708 | down | G protein-coupled receptor associated sorting protein 2        |
| 8044080 | SLC9A2         | -1.0740702 | down | solute carrier family 9 (sodium/hydrogen exchanger), mer       |
| 8108251 | NPY6R          | -1.074474  | down | neuropeptide Y receptor Y6 (pseudogene)                        |
| 8066536 | WFDC6 SPINLW1  | -1.0746136 | down | WAP four-disulfide core domain 6   serine peptidase inhibi     |
| 8109490 | SGCD           | -1.0754365 | down | sarcoglycan, delta (35kDa dystrophin-associated glycoprot      |
| 7936346 | ZDHHC6         | -1.0758381 | down | zinc finger, DHHC-type containing 6                            |
| 8112053 | CDC20B         | -1.0764923 | down | cell division cycle 20 homolog B ( <i>S. cerevisiae</i> )      |
| 8124889 | POU5F1 POU5F1F | -1.0765256 | down | POU class 5 homeobox 1   POU class 5 homeobox 1 pseud          |
| 8004957 | DNAH9          | -1.077848  | down | dynein, axonemal, heavy chain 9                                |
| 7972021 | TBC1D4         | -1.0781118 | down | TBC1 domain family, member 4                                   |
| 8045816 | GPD2           | -1.0789299 | down | glycerol-3-phosphate dehydrogenase 2 (mitochondrial)           |
| 8167287 | PORCN          | -1.0790192 | down | porcupine homolog ( <i>Drosophila</i> )                        |
| 7962183 | AK3L1 AK3L2    | -1.0801783 | down | adenylate kinase 3-like 1   adenylate kinase 3-like 2          |
| 8075709 | APOL4          | -1.0804948 | down | apolipoprotein L, 4                                            |

## Supplemental Table 1b

eMSC vs. eEN

|         |           |            |      |                                                          |
|---------|-----------|------------|------|----------------------------------------------------------|
| 7959681 | DNAH10    | -1.0809081 | down | dynein, axonemal, heavy chain 10                         |
| 7960919 | MFAP5     | -1.081573  | down | microfibrillar associated protein 5                      |
| 7985268 | FAH       | -1.0815984 | down | fumarylacetoacetate hydrolase (fumarylacetoacetase)      |
| 8085164 | SRGAP3    | -1.08214   | down | SLIT-ROBO Rho GTPase activating protein 3                |
| 8030914 | ZNF610    | -1.0823863 | down | zinc finger protein 610                                  |
| 8014891 | IKZF3     | -1.0827227 | down | IKAROS family zinc finger 3 (Aiolos)                     |
| 8009685 | SLC9A3R1  | -1.0831815 | down | solute carrier family 9 (sodium/hydrogen exchanger), mer |
| 7990818 | BCL2A1    | -1.0834712 | down | BCL2-related protein A1                                  |
| 8102249 | AGXT2L1   | -1.0841334 | down | alanine-glyoxylate aminotransferase 2-like 1             |
| 8077270 | CHL1      | -1.0841488 | down | cell adhesion molecule with homology to L1CAM (close hc  |
| 8020384 | KIAA1772  | -1.0843941 | down |                                                          |
| 7903281 | SLC35A3   | -1.0849555 | down | solute carrier family 35 (UDP-N-acetylglucosamine (UDP-C |
| 7973918 | C14orf24  | -1.0853449 | down | chromosome 14 open reading frame 24                      |
| 7953409 | PTMS      | -1.0857309 | down | parathymosin                                             |
| 8113796 | FLJ44606  | -1.0859864 | down | hypothetical gene supported by AK126569                  |
| 7957514 | PLEKHG7   | -1.0861106 | down | pleckstrin homology domain containing, family G (with Rh |
| 8097903 | TLR2      | -1.087842  | down | toll-like receptor 2                                     |
| 8099841 | TLR6      | -1.0881305 | down | toll-like receptor 6                                     |
| 8019831 | CLUL1     | -1.0881389 | down | clusterin-like 1 (retinal)                               |
| 7930593 | C10orf81  | -1.0896041 | down | chromosome 10 open reading frame 81                      |
| 7935180 | PDLIM1    | -1.0901597 | down | PDZ and LIM domain 1 (elfin)                             |
| 8039692 | LOC730051 | -1.0910797 | down | similar to hCG2044798                                    |
| 8100994 | CXCL2     | -1.0917889 | down | chemokine (C-X-C motif) ligand 2                         |
| 8088299 | DNHD2     | -1.0920708 | down | dynein heavy chain domain 2                              |
| 8162502 | FBP1      | -1.0932063 | down | fructose-1,6-bisphosphatase 1                            |
| 8096682 | FLJ20184  | -1.0932066 | down |                                                          |
| 7915425 | ZMYND12   | -1.0939238 | down | zinc finger, MYND-type containing 12                     |
| 8016414 | SKAP1     | -1.0949599 | down | src kinase associated phosphoprotein 1                   |
| 7953518 | LOC171220 | -1.0953797 | down | destrin-2 pseudogene                                     |
| 7979131 | GNG2      | -1.0971301 | down | guanine nucleotide binding protein (G protein), gamma 2  |
| 7971335 | CCDC122   | -1.0972884 | down | coiled-coil domain containing 122                        |
| 8048717 | SGPP2     | -1.0981429 | down | sphingosine-1-phosphate phosphatase 2                    |
| 8027748 | FXYD3     | -1.0993372 | down | FXYD domain containing ion transport regulator 3         |

Supplemental Table 1b  
eMSC vs. eEN

|         |                 |            |      |                                                               |
|---------|-----------------|------------|------|---------------------------------------------------------------|
| 7947156 | MUC15           | -1.0994629 | down | mucin 15, cell surface associated                             |
| 7905677 | CREB3L4         | -1.0994991 | down | cAMP responsive element binding protein 3-like 4              |
| 8055496 | LRP1B           | -1.0996028 | down | low density lipoprotein-related protein 1B (deleted in tum    |
| 7932390 | TRDMT1          | -1.1022617 | down | tRNA aspartic acid methyltransferase 1                        |
| 8106689 | CKMT2           | -1.1028247 | down | creatine kinase, mitochondrial 2 (sarcomeric)                 |
| 7916584 | TACSTD2         | -1.1028414 | down | tumor-associated calcium signal transducer 2                  |
| 8161270 | ANKRD18A        | -1.1030835 | down | ankyrin repeat domain 18A                                     |
| 8078014 | SLC6A6          | -1.1033875 | down | solute carrier family 6 (neurotransmitter transporter, taur   |
| 8104930 | SLC1A3          | -1.1043098 | down | solute carrier family 1 (glial high affinity glutamate transp |
| 7970441 | GJB2            | -1.1044713 | down | gap junction protein, beta 2, 26kDa                           |
| 7907297 | FMO4            | -1.1053159 | down | flavin containing monooxygenase 4                             |
| 8178470 | POU5F1 POU5F1F  | -1.1053237 | down | POU class 5 homeobox 1   POU class 5 homeobox 1 pseuc         |
| 8081710 | SIDT1           | -1.1056983 | down | SID1 transmembrane family, member 1                           |
| 7931930 | PRKCQ           | -1.1063418 | down | protein kinase C, theta                                       |
| 8038967 | ZNF83           | -1.1067264 | down | zinc finger protein 83                                        |
| 8143221 | ATP6V0A4        | -1.1068206 | down | ATPase, H <sup>+</sup> transporting, lysosomal V0 subunit a4  |
| 8128795 | C6orf199        | -1.1074275 | down | chromosome 6 open reading frame 199                           |
| 8164013 | STRBP           | -1.1081069 | down | spermatid perinuclear RNA binding protein                     |
| 8057821 | DNAH7           | -1.1081715 | down | dynein, axonemal, heavy chain 7                               |
| 8017057 | C17orf47        | -1.1082603 | down | chromosome 17 open reading frame 47                           |
| 8015900 | TMEM101         | -1.1085336 | down | transmembrane protein 101                                     |
| 8157216 | UGCG            | -1.1088537 | down | UDP-glucose ceramide glucosyltransferase                      |
| 8095021 | SPATA18         | -1.1101149 | down | spermatogenesis associated 18 homolog (rat)                   |
| 8128894 | REV3L           | -1.1103929 | down | REV3-like, catalytic subunit of DNA polymerase zeta (yeas     |
| 7985662 | PDE8A           | -1.1105564 | down | phosphodiesterase 8A                                          |
| 8133062 | ZNF273          | -1.1113939 | down | zinc finger protein 273                                       |
| 7956120 | ERBB3           | -1.1116753 | down | v-erb-b2 erythroblastic leukemia viral oncogene homolog       |
| 7922243 | C1orf156        | -1.1126784 | down | chromosome 1 open reading frame 156                           |
| 7933437 | PTPN20B PTPN20  | -1.1132808 | down | protein tyrosine phosphatase, non-receptor type 20B   pr      |
| 7990714 | CHRNA3          | -1.1138108 | down | cholinergic receptor, nicotinic, alpha 3                      |
| 8155487 | KGFLP1 KGFLP2 F | -1.1142774 | down | keratinocyte growth factor-like protein 1   keratinocyte gi   |
| 8039687 | ZNF552          | -1.1153382 | down | zinc finger protein 552                                       |
| 8098328 | GALNT7          | -1.1156982 | down | UDP-N-acetyl-alpha-D-galactosamine:polypeptide N-acety        |

## Supplemental Table 1b

eMSC vs. eEN

|         |                      |            |      |                                                                                       |
|---------|----------------------|------------|------|---------------------------------------------------------------------------------------|
| 8064808 | SLC23A2              | -1.1186032 | down | solute carrier family 23 (nucleobase transporters), member 2                          |
| 8015590 | STAT5B               | -1.1192071 | down | signal transducer and activator of transcription 5B                                   |
| 7963328 | FIGNL2               | -1.1203098 | down | figidetin-like 2                                                                      |
| 8174201 | BEX1                 | -1.1208389 | down | brain expressed, X-linked 1                                                           |
| 8162117 | GOLM1                | -1.1214739 | down | golgi membrane protein 1                                                              |
| 7926622 | SPAG6                | -1.1224886 | down | sperm associated antigen 6                                                            |
| 7978407 | PRKD1                | -1.1225468 | down | protein kinase D1                                                                     |
| 7976578 | AK7                  | -1.1226099 | down | adenylate kinase 7                                                                    |
| 8070584 | TMPRSS3              | -1.1228299 | down | transmembrane protease, serine 3                                                      |
| 7979671 | MAX                  | -1.1233404 | down | MYC associated factor X                                                               |
| 8161455 | KGFLP2 KGFLP1 F      | -1.1235567 | down | keratinocyte growth factor-like protein 2   keratinocyte growth factor-like protein 1 |
| 7925130 | TARBP1               | -1.1237506 | down | TAR (HIV-1) RNA binding protein 1                                                     |
| 8147970 | EBAG9                | -1.1245941 | down | estrogen receptor binding site associated, antigen, 9                                 |
| 8161423 | KGFLP2 KGFLP1 F      | -1.1248156 | down | keratinocyte growth factor-like protein 2   keratinocyte growth factor-like protein 1 |
| 8039010 | ZNF765 LOC388593     | -1.1249925 | down | zinc finger protein 765   similar to hCG1778601                                       |
| 8008040 | LRRC46               | -1.1266896 | down | leucine rich repeat containing 46                                                     |
| 8002283 | TMED6                | -1.1275047 | down | transmembrane emp24 protein transport domain containing 6                             |
| 8021453 | SEC11C               | -1.1276399 | down | SEC11 homolog C ( <i>S. cerevisiae</i> )                                              |
| 8046078 | B3GALT1              | -1.1279249 | down | UDP-Gal:betaGlcNAc beta 1,3-galactosyltransferase, polypeptide chain 1                |
| 7901804 | INADL                | -1.1290295 | down | InaD-like ( <i>Drosophila</i> )                                                       |
| 7971757 | NEK5                 | -1.1296436 | down | NIMA (never in mitosis gene a)-related kinase 5                                       |
| 8102877 | CLGN                 | -1.1317992 | down | calmegin                                                                              |
| 8059350 | AP1S3                | -1.1326549 | down | adaptor-related protein complex 1, sigma 3 subunit                                    |
| 8097920 | LRAT                 | -1.1334592 | down | lecithin retinol acyltransferase (phosphatidylcholine--retinol acyltransferase)       |
| 8136936 | CTAGE6 CTAGE4 CTAGE5 | -1.1339768 | down | CTAGE family, member 6   CTAGE family, member 4   similar to CTAGE family, member 5   |
| 7927082 | HSD17B7P2            | -1.1348433 | down | hydroxysteroid (17-beta) dehydrogenase 7 pseudogene 2                                 |
| 8139488 | IGFBP3               | -1.1348766 | down | insulin-like growth factor binding protein 3                                          |
| 8163437 | SLC46A2              | -1.1355519 | down | solute carrier family 46, member 2                                                    |
| 8130505 | EZR                  | -1.1370822 | down | ezrin                                                                                 |
| 8154823 | ANKRD18B             | -1.1390915 | down | ankyrin repeat domain 18B                                                             |
| 7952927 | B4GALNT3             | -1.1391395 | down | beta-1,4-N-acetyl-galactosaminyl transferase 3                                        |
| 8095819 | STBD1 LOC100129259   | -1.1406808 | down | starch binding domain 1   similar to genethonin 1                                     |
| 8126710 | SUPT3H               | -1.1420187 | down | suppressor of Ty 3 homolog ( <i>S. cerevisiae</i> )                                   |

Supplemental Table 1b  
eMSC vs. eEN

|         |                 |            |      |                                                                      |
|---------|-----------------|------------|------|----------------------------------------------------------------------|
| 8126729 | CLIC5 LOC100131 | -1.1426694 | down | chloride intracellular channel 5   similar to chloride intrac        |
| 8140534 | SEMA3C          | -1.143199  | down | sema domain, immunoglobulin domain (Ig), short basic dc              |
| 8134122 | AKAP9           | -1.143359  | down | A kinase (PRKA) anchor protein (yotiao) 9                            |
| 7950654 | ALG8            | -1.143398  | down | asparagine-linked glycosylation 8 homolog ( <i>S. cerevisiae</i> , a |
| 8043043 | DNHL1 LOC20038  | -1.1445063 | down | dynein heavy chain-like 1   similar to Dynein heavy chain a          |
| 8021966 | ENOSF1          | -1.1476862 | down | enolase superfamily member 1                                         |
| 8005289 | LRRC48          | -1.1493567 | down | leucine rich repeat containing 48                                    |
| 7904211 | VANGL1          | -1.1494157 | down | vang-like 1 (van gogh, <i>Drosophila</i> )                           |
| 7945204 | ST14            | -1.1496142 | down | suppression of tumorigenicity 14 (colon carcinoma)                   |
| 8045882 | DAPL1           | -1.1511014 | down | death associated protein-like 1                                      |
| 8096617 | BANK1           | -1.1512785 | down | B-cell scaffold protein with ankyrin repeats 1                       |
| 7968637 | CCNA1           | -1.1520454 | down | cyclin A1                                                            |
| 8155930 | GCNT1           | -1.1524868 | down | glucosaminyl (N-acetyl) transferase 1, core 2 (beta-1,6-N-a          |
| 8169350 | LOC100134364    | -1.1528285 | down |                                                                      |
| 7996677 | NUTF2           | -1.1531898 | down | nuclear transport factor 2                                           |
| 8025255 | STXBP2          | -1.1568614 | down | syntaxin binding protein 2                                           |
| 7902965 | BTBD8           | -1.1574725 | down | BTB (POZ) domain containing 8                                        |
| 8143601 | CTAGE6 CTAGE4   | -1.1578242 | down | CTAGE family, member 6   CTAGE family, member 4   sim                |
| 7961829 | BCAT1           | -1.1579108 | down | branched chain aminotransferase 1, cytosolic                         |
| 7958749 | SH2B3           | -1.159087  | down | SH2B adaptor protein 3                                               |
| 8090091 | PTPLB           | -1.159115  | down | protein tyrosine phosphatase-like (proline instead of catal          |
| 7997556 | LRRC50          | -1.1592221 | down | leucine rich repeat containing 50                                    |
| 8059576 | PID1            | -1.1614156 | down | phosphotyrosine interaction domain containing 1                      |
| 8031825 | ZNF587          | -1.1621764 | down | zinc finger protein 587                                              |
| 8066786 | ZMYND8          | -1.1622788 | down | zinc finger, MYND-type containing 8                                  |
| 8146225 | C8orf40         | -1.1624982 | down | chromosome 8 open reading frame 40                                   |
| 8041048 | FOSL2           | -1.1644267 | down | FOS-like antigen 2                                                   |
| 8099834 | TLR1            | -1.1658148 | down | toll-like receptor 1                                                 |
| 8123678 | C6orf145        | -1.1676378 | down | chromosome 6 open reading frame 145                                  |
| 8030908 | ZNF480          | -1.1676867 | down | zinc finger protein 480                                              |
| 8088526 | THOC7           | -1.1688278 | down | THO complex 7 homolog ( <i>Drosophila</i> )                          |
| 7967456 | RILPL2          | -1.1711466 | down | Rab interacting lysosomal protein-like 2                             |
| 8116402 | MAPK9           | -1.1713655 | down | mitogen-activated protein kinase 9                                   |



## Supplemental Table 1b

eMSC vs. eEN

|         |               |            |      |                                                                                             |
|---------|---------------|------------|------|---------------------------------------------------------------------------------------------|
| 7950641 | KCTD14        | -1.1718276 | down | potassium channel tetramerisation domain containing 14                                      |
| 7926531 | ARL5B         | -1.1721427 | down | ADP-ribosylation factor-like 5B                                                             |
| 8034393 | ZNF443        | -1.1724031 | down | zinc finger protein 443                                                                     |
| 8167603 | CLCN5         | -1.1739932 | down | chloride channel 5 (nephrolithiasis 2, X-linked, Dent disease)                              |
| 8085852 | NGLY1         | -1.1740623 | down | N-glycanase 1                                                                               |
| 8094719 | N4BP2         | -1.1741619 | down | NEDD4 binding protein 2                                                                     |
| 7932637 | ANKRD26       | -1.1753364 | down | ankyrin repeat domain 26                                                                    |
| 8018774 | ST6GALNAC1    | -1.1760254 | down | ST6 (alpha-N-acetyl-neuraminyl-2,3-beta-galactosyl-1,3)-N-acetylglucosaminyl transferase 1  |
| 8146115 | C8orf4        | -1.1761435 | down | chromosome 8 open reading frame 4                                                           |
| 8131179 | TTYH3         | -1.1766561 | down | tweety homolog 3 (Drosophila)                                                               |
| 8012450 | SLC25A35      | -1.1770064 | down | solute carrier family 25, member 35                                                         |
| 7980146 | NPC2          | -1.1791391 | down | Niemann-Pick disease, type C2                                                               |
| 7968872 | DNAJC15       | -1.1795375 | down | DnaJ (Hsp40) homolog, subfamily C, member 15                                                |
| 7942964 | TMEM135       | -1.1797376 | down | transmembrane protein 135                                                                   |
| 7968800 | DGKH          | -1.179847  | down | diacylglycerol kinase, eta                                                                  |
| 8120061 | ENPP4         | -1.1805133 | down | ectonucleotide pyrophosphatase/phosphodiesterase 4 (platelet)                               |
| 8113491 | STARD4        | -1.1812027 | down | StAR-related lipid transfer (START) domain containing 4                                     |
| 7926545 | PLXDC2        | -1.1830933 | down | plexin domain containing 2                                                                  |
| 8049317 | DGKD          | -1.1854929 | down | diacylglycerol kinase, delta 130kDa                                                         |
| 7945573 | POLR2L        | -1.1861126 | down | polymerase (RNA) II (DNA directed) polypeptide L, 7.6kDa                                    |
| 8074237 | CECR1         | -1.1863614 | down | cat eye syndrome chromosome region, candidate 1                                             |
| 8060758 | PRNP          | -1.1869422 | down | prion protein (p27-30) (Creutzfeldt-Jakob disease, Gerstmann-Sträussler-Scheutler syndrome) |
| 8066431 | ADA           | -1.1870186 | down | adenosine deaminase                                                                         |
| 8155169 | RECK          | -1.1870914 | down | reversion-inducing-cysteine-rich protein with kazal motifs                                  |
| 8041763 | PRKCE         | -1.1872807 | down | protein kinase C, epsilon                                                                   |
| 8153021 | ST3GAL1       | -1.1882107 | down | ST3 beta-galactoside alpha-2,3-sialyltransferase 1                                          |
| 7993898 | VWA3A         | -1.188434  | down | von Willebrand factor A domain containing 3A                                                |
| 7906564 | PEA15         | -1.1893588 | down | phosphoprotein enriched in astrocytes 15                                                    |
| 7918134 | AMY1A AMY1B A | -1.1900933 | down | amylase, alpha 1A (salivary)   amylase, alpha 1B (salivary)                                 |
| 8028908 | ITPKC         | -1.1901349 | down | inositol 1,4,5-trisphosphate 3-kinase C                                                     |
| 7904254 | ATP1A1        | -1.1904469 | down | ATPase, Na <sup>+</sup> /K <sup>+</sup> transporting, alpha 1 polypeptide                   |
| 7987369 | ATPBD4        | -1.1910547 | down | ATP binding domain 4                                                                        |
| 8134407 | DLX6          | -1.1919495 | down | distal-less homeobox 6                                                                      |

## Supplemental Table 1b

eMSC vs. eEN

|         |                 |            |      |                                                             |
|---------|-----------------|------------|------|-------------------------------------------------------------|
| 7903425 | AMY1A AMY1B A   | -1.1935611 | down | amylase, alpha 1A (salivary)   amylase, alpha 1B (salivary) |
| 7903440 | AMY1A AMY1B A   | -1.1940725 | down | amylase, alpha 1A (salivary)   amylase, alpha 1B (salivary) |
| 7970448 | GJB6            | -1.1960034 | down | gap junction protein, beta 6, 30kDa                         |
| 8050160 | MBOAT2          | -1.1963273 | down | membrane bound O-acyltransferase domain containing 2        |
| 8148059 | DEPDC6          | -1.1983819 | down | DEP domain containing 6                                     |
| 8066117 | SAMHD1          | -1.2001401 | down | SAM domain and HD domain 1                                  |
| 7933139 | ZNF33B          | -1.2006835 | down | zinc finger protein 33B                                     |
| 8039025 | ZNF702          | -1.2062731 | down | zinc finger protein 702                                     |
| 8123884 | C6orf52         | -1.2101445 | down | chromosome 6 open reading frame 52                          |
| 8073645 | SAMM50 LOC100   | -1.2112434 | down | sorting and assembly machinery component 50 homolog         |
| 7979725 | PIGH            | -1.2129021 | down | phosphatidylinositol glycan anchor biosynthesis, class H    |
| 7899615 | SERINC2 KIAA074 | -1.2155529 | down | serine incorporator 2   KIAA0746 protein                    |
| 7972055 | KCTD12          | -1.2164353 | down | potassium channel tetramerisation domain containing 12      |
| 8006531 | SLFN5           | -1.2167114 | down | schlafen family member 5                                    |
| 8122317 | HEBP2           | -1.2186364 | down | heme binding protein 2                                      |
| 7986411 | MEF2A           | -1.2189821 | down | myocyte enhancer factor 2A                                  |
| 8103834 | AGA             | -1.2190759 | down | aspartylglucosaminidase                                     |
| 8072678 | HMOX1           | -1.2191138 | down | heme oxygenase (decycling) 1                                |
| 8171901 | MAP3K7IP3       | -1.2193321 | down | mitogen-activated protein kinase kinase kinase 7 interacti  |
| 8092177 | AADAACL1        | -1.2194414 | down | arylacetamide deacetylase-like 1                            |
| 8023855 | CYB5A           | -1.223933  | down | cytochrome b5 type A (microsomal)                           |
| 8019954 | FLJ35776        | -1.2247967 | down | hypothetical protein LOC649446                              |
| 7934178 | PCBD1           | -1.2248462 | down | pterin-4 alpha-carbinolamine dehydratase/dimerization c     |
| 8121886 | HINT3           | -1.2249639 | down | histidine triad nucleotide binding protein 3                |
| 7919780 | GOLPH3L         | -1.2266594 | down | golgi phosphoprotein 3-like                                 |
| 8096425 | MGC48628        | -1.2284222 | down | similar to KIAA1680 protein                                 |
| 8151952 | NPAL2           | -1.2288624 | down | NIPA-like domain containing 2                               |
| 8094520 | PCDH7           | -1.2299801 | down | protocadherin 7                                             |
| 7932453 | NEBL            | -1.231977  | down | nebulin                                                     |
| 7954460 | LYRM5           | -1.2324158 | down | LYR motif containing 5                                      |
| 7932326 | CUBN            | -1.2324632 | down | cubilin (intrinsic factor-cobalamin receptor)               |
| 8046895 | KIAA1946        | -1.2327353 | down |                                                             |
| 8162019 | KIF27 LOC389765 | -1.2329789 | down | kinesin family member 27   similar to KIF27C                |

## Supplemental Table 1b

eMSC vs. eEN

|         |                        |            |      |                                                                                    |
|---------|------------------------|------------|------|------------------------------------------------------------------------------------|
| 7938816 | ZDHC13                 | -1.2338829 | down | zinc finger, DHHC-type containing 13                                               |
| 8014706 | PCGF2                  | -1.2352744 | down | polycomb group ring finger 2                                                       |
| 8158317 | SPTAN1                 | -1.2361662 | down | spectrin, alpha, non-erythrocytic 1 (alpha-fodrin)                                 |
| 7957673 | C12orf55   FLJ3447     | -1.2378263 | down | chromosome 12 open reading frame 55   hypothetical protein                         |
| 7979732 | VTI1B                  | -1.237969  | down | vesicle transport through interaction with t-SNAREs homolog                        |
| 8106252 | HEXB                   | -1.2382563 | down | hexosaminidase B (beta polypeptide)                                                |
| 7983527 | SEMA6D                 | -1.2390145 | down | sema domain, transmembrane domain (TM), and cytoplasmic domain                     |
| 7959123 | PRKAB1                 | -1.2391624 | down | protein kinase, AMP-activated, beta 1 non-catalytic subunit                        |
| 8060949 | ANKRD5                 | -1.2393012 | down | ankyrin repeat domain 5                                                            |
| 8063351 | SLC9A8                 | -1.2400634 | down | solute carrier family 9 (sodium/hydrogen exchanger), member 8                      |
| 8057719 | HIBCH                  | -1.2423652 | down | 3-hydroxyisobutyryl-Coenzyme A hydrolase                                           |
| 8037835 | SLC1A5                 | -1.242371  | down | solute carrier family 1 (neutral amino acid transporter), member 5                 |
| 7979906 | C14orf112              | -1.2426038 | down | chromosome 14 open reading frame 112                                               |
| 7908694 | NAV1                   | -1.2428226 | down | neuron navigator 1                                                                 |
| 8014115 | MYO1D                  | -1.2432584 | down | myosin ID                                                                          |
| 8173812 | NSBP1                  | -1.2466629 | down | nucleosomal binding protein 1                                                      |
| 7899153 | SH3BGL3                | -1.2470957 | down | SH3 domain binding glutamic acid-rich protein like 3                               |
| 7963092 | FMNL3                  | -1.2493135 | down | formin-like 3                                                                      |
| 7971191 | SUGT1L1   LOC100506150 | -1.2533717 | down | SGT1, suppressor of G2 allele of SKP1 like 1 (S. cerevisiae)                       |
| 7970455 | CRYL1                  | -1.2546651 | down | crystallin, lambda 1                                                               |
| 8175269 | FAM122B                | -1.2550098 | down | family with sequence similarity 122B                                               |
| 7993310 | MKL2                   | -1.2562299 | down | MKL/myocardin-like 2                                                               |
| 8123695 | PECI                   | -1.2566954 | down | peroxisomal D3,D2-enoyl-CoA isomerase                                              |
| 8052940 | PAIP2B                 | -1.2569109 | down | poly(A) binding protein interacting protein 2B                                     |
| 8095697 | CXCL1                  | -1.2570984 | down | chemokine (C-X-C motif) ligand 1 (melanoma growth stimulating activity 1)          |
| 7934570 | KCNMA1                 | -1.2574916 | down | potassium large conductance calcium-activated channel, subunit 1                   |
| 7975268 | ARG2                   | -1.2581582 | down | arginase, type II                                                                  |
| 8034151 | DOCK6                  | -1.2596086 | down | dedicator of cytokinesis 6                                                         |
| 7913694 | FUCA1                  | -1.26071   | down | fucosidase, alpha-L-1, tissue                                                      |
| 8012918 | CDRT4   FAM18B2        | -1.2611684 | down | chromosome duplications region transcript 4   family with sequence similarity 18B2 |
| 8021301 | RAB27B                 | -1.2626659 | down | Rab GTPase 27B                                                                     |
| 8034390 | ZNF799                 | -1.2645406 | down | zinc finger protein 799                                                            |
| 8175023 | ZDHC9                  | -1.264762  | down | zinc finger, DHHC-type containing 9                                                |

## Supplemental Table 1b

eMSC vs. eEN

|         |                |            |      |                                                              |
|---------|----------------|------------|------|--------------------------------------------------------------|
| 8078380 | LOC344787      | -1.2652478 | down | similar to zinc finger protein 813                           |
| 8138857 | C7orf24        | -1.2660011 | down | chromosome 7 open reading frame 24                           |
| 8035842 | ZNF91          | -1.266098  | down | zinc finger protein 91                                       |
| 7974090 | CTAGE5         | -1.2677878 | down | CTAGE family, member 5                                       |
| 8143766 | ARP11          | -1.2684455 | down | actin-related Arp11                                          |
| 7980309 | C14orf1        | -1.268661  | down | chromosome 14 open reading frame 1                           |
| 7903414 | AMY2A AMY1A A  | -1.2688522 | down | amylase, alpha 2A (pancreatic)   amylase, alpha 1A (saliva   |
| 7969114 | SETDB2         | -1.2691721 | down | SET domain, bifurcated 2                                     |
| 7932023 | USP6NL         | -1.2719635 | down | USP6 N-terminal like                                         |
| 7909877 | MOSC1          | -1.2759672 | down | MOCO sulphurase C-terminal domain containing 1               |
| 8100231 | TEC            | -1.2766205 | down | tec protein tyrosine kinase                                  |
| 7934334 | TTC18          | -1.2793547 | down | tetratricopeptide repeat domain 18                           |
| 8177628 | CCDC125        | -1.2800319 | down | coiled-coil domain containing 125                            |
| 8066905 | ZNFX1          | -1.2801881 | down | zinc finger, NFX1-type containing 1                          |
| 8020349 | ANKRD20B CCDC2 | -1.2815697 | down | ankyrin repeat domain 20B   coiled-coil domain containin     |
| 7910591 | C1orf57        | -1.2817796 | down | chromosome 1 open reading frame 57                           |
| 8025828 | LDLR           | -1.2823768 | down | low density lipoprotein receptor (familial hypercholesterolo |
| 8014248 | SLFN13         | -1.2842282 | down | schlafen family member 13                                    |
| 7962185 | AMN1           | -1.2845501 | down | antagonist of mitotic exit network 1 homolog (S. cerevisia   |
| 8080810 | PTPRG          | -1.2856802 | down | protein tyrosine phosphatase, receptor type, G               |
| 8133057 | ZNF138         | -1.2857667 | down | zinc finger protein 138                                      |
| 8168412 | LOC554203      | -1.2860453 | down |                                                              |
| 8079140 | SNRK           | -1.2861712 | down | SNF related kinase                                           |
| 7943779 | C11orf1        | -1.288461  | down | chromosome 11 open reading frame 1                           |
| 7899455 | PHACTR4        | -1.2888045 | down | phosphatase and actin regulator 4                            |
| 7932765 | MPP7           | -1.2896317 | down | membrane protein, palmitoylated 7 (MAGUK p55 subfami         |
| 8144880 | SH2D4A         | -1.289912  | down | SH2 domain containing 4A                                     |
| 8130408 | PIP3-E         | -1.2909465 | down |                                                              |
| 7971015 | SMAD9          | -1.2929447 | down | SMAD family member 9                                         |
| 8112439 | CCDC125        | -1.2951577 | down | coiled-coil domain containing 125                            |
| 7954729 | FGD4           | -1.2968122 | down | FYVE, RhoGEF and PH domain containing 4                      |
| 7957072 | RAB3IP         | -1.2987274 | down | RAB3A interacting protein (rabin3)                           |
| 8091283 | PLOD2          | -1.3027874 | down | procollagen-lysine, 2-oxoglutarate 5-dioxygenase 2           |

## Supplemental Table 1b

eMSC vs. eEN

|         |                 |            |      |                                                             |
|---------|-----------------|------------|------|-------------------------------------------------------------|
| 8097373 | C4orf29         | -1.303233  | down | chromosome 4 open reading frame 29                          |
| 7976496 | SERPINA3        | -1.3048133 | down | serpin peptidase inhibitor, clade A (alpha-1 antiproteinase |
| 7930454 | PDCD4           | -1.3053741 | down | programmed cell death 4 (neoplastic transformation inhib    |
| 8159919 | C9orf68         | -1.3053894 | down | chromosome 9 open reading frame 68                          |
| 8143341 | JHDM1D          | -1.305722  | down | jumonji C domain containing histone demethylase 1 homc      |
| 7934133 | PPA1            | -1.3059993 | down | pyrophosphatase (inorganic) 1                               |
| 8074845 | ZNF280B         | -1.3071594 | down | zinc finger protein 280B                                    |
| 8094126 | DUB4 USP17 DUE  | -1.31021   | down | deubiquitinating enzyme DUB4   ubiquitin specific peptid    |
| 8094118 | DUB4 USP17 DUE  | -1.3102951 | down | deubiquitinating enzyme DUB4   ubiquitin specific peptid    |
| 8016457 | HOXB5           | -1.3104271 | down | homeobox B5                                                 |
| 8094120 | DUB4 USP17 DUE  | -1.310779  | down | deubiquitinating enzyme DUB4   ubiquitin specific peptid    |
| 7953765 | FAM80B          | -1.310833  | down | family with sequence similarity 80, member B                |
| 8094128 | DUB4 USP17 DUE  | -1.3115394 | down | deubiquitinating enzyme DUB4   ubiquitin specific peptid    |
| 8094116 | CPZ USP17 DUB3  | -1.3116701 | down | carboxypeptidase Z   ubiquitin specific peptidase 17   del  |
| 8094132 | DUB4 USP17 DUE  | -1.3119437 | down | deubiquitinating enzyme DUB4   ubiquitin specific peptid    |
| 8095705 | MTHFD2L         | -1.3124224 | down | methylenetetrahydrofolate dehydrogenase (NADP+ deper        |
| 8094378 | PI4K2B          | -1.3124722 | down | phosphatidylinositol 4-kinase type 2 beta                   |
| 8094124 | DUB4 USP17 DUE  | -1.312771  | down | deubiquitinating enzyme DUB4   ubiquitin specific peptid    |
| 8038989 | ZNF600          | -1.3130229 | down | zinc finger protein 600                                     |
| 8091009 | PIK3CB          | -1.3134768 | down | phosphoinositide-3-kinase, catalytic, beta polypeptide      |
| 8173551 | PHKA1           | -1.3155637 | down | phosphorylase kinase, alpha 1 (muscle)                      |
| 8042086 | VRK2            | -1.3168627 | down | vaccinia related kinase 2                                   |
| 7927062 | ZNF33A          | -1.3180814 | down | zinc finger protein 33A                                     |
| 7903092 | FNBP1L          | -1.320183  | down | formin binding protein 1-like                               |
| 8114006 | FLJ44796        | -1.3202596 | down |                                                             |
| 8095986 | ANXA3           | -1.320728  | down | annexin A3                                                  |
| 7935692 | ERLIN1          | -1.3224015 | down | ER lipid raft associated 1                                  |
| 8140468 | tcag7.1314      | -1.3233359 | down | hypothetical protein LOC54103                               |
| 7955637 | KRT18           | -1.3256075 | down | keratin 18                                                  |
| 7990054 | UACA            | -1.3259848 | down | uveal autoantigen with coiled-coil domains and ankyrin re   |
| 8094122 | DUB4 USP17 DUE  | -1.3271254 | down | deubiquitinating enzyme DUB4   ubiquitin specific peptid    |
| 8104506 | TRIO LOC1001317 | -1.3289486 | down | triple functional domain (PTPRF interacting)   hypothetica  |
| 8021727 | CNDP2           | -1.3291808 | down | CNDP dipeptidase 2 (metallopeptidase M20 family)            |

Supplemental Table 1b  
eMSC vs. eEN

|         |                |            |      |                                                                                      |
|---------|----------------|------------|------|--------------------------------------------------------------------------------------|
| 8155707 | TJP2           | -1.3311296 | down | tight junction protein 2 (zona occludens 2)                                          |
| 8001547 | PLLP           | -1.3312646 | down | plasma membrane proteolipid (plasmolipin)                                            |
| 8039068 | NDUFV2         | -1.3322271 | down | NADH dehydrogenase (ubiquinone) flavoprotein 2, 24kDa                                |
| 8094130 | DUB4 USP17 DUE | -1.3327585 | down | deubiquitinating enzyme DUB4   ubiquitin specific peptidase                          |
| 8120679 | DDX43          | -1.3328329 | down | DEAD (Asp-Glu-Ala-Asp) box polypeptide 43                                            |
| 8089299 | CD47           | -1.3336018 | down |                                                                                      |
| 8027260 | ZNF486         | -1.3347706 | down | zinc finger protein 486                                                              |
| 7960984 | PZP            | -1.3367705 | down | pregnancy-zone protein                                                               |
| 7899043 | SEPN1          | -1.3367906 | down | selenoprotein N, 1                                                                   |
| 8172056 | RPGR           | -1.3380198 | down | retinitis pigmentosa GTPase regulator                                                |
| 8103226 | TMEM154        | -1.3404975 | down | transmembrane protein 154                                                            |
| 7914809 | KIAA0319L      | -1.3417512 | down | KIAA0319-like                                                                        |
| 8136315 | LRGUK          | -1.3431787 | down | leucine-rich repeats and guanylate kinase domain contain                             |
| 7944751 | C11orf63       | -1.3443589 | down | chromosome 11 open reading frame 63                                                  |
| 7975889 | VASH1          | -1.3465226 | down | vasohibin 1                                                                          |
| 8088776 | FOXP1          | -1.3475537 | down | forkhead box P1                                                                      |
| 7906400 | IFI16          | -1.34875   | down | interferon, gamma-inducible protein 16                                               |
| 8112342 | ADAMTS6        | -1.3504227 | down | ADAM metalloproteinase with thrombospondin type 1 motif                              |
| 7961075 | CD69           | -1.3537315 | down |                                                                                      |
| 7903334 | CDC14A         | -1.3557537 | down | CDC14 cell division cycle 14 homolog A ( <i>S. cerevisiae</i> )                      |
| 7947199 | LGR4           | -1.3568975 | down | leucine-rich repeat-containing G protein-coupled receptor                            |
| 8067040 | NFATC2         | -1.3570838 | down | nuclear factor of activated T-cells, cytoplasmic, calcineurin                        |
| 7901915 | ALG6           | -1.3574169 | down | asparagine-linked glycosylation 6 homolog ( <i>S. cerevisiae</i> , <i>S. pombe</i> ) |
| 7899627 | TINAGL1        | -1.3583174 | down | tubulointerstitial nephritis antigen-like 1                                          |
| 8099685 | LGI2           | -1.3587667 | down | leucine-rich repeat LGI family, member 2                                             |
| 8161865 | PRUNE2 LOC1001 | -1.3608384 | down | prune homolog 2 ( <i>Drosophila</i> )   similar to KIAA0367                          |
| 8062852 | PKIG           | -1.3623216 | down | protein kinase (cAMP-dependent, catalytic) inhibitor gamma                           |
| 8080926 | ARL6IP5        | -1.3632715 | down | ADP-ribosylation-like factor 6 interacting protein 5                                 |
| 7996772 | SLC7A6 TRPV6   | -1.3633765 | down | solute carrier family 7 (cationic amino acid transporter, y+)                        |
| 7962146 | FAM60A         | -1.3639678 | down | family with sequence similarity 60, member A                                         |
| 8020468 | RBBP8          | -1.3670034 | down | retinoblastoma binding protein 8                                                     |
| 7950883 | OR7E13P        | -1.3679233 | down | olfactory receptor, family 7, subfamily E, member 13 pseudogene                      |
| 7956759 | SRGAP1         | -1.3689598 | down | SLIT-ROBO Rho GTPase activating protein 1                                            |

## Supplemental Table 1b

eMSC vs. eEN

|         |                     |            |      |                                                                |
|---------|---------------------|------------|------|----------------------------------------------------------------|
| 8112649 | KIAA0888            | -1.3692697 | down |                                                                |
| 7917503 | GBP3                | -1.3719876 | down | guanylate binding protein 3                                    |
| 8146517 | CHCHD7              | -1.3740983 | down | coiled-coil-helix-coiled-coil-helix domain containing 7        |
| 8025672 | SLC44A2             | -1.3757691 | down | solute carrier family 44, member 2                             |
| 8056102 | CD302               | -1.3760148 | down |                                                                |
| 8052382 | FANCL               | -1.3764133 | down | Fanconi anemia, complementation group L                        |
| 7951807 | CADM1 LOC100132764  | -1.376483  | down | cell adhesion molecule 1   hypothetical LOC100132764           |
| 7940028 | SERPING1            | -1.3766719 | down | serpin peptidase inhibitor, clade G (C1 inhibitor), member 1   |
| 8143961 | PRKAG2              | -1.3779497 | down | protein kinase, AMP-activated, gamma 2 non-catalytic subunit   |
| 8158671 | ASS1                | -1.3799638 | down | argininosuccinate synthetase 1                                 |
| 8016444 | HOXB3               | -1.3801713 | down | homeobox B3                                                    |
| 8122464 | UTRN                | -1.3809904 | down | utrophin                                                       |
| 8141094 | PDK4                | -1.3828449 | down | pyruvate dehydrogenase kinase, isozyme 4                       |
| 8049512 | LRRFIP1             | -1.3832724 | down | leucine rich repeat (in FLII) interacting protein 1            |
| 7936419 | C10orf118           | -1.3840332 | down | chromosome 10 open reading frame 118                           |
| 7929816 | SCD                 | -1.3843169 | down | stearoyl-CoA desaturase (delta-9-desaturase)                   |
| 8102050 | NHEDC2              | -1.3844298 | down | Na <sup>+</sup> /H <sup>+</sup> exchanger domain containing 2  |
| 8020058 | NDUFV2              | -1.3847647 | down | NADH dehydrogenase (ubiquinone) flavoprotein 2, 24kDa          |
| 8020878 | MAPRE2              | -1.3857901 | down | microtubule-associated protein, RP/EB family, member 2         |
| 8146427 | PCMTD1 LOC100132764 | -1.3860604 | down | protein-L-isoaspartate (D-aspartate) O-methyltransferase       |
| 8147661 | SPAG1               | -1.3865566 | down | sperm associated antigen 1                                     |
| 7917912 | DPYD                | -1.3872375 | down | dihydropyrimidine dehydrogenase                                |
| 7956261 | RBMS2               | -1.3874646 | down | RNA binding motif, single stranded interacting protein 2       |
| 7965322 | KITLG               | -1.3909049 | down | KIT ligand                                                     |
| 8170007 | LOC644538           | -1.3912616 | down |                                                                |
| 8105899 | MARVELD2            | -1.393136  | down | MARVEL domain containing 2                                     |
| 7946439 | TMEM9B              | -1.3942538 | down | TMEM9 domain family, member B                                  |
| 8177498 | MARVELD2            | -1.395668  | down | MARVEL domain containing 2                                     |
| 8037505 | TRAPPC6A            | -1.3998451 | down | trafficking protein particle complex 6A                        |
| 8052721 | PPP3R1 WDR92        | -1.4029421 | down | protein phosphatase 3 (formerly 2B), regulatory subunit B      |
| 8097056 | SNORA24             | -1.4041444 | down | small nucleolar RNA, H/ACA box 24                              |
| 8106210 | RGNEF               | -1.4047815 | down | Rho-guanine nucleotide exchange factor                         |
| 7925531 | AKT3                | -1.4096985 | down | v-akt murine thymoma viral oncogene homolog 3 (protein kinase) |

## Supplemental Table 1b

eMSC vs. eEN

|         |                  |            |      |                                                           |
|---------|------------------|------------|------|-----------------------------------------------------------|
| 8042468 | ANXA4            | -1.4100018 | down | annexin A4                                                |
| 8106354 | IQGAP2           | -1.4117271 | down | IQ motif containing GTPase activating protein 2           |
| 8009353 | PITPNC1          | -1.4140823 | down | phosphatidylinositol transfer protein, cytoplasmic 1      |
| 8119088 | CDKN1A           | -1.4143466 | down | cyclin-dependent kinase inhibitor 1A (p21, Cip1)          |
| 8101757 | GPRIN3           | -1.4161153 | down | GPRIN family member 3                                     |
| 8016847 | TRIM25           | -1.4197872 | down | tripartite motif-containing 25                            |
| 7950473 | ARRB1            | -1.4223824 | down | arrestin, beta 1                                          |
| 8015635 | PTRF             | -1.4230709 | down | polymerase I and transcript release factor                |
| 7954711 | C12orf35         | -1.4238235 | down | chromosome 12 open reading frame 35                       |
| 8128788 | FLJ42177 C6orf19 | -1.42673   | down | FLJ42177 protein   chromosome 6 open reading frame 19     |
| 7905147 | C1orf54          | -1.4297334 | down | chromosome 1 open reading frame 54                        |
| 7957338 | SYT1             | -1.4327971 | down | synaptotagmin I                                           |
| 8178977 | TAPBP            | -1.4350919 | down | TAP binding protein (tapasin)                             |
| 8104066 | SORBS2           | -1.4377656 | down | sorbin and SH3 domain containing 2                        |
| 8180166 | TAPBP            | -1.4378535 | down | TAP binding protein (tapasin)                             |
| 7920600 | SHC1             | -1.4380475 | down | SHC (Src homology 2 domain containing) transforming prc   |
| 8103881 | RWDD4A           | -1.4381874 | down | RWD domain containing 4A                                  |
| 8031837 | ZNF587           | -1.4405615 | down | zinc finger protein 587                                   |
| 7989037 | CCPG1            | -1.4434139 | down | cell cycle progression 1                                  |
| 7954077 | KIAA1467         | -1.4442443 | down |                                                           |
| 8058161 | ORC2L            | -1.4450824 | down | origin recognition complex, subunit 2-like (yeast)        |
| 8146092 | INDO             | -1.4462543 | down | indoleamine-pyrrole 2,3 dioxygenase                       |
| 8001099 | HERC2P4          | -1.4508264 | down | hect domain and RLD 2 pseudogene 4                        |
| 8097098 | USP53            | -1.4512345 | down | ubiquitin specific peptidase 53                           |
| 8001067 | HERC2P4          | -1.4537492 | down | hect domain and RLD 2 pseudogene 4                        |
| 8074286 | MICAL3           | -1.4538003 | down | microtubule associated monooxygenase, calponin and LIM    |
| 8122327 | CCDC28A          | -1.4555529 | down | coiled-coil domain containing 28A                         |
| 8103563 | DDX60            | -1.4557024 | down | DEAD (Asp-Glu-Ala-Asp) box polypeptide 60                 |
| 7996947 | CYB5B            | -1.4601554 | down | cytochrome b5 type B (outer mitochondrial membrane)       |
| 8153684 | DGAT1 LOC72776   | -1.4657456 | down | diacylglycerol O-acyltransferase homolog 1 (mouse)   simi |
| 7909332 | CD55             | -1.46598   | down |                                                           |
| 8153939 | DGAT1 LOC72776   | -1.4678438 | down | diacylglycerol O-acyltransferase homolog 1 (mouse)   simi |
| 7898693 | ALPL             | -1.4702709 | down | alkaline phosphatase, liver/bone/kidney                   |



## Supplemental Table 1b

eMSC vs. eEN

|         |         |            |      |                                                           |
|---------|---------|------------|------|-----------------------------------------------------------|
| 8147439 | PLEKHF2 | -1.4727644 | down | pleckstrin homology domain containing, family F (with FY  |
| 8041781 | EPAS1   | -1.4733546 | down | endothelial PAS domain protein 1                          |
| 8083839 | GPR160  | -1.4747162 | down | G protein-coupled receptor 160                            |
| 7921487 | TAGLN2  | -1.4770992 | down | transgelin 2                                              |
| 8098041 | TMEM144 | -1.4780539 | down | transmembrane protein 144                                 |
| 8056022 | CCDC148 | -1.4780915 | down | coiled-coil domain containing 148                         |
| 8120783 | MYO6    | -1.4810435 | down | myosin VI                                                 |
| 8147221 | OSGIN2  | -1.483193  | down | oxidative stress induced growth inhibitor family member 2 |
| 8051547 | PRKD3   | -1.484368  | down | protein kinase D3                                         |
| 7923824 | SLC41A1 | -1.4848516 | down | solute carrier family 41, member 1                        |
| 7986092 | FURIN   | -1.4849037 | down | furin (paired basic amino acid cleaving enzyme)           |
| 8131881 | C7orf46 | -1.4904801 | down | chromosome 7 open reading frame 46                        |
| 7972297 | ABCC4   | -1.4920641 | down | ATP-binding cassette, sub-family C (CFTR/MRP), member 4   |
| 8070819 | PTTG1IP | -1.4931272 | down | pituitary tumor-transforming 1 interacting protein        |
| 8180061 | TAP1    | -1.4933329 | down | transporter 1, ATP-binding cassette, sub-family B (MDR/T) |
| 8171034 | SPRY3   | -1.4935389 | down | sprouty homolog 3 (Drosophila)                            |
| 8178867 | TAP1    | -1.4942998 | down | transporter 1, ATP-binding cassette, sub-family B (MDR/T) |
| 8125512 | TAP1    | -1.4957472 | down | transporter 1, ATP-binding cassette, sub-family B (MDR/T) |
| 8161839 | C9orf95 | -1.4969448 | down | chromosome 9 open reading frame 95                        |
| 8176955 | SPRY3   | -1.4987831 | down | sprouty homolog 3 (Drosophila)                            |
| 8111101 | ANKH    | -1.4991859 | down | ankylosis, progressive homolog (mouse)                    |
| 7910792 | RYR2    | -1.4993421 | down | ryanodine receptor 2 (cardiac)                            |
| 8079305 | CLEC3B  | -1.5038805 | down | C-type lectin domain family 3, member B                   |
| 7966929 | RAB35   | -1.5042742 | down |                                                           |
| 8007620 | GRN     | -1.5108116 | down | granulin                                                  |
| 7913558 | LUZP1   | -1.5138936 | down | leucine zipper protein 1                                  |
| 8011884 | NLRP1   | -1.5157884 | down | NLR family, pyrin domain containing 1                     |
| 8106068 | MCCC2   | -1.5158451 | down | methylcrotonoyl-Coenzyme A carboxylase 2 (beta)           |
| 8069178 | ADARB1  | -1.5159893 | down | adenosine deaminase, RNA-specific, B1 (RED1 homolog ra    |
| 8177601 | MCCC2   | -1.516477  | down | methylcrotonoyl-Coenzyme A carboxylase 2 (beta)           |
| 8168691 | DIAPH2  | -1.5172751 | down | diaphanous homolog 2 (Drosophila)                         |
| 8037847 | AP2S1   | -1.5200423 | down | adaptor-related protein complex 2, sigma 1 subunit        |
| 7907861 | XPR1    | -1.5247319 | down | xenotropic and polytropic retrovirus receptor             |

## Supplemental Table 1b

eMSC vs. eEN

|         |                |            |      |                                                                          |
|---------|----------------|------------|------|--------------------------------------------------------------------------|
| 8169949 | RP6-213H19.1   | -1.526604  | down | serine/threonine protein kinase MST4                                     |
| 8001197 | NETO2          | -1.527174  | down | neuropilin (NRP) and tolloid (TLL)-like 2                                |
| 8128099 | GABRR2         | -1.5286648 | down | gamma-aminobutyric acid (GABA) receptor, rho 2                           |
| 8096130 | CDS1           | -1.530308  | down | CDP-diacylglycerol synthase (phosphatidate cytidyltransferase)           |
| 7952036 | MPZL3          | -1.5311959 | down | myelin protein zero-like 3                                               |
| 7953291 | CD9            | -1.5329894 | down |                                                                          |
| 8027701 | GRAMD1A        | -1.5349865 | down | GRAM domain containing 1A                                                |
| 8169995 | FAM122C        | -1.5360715 | down | family with sequence similarity 122C                                     |
| 8115783 | STK10          | -1.5364758 | down | serine/threonine kinase 10                                               |
| 8100541 | IGFBP7         | -1.5434543 | down | insulin-like growth factor binding protein 7                             |
| 7968035 | SPATA13 C1QTNF | -1.544107  | down | spermatogenesis associated 13   C1q and tumor necrosis factor            |
| 8150830 | LYPLA1         | -1.5441142 | down | lysophospholipase I                                                      |
| 7965436 | EEA1           | -1.5445317 | down | early endosome antigen 1                                                 |
| 8083136 | ATP1B3         | -1.5476953 | down | ATPase, Na <sup>+</sup> /K <sup>+</sup> transporting, beta 3 polypeptide |
| 7961532 | ARHGDI1        | -1.5497482 | down | Rho GDP dissociation inhibitor (GDI) beta                                |
| 8067554 | TCFL5          | -1.5526552 | down | transcription factor-like 5 (basic helix-loop-helix)                     |
| 7920472 | TPM3           | -1.5535748 | down | tropomyosin 3                                                            |
| 7914516 | LOC339483      | -1.5578746 | down |                                                                          |
| 8094134 | DUB4           | -1.5621991 | down |                                                                          |
| 7935660 | DNMBP          | -1.5638052 | down | dynamamin binding protein                                                |
| 7940643 | ASRGL1         | -1.5668961 | down | asparaginase like 1                                                      |
| 7926916 | ZEB1           | -1.5709883 | down | zinc finger E-box binding homeobox 1                                     |
| 8135576 | TES            | -1.5716414 | down | testis derived transcript (3 LIM domains)                                |
| 8129562 | CTGF           | -1.5720383 | down | connective tissue growth factor                                          |
| 7996908 | SNTB2          | -1.57297   | down | syntrophin, beta 2 (dystrophin-associated protein A1, 59k)               |
| 7983734 | TMOD2          | -1.574139  | down | tropomodulin 2 (neuronal)                                                |
| 8144758 | ZDHHC2         | -1.5741569 | down | zinc finger, DHHC-type containing 2                                      |
| 8029489 | BCAM           | -1.5750499 | down | basal cell adhesion molecule (Lutheran blood group)                      |
| 8003171 | COTL1          | -1.5751697 | down | coactosin-like 1 (Dictyostelium)                                         |
| 8089261 | CBLB           | -1.5753332 | down | Cas-Br-M (murine) ecotropic retroviral transforming sequence             |
| 8173310 | OPHN1          | -1.5760151 | down | oligophrenin 1                                                           |
| 8149071 | ANGPT2         | -1.5785048 | down | angiopoietin 2                                                           |
| 8046003 | GCA            | -1.5792481 | down | grancalcin, EF-hand calcium binding protein                              |

## Supplemental Table 1b

eMSC vs. eEN

|         |                 |            |      |                                                             |
|---------|-----------------|------------|------|-------------------------------------------------------------|
| 7917304 | MCOLN3          | -1.5799444 | down | mucolipin 3                                                 |
| 8052735 | CNRIP1          | -1.5829797 | down | cannabinoid receptor interacting protein 1                  |
| 8029465 | BCL3            | -1.5863253 | down | B-cell CLL/lymphoma 3                                       |
| 8103601 | DDX60L          | -1.5874432 | down | DEAD (Asp-Glu-Ala-Asp) box polypeptide 60-like              |
| 7971780 | NEK3            | -1.5894697 | down | NIMA (never in mitosis gene a)-related kinase 3             |
| 8146717 | SGK3 C8orf44    | -1.5896921 | down | serum/glucocorticoid regulated kinase family, member 3      |
| 8028524 | ACTN4           | -1.5900244 | down | actinin, alpha 4                                            |
| 7950838 | PICALM          | -1.5911455 | down | phosphatidylinositol binding clathrin assembly protein      |
| 8078397 | CMTM8           | -1.5917453 | down | CKLF-like MARVEL transmembrane domain containing 8          |
| 8086953 | SHISA5          | -1.5933037 | down | shisa homolog 5 ( <i>Xenopus laevis</i> )                   |
| 8179351 | CFB             | -1.5943514 | down | complement factor B                                         |
| 7989365 | RORA            | -1.5981153 | down | RAR-related orphan receptor A                               |
| 7908125 | RGL1            | -1.5991907 | down | ral guanine nucleotide dissociation stimulator-like 1       |
| 8117813 | HLA-H HLA-A HLA | -1.6014874 | down | major histocompatibility complex, class I, H (pseudogene)   |
| 7970602 | PARP4           | -1.6020509 | down | poly (ADP-ribose) polymerase family, member 4               |
| 7986569 | LOC283755 HERC: | -1.602208  | down | hypothetical protein LOC283755   hect domain and RLD 2      |
| 8134552 | ARPC1B          | -1.6024878 | down | actin related protein 2/3 complex, subunit 1B, 41kDa        |
| 8139198 | RWDD4A          | -1.6032275 | down | RWD domain containing 4A                                    |
| 8030133 | NUCB1           | -1.6038699 | down | nucleobindin 1                                              |
| 7955578 | GRASP           | -1.6054071 | down | GRP1 (general receptor for phosphoinositides 1)-associate   |
| 7948229 | SLC43A3         | -1.6063619 | down | solute carrier family 43, member 3                          |
| 8041447 | CRIM1           | -1.609757  | down | cysteine rich transmembrane BMP regulator 1 (chordin-lik    |
| 8151475 | TPD52           | -1.6108767 | down | tumor protein D52                                           |
| 8135568 | MDFIC           | -1.6121752 | down | MyoD family inhibitor domain containing                     |
| 8179049 | HLA-A HLA-B HLA | -1.6141547 | down | major histocompatibility complex, class I, A   major histoc |
| 7983512 | SQRDL           | -1.6145558 | down | sulfide quinone reductase-like (yeast)                      |
| 8117777 | HLA-G HLA-A HLA | -1.6156677 | down | major histocompatibility complex, class I, G   major histoc |
| 8003357 | FAM38A          | -1.6165097 | down | family with sequence similarity 38, member A                |
| 8010243 | SYNGR2          | -1.6183378 | down | synaptogyrin 2                                              |
| 7986701 | HERC2P2 LOC283  | -1.6210544 | down | hect domain and RLD 2 pseudogene 2   hypothetical prot      |
| 8117034 | GMPR            | -1.6247911 | down | guanosine monophosphate reductase                           |
| 7926223 | CAMK1D          | -1.6320059 | down | calcium/calmodulin-dependent protein kinase ID              |
| 8137280 | NOS3            | -1.6362739 | down | nitric oxide synthase 3 (endothelial cell)                  |

Supplemental Table 1b  
eMSC vs. eEN

|         |                 |            |      |                                                             |
|---------|-----------------|------------|------|-------------------------------------------------------------|
| 8179034 | HLA-G HLA-A     | -1.6392348 | down | major histocompatibility complex, class I, G   major histoc |
| 8178419 | FLOT1           | -1.6413683 | down | flotillin 1                                                 |
| 7969677 | MBNL2           | -1.6427938 | down | muscleblind-like 2 (Drosophila)                             |
| 7982154 | HERC2P2 LOC283  | -1.6430135 | down | hect domain and RLD 2 pseudogene 2   hypothetical prot      |
| 8124828 | FLOT1           | -1.6438471 | down | flotillin 1                                                 |
| 8164665 | RAPGEF1         | -1.6460664 | down | Rap guanine nucleotide exchange factor (GEF) 1              |
| 7910706 | LGALS8          | -1.6462542 | down | lectin, galactoside-binding, soluble, 8 (galectin 8)        |
| 8146462 | SOX17           | -1.6472434 | down | SRY (sex determining region Y)-box 17                       |
| 8102232 | LEF1            | -1.6498555 | down | lymphoid enhancer-binding factor 1                          |
| 8177725 | HLA-G HLA-A     | -1.6505425 | down | major histocompatibility complex, class I, G   major histoc |
| 8179688 | FLOT1           | -1.6510061 | down | flotillin 1                                                 |
| 8009183 | MAP3K3          | -1.6517359 | down | mitogen-activated protein kinase kinase kinase 3            |
| 8046546 | HOXD8           | -1.6535568 | down | homeobox D8                                                 |
| 8087485 | UBA7            | -1.6552391 | down | ubiquitin-like modifier activating enzyme 7                 |
| 8138922 | KBTBD2          | -1.6557323 | down | kelch repeat and BTB (POZ) domain containing 2              |
| 8066939 | B4GALT5         | -1.6567044 | down | UDP-Gal:betaGlcNAc beta 1,4- galactosyltransferase, poly    |
| 8169473 | PLS3            | -1.6573933 | down | plastin 3 (T isoform)                                       |
| 8179041 | HLA-A HLA-H HLA | -1.6592997 | down | major histocompatibility complex, class I, A   major histoc |
| 7969428 | UCHL3           | -1.661235  | down | ubiquitin carboxyl-terminal esterase L3 (ubiquitin thiolest |
| 8084880 | HES1            | -1.6635802 | down | hairly and enhancer of split 1, (Drosophila)                |
| 7902425 | ST6GALNAC3      | -1.6699337 | down | ST6 (alpha-N-acetyl-neuraminyl-2,3-beta-galactosyl-1,3)-N   |
| 8163002 | KLF4            | -1.6746242 | down | Kruppel-like factor 4 (gut)                                 |
| 7939197 | HIPK3           | -1.6753075 | down | homeodomain interacting protein kinase 3                    |
| 8078350 | TGFBR2          | -1.6775975 | down | transforming growth factor, beta receptor II (70/80kDa)     |
| 7918857 | TSPAN2          | -1.6787432 | down | tetraspanin 2                                               |
| 8105040 | OSMR            | -1.6791399 | down | oncostatin M receptor                                       |
| 7995813 | MT1DP           | -1.6828809 | down | metallothionein 1D (pseudogene)                             |
| 8068353 | SLC5A3 MRPS6    | -1.6909722 | down | solute carrier family 5 (inositol transporters), member 3   |
| 8096361 | HERC5           | -1.6917531 | down | hect domain and RLD 5                                       |
| 7999909 | GPRC5B          | -1.6950332 | down | G protein-coupled receptor, family C, group 5, member B     |
| 8109283 | NDST1           | -1.6966094 | down | N-deacetylase/N-sulfotransferase (heparan glucosaminyl)     |
| 8015759 | VAT1            | -1.6968085 | down | vesicle amine transport protein 1 homolog (T. californica)  |
| 7909866 | MOSC2           | -1.6972004 | down | MOCO sulphurase C-terminal domain containing 2              |

## Supplemental Table 1b

eMSC vs. eEN

|         |                 |            |      |                                                            |
|---------|-----------------|------------|------|------------------------------------------------------------|
| 8157524 | TLR4            | -1.7012476 | down | toll-like receptor 4                                       |
| 8174119 | ZMAT1           | -1.7024808 | down | zinc finger, matrin type 1                                 |
| 8075106 | TPST2           | -1.7028434 | down | tyrosylprotein sulfotransferase 2                          |
| 7946579 | LYVE1           | -1.7032169 | down | lymphatic vessel endothelial hyaluronan receptor 1         |
| 8138842 | NOD1            | -1.7033869 | down | nucleotide-binding oligomerization domain containing 1     |
| 8167965 | MSN             | -1.7071806 | down | moesin                                                     |
| 8131339 | FSCN1           | -1.7082003 | down | fascin homolog 1, actin-bundling protein (Strongylocentro  |
| 8140478 | tcag7.1314      | -1.7134051 | down | hypothetical protein LOC54103                              |
| 7957417 | TMTC2           | -1.7136428 | down | transmembrane and tetratricopeptide repeat containing 2    |
| 8082100 | PARP14          | -1.7162758 | down | poly (ADP-ribose) polymerase family, member 14             |
| 8136954 | FAM139B LOC652  | -1.7189361 | down | family with sequence similarity 139, member B   similar to |
| 7984217 | PLEKHO2         | -1.7191807 | down | pleckstrin homology domain containing, family O member     |
| 8120428 | FKBP1A FKBP1C   | -1.7207466 | down | FK506 binding protein 1A, 12kDa   FK506 binding protein    |
| 8042416 | ARHGAP25        | -1.7230266 | down | Rho GTPase activating protein 25                           |
| 7905116 | PLEKHO1         | -1.7232956 | down | pleckstrin homology domain containing, family O member     |
| 8124562 | ZNF323          | -1.7249931 | down | zinc finger protein 323                                    |
| 7939150 | PRRG4           | -1.7252957 | down | proline rich Gla (G-carboxyglutamic acid) 4 (transmembran  |
| 8142424 | GPR85           | -1.7262381 | down | G protein-coupled receptor 85                              |
| 7958913 | OAS2            | -1.7294767 | down | 2'-5'-oligoadenylate synthetase 2, 69/71kDa                |
| 8160559 | DDX58           | -1.7297171 | down | DEAD (Asp-Glu-Ala-Asp) box polypeptide 58                  |
| 8043203 | VAMP5           | -1.7307771 | down | vesicle-associated membrane protein 5 (myobrevin)          |
| 7933750 | SLC16A9         | -1.7385509 | down | solute carrier family 16, member 9 (monocarboxylic acid t  |
| 7987454 | BMF             | -1.744218  | down | Bcl2 modifying factor                                      |
| 8100870 | ADAMTS3         | -1.7507408 | down | ADAM metalloproteinase with thrombospondin type 1 mo       |
| 7922610 | ABL2            | -1.7526553 | down | v-abl Abelson murine leukemia viral oncogene homolog 2     |
| 8123936 | NEDD9           | -1.7621639 | down | neural precursor cell expressed, developmentally down-re   |
| 8093304 | CCRL2 LOC727811 | -1.7654145 | down | chemokine (C-C motif) receptor-like 2   similar to chemok  |
| 8149733 | TNFRSF10B       | -1.7654612 | down | tumor necrosis factor receptor superfamily, member 10b     |
| 8090193 | HEG1            | -1.7664139 | down | HEG homolog 1 (zebrafish)                                  |
| 8057898 | HECW2           | -1.7666248 | down | HECT, C2 and WW domain containing E3 ubiquitin protein     |
| 7961230 | CSDA            | -1.7677997 | down | cold shock domain protein A                                |
| 8122279 | KIAA1244 LOC202 | -1.7679807 | down | KIAA1244   hypothetical protein LOC202451                  |
| 8058477 | KLF7            | -1.7687947 | down | Kruppel-like factor 7 (ubiquitous)                         |

## Supplemental Table 1b

eMSC vs. eEN

|         |                 |            |      |                                                             |
|---------|-----------------|------------|------|-------------------------------------------------------------|
| 8090591 | PLXND1          | -1.7719166 | down | plexin D1                                                   |
| 8175393 | ARHGEF6         | -1.7778099 | down | Rac/Cdc42 guanine nucleotide exchange factor (GEF) 6        |
| 8100251 | FRYL            | -1.7820076 | down | FRY-like                                                    |
| 7970716 | LNx2            | -1.7902948 | down | ligand of numb-protein X 2                                  |
| 8156199 | DAPK1           | -1.7968867 | down | death-associated protein kinase 1                           |
| 8136940 | FAM139A         | -1.8026949 | down | family with sequence similarity 139, member A               |
| 7950248 | FCHSD2          | -1.8034484 | down | FCH and double SH3 domains 2                                |
| 8114733 | CENTD3          | -1.8036617 | down | centaurin, delta 3                                          |
| 8117800 | HLA-A HLA-H HLA | -1.8082374 | down | major histocompatibility complex, class I, A   major histoc |
| 7980773 | CCDC88C         | -1.8129711 | down | coiled-coil domain containing 88C                           |
| 8143065 | C7orf49         | -1.8132356 | down | chromosome 7 open reading frame 49                          |
| 8013788 | FLOT2           | -1.8133924 | down | flotillin 2                                                 |
| 8111153 | MYO10           | -1.8170543 | down | myosin X                                                    |
| 8018864 | SOCS3           | -1.818793  | down | suppressor of cytokine signaling 3                          |
| 7949454 | MAP3K11         | -1.819682  | down | mitogen-activated protein kinase kinase kinase 11           |
| 7995825 | MT1F            | -1.8213581 | down | metallothionein 1F                                          |
| 7964745 | TMBIM4 LOC1001  | -1.822484  | down | transmembrane BAX inhibitor motif containing 4   hypoth     |
| 8078619 | ITGA9           | -1.8237287 | down | integrin, alpha 9                                           |
| 7933877 | JMJD1C          | -1.8242198 | down | jumonji domain containing 1C                                |
| 7995258 | ZNF267          | -1.8292866 | down | zinc finger protein 267                                     |
| 7976488 | SERPINA5        | -1.8322753 | down | serpin peptidase inhibitor, clade A (alpha-1 antiproteinase |
| 8122336 | C6orf115        | -1.8331794 | down | chromosome 6 open reading frame 115                         |
| 8152506 | SAMD12          | -1.833388  | down | sterile alpha motif domain containing 12                    |
| 8068361 | SLC5A3          | -1.8340572 | down | solute carrier family 5 (inositol transporters), member 3   |
| 8038163 | RASIP1          | -1.8363224 | down | Ras interacting protein 1                                   |
| 8091327 | PLSCR1          | -1.842694  | down | phospholipid scramblase 1                                   |
| 7996954 | NFAT5           | -1.8430439 | down | nuclear factor of activated T-cells 5, tonicity-responsive  |
| 8064868 | RP5-1022P6.2    | -1.8455435 | down | hypothetical protein KIAA1434                               |
| 8018264 | C17orf28        | -1.8470145 | down | chromosome 17 open reading frame 28                         |
| 8137566 | RNF32           | -1.8477585 | down | ring finger protein 32                                      |
| 8105741 | MAST4 LOC10012  | -1.8483602 | down | microtubule associated serine/threonine kinase family me    |
| 8147516 | MATN2           | -1.8497249 | down | matrilin 2                                                  |
| 8164200 | ANGPTL2         | -1.8501632 | down | angiopoietin-like 2                                         |

## Supplemental Table 1b

eMSC vs. eEN

|         |                 |            |      |                                                             |
|---------|-----------------|------------|------|-------------------------------------------------------------|
| 8174474 | ACSL4           | -1.8514175 | down | acyl-CoA synthetase long-chain family member 4              |
| 7996571 | FAM65A          | -1.8517913 | down | family with sequence similarity 65, member A                |
| 8062557 | PPP1R16B        | -1.8528553 | down | protein phosphatase 1, regulatory (inhibitor) subunit 16B   |
| 8149500 | MTUS1           | -1.8548663 | down | mitochondrial tumor suppressor 1                            |
| 7940775 | RARRES3         | -1.8564954 | down | retinoic acid receptor responder (tazarotene induced) 3     |
| 8022674 | CDH2            | -1.8586566 | down | cadherin 2, type 1, N-cadherin (neuronal)                   |
| 7978712 | CLEC14A         | -1.860429  | down | C-type lectin domain family 14, member A                    |
| 7987192 | SLC12A6         | -1.8636361 | down | solute carrier family 12 (potassium/chloride transporters)  |
| 8016468 | HOXB7           | -1.8641342 | down | homeobox B7                                                 |
| 8023415 | TCF4            | -1.8697408 | down | transcription factor 4                                      |
| 8008185 | ABI3            | -1.870343  | down | ABI gene family, member 3                                   |
| 7983111 | SNAP23          | -1.8704345 | down | synaptosomal-associated protein, 23kDa                      |
| 8138930 | RP9P            | -1.870463  | down | retinitis pigmentosa 9 pseudogene                           |
| 8016463 | HOXB6           | -1.871454  | down | homeobox B6                                                 |
| 8100382 | CHIC2           | -1.8715905 | down | cysteine-rich hydrophobic domain 2                          |
| 8091778 | SCARNA7         | -1.8820484 | down | small Cajal body-specific RNA 7                             |
| 8166469 | SAT1            | -1.8851006 | down | spermidine/spermine N1-acetyltransferase 1                  |
| 8077499 | LOH3CR2A        | -1.8855649 | down | loss of heterozygosity, 3, chromosomal region 2, gene A     |
| 8060765 | PRND            | -1.8870286 | down | prion protein 2 (dublet)                                    |
| 8125383 | NOTCH4 GPSM3    | -1.8879523 | down | Notch homolog 4 (Drosophila)   G-protein signaling modu     |
| 8099797 | RELL1           | -1.8886129 | down | RELT-like 1                                                 |
| 7975361 | KIAA0247        | -1.8901867 | down |                                                             |
| 7940191 | STX3            | -1.8919548 | down | syntaxin 3                                                  |
| 8129649 | C6orf192        | -1.8934315 | down | chromosome 6 open reading frame 192                         |
| 7999387 | EMP2            | -1.8936427 | down | epithelial membrane protein 2                               |
| 8020495 | CABLES1         | -1.8958354 | down | Cdk5 and Abl enzyme substrate 1                             |
| 8060895 | RNU105B         | -1.8968883 | down | RNA, U105B small nucleolar                                  |
| 8004184 | XAF1            | -1.897341  | down | XIAP associated factor 1                                    |
| 8068761 | ABCG1           | -1.8976071 | down | ATP-binding cassette, sub-family G (WHITE), member 1        |
| 8079407 | CCRL2 LOC727811 | -1.8987892 | down | chemokine (C-C motif) receptor-like 2   similar to chemok   |
| 8052731 | WDR92           | -1.9020649 | down | WD repeat domain 92                                         |
| 8067055 | ATP9A           | -1.9060242 | down | ATPase, class II, type 9A                                   |
| 8177732 | HLA-A HLA-H HLA | -1.9066216 | down | major histocompatibility complex, class I, A   major histoc |

Supplemental Table 1b  
eMSC vs. eEN

|         |                 |            |      |                                                            |
|---------|-----------------|------------|------|------------------------------------------------------------|
| 8164810 | RALGDS          | -1.9101839 | down | ral guanine nucleotide dissociation stimulator             |
| 7918902 | CD58            | -1.9117048 | down |                                                            |
| 8001531 | MT1G            | -1.9120182 | down | metallothionein 1G                                         |
| 8029437 | PVR             | -1.9151124 | down | poliovirus receptor                                        |
| 8081758 | GRAMD1C         | -1.917466  | down | GRAM domain containing 1C                                  |
| 8122637 | SASH1           | -1.919657  | down | SAM and SH3 domain containing 1                            |
| 8006779 | ARHGAP23        | -1.9214562 | down | Rho GTPase activating protein 23                           |
| 7975459 | SIPA1L1         | -1.9258806 | down | signal-induced proliferation-associated 1 like 1           |
| 7936242 | KIAA1754        | -1.9270655 | down |                                                            |
| 8045857 | LOC554201       | -1.9286219 | down |                                                            |
| 8111339 | MTMR12          | -1.928816  | down | myotubularin related protein 12                            |
| 8124911 | HLA-B XXbac-BPG | -1.9310397 | down | major histocompatibility complex, class I, B   MHC class I |
| 8098103 | FNIP2           | -1.9317406 | down | folliculin interacting protein 2                           |
| 8118594 | HLA-DPB1        | -1.932055  | down | major histocompatibility complex, class II, DP beta 1      |
| 8137526 | INSIG1          | -1.9326044 | down | insulin induced gene 1                                     |
| 8171762 | RPS6KA3         | -1.9345142 | down | ribosomal protein S6 kinase, 90kDa, polypeptide 3          |
| 8171481 | AP1S2           | -1.9352107 | down | adaptor-related protein complex 1, sigma 2 subunit         |
| 8068238 | IFNAR2          | -1.9352527 | down | interferon (alpha, beta and omega) receptor 2              |
| 8175492 | ATP11C          | -1.9387373 | down | ATPase, class VI, type 11C                                 |
| 7909890 | HLX             | -1.9402268 | down | H2.0-like homeobox                                         |
| 7914603 | RNF19B          | -1.942252  | down | ring finger protein 19B                                    |
| 7971950 | DACH1           | -1.942313  | down | dachshund homolog 1 (Drosophila)                           |
| 8178653 | SLC44A4         | -1.9423772 | down | solute carrier family 44, member 4                         |
| 7934842 | MMRN2           | -1.9434624 | down | multimerin 2                                               |
| 7994280 | IL4R            | -1.9454908 | down | interleukin 4 receptor                                     |
| 8125149 | SLC44A4         | -1.9504839 | down | solute carrier family 44, member 4                         |
| 7932552 | LOC100128663 PF | -1.950612  | down | similar to PRO3077   hypothetical protein PRO3077          |
| 8000811 | MAPK3           | -1.9539565 | down | mitogen-activated protein kinase 3                         |
| 7995793 | MT1L            | -1.9568444 | down | metallothionein 1L (gene/pseudogene)                       |
| 7951207 | TMEM123         | -1.9572219 | down | transmembrane protein 123                                  |
| 8118734 | ITPR3           | -1.9577907 | down | inositol 1,4,5-triphosphate receptor, type 3               |
| 8179861 | SLC44A4         | -1.9592842 | down | solute carrier family 44, member 4                         |
| 7907611 | RASAL2          | -1.9627209 | down | RAS protein activator like 2                               |



## Supplemental Table 1b

eMSC vs. eEN

|         |                 |            |      |                                                              |
|---------|-----------------|------------|------|--------------------------------------------------------------|
| 8083429 | MBNL1           | -1.9638655 | down | muscleblind-like (Drosophila)                                |
| 8124901 | HLA-C XXbac-BPG | -1.9648032 | down | major histocompatibility complex, class I, C   MHC class I ; |
| 8179731 | HLA-B HLA-C XXb | -1.9660718 | down | major histocompatibility complex, class I, B   major histoc  |
| 8179019 | HLA-F           | -1.9742519 | down | major histocompatibility complex, class I, F                 |
| 8150036 | KIF13B          | -1.9756317 | down | kinesin family member 13B                                    |
| 8178498 | HLA-B HLA-C XXb | -1.9761314 | down | major histocompatibility complex, class I, B   major histoc  |
| 8177717 | HLA-F           | -1.981226  | down | major histocompatibility complex, class I, F                 |
| 8178489 | HLA-C XXbac-BPG | -1.9823152 | down | major histocompatibility complex, class I, C   MHC class I ; |
| 7921713 | F11R hCG_20857  | -1.9838433 | down | F11 receptor   hypothetical protein LOC100134860   KAT       |
| 8171392 | ASB9            | -1.9860244 | down | ankyrin repeat and SOCS box-containing 9                     |
| 8071981 | CTA-221G9.4     | -1.9863944 | down | KIAA1671 protein                                             |
| 8073662 | PARVB           | -1.9905969 | down | parvin, beta                                                 |
| 7899750 | C1orf90         | -1.990933  | down | chromosome 1 open reading frame 90                           |
| 8171435 | PIR             | -1.9926639 | down | pirin (iron-binding nuclear protein)                         |
| 8079950 | GNAI2           | -1.9939425 | down | guanine nucleotide binding protein (G protein), alpha inhi   |
| 8063382 | SNAI1           | -1.9961467 | down | snail homolog 1 (Drosophila)                                 |
| 7904361 | FAM46C          | -1.9962299 | down | family with sequence similarity 46, member C                 |
| 7905881 | ADAM15          | -1.9969549 | down | ADAM metallopeptidase domain 15                              |
| 7947147 | SVIP            | -1.9997096 | down | small VCP/p97-interacting protein                            |
| 7912347 | CASZ1           | -2.0004125 | down | castor zinc finger 1                                         |
| 8044919 | RALB            | -2.0014856 | down | v-ral simian leukemia viral oncogene homolog B (ras relat    |
| 7995783 | MT2A            | -2.0020185 | down | metallothionein 2A                                           |
| 8117760 | HLA-F           | -2.0052788 | down | major histocompatibility complex, class I, F                 |
| 7906435 | DARC            | -2.009302  | down | Duffy blood group, chemokine receptor                        |
| 8179519 | HLA-DPB1        | -2.010406  | down | major histocompatibility complex, class II, DP beta 1        |
| 8117476 | BTN3A3          | -2.014029  | down | butyrophilin, subfamily 3, member A3                         |
| 8074131 | SHANK3          | -2.017002  | down | SH3 and multiple ankyrin repeat domains 3                    |
| 7926239 | OPTN            | -2.0198624 | down | optineurin                                                   |
| 7997453 | PLCG2           | -2.0199986 | down | phospholipase C, gamma 2 (phosphatidylinositol-specific)     |
| 8111772 | DAB2            | -2.0207956 | down | disabled homolog 2, mitogen-responsive phosphoprotein        |
| 8111569 | RANBP3L         | -2.0245876 | down | RAN binding protein 3-like                                   |
| 7908351 | PLA2G4A         | -2.0257292 | down | phospholipase A2, group IVA (cytosolic, calcium-depende      |
| 7950885 | FZD4            | -2.027854  | down | frizzled homolog 4 (Drosophila)                              |

## Supplemental Table 1b

eMSC vs. eEN

|         |             |            |      |                                                             |
|---------|-------------|------------|------|-------------------------------------------------------------|
| 7931353 | PTPRE       | -2.0311434 | down | protein tyrosine phosphatase, receptor type, E              |
| 8114300 | KLHL3       | -2.031422  | down | kelch-like 3 (Drosophila)                                   |
| 8068202 | C21orf63    | -2.0315776 | down | chromosome 21 open reading frame 63                         |
| 8054766 | bA395L14.13 | -2.0337381 | down | acrosin-like protease                                       |
| 8091306 | PLSCR4      | -2.0377278 | down | phospholipid scramblase 4                                   |
| 8021984 | YES1        | -2.0401661 | down | v-yes-1 Yamaguchi sarcoma viral oncogene homolog 1          |
| 7946245 | DCHS1       | -2.0445886 | down | dachsous 1 (Drosophila)                                     |
| 7912145 | TNFRSF9     | -2.0452473 | down | tumor necrosis factor receptor superfamily, member 9        |
| 7954527 | ARNTL2      | -2.0461125 | down | aryl hydrocarbon receptor nuclear translocator-like 2       |
| 8041995 | SPTBN1      | -2.0482476 | down | spectrin, beta, non-erythrocytic 1                          |
| 7947425 | CD59        | -2.0508275 | down |                                                             |
| 8161774 | TRPM6       | -2.0542078 | down | transient receptor potential cation channel, subfamily M,   |
| 8138941 | NT5C3       | -2.0546234 | down | 5'-nucleotidase, cytosolic III                              |
| 8061247 | RIN2        | -2.0583816 | down | Ras and Rab interactor 2                                    |
| 7967002 | PXN         | -2.0596645 | down | paxillin                                                    |
| 8107909 | SLC22A4     | -2.0601935 | down | solute carrier family 22 (organic cation/ergothioneine trar |
| 7960947 | A2M         | -2.0623772 | down | alpha-2-macroglobulin                                       |
| 7964701 | GNS         | -2.0625126 | down | glucosamine (N-acetyl)-6-sulfatase (Sanfilippo disease IIID |
| 8152041 | RNF19A      | -2.0644841 | down | ring finger protein 19A                                     |
| 8131067 | GPR146      | -2.064635  | down | G protein-coupled receptor 146                              |
| 8010271 | PGS1        | -2.0691762 | down | phosphatidylglycerophosphate synthase 1                     |
| 8155849 | ANXA1       | -2.0703318 | down | annexin A1                                                  |
| 8146550 | SDCBP       | -2.0765612 | down | syndecan binding protein (syntenin)                         |
| 8096899 | C4orf32     | -2.0781617 | down | chromosome 4 open reading frame 32                          |
| 8081590 | PHLDB2      | -2.0803075 | down | pleckstrin homology-like domain, family B, member 2         |
| 8116910 | HIVEP1      | -2.0913043 | down | human immunodeficiency virus type I enhancer binding pr     |
| 8121569 | FLJ34503    | -2.0928137 | down |                                                             |
| 8156043 | PSAT1       | -2.0953033 | down | phosphoserine aminotransferase 1                            |
| 7902104 | PDE4B       | -2.096457  | down | phosphodiesterase 4B, cAMP-specific (phosphodiesterase      |
| 8092905 | LSG1        | -2.0965211 | down | large subunit GTPase 1 homolog (S. cerevisiae)              |
| 8030991 | LOC147804   | -2.096651  | down | tropomyosin 3 pseudogene                                    |
| 7978285 | ADCY4       | -2.0988047 | down | adenylate cyclase 4                                         |
| 7974851 | HIF1A       | -2.0989442 | down | hypoxia-inducible factor 1, alpha subunit (basic helix-loop |

Supplemental Table 1b  
eMSC vs. eEN

|         |                 |            |      |                                                                              |
|---------|-----------------|------------|------|------------------------------------------------------------------------------|
| 8122426 | PHACTR2         | -2.1084702 | down | phosphatase and actin regulator 2                                            |
| 7913582 | ZNF436          | -2.1091151 | down | zinc finger protein 436                                                      |
| 8171297 | MID1            | -2.109329  | down | midline 1 (Opitz/BBB syndrome)                                               |
| 7950933 | NOX4            | -2.118168  | down | NADPH oxidase 4                                                              |
| 7964602 | LRIG3           | -2.1191318 | down | leucine-rich repeats and immunoglobulin-like domains 3                       |
| 8144089 | LMBR1           | -2.1212962 | down | limb region 1 homolog (mouse)                                                |
| 8122634 | SAMD5           | -2.1223485 | down | sterile alpha motif domain containing 5                                      |
| 8066848 | PREX1           | -2.1237369 | down | phosphatidylinositol 3,4,5-trisphosphate-dependent RAC GEF 1                 |
| 8156164 | LOC389765       | -2.1238282 | down | similar to KIF27C                                                            |
| 8095362 | MT2A            | -2.1241052 | down | metallothionein 2A                                                           |
| 7997427 | CMIP            | -2.1252668 | down | c-Maf-inducing protein                                                       |
| 7931097 | HTRA1           | -2.1273148 | down | HtrA serine peptidase 1                                                      |
| 8068583 | KCNJ15          | -2.1349952 | down | potassium inwardly-rectifying channel, subfamily J, member 15                |
| 8005549 | LOC400581       | -2.1357963 | down | GRB2-related adaptor protein-like                                            |
| 7922301 | MYOC            | -2.136149  | down | myocilin, trabecular meshwork inducible glucocorticoid response protein      |
| 8153002 | NDRG1           | -2.137993  | down | N-myc downstream regulated gene 1                                            |
| 7899160 | CD52            | -2.140759  | down |                                                                              |
| 8161701 | TMEM2           | -2.1444192 | down | transmembrane protein 2                                                      |
| 8155630 | LOC100132139 LC | -2.1476436 | down | similar to methylenetetrahydrofolate dehydrogenase (NADPH-dependent)         |
| 7906469 | DUSP23          | -2.1480231 | down | dual specificity phosphatase 23                                              |
| 8129888 | NHSL1           | -2.148069  | down | NHS-like 1                                                                   |
| 7953626 | CLSTN3          | -2.1494777 | down | calsyntenin 3                                                                |
| 8100026 | ATP8A1          | -2.1498435 | down | ATPase, aminophospholipid transporter (APLT), class I, type 8A1              |
| 8161377 | LOC100132139 LC | -2.1498444 | down | similar to methylenetetrahydrofolate dehydrogenase (NADPH-dependent)         |
| 8120279 | LRRC1           | -2.1503584 | down | leucine rich repeat containing 1                                             |
| 7941104 | ARL2 SNX15      | -2.153164  | down | ADP-ribosylation factor-like 2   sorting nexin 15                            |
| 8132725 | UPP1            | -2.1597784 | down | uridine phosphorylase 1                                                      |
| 8080344 | STAB1           | -2.1648612 | down | stabilin 1                                                                   |
| 8101659 | SPARCL1         | -2.1686084 | down | SPARC-like 1 (mast9, hevin)                                                  |
| 8045889 | TANC1           | -2.171945  | down | tetratricopeptide repeat, ankyrin repeat and coiled-coil domain containing 1 |
| 8138689 | SKAP2           | -2.1731439 | down | src kinase associated phosphoprotein 2                                       |
| 7909175 | SRGAP2          | -2.1740468 | down | SLIT-ROBO Rho GTPase activating protein 2                                    |
| 8095376 | TMPRSS11E2 MT2A | -2.1774263 | down | transmembrane protease, serine 11E2   metallothionein 2A                     |

## Supplemental Table 1b

eMSC vs. eEN

|         |                 |            |      |                                                              |
|---------|-----------------|------------|------|--------------------------------------------------------------|
| 8118345 | CFB             | -2.1787791 | down | complement factor B                                          |
| 7919800 | CTSS            | -2.1791697 | down | cathepsin S                                                  |
| 8075569 | SLC5A4          | -2.1799128 | down | solute carrier family 5 (low affinity glucose cotransporter) |
| 8077441 | BHLHB2          | -2.1871212 | down | basic helix-loop-helix domain containing, class B, 2         |
| 8112202 | PLK2            | -2.1874273 | down | polo-like kinase 2 (Drosophila)                              |
| 8017736 | CCDC46          | -2.1880612 | down | coiled-coil domain containing 46                             |
| 7979269 | GCH1            | -2.1911716 | down | GTP cyclohydrolase 1 (dopa-responsive dystonia)              |
| 8155563 | LOC100132139 LC | -2.1915872 | down | similar to methylenetetrahydrofolate dehydrogenase (NA       |
| 7964868 | LOC100131613    | -2.1949747 | down | PRO1454                                                      |
| 8147057 | CHMP4C          | -2.1990993 | down | chromatin modifying protein 4C                               |
| 7902874 | LRRC8C          | -2.199971  | down | leucine rich repeat containing 8 family, member C            |
| 8154128 | DSERG1          | -2.2068121 | down | Down syndrome encephalopathy related protein 1               |
| 8161484 | LOC100132139 LC | -2.2080352 | down | similar to methylenetetrahydrofolate dehydrogenase (NA       |
| 8147777 | CTHRC1          | -2.2089431 | down | collagen triple helix repeat containing 1                    |
| 8025601 | ICAM1           | -2.2121873 | down | intercellular adhesion molecule 1 (CD54), human rhinovirus   |
| 8117890 | HLA-E           | -2.2155726 | down | major histocompatibility complex, class I, E                 |
| 7954090 | EMP1            | -2.2202861 | down | epithelial membrane protein 1                                |
| 8178115 | CFB             | -2.227796  | down | complement factor B                                          |
| 8091991 | MDS1            | -2.2305427 | down | myelodysplasia syndrome 1                                    |
| 8013860 | MYO18A TIAF1    | -2.234655  | down | myosin XVIII A   TGFB1-induced anti-apoptotic factor 1       |
| 7916493 | PPAP2B          | -2.236012  | down | phosphatidic acid phosphatase type 2B                        |
| 8083677 | SCHIP1          | -2.2367234 | down | schwannomin interacting protein 1                            |
| 8103415 | C4orf18         | -2.245341  | down | chromosome 4 open reading frame 18                           |
| 7971813 | THSD1           | -2.2477083 | down | thrombospondin, type I, domain containing 1                  |
| 7970810 | SLC7A1          | -2.2499058 | down | solute carrier family 7 (cationic amino acid transporter, y+ |
| 7989968 | CALML4          | -2.2529054 | down | calmodulin-like 4                                            |
| 8100292 | FRYL            | -2.2535388 | down | FRY-like                                                     |
| 8142468 | TPM3            | -2.2538762 | down | tropomyosin 3                                                |
| 8037614 | GPR4            | -2.2558656 | down | G protein-coupled receptor 4                                 |
| 8160260 | BNC2            | -2.2561665 | down | basonuclin 2                                                 |
| 7953981 | ETV6            | -2.257421  | down | ets variant gene 6 (TEL oncogene)                            |
| 8114780 | PCDH12          | -2.2576447 | down | protocadherin 12                                             |
| 8034021 | CDC37           | -2.258807  | down | cell division cycle 37 homolog (S. cerevisiae)               |

## Supplemental Table 1b

eMSC vs. eEN

|         |          |            |      |                                                            |
|---------|----------|------------|------|------------------------------------------------------------|
| 7968351 | C13orf33 | -2.2670581 | down | chromosome 13 open reading frame 33                        |
| 7982854 | DLL4     | -2.2696671 | down | delta-like 4 (Drosophila)                                  |
| 8046726 | SSFA2    | -2.270983  | down | sperm specific antigen 2                                   |
| 7955562 | ACVRL1   | -2.2726738 | down | activin A receptor type II-like 1                          |
| 7995838 | MT1X     | -2.2730582 | down | metallothionein 1X                                         |
| 8062108 | PROCR    | -2.273338  | down | protein C receptor, endothelial (EPCR)                     |
| 8016476 | HOXB9    | -2.2747726 | down | homeobox B9                                                |
| 8103822 | VEGFC    | -2.2782102 | down | vascular endothelial growth factor C                       |
| 8047069 | INPP1    | -2.2806034 | down | inositol polyphosphate-1-phosphatase                       |
| 8180078 | HLA-DMB  | -2.2812307 | down | major histocompatibility complex, class II, DM beta        |
| 7911038 | ZNF238   | -2.2818167 | down | zinc finger protein 238                                    |
| 7968976 | LRCH1    | -2.2843032 | down | leucine-rich repeats and calponin homology (CH) domain     |
| 8038029 | CARD8    | -2.2860043 | down | caspase recruitment domain family, member 8                |
| 8177788 | HLA-E    | -2.291439  | down | major histocompatibility complex, class I, E               |
| 8179103 | HLA-E    | -2.2916844 | down | major histocompatibility complex, class I, E               |
| 7946815 | PIK3C2A  | -2.2929125 | down | phosphoinositide-3-kinase, class 2, alpha polypeptide      |
| 8103011 | OTUD4    | -2.2973313 | down | OTU domain containing 4                                    |
| 8066214 | TGM2     | -2.2998986 | down | transglutaminase 2 (C polypeptide, protein-glutamine-gan   |
| 8092392 | KLHL6    | -2.300754  | down | kelch-like 6 (Drosophila)                                  |
| 8097513 | MGST2    | -2.311212  | down | microsomal glutathione S-transferase 2                     |
| 8109141 | GRPEL2   | -2.3156438 | down | GrpE-like 2, mitochondrial (E. coli)                       |
| 8047538 | BMPR2    | -2.3158977 | down | bone morphogenetic protein receptor, type II (serine/thre  |
| 7920506 | SHE      | -2.321076  | down | Src homology 2 domain containing E                         |
| 8142345 | DOCK4    | -2.3236127 | down | dedicator of cytokinesis 4                                 |
| 7946641 | GALNTL4  | -2.32458   | down | UDP-N-acetyl-alpha-D-galactosamine:polypeptide N-acety     |
| 8072360 | TCN2     | -2.3268805 | down | transcobalamin II; macrocytic anemia                       |
| 8050719 | ITSN2    | -2.3290324 | down | intersectin 2                                              |
| 8155734 | C9orf61  | -2.3359244 | down | chromosome 9 open reading frame 61                         |
| 8120102 | CD2AP    | -2.340863  | down | CD2-associated protein                                     |
| 8019643 | DOC2B    | -2.343802  | down | double C2-like domains, beta                               |
| 8005847 | TNFAIP1  | -2.34577   | down | tumor necrosis factor, alpha-induced protein 1 (endotheli  |
| 8147156 | WWP1     | -2.3486776 | down | WW domain containing E3 ubiquitin protein ligase 1         |
| 8085914 | SLC4A7   | -2.3512096 | down | solute carrier family 4, sodium bicarbonate cotransporter, |

## Supplemental Table 1b

eMSC vs. eEN

|         |                 |            |      |                                                              |
|---------|-----------------|------------|------|--------------------------------------------------------------|
| 8128683 | SNX3            | -2.3586586 | down | sorting nexin 3                                              |
| 7965510 | TMCC3           | -2.3590076 | down | transmembrane and coiled-coil domain family 3                |
| 7971565 | P2RY5           | -2.3603446 | down | purinergic receptor P2Y, G-protein coupled, 5                |
| 8132118 | AQP1            | -2.3621838 | down | aquaporin 1 (Colton blood group)                             |
| 8148049 | NOV             | -2.362347  | down | nephroblastoma overexpressed gene                            |
| 8135363 | PIK3CG          | -2.363151  | down | phosphoinositide-3-kinase, catalytic, gamma polypeptide      |
| 7905929 | EFNA1           | -2.364324  | down | ephrin-A1                                                    |
| 7966026 | NUAK1           | -2.3656402 | down | NUAK family, SNF1-like kinase, 1                             |
| 8096224 | AFF1            | -2.3660588 | down | AF4/FMR2 family, member 1                                    |
| 7970162 | ATP11A          | -2.369622  | down | ATPase, class VI, type 11A                                   |
| 7928046 | TSPAN15         | -2.3727102 | down | tetraspanin 15                                               |
| 7975799 | FLVCR2          | -2.374445  | down | feline leukemia virus subgroup C cellular receptor family, I |
| 7917338 | BCL10           | -2.3766942 | down | B-cell CLL/lymphoma 10                                       |
| 7897522 | RBP7            | -2.3772848 | down | retinol binding protein 7, cellular                          |
| 7962250 | CPNE8           | -2.3782368 | down | copine VIII                                                  |
| 7932118 | C10orf30        | -2.383448  | down | chromosome 10 open reading frame 30                          |
| 8127756 | LCA5            | -2.383725  | down | Leber congenital amaurosis 5                                 |
| 8116835 | GCNT2           | -2.3854656 | down | glucosaminyl (N-acetyl) transferase 2, I-branching enzyme    |
| 7956819 | RASSF3          | -2.3916118 | down | Ras association (RalGDS/AF-6) domain family member 3         |
| 8094501 | STIM2           | -2.3924108 | down | stromal interaction molecule 2                               |
| 7995787 | MT1M            | -2.3959389 | down | metallothionein 1M                                           |
| 8125530 | HLA-DMB         | -2.3961673 | down | major histocompatibility complex, class II, DM beta          |
| 8005809 | LGALS9          | -2.4024265 | down | lectin, galactoside-binding, soluble, 9 (galectin 9)         |
| 8017843 | SLC16A6         | -2.4047377 | down | solute carrier family 16, member 6 (monocarboxylic acid t    |
| 8130556 | SOD2            | -2.40986   | down | superoxide dismutase 2, mitochondrial                        |
| 8156783 | COL15A1         | -2.4147584 | down | collagen, type XV, alpha 1                                   |
| 8006433 | CCL2            | -2.418339  | down | chemokine (C-C motif) ligand 2                               |
| 8178220 | HLA-DPB1        | -2.4264352 | down | major histocompatibility complex, class II, DP beta 1        |
| 8059878 | IQCA LOC1001292 | -2.4352083 | down | IQ motif containing with AAA domain   hypothetical prote     |
| 7963786 | ITGA5           | -2.4448385 | down | integrin, alpha 5 (fibronectin receptor, alpha polypeptide)  |
| 8068593 | ETS2            | -2.445321  | down | v-ets erythroblastosis virus E26 oncogene homolog 2 (avia    |
| 8118571 | PSMB9           | -2.447998  | down | proteasome (prosome, macropain) subunit, beta type, 9 (I     |
| 8178211 | PSMB9           | -2.449383  | down | proteasome (prosome, macropain) subunit, beta type, 9 (I     |

## Supplemental Table 1b

eMSC vs. eEN

|         |                 |            |      |                                                                |
|---------|-----------------|------------|------|----------------------------------------------------------------|
| 8179495 | PSMB9           | -2.4510891 | down | proteasome (prosome, macropain) subunit, beta type, 9 (l       |
| 7989023 | RAB27A          | -2.4583023 | down |                                                                |
| 8162531 | MT1G            | -2.462651  | down | metallothionein 1G                                             |
| 8068671 | BACE2           | -2.4657497 | down | beta-site APP-cleaving enzyme 2                                |
| 8005458 | LGALS9 LOC65434 | -2.467741  | down | lectin, galactoside-binding, soluble, 9 (galectin 9)   similar |
| 7946275 | GVIN1           | -2.4746363 | down | GTPase, very large interferon inducible 1                      |
| 7977397 | CRIP2           | -2.4768696 | down | cysteine-rich protein 2                                        |
| 8017651 | SMURF2          | -2.480326  | down | SMAD specific E3 ubiquitin protein ligase 2                    |
| 8013319 | GRAP            | -2.4809217 | down | GRB2-related adaptor protein                                   |
| 7931081 | PLEKHA1         | -2.4823859 | down | pleckstrin homology domain containing, family A (phosph        |
| 8008629 | DGKE            | -2.4840431 | down | diacylglycerol kinase, epsilon 64kDa                           |
| 8100298 | OCIAD2          | -2.486476  | down | OCIA domain containing 2                                       |
| 8096489 | PDLIM5          | -2.487946  | down | PDZ and LIM domain 5                                           |
| 8044391 | MERTK           | -2.490656  | down | c-mer proto-oncogene tyrosine kinase                           |
| 8065353 | THBD            | -2.4927254 | down | thrombomodulin                                                 |
| 8116932 | PHACTR1         | -2.4985461 | down | phosphatase and actin regulator 1                              |
| 7951271 | MMP1            | -2.5061712 | down | matrix metalloproteinase 1 (interstitial collagenase)          |
| 8027604 | KIAA0355        | -2.5070975 | down |                                                                |
| 8078933 | MYRIP           | -2.509987  | down | myosin VIIA and Rab interacting protein                        |
| 8057377 | CCDC141 LOC2851 | -2.5166705 | down | coiled-coil domain containing 141   hypothetical protein L     |
| 8088680 | C3orf64         | -2.5240605 | down | chromosome 3 open reading frame 64                             |
| 7932826 | KIAA1462        | -2.5243437 | down |                                                                |
| 8123598 | SERPINB1        | -2.5339117 | down | serpin peptidase inhibitor, clade B (ovalbumin), member 1      |
| 8004842 | ARHGEF15        | -2.5347714 | down | Rho guanine nucleotide exchange factor (GEF) 15                |
| 8049544 | LRRFIP1         | -2.5379808 | down | leucine rich repeat (in FLII) interacting protein 1            |
| 8172698 | SHROOM4         | -2.541502  | down | shroom family member 4                                         |
| 8169580 | IL13RA1         | -2.546253  | down | interleukin 13 receptor, alpha 1                               |
| 7952436 | ESAM            | -2.548009  | down | endothelial cell adhesion molecule                             |
| 8022572 | OSBPL1A         | -2.554022  | down | oxysterol binding protein-like 1A                              |
| 8085556 | SH3BP5          | -2.5543635 | down | SH3-domain binding protein 5 (BTK-associated)                  |
| 8059279 | EPHA4           | -2.559454  | down | EPH receptor A4                                                |
| 8112980 | EDIL3           | -2.5600224 | down | EGF-like repeats and discoidin I-like domains 3                |
| 8098500 | CDKN2AIP        | -2.5608072 | down | CDKN2A interacting protein                                     |

## Supplemental Table 1b

eMSC vs. eEN

|         |                 |            |      |                                                              |
|---------|-----------------|------------|------|--------------------------------------------------------------|
| 8161255 | SHB CKAP2       | -2.5651212 | down | Src homology 2 domain containing adaptor protein B   cy      |
| 8149590 | LOC100130604    | -2.568488  | down |                                                              |
| 8081219 | ST3GAL6         | -2.5700672 | down | ST3 beta-galactoside alpha-2,3-sialyltransferase 6           |
| 8101675 | ABCG2           | -2.5734742 | down | ATP-binding cassette, sub-family G (WHITE), member 2         |
| 8017210 | AP1S2 LOC653653 | -2.5767376 | down | adaptor-related protein complex 1, sigma 2 subunit   hyp     |
| 7899534 | EPB41           | -2.5814118 | down | erythrocyte membrane protein band 4.1 (elliptocytosis 1,     |
| 8057797 | SDPR            | -2.583046  | down | serum deprivation response (phosphatidylserine binding p     |
| 8099721 | KIAA0746 SERINC | -2.58779   | down | KIAA0746 protein   serine incorporator 2                     |
| 7908204 | HMCN1           | -2.5936563 | down | hemicentin 1                                                 |
| 8004691 | TMEM88          | -2.5965676 | down | transmembrane protein 88                                     |
| 8154512 | ADAMTSL1        | -2.601246  | down | ADAMTS-like 1                                                |
| 8121277 | AIM1            | -2.6020453 | down | absent in melanoma 1                                         |
| 8123609 | SERPINB9        | -2.614807  | down | serpin peptidase inhibitor, clade B (ovalbumin), member 9    |
| 7932243 | C10orf38        | -2.6149018 | down | chromosome 10 open reading frame 38                          |
| 8010139 | SEC14L1         | -2.6251    | down | SEC14-like 1 ( <i>S. cerevisiae</i> )                        |
| 8143781 | GIMAP6          | -2.6399448 | down | GTPase, IMAP family member 6                                 |
| 8109001 | SPINK5          | -2.6419675 | down | serine peptidase inhibitor, Kazal type 5                     |
| 8163063 | CTNNA1          | -2.6469383 | down | catenin (cadherin-associated protein), alpha-like 1          |
| 8101992 | SLC39A8         | -2.659488  | down | solute carrier family 39 (zinc transporter), member 8        |
| 8102362 | TIFA            | -2.6603432 | down | TRAF-interacting protein with forkhead-associated domain     |
| 8118111 | HCP5            | -2.6644063 | down | HLA complex P5                                               |
| 7909862 | C1orf115        | -2.6879656 | down | chromosome 1 open reading frame 115                          |
| 7942830 | LOC100130425 G  | -2.688963  | down | hypothetical protein LOC100130425   GCRG-P224                |
| 7929525 | LOC100127889    | -2.694704  | down |                                                              |
| 8098611 | TLR3            | -2.7011003 | down | toll-like receptor 3                                         |
| 8056285 | IFIH1           | -2.7013476 | down | interferon induced with helicase C domain 1                  |
| 7966150 | SSH1            | -2.7015994 | down | slingshot homolog 1 ( <i>Drosophila</i> )                    |
| 8116818 | BMP6            | -2.7022324 | down | bone morphogenetic protein 6                                 |
| 8126853 | C6orf138        | -2.712691  | down | chromosome 6 open reading frame 138                          |
| 7987385 | MEIS2           | -2.716001  | down | Meis homeobox 2                                              |
| 8091546 | LOC645843       | -2.7163482 | down | transmembrane protein 14-like                                |
| 7996081 | GPR56           | -2.7318473 | down | G protein-coupled receptor 56                                |
| 8068713 | MX1             | -2.736461  | down | myxovirus (influenza virus) resistance 1, interferon-inducil |



## Supplemental Table 1b

eMSC vs. eEN

|         |                 |            |      |                                                                 |
|---------|-----------------|------------|------|-----------------------------------------------------------------|
| 7914270 | LAPTM5          | -2.7438958 | down | lysosomal associated multispinning membrane protein 5           |
| 8023401 | CCDC68          | -2.7482464 | down | coiled-coil domain containing 68                                |
| 7995797 | MT1E            | -2.7513907 | down | metallothionein 1E                                              |
| 8089911 | HCLS1           | -2.7607174 | down | hematopoietic cell-specific Lyn substrate 1                     |
| 7978376 | STXBP6          | -2.764527  | down | syntaxin binding protein 6 (amisyn)                             |
| 8104035 | SORBS2          | -2.7659628 | down | sorbin and SH3 domain containing 2                              |
| 8152812 | FAM84B          | -2.770951  | down | family with sequence similarity 84, member B                    |
| 8149749 | TNFRSF10D       | -2.7731352 | down | tumor necrosis factor receptor superfamily, member 10d,         |
| 7954589 | REP15           | -2.7751791 | down | Rab15 effector protein                                          |
| 7984517 | GLCE            | -2.7773478 | down | glucuronic acid epimerase                                       |
| 8057056 | TTN             | -2.7882695 | down | titin                                                           |
| 8004255 | BCL6B           | -2.7913487 | down | B-cell CLL/lymphoma 6, member B (zinc finger protein)           |
| 8176174 | MPP1            | -2.7913756 | down | membrane protein, palmitoylated 1, 55kDa                        |
| 8013450 | LGALS9 LOC28419 | -2.7934666 | down | lectin, galactoside-binding, soluble, 9 (galectin 9)   galectin |
| 7957665 | ELK3            | -2.7967777 | down |                                                                 |
| 7965652 | PCK2            | -2.7987628 | down | PCK2 protein kinase 2                                           |
| 8015412 | JUP             | -2.8166823 | down | junction plakoglobin                                            |
| 7938370 | SWAP70          | -2.8174195 | down | SWAP-70 protein                                                 |
| 7909586 | PPP2R5A         | -2.819637  | down | protein phosphatase 2, regulatory subunit B', alpha isoform     |
| 7943749 | LAYN            | -2.819756  | down | layilin                                                         |
| 8094874 | LOC402175       | -2.8387756 | down | hypothetical gene supported by AF044957; NM_004547              |
| 8056963 | LOC100129455    | -2.8430746 | down |                                                                 |
| 7923991 | PLXNA2          | -2.8511355 | down | plexin A2                                                       |
| 7922976 | PTGS2           | -2.8607323 | down | prostaglandin-endoperoxide synthase 2 (prostaglandin G/         |
| 8046380 | ITGA6           | -2.861708  | down | integrin, alpha 6                                               |
| 8008819 | YPEL2           | -2.8658538 | down | yippee-like 2 (Drosophila)                                      |
| 7951351 | PDGFD           | -2.8681054 | down | platelet derived growth factor D                                |
| 8081890 | PLA1A           | -2.8808503 | down | phospholipase A1 member A                                       |
| 8114287 | SPOCK1          | -2.8825104 | down | sparc/osteonectin, cwcv and kazal-like domains proteogly        |
| 7972936 | FAM70B          | -2.8854764 | down | family with sequence similarity 70, member B                    |
| 8125537 | HLA-DMA         | -2.8929305 | down | major histocompatibility complex, class II, DM alpha            |
| 7903358 | VCAM1           | -2.8930495 | down | vascular cell adhesion molecule 1                               |
| 8131631 | HDAC9           | -2.896059  | down | histone deacetylase 9                                           |

## Supplemental Table 1b

eMSC vs. eEN

|         |           |            |      |                                                                |
|---------|-----------|------------|------|----------------------------------------------------------------|
| 7977592 | GAFA1     | -2.9005466 | down |                                                                |
| 8046542 | HOXD9     | -2.9093482 | down | homeobox D9                                                    |
| 8126798 | GPR116    | -2.9141605 | down | G protein-coupled receptor 116                                 |
| 8042038 | RPL23AP13 | -2.9203565 | down | ribosomal protein L23a pseudogene 13                           |
| 7943413 | BIRC3     | -2.9219713 | down | baculoviral IAP repeat-containing 3                            |
| 7902541 | IFI44L    | -2.9240522 | down | interferon-induced protein 44-like                             |
| 7926679 | KIAA1217  | -2.9247892 | down |                                                                |
| 8008588 | HLF       | -2.9249659 | down | hepatic leukemia factor                                        |
| 8068024 | JAM2      | -2.9317975 | down | junctional adhesion molecule 2                                 |
| 7928534 | C10orf11  | -2.9334114 | down | chromosome 10 open reading frame 11                            |
| 8103789 | GPM6A     | -2.9639132 | down | glycoprotein M6A                                               |
| 8120719 | CD109     | -2.9776137 | down |                                                                |
| 8044212 | SULT1C2   | -2.9923956 | down | sulfotransferase family, cytosolic, 1C, member 2               |
| 7948987 | HRASLS3   | -2.9975982 | down | HRAS-like suppressor 3                                         |
| 8131600 | TSPAN13   | -3.0001168 | down | tetraspanin 13                                                 |
| 7954559 | PPFIBP1   | -3.0138135 | down | PTPRF interacting protein, binding protein 1 (liprin beta 1)   |
| 8105077 | CARD6     | -3.01769   | down | caspace recruitment domain family, member 6                    |
| 7974902 | RHOJ      | -3.0221555 | down | ras homolog gene family, member J                              |
| 8117243 | LRRC16A   | -3.0250976 | down | leucine rich repeat containing 16A                             |
| 8154135 | SLC1A1    | -3.031714  | down | solute carrier family 1 (neuronal/epithelial high affinity gli |
| 8178884 | HLA-DMA   | -3.0432706 | down | major histocompatibility complex, class II, DM alpha           |
| 8120833 | SH3BGR2   | -3.089729  | down | SH3 domain binding glutamic acid-rich protein like 2           |
| 8180086 | HLA-DMA   | -3.095259  | down | major histocompatibility complex, class II, DM alpha           |
| 8018922 | PSCD1     | -3.1054957 | down | pleckstrin homology, Sec7 and coiled-coil domains 1(cytop      |
| 7931108 | DMBT1     | -3.1086972 | down | deleted in malignant brain tumors 1                            |
| 7962516 | SLC38A1   | -3.1089463 | down | solute carrier family 38, member 1                             |
| 7900365 | MFSD2     | -3.127522  | down | major facilitator superfamily domain containing 2              |
| 8135601 | MET       | -3.1355996 | down | met proto-oncogene (hepatocyte growth factor receptor)         |
| 7938951 | TMEM16E   | -3.1363716 | down | transmembrane protein 16E                                      |
| 8027778 | FXSD5     | -3.1506348 | down | FXSD domain containing ion transport regulator 5               |
| 7922200 | SELP      | -3.1519907 | down | selectin P (granule membrane protein 140kDa, antigen CD        |
| 8140971 | SAMD9L    | -3.1563816 | down | sterile alpha motif domain containing 9-like                   |
| 8056113 | LY75      | -3.176074  | down | lymphocyte antigen 75                                          |

## Supplemental Table 1b

eMSC vs. eEN

|         |                 |            |      |                                                            |
|---------|-----------------|------------|------|------------------------------------------------------------|
| 8116780 | DSP             | -3.1776173 | down | desmoplakin                                                |
| 8036710 | GMFG            | -3.1863427 | down | glia maturation factor, gamma                              |
| 8055702 | NMI             | -3.2024295 | down | N-myc (and STAT) interactor                                |
| 7951485 | SLC35F2         | -3.2266781 | down | solute carrier family 35, member F2                        |
| 7902957 | ABHD7           | -3.2410777 | down | abhydrolase domain containing 7                            |
| 7961365 | MANSC1          | -3.246564  | down | MANSC domain containing 1                                  |
| 7923662 | PIK3C2B         | -3.27398   | down | phosphoinositide-3-kinase, class 2, beta polypeptide       |
| 8125436 | HLA-DRB5 LOC100 | -3.279343  | down |                                                            |
| 8137257 | GIMAP5          | -3.2835224 | down | GTPase, IMAP family member 5                               |
| 8017597 | hCG_1793136     | -3.2898793 | down | similar to ribosomal protein L31                           |
| 8155460 | CNTNAP3 CNTNAI  | -3.3109338 | down | contactin associated protein-like 3   contactin associated |
| 8090823 | SLCO2A1         | -3.3221736 | down | solute carrier organic anion transporter family, member 2  |
| 8106660 | RASGRF2         | -3.3242693 | down | Ras protein-specific guanine nucleotide-releasing factor 2 |
| 8123407 | MLLT4           | -3.3402631 | down | myeloid/lymphoid or mixed-lineage leukemia (trithorax ho   |
| 7981460 | PPP1R13B        | -3.346441  | down | protein phosphatase 1, regulatory (inhibitor) subunit 13B  |
| 7931951 | SFMBT2          | -3.350499  | down | Scm-like with four mbt domains 2                           |
| 7962884 | RND1            | -3.3535151 | down | Rho family GTPase 1                                        |
| 7950731 | PRCP            | -3.357019  | down | prolylcarboxypeptidase (angiotensinase C)                  |
| 7995907 | CETP            | -3.3652    | down | cholesteryl ester transfer protein, plasma                 |
| 8077198 | FLJ43315        | -3.369711  | down | similar to Asparagine synthetase [glutamine-hydrolyzing]   |
| 8114920 | DPYSL3          | -3.3755457 | down | dihydropyrimidinase-like 3                                 |
| 7952453 | ROBO4           | -3.3990786 | down | roundabout homolog 4, magic roundabout (Drosophila)        |
| 8072603 | LOC100130269    | -3.4046621 | down | similar to Putative uncharacterized protein FLJ36925       |
| 7956826 | TBC1D30         | -3.412396  | down | TBC1 domain family, member 30                              |
| 8054479 | MALL            | -3.4199579 | down | mal, T-cell differentiation protein-like                   |
| 7961083 | CLEC2B          | -3.4326077 | down | C-type lectin domain family 2, member B                    |
| 7929533 | CC2D2B LOC1001  | -3.4334254 | down | coiled-coil and C2 domain containing 2B   hypothetical pr  |
| 7930498 | ACSL5           | -3.4459257 | down | acyl-CoA synthetase long-chain family member 5             |
| 8117106 | RNF144B         | -3.4526875 | down | ring finger 144B                                           |
| 8113512 | EPB41L4A        | -3.4557774 | down | erythrocyte membrane protein band 4.1 like 4A              |
| 8149574 | CSGALNACT1      | -3.470915  | down | chondroitin sulfate N-acetylgalactosaminyltransferase 1    |
| 8105267 | ITGA2           | -3.4775977 | down | integrin, alpha 2 (CD49B, alpha 2 subunit of VLA-2 receptc |
| 8161288 | CNTNAP3 CNTNAI  | -3.4799685 | down | contactin associated protein-like 3   contactin associated |

## Supplemental Table 1b

eMSC vs. eEN

|         |          |            |      |                                                           |
|---------|----------|------------|------|-----------------------------------------------------------|
| 8078066 | FGD5     | -3.487363  | down | FYVE, RhoGEF and PH domain containing 5                   |
| 8091422 | WWTR1    | -3.493544  | down | WW domain containing transcription regulator 1            |
| 8077490 | LMCD1    | -3.5015512 | down | LIM and cysteine-rich domains 1                           |
| 7931977 | ITIH5    | -3.513102  | down | inter-alpha (globulin) inhibitor H5                       |
| 8122865 | VIP      | -3.5211146 | down | vasoactive intestinal peptide                             |
| 7980828 | CCDC88C  | -3.5278249 | down | coiled-coil domain containing 88C                         |
| 7953924 | CLEC9A   | -3.5357192 | down | C-type lectin domain family 9, member A                   |
| 8084206 | B3GNT5   | -3.5358236 | down | UDP-GlcNAc:betaGal beta-1,3-N-acetylglucosaminyltransf    |
| 8091715 | LXN      | -3.5612378 | down | latexin                                                   |
| 8045736 | FMNL2    | -3.5820565 | down | formin-like 2                                             |
| 8113358 | ST8SIA4  | -3.6175914 | down | ST8 alpha-N-acetyl-neuraminide alpha-2,8-sialyltransferas |
| 7900658 | TIE1     | -3.6203213 | down | tyrosine kinase with immunoglobulin-like and EGF-like doi |
| 8072735 | APOL1    | -3.634522  | down | apolipoprotein L, 1                                       |
| 8101762 | SNCA     | -3.6376333 | down | synuclein, alpha (non A4 component of amyloid precursor   |
| 8150962 | TOX      | -3.6435063 | down | thymocyte selection-associated high mobility group box    |
| 8017547 | ICAM2    | -3.645055  | down | intercellular adhesion molecule 2                         |
| 7965335 | DUSP6    | -3.6658652 | down | dual specificity phosphatase 6                            |
| 8116921 | EDN1     | -3.7084222 | down | endothelin 1                                              |
| 8049246 | INPP5D   | -3.7158365 | down | inositol polyphosphate-5-phosphatase, 145kDa              |
| 8094789 | LIMCH1   | -3.7161841 | down | LIM and calponin homology domains 1                       |
| 7913450 | HSPG2    | -3.7180116 | down | heparan sulfate proteoglycan 2                            |
| 8047174 | SLC39A10 | -3.7321298 | down | solute carrier family 39 (zinc transporter), member 10    |
| 8137250 | GIMAP2   | -3.7356057 | down | GTPase, IMAP family member 2                              |
| 7954436 | LRMP     | -3.7365575 | down | lymphoid-restricted membrane protein                      |
| 8081838 | CDGAP    | -3.751342  | down | Cdc42 GTPase-activating protein                           |
| 8115368 | NMUR2    | -3.7525818 | down | neuromedin U receptor 2                                   |
| 8060854 | PLCB1    | -3.7615845 | down | phospholipase C, beta 1 (phosphoinositide-specific)       |
| 8146930 | TMEM70   | -3.784707  | down | transmembrane protein 70                                  |
| 8134257 | GNG11    | -3.794621  | down | guanine nucleotide binding protein (G protein), gamma 11  |
| 7939559 | TSPAN18  | -3.7962637 | down | tetraspanin 18                                            |
| 8152845 | FAM49B   | -3.8024054 | down | family with sequence similarity 49, member B              |
| 8109120 | AFAP1L1  | -3.8328128 | down | actin filament associated protein 1-like 1                |
| 7995697 | LPCAT2   | -3.8877745 | down | lysophosphatidylcholine acyltransferase 2                 |

## Supplemental Table 1b

eMSC vs. eEN

|         |                    |            |      |                                                                                        |
|---------|--------------------|------------|------|----------------------------------------------------------------------------------------|
| 8084717 | ST6GAL1            | -3.8991926 | down | ST6 beta-galactosamide alpha-2,6-sialyltransferase 1                                   |
| 8138202 | ICA1               | -3.9053783 | down | islet cell autoantigen 1, 69kDa                                                        |
| 8088602 | MAG11              | -3.9147289 | down | membrane associated guanylate kinase, WW and PDZ domain containing                     |
| 8035297 | PLVAP              | -3.9365702 | down | plasmalemma vesicle associated protein                                                 |
| 8059642 | SLC16A14           | -3.937859  | down | solute carrier family 16, member 14 (monocarboxylic acid transporter)                  |
| 7917649 | TGFBR3             | -3.953298  | down | transforming growth factor, beta receptor III                                          |
| 7926451 | MRC1 MRC1L1        | -3.973078  | down | mannose receptor, C type 1   mannose receptor, C type 1                                |
| 7926410 | MRC1 MRC1L1        | -3.9821346 | down | mannose receptor, C type 1   mannose receptor, C type 1                                |
| 7903893 | CD53               | -3.9987574 | down | mannose receptor, C type 1                                                             |
| 7983890 | Gcom1 GRINL1A      | -3.9998586 | down | GRINL1A combined protein   glutamate receptor, ionotropic, NR1                         |
| 7929288 | EXOC6              | -4.0231204 | down | exocyst complex component 6                                                            |
| 7902553 | IFI44              | -4.0535436 | down | interferon-induced protein 44                                                          |
| 8112584 | ZNF366             | -4.05959   | down | zinc finger protein 366                                                                |
| 7951397 | CASP1              | -4.0861797 | down | caspace 1, apoptosis-related cysteine peptidase (interleukin-1 beta converting enzyme) |
| 7925929 | AKR1C3             | -4.0947514 | down | aldo-keto reductase family 1, member C3 (3-alpha hydroxysteroid oxidoreductase)        |
| 8165752 | IL3RA              | -4.0977516 | down | interleukin 3 receptor, alpha (low affinity)                                           |
| 8115261 | CCDC69             | -4.1000886 | down | coiled-coil domain containing 69                                                       |
| 8176323 | IL3RA              | -4.103104  | down | interleukin 3 receptor, alpha (low affinity)                                           |
| 8129458 | ARHGAP18           | -4.118102  | down | Rho GTPase activating protein 18                                                       |
| 8161460 | CNTNAP3B LOC388073 | -4.1331043 | down | contactin associated protein-like 3B   similar to KIAA1714                             |
| 8014349 | CCL14 CCL15        | -4.140202  | down | chemokine (C-C motif) ligand 14   chemokine (C-C motif) ligand 15                      |
| 7902518 | GIPC2              | -4.1404457 | down | GIPC PDZ domain containing family, member 2                                            |
| 8155540 | CNTNAP3B LOC388073 | -4.155564  | down | contactin associated protein-like 3B   similar to KIAA1714                             |
| 8154295 | IL33               | -4.2147446 | down | interleukin 33                                                                         |
| 8121838 | TPD52L1            | -4.215379  | down | tumor protein D52-like 1                                                               |
| 8020806 | RNF125             | -4.243045  | down | ring finger protein 125                                                                |
| 8098214 | TLL1               | -4.270635  | down | tolloid-like 1                                                                         |
| 8044225 | SULT1C4            | -4.311217  | down | sulfotransferase family, cytosolic, 1C, member 4                                       |
| 8113761 | ZNF608             | -4.3192883 | down | zinc finger protein 608                                                                |
| 8113130 | MCTP1              | -4.334962  | down | multiple C2 domains, transmembrane 1                                                   |
| 8168622 | KLHL4              | -4.366471  | down | kelch-like 4 (Drosophila)                                                              |
| 8054135 | MGAT4A             | -4.372516  | down | mannosyl (alpha-1,3-)-glycoprotein beta-1,4-N-acetylglucosaminyltransferase IV         |
| 7936463 | ABLIM1             | -4.396777  | down | actin binding LIM protein 1                                                            |

## Supplemental Table 1b

eMSC vs. eEN

|         |             |            |      |                                                            |
|---------|-------------|------------|------|------------------------------------------------------------|
| 7903393 | S1PR1       | -4.3985214 | down | sphingosine-1-phosphate receptor 1                         |
| 7951408 | COP1        | -4.4117446 | down | caspase-1 dominant-negative inhibitor pseudo-ICE           |
| 7987772 | EHD4        | -4.412446  | down | EH-domain containing 4                                     |
| 8099524 | LDB2        | -4.422633  | down | LIM domain binding 2                                       |
| 7973067 | NP          | -4.429946  | down | nucleoside phosphorylase                                   |
| 8105579 | IPO11       | -4.4590654 | down | importin 11                                                |
| 8045860 | PKP4        | -4.5206356 | down | plakophilin 4                                              |
| 8057578 | CALCRL      | -4.529574  | down | calcitonin receptor-like                                   |
| 8083494 | MME         | -4.554014  | down | membrane metallo-endopeptidase                             |
| 8166784 | TSPAN7      | -4.560778  | down | tetraspanin 7                                              |
| 7956878 | IRAK3       | -4.561345  | down | interleukin-1 receptor-associated kinase 3                 |
| 8121861 | NCOA7       | -4.5617485 | down | nuclear receptor coactivator 7                             |
| 8111739 | FYB         | -4.566675  | down |                                                            |
| 8139656 | GRB10       | -4.6122403 | down | growth factor receptor-bound protein 10                    |
| 7952046 | MPZL2       | -4.6192384 | down | myelin protein zero-like 2                                 |
| 7919139 | LOC375010   | -4.633295  | down |                                                            |
| 8088247 | ARHGEF3     | -4.6447754 | down | Rho guanine nucleotide exchange factor (GEF) 3             |
| 8121749 | GJA1        | -4.6957946 | down | gap junction protein, alpha 1, 43kDa                       |
| 8124307 | CMAH        | -4.6963377 | down | cytidine monophosphate-N-acetylneuraminic acid hydroxylase |
| 8035304 | BST2        | -4.7800074 | down | bone marrow stromal cell antigen 2                         |
| 8047403 | CASP10      | -4.807096  | down | caspase 10, apoptosis-related cysteine peptidase           |
| 8123739 | NRN1        | -4.869575  | down | neuritin 1                                                 |
| 8113073 | ARRDC3      | -4.922471  | down | arrestin domain containing 3                               |
| 8033362 | INSR        | -4.939718  | down | insulin receptor                                           |
| 8085774 | ZNF385D     | -4.974954  | down | zinc finger protein 385D                                   |
| 8146579 | CHD7        | -5.0046177 | down | chromodomain helicase DNA binding protein 7                |
| 8152764 | MTSS1       | -5.0218368 | down | metastasis suppressor 1                                    |
| 8146934 | LY96        | -5.053695  | down | lymphocyte antigen 96                                      |
| 7976443 | IFI27       | -5.0689793 | down | interferon, alpha-inducible protein 27                     |
| 8111677 | LIFR        | -5.069694  | down | leukemia inhibitory factor receptor alpha                  |
| 8130422 | CNKSR3      | -5.1068296 | down | CNKSR family member 3                                      |
| 7951363 | CASP12      | -5.1618404 | down | caspase 12 (gene/pseudogene)                               |
| 7902074 | LEPR LEPROT | -5.1667976 | down | leptin receptor   leptin receptor overlapping transcript   |

## Supplemental Table 1b

eMSC vs. eEN

|         |                |            |      |                                                             |
|---------|----------------|------------|------|-------------------------------------------------------------|
| 7907370 | DNM3           | -5.1676836 | down | dynamain 3                                                  |
| 8019988 | PTPRM          | -5.169024  | down | protein tyrosine phosphatase, receptor type, M              |
| 8137240 | GIMAP7         | -5.2458243 | down | GTPase, IMAP family member 7                                |
| 8138805 | CPVL           | -5.2950172 | down | carboxypeptidase, vitellogenic-like                         |
| 7929511 | ENTPD1         | -5.319108  | down | ectonucleoside triphosphate diphosphohydrolase 1            |
| 8122756 | PLEKHG1        | -5.368209  | down | pleckstrin homology domain containing, family G (with Rh    |
| 7961111 | CLEC1A         | -5.3768215 | down | C-type lectin domain family 1, member A                     |
| 8022118 | EPB41L3        | -5.3788414 | down | erythrocyte membrane protein band 4.1-like 3                |
| 7917561 | GBP4           | -5.4191523 | down | guanylate binding protein 4                                 |
| 7922846 | FAM129A        | -5.424107  | down | family with sequence similarity 129, member A               |
| 8122365 | GPR126         | -5.4352508 | down | G protein-coupled receptor 126                              |
| 8149825 | STC1           | -5.4536867 | down | stanniocalcin 1                                             |
| 8080714 | FLNB           | -5.518477  | down | filamin B, beta (actin binding protein 278)                 |
| 8137232 | GIMAP8         | -5.5434017 | down | GTPase, IMAP family member 8                                |
| 8164269 | ENG            | -5.578701  | down | endoglin (Osler-Rendu-Weber syndrome 1)                     |
| 7920291 | S100A16        | -5.5837064 | down | S100 calcium binding protein A16                            |
| 7929536 | CC2D2B LOC1001 | -5.6165953 | down | coiled-coil and C2 domain containing 2B   hypothetical pr   |
| 8174141 | BEX5           | -5.652138  | down | BEX family member 5                                         |
| 8152522 | ENPP2          | -5.6771207 | down | ectonucleotide pyrophosphatase/phosphodiesterase 2 (a       |
| 7969330 | PCDH17         | -5.681745  | down | protocadherin 17                                            |
| 7948167 | AGTRL1         | -5.6838984 | down | angiotensin II receptor-like 1                              |
| 8125556 | HLA-DPA1       | -5.773095  | down | major histocompatibility complex, class II, DP alpha 1      |
| 7960764 | RBP5           | -5.781648  | down | retinol binding protein 5, cellular                         |
| 8178891 | HLA-DPA1       | -5.7834697 | down | major histocompatibility complex, class II, DP alpha 1      |
| 8042637 | DYSF           | -5.848723  | down | dysferlin, limb girdle muscular dystrophy 2B (autosomal r   |
| 7970763 | FLT1           | -5.9150805 | down | fms-related tyrosine kinase 1 (vascular endothelial growthf |
| 8180100 | HLA-DPA1       | -5.954198  | down | major histocompatibility complex, class II, DP alpha 1      |
| 7972487 | DOCK9          | -6.1125836 | down | dedicator of cytokinesis 9                                  |
| 8097657 | SMAD1          | -6.169971  | down | SMAD family member 1                                        |
| 7909681 | PROX1          | -6.2999053 | down | prospero homeobox 1                                         |
| 7953873 | OVOS2          | -6.4178295 | down | ovostatin 2                                                 |
| 8115734 | LCP2           | -6.4834805 | down | lymphocyte cytosolic protein 2 (SH2 domain containing le    |
| 8002778 | MLKL           | -6.5038414 | down | mixed lineage kinase domain-like                            |

## Supplemental Table 1b

eMSC vs. eEN

|         |                 |            |      |                                                             |
|---------|-----------------|------------|------|-------------------------------------------------------------|
| 8139057 | ELMO1           | -6.526572  | down | engulfment and cell motility 1                              |
| 8132013 | CHN2            | -6.5540757 | down | chimerin (chimaerin) 2                                      |
| 8070458 | PLAC4           | -6.5582395 | down | placenta-specific 4                                         |
| 8154491 | ADAMTSL1        | -6.559267  | down | ADAMTS-like 1                                               |
| 8142981 | PODXL           | -6.5923147 | down | podocalyxin-like                                            |
| 7965226 | RASSF9          | -6.61906   | down | Ras association (RalGDS/AF-6) domain family (N-terminal)    |
| 8091972 | EVI1 MDS1       | -6.720323  | down | ecotropic viral integration site 1   myelodysplasia syndron |
| 8180003 | HLA-DRB3 HLA-DF | -6.7527504 | down |                                                             |
| 7948058 | FOLH1 PSMAL     | -6.757445  | down | folate hydrolase (prostate-specific membrane antigen) 1     |
| 7917850 | ARHGAP29        | -6.7676315 | down | Rho GTPase activating protein 29                            |
| 8096301 | SPP1            | -6.818613  | down | secreted phosphoprotein 1 (osteopontin, bone sialoprotei    |
| 8178802 | HLA-DRB3 HLA-DF | -6.836559  | down |                                                             |
| 7942998 | PSMAL FOLH1     | -6.8369656 | down | growth-inhibiting protein 26   folate hydrolase (prostate-s |
| 8176234 | CLIC2           | -6.9065046 | down | chloride intracellular channel 2                            |
| 7968789 | C13orf15        | -7.0004697 | down | chromosome 13 open reading frame 15                         |
| 8146794 | DEPDC2          | -7.0170884 | down | DEP domain containing 2                                     |
| 8105061 | FYB             | -7.359969  | down |                                                             |
| 8178811 | HLA-DRB3 HLA-DF | -7.370087  | down |                                                             |
| 8037205 | CEACAM1         | -7.6192417 | down | carcinoembryonic antigen-related cell adhesion molecule     |
| 8173755 | ITM2A           | -7.675478  | down | integral membrane protein 2A                                |
| 7929282 | HHEX            | -7.780953  | down | hematopoietically expressed homeobox                        |
| 7943998 | NNMT            | -7.821451  | down | nicotinamide N-methyltransferase                            |
| 7961026 | OVOS LOC728715  | -7.858189  | down | ovostatin   similar to hCG38149                             |
| 8166925 | MAOA            | -8.000709  | down | monoamine oxidase A                                         |
| 7977615 | RNASE1          | -8.126245  | down | ribonuclease, RNase A family, 1 (pancreatic)                |
| 8160138 | NFIB            | -8.14511   | down | nuclear factor I/B                                          |
| 7988876 | MYO5C           | -8.302121  | down | myosin VC                                                   |
| 8147766 | FZD6            | -8.352156  | down | frizzled homolog 6 (Drosophila)                             |
| 8095110 | KIT             | -8.393392  | down | v-kit Hardy-Zuckerman 4 feline sarcoma viral oncogene hc    |
| 8133961 | RUNDC3B         | -8.58684   | down | RUN domain containing 3B                                    |
| 8096704 | NPNT            | -8.624814  | down | nephronectin                                                |
| 8081657 | CD200           | -8.7016735 | down |                                                             |
| 8099476 | PROM1           | -8.849545  | down | prominin 1                                                  |



## Supplemental Table 1b

eMSC vs. eEN

|         |            |            |      |                                                             |
|---------|------------|------------|------|-------------------------------------------------------------|
| 8065280 | C20orf74   | -8.862373  | down | chromosome 20 open reading frame 74                         |
| 8046428 | RAPGEF4    | -8.90411   | down | Rap guanine nucleotide exchange factor (GEF) 4              |
| 8056222 | DPP4       | -8.98089   | down | dipeptidyl-peptidase 4 (CD26, adenosine deaminase comp      |
| 8112045 | ESM1       | -9.090598  | down | endothelial cell-specific molecule 1                        |
| 8138504 | RAPGEF5    | -9.102748  | down | Rap guanine nucleotide exchange factor (GEF) 5              |
| 8154692 | TEK        | -9.315761  | down |                                                             |
| 7927964 | SRGN       | -9.321351  | down | serglycin                                                   |
| 8099760 | CENTD1     | -9.374286  | down | centaurin, delta 1                                          |
| 8069668 | CYYR1      | -9.379273  | down | cysteine/tyrosine-rich 1                                    |
| 8172254 | CXorf36    | -9.408927  | down | chromosome X open reading frame 36                          |
| 7960438 | TMEM16B    | -9.541168  | down | transmembrane protein 16B                                   |
| 8007348 | RAMP2      | -9.648039  | down | receptor (G protein-coupled) activity modifying protein 2   |
| 8022612 | ZNF521     | -9.930587  | down | zinc finger protein 521                                     |
| 8091411 | TM4SF1     | -10.00164  | down | transmembrane 4 L six family member 1                       |
| 8065359 | CD93       | -10.282643 | down |                                                             |
| 7996264 | CDH5       | -11.08791  | down | cadherin 5, type 2, VE-cadherin (vascular epithelium)       |
| 7923978 | CD34       | -11.105854 | down |                                                             |
| 8041422 | RASGRP3    | -11.346768 | down | RAS guanyl releasing protein 3 (calcium and DAG-regulate    |
| 8115147 | CD74       | -11.350591 | down |                                                             |
| 7945132 | FLI1 EWSR1 | -11.555531 | down | Friend leukemia virus integration 1   Ewing sarcoma brea    |
| 8009502 | KCNJ2      | -11.676022 | down | potassium inwardly-rectifying channel, subfamily J, memb    |
| 8052355 | EFEMP1     | -12.008141 | down | EGF-containing fibulin-like extracellular matrix protein 1  |
| 7920123 | S100A10    | -12.371281 | down | S100 calcium binding protein A10                            |
| 8060897 | PLCB4      | -12.715873 | down | phospholipase C, beta 4                                     |
| 8092169 | TNFSF10    | -13.150596 | down | tumor necrosis factor (ligand) superfamily, member 10       |
| 7974835 | PRKCH      | -13.25225  | down | protein kinase C, eta                                       |
| 8046099 | NOSTRIN    | -13.511957 | down | nitric oxide synthase trafficker                            |
| 7903227 | PALMD      | -14.075316 | down | palmdelphin                                                 |
| 8100393 | KDR        | -14.381505 | down | kinase insert domain receptor (a type III receptor tyrosine |
| 8140782 | ABCB1      | -14.904908 | down | ATP-binding cassette, sub-family B (MDR/TAP), member 1      |
| 8118548 | HLA-DRA    | -15.845757 | down | major histocompatibility complex, class II, DR alpha        |
| 8137244 | GIMAP4     | -15.954878 | down | GTPase, IMAP family member 4                                |
| 8070297 | ERG        | -16.347593 | down | v-ets erythroblastosis virus E26 oncogene homolog (avian    |

Supplemental Table 1b  
eMSC vs. eEN

|         |         |            |      |                                                            |
|---------|---------|------------|------|------------------------------------------------------------|
| 8179481 | HLA-DRA | -16.45526  | down | major histocompatibility complex, class II, DR alpha       |
| 8122860 | MYCT1   | -16.567099 | down | myc target 1                                               |
| 7964872 | PTPRB   | -16.827652 | down | protein tyrosine phosphatase, receptor type, B             |
| 7908597 | NR5A2   | -17.331745 | down | nuclear receptor subfamily 5, group A, member 2            |
| 8178193 | HLA-DRA | -17.59579  | down | major histocompatibility complex, class II, DR alpha       |
| 8091402 | TM4SF18 | -18.330008 | down | transmembrane 4 L six family member 18                     |
| 7960464 | VWF     | -18.524239 | down | von Willebrand factor                                      |
| 8017599 | PECAM1  | -19.02515  | down | platelet/endothelial cell adhesion molecule (CD31 antigen) |
| 7922229 | SELE    | -21.43954  | down | selectin E (endothelial adhesion molecule 1)               |
| 8101957 | EMCN    | -22.550598 | down | endomucin                                                  |
| 7917182 | ELTD1   | -26.687098 | down | EGF, latrophilin and seven transmembrane domain contain    |
| 8096415 | MMRN1   | -28.111507 | down | multimerin 1                                               |

Supplemental Table 1c  
eMSC vs. eSF

| Transcripts Cluster Id | Genesymbol  | eMSC vs. eSF (Fold Change) | Regulation | Gene description                                          |
|------------------------|-------------|----------------------------|------------|-----------------------------------------------------------|
| 7921916                | RGS5        | 39.859512                  | up         | regulator of G-protein signaling 5                        |
| 8149071                | ANGPT2      | 25.61775                   | up         | angiopoietin 2                                            |
| 8007701                | HIGD1B      | 18.387976                  | up         | HIG1 domain family, member 1B                             |
| 8056363                | SLC38A11    | 17.57202                   | up         | solute carrier family 38, member 11                       |
| 8104663                | CDH6        | 16.526825                  | up         | cadherin 6, type 2, K-cadherin (fetal kidney)             |
| 8144917                | LPL         | 15.931173                  | up         | lipoprotein lipase                                        |
| 8170648                | BGN         | 12.310639                  | up         | biglycan                                                  |
| 8126798                | GPR116      | 11.981095                  | up         | G protein-coupled receptor 116                            |
| 8123920                | ELOVL2      | 11.936222                  | up         | elongation of very long chain fatty acids (FEN1/Elo2, SLC |
| 7952205                | MCAM        | 10.21646                   | up         | melanoma cell adhesion molecule                           |
| 8023497                | ATP8B1      | 9.844899                   | up         | ATPase, class I, type 8B, member 1                        |
| 8146957                | PI15        | 9.834398                   | up         | peptidase inhibitor 15                                    |
| 8081067                | HTR1F       | 9.239014                   | up         | 5-hydroxytryptamine (serotonin) receptor 1F               |
| 8097973                | GUCY1B3     | 9.137931                   | up         | guanylate cyclase 1, soluble, beta 3                      |
| 7937952                | OR51E1      | 8.644006                   | up         | olfactory receptor, family 51, subfamily E, member 1      |
| 7961710                | ABCC9       | 8.0964                     | up         | ATP-binding cassette, sub-family C (CFTR/MRP), memb       |
| 7934906                | ACTA2       | 8.087425                   | up         | actin, alpha 2, smooth muscle, aorta                      |
| 8115543                | EBF1        | 7.6178493                  | up         | early B-cell factor 1                                     |
| 8064978                | JAG1        | 7.543838                   | up         | jagged 1 (Alagille syndrome)                              |
| 8057486                | PDE1A       | 7.3707876                  | up         | phosphodiesterase 1A, calmodulin-dependent                |
| 8137670                | PDGFA       | 7.118826                   | up         | platelet-derived growth factor alpha polypeptide          |
| 8105229                | PELO ITGA1  | 6.979694                   | up         | pelota homolog (Drosophila)   integrin, alpha 1           |
| 8106573                | THBS4       | 6.8787093                  | up         | thrombospondin 4                                          |
| 8094301                | SLIT2       | 6.762414                   | up         | slit homolog 2 (Drosophila)                               |
| 7979133                | NID2        | 6.7582603                  | up         | nidogen 2 (osteonidogen)                                  |
| 8105013                | EGFLAM      | 6.7046657                  | up         | EGF-like, fibronectin type III and laminin G domains      |
| 8115099                | PDGFRB      | 6.4069486                  | up         | platelet-derived growth factor receptor, beta polypept    |
| 7960947                | A2M         | 6.2119184                  | up         | alpha-2-macroglobulin                                     |
| 8157153                | PALM2-AKAP2 | 6.0193343                  | up         |                                                           |
| 7972750                | COL4A1      | 5.9997296                  | up         | collagen, type IV, alpha 1                                |
| 8014768                | PLXDC1      | 5.9896455                  | up         | plexin domain containing 1                                |
| 8129071                | FRK         | 5.8544874                  | up         | fyn-related kinase                                        |

Supplemental Table 1c  
eMSC vs. eSF

|         |                |           |    |                                                                                    |
|---------|----------------|-----------|----|------------------------------------------------------------------------------------|
| 8097957 | GUCY1A3        | 5.7485414 | up | guanylate cyclase 1, soluble, alpha 3                                              |
| 7961540 | RERG           | 5.675406  | up | RAS-like, estrogen-regulated, growth inhibitor                                     |
| 7961532 | ARHGDIB        | 5.6403213 | up | Rho GDP dissociation inhibitor (GDI) beta                                          |
| 7950555 | LRRC32         | 5.5332103 | up | leucine rich repeat containing 32                                                  |
| 7999674 | MYH11          | 5.5049086 | up | myosin, heavy chain 11, smooth muscle                                              |
| 7970763 | FLT1           | 5.3040934 | up | fms-related tyrosine kinase 1 (vascular endothelial growth factor receptor type 1) |
| 8006214 | CENTA2         | 5.247387  | up | centaurin, alpha 2                                                                 |
| 8078286 | RARB LOC100130 | 5.234135  | up | retinoic acid receptor, beta   hypothetical protein LOC100130                      |
| 8148501 | PTP4A3 LOC1001 | 5.192289  | up | protein tyrosine phosphatase type IVA, member 3   sir                              |
| 8083779 | SERPINI1       | 5.1845984 | up | serpin peptidase inhibitor, clade I (neuroserpin), member 1                        |
| 8113039 | MEF2C          | 5.1806307 | up | myocyte enhancer factor 2C                                                         |
| 8146863 | SULF1          | 5.1504045 | up | sulfatase 1                                                                        |
| 7909789 | TGFB2          | 5.135372  | up | transforming growth factor, beta 2                                                 |
| 8041781 | EPAS1          | 5.130632  | up | endothelial PAS domain protein 1                                                   |
| 7966749 | TESC           | 5.127523  | up | tescalcin                                                                          |
| 7915229 | HEYL           | 5.048464  | up | hairy/enhancer-of-split related with YRPW motif-like                               |
| 8140840 | STEAP4         | 5.024385  | up | STEAP family member 4                                                              |
| 8152617 | HAS2           | 4.9446473 | up | hyaluronan synthase 2                                                              |
| 8115691 | SLIT3          | 4.9219275 | up | slit homolog 3 (Drosophila)                                                        |
| 7933733 | FAM13C1        | 4.9146733 | up | family with sequence similarity 13, member C1                                      |
| 8097753 | DCLK2          | 4.827244  | up | doublecortin-like kinase 2                                                         |
| 8062312 | MYL9           | 4.7126946 | up | myosin, light chain 9, regulatory                                                  |
| 7944082 | TAGLN          | 4.6885242 | up | transgelin                                                                         |
| 8016094 | GJC1           | 4.6674647 | up | gap junction protein, gamma 1, 45kDa                                               |
| 8135594 | CAV1           | 4.6391816 | up | caveolin 1, caveolae protein, 22kDa                                                |
| 7913357 | ECE1           | 4.6108074 | up | endothelin converting enzyme 1                                                     |
| 8161964 | FRMD3          | 4.537095  | up | FERM domain containing 3                                                           |
| 7921882 | OLFML2B        | 4.500154  | up | olfactomedin-like 2B                                                               |
| 8121850 | HEY2           | 4.438239  | up | hairy/enhancer-of-split related with YRPW motif 2                                  |
| 8007420 | AOC3           | 4.3470025 | up | amine oxidase, copper containing 3 (vascular adhesion protein 1)                   |
| 7936439 | AFAP1L2        | 4.3325443 | up | actin filament associated protein 1-like 2                                         |
| 8121712 | SLC35F1        | 4.1912107 | up | solute carrier family 35, member F1                                                |
| 8113491 | STARD4         | 4.1690435 | up | StAR-related lipid transfer (START) domain containing 4                            |

Supplemental Table 1c  
eMSC vs. eSF

|         |                  |           |    |                                                           |
|---------|------------------|-----------|----|-----------------------------------------------------------|
| 7935180 | PDLIM1           | 4.1656647 | up | PDZ and LIM domain 1 (elfin)                              |
| 8057506 | FRZB             | 4.1024933 | up | frizzled-related protein                                  |
| 8085665 | RFTN1            | 4.0639915 | up | raftlin, lipid raft linker 1                              |
| 8124531 | HIST1H3I HIST1H: | 4.04637   | up | histone cluster 1, H3i   histone cluster 1, H2bn   histon |
| 8023598 | RNF152           | 4.0246396 | up | ring finger protein 152                                   |
| 7980958 | LGMN             | 3.9898431 | up | legumain                                                  |
| 7934936 | SLC16A12         | 3.9844487 | up | solute carrier family 16, member 12 (monocarboxylic a     |
| 8141206 | BAIAP2L1 LOC10C  | 3.9498339 | up | BAI1-associated protein 2-like 1   hypothetical protein   |
| 8072626 | TIMP3            | 3.9393682 | up | TIMP metallopeptidase inhibitor 3 (Sorsby fundus dysti    |
| 7932082 | CCDC3            | 3.9313686 | up | coiled-coil domain containing 3                           |
| 8123104 | FNDC1            | 3.925917  | up | fibronectin type III domain containing 1                  |
| 7970954 | DCLK1            | 3.918485  | up | doublecortin-like kinase 1                                |
| 7923608 | REN              | 3.9135392 | up | renin                                                     |
| 8050766 | ADCY3            | 3.9036036 | up | adenylate cyclase 3                                       |
| 8096489 | PDLIM5           | 3.8661084 | up | PDZ and LIM domain 5                                      |
| 7954293 | PDE3A            | 3.813806  | up | phosphodiesterase 3A, cGMP-inhibited                      |
| 8047926 | MAP2             | 3.7885416 | up | microtubule-associated protein 2                          |
| 8043363 | C2orf59 LOC5414  | 3.7699213 | up | chromosome 2 open reading frame 59   hypothetical L       |
| 8038319 | HRC              | 3.7279139 | up | histidine rich calcium binding protein                    |
| 8163896 | STOM             | 3.693373  | up | stomatin                                                  |
| 8127646 | FILIP1           | 3.6606815 | up | filamin A interacting protein 1                           |
| 7991234 | MFGE8            | 3.6232793 | up | milk fat globule-EGF factor 8 protein                     |
| 8042788 | ACTG2            | 3.5937383 | up | actin, gamma 2, smooth muscle, enteric                    |
| 8054611 | C2orf59 LOC5414  | 3.5761762 | up | chromosome 2 open reading frame 59   hypothetical L       |
| 7945991 | OR51E2           | 3.5712845 | up | olfactory receptor, family 51, subfamily E, member 2      |
| 7970033 | COL4A2           | 3.5285914 | up | collagen, type IV, alpha 2                                |
| 8017039 | 41156            | 3.508146  | up | septin 4                                                  |
| 7922717 | RGS16            | 3.4778879 | up | regulator of G-protein signaling 16                       |
| 8166079 | EGFL6            | 3.4533367 | up | EGF-like-domain, multiple 6                               |
| 8036710 | GMFG             | 3.4432118 | up | glia maturation factor, gamma                             |
| 8056343 | COBLL1           | 3.432779  | up | COBL-like 1                                               |
| 7927606 | PRKG1            | 3.3944433 | up | protein kinase, cGMP-dependent, type I                    |
| 7952601 | ETS1             | 3.344579  | up | v-ets erythroblastosis virus E26 oncogene homolog 1 (;    |

Supplemental Table 1c  
eMSC vs. eSF

|         |          |           |    |                                                         |
|---------|----------|-----------|----|---------------------------------------------------------|
| 7921487 | TAGLN2   | 3.3276627 | up | transgelin 2                                            |
| 7965322 | KITLG    | 3.3036427 | up | KIT ligand                                              |
| 7918323 | SORT1    | 3.278488  | up | sortilin 1                                              |
| 7961702 | KCNJ8    | 3.2658613 | up | potassium inwardly-rectifying channel, subfamily J, me  |
| 7952268 | THY1     | 3.261638  | up | Thy-1 cell surface antigen                              |
| 8154381 | C9orf150 | 3.223361  | up | chromosome 9 open reading frame 150                     |
| 7972428 | OXGR1    | 3.2205396 | up | oxoglutarate (alpha-ketoglutarate) receptor 1           |
| 8017599 | PECAM1   | 3.2180772 | up | platelet/endothelial cell adhesion molecule (CD31 anti; |
| 8144322 | MYOM2    | 3.1821203 | up | myomesin (M-protein) 2, 165kDa                          |
| 8078350 | TGFBR2   | 3.1778355 | up | transforming growth factor, beta receptor II (70/80kDa  |
| 7916843 | GNG12    | 3.1686513 | up | guanine nucleotide binding protein (G protein), gamma   |
| 8138067 | PSCD3    | 3.1615136 | up | pleckstrin homology, Sec7 and coiled-coil domains 3     |
| 8045470 | THSD7B   | 3.153689  | up | thrombospondin, type I, domain containing 7B            |
| 7976012 | NRXN3    | 3.145702  | up | neurexin 3                                              |
| 7932796 | SVIL     | 3.139026  | up | supervillin                                             |
| 8097513 | MGST2    | 3.129498  | up | microsomal glutathione S-transferase 2                  |
| 7906919 | RGS4     | 3.0935621 | up | regulator of G-protein signaling 4                      |
| 8138489 | CDCA7L   | 3.088396  | up | cell division cycle associated 7-like                   |
| 7961546 | EPS8     | 3.0671816 | up | epidermal growth factor receptor pathway substrate 8    |
| 8086120 | DCLK3    | 3.044594  | up | doublecortin-like kinase 3                              |
| 8167185 | TIMP1    | 3.0356877 | up | TIMP metallopeptidase inhibitor 1                       |
| 8096733 | SGMS2    | 3.0168424 | up | sphingomyelin synthase 2                                |
| 7953291 | CD9      | 3.0012572 | up |                                                         |
| 8123936 | NEDD9    | 2.9814706 | up | neural precursor cell expressed, developmentally down   |
| 8111153 | MYO10    | 2.9802783 | up | myosin X                                                |
| 7900340 | BMP8A    | 2.9603064 | up | bone morphogenetic protein 8a                           |
| 7917347 | DDAH1    | 2.9112747 | up | dimethylarginine dimethylaminohydrolase 1               |
| 7964834 | CPM      | 2.9011188 | up | carboxypeptidase M                                      |
| 8058869 | TNS1     | 2.8995695 | up | tensin 1                                                |
| 7949588 | CD248    | 2.8960829 | up |                                                         |
| 8091411 | TM4SF1   | 2.8571217 | up | transmembrane 4 L six family member 1                   |
| 8097991 | TDO2     | 2.7983415 | up | tryptophan 2,3-dioxygenase                              |
| 8102982 | GAB1     | 2.791901  | up | GRB2-associated binding protein 1                       |

Supplemental Table 1c  
eMSC vs. eSF

|         |               |           |    |                                                                          |
|---------|---------------|-----------|----|--------------------------------------------------------------------------|
| 8171684 | SH3KBP1       | 2.780718  | up | SH3-domain kinase binding protein 1                                      |
| 8128991 | LAMA4         | 2.7746294 | up | laminin, alpha 4                                                         |
| 8141140 | DLX5          | 2.7561707 | up | distal-less homeobox 5                                                   |
| 7990632 | SGK269        | 2.7385702 | up | NKF3 kinase family member                                                |
| 8140319 | HIP1          | 2.733466  | up | huntingtin interacting protein 1                                         |
| 7997642 | CRISPLD2      | 2.730009  | up | cysteine-rich secretory protein LCCL domain containing                   |
| 8028524 | ACTN4         | 2.7291493 | up | actinin, alpha 4                                                         |
| 8097080 | SYNPO2        | 2.7224848 | up | synaptopodin 2                                                           |
| 8004545 | ATP1B2        | 2.7154288 | up | ATPase, Na <sup>+</sup> /K <sup>+</sup> transporting, beta 2 polypeptide |
| 8114797 | SPRY4         | 2.7149603 | up | sprouty homolog 4 (Drosophila)                                           |
| 8021685 | CCDC102B      | 2.7058296 | up | coiled-coil domain containing 102B                                       |
| 8061572 | COX4I2        | 2.6886873 | up | cytochrome c oxidase subunit IV isoform 2 (lung)                         |
| 7929052 | IFIT3         | 2.687294  | up | interferon-induced protein with tetratricopeptide repe                   |
| 8019802 | RNU2 RNU2B WI | 2.6866293 | up | RNA, U2 small nuclear   RNA, U2B small nuclear   WD                      |
| 7956401 | SHMT2         | 2.6832762 | up | serine hydroxymethyltransferase 2 (mitochondrial)                        |
| 8041995 | SPTBN1        | 2.6818454 | up | spectrin, beta, non-erythrocytic 1                                       |
| 8045336 | GPR39         | 2.669433  | up | G protein-coupled receptor 39                                            |
| 7938231 | PPFIBP2       | 2.668216  | up | PTPRF interacting protein, binding protein 2 (liprin bet:                |
| 7940626 | SCGB2A1       | 2.6677723 | up | secretoglobin, family 2A, member 1                                       |
| 8112865 | SERINC5       | 2.6530921 | up | serine incorporator 5                                                    |
| 8096160 | ARHGAP24      | 2.649357  | up | Rho GTPase activating protein 24                                         |
| 8099982 | APBB2         | 2.6451175 | up | amyloid beta (A4) precursor protein-binding, family B,                   |
| 8100154 | CORIN         | 2.6356082 | up | corin, serine peptidase                                                  |
| 7901272 | CYP4X1        | 2.6341844 | up | cytochrome P450, family 4, subfamily X, polypeptide 1                    |
| 8019707 | RNU2 RNU2B WI | 2.6338716 | up | RNA, U2 small nuclear   RNA, U2B small nuclear   WD                      |
| 8019705 | RNU2 RNU2B WI | 2.6337917 | up | RNA, U2 small nuclear   RNA, U2B small nuclear   WD                      |
| 8019641 | RNU2 RNU2B WI | 2.633768  | up | RNA, U2 small nuclear   RNA, U2B small nuclear   WD                      |
| 8019703 | RNU2 RNU2B WI | 2.6336546 | up | RNA, U2 small nuclear   RNA, U2B small nuclear   WD                      |
| 8019635 | RNU2 RNU2B WI | 2.633573  | up | RNA, U2 small nuclear   RNA, U2B small nuclear   WD                      |
| 8019639 | RNU2 RNU2B WI | 2.633383  | up | RNA, U2 small nuclear   RNA, U2B small nuclear   WD                      |
| 8019637 | RNU2 RNU2B WI | 2.6332989 | up | RNA, U2 small nuclear   RNA, U2B small nuclear   WD                      |
| 8019631 | RNU2 RNU2B WI | 2.633139  | up | RNA, U2 small nuclear   RNA, U2B small nuclear   WD                      |
| 8019633 | RNU2 RNU2B WI | 2.6330087 | up | RNA, U2 small nuclear   RNA, U2B small nuclear   WD                      |

Supplemental Table 1c  
eMSC vs. eSF

|         |               |           |    |                                                           |
|---------|---------------|-----------|----|-----------------------------------------------------------|
| 8171248 | KAL1          | 2.6320515 | up | Kallmann syndrome 1 sequence                              |
| 8126163 | KCNK17        | 2.630002  | up | potassium channel, subfamily K, member 17                 |
| 8019709 | RNU2 RNU2B WI | 2.628238  | up | RNA, U2 small nuclear   RNA, U2B small nuclear   WD       |
| 8084880 | HES1          | 2.6176593 | up | hairy and enhancer of split 1, (Drosophila)               |
| 8178598 | CLIC1         | 2.611669  | up | chloride intracellular channel 1                          |
| 7899939 | GJA4          | 2.6099498 | up | gap junction protein, alpha 4, 37kDa                      |
| 8087935 | NT5DC2        | 2.6079493 | up | 5'-nucleotidase domain containing 2                       |
| 8055952 | NR4A2         | 2.6033356 | up | nuclear receptor subfamily 4, group A, member 2           |
| 8084794 | IL1RAP        | 2.6012306 | up | interleukin 1 receptor accessory protein                  |
| 8067040 | NFATC2        | 2.591726  | up | nuclear factor of activated T-cells, cytoplasmic, calcine |
| 8092520 | LOC285382     | 2.5909288 | up | hypothetical gene supported by AK091454                   |
| 8162908 | GRIN3A        | 2.5890057 | up | glutamate receptor, ionotropic, N-methyl-D-aspartate      |
| 7972826 | C13orf29      | 2.5847359 | up | chromosome 13 open reading frame 29                       |
| 8156134 | NTRK2         | 2.579958  | up | neurotrophic tyrosine kinase, receptor, type 2            |
| 8028652 | ZFP36         | 2.557044  | up | zinc finger protein 36, C3H type, homolog (mouse)         |
| 7942417 | ARHGEF17      | 2.5433826 | up | Rho guanine nucleotide exchange factor (GEF) 17           |
| 7982597 | THBS1         | 2.5430193 | up | thrombospondin 1                                          |
| 7953385 | GAPDH         | 2.5407963 | up | glyceraldehyde-3-phosphate dehydrogenase                  |
| 8090591 | PLXND1        | 2.5396209 | up | plexin D1                                                 |
| 8009353 | PITPNC1       | 2.5386186 | up | phosphatidylinositol transfer protein, cytoplasmic 1      |
| 7950810 | SYTL2         | 2.5379632 | up | synaptotagmin-like 2                                      |
| 8049448 | CENTG2        | 2.5284975 | up | centaurin, gamma 2                                        |
| 8126839 | TNFRSF21      | 2.5280752 | up | tumor necrosis factor receptor superfamily, member 2      |
| 8117377 | HIST1H1E      | 2.5266852 | up | histone cluster 1, H1e                                    |
| 8040365 | TRIB2         | 2.523417  | up | tribbles homolog 2 (Drosophila)                           |
| 8070194 | RUNX1         | 2.522657  | up | runt-related transcription factor 1 (acute myeloid leuki  |
| 8115147 | CD74          | 2.522044  | up |                                                           |
| 8034940 | NOTCH3        | 2.5013971 | up | Notch homolog 3 (Drosophila)                              |
| 8179827 | CLIC1         | 2.4946408 | up | chloride intracellular channel 1                          |
| 8006820 | LASP1         | 2.488312  | up | LIM and SH3 protein 1                                     |
| 8075728 | MYH9          | 2.4853454 | up | myosin, heavy chain 9, non-muscle                         |
| 8142345 | DOCK4         | 2.4812512 | up | dedicator of cytokinesis 4                                |
| 8070297 | ERG           | 2.4805486 | up | v-ets erythroblastosis virus E26 oncogene homolog (av     |



Supplemental Table 1c  
eMSC vs. eSF

|         |                |           |    |                                                            |
|---------|----------------|-----------|----|------------------------------------------------------------|
| 7963880 | ITGA7          | 2.4797745 | up | integrin, alpha 7                                          |
| 8088745 | FRMD4B         | 2.4771063 | up | FERM domain containing 4B                                  |
| 8125059 | CLIC1          | 2.4741333 | up | chloride intracellular channel 1                           |
| 7963092 | FMNL3          | 2.4731321 | up | formin-like 3                                              |
| 8103630 | SH3RF1         | 2.4730449 | up | SH3 domain containing ring finger 1                        |
| 8047127 | MYO1B          | 2.4712603 | up | myosin IB                                                  |
| 8138527 | MGC87042       | 2.470592  | up | similar to Six transmembrane epithelial antigen of pros    |
| 8076481 | CYB5R3         | 2.4606047 | up | cytochrome b5 reductase 3                                  |
| 7995783 | MT2A           | 2.4494119 | up | metallothionein 2A                                         |
| 8007828 | MAPT           | 2.4413826 | up | microtubule-associated protein tau                         |
| 7960850 | SLC2A14 SLC2A3 | 2.4380043 | up | solute carrier family 2 (facilitated glucose transporter), |
| 8008819 | YPEL2          | 2.437325  | up | yippee-like 2 (Drosophila)                                 |
| 8104746 | NPR3           | 2.4332776 | up | natriuretic peptide receptor C/guanylate cyclase C (atri   |
| 8094574 | TBC1D1         | 2.422718  | up | TBC1 (tre-2/USP6, BUB2, cdc16) domain family, memb         |
| 7906085 | LMNA           | 2.4160528 | up | lamin A/C                                                  |
| 8014115 | MYO1D          | 2.4112408 | up | myosin ID                                                  |
| 8115490 | ADAM19         | 2.4053726 | up | ADAM metallopeptidase domain 19 (meltrin beta)             |
| 7932530 | PIP4K2A        | 2.4051733 | up | phosphatidylinositol-5-phosphate 4-kinase, type II, alpl   |
| 8176026 | FLNA           | 2.4033818 | up | filamin A, alpha (actin binding protein 280)               |
| 7907611 | RASAL2         | 2.3965945 | up | RAS protein activator like 2                               |
| 8066117 | SAMHD1         | 2.3963919 | up | SAM domain and HD domain 1                                 |
| 8091402 | TM4SF18        | 2.3946693 | up | transmembrane 4 L six family member 18                     |
| 8020183 | IMPA2          | 2.390936  | up | inositol(myo)-1(or 4)-monophosphatase 2                    |
| 8148317 | MYC LOC1001305 | 2.3845184 | up | v-myc myelocytomatosis viral oncogene homolog (avian       |
| 8174692 | 41158          | 2.3795757 | up | septin 6                                                   |
| 8003298 | SLC7A5         | 2.377354  | up | solute carrier family 7 (cationic amino acid transporter,  |
| 8069689 | ADAMTS5        | 2.3749688 | up | ADAM metallopeptidase with thrombospondin type 1 r         |
| 8028656 | PLEKHG2        | 2.374167  | up | pleckstrin homology domain containing, family G (with      |
| 8024111 | CNN2           | 2.365351  | up | calponin 2                                                 |
| 7972557 | EBI2           | 2.3638885 | up | Epstein-Barr virus induced gene 2 (lymphocyte-specific     |
| 8129677 | SGK1           | 2.3622093 | up | serum/glucocorticoid regulated kinase 1                    |
| 7928630 | EIF5AL1        | 2.346901  | up | eukaryotic translation initiation factor 5A-like 1   eukai |
| 8048749 | KCNE4          | 2.342264  | up | potassium voltage-gated channel, Isk-related family, m     |

Supplemental Table 1c  
eMSC vs. eSF

|         |                     |           |    |                                                            |
|---------|---------------------|-----------|----|------------------------------------------------------------|
| 8069269 | COL6A1              | 2.3400545 | up | collagen, type VI, alpha 1                                 |
| 7990545 | CSPG4               | 2.3365989 | up | chondroitin sulfate proteoglycan 4                         |
| 7943263 | AMOTL1              | 2.332306  | up | angiomin like 1                                            |
| 8178435 | IER3                | 2.326652  | up | immediate early response 3                                 |
| 7931353 | PTPRE               | 2.3262403 | up | protein tyrosine phosphatase, receptor type, E             |
| 8053484 | ST3GAL5             | 2.3164136 | up | ST3 beta-galactoside alpha-2,3-sialyltransferase 5         |
| 8091972 | EVI1   MDS1         | 2.3154829 | up | ecotropic viral integration site 1   myelodysplasia synd   |
| 8165217 | NOTCH1              | 2.3129818 | up | Notch homolog 1, translocation-associated (Drosophila      |
| 8010161 | 41161               | 2.3108087 | up | septin 9                                                   |
| 8150509 | PLAT                | 2.3093455 | up | plasminogen activator, tissue                              |
| 8162404 | ECM2                | 2.3073905 | up | extracellular matrix protein 2, female organ and adipoc    |
| 7943349 | FLJ32810            | 2.304317  | up |                                                            |
| 8177858 | TUBB                | 2.2997298 | up | tubulin, beta                                              |
| 8179174 | TUBB                | 2.2980776 | up | tubulin, beta                                              |
| 8117995 | TUBB                | 2.2978194 | up | tubulin, beta                                              |
| 7978285 | ADCY4               | 2.295968  | up | adenylate cyclase 4                                        |
| 7954065 | GPRC5A              | 2.293808  | up | G protein-coupled receptor, family C, group 5, member      |
| 7952436 | ESAM                | 2.2915213 | up | endothelial cell adhesion molecule                         |
| 7917182 | ELTD1               | 2.2891924 | up | EGF, latrophilin and seven transmembrane domain cor        |
| 7934753 | EIF5AL1             | 2.2795508 | up | eukaryotic translation initiation factor 5A-like 1   eukai |
| 7939314 | EHF                 | 2.2783132 | up | ets homologous factor                                      |
| 7934997 | PPP1R3C             | 2.274978  | up | protein phosphatase 1, regulatory (inhibitor) subunit 3    |
| 8117800 | HLA-A   HLA-H   HLA | 2.2676249 | up | major histocompatibility complex, class I, A   major his   |
| 7956856 | MSRB3               | 2.2667    | up | methionine sulfoxide reductase B3                          |
| 8026490 | UCA1                | 2.260542  | up | urothelial cancer associated 1                             |
| 8177732 | HLA-A   HLA-H   HLA | 2.257576  | up | major histocompatibility complex, class I, A   major his   |
| 7970111 | ARHGEF7             | 2.2573795 | up | Rho guanine nucleotide exchange factor (GEF) 7             |
| 7924166 | BATF3               | 2.2560616 | up | basic leucine zipper transcription factor, ATF-like 3      |
| 8110932 | SEMA5A              | 2.2560422 | up | sema domain, seven thrombospondin repeats (type 1 ;        |
| 7928600 | EIF5AL1             | 2.2559946 | up | eukaryotic translation initiation factor 5A-like 1   eukai |
| 8054519 | LIMS3   LOC729261   | 2.2535844 | up | LIM and senescent cell antigen-like domains 3   similar    |
| 7971150 | LHFP                | 2.2468493 | up | lipoma HMGIC fusion partner                                |
| 8044333 | LIMS3   LOC729261   | 2.2468278 | up | LIM and senescent cell antigen-like domains 3   similar    |

Supplemental Table 1c  
eMSC vs. eSF

|         |                   |           |    |                                                            |
|---------|-------------------|-----------|----|------------------------------------------------------------|
| 8135576 | TES               | 2.2468145 | up | testis derived transcript (3 LIM domains)                  |
| 7909236 | MAPKAPK2          | 2.2436452 | up | mitogen-activated protein kinase-activated protein kin     |
| 7908597 | NR5A2             | 2.2426012 | up | nuclear receptor subfamily 5, group A, member 2            |
| 8026300 | CD97              | 2.2399805 | up |                                                            |
| 8119357 | DAAM2             | 2.239028  | up | dishevelled associated activator of morphogenesis 2        |
| 7906307 | KIRREL            | 2.2357683 | up | kin of IRRE like (Drosophila)                              |
| 7943369 | TMEM133           | 2.2339969 | up | transmembrane protein 133                                  |
| 7908041 | LAMC1             | 2.2339685 | up | laminin, gamma 1 (formerly LAMB2)                          |
| 7960865 | SLC2A3            | 2.2310011 | up | solute carrier family 2 (facilitated glucose transporter), |
| 8169350 | LOC100134364      | 2.2294018 | up |                                                            |
| 7920123 | S100A10           | 2.2269995 | up | S100 calcium binding protein A10                           |
| 7971104 | TRPC4             | 2.2266748 | up | transient receptor potential cation channel, subfamily     |
| 8132151 | ADCYAP1R1         | 2.221821  | up | adenylate cyclase activating polypeptide 1 (pituitary) r   |
| 7902861 | LRRC8B            | 2.2176473 | up | leucine rich repeat containing 8 family, member B          |
| 7905079 | HIST2H2AA3   HIST | 2.2122517 | up | histone cluster 2, H2aa3   histone cluster 2, H2aa4        |
| 7919619 | HIST2H2AA3   HIST | 2.2117143 | up | histone cluster 2, H2aa3   histone cluster 2, H2aa4   hi   |
| 8036473 | PPP1R14A          | 2.211119  | up | protein phosphatase 1, regulatory (inhibitor) subunit 1    |
| 8019765 | ARHGDI A          | 2.2109618 | up | Rho GDP dissociation inhibitor (GDI) alpha                 |
| 8030049 | PSCD2             | 2.2075365 | up | pleckstrin homology, Sec7 and coiled-coil domains 2 (c     |
| 8062251 | EPB41L1           | 2.2069712 | up | erythrocyte membrane protein band 4.1-like 1               |
| 8096301 | SPP1              | 2.2052188 | up | secreted phosphoprotein 1 (osteopontin, bone sialoproc     |
| 7989670 | RBPM S2           | 2.2019098 | up | RNA binding protein with multiple splicing 2               |
| 7989661 | OAZ2              | 2.1984863 | up | ornithine decarboxylase antizyme 2                         |
| 7986293 | MCTP2             | 2.1945915 | up | multiple C2 domains, transmembrane 2                       |
| 8042038 | RPL23AP13         | 2.1903007 | up | ribosomal protein L23a pseudogene 13                       |
| 7938485 | MICAL2            | 2.1898232 | up | microtubule associated monooxygenase, calponin and L       |
| 8046428 | RAPGEF4           | 2.1813805 | up | Rap guanine nucleotide exchange factor (GEF) 4             |
| 8145865 | GPR124            | 2.1804183 | up | G protein-coupled receptor 124                             |
| 8139500 | TNS3              | 2.1799383 | up | tensin 3                                                   |
| 8119088 | CDKN1A            | 2.176897  | up | cyclin-dependent kinase inhibitor 1A (p21, Cip1)           |
| 8034227 | RGL3              | 2.172296  | up | ral guanine nucleotide dissociation stimulator-like 3      |
| 7924996 | C1orf198          | 2.1719737 | up | chromosome 1 open reading frame 198                        |
| 7921088 | NES               | 2.157832  | up | nestin                                                     |

Supplemental Table 1c  
eMSC vs. eSF

|         |                 |           |    |                                                          |
|---------|-----------------|-----------|----|----------------------------------------------------------|
| 7926037 | PFKFB3          | 2.1572936 | up | 6-phosphofructo-2-kinase/fructose-2,6-biphosphatase      |
| 7985809 | ABHD2           | 2.1560204 | up | abhydrolase domain containing 2                          |
| 7964660 | AVPR1A          | 2.1556988 | up | arginine vasopressin receptor 1A                         |
| 7951437 | GUCY1A2         | 2.152266  | up | guanylate cyclase 1, soluble, alpha 2                    |
| 7968236 | RASL11A         | 2.1501572 | up | RAS-like, family 11, member A                            |
| 8065403 | CST3            | 2.1491625 | up | cystatin C                                               |
| 8136347 | CALD1           | 2.149136  | up | caldesmon 1                                              |
| 8179103 | HLA-E           | 2.1468158 | up | major histocompatibility complex, class I, E             |
| 7932132 | FRMD4A          | 2.146755  | up | FERM domain containing 4A                                |
| 8177788 | HLA-E           | 2.1408906 | up | major histocompatibility complex, class I, E             |
| 8105596 | RGS7BP          | 2.1380465 | up | regulator of G-protein signaling 7 binding protein       |
| 7953428 | CD4             | 2.1366184 | up |                                                          |
| 7905088 | HIST2H2AC BOLA  | 2.136437  | up | histone cluster 2, H2ac   bolA homolog 1 (E. coli)       |
| 8052654 | PELI1           | 2.1318245 | up | pellino homolog 1 (Drosophila)                           |
| 7947681 | ARHGAP1         | 2.1279442 | up | Rho GTPase activating protein 1                          |
| 7942135 | TMEM16A         | 2.120084  | up | transmembrane protein 16A                                |
| 8124385 | HIST1H4B HIST4F | 2.1152034 | up | histone cluster 1, H4b   histone cluster 4, H4   histone |
| 8060854 | PLCB1           | 2.1126163 | up | phospholipase C, beta 1 (phosphoinositide-specific)      |
| 8146115 | C8orf4          | 2.1090796 | up | chromosome 8 open reading frame 4                        |
| 8163618 | TNFSF15         | 2.1066651 | up | tumor necrosis factor (ligand) superfamily, member 15    |
| 8175393 | ARHGEF6         | 2.1059055 | up | Rac/Cdc42 guanine nucleotide exchange factor (GEF) 6     |
| 8115234 | ANXA6           | 2.105521  | up | annexin A6                                               |
| 8142194 | LAMB1           | 2.1016212 | up | laminin, beta 1                                          |
| 7921014 | MEF2D           | 2.1009617 | up | myocyte enhancer factor 2D                               |
| 8117890 | HLA-E           | 2.0996943 | up | major histocompatibility complex, class I, E             |
| 8095362 | MT2A            | 2.0995743 | up | metallothionein 2A                                       |
| 7925954 | NET1            | 2.0991626 | up | neuroepithelial cell transforming gene 1                 |
| 7970924 | STARD13         | 2.098889  | up | StAR-related lipid transfer (START) domain containing :  |
| 7935188 | SORBS1          | 2.0977073 | up | sorbin and SH3 domain containing 1                       |
| 7902127 | SGIP1           | 2.095828  | up | SH3-domain GRB2-like (endophilin) interacting protein    |
| 8040113 | DDEF2           | 2.0942476 | up | development and differentiation enhancing factor 2       |
| 8112890 | MED27 LOC4410:  | 2.092118  | up | mediator complex subunit 27   CRSP8 pseudogene           |
| 7922610 | ABL2            | 2.0919073 | up | v-abl Abelson murine leukemia viral oncogene homolo      |

Supplemental Table 1c  
eMSC vs. eSF

|         |                 |           |    |                                                           |
|---------|-----------------|-----------|----|-----------------------------------------------------------|
| 8157524 | TLR4            | 2.090969  | up | toll-like receptor 4                                      |
| 7977409 | CRIP1 LOC100127 | 2.0853202 | up | cysteine-rich protein 1 (intestinal)   hypothetical prote |
| 7951217 | MMP7            | 2.083918  | up | matrix metalloproteinase 7 (matrilysin, uterine)          |
| 8177717 | HLA-F           | 2.0701175 | up | major histocompatibility complex, class I, F              |
| 8055220 | A26C1A A26C1B   | 2.0697348 | up | ANKRD26-like family C, member 1A   ANKRD26-like far       |
| 8019183 | ACTG1           | 2.0696216 | up | actin, gamma 1                                            |
| 8044021 | IL1RL1          | 2.0677283 | up | interleukin 1 receptor-like 1                             |
| 8018754 | CYGB            | 2.0651805 | up | cytoglobin                                                |
| 8078262 | UBE2E1          | 2.0642874 | up | ubiquitin-conjugating enzyme E2E 1 (UBC4/5 homolog,       |
| 8179704 | IER3            | 2.063137  | up | immediate early response 3                                |
| 8145470 | DPYSL2          | 2.063026  | up | dihydropyrimidinase-like 2                                |
| 8046099 | NOSTRIN         | 2.0624971 | up | nitric oxide synthase trafficker                          |
| 8178498 | HLA-B HLA-C XXt | 2.05966   | up | major histocompatibility complex, class I, B   major his  |
| 8124848 | IER3            | 2.0586047 | up | immediate early response 3                                |
| 8175177 | MBNL3           | 2.0541399 | up | muscleblind-like 3 (Drosophila)                           |
| 8138504 | RAPGEF5         | 2.05276   | up | Rap guanine nucleotide exchange factor (GEF) 5            |
| 7946589 | MRVI1           | 2.05262   | up | murine retrovirus integration site 1 homolog              |
| 7944722 | UBASH3B         | 2.049892  | up | ubiquitin associated and SH3 domain containing, B         |
| 7949496 | CFL1            | 2.0444646 | up | cofilin 1 (non-muscle)                                    |
| 8055624 | ZEB2            | 2.04255   | up | zinc finger E-box binding homeobox 2                      |
| 8139212 | GLI3            | 2.0412016 | up |                                                           |
| 8081590 | PHLDB2          | 2.0410812 | up | pleckstrin homology-like domain, family B, member 2       |
| 8068651 | PCP4            | 2.0384986 | up | Purkinje cell protein 4                                   |
| 8062971 | DBNDD2 SYS1-DE  | 2.035556  | up | dysbindin (dystrobrevin binding protein 1) domain con     |
| 8106393 | F2R             | 2.0345387 | up | coagulation factor II (thrombin) receptor                 |
| 8092691 | BCL6            | 2.0332901 | up | B-cell CLL/lymphoma 6 (zinc finger protein 51)            |
| 8145151 | SORBS3          | 2.0322292 | up | sorbin and SH3 domain containing 3                        |
| 8095751 | DKFZP564O0823   | 2.0293887 | up |                                                           |
| 8080511 | CACNA1D         | 2.0287905 | up | calcium channel, voltage-dependent, L type, alpha 1D :    |
| 8047161 | OBFC2A          | 2.0285668 | up | oligonucleotide/oligosaccharide-binding fold containin    |
| 7942791 | LOC100008589 M  | 2.027841  | up | 28S ribosomal RNA   WD repeat domain 88                   |
| 8121601 | FAM26E          | 2.0223544 | up | family with sequence similarity 26, member E              |
| 7975121 | FNTB            | 2.021515  | up | farnesyltransferase, CAAX box, beta                       |

Supplemental Table 1c  
eMSC vs. eSF

|         |                   |           |    |                                                                    |
|---------|-------------------|-----------|----|--------------------------------------------------------------------|
| 8076046 | TMEM184B          | 2.0185661 | up | transmembrane protein 184B                                         |
| 8041206 | LBH               | 2.0139146 | up | limb bud and heart development homolog (mouse)                     |
| 8019263 | ARHGDI A          | 2.0134742 | up | Rho GDP dissociation inhibitor (GDI) alpha                         |
| 8113800 | FBN2              | 2.0115361 | up | fibrillin 2 (congenital contractural arachnodactyly)               |
| 7949765 | PPP1CA            | 2.0109499 | up | protein phosphatase 1, catalytic subunit, alpha isoform            |
| 7909027 | NFASC             | 2.0101683 | up | neurofascin homolog (chicken)                                      |
| 7962842 | ADCY6             | 2.009187  | up | adenylate cyclase 6                                                |
| 7944049 | SIDT2             | 2.0080767 | up | SID1 transmembrane family, member 2                                |
| 8161056 | TLN1              | 2.0007033 | up | talin 1                                                            |
| 8059576 | PID1              | 2.0006635 | up | phosphotyrosine interaction domain containing 1                    |
| 8044133 | NCK2              | 1.9963342 | up | NCK adaptor protein 2                                              |
| 8112045 | ESM1              | 1.9955448 | up | endothelial cell-specific molecule 1                               |
| 7977397 | CRIP2             | 1.9940779 | up | cysteine-rich protein 2                                            |
| 7977621 | NDRG2             | 1.9937127 | up | NDRG family member 2                                               |
| 8179019 | HLA-F             | 1.9925678 | up | major histocompatibility complex, class I, F                       |
| 8122464 | UTRN              | 1.9913532 | up | utrophin                                                           |
| 8122637 | SASH1             | 1.9898838 | up | SAM and SH3 domain containing 1                                    |
| 8162394 | ASPN              | 1.9897873 | up | asporin                                                            |
| 7920271 | S100A4            | 1.988163  | up | S100 calcium binding protein A4                                    |
| 7910792 | RYR2              | 1.9778935 | up | ryanodine receptor 2 (cardiac)                                     |
| 8064415 | C20orf46          | 1.9718333 | up | chromosome 20 open reading frame 46                                |
| 7927732 | ARID5B            | 1.9696845 | up | AT rich interactive domain 5B (MRF1-like)                          |
| 8090098 | MYLK              | 1.9689851 | up | myosin light chain kinase                                          |
| 7990054 | UACA              | 1.966884  | up | uveal autoantigen with coiled-coil domains and ankyrin             |
| 8018864 | SOCS3             | 1.9649345 | up | suppressor of cytokine signaling 3                                 |
| 8151816 | GEM               | 1.9619417 | up | GTP binding protein overexpressed in skeletal muscle               |
| 8117594 | HIST1H2BM         | 1.9611413 | up | histone cluster 1, H2bm                                            |
| 8071768 | SMARCB1           | 1.9608094 | up | SWI/SNF related, matrix associated, actin dependent repressor 1    |
| 8124911 | HLA-B   XXbac-BPG | 1.9573442 | up | major histocompatibility complex, class I, B   MHC class I chain B |
| 8127778 | FAM46A            | 1.9541731 | up | family with sequence similarity 46, member A                       |
| 8168146 | KIF4A             | 1.950998  | up | kinesin family member 4A                                           |
| 8076241 | MKL1              | 1.9498291 | up | megakaryoblastic leukemia (translocation) 1                        |
| 8138613 | OSBPL3            | 1.9462878 | up | oxysterol binding protein-like 3                                   |

Supplemental Table 1c  
eMSC vs. eSF

|         |                 |           |    |                                                                                                 |
|---------|-----------------|-----------|----|-------------------------------------------------------------------------------------------------|
| 8095376 | TMPRSS11E2 MT:  | 1.942508  | up | transmembrane protease, serine 11E2   metallothionein                                           |
| 8177725 | HLA-G HLA-A     | 1.9405876 | up | major histocompatibility complex, class I, G   major histocompatibility complex, class I, G     |
| 8162531 | MT1G            | 1.9393431 | up | metallothionein 1G                                                                              |
| 8045889 | TANC1           | 1.9386342 | up | tetratricopeptide repeat, ankyrin repeat and coiled-coil domain containing protein              |
| 8179034 | HLA-G HLA-A     | 1.9344604 | up | major histocompatibility complex, class I, G   major histocompatibility complex, class I, G     |
| 8157216 | UGCG            | 1.9331672 | up | UDP-glucose ceramide glucosyltransferase                                                        |
| 7919642 | HIST2H2AB       | 1.9320326 | up | histone cluster 2, H2ab                                                                         |
| 8065359 | CD93            | 1.9319493 | up |                                                                                                 |
| 8134263 | COL1A2          | 1.9293098 | up | collagen, type I, alpha 2                                                                       |
| 7930194 | CNNM2           | 1.9268819 | up | cyclin M2                                                                                       |
| 8049187 | EFHD1           | 1.925236  | up | EF-hand domain family, member D1                                                                |
| 7923824 | SLC41A1         | 1.9246026 | up | solute carrier family 41, member 1                                                              |
| 8059905 | COL6A3          | 1.9236023 | up | collagen, type VI, alpha 3                                                                      |
| 8109926 | GABRP           | 1.9204426 | up | gamma-aminobutyric acid (GABA) A receptor, pi                                                   |
| 8117372 | HIST1H2AC       | 1.9201809 | up | histone cluster 1, H2ac                                                                         |
| 8164252 | SH2D3C          | 1.917425  | up | SH2 domain containing 3C                                                                        |
| 7914648 | PHC2            | 1.9173082 | up | polyhomeotic homolog 2 (Drosophila)                                                             |
| 7974835 | PRKCH           | 1.9119427 | up | protein kinase C, eta                                                                           |
| 8144378 | AGPAT5          | 1.9102479 | up | 1-acylglycerol-3-phosphate O-acyltransferase 5 (lysophosphatidylcholine acyltransferase 5)      |
| 7955663 | TENC1           | 1.9092036 | up | tensin like C1 domain containing phosphatase (tensin 2)                                         |
| 8179731 | HLA-B HLA-C XXI | 1.9080225 | up | major histocompatibility complex, class I, B   major histocompatibility complex, class I, B     |
| 8078330 | RBMS3           | 1.9047432 | up | RNA binding motif, single stranded interacting protein                                          |
| 7918593 | RHOC            | 1.9026535 | up | ras homolog gene family, member C                                                               |
| 8042942 | HK2             | 1.9023948 | up | hexokinase 2                                                                                    |
| 7940160 | DTX4            | 1.900059  | up | deltex 4 homolog (Drosophila)                                                                   |
| 8169541 | DOCK11          | 1.8952537 | up | dedicator of cytokinesis 11                                                                     |
| 8057620 | COL5A2          | 1.8945831 | up | collagen, type V, alpha 2                                                                       |
| 7919340 | GJA5            | 1.894518  | up | gap junction protein, alpha 5, 40kDa                                                            |
| 8041422 | RASGRP3         | 1.8939102 | up | RAS guanyl releasing protein 3 (calcium and DAG-regulated guanine nucleotide exchange factor 3) |
| 7975095 | PLEKHG3         | 1.8915894 | up | pleckstrin homology domain containing, family G (with SH2 domain)                               |
| 8021169 | LIPG            | 1.8914498 | up | lipase, endothelial                                                                             |
| 8005235 | M-RIP           | 1.8883764 | up | myosin phosphatase-Rho interacting protein                                                      |
| 8058857 | IGFBP5          | 1.8876319 | up | insulin-like growth factor binding protein 5                                                    |

Supplemental Table 1c  
eMSC vs. eSF

|         |                 |           |    |                                                         |
|---------|-----------------|-----------|----|---------------------------------------------------------|
| 8027650 | UBA2            | 1.8875527 | up | ubiquitin-like modifier activating enzyme 2             |
| 8116921 | EDN1            | 1.8870931 | up | endothelin 1                                            |
| 8122807 | AKAP12          | 1.8868748 | up | A kinase (PRKA) anchor protein (gravin) 12              |
| 7985016 | SNX33           | 1.8858501 | up | sorting nexin 33                                        |
| 8178489 | HLA-C XXbac-BPG | 1.8815885 | up | major histocompatibility complex, class I, C   MHC clas |
| 7936028 | ACTR1A          | 1.879744  | up | ARP1 actin-related protein 1 homolog A, centractin alp  |
| 7951178 | TRPC6           | 1.8766477 | up | transient receptor potential cation channel, subfamily  |
| 8050007 | PXDN            | 1.8756461 | up | peroxidasin homolog (Drosophila)                        |
| 8025828 | LDLR            | 1.8743277 | up | low density lipoprotein receptor (familial hypercholest |
| 7953564 | C12orf57        | 1.8742478 | up | chromosome 12 open reading frame 57                     |
| 7954312 | SLCO1C1         | 1.8735882 | up | solute carrier organic anion transporter family, membe  |
| 7945132 | FLI1 EWSR1      | 1.8712735 | up | Friend leukemia virus integration 1   Ewing sarcoma br  |
| 8041048 | FOSL2           | 1.8680296 | up | FOS-like antigen 2                                      |
| 8158739 | LAMC3           | 1.8664268 | up | laminin, gamma 3                                        |
| 8029489 | BCAM            | 1.8591255 | up | basal cell adhesion molecule (Lutheran blood group)     |
| 8037005 | TGFB1           | 1.8577459 | up | transforming growth factor, beta 1                      |
| 7909332 | CD55            | 1.8569049 | up |                                                         |
| 8029950 | EHD2            | 1.8559618 | up | EH-domain containing 2                                  |
| 8100541 | IGFBP7          | 1.8537841 | up | insulin-like growth factor binding protein 7            |
| 8101957 | EMCN            | 1.8524816 | up | endomucin                                               |
| 8167815 | MAGED2          | 1.8511103 | up | melanoma antigen family D, 2                            |
| 8079037 | TRAK1           | 1.8482167 | up | trafficking protein, kinesin binding 1                  |
| 8117760 | HLA-F           | 1.8456802 | up | major histocompatibility complex, class I, F            |
| 8157804 | OLFML2A         | 1.8425599 | up | olfactomedin-like 2A                                    |
| 8124798 | KIAA1949        | 1.8404585 | up |                                                         |
| 7939376 | LDLRAD3         | 1.8404104 | up | low density lipoprotein receptor class A domain contai  |
| 8077376 | ITPR1           | 1.8396939 | up | inositol 1,4,5-triphosphate receptor, type 1            |
| 8042830 | MTHFD2          | 1.8337989 | up | methylenetetrahydrofolate dehydrogenase (NADP+ de       |
| 8104079 | FAT             | 1.8336695 | up |                                                         |
| 7969665 | HS6ST3 LOC1001. | 1.8324454 | up | heparan sulfate 6-O-sulfotransferase 3   similar to hep |
| 7923386 | LMOD1           | 1.8314424 | up | leiomodoin 1 (smooth muscle)                            |
| 8124280 | C6orf32         | 1.8303442 | up | chromosome 6 open reading frame 32                      |
| 7921821 | ADAMTS4         | 1.8303146 | up | ADAM metallopeptidase with thrombospondin type 1 i      |



Supplemental Table 1c  
eMSC vs. eSF

|         |                 |           |    |                                                          |
|---------|-----------------|-----------|----|----------------------------------------------------------|
| 7908072 | LAMC2           | 1.829595  | up | laminin, gamma 2                                         |
| 8115651 | GABRB2          | 1.8295242 | up | gamma-aminobutyric acid (GABA) A receptor, beta 2        |
| 7948229 | SLC43A3         | 1.8286165 | up | solute carrier family 43, member 3                       |
| 8097586 | GAB1            | 1.8283556 | up | GRB2-associated binding protein 1                        |
| 8122222 | PDE7B           | 1.8272887 | up | phosphodiesterase 7B                                     |
| 7903592 | KIAA1324        | 1.8272578 | up |                                                          |
| 8043203 | VAMP5           | 1.8262485 | up | vesicle-associated membrane protein 5 (myobrevin)        |
| 8042283 | HSPC159         | 1.8256902 | up | galectin-related protein                                 |
| 8083221 | PBX2            | 1.8250637 | up | pre-B-cell leukemia homeobox 2                           |
| 8127201 | COL21A1         | 1.8229003 | up | collagen, type XXI, alpha 1                              |
| 8150698 | SNAI2           | 1.8227245 | up | snail homolog 2 (Drosophila)                             |
| 7952243 | C1QTNF5 MFRP    | 1.82085   | up | C1q and tumor necrosis factor related protein 5   men    |
| 7928558 | ZMIZ1           | 1.8199722 | up | zinc finger, MIZ-type containing 1                       |
| 7964388 | NDUFA4L2        | 1.8172045 | up | NADH dehydrogenase (ubiquinone) 1 alpha subcomple        |
| 8156278 | S1PR3 C9orf47   | 1.8162569 | up | sphingosine-1-phosphate receptor 3   chromosome 9 c      |
| 8063000 | WFDC2           | 1.8124909 | up | WAP four-disulfide core domain 2                         |
| 7981142 | CLMN            | 1.8119558 | up | calmin (calponin-like, transmembrane)                    |
| 8149774 | LOXL2 ENTPD4    | 1.8117294 | up | lysyl oxidase-like 2   ectonucleoside triphosphate diph  |
| 8124380 | HIST1H1A        | 1.8078032 | up | histone cluster 1, H1a                                   |
| 8124901 | HLA-C XXbac-BPG | 1.8046596 | up | major histocompatibility complex, class I, C   MHC clas  |
| 8015635 | PTRF            | 1.7965335 | up | polymerase I and transcript release factor               |
| 8007323 | CNTNAP1         | 1.7946258 | up | contactin associated protein 1                           |
| 7962516 | SLC38A1         | 1.7880169 | up | solute carrier family 38, member 1                       |
| 7964872 | PTPRB           | 1.787664  | up | protein tyrosine phosphatase, receptor type, B           |
| 7946142 | PRKCDBP         | 1.7866553 | up | protein kinase C, delta binding protein                  |
| 8156848 | NR4A3           | 1.786201  | up | nuclear receptor subfamily 4, group A, member 3          |
| 7952641 | RICS            | 1.7855401 | up | Rho GTPase-activating protein                            |
| 7965040 | PHLDA1          | 1.7848444 | up | pleckstrin homology-like domain, family A, member 1      |
| 7960464 | VWF             | 1.7838453 | up | von Willebrand factor                                    |
| 8100393 | KDR             | 1.7828094 | up | kinase insert domain receptor (a type III receptor tyros |
| 7947230 | BDNF            | 1.7823644 | up | brain-derived neurotrophic factor                        |
| 8091867 | BCHE            | 1.7806617 | up | butyrylcholinesterase                                    |
| 8029006 | AXL             | 1.7769861 | up |                                                          |

Supplemental Table 1c  
eMSC vs. eSF

|         |          |           |    |                                                         |
|---------|----------|-----------|----|---------------------------------------------------------|
| 8143188 | CREB3L2  | 1.7740662 | up | cAMP responsive element binding protein 3-like 2        |
| 7953981 | ETV6     | 1.772696  | up | ets variant gene 6 (TEL oncogene)                       |
| 7995206 | TGFB11   | 1.7722074 | up | transforming growth factor beta 1 induced transcript 1  |
| 8034021 | CDC37    | 1.7702639 | up | cell division cycle 37 homolog ( <i>S. cerevisiae</i> ) |
| 8069301 | COL6A2   | 1.7698538 | up | collagen, type VI, alpha 2                              |
| 8037374 | PLAUR    | 1.7653518 | up | plasminogen activator, urokinase receptor               |
| 8019912 | EMILIN2  | 1.7650303 | up | elastin microfibril interfacier 2                       |
| 7996837 | CDH1     | 1.7643226 | up | cadherin 1, type 1, E-cadherin (epithelial)             |
| 8047272 | LOC26010 | 1.7611083 | up | viral DNA polymerase-transactivated protein 6           |
| 8131631 | HDAC9    | 1.7584686 | up | histone deacetylase 9                                   |
| 8005847 | TNFAIP1  | 1.7576624 | up | tumor necrosis factor, alpha-induced protein 1 (endotr  |
| 8083240 | AGTR1    | 1.7571983 | up | angiotensin II receptor, type 1                         |
| 8178193 | HLA-DRA  | 1.7568488 | up | major histocompatibility complex, class II, DR alpha    |
| 8037847 | AP2S1    | 1.7531459 | up | adaptor-related protein complex 2, sigma 1 subunit      |
| 8025672 | SLC44A2  | 1.7526518 | up | solute carrier family 44, member 2                      |
| 7944493 | CBL      | 1.7524275 | up | Cas-Br-M (murine) ecotropic retroviral transforming se  |
| 8035465 | ISYNA1   | 1.7519841 | up | myo-inositol 1-phosphate synthase A1                    |
| 7977452 | FLJ39632 | 1.7517658 | up | hypothetical LOC642477                                  |
| 8099685 | LGI2     | 1.7492349 | up | leucine-rich repeat LGI family, member 2                |
| 8035980 | RHPN2    | 1.7489182 | up | rhophilin, Rho GTPase binding protein 2                 |
| 8017867 | FAM20A   | 1.748864  | up | family with sequence similarity 20, member A            |
| 7903214 | LPPR4    | 1.7480391 | up | plasticity related gene 1                               |
| 8167965 | MSN      | 1.747439  | up | moesin                                                  |
| 8130867 | THBS2    | 1.747045  | up | thrombospondin 2                                        |
| 8002403 | ABBA-1   | 1.7438357 | up | actin-bundling protein with BAIAP2 homology             |
| 7954997 | TMEM16F  | 1.7437259 | up | transmembrane protein 16F                               |
| 8065353 | THBD     | 1.7421072 | up | thrombomodulin                                          |
| 7969414 | KLF5     | 1.7412387 | up | Kruppel-like factor 5 (intestinal)                      |
| 7968417 | FRY      | 1.7354829 | up | furry homolog ( <i>Drosophila</i> )                     |
| 8058390 | RAPH1    | 1.7331915 | up | Ras association (RalGDS/AF-6) and pleckstrin homology   |
| 8032730 | EEF2     | 1.7309141 | up | eukaryotic translation elongation factor 2              |
| 7996677 | NUTF2    | 1.7296487 | up | nuclear transport factor 2                              |
| 8125360 | PBX2     | 1.7275283 | up | pre-B-cell leukemia homeobox 2                          |

Supplemental Table 1c  
eMSC vs. eSF

|         |                 |           |    |                                                          |
|---------|-----------------|-----------|----|----------------------------------------------------------|
| 7925320 | NID1            | 1.7256848 | up | nidogen 1                                                |
| 8113220 | ELL2            | 1.7239249 | up | elongation factor, RNA polymerase II, 2                  |
| 7965335 | DUSP6           | 1.7213925 | up | dual specificity phosphatase 6                           |
| 7931479 | INPP5A          | 1.7209221 | up | inositol polyphosphate-5-phosphatase, 40kDa              |
| 8000375 | ARHGAP17        | 1.7204086 | up | Rho GTPase activating protein 17                         |
| 8016646 | COL1A1          | 1.7196897 | up | collagen, type I, alpha 1                                |
| 8074168 | FLJ39632        | 1.7195274 | up | hypothetical LOC642477                                   |
| 7906564 | PEA15           | 1.7174582 | up | phosphoprotein enriched in astrocytes 15                 |
| 8089112 | FILIP1L         | 1.7155586 | up | filamin A interacting protein 1-like                     |
| 8025918 | CNN1            | 1.7130682 | up | calponin 1, basic, smooth muscle                         |
| 7973067 | NP              | 1.7121533 | up | nucleoside phosphorylase                                 |
| 7899043 | SEPN1           | 1.710329  | up | selenoprotein N, 1                                       |
| 7899627 | TINAGL1         | 1.7101942 | up | tubulointerstitial nephritis antigen-like 1              |
| 8149413 | DLC1            | 1.7099311 | up | deleted in liver cancer 1                                |
| 8054135 | MGAT4A          | 1.7049423 | up | mannosyl (alpha-1,3-)-glycoprotein beta-1,4-N-acetylgl   |
| 8117422 | HIST1H4F HIST4H | 1.7034954 | up | histone cluster 1, H4f   histone cluster 4, H4   histone |
| 8148040 | MAL2            | 1.7019982 | up | mal, T-cell differentiation protein 2                    |
| 8179041 | HLA-A HLA-H HLA | 1.7017447 | up | major histocompatibility complex, class I, A   major his |
| 8152867 | DDEF1           | 1.7016345 | up | development and differentiation enhancing factor 1       |
| 8133459 | CLIP2           | 1.7009007 | up | CAP-GLY domain containing linker protein 2               |
| 7954029 | CDKN1B          | 1.6986095 | up | cyclin-dependent kinase inhibitor 1B (p27, Kip1)         |
| 8007620 | GRN             | 1.6983244 | up | granulin                                                 |
| 8100994 | CXCL2           | 1.6959139 | up | chemokine (C-X-C motif) ligand 2                         |
| 7979824 | ACTN1           | 1.6952794 | up | actinin, alpha 1                                         |
| 8091283 | PLOD2           | 1.6950853 | up | procollagen-lysine, 2-oxoglutarate 5-dioxygenase 2       |
| 7971159 | TNAP            | 1.6922358 | up | TRAFs and NIK-associated protein                         |
| 8048995 | ITM2C           | 1.6859224 | up | integral membrane protein 2C                             |
| 8030383 | RCN3            | 1.6855793 | up | reticulocalbin 3, EF-hand calcium binding domain         |
| 8153002 | NDRG1           | 1.6839536 | up | N-myc downstream regulated gene 1                        |
| 7902874 | LRRRC8C         | 1.6824121 | up | leucine rich repeat containing 8 family, member C        |
| 8122860 | MYCT1           | 1.6817235 | up | myc target 1                                             |
| 7968800 | DGKH            | 1.6813006 | up | diacylglycerol kinase, eta                               |
| 7933488 | C10orf72        | 1.6798122 | up | chromosome 10 open reading frame 72                      |

Supplemental Table 1c  
eMSC vs. eSF

|         |              |           |    |                                                               |
|---------|--------------|-----------|----|---------------------------------------------------------------|
| 8095854 | 41163        | 1.6787965 | up | septin 11                                                     |
| 8161648 | KLF9         | 1.6786814 | up | Kruppel-like factor 9                                         |
| 8124397 | HIST1H1C     | 1.6775099 | up | histone cluster 1, H1c                                        |
| 7991186 | NTRK3        | 1.6736617 | up | neurotrophic tyrosine kinase, receptor, type 3                |
| 8099259 | AFAP1        | 1.6654863 | up | actin filament associated protein 1                           |
| 7966202 | KCTD10       | 1.664476  | up | potassium channel tetramerisation domain containing           |
| 8083677 | SCHIP1       | 1.6636251 | up | schwannomin interacting protein 1                             |
| 8026407 | SYDE1        | 1.6632262 | up | synapse defective 1, Rho GTPase, homolog 1 (C. elegar         |
| 8127051 | TRAM2        | 1.6618129 | up | translocation associated membrane protein 2                   |
| 7903358 | VCAM1        | 1.6613919 | up | vascular cell adhesion molecule 1                             |
| 8123609 | SERPINB9     | 1.6605725 | up | serpin peptidase inhibitor, clade B (ovalbumin), memb         |
| 7936856 | GALNAC4S-6ST | 1.6600593 | up | B cell RAG associated protein                                 |
| 8002692 | ZFHX3        | 1.6578994 | up | zinc finger homeobox 3                                        |
| 7908694 | NAV1         | 1.657404  | up | neuron navigator 1                                            |
| 8087337 | LAMB2        | 1.6570746 | up | laminin, beta 2 (laminin S)                                   |
| 8092707 | LEPREL1      | 1.6566936 | up | leprecan-like 1                                               |
| 8161044 | TPM2         | 1.653037  | up | tropomyosin 2 (beta)                                          |
| 7952046 | MPZL2        | 1.6481969 | up | myelin protein zero-like 2                                    |
| 7966135 | CORO1C       | 1.647519  | up | coronin, actin binding protein, 1C                            |
| 8143397 | DENND2A      | 1.6465315 | up | DENN/MADD domain containing 2A                                |
| 7926875 | BAMBI        | 1.6457813 | up | BMP and activin membrane-bound inhibitor homolog (            |
| 7965510 | TMCC3        | 1.644911  | up | transmembrane and coiled-coil domain family 3                 |
| 8118548 | HLA-DRA      | 1.6439649 | up | major histocompatibility complex, class II, DR alpha          |
| 8049317 | DGKD         | 1.6393698 | up | diacylglycerol kinase, delta 130kDa                           |
| 8179481 | HLA-DRA      | 1.6388469 | up | major histocompatibility complex, class II, DR alpha          |
| 8058765 | FN1          | 1.6387402 | up | fibronectin 1                                                 |
| 8142585 | CADPS2       | 1.6381509 | up | Ca <sup>2+</sup> -dependent activator protein for secretion 2 |
| 8038347 | TEAD2        | 1.6381283 | up | TEA domain family member 2                                    |
| 8021181 | SCARNA17     | 1.6376927 | up | small Cajal body-specific RNA 17                              |
| 8171172 | MXRA5        | 1.6351061 | up | matrix-remodelling associated 5                               |
| 8090433 | MGLL         | 1.63438   | up | monoglyceride lipase                                          |
| 8037614 | GPR4         | 1.6336464 | up | G protein-coupled receptor 4                                  |
| 8130505 | EZR          | 1.631267  | up | ezrin                                                         |

## Supplemental Table 1c

eMSC vs. eSF

|         |                  |           |    |                                                                           |
|---------|------------------|-----------|----|---------------------------------------------------------------------------|
| 8135705 | KCND2            | 1.6309555 | up | potassium voltage-gated channel, Shal-related subfam                      |
| 8043909 | NPAS2            | 1.6280336 | up | neuronal PAS domain protein 2                                             |
| 8134030 | STEAP1           | 1.6275959 | up | six transmembrane epithelial antigen of the prostate 1                    |
| 7997582 | WFDC1            | 1.626996  | up | WAP four-disulfide core domain 1                                          |
| 8092578 | ETV5             | 1.6259456 | up | ets variant gene 5 (ets-related molecule)                                 |
| 7996264 | CDH5             | 1.6245813 | up | cadherin 5, type 2, VE-cadherin (vascular epithelium)                     |
| 7957665 | ELK3             | 1.6207443 | up |                                                                           |
| 7993310 | MKL2             | 1.6205052 | up | MKL/myocardin-like 2                                                      |
| 8079140 | SNRK             | 1.6202749 | up | SNF related kinase                                                        |
| 8153449 | EEF1D            | 1.6183072 | up | eukaryotic translation elongation factor 1 delta (guanir                  |
| 7946401 | ST5              | 1.6175202 | up | suppression of tumorigenicity 5                                           |
| 7906061 | SYT11            | 1.6170549 | up | synaptotagmin XI                                                          |
| 7980720 | TTC7B            | 1.6170255 | up | tetratricopeptide repeat domain 7B                                        |
| 8058221 | TRAK2            | 1.6160722 | up | trafficking protein, kinesin binding 2                                    |
| 8101788 | UNC5C            | 1.6143875 | up | unc-5 homolog C (C. elegans)                                              |
| 8043197 | VAMP8            | 1.6143305 | up | vesicle-associated membrane protein 8 (endobrevin)                        |
| 7904254 | ATP1A1           | 1.6133773 | up | ATPase, Na <sup>+</sup> /K <sup>+</sup> transporting, alpha 1 polypeptide |
| 8088776 | FOXP1            | 1.6111256 | up | forkhead box P1                                                           |
| 8105040 | OSMR             | 1.6109047 | up | oncostatin M receptor                                                     |
| 8124430 | HIST1H1D         | 1.6090447 | up | histone cluster 1, H1d                                                    |
| 8021047 | SETBP1           | 1.6055216 | up | SET binding protein 1                                                     |
| 7963567 | KRT8             | 1.6035014 | up | keratin 8                                                                 |
| 8114050 | 41160            | 1.6029515 | up | septin 8                                                                  |
| 8169473 | PLS3             | 1.6009253 | up | plastin 3 (T isoform)                                                     |
| 7991406 | PRC1             | 1.600503  | up | protein regulator of cytokinesis 1                                        |
| 8145977 | PLEKHA2          | 1.5986848 | up | pleckstrin homology domain containing, family A (phos                     |
| 7924058 | IRF6             | 1.5975307 | up | interferon regulatory factor 6                                            |
| 7945573 | POLR2L           | 1.5905774 | up | polymerase (RNA) II (DNA directed) polypeptide L, 7.6k                    |
| 8062623 | PLCG1            | 1.5892599 | up | phospholipase C, gamma 1                                                  |
| 8117813 | HLA-H HLA-A HLA- | 1.5890172 | up | major histocompatibility complex, class I, H (pseudoge                    |
| 8062852 | PKIG             | 1.5877773 | up | protein kinase (cAMP-dependent, catalytic) inhibitor g                    |
| 8176323 | IL3RA            | 1.5863535 | up | interleukin 3 receptor, alpha (low affinity)                              |
| 7958253 | OCC-1            | 1.5843393 | up | overexpressed in colon carcinoma-1                                        |

Supplemental Table 1c  
eMSC vs. eSF

|         |                 |           |    |                                                           |
|---------|-----------------|-----------|----|-----------------------------------------------------------|
| 7968015 | TNFRSF19        | 1.580715  | up | tumor necrosis factor receptor superfamily, member 1      |
| 8152119 | NCALD           | 1.580184  | up | neurocalcin delta                                         |
| 7915147 | FHL3            | 1.5801448 | up | four and a half LIM domains 3                             |
| 7983228 | MAP1A           | 1.5790582 | up | microtubule-associated protein 1A                         |
| 8020495 | CABLES1         | 1.5762289 | up | Cdk5 and Abl enzyme substrate 1                           |
| 8165752 | IL3RA           | 1.5752832 | up | interleukin 3 receptor, alpha (low affinity)              |
| 8039144 | TMC4            | 1.5734074 | up | transmembrane channel-like 4                              |
| 7935660 | DNMBP           | 1.5724646 | up | dynamamin binding protein                                 |
| 8086953 | SHISA5          | 1.5723387 | up | shisa homolog 5 ( <i>Xenopus laevis</i> )                 |
| 8117402 | HIST1H4E HIST4H | 1.571726  | up | histone cluster 1, H4e   histone cluster 4, H4   histone  |
| 8080810 | PTPRG           | 1.5711734 | up | protein tyrosine phosphatase, receptor type, G            |
| 7975361 | KIAA0247        | 1.5709026 | up |                                                           |
| 7916584 | TACSTD2         | 1.5697399 | up | tumor-associated calcium signal transducer 2              |
| 7921344 | ELL2            | 1.5671507 | up | elongation factor, RNA polymerase II, 2                   |
| 8009502 | KCNJ2           | 1.5668508 | up | potassium inwardly-rectifying channel, subfamily J, me    |
| 8178867 | TAP1            | 1.5665005 | up | transporter 1, ATP-binding cassette, sub-family B (MDF    |
| 8180061 | TAP1            | 1.5659615 | up | transporter 1, ATP-binding cassette, sub-family B (MDF    |
| 8125512 | TAP1            | 1.5652269 | up | transporter 1, ATP-binding cassette, sub-family B (MDF    |
| 8109773 | WWC1            | 1.5647879 | up | WW and C2 domain containing 1                             |
| 7969736 | FARP1           | 1.5620645 | up | FERM, RhoGEF (ARHGEF) and pleckstrin domain protei        |
| 7951977 | FXVD6           | 1.5615313 | up | FXVD domain containing ion transport regulator 6          |
| 8170119 | FHL1            | 1.561168  | up | four and a half LIM domains 1                             |
| 8092726 | CLDN1           | 1.5610077 | up | claudin 1                                                 |
| 8132557 | AEBP1           | 1.5603983 | up | AE binding protein 1                                      |
| 7986049 | CRTC3           | 1.5585915 | up | CREB regulated transcription coactivator 3                |
| 8075310 | LIF             | 1.55827   | up | leukemia inhibitory factor (cholinergic differentiation f |
| 7968976 | LRCH1           | 1.5572685 | up | leucine-rich repeats and calponin homology (CH) doma      |
| 8167006 | RP2             | 1.5542892 | up | retinitis pigmentosa 2 (X-linked recessive)               |
| 8017210 | AP1S2 LOC65365  | 1.5542327 | up | adaptor-related protein complex 1, sigma 2 subunit   f    |
| 7897803 | PLOD1 LOC10013  | 1.5497515 | up | procollagen-lysine 1, 2-oxoglutarate 5-dioxygenase 1      |
| 7920128 | S100A11         | 1.5489882 | up | S100 calcium binding protein A11                          |
| 8117777 | HLA-G HLA-A HLA | 1.5481989 | up | major histocompatibility complex, class I, G   major his  |
| 8096704 | NPNT            | 1.547709  | up | nephronectin                                              |

Supplemental Table 1c  
eMSC vs. eSF

|         |                  |           |    |                                                                |
|---------|------------------|-----------|----|----------------------------------------------------------------|
| 8129120 | C6orf189         | 1.5473055 | up | chromosome 6 open reading frame 189                            |
| 7996947 | CYB5B            | 1.5461415 | up | cytochrome b5 type B (outer mitochondrial membrane             |
| 8095680 | IL8              | 1.5442426 | up | interleukin 8                                                  |
| 8034151 | DOCK6            | 1.5440972 | up | dedicator of cytokinesis 6                                     |
| 7905929 | EFNA1            | 1.5439649 | up | ephrin-A1                                                      |
| 8105908 | OCLN             | 1.5408137 | up | occludin                                                       |
| 8128737 | MICAL1           | 1.540494  | up | microtubule associated monooxygenase, calponin and L           |
| 8085774 | ZNF385D          | 1.5404108 | up | zinc finger protein 385D                                       |
| 7927694 | PHYHIPL          | 1.5399613 | up | phytanoyl-CoA 2-hydroxylase interacting protein-like           |
| 7904131 | DCLRE1B          | 1.5393283 | up | DNA cross-link repair 1B (PSO2 homolog, <i>S. cerevisiae</i> ) |
| 8073775 | FBLN1            | 1.5382314 | up | fibulin 1                                                      |
| 8129562 | CTGF             | 1.536263  | up | connective tissue growth factor                                |
| 7970810 | SLC7A1           | 1.5354359 | up | solute carrier family 7 (cationic amino acid transporter       |
| 7928444 | VCL              | 1.5354155 | up | vinculin                                                       |
| 8179049 | HLA-A HLA-B HLA- | 1.5350372 | up | major histocompatibility complex, class I, A   major his       |
| 7947199 | LGR4             | 1.5345975 | up | leucine-rich repeat-containing G protein-coupled recep         |
| 8133860 | GNAI1            | 1.533243  | up | guanine nucleotide binding protein (G protein), alpha i        |
| 7909610 | ATF3             | 1.5324345 | up | activating transcription factor 3                              |
| 8089261 | CBLB             | 1.5320276 | up | Cas-Br-M (murine) ecotropic retroviral transforming se         |
| 8127346 | RAB23            | 1.5303867 | up |                                                                |
| 7908204 | HMCN1            | 1.529041  | up | hemicentin 1                                                   |
| 7995258 | ZNF267           | 1.5287695 | up | zinc finger protein 267                                        |
| 8029693 | FOSB             | 1.5279554 | up | FBJ murine osteosarcoma viral oncogene homolog B               |
| 7922229 | SELE             | 1.5259551 | up | selectin E (endothelial adhesion molecule 1)                   |
| 8156199 | DAPK1            | 1.5256271 | up | death-associated protein kinase 1                              |
| 8120428 | FKBP1A FKBP1C    | 1.5247582 | up | FK506 binding protein 1A, 12kDa   FK506 binding prote          |
| 8132055 | C7orf41          | 1.5245616 | up | chromosome 7 open reading frame 41                             |
| 8098204 | CPE              | 1.5243999 | up | carboxypeptidase E                                             |
| 7969288 | OLFM4            | 1.5241657 | up | olfactomedin 4                                                 |
| 7920600 | SHC1             | 1.5214868 | up | SHC (Src homology 2 domain containing) transforming            |
| 7927964 | SRGN             | 1.5200047 | up | serglycin                                                      |
| 7979671 | MAX              | 1.5194159 | up | MYC associated factor X                                        |
| 7909568 | DTL              | 1.5185525 | up | denticleless homolog ( <i>Drosophila</i> )                     |

Supplemental Table 1c  
eMSC vs. eSF

|         |                |           |    |                                                                          |
|---------|----------------|-----------|----|--------------------------------------------------------------------------|
| 8065280 | C20orf74       | 1.5182968 | up | chromosome 20 open reading frame 74                                      |
| 7948662 | SCGB1D4        | 1.5182588 | up | secretoglobin, family 1D, member 4                                       |
| 7908793 | ELF3           | 1.5180103 | up | E74-like factor 3 (ets domain transcription factor, epithelial)          |
| 8046086 | LASS6          | 1.517858  | up | LAG1 homolog, ceramide synthase 6                                        |
| 8116272 | ADAMTS2        | 1.5175644 | up | ADAM metalloproteinase with thrombospondin type 1 motifs                 |
| 7936242 | KIAA1754       | 1.5165125 | up |                                                                          |
| 8129458 | ARHGAP18       | 1.5140382 | up | Rho GTPase activating protein 18                                         |
| 7921713 | F11R hCG_20857 | 1.511581  | up | F11 receptor   hypothetical protein LOC100134860   K                     |
| 7943998 | NNMT           | 1.510824  | up | nicotinamide N-methyltransferase                                         |
| 7928046 | TSPAN15        | 1.5106013 | up | tetraspanin 15                                                           |
| 7929388 | PLCE1          | 1.5101597 | up | phospholipase C, epsilon 1                                               |
| 7956551 | GEFT SLC26A10  | 1.5098661 | up | RhoA/RAC/CDC42 exchange factor   solute carrier family 26                |
| 8049512 | LRRFIP1        | 1.5089555 | up | leucine rich repeat (in FLII) interacting protein 1                      |
| 8014706 | PCGF2          | 1.507607  | up | polycomb group ring finger 2                                             |
| 8107307 | CAMK4          | 1.506706  | up | calcium/calmodulin-dependent protein kinase IV                           |
| 7902913 | CDC7           | 1.5065349 | up | cell division cycle 7 homolog ( <i>S. cerevisiae</i> )                   |
| 8115327 | SPARC          | 1.5047215 | up | secreted protein, acidic, cysteine-rich (osteonectin)                    |
| 7953040 | CACNA1C        | 1.502537  | up | calcium channel, voltage-dependent, L type, alpha 1C subunit             |
| 7974689 | DACT1          | 1.5021725 | up | dapper, antagonist of beta-catenin, homolog 1 ( <i>Xenopus</i> )         |
| 8178590 | DDAH2          | 1.5017656 | up | dimethylarginine dimethylaminohydrolase 2                                |
| 7938370 | SWAP70         | 1.5009346 | up | SWAP-70 protein                                                          |
| 8083136 | ATP1B3         | 1.4990706 | up | ATPase, Na <sup>+</sup> /K <sup>+</sup> transporting, beta 3 polypeptide |
| 8001099 | HERC2P4        | 1.4990445 | up | hect domain and RLD 2 pseudogene 4                                       |
| 7955637 | KRT18          | 1.4969816 | up | keratin 18                                                               |
| 8006736 | DUSP14         | 1.4967438 | up | dual specificity phosphatase 14                                          |
| 8179819 | DDAH2          | 1.4960283 | up | dimethylarginine dimethylaminohydrolase 2                                |
| 7964579 | CTDSP2         | 1.4943835 | up | CTD (carboxy-terminal domain, RNA polymerase II, pol II)                 |
| 7984079 | TPM1           | 1.4937546 | up | tropomyosin 1 (alpha)                                                    |
| 8108301 | KIF20A         | 1.4927716 | up | kinesin family member 20A                                                |
| 7912750 | FBXO42         | 1.4924821 | up | F-box protein 42                                                         |
| 7958749 | SH2B3          | 1.4921955 | up | SH2B adaptor protein 3                                                   |
| 7968678 | FREM2          | 1.4899677 | up | FRAS1 related extracellular matrix protein 2                             |
| 8170891 | GDI1           | 1.489886  | up | GDP dissociation inhibitor 1                                             |



Supplemental Table 1c  
eMSC vs. eSF

|         |          |           |    |                                                           |
|---------|----------|-----------|----|-----------------------------------------------------------|
| 8163775 | MEGF9    | 1.4898415 | up | multiple EGF-like-domains 9                               |
| 8145055 | BMP1     | 1.488354  | up | bone morphogenetic protein 1                              |
| 7975889 | VASH1    | 1.4870576 | up | vasohibin 1                                               |
| 8015590 | STAT5B   | 1.4869668 | up | signal transducer and activator of transcription 5B       |
| 7936516 | HSPA12A  | 1.486853  | up | heat shock 70kDa protein 12A                              |
| 7918973 | SPAG17   | 1.4866306 | up | sperm associated antigen 17                               |
| 8050537 | MATN3    | 1.4864944 | up | matrilin 3                                                |
| 8153021 | ST3GAL1  | 1.4863886 | up | ST3 beta-galactoside alpha-2,3-sialyltransferase 1        |
| 7963157 | RACGAP1  | 1.4862401 | up | Rac GTPase activating protein 1                           |
| 7973709 | NFATC4   | 1.4861575 | up | nuclear factor of activated T-cells, cytoplasmic, calcine |
| 7979204 | FERMT2   | 1.4860985 | up | fermitin family homolog 2 (Drosophila)                    |
| 8096415 | MMRN1    | 1.4858472 | up | multimerin 1                                              |
| 8155707 | TJP2     | 1.4856488 | up | tight junction protein 2 (zona occludens 2)               |
| 8056545 | STK39    | 1.4854864 | up | serine threonine kinase 39 (STE20/SPS1 homolog, yeas      |
| 7999468 | LITAF    | 1.4834194 | up | lipopolysaccharide-induced TNF factor                     |
| 7907079 | RCSL1    | 1.4800982 | up | RCSL domain containing 1                                  |
| 7962146 | FAM60A   | 1.4789877 | up | family with sequence similarity 60, member A              |
| 8105585 | RNF180   | 1.4777486 | up | ring finger protein 180                                   |
| 8077490 | LMCD1    | 1.4776205 | up | LIM and cysteine-rich domains 1                           |
| 8014233 | SLFN11   | 1.4768554 | up | schlafen family member 11                                 |
| 8164665 | RAPGEF1  | 1.4762412 | up | Rap guanine nucleotide exchange factor (GEF) 1            |
| 8122426 | PHACTR2  | 1.4753999 | up | phosphatase and actin regulator 2                         |
| 8010139 | SEC14L1  | 1.4739227 | up | SEC14-like 1 (S. cerevisiae)                              |
| 7954527 | ARNTL2   | 1.4727263 | up | aryl hydrocarbon receptor nuclear translocator-like 2     |
| 7972021 | TBC1D4   | 1.4713734 | up | TBC1 domain family, member 4                              |
| 8109283 | NDST1    | 1.4712464 | up | N-deacetylase/N-sulfotransferase (heparan glucosaminir    |
| 7966026 | NUAK1    | 1.4689808 | up | NUAK family, SNF1-like kinase, 1                          |
| 7900365 | MFSD2    | 1.4670385 | up | major facilitator superfamily domain containing 2         |
| 7993458 | C16orf45 | 1.4670334 | up | chromosome 16 open reading frame 45                       |
| 8117630 | ZNF165   | 1.4654378 | up | zinc finger protein 165                                   |
| 7987385 | MEIS2    | 1.4651332 | up | Meis homeobox 2                                           |
| 8042211 | B3GNT2   | 1.464684  | up | UDP-GlcNAc:betaGal beta-1,3-N-acetylglucosaminyltra       |
| 8046695 | ITGA4    | 1.4638195 | up | integrin, alpha 4 (antigen CD49D, alpha 4 subunit of VL   |

Supplemental Table 1c  
eMSC vs. eSF

|         |                |           |    |                                                         |
|---------|----------------|-----------|----|---------------------------------------------------------|
| 7942596 | SERPINH1       | 1.4615766 | up | serpin peptidase inhibitor, clade H (heat shock protein |
| 8037505 | TRAPPC6A       | 1.4602675 | up | trafficking protein particle complex 6A                 |
| 8087485 | UBA7           | 1.4592215 | up | ubiquitin-like modifier activating enzyme 7             |
| 7953409 | PTMS           | 1.4588145 | up | parathyrosin                                            |
| 8060897 | PLCB4          | 1.458389  | up | phospholipase C, beta 4                                 |
| 7973336 | MMP14          | 1.4576819 | up | matrix metalloproteinase 14 (membrane-inserted)         |
| 8072876 | LGALS1         | 1.4571669 | up | lectin, galactoside-binding, soluble, 1 (galectin 1)    |
| 7956819 | RASSF3         | 1.4562749 | up | Ras association (RalGDS/AF-6) domain family member      |
| 7966929 | RAB35          | 1.4555604 | up |                                                         |
| 7944302 | PHLDB1         | 1.4527357 | up | pleckstrin homology-like domain, family B, member 1     |
| 8180166 | TAPBP          | 1.4515986 | up | TAP binding protein (tapasin)                           |
| 8112615 | ENC1           | 1.4514025 | up | ectodermal-neural cortex (with BTB-like domain)         |
| 8066493 | SLPI           | 1.4498422 | up | secretory leukocyte peptidase inhibitor                 |
| 7940643 | ASRGL1         | 1.4495007 | up | asparaginase like 1                                     |
| 7946579 | LYVE1          | 1.4491389 | up | lymphatic vessel endothelial hyaluronan receptor 1      |
| 8147206 | RIPK2          | 1.4478089 | up | receptor-interacting serine-threonine kinase 2          |
| 7994280 | IL4R           | 1.4473832 | up | interleukin 4 receptor                                  |
| 8019737 | KPNA2 LOC72886 | 1.4452349 | up | karyopherin alpha 2 (RAG cohort 1, importin alpha 1)    |
| 8044919 | RALB           | 1.4443871 | up | v-ral simian leukemia viral oncogene homolog B (ras re  |
| 8141459 | GAL3ST4        | 1.4442302 | up | galactose-3-O-sulfotransferase 4                        |
| 8114733 | CENTD3         | 1.4429212 | up | centaurin, delta 3                                      |
| 8048205 | IGFBP2         | 1.4428991 | up | insulin-like growth factor binding protein 2, 36kDa     |
| 8143279 | ZC3HAV1        | 1.4410082 | up | zinc finger CCCH-type, antiviral 1                      |
| 7991335 | ANPEP          | 1.4398123 | up | alanine aminopeptidase (aminopeptidase N                |
| 8135601 | MET            | 1.4392731 | up | met proto-oncogene (hepatocyte growth factor recept     |
| 7926223 | CAMK1D         | 1.4389403 | up | calcium/calmodulin-dependent protein kinase ID          |
| 8040927 | NRBP1          | 1.4388721 | up | nuclear receptor binding protein 1                      |
| 7966150 | SSH1           | 1.4386716 | up | slingshot homolog 1 (Drosophila)                        |
| 8138842 | NOD1           | 1.4379296 | up | nucleotide-binding oligomerization domain containing    |
| 8009417 | KPNA2 LOC72886 | 1.4374695 | up | karyopherin alpha 2 (RAG cohort 1, importin alpha 1)    |
| 8126402 | TRERF1         | 1.4372561 | up | transcriptional regulating factor 1                     |
| 8018922 | PSCD1          | 1.4361416 | up | pleckstrin homology, Sec7 and coiled-coil domains 1(c)  |
| 7950473 | ARRB1          | 1.4360169 | up | arrestin, beta 1                                        |

Supplemental Table 1c  
eMSC vs. eSF

|         |             |           |    |                                                           |
|---------|-------------|-----------|----|-----------------------------------------------------------|
| 8137244 | GIMAP4      | 1.4342654 | up | GTPase, IMAP family member 4                              |
| 7962183 | AK3L1 AK3L2 | 1.4339057 | up | adenylate kinase 3-like 1   adenylate kinase 3-like 2     |
| 7913237 | CAMK2N1     | 1.4327126 | up | calcium/calmodulin-dependent protein kinase II inhibitor  |
| 8075462 | SELM        | 1.4323086 | up | selenoprotein M                                           |
| 8001067 | HERC2P4     | 1.4286021 | up | hect domain and RLD 2 pseudogene 4                        |
| 8114536 | TMEM173     | 1.427032  | up | transmembrane protein 173                                 |
| 7929511 | ENTPD1      | 1.4252521 | up | ectonucleoside triphosphate diphosphohydrolase 1          |
| 8016463 | HOXB6       | 1.4250227 | up | homeobox B6                                               |
| 8019988 | PTPRM       | 1.4248924 | up | protein tyrosine phosphatase, receptor type, M            |
| 8094441 | SLC34A2     | 1.4239854 | up | solute carrier family 34 (sodium phosphate), member 2     |
| 7990643 | LINGO1      | 1.4224085 | up | leucine rich repeat and Ig domain containing 1            |
| 7986092 | FURIN       | 1.422328  | up | furin (paired basic amino acid cleaving enzyme)           |
| 7916747 | JAK1        | 1.4222753 | up | Janus kinase 1 (a protein tyrosine kinase)                |
| 8155192 | C9orf19     | 1.4219099 | up | chromosome 9 open reading frame 19                        |
| 8004691 | TMEM88      | 1.4218124 | up | transmembrane protein 88                                  |
| 8002152 | SLC12A4     | 1.4210613 | up | solute carrier family 12 (potassium/chloride transporter) |
| 8167125 | USP11       | 1.4204739 | up | ubiquitin specific peptidase 11                           |
| 8083901 | FNDC3B      | 1.4197326 | up | fibronectin type III domain containing 3B                 |
| 7956261 | RBMS2       | 1.4195477 | up | RNA binding motif, single stranded interacting protein    |
| 7947425 | CD59        | 1.4193343 | up |                                                           |
| 7909285 | PFKFB2      | 1.4184893 | up | 6-phosphofructo-2-kinase/fructose-2,6-bisphosphatase      |
| 7950671 | GAB2        | 1.4174122 | up | GRB2-associated binding protein 2                         |
| 8178977 | TAPBP       | 1.4172984 | up | TAP binding protein (tapasin)                             |
| 8164269 | ENG         | 1.4171392 | up | endoglin (Osler-Rendu-Weber syndrome 1)                   |
| 8064766 | RNF24       | 1.417042  | up | ring finger protein 24                                    |
| 8033233 | TUBB4       | 1.4168392 | up | tubulin, beta 4                                           |
| 8134869 | PCOLCE      | 1.4168279 | up | procollagen C-endopeptidase enhancer                      |
| 7899153 | SH3BGRL3    | 1.4162018 | up | SH3 domain binding glutamic acid-rich protein like 3      |
| 7938834 | NAV2        | 1.4161546 | up | neuron navigator 2                                        |
| 8142981 | PODXL       | 1.4160477 | up | podocalyxin-like                                          |
| 8140955 | CDK6        | 1.4138837 | up | cyclin-dependent kinase 6                                 |
| 7977592 | GAFA1       | 1.4106767 | up |                                                           |
| 7965573 | NTN4        | 1.410658  | up | netrin 4                                                  |

Supplemental Table 1c  
eMSC vs. eSF

|         |                   |           |    |                                                         |
|---------|-------------------|-----------|----|---------------------------------------------------------|
| 8077499 | LOH3CR2A          | 1.4097248 | up | loss of heterozygosity, 3, chromosomal region 2, gene . |
| 8034130 | KANK2             | 1.408094  | up | KN motif and ankyrin repeat domains 2                   |
| 8001531 | MT1G              | 1.4077866 | up | metallothionein 1G                                      |
| 8101839 | EIF4E             | 1.407324  | up | eukaryotic translation initiation factor 4E             |
| 8067233 | PMEPA1            | 1.4067531 | up | prostate transmembrane protein, androgen induced 1      |
| 8096899 | C4orf32           | 1.405974  | up | chromosome 4 open reading frame 32                      |
| 8025601 | ICAM1             | 1.4058912 | up | intercellular adhesion molecule 1 (CD54), human rhino   |
| 7937961 | MMP26             | 1.405243  | up | matrix metalloproteinase 26                             |
| 8138381 | AGR2              | 1.4051378 | up | anterior gradient homolog 2 (Xenopus laevis)            |
| 8021129 | C18orf23   RNF165 | 1.4035227 | up | chromosome 18 open reading frame 23   ring finger pr    |
| 8098103 | FNIP2             | 1.4035027 | up | folliculin interacting protein 2                        |
| 7959102 | HSPB8             | 1.4025738 | up | heat shock 22kDa protein 8                              |
| 8083941 | ECT2              | 1.4022502 | up | epithelial cell transforming sequence 2 oncogene        |
| 7905116 | PLEKHO1           | 1.4018345 | up | pleckstrin homology domain containing, family O mem     |
| 8070819 | PTTG1IP           | 1.4008188 | up | pituitary tumor-transforming 1 interacting protein      |
| 8153684 | DGAT1   LOC72776  | 1.3980547 | up | diacylglycerol O-acyltransferase homolog 1 (mouse)   s  |
| 8106098 | MAP1B             | 1.3964614 | up | microtubule-associated protein 1B                       |
| 8105267 | ITGA2             | 1.3962464 | up | integrin, alpha 2 (CD49B, alpha 2 subunit of VLA-2 rece |
| 7997427 | CMIP              | 1.396152  | up | c-Maf-inducing protein                                  |
| 7962884 | RND1              | 1.3943894 | up | Rho family GTPase 1                                     |
| 8022145 | L3MBTL4           | 1.3933381 | up | l(3)mbt-like 4 (Drosophila)                             |
| 8039692 | LOC730051         | 1.3920515 | up | similar to hCG2044798                                   |
| 7995793 | MT1L              | 1.3904605 | up | metallothionein 1L (gene/pseudogene)                    |
| 7961386 | GPRC5D            | 1.3894863 | up | G protein-coupled receptor, family C, group 5, membe    |
| 8153939 | DGAT1   LOC72776  | 1.388562  | up | diacylglycerol O-acyltransferase homolog 1 (mouse)   s  |
| 8088680 | C3orf64           | 1.3882059 | up | chromosome 3 open reading frame 64                      |
| 8063187 | EYA2              | 1.3879763 | up | eyes absent homolog 2 (Drosophila)                      |
| 8066939 | B4GALT5           | 1.3877908 | up | UDP-Gal:betaGlcNAc beta 1,4- galactosyltransferase, p   |
| 7957072 | RAB3IP            | 1.3873192 | up | RAB3A interacting protein (rabin3)                      |
| 7939365 | FJX1              | 1.3871212 | up | four jointed box 1 (Drosophila)                         |
| 8118111 | HCP5              | 1.3852494 | up | HLA complex P5                                          |
| 8099797 | RELL1             | 1.382141  | up | RELT-like 1                                             |
| 7961230 | CSDA              | 1.3820273 | up | cold shock domain protein A                             |

Supplemental Table 1c  
eMSC vs. eSF

|         |                 |           |    |                                                           |
|---------|-----------------|-----------|----|-----------------------------------------------------------|
| 7965652 | PCTK2           | 1.3819454 | up | PCTAIRE protein kinase 2                                  |
| 8066716 | ELMO2           | 1.3816552 | up | engulfment and cell motility 2                            |
| 8079950 | GNAI2           | 1.3808022 | up | guanine nucleotide binding protein (G protein), alpha i   |
| 8007154 | FKBP10          | 1.380549  | up | FK506 binding protein 10, 65 kDa                          |
| 8069178 | ADARB1          | 1.3803008 | up | adenosine deaminase, RNA-specific, B1 (RED1 homolog)      |
| 8102950 | INPP4B          | 1.3797288 | up | inositol polyphosphate-4-phosphatase, type II, 105kDa     |
| 8054517 | FLJ38359 LOC440 | 1.3782442 | up | hypothetical protein FLJ38359   hypothetical protein L    |
| 8052798 | AAK1            | 1.3778337 | up | AP2 associated kinase 1                                   |
| 8079305 | CLEC3B          | 1.3776344 | up | C-type lectin domain family 3, member B                   |
| 7950743 | RAB30           | 1.3773522 | up |                                                           |
| 8006433 | CCL2            | 1.376677  | up | chemokine (C-C motif) ligand 2                            |
| 8141094 | PDK4            | 1.3749638 | up | pyruvate dehydrogenase kinase, isozyme 4                  |
| 8116051 | DBN1            | 1.3736382 | up | drebrin 1                                                 |
| 7965357 | GALNT4          | 1.37352   | up | UDP-N-acetyl-alpha-D-galactosamine:polypeptide N-ac       |
| 7934690 | C10orf56        | 1.3720673 | up | chromosome 10 open reading frame 56                       |
| 7983478 | C15orf48        | 1.3715769 | up | chromosome 15 open reading frame 48                       |
| 8028311 | SPINT2 LOC10013 | 1.3710306 | up | serine peptidase inhibitor, Kunitz type, 2   hypothetical |
| 8109528 | CYFIP2          | 1.3692739 | up | cytoplasmic FMR1 interacting protein 2                    |
| 7984364 | SMAD3           | 1.368978  | up | SMAD family member 3                                      |
| 8046922 | COL3A1          | 1.3677368 | up | collagen, type III, alpha 1 (Ehlers-Danlos syndrome type  |
| 8057898 | HECW2           | 1.367144  | up | HECT, C2 and WW domain containing E3 ubiquitin prot       |
| 7913450 | HSPG2           | 1.366813  | up | heparan sulfate proteoglycan 2                            |
| 8066905 | ZNFX1           | 1.3666472 | up | zinc finger, NFX1-type containing 1                       |
| 7901175 | TSPAN1          | 1.3662252 | up | tetraspanin 1                                             |
| 8027778 | FXVD5           | 1.3661801 | up | FXVD domain containing ion transport regulator 5          |
| 8083075 | ACPL2           | 1.3659626 | up | acid phosphatase-like 2                                   |
| 7923662 | PIK3C2B         | 1.3655438 | up | phosphoinositide-3-kinase, class 2, beta polypeptide      |
| 7913558 | LUZP1           | 1.3651103 | up | leucine zipper protein 1                                  |
| 7980828 | CCDC88C         | 1.3635421 | up | coiled-coil domain containing 88C                         |
| 8018966 | TIMP2           | 1.3633741 | up | TIMP metalloproteinase inhibitor 2                        |
| 8170390 | IDS LOC727913   | 1.362903  | up | iduronate 2-sulfatase (Hunter syndrome)   similar to ic   |
| 8104506 | TRIO LOC100131  | 1.3627262 | up | triple functional domain (PTPRF interacting)   hypothe    |
| 8020551 | LAMA3           | 1.3621317 | up | laminin, alpha 3                                          |

Supplemental Table 1c  
eMSC vs. eSF

|         |             |           |    |                                                                        |
|---------|-------------|-----------|----|------------------------------------------------------------------------|
| 7919305 | PRKAB2      | 1.3611366 | up | protein kinase, AMP-activated, beta 2 non-catalytic subunit            |
| 7938154 | ILK ILK-2   | 1.3610952 | up | integrin-linked kinase   integrin-linked kinase-2                      |
| 7951662 | CRYAB       | 1.3601574 | up | crystallin, alpha B                                                    |
| 8154692 | TEK         | 1.3598192 | up |                                                                        |
| 8123651 | TUBB2B      | 1.3591425 | up | tubulin, beta 2B                                                       |
| 8097867 | KIAA0922    | 1.3590358 | up |                                                                        |
| 7917728 | FAM69A RPL5 | 1.3586566 | up | family with sequence similarity 69, member A   ribosomal protein L5    |
| 7943562 | ELMOD1      | 1.3579404 | up | ELMO/CED-12 domain containing 1                                        |
| 8008969 | TBX2        | 1.3572537 | up | T-box 2                                                                |
| 8095110 | KIT         | 1.3547624 | up | v-kit Hardy-Zuckerman 4 feline sarcoma viral oncogene homolog          |
| 8001133 | SHCBP1      | 1.3534385 | up | SHC SH2-domain binding protein 1                                       |
| 8117120 | ID4         | 1.3533679 | up | inhibitor of DNA binding 4, dominant negative helix-loop-helix protein |
| 8121949 | LAMA2       | 1.3528479 | up | laminin, alpha 2 (merosin, congenital muscular dystrophy associated)   |
| 8058477 | KLF7        | 1.3523154 | up | Kruppel-like factor 7 (ubiquitous)                                     |
| 7979524 | TMEM30B     | 1.351987  | up | transmembrane protein 30B                                              |
| 8094911 | ATP10D      | 1.3517752 | up | ATPase, class V, type 10D                                              |
| 8006779 | ARHGAP23    | 1.3501939 | up | Rho GTPase activating protein 23                                       |
| 8122756 | PLEKHG1     | 1.3500507 | up | pleckstrin homology domain containing, family G (with SH3 domain)      |
| 8035304 | BST2        | 1.3498807 | up | bone marrow stromal cell antigen 2                                     |
| 7977615 | RNASE1      | 1.3496871 | up | ribonuclease, RNase A family, 1 (pancreatic)                           |
| 8017597 | hCG_1793136 | 1.3494617 | up | similar to ribosomal protein L31                                       |
| 8082673 | ACPP        | 1.3492163 | up | acid phosphatase, prostate                                             |
| 7986214 | SLCO3A1     | 1.3484929 | up | solute carrier organic anion transporter family, member 3A1            |
| 8000811 | MAPK3       | 1.3482376 | up | mitogen-activated protein kinase 3                                     |
| 8043993 | UNQ9419     | 1.3470227 | up | AHPA9419                                                               |
| 7950838 | PICALM      | 1.3455602 | up | phosphatidylinositol binding clathrin assembly protein                 |
| 8151512 | PAG1        | 1.3446492 | up | phosphoprotein associated with glycosphingolipid microdomains          |
| 8163908 | GGTA1       | 1.3431667 | up | glycoprotein, alpha-galactosyltransferase 1                            |
| 8078252 | UBE2E2      | 1.3431358 | up | ubiquitin-conjugating enzyme E2E 2 (UBC4/5 homolog)                    |
| 8012126 | CLDN7       | 1.3424686 | up | claudin 7                                                              |
| 7962000 | PTH1L       | 1.3409461 | up | parathyroid hormone-like hormone                                       |
| 7995755 | OGFOD1      | 1.3407015 | up | 2-oxoglutarate and iron-dependent oxygenase domain containing          |
| 8111677 | LIFR        | 1.340693  | up | leukemia inhibitory factor receptor alpha                              |

Supplemental Table 1c  
eMSC vs. eSF

|         |                 |           |    |                                                          |
|---------|-----------------|-----------|----|----------------------------------------------------------|
| 8077441 | BHLHB2          | 1.3400959 | up | basic helix-loop-helix domain containing, class B, 2     |
| 7943398 | YAP1            | 1.3393099 | up | Yes-associated protein 1, 65kDa                          |
| 8135585 | LOC100128868    | 1.3385271 | up | testin-related protein TRG                               |
| 7969330 | PCDH17          | 1.3382148 | up | protocadherin 17                                         |
| 8129880 | PERP            | 1.3379124 | up |                                                          |
| 7942998 | PSMAL FOLH1     | 1.3377165 | up | growth-inhibiting protein 26   folate hydrolase (prosta  |
| 8041447 | CRIM1           | 1.3360317 | up | cysteine rich transmembrane BMP regulator 1 (chordir     |
| 8023646 | BCL2            | 1.3347306 | up | B-cell CLL/lymphoma 2                                    |
| 8097841 | TRIM2           | 1.3347028 | up | tripartite motif-containing 2                            |
| 7929026 | LOC100132116    | 1.3339747 | up |                                                          |
| 8015412 | JUP             | 1.3324403 | up | junction plakoglobin                                     |
| 7951485 | SLC35F2         | 1.332325  | up | solute carrier family 35, member F2                      |
| 8046906 | GULP1           | 1.3314403 | up | GULP, engulfment adaptor PTB domain containing 1         |
| 8088979 | VGLL3           | 1.3313935 | up | vestigial like 3 (Drosophila)                            |
| 7938528 | PARVA           | 1.3313154 | up | parvin, alpha                                            |
| 8178419 | FLOT1           | 1.331192  | up | flotillin 1                                              |
| 8031825 | ZNF587          | 1.3307242 | up | zinc finger protein 587                                  |
| 7940630 | SCGB1D2         | 1.3295804 | up | secretoglobin, family 1D, member 2                       |
| 7909862 | C1orf115        | 1.3293787 | up | chromosome 1 open reading frame 115                      |
| 8009685 | SLC9A3R1        | 1.3281394 | up | solute carrier family 9 (sodium/hydrogen exchanger), r   |
| 8089851 | HGD LOC1001325  | 1.3273773 | up | homogentisate 1,2-dioxygenase (homogentisate oxida:      |
| 8095907 | FRAS1           | 1.3273131 | up | Fraser syndrome 1                                        |
| 8177983 | TNF             | 1.3258452 | up |                                                          |
| 8020878 | MAPRE2          | 1.3258104 | up | microtubule-associated protein, RP/EB family, membe      |
| 8118142 | TNF             | 1.3257304 | up |                                                          |
| 8179263 | TNF             | 1.3257256 | up |                                                          |
| 7981068 | SERPINA1        | 1.3247197 | up | serpin peptidase inhibitor, clade A (alpha-1 antiprotein |
| 8089544 | CCDC80          | 1.3240476 | up | coiled-coil domain containing 80                         |
| 8047248 | PLCL1           | 1.3231372 | up | phospholipase C-like 1                                   |
| 7995787 | MT1M            | 1.3218232 | up | metallothionein 1M                                       |
| 8093278 | HGD LOC1001325  | 1.3217764 | up | homogentisate 1,2-dioxygenase (homogentisate oxida:      |
| 7899615 | SERINC2 KIAA074 | 1.3215497 | up | serine incorporator 2   KIAA0746 protein                 |
| 8124828 | FLOT1           | 1.3208047 | up | flotillin 1                                              |

Supplemental Table 1c  
eMSC vs. eSF

|         |             |           |    |                                                          |
|---------|-------------|-----------|----|----------------------------------------------------------|
| 8163149 | PTPN3       | 1.3207445 | up | protein tyrosine phosphatase, non-receptor type 3        |
| 8081645 | C3orf52     | 1.3202229 | up | chromosome 3 open reading frame 52                       |
| 8179688 | FLOT1       | 1.3190174 | up | flotillin 1                                              |
| 8027701 | GRAMD1A     | 1.3181629 | up | GRAM domain containing 1A                                |
| 7919095 | NOTCH2      | 1.3177153 | up | Notch homolog 2 (Drosophila)                             |
| 8117243 | LRRRC16A    | 1.3169057 | up | leucine rich repeat containing 16A                       |
| 8133360 | CLDN4       | 1.3160921 | up | claudin 4                                                |
| 8090193 | HEG1        | 1.3160244 | up | HEG homolog 1 (zebrafish)                                |
| 7976443 | IFI27       | 1.3158894 | up | interferon, alpha-inducible protein 27                   |
| 7962250 | CPNE8       | 1.3158729 | up | copine VIII                                              |
| 7952490 | FEZ1        | 1.3154123 | up | fasciculation and elongation protein zeta 1 (zygin I)    |
| 8133233 | AUTS2       | 1.3143761 | up | autism susceptibility candidate 2                        |
| 8121588 | DSE         | 1.3136058 | up | dermatan sulfate epimerase                               |
| 8049544 | LRRFIP1     | 1.3111004 | up | leucine rich repeat (in FLII) interacting protein 1      |
| 7995813 | MT1DP       | 1.3089769 | up | metallothionein 1D (pseudogene)                          |
| 8061035 | MACROD2     | 1.3086374 | up | MACRO domain containing 2                                |
| 7982757 | CASC5       | 1.308026  | up | cancer susceptibility candidate 5                        |
| 7995797 | MT1E        | 1.3074305 | up | metallothionein 1E                                       |
| 8014974 | TOP2A       | 1.3074241 | up | topoisomerase (DNA) II alpha 170kDa                      |
| 8115783 | STK10       | 1.3069142 | up | serine/threonine kinase 10                               |
| 7949503 | EFEMP2      | 1.3065972 | up | EGF-containing fibulin-like extracellular matrix protein |
| 7955613 | KRT7        | 1.3059716 | up | keratin 7                                                |
| 8089478 | GCET2       | 1.3053706 | up | germinal center expressed transcript 2                   |
| 7948058 | FOLH1 PSMAL | 1.3038528 | up | folate hydrolase (prostate-specific membrane antigen)    |
| 8132118 | AQP1        | 1.3036377 | up | aquaporin 1 (Colton blood group)                         |
| 7986527 | C15orf51    | 1.303629  | up | chromosome 15 open reading frame 51                      |
| 8021727 | CNDP2       | 1.3035139 | up | CNDP dipeptidase 2 (metallopeptidase M20 family)         |
| 8057887 | STK17B      | 1.3027499 | up | serine/threonine kinase 17b                              |
| 7986509 | LOC441734   | 1.3023814 | up | similar to hypothetical protein DKFZp434I1020            |
| 7983527 | SEMA6D      | 1.3018274 | up | sema domain, transmembrane domain (TM), and cyto         |
| 8003171 | COTL1       | 1.300161  | up | coactosin-like 1 (Dictyostelium)                         |
| 7988876 | MYO5C       | 1.3001438 | up | myosin VC                                                |
| 7917850 | ARHGAP29    | 1.2986673 | up | Rho GTPase activating protein 29                         |



Supplemental Table 1c  
eMSC vs. eSF

|         |               |           |    |                                                         |
|---------|---------------|-----------|----|---------------------------------------------------------|
| 7986359 | IGF1R         | 1.2986006 | up | insulin-like growth factor 1 receptor                   |
| 8141016 | TFPI2         | 1.2984293 | up | tissue factor pathway inhibitor 2                       |
| 8023855 | CYB5A         | 1.2982326 | up | cytochrome b5 type A (microsomal)                       |
| 8131803 | IL6           | 1.2981673 | up | interleukin 6 (interferon, beta 2)                      |
| 7980891 | TC2N          | 1.2980264 | up | tandem C2 domains, nuclear                              |
| 8149749 | TNFRSF10D     | 1.2977791 | up | tumor necrosis factor receptor superfamily, member 1    |
| 8005661 | SPECC1        | 1.296576  | up | sperm antigen with calponin homology and coiled-coil    |
| 7940323 | MS4A8B        | 1.296104  | up | membrane-spanning 4-domains, subfamily A, member        |
| 7999079 | ADCY9         | 1.2953582 | up | adenylate cyclase 9                                     |
| 8029465 | BCL3          | 1.2948827 | up | B-cell CLL/lymphoma 3                                   |
| 8138202 | ICA1          | 1.293993  | up | islet cell autoantigen 1, 69kDa                         |
| 7991453 | LOC400451     | 1.2933757 | up | hypothetical gene supported by AK075564; BC060873       |
| 8114814 | NR3C1         | 1.2933373 | up | nuclear receptor subfamily 3, group C, member 1 (gluc   |
| 8147461 | SDC2          | 1.293287  | up | syndecan 2                                              |
| 8131179 | TTYH3         | 1.29302   | up | tweety homolog 3 (Drosophila)                           |
| 7990657 | TBC1D2B       | 1.2928042 | up | TBC1 domain family, member 2B                           |
| 8171313 | ARHGAP6       | 1.2917818 | up | Rho GTPase activating protein 6                         |
| 8010243 | SYNGR2        | 1.2908128 | up | synaptogyrin 2                                          |
| 8140140 | CLDN3         | 1.2907217 | up | claudin 3                                               |
| 7904158 | OLFML3        | 1.2886028 | up | olfactomedin-like 3                                     |
| 7907222 | PRRX1         | 1.2872795 | up | paired related homeobox 1                               |
| 8126428 | TRERF1        | 1.2866001 | up | transcriptional regulating factor 1                     |
| 7915444 | LEPRE1        | 1.28643   | up | leucine proline-enriched proteoglycan (leprecan) 1      |
| 7956573 | SLC26A10 GEFT | 1.2839193 | up | solute carrier family 26, member 10   RhoA/RAC/CDC4     |
| 7948167 | AGTRL1        | 1.2827289 | up | angiotensin II receptor-like 1                          |
| 7902592 | ARID3B        | 1.2824693 | up | AT rich interactive domain 3B (BRIGHT-like)             |
| 8152764 | MTSS1         | 1.2822474 | up | metastasis suppressor 1                                 |
| 7975268 | ARG2          | 1.2814562 | up | arginase, type II                                       |
| 7902687 | CYR61         | 1.2805647 | up | cysteine-rich, angiogenic inducer, 61                   |
| 8128099 | GABRR2        | 1.2794847 | up | gamma-aminobutyric acid (GABA) receptor, rho 2          |
| 8064808 | SLC23A2       | 1.2793146 | up | solute carrier family 23 (nucleobase transporters), mer |
| 8098870 | SPON2         | 1.2785906 | up | spondin 2, extracellular matrix protein                 |
| 8010271 | PGS1          | 1.2781708 | up | phosphatidylglycerophosphate synthase 1                 |

Supplemental Table 1c  
eMSC vs. eSF

|         |                |           |    |                                                         |
|---------|----------------|-----------|----|---------------------------------------------------------|
| 8033674 | MUC16          | 1.2781557 | up | mucin 16, cell surface associated                       |
| 8020110 | RAB31          | 1.2769474 | up |                                                         |
| 7951807 | CADM1 LOC1001  | 1.2747892 | up | cell adhesion molecule 1   hypothetical LOC100132764    |
| 7923991 | PLXNA2         | 1.2743891 | up | plexin A2                                               |
| 8099172 | CRMP1          | 1.2739264 | up | collapsin response mediator protein 1                   |
| 8146462 | SOX17          | 1.2727743 | up | SRY (sex determining region Y)-box 17                   |
| 7996081 | GPR56          | 1.2726943 | up | G protein-coupled receptor 56                           |
| 7954631 | MLSTD1         | 1.2726868 | up | male sterility domain containing 1                      |
| 8116780 | DSP            | 1.271582  | up | desmoplakin                                             |
| 8155802 | GDA            | 1.2690779 | up | guanine deaminase                                       |
| 7929282 | HHEX           | 1.268342  | up | hematopoietically expressed homeobox                    |
| 7904000 | DDX20          | 1.2678148 | up | DEAD (Asp-Glu-Ala-Asp) box polypeptide 20               |
| 8147351 | RBM35A         | 1.2660196 | up | RNA binding motif protein 35A                           |
| 7937330 | IFITM2         | 1.2650641 | up | interferon induced transmembrane protein 2 (1-8D)       |
| 8075673 | RBM9           | 1.2643542 | up | RNA binding motif protein 9                             |
| 8067055 | ATP9A          | 1.26434   | up | ATPase, class II, type 9A                               |
| 8018082 | SLC39A11       | 1.264265  | up | solute carrier family 39 (metal ion transporter), membe |
| 8156897 | C9orf30 TMEFF1 | 1.2641381 | up | chromosome 9 open reading frame 30   transmembrai       |
| 7950248 | FCHSD2         | 1.264007  | up | FCH and double SH3 domains 2                            |
| 8169240 | PRPS1          | 1.2636995 | up | phosphoribosyl pyrophosphate synthetase 1               |
| 7987772 | EHD4           | 1.2636806 | up | EH-domain containing 4                                  |
| 8076355 | PMM1           | 1.2612801 | up | phosphomannomutase 1                                    |
| 7932243 | C10orf38       | 1.2611487 | up | chromosome 10 open reading frame 38                     |
| 7980742 | LOC283588      | 1.2591076 | up |                                                         |
| 7945245 | HNT            | 1.2587376 | up | neurotrimin                                             |
| 7961798 | SOX5           | 1.2585427 | up | SRY (sex determining region Y)-box 5                    |
| 8096875 | ENPEP          | 1.2580826 | up | glutamyl aminopeptidase (aminopeptidase A)              |
| 8036284 | COX7A1         | 1.2540787 | up | cytochrome c oxidase subunit VIIa polypeptide 1 (muscl  |
| 8111387 | ADAMTS12       | 1.2535032 | up | ADAM metalloproteinase with thrombospondin type 1 i     |
| 7923875 | C1orf186       | 1.2527746 | up | chromosome 1 open reading frame 186                     |
| 8139656 | GRB10          | 1.2523178 | up | growth factor receptor-bound protein 10                 |
| 8170364 | AFF2           | 1.2522153 | up | AF4/FMR2 family, member 2                               |
| 7914603 | RNF19B         | 1.2520148 | up | ring finger protein 19B                                 |

Supplemental Table 1c  
eMSC vs. eSF

|         |           |           |    |                                                         |
|---------|-----------|-----------|----|---------------------------------------------------------|
| 7918857 | TSPAN2    | 1.2510731 | up | tetraspanin 2                                           |
| 7924029 | LAMB3     | 1.2498682 | up | laminin, beta 3                                         |
| 8149733 | TNFRSF10B | 1.2488073 | up | tumor necrosis factor receptor superfamily, member 1    |
| 8027604 | KIAA0355  | 1.247849  | up |                                                         |
| 7938225 | OLFML1    | 1.2469879 | up | olfactomedin-like 1                                     |
| 8041853 | TACSTD1   | 1.2465585 | up | tumor-associated calcium signal transducer 1            |
| 7988414 | GATM      | 1.2464316 | up | glycine amidinotransferase (L-arginine:glycine amidino  |
| 8090091 | PTPLB     | 1.2461532 | up | protein tyrosine phosphatase-like (proline instead of c |
| 7991581 | CHSY1     | 1.2459005 | up | chondroitin sulfate synthase 1                          |
| 7980044 | PNMA1     | 1.2458925 | up | paraneoplastic antigen MA1                              |
| 7939559 | TSPAN18   | 1.2458894 | up | tetraspanin 18                                          |
| 7932023 | USP6NL    | 1.2454053 | up | USP6 N-terminal like                                    |
| 7982829 | SPINT1    | 1.2448052 | up | serine peptidase inhibitor, Kunitz type 1               |
| 7940028 | SERPING1  | 1.2446387 | up | serpin peptidase inhibitor, clade G (C1 inhibitor), mem |
| 8099760 | CENTD1    | 1.2423166 | up | centaurin, delta 1                                      |
| 8175052 | AIFM1     | 1.2413694 | up | apoptosis-inducing factor, mitochondrion-associated, 1  |
| 8158317 | SPTAN1    | 1.2397655 | up | spectrin, alpha, non-erythrocytic 1 (alpha-fodrin)      |
| 8146579 | CHD7      | 1.2390047 | up | chromodomain helicase DNA binding protein 7             |
| 7964665 | DPY19L2   | 1.2388545 | up | dpy-19-like 2 (C. elegans)                              |
| 8058627 | ERBB4     | 1.2387903 | up | v-erb-a erythroblastic leukemia viral oncogene homolo   |
| 8030007 | EMP3      | 1.2385622 | up | epithelial membrane protein 3                           |
| 8030133 | NUCB1     | 1.2380683 | up | nucleobindin 1                                          |
| 7945262 | JAM3      | 1.2378615 | up | junctional adhesion molecule 3                          |
| 8072678 | HMOX1     | 1.2355632 | up | heme oxygenase (decycling) 1                            |
| 8054308 | TBC1D8    | 1.2346803 | up | TBC1 domain family, member 8 (with GRAM domain)         |
| 8005132 | MEIS3P1   | 1.2334608 | up | Meis homeobox 3 pseudogene 1                            |
| 8075106 | TPST2     | 1.233325  | up | tyrosylprotein sulfotransferase 2                       |
| 7968703 | NHLRC3    | 1.2328064 | up | NHL repeat containing 3                                 |
| 8054511 | LOC205251 | 1.2324553 | up |                                                         |
| 7909841 | MARK1     | 1.2310106 | up | MAP/microtubule affinity-regulating kinase 1            |
| 8072015 | ADRBK2    | 1.2302928 | up | adrenergic, beta, receptor kinase 2                     |
| 8131583 | BZW2      | 1.2281134 | up | basic leucine zipper and W2 domains 2                   |
| 7984217 | PLEKHO2   | 1.2277347 | up | pleckstrin homology domain containing, family O mem     |

## Supplemental Table 1c

eMSC vs. eSF

|         |                 |           |    |                                                           |
|---------|-----------------|-----------|----|-----------------------------------------------------------|
| 8179719 | POU5F1 POU5F1I  | 1.227513  | up | POU class 5 homeobox 1   POU class 5 homeobox 1 ps        |
| 8124889 | POU5F1 POU5F1I  | 1.2268524 | up | POU class 5 homeobox 1   POU class 5 homeobox 1 ps        |
| 8013753 | RAB34           | 1.226759  | up |                                                           |
| 7974425 | SAMD4A          | 1.2264146 | up | sterile alpha motif domain containing 4A                  |
| 7996571 | FAM65A          | 1.2248394 | up | family with sequence similarity 65, member A              |
| 7986569 | LOC283755 HERC  | 1.2245008 | up | hypothetical protein LOC283755   hect domain and RL       |
| 8170007 | LOC644538       | 1.2244638 | up |                                                           |
| 7960984 | PZP             | 1.2234662 | up | pregnancy-zone protein                                    |
| 8066431 | ADA             | 1.2232833 | up | adenosine deaminase                                       |
| 7903742 | GSTM4 GSTM2     | 1.2224858 | up | glutathione S-transferase M4   glutathione S-transferase  |
| 8121277 | AIM1            | 1.2209611 | up | absent in melanoma 1                                      |
| 7965226 | RASSF9          | 1.220733  | up | Ras association (RalGDS/AF-6) domain family (N-terminal)  |
| 7954589 | REP15           | 1.2168349 | up | Rab15 effector protein                                    |
| 7918504 | OVGP1           | 1.2160882 | up | oviductal glycoprotein 1, 120kDa (mucin 9, oviductin)     |
| 8104378 | POLS            | 1.2147251 | up | polymerase (DNA directed) sigma                           |
| 8104035 | SORBS2          | 1.2142538 | up | sorbin and SH3 domain containing 2                        |
| 8117106 | RNF144B         | 1.2140487 | up | ring finger 144B                                          |
| 7957140 | LGR5            | 1.2140473 | up | leucine-rich repeat-containing G protein-coupled receptor |
| 8002778 | MLKL            | 1.2133596 | up | mixed lineage kinase domain-like                          |
| 8083146 | PLS1            | 1.2131869 | up | plastin 1 (I isoform)                                     |
| 8178802 | HLA-DRB3 HLA-DI | 1.2129067 | up |                                                           |
| 7920642 | MUC1            | 1.2125695 | up | mucin 1, cell surface associated                          |
| 8095868 | UNQ3028         | 1.2122586 | up | TSSP3028                                                  |
| 8123739 | NRN1            | 1.20975   | up | neuritin 1                                                |
| 8123678 | C6orf145        | 1.20888   | up | chromosome 6 open reading frame 145                       |
| 8161701 | TMEM2           | 1.2079238 | up | transmembrane protein 2                                   |
| 8178470 | POU5F1 POU5F1I  | 1.2076921 | up | POU class 5 homeobox 1   POU class 5 homeobox 1 ps        |
| 8124196 | DCDC2           | 1.207445  | up | doublecortin domain containing 2                          |
| 7960362 | UNQ3104         | 1.2070514 | up | ACA3104                                                   |
| 7972157 | EDNRB           | 1.206944  | up | endothelin receptor type B                                |
| 8144481 | DEFB4           | 1.2068644 | up | defensin, beta 4                                          |
| 8059350 | AP1S3           | 1.2066566 | up | adaptor-related protein complex 1, sigma 3 subunit        |
| 7905329 | MLLT11          | 1.2065758 | up | myeloid/lymphoid or mixed-lineage leukemia (trithorax)    |

Supplemental Table 1c  
eMSC vs. eSF

|         |         |           |    |                                                          |
|---------|---------|-----------|----|----------------------------------------------------------|
| 8149169 | DEFB4   | 1.2058175 | up | defensin, beta 4                                         |
| 8142468 | TPM3    | 1.2055255 | up | tropomyosin 3                                            |
| 7963786 | ITGA5   | 1.2052929 | up | integrin, alpha 5 (fibronectin receptor, alpha polypepti |
| 7936041 | ARL3    | 1.2052435 | up | ADP-ribosylation factor-like 3                           |
| 7923929 | PIGR    | 1.204897  | up | polymeric immunoglobulin receptor                        |
| 8109001 | SPINK5  | 1.204883  | up | serine peptidase inhibitor, Kazal type 5                 |
| 8140686 | SEMA3D  | 1.2046164 | up | sema domain, immunoglobulin domain (Ig), short basic     |
| 7899534 | EPB41   | 1.2045662 | up | erythrocyte membrane protein band 4.1 (elliptocytosis    |
| 7947147 | SVIP    | 1.2043555 | up | small VCP/p97-interacting protein                        |
| 8045289 | RHOQ    | 1.2039759 | up | ras homolog gene family, member Q                        |
| 7963054 | TUBA1A  | 1.2030563 | up | tubulin, alpha 1a                                        |
| 8143065 | C7orf49 | 1.2030191 | up | chromosome 7 open reading frame 49                       |
| 7938880 | HTATIP2 | 1.20265   | up | HIV-1 Tat interactive protein 2, 30kDa                   |
| 8178653 | SLC44A4 | 1.2021742 | up | solute carrier family 44, member 4                       |
| 8097692 | EDNRA   | 1.2015362 | up | endothelin receptor type A                               |
| 8121861 | NCOA7   | 1.2013844 | up | nuclear receptor coactivator 7                           |
| 8013788 | FLOT2   | 1.2013235 | up | flotillin 2                                              |
| 8092552 | IGF2BP2 | 1.2003328 | up | insulin-like growth factor 2 mRNA binding protein 2      |
| 8068105 | BACH1   | 1.2000861 | up | BTB and CNC homology 1, basic leucine zipper transcrip   |
| 8125149 | SLC44A4 | 1.1997834 | up | solute carrier family 44, member 4                       |
| 8116835 | GCNT2   | 1.1996583 | up | glucosaminyl (N-acetyl) transferase 2, l-branching enzy  |
| 8091009 | PIK3CB  | 1.199458  | up | phosphoinositide-3-kinase, catalytic, beta polypeptide   |
| 8016444 | HOXB3   | 1.1994123 | up | homeobox B3                                              |
| 8081657 | CD200   | 1.1989518 | up |                                                          |
| 8017927 | ABCA9   | 1.1981688 | up | ATP-binding cassette, sub-family A (ABC1), member 9      |
| 8179861 | SLC44A4 | 1.1980344 | up | solute carrier family 44, member 4                       |
| 8164810 | RALGDS  | 1.1973735 | up | ral guanine nucleotide dissociation stimulator           |
| 7995907 | CETP    | 1.1971176 | up | cholesteryl ester transfer protein, plasma               |
| 7918936 | VTCN1   | 1.1968547 | up | V-set domain containing T cell activation inhibitor 1    |
| 8133961 | RUNDC3B | 1.1968076 | up | RUN domain containing 3B                                 |
| 8089911 | HCLS1   | 1.1963452 | up | hematopoietic cell-specific Lyn substrate 1              |
| 8035297 | PLVAP   | 1.1958458 | up | plasmalemma vesicle associated protein                   |
| 7960529 | SCNN1A  | 1.1956266 | up | sodium channel, nonvoltage-gated 1 alpha                 |

Supplemental Table 1c  
eMSC vs. eSF

|         |                 |           |    |                                                         |
|---------|-----------------|-----------|----|---------------------------------------------------------|
| 8015759 | VAT1            | 1.1949596 | up | vesicle amine transport protein 1 homolog (T. californi |
| 8104693 | PDZD2           | 1.1947105 | up | PDZ domain containing 2                                 |
| 8132013 | CHN2            | 1.1946248 | up | chimerin (chimaerin) 2                                  |
| 8134552 | ARPC1B          | 1.1940275 | up | actin related protein 2/3 complex, subunit 1B, 41kDa    |
| 8121838 | TPD52L1         | 1.1938597 | up | tumor protein D52-like 1                                |
| 8091991 | MDS1            | 1.1937698 | up | myelodysplasia syndrome 1                               |
| 7924773 | CDC42BPA        | 1.1936606 | up | CDC42 binding protein kinase alpha (DMPK-like)          |
| 8178811 | HLA-DRB3 HLA-DI | 1.1934355 | up |                                                         |
| 8111339 | MTMR12          | 1.1911637 | up | myotubularin related protein 12                         |
| 8011713 | CXCL16          | 1.1911395 | up | chemokine (C-X-C motif) ligand 16                       |
| 7984843 | ARID3B          | 1.1899667 | up | AT rich interactive domain 3B (BRIGHT-like)             |
| 8081838 | CDGAP           | 1.1899352 | up | Cdc42 GTPase-activating protein                         |
| 8166784 | TSPAN7          | 1.1898184 | up | tetraspanin 7                                           |
| 7909561 | C1orf97         | 1.1888981 | up | chromosome 1 open reading frame 97                      |
| 8099721 | KIAA0746 SERINC | 1.1888618 | up | KIAA0746 protein   serine incorporator 2                |
| 7922846 | FAM129A         | 1.1882439 | up | family with sequence similarity 129, member A           |
| 8044346 | FLJ38359 LOC100 | 1.1882011 | up | hypothetical protein FLJ38359   hypothetical protein L  |
| 8085999 | CMTM6           | 1.1881399 | up | CKLF-like MARVEL transmembrane domain containing        |
| 8046726 | SSFA2           | 1.1876069 | up | sperm specific antigen 2                                |
| 8059470 | IRS1            | 1.18731   | up | insulin receptor substrate 1                            |
| 8016468 | HOXB7           | 1.186739  | up | homeobox B7                                             |
| 8151369 | RPESP           | 1.1865509 | up | RPE-spondin                                             |
| 8105741 | MAST4 LOC1001   | 1.1861218 | up | microtubule associated serine/threonine kinase family   |
| 8117189 | KAAG1           | 1.1859802 | up | kidney associated antigen 1                             |
| 7999909 | GPRC5B          | 1.1853824 | up | G protein-coupled receptor, family C, group 5, member   |
| 8145293 | ADAM28          | 1.1852126 | up | ADAM metallopeptidase domain 28                         |
| 8168179 | DLG3            | 1.1843363 | up | discs, large homolog 3 (neuroendocrine-dlg, Drosophila  |
| 8054479 | MALL            | 1.1840043 | up | mal, T-cell differentiation protein-like                |
| 8079407 | CCRL2 LOC72781  | 1.1836016 | up | chemokine (C-C motif) receptor-like 2   similar to chen |
| 7920506 | SHE             | 1.1827911 | up | Src homology 2 domain containing E                      |
| 8097356 | PLK4            | 1.1827706 | up | polo-like kinase 4 (Drosophila)                         |
| 7910950 | KMO             | 1.1824621 | up | kynurenine 3-monooxygenase (kynurenine 3-hydroxylase    |
| 7933872 | EGR2            | 1.182386  | up | early growth response 2 (Krox-20 homolog, Drosophila    |

Supplemental Table 1c  
eMSC vs. eSF

|         |                |           |    |                                                                                          |
|---------|----------------|-----------|----|------------------------------------------------------------------------------------------|
| 8046542 | HOXD9          | 1.1821467 | up | homeobox D9                                                                              |
| 8028908 | ITPKC          | 1.1820192 | up | inositol 1,4,5-trisphosphate 3-kinase C                                                  |
| 8048026 | CPS1           | 1.1816792 | up | carbamoyl-phosphate synthetase 1, mitochondrial                                          |
| 8042637 | DYSF           | 1.1816773 | up | dysferlin, limb girdle muscular dystrophy 2B (autosomal recessive)                       |
| 8022803 | FAM59A         | 1.181607  | up | family with sequence similarity 59, member A                                             |
| 8152812 | FAM84B         | 1.1811179 | up | family with sequence similarity 84, member B                                             |
| 8061013 | C20orf82       | 1.1809037 | up | chromosome 20 open reading frame 82                                                      |
| 8041763 | PRKCE          | 1.1796921 | up | protein kinase C, epsilon                                                                |
| 7980744 | RPS6KA5        | 1.1794983 | up | ribosomal protein S6 kinase, 90kDa, polypeptide 5                                        |
| 8093304 | CCRL2 LOC72781 | 1.1788726 | up | chemokine (C-C motif) receptor-like 2   similar to chemokine (C-C motif) receptor-like 2 |
| 8160637 | B4GALT1        | 1.1787517 | up | UDP-Gal:betaGlcNAc beta 1,4- galactosyltransferase, polypeptide 1                        |
| 8120402 | BAG2           | 1.1776785 | up | BCL2-associated athanogene 2                                                             |
| 7975238 | PLEKHH1        | 1.1762182 | up | pleckstrin homology domain containing, family H (with SH2 domain)                        |
| 7932420 | PTPLA          | 1.1760333 | up | protein tyrosine phosphatase-like (proline instead of conserved tyrosine)                |
| 8146092 | INDO           | 1.1748272 | up | indoleamine-pyrrole 2,3 dioxygenase                                                      |
| 7941104 | ARL2 SNX15     | 1.1747483 | up | ADP-ribosylation factor-like 2   sorting nexin 15                                        |
| 7986411 | MEF2A          | 1.1742295 | up | myocyte enhancer factor 2A                                                               |
| 8017547 | ICAM2          | 1.174177  | up | intercellular adhesion molecule 2                                                        |
| 7909890 | HLX            | 1.1740062 | up | H2.0-like homeobox                                                                       |
| 7906469 | DUSP23         | 1.1732901 | up | dual specificity phosphatase 23                                                          |
| 7948612 | FADS1 FADS3    | 1.1732877 | up | fatty acid desaturase 1   fatty acid desaturase 3                                        |
| 8052735 | CNRIP1         | 1.1731625 | up | cannabinoid receptor interacting protein 1                                               |
| 8180100 | HLA-DPA1       | 1.1724504 | up | major histocompatibility complex, class II, DP alpha 1                                   |
| 8104570 | FAM105A        | 1.1722592 | up | family with sequence similarity 105, member A                                            |
| 7999387 | EMP2           | 1.1719625 | up | epithelial membrane protein 2                                                            |
| 7978712 | CLEC14A        | 1.1718148 | up | C-type lectin domain family 14, member A                                                 |
| 7953626 | CLSTN3         | 1.1717032 | up | calsyntenin 3                                                                            |
| 8072603 | LOC100130269   | 1.170385  | up | similar to Putative uncharacterized protein FLJ36925                                     |
| 8167305 | EBP            | 1.170137  | up | emopamil binding protein (sterol isomerase)                                              |
| 8099967 | RBM47          | 1.1690141 | up | RNA binding motif protein 47                                                             |
| 8180003 | HLA-DRB3 HLA-D | 1.1689016 | up |                                                                                          |
| 8091385 | CP             | 1.1688881 | up | ceruloplasmin (ferroxidase)                                                              |
| 8048717 | SGPP2          | 1.1675854 | up | sphingosine-1-phosphate phosphatase 2                                                    |

Supplemental Table 1c  
eMSC vs. eSF

|         |           |           |    |                                                         |
|---------|-----------|-----------|----|---------------------------------------------------------|
| 7987405 | RASGRP1   | 1.166719  | up | RAS guanyl releasing protein 1 (calcium and DAG-regul   |
| 7905881 | ADAM15    | 1.1659172 | up | ADAM metallopeptidase domain 15                         |
| 8174103 | GK GK3P   | 1.1657379 | up | glycerol kinase   glycerol kinase 3 pseudogene          |
| 8047659 | ABI2      | 1.1653718 | up | abl interactor 2                                        |
| 8044462 | TTL       | 1.1653525 | up | tubulin tyrosine ligase                                 |
| 8077899 | PPARG     | 1.1647658 | up | peroxisome proliferator-activated receptor gamma        |
| 7987192 | SLC12A6   | 1.1646569 | up | solute carrier family 12 (potassium/chloride transporte |
| 7987454 | BMF       | 1.1641239 | up | Bcl2 modifying factor                                   |
| 7963328 | FIGNL2    | 1.1635551 | up | fidgetin-like 2                                         |
| 7936115 | SH3PXD2A  | 1.1632738 | up | SH3 and PX domains 2A                                   |
| 8112342 | ADAMTS6   | 1.1627301 | up | ADAM metallopeptidase with thrombospondin type 1        |
| 8129783 | MAP7      | 1.1626263 | up | microtubule-associated protein 7                        |
| 8110084 | MSX2      | 1.1623641 | up | msh homeobox 2                                          |
| 8138466 | 7A5       | 1.1623604 | up | putative binding protein 7a5                            |
| 8106403 | F2RL1     | 1.1622573 | up | coagulation factor II (thrombin) receptor-like 1        |
| 7997504 | CDH13     | 1.1619948 | up | cadherin 13, H-cadherin (heart)                         |
| 8116932 | PHACTR1   | 1.1617253 | up | phosphatase and actin regulator 1                       |
| 7906878 | DDR2      | 1.1615812 | up | discoidin domain receptor tyrosine kinase 2             |
| 8091778 | SCARNA7   | 1.1614054 | up | small Cajal body-specific RNA 7                         |
| 8137566 | RNF32     | 1.1611444 | up | ring finger protein 32                                  |
| 7910600 | KIAA1804  | 1.1598214 | up | mixed lineage kinase 4                                  |
| 8029437 | PVR       | 1.1596507 | up | poliovirus receptor                                     |
| 8106350 | NBLA11895 | 1.159601  | up | putative protein product of Nbla11895                   |
| 8083757 | NMD3      | 1.1589609 | up |                                                         |
| 8068671 | BACE2     | 1.1582135 | up | beta-site APP-cleaving enzyme 2                         |
| 8049246 | INPP5D    | 1.1580784 | up | inositol polyphosphate-5-phosphatase, 145kDa            |
| 8125556 | HLA-DPA1  | 1.1578671 | up | major histocompatibility complex, class II, DP alpha 1  |
| 7943795 | C11orf52  | 1.1575174 | up | chromosome 11 open reading frame 52                     |
| 8161255 | SHB CKAP2 | 1.1574582 | up | Src homology 2 domain containing adaptor protein B      |
| 8013319 | GRAP      | 1.1560472 | up | GRB2-related adaptor protein                            |
| 8105828 | CCNB1     | 1.1558402 | up | cyclin B1                                               |
| 8178891 | HLA-DPA1  | 1.1553437 | up | major histocompatibility complex, class II, DP alpha 1  |
| 7915926 | STIL      | 1.1548623 | up | SCL/TAL1 interrupting locus                             |



Supplemental Table 1c  
eMSC vs. eSF

|         |                 |           |    |                                                        |
|---------|-----------------|-----------|----|--------------------------------------------------------|
| 8091546 | LOC645843       | 1.1545744 | up | transmembrane protein 14-like                          |
| 8005549 | LOC400581       | 1.1538328 | up | GRB2-related adaptor protein-like                      |
| 7967002 | PXN             | 1.15378   | up | paxillin                                               |
| 8095744 | AREG LOC727738  | 1.1535017 | up | amphiregulin (schwannoma-derived growth factor)   s    |
| 8009183 | MAP3K3          | 1.153202  | up | mitogen-activated protein kinase kinase kinase 3       |
| 8054580 | BUB1            | 1.1516277 | up |                                                        |
| 7986701 | HERC2P2 LOC283  | 1.1509608 | up | hect domain and RLD 2 pseudogene 2   hypothetical p    |
| 8177498 | MARVELD2        | 1.1509318 | up | MARVEL domain containing 2                             |
| 8017057 | C17orf47        | 1.150482  | up | chromosome 17 open reading frame 47                    |
| 8072735 | APOL1           | 1.1502846 | up | apolipoprotein L, 1                                    |
| 8077323 | CNTN4           | 1.150082  | up | contactin 4                                            |
| 8041383 | LTBP1           | 1.1499585 | up | latent transforming growth factor beta binding protein |
| 8112274 | ELOVL7          | 1.14993   | up | ELOVL family member 7, elongation of long chain fatty  |
| 8095736 | AREG LOC727738  | 1.1498141 | up | amphiregulin (schwannoma-derived growth factor)   s    |
| 7918517 | WDR77           | 1.1495385 | up | WD repeat domain 77                                    |
| 7912347 | CASZ1           | 1.14927   | up | castor zinc finger 1                                   |
| 8018264 | C17orf28        | 1.1473148 | up | chromosome 17 open reading frame 28                    |
| 8131339 | FSCN1           | 1.147115  | up | fascin homolog 1, actin-bundling protein (Strongylocer |
| 8105899 | MARVELD2        | 1.1470536 | up | MARVEL domain containing 2                             |
| 8019954 | FLJ35776        | 1.1464698 | up | hypothetical protein LOC649446                         |
| 8129888 | NHSL1           | 1.1457964 | up | NHS-like 1                                             |
| 7923731 | RIPK5           | 1.1454068 | up | receptor interacting protein kinase 5                  |
| 7898693 | ALPL            | 1.1449944 | up | alkaline phosphatase, liver/bone/kidney                |
| 8003357 | FAM38A          | 1.1446029 | up | family with sequence similarity 38, member A           |
| 8134407 | DLX6            | 1.1445628 | up | distal-less homeobox 6                                 |
| 7908732 | IPO9            | 1.1445218 | up | importin 9                                             |
| 8104066 | SORBS2          | 1.1444403 | up | sorbin and SH3 domain containing 2                     |
| 8054513 | FLJ38359 LOC100 | 1.144383  | up | hypothetical protein FLJ38359   hypothetical protein L |
| 8042503 | MXD1            | 1.1437278 | up | MAX dimerization protein 1                             |
| 7926679 | KIAA1217        | 1.1430833 | up |                                                        |
| 7960764 | RBP5            | 1.1428621 | up | retinol binding protein 5, cellular                    |
| 8092177 | AADA1           | 1.141892  | up | arylacetamide deacetylase-like 1                       |
| 8058203 | ALS2CR12        | 1.1414467 | up | amyotrophic lateral sclerosis 2 (juvenile) chromosome  |

Supplemental Table 1c  
eMSC vs. eSF

|         |              |           |    |                                                         |
|---------|--------------|-----------|----|---------------------------------------------------------|
| 7958202 | CHST11       | 1.1404545 | up | carbohydrate (chondroitin 4) sulfotransferase 11        |
| 8054740 | PAX8         | 1.1400493 | up | paired box 8                                            |
| 7902518 | GIPC2        | 1.1399102 | up | GIPC PDZ domain containing family, member 2             |
| 8122365 | GPR126       | 1.1396093 | up | G protein-coupled receptor 126                          |
| 7939150 | PRRG4        | 1.1380507 | up | proline rich Gla (G-carboxyglutamic acid) 4 (transmembr |
| 8122396 | AIG1         | 1.1374671 | up | androgen-induced 1                                      |
| 7980773 | CCDC88C      | 1.1365784 | up | coiled-coil domain containing 88C                       |
| 7997158 | MARVELD3     | 1.136375  | up | MARVEL domain containing 3                              |
| 8109120 | AFAP1L1      | 1.1362549 | up | actin filament associated protein 1-like 1              |
| 7928944 | PAPSS2       | 1.1358167 | up | 3'-phosphoadenosine 5'-phosphosulfate synthase 2        |
| 8058498 | FZD5         | 1.135672  | up | frizzled homolog 5 (Drosophila)                         |
| 7926821 | MASTL        | 1.135473  | up | microtubule associated serine/threonine kinase-like     |
| 8036252 | CLIP3        | 1.135165  | up | CAP-GLY domain containing linker protein 3              |
| 7972936 | FAM70B       | 1.135075  | up | family with sequence similarity 70, member B            |
| 8169949 | RP6-213H19.1 | 1.1350114 | up | serine/threonine protein kinase MST4                    |
| 8113512 | EPB41L4A     | 1.1348258 | up | erythrocyte membrane protein band 4.1 like 4A           |
| 8114780 | PCDH12       | 1.1347398 | up | protocadherin 12                                        |
| 7925531 | AKT3         | 1.1346254 | up | v-akt murine thymoma viral oncogene homolog 3 (prot     |
| 7934842 | MMRN2        | 1.134159  | up | multimerin 2                                            |
| 7949454 | MAP3K11      | 1.1334398 | up | mitogen-activated protein kinase kinase kinase 11       |
| 7976160 | TDP1         | 1.1330609 | up | tyrosyl-DNA phosphodiesterase 1                         |
| 8096753 | HADH         | 1.1323155 | up | hydroxyacyl-Coenzyme A dehydrogenase                    |
| 7945204 | ST14         | 1.1322223 | up | suppression of tumorigenicity 14 (colon carcinoma)      |
| 7923967 | YOD1         | 1.1320788 | up |                                                         |
| 7933760 | CCDC6        | 1.1319592 | up | coiled-coil domain containing 6                         |
| 8172254 | CXorf36      | 1.1318485 | up | chromosome X open reading frame 36                      |
| 7900658 | TIE1         | 1.1315976 | up | tyrosine kinase with immunoglobulin-like and EGF-like   |
| 7980098 | ALDH6A1      | 1.1313338 | up | aldehyde dehydrogenase 6 family, member A1              |
| 7958913 | OAS2         | 1.1303166 | up | 2'-5'-oligoadenylate synthetase 2, 69/71kDa             |
| 7916506 | C1orf168     | 1.1296415 | up | chromosome 1 open reading frame 168                     |
| 8042416 | ARHGAP25     | 1.1294878 | up | Rho GTPase activating protein 25                        |
| 8014349 | CCL14 CCL15  | 1.129468  | up | chemokine (C-C motif) ligand 14   chemokine (C-C mot    |
| 8167287 | PORCN        | 1.1290336 | up | porcupine homolog (Drosophila)                          |

Supplemental Table 1c  
eMSC vs. eSF

|         |                |           |    |                                                            |
|---------|----------------|-----------|----|------------------------------------------------------------|
| 7929288 | EXOC6          | 1.1282845 | up | exocyst complex component 6                                |
| 7940191 | STX3           | 1.1281617 | up | syntaxin 3                                                 |
| 7943387 | C11orf70       | 1.127963  | up | chromosome 11 open reading frame 70                        |
| 7974697 | DAAM1          | 1.1272515 | up | dishevelled associated activator of morphogenesis 1        |
| 8124897 | PSORS1C3 LOC10 | 1.1267757 | up | psoriasis susceptibility 1 candidate 3   similar to psoria |
| 8074131 | SHANK3         | 1.1267296 | up | SH3 and multiple ankyrin repeat domains 3                  |
| 8016476 | HOXB9          | 1.1266167 | up | homeobox B9                                                |
| 7903393 | S1PR1          | 1.1264255 | up | sphingosine-1-phosphate receptor 1                         |
| 8179727 | PSORS1C3 LOC10 | 1.1264198 | up | psoriasis susceptibility 1 candidate 3   similar to psoria |
| 7954090 | EMP1           | 1.1261445 | up | epithelial membrane protein 1                              |
| 8131719 | DNAH11         | 1.1252317 | up | dynein, axonemal, heavy chain 11                           |
| 8116818 | BMP6           | 1.1251018 | up | bone morphogenetic protein 6                               |
| 7962579 | AMIGO2         | 1.1250128 | up | adhesion molecule with Ig-like domain 2                    |
| 7980309 | C14orf1        | 1.1244124 | up | chromosome 14 open reading frame 1                         |
| 7907861 | XPR1           | 1.1241056 | up | xenotropic and polytropic retrovirus receptor              |
| 8058824 | MREG           | 1.1235979 | up | melanoregulin                                              |
| 8127502 | C6orf155       | 1.123455  | up | chromosome 6 open reading frame 155                        |
| 8143961 | PRKAG2         | 1.1232136 | up | protein kinase, AMP-activated, gamma 2 non-catalytic       |
| 8152491 | EXT1           | 1.1231406 | up | exostoses (multiple) 1                                     |
| 7905147 | C1orf54        | 1.1223767 | up | chromosome 1 open reading frame 54                         |
| 7943218 | PANX1          | 1.1221926 | up | pannexin 1                                                 |
| 8044008 | IL1RL2         | 1.1215981 | up | interleukin 1 receptor-like 2                              |
| 7986329 | NR2F2          | 1.1209939 | up | nuclear receptor subfamily 2, group F, member 2            |
| 8104492 | ROPN1L         | 1.1204737 | up | ropporin 1-like                                            |
| 8070458 | PLAC4          | 1.1204197 | up | placenta-specific 4                                        |
| 7920472 | TPM3           | 1.1191552 | up | tropomyosin 3                                              |
| 8056184 | ITGB6          | 1.1188596 | up | integrin, beta 6                                           |
| 8171481 | AP1S2          | 1.1185299 | up | adaptor-related protein complex 1, sigma 2 subunit         |
| 8147766 | FZD6           | 1.1184124 | up | frizzled homolog 6 (Drosophila)                            |
| 8092392 | KLHL6          | 1.1183003 | up | kelch-like 6 (Drosophila)                                  |
| 8139680 | COBL           | 1.1181235 | up | cordon-bleu homolog (mouse)                                |
| 7918902 | CD58           | 1.118003  | up |                                                            |
| 7905754 | ATP8B2         | 1.1178497 | up | ATPase, class I, type 8B, member 2                         |

Supplemental Table 1c  
eMSC vs. eSF

|         |                |           |    |                                                            |
|---------|----------------|-----------|----|------------------------------------------------------------|
| 8129618 | VNN1           | 1.1170121 | up | vanin 1                                                    |
| 7941401 | OVOL1          | 1.1169513 | up | ovo-like 1(Drosophila)                                     |
| 8148280 | SQLE           | 1.1167686 | up | squalene epoxidase                                         |
| 7915170 | MYCBP GJA9     | 1.1166675 | up | c-myc binding protein   gap junction protein, alpha 9, !   |
| 7920285 | S100A2         | 1.1165508 | up | S100 calcium binding protein A2                            |
| 8138689 | SKAP2          | 1.1165489 | up | src kinase associated phosphoprotein 2                     |
| 8037835 | SLC1A5         | 1.1163998 | up | solute carrier family 1 (neutral amino acid transporter)   |
| 8080487 | PRKCD          | 1.1156114 | up | protein kinase C, delta                                    |
| 8178211 | PSMB9          | 1.115323  | up | proteasome (prosome, macropain) subunit, beta type,        |
| 8016414 | SKAP1          | 1.1152959 | up | src kinase associated phosphoprotein 1                     |
| 8081219 | ST3GAL6        | 1.1148474 | up | ST3 beta-galactoside alpha-2,3-sialyltransferase 6         |
| 8091327 | PLSCR1         | 1.114802  | up | phospholipid scramblase 1                                  |
| 8091922 | WDR49          | 1.1145632 | up | WD repeat domain 49                                        |
| 7967456 | RILPL2         | 1.1142517 | up | Rab interacting lysosomal protein-like 2                   |
| 7982154 | HERC2P2 LOC283 | 1.1141598 | up | hect domain and RLD 2 pseudogene 2   hypothetical p        |
| 8118571 | PSMB9          | 1.1139889 | up | proteasome (prosome, macropain) subunit, beta type,        |
| 8179495 | PSMB9          | 1.1136713 | up | proteasome (prosome, macropain) subunit, beta type,        |
| 8157446 | ORM1           | 1.1131215 | up | orosomuroid 1                                              |
| 7919596 | LOC440570      | 1.1124412 | up |                                                            |
| 8154135 | SLC1A1         | 1.1124245 | up | solute carrier family 1 (neuronal/epithelial high affinity |
| 7967107 | C12orf27       | 1.1120048 | up | chromosome 12 open reading frame 27                        |
| 8175023 | ZDHHC9         | 1.1115179 | up | zinc finger, DHHC-type containing 9                        |
| 7919580 | LOC440570      | 1.1113772 | up |                                                            |
| 8155930 | GCNT1          | 1.1108071 | up | glucosaminyl (N-acetyl) transferase 1, core 2 (beta-1,6-   |
| 8094759 | NSUN7          | 1.1100519 | up | NOL1/NOP2/Sun domain family, member 7                      |
| 8080344 | STAB1          | 1.1100124 | up | stabilin 1                                                 |
| 8066542 | SPINLW1 WFDC6  | 1.109886  | up | serine peptidase inhibitor-like, with Kunitz and WAP dc    |
| 8140468 | tcag7.1314     | 1.109517  | up | hypothetical protein LOC54103                              |
| 8037205 | CEACAM1        | 1.1093076 | up | carcinoembryonic antigen-related cell adhesion molecu      |
| 8137280 | NOS3           | 1.1091505 | up | nitric oxide synthase 3 (endothelial cell)                 |
| 8070467 | TMPRSS2        | 1.1088141 | up | transmembrane protease, serine 2                           |
| 7961111 | CLEC1A         | 1.1086856 | up | C-type lectin domain family 1, member A                    |
| 8048864 | CCL20          | 1.1084903 | up | chemokine (C-C motif) ligand 20                            |

Supplemental Table 1c  
eMSC vs. eSF

|         |              |           |    |                                                            |
|---------|--------------|-----------|----|------------------------------------------------------------|
| 8095139 | SRD5A3       | 1.1081543 | up | steroid 5 alpha-reductase 3                                |
| 8100984 | CXCL3        | 1.1079304 | up | chemokine (C-X-C motif) ligand 3                           |
| 8008185 | ABI3         | 1.1079234 | up | ABI gene family, member 3                                  |
| 7970162 | ATP11A       | 1.107415  | up | ATPase, class VI, type 11A                                 |
| 8021286 | C18orf54     | 1.1055868 | up | chromosome 18 open reading frame 54                        |
| 8074856 | PRAME        | 1.1050833 | up | preferentially expressed antigen in melanoma               |
| 8166925 | MAOA         | 1.1040872 | up | monoamine oxidase A                                        |
| 7954559 | PPFIBP1      | 1.1034901 | up | PTPRF interacting protein, binding protein 1 (liprin beta) |
| 8099467 | FGFBP1       | 1.1034033 | up | fibroblast growth factor binding protein 1                 |
| 7940565 | FADS2        | 1.1031823 | up | fatty acid desaturase 2                                    |
| 8096511 | BMPR1B       | 1.1029058 | up | bone morphogenetic protein receptor, type IB               |
| 8144712 | C8orf79      | 1.1028839 | up | chromosome 8 open reading frame 79                         |
| 8059413 | DOCK10       | 1.102845  | up | dedicator of cytokinesis 10                                |
| 7926451 | MRC1 MRC1L1  | 1.1014766 | up | mannose receptor, C type 1   mannose receptor, C type 1    |
| 7982854 | DLL4         | 1.1010691 | up | delta-like 4 (Drosophila)                                  |
| 8102532 | PDE5A        | 1.100715  | up | phosphodiesterase 5A, cGMP-specific                        |
| 8119525 | HCRP1        | 1.1001242 | up |                                                            |
| 7926410 | MRC1 MRC1L1  | 1.0998957 | up | mannose receptor, C type 1   mannose receptor, C type 1    |
| 8038163 | RASIP1       | 1.0993038 | up | Ras interacting protein 1                                  |
| 8090630 | TMCC1        | 1.0986605 | up | transmembrane and coiled-coil domain family 1              |
| 8126853 | C6orf138     | 1.0977213 | up | chromosome 6 open reading frame 138                        |
| 8125530 | HLA-DMB      | 1.09701   | up | major histocompatibility complex, class II, DM beta        |
| 7979196 | GNPNAT1      | 1.0969772 | up | glucosamine-phosphate N-acetyltransferase 1                |
| 8101675 | ABCG2        | 1.096871  | up | ATP-binding cassette, sub-family G (WHITE), member 2       |
| 8115261 | CCDC69       | 1.0968535 | up | coiled-coil domain containing 69                           |
| 8064868 | RP5-1022P6.2 | 1.0967942 | up | hypothetical protein KIAA1434                              |
| 7926531 | ARL5B        | 1.0967675 | up | ADP-ribosylation factor-like 5B                            |
| 8052731 | WDR92        | 1.0963048 | up | WD repeat domain 92                                        |
| 8113504 | C5orf13      | 1.0957621 | up | chromosome 5 open reading frame 13                         |
| 8171392 | ASB9         | 1.0955253 | up | ankyrin repeat and SOCS box-containing 9                   |
| 8001547 | PLLP         | 1.0950793 | up | plasma membrane proteolipid (plasmolipin)                  |
| 7972003 | KLF12        | 1.0950067 | up | Kruppel-like factor 12                                     |
| 8109141 | GRPEL2       | 1.0948026 | up | GrpE-like 2, mitochondrial (E. coli)                       |

Supplemental Table 1c  
eMSC vs. eSF

|         |                |           |    |                                                           |
|---------|----------------|-----------|----|-----------------------------------------------------------|
| 8066786 | ZMYND8         | 1.0947832 | up | zinc finger, MYND-type containing 8                       |
| 7968035 | SPATA13 C1QTNF | 1.0944448 | up | spermatogenesis associated 13   C1q and tumor necro       |
| 7931977 | ITIH5          | 1.0943258 | up | inter-alpha (globulin) inhibitor H5                       |
| 8180078 | HLA-DMB        | 1.09421   | up | major histocompatibility complex, class II, DM beta       |
| 7983111 | SNAP23         | 1.0936344 | up | synaptosomal-associated protein, 23kDa                    |
| 7988990 | WDR72          | 1.0934001 | up | WD repeat domain 72                                       |
| 7924055 | C1orf74        | 1.0930351 | up | chromosome 1 open reading frame 74                        |
| 8161774 | TRPM6          | 1.092657  | up | transient receptor potential cation channel, subfamily    |
| 8027748 | FXVD3          | 1.0923926 | up | FXVD domain containing ion transport regulator 3          |
| 8148448 | KHDRBS3        | 1.0920453 | up | KH domain containing, RNA binding, signal transductio     |
| 7956120 | ERBB3          | 1.0918103 | up | v-erb-b2 erythroblastic leukemia viral oncogene homol     |
| 7995838 | MT1X           | 1.0912448 | up | metallothionein 1X                                        |
| 7906079 | RAB25          | 1.0911238 | up |                                                           |
| 8146934 | LY96           | 1.0899612 | up | lymphocyte antigen 96                                     |
| 8090823 | SLCO2A1        | 1.0892178 | up | solute carrier organic anion transporter family, membe    |
| 7905428 | TUFT1          | 1.0892032 | up | tuftelin 1                                                |
| 7974902 | RHOJ           | 1.0891955 | up | ras homolog gene family, member J                         |
| 7932407 | ST8SIA6        | 1.0891354 | up | ST8 alpha-N-acetyl-neuraminide alpha-2,8-sialyltransfe    |
| 7975081 | C14orf50       | 1.087644  | up | chromosome 14 open reading frame 50                       |
| 8096130 | CDS1           | 1.0871904 | up | CDP-diacylglycerol synthase (phosphatidate cytidyltr      |
| 7954077 | KIAA1467       | 1.0865419 | up |                                                           |
| 8089867 | RABL3          | 1.0864842 | up | RAB, member of RAS oncogene family-like 3                 |
| 8021695 | DOK6           | 1.0862889 | up | docking protein 6                                         |
| 7914270 | LAPTM5         | 1.0860487 | up | lysosomal associated multispinning membrane proteir       |
| 7909866 | MOSC2          | 1.0852319 | up | MOCO sulphurase C-terminal domain containing 2            |
| 8027402 | CCNE1          | 1.0849658 | up | cyclin E1                                                 |
| 7974851 | HIF1A          | 1.0846345 | up | hypoxia-inducible factor 1, alpha subunit (basic helix-lc |
| 8171762 | RPS6KA3        | 1.0835176 | up | ribosomal protein S6 kinase, 90kDa, polypeptide 3         |
| 8002283 | TMED6          | 1.0832635 | up | transmembrane emp24 protein transport domain cont         |
| 8057797 | SDPR           | 1.083243  | up | serum deprivation response (phosphatidylserine bindir     |
| 8125537 | HLA-DMA        | 1.0829431 | up | major histocompatibility complex, class II, DM alpha      |
| 7945371 | IFITM3         | 1.0823841 | up | interferon induced transmembrane protein 3 (1-8U)         |
| 7954729 | FGD4           | 1.0819927 | up | FYVE, RhoGEF and PH domain containing 4                   |

Supplemental Table 1c  
eMSC vs. eSF

|         |                |           |    |                                                                 |
|---------|----------------|-----------|----|-----------------------------------------------------------------|
| 8045882 | DAPL1          | 1.0817547 | up | death associated protein-like 1                                 |
| 7968351 | C13orf33       | 1.0817323 | up | chromosome 13 open reading frame 33                             |
| 8136954 | FAM139B LOC655 | 1.0815265 | up | family with sequence similarity 139, member B   similar         |
| 8136987 | ARHGEF5 LOC728 | 1.0807493 | up | Rho guanine nucleotide exchange factor (GEF) 5   similar        |
| 8111569 | RANBP3L        | 1.0807124 | up | RAN binding protein 3-like                                      |
| 7965343 | WDR51B GALNT4  | 1.0800045 | up | WD repeat domain 51B   UDP-N-acetyl-alpha-D-galactose           |
| 8044080 | SLC9A2         | 1.0793715 | up | solute carrier family 9 (sodium/hydrogen exchanger), member 2   |
| 7925929 | AKR1C3         | 1.0793004 | up | aldo-keto reductase family 1, member C3 (3-alpha hydroxysteroid |
| 8083743 | ARL14          | 1.0792321 | up | ADP-ribosylation factor-like 14                                 |
| 8163437 | SLC46A2        | 1.0790344 | up | solute carrier family 46, member 2                              |
| 7959123 | PRKAB1         | 1.0786912 | up | protein kinase, AMP-activated, beta 1 non-catalytic subunit     |
| 8171418 | PIGA           | 1.0782782 | up | phosphatidylinositol glycan anchor biosynthesis, class I        |
| 7914516 | LOC339483      | 1.0781516 | up |                                                                 |
| 7982564 | SPRED1         | 1.0771731 | up | sprouty-related, EVH1 domain containing 1                       |
| 8058927 | TMBIM1         | 1.0771682 | up | transmembrane BAX inhibitor motif containing 1                  |
| 8143781 | GIMAP6         | 1.0769095 | up | GTPase, IMAP family member 6                                    |
| 7955562 | ACVRL1         | 1.0768422 | up | activin A receptor type II-like 1                               |
| 7983145 | STARD9         | 1.0767632 | up | StAR-related lipid transfer (START) domain containing 9         |
| 8055606 | GTDC1          | 1.0767535 | up | glycosyltransferase-like domain containing 1                    |
| 8096556 | METAP1         | 1.0764236 | up | methionyl aminopeptidase 1                                      |
| 7945321 | GLB1L2         | 1.0763533 | up | galactosidase, beta 1-like 2                                    |
| 7906400 | IFI16          | 1.0763085 | up | interferon, gamma-inducible protein 16                          |
| 8178884 | HLA-DMA        | 1.0758635 | up | major histocompatibility complex, class II, DM alpha chain      |
| 8150112 | GSR            | 1.075852  | up | glutathione reductase                                           |
| 8146550 | SDCBP          | 1.0756884 | up | syndecan binding protein (syntenin)                             |
| 7997712 | IRF8           | 1.0749842 | up | interferon regulatory factor 8                                  |
| 8085062 | IL5RA          | 1.0748702 | up | interleukin 5 receptor, alpha                                   |
| 8016457 | HOXB5          | 1.0747447 | up | homeobox B5                                                     |
| 8036341 | ZNF461         | 1.074267  | up | zinc finger protein 461                                         |
| 7908940 | ATP2B4         | 1.074182  | up | ATPase, Ca <sup>++</sup> transporting, plasma membrane 4        |
| 8121886 | HINT3          | 1.073958  | up | histidine triad nucleotide binding protein 3                    |
| 7916541 | DAB1           | 1.0735502 | up | disabled homolog 1 (Drosophila)                                 |
| 7901140 | MAST2          | 1.0733864 | up | microtubule associated serine/threonine kinase 2                |

Supplemental Table 1c  
eMSC vs. eSF

|         |              |           |    |                                                         |
|---------|--------------|-----------|----|---------------------------------------------------------|
| 8012450 | SLC25A35     | 1.0728896 | up | solute carrier family 25, member 35                     |
| 8139131 | AMPH         | 1.0727043 | up | amphiphysin                                             |
| 8150036 | KIF13B       | 1.0726831 | up | kinesin family member 13B                               |
| 7994058 | SCNN1G       | 1.0725187 | up | sodium channel, nonvoltage-gated 1, gamma               |
| 7908351 | PLA2G4A      | 1.0722535 | up | phospholipase A2, group IVA (cytosolic, calcium-depen   |
| 8035095 | CYP4F11      | 1.0710182 | up | cytochrome P450, family 4, subfamily F, polypeptide 1:  |
| 7954436 | LRMP         | 1.0708871 | up | lymphoid-restricted membrane protein                    |
| 8138805 | CPVL         | 1.0707866 | up | carboxypeptidase, vitellogenic-like                     |
| 7917649 | TGFBR3       | 1.0703467 | up | transforming growth factor, beta receptor III           |
| 8014248 | SLFN13       | 1.0694476 | up | schlafen family member 13                               |
| 7911038 | ZNF238       | 1.0692952 | up | zinc finger protein 238                                 |
| 8061247 | RIN2         | 1.0691288 | up | Ras and Rab interactor 2                                |
| 8080714 | FLNB         | 1.069105  | up | filamin B, beta (actin binding protein 278)             |
| 7950307 | UCP2         | 1.0689011 | up | uncoupling protein 2 (mitochondrial, proton carrier)    |
| 8095986 | ANXA3        | 1.068724  | up | annexin A3                                              |
| 7983393 | SORD         | 1.0682384 | up | sorbitol dehydrogenase                                  |
| 7961075 | CD69         | 1.068036  | up |                                                         |
| 8083839 | GPR160       | 1.067892  | up | G protein-coupled receptor 160                          |
| 7968866 | C13orf30     | 1.0674949 | up | chromosome 13 open reading frame 30                     |
| 8030991 | LOC147804    | 1.067483  | up | tropomyosin 3 pseudogene                                |
| 8125383 | NOTCH4 GPSM3 | 1.0674607 | up | Notch homolog 4 (Drosophila)   G-protein signaling mc   |
| 7996908 | SNTB2        | 1.0673016 | up | syntrophin, beta 2 (dystrophin-associated protein A1, 5 |
| 8169995 | FAM122C      | 1.0672686 | up | family with sequence similarity 122C                    |
| 7951363 | CASP12       | 1.0670903 | up | caspase 12 (gene/pseudogene)                            |
| 8157058 | FSD1L        | 1.0661342 | up | fibronectin type III and SPRY domain containing 1-like  |
| 8074286 | MICAL3       | 1.0661019 | up | microtubule associated monooxygenase, calponin and L    |
| 8157632 | C9orf18      | 1.0658611 | up | chromosome 9 open reading frame 18                      |
| 8143040 | SLC35B4      | 1.0658156 | up | solute carrier family 35, member B4                     |
| 8104901 | IL7R         | 1.0657643 | up | interleukin 7 receptor                                  |
| 7931108 | DMBT1        | 1.0655843 | up | deleted in malignant brain tumors 1                     |
| 8108912 | SH3RF2       | 1.0654855 | up | SH3 domain containing ring finger 2                     |
| 8112584 | ZNF366       | 1.0650843 | up | zinc finger protein 366                                 |
| 8017061 | TEX14        | 1.0649264 | up | testis expressed 14                                     |



Supplemental Table 1c  
eMSC vs. eSF

|         |                 |           |    |                                                               |
|---------|-----------------|-----------|----|---------------------------------------------------------------|
| 8033362 | INSR            | 1.0643296 | up | insulin receptor                                              |
| 7929976 | RP11-529I10.4   | 1.0641761 | up | deleted in a mouse model of primary ciliary dyskinesia        |
| 7898988 | CLIC4           | 1.0634605 | up | chloride intracellular channel 4                              |
| 8135341 | FLJ23834        | 1.0634129 | up |                                                               |
| 8136940 | FAM139A         | 1.0632559 | up | family with sequence similarity 139, member A                 |
| 8117382 | HIST1H2BD       | 1.0630344 | up | histone cluster 1, H2bd                                       |
| 8096314 | PKD2            | 1.0626206 | up | polycystic kidney disease 2 (autosomal dominant)              |
| 8090180 | MUC13           | 1.0624853 | up | mucin 13, cell surface associated                             |
| 8149574 | CSGALNACT1      | 1.0623908 | up | chondroitin sulfate N-acetylgalactosaminyltransferase         |
| 8097801 | LOC729830       | 1.0618896 | up | similar to CG3558-PA, isoform A                               |
| 8111739 | FYB             | 1.0617658 | up |                                                               |
| 8116910 | HIVEP1          | 1.0617151 | up | human immunodeficiency virus type I enhancer bindin           |
| 8180086 | HLA-DMA         | 1.0611941 | up | major histocompatibility complex, class II, DM alpha          |
| 8161865 | PRUNE2 LOC1001  | 1.061161  | up | prune homolog 2 (Drosophila)   similar to KIAA0367            |
| 7969576 | MIRHG1          | 1.0604094 | up | microRNA host gene (non-protein coding) 1                     |
| 7914809 | KIAA0319L       | 1.0603871 | up | KIAA0319-like                                                 |
| 8171516 | RBBP7           | 1.0598134 | up | retinoblastoma binding protein 7                              |
| 8088642 | LRIG1           | 1.0595534 | up | leucine-rich repeats and immunoglobulin-like domains          |
| 8075569 | SLC5A4          | 1.0593929 | up | solute carrier family 5 (low affinity glucose cotransport     |
| 8044818 | hCG_17324       | 1.0585238 | up | primary ciliary dyskinesia protein 1                          |
| 8122279 | KIAA1244 LOC20; | 1.0583886 | up | KIAA1244   hypothetical protein LOC202451                     |
| 7968637 | CCNA1           | 1.0582193 | up | cyclin A1                                                     |
| 8135363 | PIK3CG          | 1.0581601 | up | phosphoinositide-3-kinase, catalytic, gamma polypepti         |
| 8105061 | FYB             | 1.0571969 | up |                                                               |
| 8068761 | ABCG1           | 1.0569756 | up | ATP-binding cassette, sub-family G (WHITE), member 1          |
| 7932765 | MPP7            | 1.0568218 | up | membrane protein, palmitoylated 7 (MAGUK p55 subf;            |
| 7976496 | SERPINA3        | 1.0566702 | up | serpin peptidase inhibitor, clade A (alpha-1 antiprotein      |
| 8065607 | PLAGL2          | 1.0564454 | up | pleiomorphic adenoma gene-like 2                              |
| 8116848 | PAK1IP1         | 1.056392  | up | PAK1 interacting protein 1                                    |
| 8102050 | NHEDC2          | 1.056376  | up | Na <sup>+</sup> /H <sup>+</sup> exchanger domain containing 2 |
| 7917576 | GBP5            | 1.0559992 | up | guanylate binding protein 5                                   |
| 8079598 | ZNF589          | 1.0555555 | up | zinc finger protein 589                                       |
| 7945680 | H19             | 1.0554106 | up |                                                               |

Supplemental Table 1c  
eMSC vs. eSF

|         |                |           |    |                                                         |
|---------|----------------|-----------|----|---------------------------------------------------------|
| 8016847 | TRIM25         | 1.0549306 | up | tripartite motif-containing 25                          |
| 8169492 | AGTR2          | 1.0547763 | up | angiotensin II receptor, type 2                         |
| 8159919 | C9orf68        | 1.0547378 | up | chromosome 9 open reading frame 68                      |
| 8073645 | SAMM50 LOC100  | 1.0546294 | up | sorting and assembly machinery component 50 homol       |
| 8062557 | PPP1R16B       | 1.0543509 | up | protein phosphatase 1, regulatory (inhibitor) subunit 1 |
| 8039687 | ZNF552         | 1.0542784 | up | zinc finger protein 552                                 |
| 8063351 | SLC9A8         | 1.0541332 | up | solute carrier family 9 (sodium/hydrogen exchanger), r  |
| 7926622 | SPAG6          | 1.0540854 | up | sperm associated antigen 6                              |
| 8007348 | RAMP2          | 1.054059  | up | receptor (G protein-coupled) activity modifying proteir |
| 8174474 | ACSL4          | 1.0537525 | up | acyl-CoA synthetase long-chain family member 4          |
| 8063601 | C20orf85       | 1.0532777 | up | chromosome 20 open reading frame 85                     |
| 8156043 | PSAT1          | 1.0526162 | up | phosphoserine aminotransferase 1                        |
| 8088866 | CNTN3          | 1.0525789 | up | contactin 3 (plasmacytoma associated)                   |
| 8132439 | C7orf10        | 1.0523067 | up | chromosome 7 open reading frame 10                      |
| 7930593 | C10orf81       | 1.0522794 | up | chromosome 10 open reading frame 81                     |
| 7904361 | FAM46C         | 1.0520403 | up | family with sequence similarity 46, member C            |
| 7922301 | MYOC           | 1.0519378 | up | myocilin, trabecular meshwork inducible glucocorticoic  |
| 8147891 | PKHD1L1        | 1.0516877 | up | polycystic kidney and hepatic disease 1 (autosomal rec  |
| 8101086 | NAAA           | 1.0514749 | up | N-acylethanolamine acid amidase                         |
| 8013906 | TWF1           | 1.0513093 | up | twinfilin, actin-binding protein, homolog 1 (Drosophila |
| 7918294 | C1orf194       | 1.0491059 | up | chromosome 1 open reading frame 194                     |
| 8125436 | HLA-DRB5 LOC10 | 1.0490297 | up |                                                         |
| 7970441 | GJB2           | 1.0489712 | up | gap junction protein, beta 2, 26kDa                     |
| 8078066 | FGD5           | 1.0488461 | up | FYVE, RhoGEF and PH domain containing 5                 |
| 8123101 | LOC100130967 C | 1.0484905 | up | similar to hCG2044932   chromosome 6 open reading       |
| 8004842 | ARHGEF15       | 1.0482922 | up | Rho guanine nucleotide exchange factor (GEF) 15         |
| 7903893 | CD53           | 1.0479523 | up |                                                         |
| 8130191 | RMND1          | 1.0472748 | up | required for meiotic nuclear division 1 homolog (S. cer |
| 8174076 | GLA            | 1.0466917 | up | galactosidase, alpha                                    |
| 7993638 | TMC5           | 1.0462806 | up | transmembrane channel-like 5                            |
| 7957023 | LYZ            | 1.0459745 | up | lysozyme (renal amyloidosis)                            |
| 7933010 | PARD3          | 1.0456766 | up | par-3 partitioning defective 3 homolog (C. elegans)     |
| 8034084 | AP1M2          | 1.0453106 | up | adaptor-related protein complex 1, mu 2 subunit         |

Supplemental Table 1c  
eMSC vs. eSF

|         |                   |           |    |                                                          |
|---------|-------------------|-----------|----|----------------------------------------------------------|
| 7943740 | FLJ46266          | 1.0448624 | up |                                                          |
| 8136248 | MEST              | 1.0443001 | up | mesoderm specific transcript homolog (mouse)             |
| 7976488 | SERPINA5          | 1.0430707 | up | serpin peptidase inhibitor, clade A (alpha-1 antiprotein |
| 8045835 | GALNT5            | 1.0421306 | up | UDP-N-acetyl-alpha-D-galactosamine:polypeptide N-ac      |
| 7952927 | B4GALNT3          | 1.0418205 | up | beta-1,4-N-acetyl-galactosaminyl transferase 3           |
| 8144089 | LMBR1             | 1.0415071 | up | limb region 1 homolog (mouse)                            |
| 7909877 | MOSC1             | 1.0411614 | up | MOCO sulphurase C-terminal domain containing 1           |
| 8099121 | STX18             | 1.0408248 | up | syntaxin 18                                              |
| 8120061 | ENPP4             | 1.0402721 | up | ectonucleotide pyrophosphatase/phosphodiesterase 4       |
| 8019643 | DOC2B             | 1.0394717 | up | double C2-like domains, beta                             |
| 8120719 | CD109             | 1.0393662 | up |                                                          |
| 8157691 | LOC729012         | 1.0385793 | up | similar to Spindle and kinetochore-associated protein 2  |
| 7909455 | TRAF3IP3   LOC100 | 1.0385463 | up | TRAF3 interacting protein 3   hypothetical protein LOC   |
| 8068583 | KCNJ15            | 1.0384296 | up | potassium inwardly-rectifying channel, subfamily J, me   |
| 8155849 | ANXA1             | 1.0384043 | up | annexin A1                                               |
| 8015900 | TMEM101           | 1.0379584 | up | transmembrane protein 101                                |
| 8147697 | GRHL2             | 1.0377815 | up | grainyhead-like 2 (Drosophila)                           |
| 7942489 | DNAJB13           | 1.0372562 | up | DnaJ (Hsp40) related, subfamily B, member 13             |
| 8094533 | FLJ16686          | 1.0369713 | up |                                                          |
| 8175593 | IDS               | 1.0368915 | up | iduronate 2-sulfatase (Hunter syndrome)                  |
| 8056890 | CHN1              | 1.0365844 | up | chimerin (chimaerin) 1                                   |
| 8100210 | TXK               | 1.0357878 | up |                                                          |
| 8113358 | ST8SIA4           | 1.0353279 | up | ST8 alpha-N-acetyl-neuraminide alpha-2,8-sialyltransfe   |
| 8081826 | UPK1B             | 1.0352457 | up | uroplakin 1B                                             |
| 7979269 | GCH1              | 1.0348212 | up | GTP cyclohydrolase 1 (dopa-responsive dystonia)          |
| 8138392 | AGR3              | 1.0347868 | up | anterior gradient homolog 3 (Xenopus laevis)             |
| 7952453 | ROBO4             | 1.0347271 | up | roundabout homolog 4, magic roundabout (Drosophila       |
| 8150225 | RAB11FIP1         | 1.0345538 | up | RAB11 family interacting protein 1 (class I)             |
| 8011884 | NLRP1             | 1.0342722 | up | NLR family, pyrin domain containing 1                    |
| 8166671 | CXorf22           | 1.0342697 | up | chromosome X open reading frame 22                       |
| 8101126 | CXCL10            | 1.0338756 | up | chemokine (C-X-C motif) ligand 10                        |
| 8143610 | FLJ43692   LOC728 | 1.0337015 | up | ARHGEF5-like   similar to rho guanine nucleotide exch    |
| 8149590 | LOC100130604      | 1.0335405 | up |                                                          |

Supplemental Table 1c  
eMSC vs. eSF

|         |                |           |    |                                                                                   |
|---------|----------------|-----------|----|-----------------------------------------------------------------------------------|
| 8106354 | IQGAP2         | 1.0331552 | up | IQ motif containing GTPase activating protein 2                                   |
| 8140782 | ABCB1          | 1.0328927 | up | ATP-binding cassette, sub-family B (MDR/TAP), member 1                            |
| 8146000 | ADAM9          | 1.0325121 | up | ADAM metallopeptidase domain 9 (meltrin gamma)                                    |
| 8068383 | CLIC6          | 1.0321215 | up | chloride intracellular channel 6                                                  |
| 8025255 | STXBP2         | 1.032057  | up | syntaxin binding protein 2                                                        |
| 8100231 | TEC            | 1.0318996 | up | tec protein tyrosine kinase                                                       |
| 8019831 | CLUL1          | 1.0318247 | up | clusterin-like 1 (retinal)                                                        |
| 8121489 | AMD1           | 1.0313169 | up | adenosylmethionine decarboxylase 1                                                |
| 7909175 | SRGAP2         | 1.0311234 | up | SLIT-ROBO Rho GTPase activating protein 2                                         |
| 7971126 | STOML3         | 1.030765  | up | stomatin (EPB72)-like 3                                                           |
| 8160559 | DDX58          | 1.0307252 | up | DEAD (Asp-Glu-Ala-Asp) box polypeptide 58                                         |
| 8096602 | DAPP1          | 1.0300392 | up | dual adaptor of phosphotyrosine and 3-phosphoinositide                            |
| 8116418 | GFPT2          | 1.0292034 | up | glutamine-fructose-6-phosphate transaminase 2                                     |
| 7991034 | HOMER2         | 1.0289744 | up | homer homolog 2 (Drosophila)                                                      |
| 7956301 | LRP1           | 1.0286908 | up | low density lipoprotein-related protein 1 (alpha-2-macroglobulin receptor type 1) |
| 8068697 | MX2            | 1.0285662 | up | myxovirus (influenza virus) resistance 2 (mouse)                                  |
| 7932552 | LOC100128663 P | 1.0282307 | up | similar to PRO3077   hypothetical protein PRO3077                                 |
| 8071981 | CTA-221G9.4    | 1.0277193 | up | KIAA1671 protein                                                                  |
| 8015133 | KRT23          | 1.0260097 | up | keratin 23 (histone deacetylase inducible)                                        |
| 7917019 | C1orf173       | 1.0253135 | up | chromosome 1 open reading frame 173                                               |
| 8120783 | MYO6           | 1.0251409 | up | myosin VI                                                                         |
| 8115814 | SH3PXD2B       | 1.0239106 | up | SH3 and PX domains 2B                                                             |
| 8004255 | BCL6B          | 1.0236638 | up | B-cell CLL/lymphoma 6, member B (zinc finger protein)                             |
| 8048725 | MOGAT1         | 1.0234631 | up | monoacylglycerol O-acyltransferase 1                                              |
| 8126905 | CRISP3         | 1.0223426 | up | cysteine-rich secretory protein 3                                                 |
| 7974080 | MIA2           | 1.0223411 | up | melanoma inhibitory activity 2                                                    |
| 7906435 | DARC           | 1.020878  | up | Duffy blood group, chemokine receptor                                             |
| 8077270 | CHL1           | 1.0208536 | up | cell adhesion molecule with homology to L1CAM (close homolog of L1CAM)            |
| 7996954 | NFAT5          | 1.0208342 | up | nuclear factor of activated T-cells 5, tonicity-responsive                        |
| 7916629 | C1orf87        | 1.0208054 | up | chromosome 1 open reading frame 87                                                |
| 8100362 | LNX1           | 1.020599  | up | ligand of numb-protein X 1                                                        |
| 7902957 | ABHD7          | 1.020373  | up | abhydrolase domain containing 7                                                   |
| 8057377 | CCDC141 LOC285 | 1.0198556 | up | coiled-coil domain containing 141   hypothetical protein                          |

Supplemental Table 1c  
eMSC vs. eSF

|         |              |           |    |                                                           |
|---------|--------------|-----------|----|-----------------------------------------------------------|
| 8100026 | ATP8A1       | 1.019552  | up | ATPase, aminophospholipid transporter (APLT), class I,    |
| 7990757 | CTSH         | 1.0193846 | up | cathepsin H                                               |
| 8129497 | EPB41L2      | 1.0191549 | up | erythrocyte membrane protein band 4.1-like 2              |
| 8138922 | KBTBD2       | 1.0190897 | up | kelch repeat and BTB (POZ) domain containing 2            |
| 7903803 | AHCYL1       | 1.0187836 | up | S-adenosylhomocysteine hydrolase-like 1                   |
| 7966690 | TBX3         | 1.0185612 | up | T-box 3 (ulnar mammary syndrome)                          |
| 8099834 | TLR1         | 1.0183364 | up | toll-like receptor 1                                      |
| 8088315 | ASB14 DNAH12 | 1.0182977 | up | ankyrin repeat and SOCS box-containing 14   dynein, a     |
| 8066530 | SPINT3       | 1.0181276 | up | serine peptidase inhibitor, Kunitz type, 3                |
| 8150830 | LYPLA1       | 1.0176615 | up | lysophospholipase I                                       |
| 8094988 | FLJ21511     | 1.015811  | up |                                                           |
| 8094378 | PI4K2B       | 1.0156761 | up | phosphatidylinositol 4-kinase type 2 beta                 |
| 8166098 | RAB9A        | 1.0155095 | up |                                                           |
| 7930148 | SFXN2        | 1.0153419 | up | sideroflexin 2                                            |
| 8078971 | ENTPD3       | 1.0148103 | up | ectonucleoside triphosphate diphosphohydrolase 3          |
| 8004889 | WDR16        | 1.0146642 | up | WD repeat domain 16                                       |
| 7939197 | HIPK3        | 1.0141509 | up | homeodomain interacting protein kinase 3                  |
| 8073662 | PARVB        | 1.014054  | up | parvin, beta                                              |
| 8080863 | FLJ44379     | 1.0131038 | up | similar to S-100 protein, alpha chain                     |
| 8142554 | AASS         | 1.013102  | up | aminoadipate-semialdehyde synthase                        |
| 8127087 | GSTA3        | 1.0125462 | up | glutathione S-transferase A3                              |
| 7934898 | ANKRD22      | 1.0120213 | up | ankyrin repeat domain 22                                  |
| 7953924 | CLEC9A       | 1.011557  | up | C-type lectin domain family 9, member A                   |
| 8016841 | TMEM100      | 1.0115199 | up | transmembrane protein 100                                 |
| 8045539 | KYNU         | 1.0113052 | up | kynureninase (L-kynurenine hydrolase)                     |
| 7996772 | SLC7A6 TRPV6 | 1.0111395 | up | solute carrier family 7 (cationic amino acid transporter) |
| 8081890 | PLA1A        | 1.0108199 | up | phospholipase A1 member A                                 |
| 7935270 | BLNK         | 1.0104113 | up | B-cell linker                                             |
| 8112803 | LHFPL2       | 1.0102111 | up | lipoma HMGIC fusion partner-like 2                        |
| 8066513 | SDC4         | 1.0097705 | up | syndecan 4                                                |
| 7972055 | KCTD12       | 1.0097034 | up | potassium channel tetramerisation domain containing       |
| 8142424 | GPR85        | 1.0097008 | up | G protein-coupled receptor 85                             |
| 8103695 | MFAP3L       | 1.0096976 | up | microfibrillar-associated protein 3-like                  |

Supplemental Table 1c  
eMSC vs. eSF

|         |                |           |    |                                                            |
|---------|----------------|-----------|----|------------------------------------------------------------|
| 8114287 | SPOCK1         | 1.0090533 | up | sparc/osteonectin, cwcv and kazal-like domains proteo      |
| 8056222 | DPP4           | 1.0087478 | up | dipeptidyl-peptidase 4 (CD26, adenosine deaminase cc       |
| 8111019 | DNAH5          | 1.0083475 | up | dynein, axonemal, heavy chain 5                            |
| 7968872 | DNAJC15        | 1.0079752 | up | DnaJ (Hsp40) homolog, subfamily C, member 15               |
| 8156321 | SYK            | 1.0072895 | up | spleen tyrosine kinase                                     |
| 8138009 | RSPH10B LOC728 | 1.0072479 | up | radial spoke head 10 homolog B (Chlamydomonas)   ra        |
| 7970448 | GJB6           | 1.0069237 | up | gap junction protein, beta 6, 30kDa                        |
| 8162502 | FBP1           | 1.0069227 | up | fructose-1,6-bisphosphatase 1                              |
| 8096061 | C4orf22        | 1.0067843 | up | chromosome 4 open reading frame 22                         |
| 8137240 | GIMAP7         | 1.0065758 | up | GTPase, IMAP family member 7                               |
| 8120431 | PTP4A1         | 1.0064869 | up | protein tyrosine phosphatase type IVA, member 1            |
| 8008040 | LRRC46         | 1.0064229 | up | leucine rich repeat containing 46                          |
| 7950933 | NOX4           | 1.0061471 | up | NADPH oxidase 4                                            |
| 8101701 | PPM1K          | 1.005875  | up | protein phosphatase 1K (PP2C domain containing)            |
| 8100768 | UGT2B11 UGT2B: | 1.0057423 | up | UDP glucuronosyltransferase 2 family, polypeptide B11      |
| 8081343 | RG9MTD1        | 1.0053399 | up | RNA (guanine-9-) methyltransferase domain containi         |
| 8041745 | C2orf34        | 1.0049134 | up | chromosome 2 open reading frame 34                         |
| 7951686 | IL18           | 1.0045019 | up | interleukin 18 (interferon-gamma-inducing factor)          |
| 7946641 | GALNTL4        | 1.0044155 | up | UDP-N-acetyl-alpha-D-galactosamine:polypeptide N-ac        |
| 7902738 | CLCA4          | 1.0043348 | up | chloride channel, calcium activated, family member 4       |
| 8014591 | HNF1B          | 1.0039085 | up | HNF1 homeobox B                                            |
| 7905677 | CREB3L4        | 1.0030394 | up | cAMP responsive element binding protein 3-like 4           |
| 7904907 | BCL9           | 1.0028496 | up | B-cell CLL/lymphoma 9                                      |
| 8021301 | RAB27B         | 1.002617  | up |                                                            |
| 8043937 | C2orf29        | 1.0022006 | up | chromosome 2 open reading frame 29                         |
| 8129558 | OR2A4 OR2A7    | 1.0020308 | up | olfactory receptor, family 2, subfamily A, member 4   c    |
| 7971191 | SUGT1L1 LOC100 | 1.0019966 | up | SGT1, suppressor of G2 allele of SKP1 like 1 (S. cerevisi: |
| 8081277 | NIT2           | 1.0018733 | up | nitrilase family, member 2                                 |
| 8122865 | VIP            | 1.0010781 | up | vasoactive intestinal peptide                              |
| 8078933 | MYRIP          | 1.0010256 | up | myosin VIIA and Rab interacting protein                    |
| 8085914 | SLC4A7         | 1.0010011 | up | solute carrier family 4, sodium bicarbonate cotranspor     |
| 8123044 | TULP4          | 1.0009856 | up | tubby like protein 4                                       |
| 7907370 | DNM3           | 1.0001323 | up | dynamamin 3                                                |

Supplemental Table 1c  
eMSC vs. eSF

|         |                |            |      |                                                           |
|---------|----------------|------------|------|-----------------------------------------------------------|
| 8040249 | ATP6V1C2       | 1.0001032  | up   | ATPase, H+ transporting, lysosomal 42kDa, V1 subunit      |
| 8058591 | ACADL          | -1.00013   | down | acyl-Coenzyme A dehydrogenase, long chain                 |
| 8022666 | CHST9          | -1.0002419 | down | carbohydrate (N-acetylgalactosamine 4-0) sulfotransfe     |
| 8138857 | C7orf24        | -1.0002584 | down | chromosome 7 open reading frame 24                        |
| 8139057 | ELMO1          | -1.0006217 | down | engulfment and cell motility 1                            |
| 7901969 | ROR1           | -1.0012133 | down | receptor tyrosine kinase-like orphan receptor 1           |
| 8166690 | CXorf59        | -1.0012468 | down | chromosome X open reading frame 59                        |
| 8067554 | TCFL5          | -1.0013477 | down | transcription factor-like 5 (basic helix-loop-helix)      |
| 7929689 | MARVELD1       | -1.0013504 | down | MARVEL domain containing 1                                |
| 8038981 | ZNF611         | -1.0013705 | down | zinc finger protein 611                                   |
| 8054712 | IL1A           | -1.0013747 | down | interleukin 1, alpha                                      |
| 7993898 | VWA3A          | -1.0015701 | down | von Willebrand factor A domain containing 3A              |
| 7986383 | IGF1R          | -1.0024474 | down | insulin-like growth factor 1 receptor                     |
| 7955578 | GRASP          | -1.0026078 | down | GRP1 (general receptor for phosphoinositides 1)-assoc     |
| 8050719 | ITSN2          | -1.0028031 | down | intersectin 2                                             |
| 7897953 | SNORA59A SNOR  | -1.0031283 | down | small nucleolar RNA, H/ACA box 59A   small nucleolar      |
| 8143633 | OR2A7 OR2A4 LC | -1.0031483 | down | olfactory receptor, family 2, subfamily A, member 7   c   |
| 7929533 | CC2D2B LOC1001 | -1.0031614 | down | coiled-coil and C2 domain containing 2B   hypothetical    |
| 8005626 | SNORA59A SNOR  | -1.0031906 | down | small nucleolar RNA, H/ACA box 59A   small nucleolar      |
| 8131452 | RSPH10B LOC728 | -1.0039934 | down | radial spoke head 10 homolog B (Chlamydomonas)   ra       |
| 8081953 | GTF2E1         | -1.0043613 | down | general transcription factor IIE, polypeptide 1, alpha 5f |
| 7950906 | CTSC           | -1.0045052 | down | cathepsin C                                               |
| 7956826 | TBC1D30        | -1.0045785 | down | TBC1 domain family, member 30                             |
| 8135568 | MDFIC          | -1.0046062 | down | MyoD family inhibitor domain containing                   |
| 8095021 | SPATA18        | -1.0047929 | down | spermatogenesis associated 18 homolog (rat)               |
| 8088602 | MAGI1          | -1.004998  | down | membrane associated guanylate kinase, WW and PDZ i        |
| 8043835 | C2orf15 MRPL30 | -1.0054238 | down | chromosome 2 open reading frame 15   mitochondrial        |
| 8052721 | PPP3R1 WDR92   | -1.0054512 | down | protein phosphatase 3 (formerly 2B), regulatory subun     |
| 7909681 | PROX1          | -1.0055523 | down | prospero homeobox 1                                       |
| 8054766 | bA395L14.13    | -1.0057479 | down | acrosin-like protease                                     |
| 7953765 | FAM80B         | -1.0061193 | down | family with sequence similarity 80, member B              |
| 7959681 | DNAH10         | -1.0064877 | down | dynein, axonemal, heavy chain 10                          |
| 8138363 | SOSTDC1        | -1.0068835 | down | sclerostin domain containing 1                            |

Supplemental Table 1c  
eMSC vs. eSF

|         |              |            |      |                                                            |
|---------|--------------|------------|------|------------------------------------------------------------|
| 8112053 | CDC20B       | -1.0070349 | down | cell division cycle 20 homolog B ( <i>S. cerevisiae</i> )  |
| 8163202 | SVEP1        | -1.0073675 | down | sushi, von Willebrand factor type A, EGF and pentraxin     |
| 8165024 | C9orf116     | -1.0074778 | down | chromosome 9 open reading frame 116                        |
| 7922200 | SELP         | -1.0076823 | down | selectin P (granule membrane protein 140kDa, antigen       |
| 7907466 | DARS2        | -1.007809  | down | aspartyl-tRNA synthetase 2, mitochondrial                  |
| 8094361 | GBA3         | -1.007867  | down | glucosidase, beta, acid 3 (cytosolic)                      |
| 7929525 | LOC100127889 | -1.0081999 | down |                                                            |
| 7979378 | C14orf105    | -1.0088184 | down | chromosome 14 open reading frame 105                       |
| 8155754 | MAMDC2       | -1.0088408 | down | MAM domain containing 2                                    |
| 8111506 | CAPSL        | -1.0089089 | down | calcyphosine-like                                          |
| 7910706 | LGALS8       | -1.0089676 | down | lectin, galactoside-binding, soluble, 8 (galectin 8)       |
| 7899750 | C1orf90      | -1.0089889 | down | chromosome 1 open reading frame 90                         |
| 8009476 | MAP2K6       | -1.0090249 | down | mitogen-activated protein kinase kinase 6                  |
| 8092295 | CCDC39       | -1.0091653 | down | coiled-coil domain containing 39                           |
| 8096682 | FLJ20184     | -1.0092711 | down |                                                            |
| 8081081 | EPHA3        | -1.0095506 | down | EPH receptor A3                                            |
| 8055361 | YSK4         | -1.0095587 | down | yeast Sps1/Ste20-related kinase 4 ( <i>S. cerevisiae</i> ) |
| 8091600 | PLCH1        | -1.0096067 | down | phospholipase C, eta 1                                     |
| 8089835 | FSTL1        | -1.0099692 | down | follistatin-like 1                                         |
| 8022711 | DSC2         | -1.0102464 | down | desmocollin 2                                              |
| 8149097 | DEFB1        | -1.0105113 | down | defensin, beta 1                                           |
| 8162940 | ABCA1        | -1.0108343 | down | ATP-binding cassette, sub-family A (ABC1), member 1        |
| 8154491 | ADAMTSL1     | -1.0116081 | down | ADAMTS-like 1                                              |
| 8138941 | NT5C3        | -1.0123085 | down | 5'-nucleotidase, cytosolic III                             |
| 8139859 | GUSB         | -1.0123354 | down | glucuronidase, beta                                        |
| 7955078 | PFKM         | -1.01248   | down | phosphofructokinase, muscle                                |
| 8146986 | HNF4G        | -1.0132055 | down | hepatocyte nuclear factor 4, gamma                         |
| 8106660 | RASGRF2      | -1.0144144 | down | Ras protein-specific guanine nucleotide-releasing facto    |
| 8067955 | CXADR        | -1.0148294 | down | coxsackie virus and adenovirus receptor                    |
| 8146967 | CRISPLD1     | -1.0149018 | down | cysteine-rich secretory protein LCCL domain containing     |
| 7905339 | MGC29891     | -1.0157521 | down |                                                            |
| 8106986 | RHOBTB3      | -1.015867  | down | Rho-related BTB domain containing 3                        |
| 8083223 | C3orf58      | -1.0161877 | down | chromosome 3 open reading frame 58                         |



Supplemental Table 1c  
eMSC vs. eSF

|         |                |            |      |                                                                     |
|---------|----------------|------------|------|---------------------------------------------------------------------|
| 8140478 | tcag7.1314     | -1.0165133 | down | hypothetical protein LOC54103                                       |
| 8154892 | DNAI1          | -1.0166287 | down | dynein, axonemal, intermediate chain 1                              |
| 8060895 | RNU105B        | -1.0169473 | down | RNA, U105B small nucleolar                                          |
| 8084627 | C3orf65        | -1.0173047 | down | chromosome 3 open reading frame 65                                  |
| 8174654 | KLHL13         | -1.0173383 | down | kelch-like 13 (Drosophila)                                          |
| 8007493 | ARL4D          | -1.0184071 | down | ADP-ribosylation factor-like 4D                                     |
| 8091678 | VEPH1          | -1.0188342 | down | ventricular zone expressed PH domain homolog 1 (zeb                 |
| 8082012 | SLC15A2        | -1.0189905 | down | solute carrier family 15 (H <sup>+</sup> /peptide transporter), mem |
| 8122071 | ENPP3          | -1.0191855 | down | ectonucleotide pyrophosphatase/phosphodiesterase 3                  |
| 8058614 | LANCL1         | -1.0192007 | down | LanC lantibiotic synthetase component C-like 1 (bacter              |
| 8038029 | CARD8          | -1.0192918 | down | caspase recruitment domain family, member 8                         |
| 8109576 | THG1L          | -1.0199977 | down | tRNA-histidine guanylyltransferase 1-like ( <i>S. cerevisiae</i> )  |
| 8018774 | ST6GALNAC1     | -1.0201217 | down | ST6 (alpha-N-acetyl-neuraminyl-2,3-beta-galactosyl-1,3-             |
| 7930857 | EMX2           | -1.0201693 | down | empty spiracles homeobox 2                                          |
| 7925480 | FH             | -1.0207431 | down | fumarate hydratase                                                  |
| 7944869 | SPA17          | -1.0210458 | down | sperm autoantigenic protein 17                                      |
| 8042574 | OR7E37P LOC441 | -1.0210967 | down | olfactory receptor, family 7, subfamily E, member 37 p              |
| 7925492 | OPN3           | -1.0211071 | down | opsin 3                                                             |
| 7902495 | NEXN           | -1.0214268 | down | nexilin (F actin binding protein)                                   |
| 8095819 | STBD1 LOC10012 | -1.0226718 | down | starch binding domain 1   similar to genethonin 1                   |
| 8138824 | SCRN1          | -1.0228571 | down | secernin 1                                                          |
| 8151101 | MYBL1          | -1.0229319 | down | v-myb myeloblastosis viral oncogene homolog (avian)-l               |
| 7903227 | PALMD          | -1.0229554 | down | palmdelphin                                                         |
| 8107868 | CDC42SE2       | -1.0240885 | down | CDC42 small effector 2                                              |
| 8066536 | WFDC6 SPINLW1  | -1.0245063 | down | WAP four-disulfide core domain 6   serine peptidase ir              |
| 7947156 | MUC15          | -1.0246998 | down | mucin 15, cell surface associated                                   |
| 7969428 | UCHL3          | -1.0249577 | down | ubiquitin carboxyl-terminal esterase L3 (ubiquitin thiol            |
| 8174351 | NUP62CL        | -1.0250373 | down | nucleoporin 62kDa C-terminal like                                   |
| 8122561 | C6orf103       | -1.0250753 | down | chromosome 6 open reading frame 103                                 |
| 8129985 | PLAGL1         | -1.0254757 | down | pleiomorphic adenoma gene-like 1                                    |
| 8096617 | BANK1          | -1.025522  | down | B-cell scaffold protein with ankyrin repeats 1                      |
| 7980616 | PTPN21         | -1.025535  | down | protein tyrosine phosphatase, non-receptor type 21                  |
| 8143221 | ATP6V0A4       | -1.0258186 | down | ATPase, H <sup>+</sup> transporting, lysosomal V0 subunit a4        |

Supplemental Table 1c  
eMSC vs. eSF

|         |           |            |      |                                                            |
|---------|-----------|------------|------|------------------------------------------------------------|
| 8143772 | RARRES2   | -1.0260344 | down | retinoic acid receptor responder (tazarotene induced)      |
| 8038998 | ZNF468    | -1.0260525 | down | zinc finger protein 468                                    |
| 8160718 | PTENP1    | -1.0262097 | down | phosphatase and tensin homolog (mutated in multiple        |
| 8058091 | SATB2     | -1.0263716 | down | SATB homeobox 2                                            |
| 8120176 | C6orf141  | -1.0267967 | down | chromosome 6 open reading frame 141                        |
| 8083000 | FAIM      | -1.0268027 | down | Fas apoptotic inhibitory molecule                          |
| 8132725 | UPP1      | -1.0281829 | down | uridine phosphorylase 1                                    |
| 7973108 | LOC643332 | -1.0282829 | down | similar to Nonsecretory ribonuclease precursor (Ribon      |
| 8102792 | PCDH18    | -1.0287906 | down | protocadherin 18                                           |
| 8014891 | IKZF3     | -1.0296723 | down | IKAROS family zinc finger 3 (Aiolos)                       |
| 8104930 | SLC1A3    | -1.0307158 | down | solute carrier family 1 (glial high affinity glutamate tra |
| 8082066 | C3orf28   | -1.0312574 | down | chromosome 3 open reading frame 28                         |
| 7946275 | GVIN1     | -1.0313169 | down | GTPase, very large interferon inducible 1                  |
| 8088299 | DNHD2     | -1.0316312 | down | dynein heavy chain domain 2                                |
| 7949948 | C11orf24  | -1.032405  | down | chromosome 11 open reading frame 24                        |
| 8068202 | C21orf63  | -1.0325674 | down | chromosome 21 open reading frame 63                        |
| 8147057 | CHMP4C    | -1.0326015 | down | chromatin modifying protein 4C                             |
| 8131067 | GPR146    | -1.0341233 | down | G protein-coupled receptor 146                             |
| 7975772 | C14orf140 | -1.0349064 | down | chromosome 14 open reading frame 140                       |
| 8146839 | C8orf34   | -1.0358783 | down | chromosome 8 open reading frame 34                         |
| 7983512 | SQRDL     | -1.0359359 | down | sulfide quinone reductase-like (yeast)                     |
| 7957514 | PLEKHG7   | -1.0360098 | down | pleckstrin homology domain containing, family G (with      |
| 8081710 | SIDT1     | -1.0361625 | down | SID1 transmembrane family, member 1                        |
| 8023314 | CCDC11    | -1.0362233 | down | coiled-coil domain containing 11                           |
| 7979510 | SIX4      | -1.0368059 | down | SIX homeobox 4                                             |
| 8089519 | BTLA      | -1.036916  | down | B and T lymphocyte associated                              |
| 8095834 | SHROOM3   | -1.0372869 | down | shroom family member 3                                     |
| 8162039 | C9orf64   | -1.037398  | down | chromosome 9 open reading frame 64                         |
| 7997556 | LRRC50    | -1.0377117 | down | leucine rich repeat containing 50                          |
| 8138735 | HOXA5     | -1.0382973 | down | homeobox A5                                                |
| 8138553 | FAM126A   | -1.0384456 | down | family with sequence similarity 126, member A              |
| 7995825 | MT1F      | -1.0387037 | down | metallothionein 1F                                         |
| 7917338 | BCL10     | -1.0388604 | down | B-cell CLL/lymphoma 10                                     |

Supplemental Table 1c  
eMSC vs. eSF

|         |                |            |      |                                                        |
|---------|----------------|------------|------|--------------------------------------------------------|
| 7969640 | CLDN10         | -1.0389005 | down | claudin 10                                             |
| 8167973 | HEPH           | -1.0392019 | down | hephaestin                                             |
| 7942941 | CCDC81         | -1.0400605 | down | coiled-coil domain containing 81                       |
| 8124166 | MBOAT1         | -1.0401615 | down | membrane bound O-acyltransferase domain containing     |
| 7951593 | FLJ45803       | -1.0402682 | down |                                                        |
| 8113796 | FLJ44606       | -1.0410382 | down | hypothetical gene supported by AK126569                |
| 7971922 | PCDH9          | -1.0414957 | down | protocadherin 9                                        |
| 7997453 | PLCG2          | -1.0428466 | down | phospholipase C, gamma 2 (phosphatidylinositol-speci   |
| 8086451 | HIGD1A         | -1.0430238 | down | HIG1 domain family, member 1A                          |
| 8070603 | RSPH1          | -1.0431879 | down | radial spoke head 1 homolog (Chlamydomonas)            |
| 8129837 | IL20RA         | -1.0432395 | down | interleukin 20 receptor, alpha                         |
| 7955063 | TMEM106C       | -1.0435246 | down | transmembrane protein 106C                             |
| 8017133 | FAM33A         | -1.043526  | down | family with sequence similarity 33, member A           |
| 8106950 | FAM81B         | -1.0435752 | down | family with sequence similarity 81, member B           |
| 8156319 | GADD45G        | -1.0437489 | down | growth arrest and DNA-damage-inducible, gamma          |
| 8166289 | CDKL5          | -1.0439533 | down | cyclin-dependent kinase-like 5                         |
| 7964701 | GNS            | -1.0442463 | down | glucosamine (N-acetyl)-6-sulfatase (Sanfilippo disease |
| 8138157 | COL28A1        | -1.0445663 | down | collagen, type XXVIII, alpha 1                         |
| 7954196 | MGST1          | -1.0449699 | down | microsomal glutathione S-transferase 1                 |
| 8120279 | LRRC1          | -1.0449835 | down | leucine rich repeat containing 1                       |
| 8111941 | HMGCS1         | -1.0449913 | down | 3-hydroxy-3-methylglutaryl-Coenzyme A synthase 1 (sc   |
| 8118734 | ITPR3          | -1.0452603 | down | inositol 1,4,5-triphosphate receptor, type 3           |
| 8146921 | RDH10          | -1.0458012 | down | retinol dehydrogenase 10 (all-trans)                   |
| 8113130 | MCTP1          | -1.045978  | down | multiple C2 domains, transmembrane 1                   |
| 8171837 | KLHL15         | -1.0461723 | down | kelch-like 15 (Drosophila)                             |
| 7968787 | OR7E37P OR7E47 | -1.0461797 | down | olfactory receptor, family 7, subfamily E, member 37 p |
| 8146533 | FAM110B        | -1.0462166 | down | family with sequence similarity 110, member B          |
| 8123080 | SYTL3          | -1.0466263 | down | synaptotagmin-like 3                                   |
| 7970455 | CRYL1          | -1.0467303 | down | crystallin, lambda 1                                   |
| 8060765 | PRND           | -1.0469874 | down | prion protein 2 (dublet)                               |
| 8060997 | SPTLC3         | -1.0476453 | down | serine palmitoyltransferase, long chain base subunit 3 |
| 7985398 | FAM154B        | -1.0477467 | down | family with sequence similarity 154, member B          |
| 8022646 | KCTD1          | -1.0479712 | down | potassium channel tetramerisation domain containing    |

Supplemental Table 1c  
eMSC vs. eSF

|         |                 |            |      |                                                            |
|---------|-----------------|------------|------|------------------------------------------------------------|
| 8138145 | LOC441453       | -1.048197  | down | similar to olfactory receptor, family 7, subfamily A, me   |
| 7938683 | LOC441453       | -1.0482996 | down | similar to olfactory receptor, family 7, subfamily A, me   |
| 8046546 | HOXD8           | -1.0483087 | down | homeobox D8                                                |
| 8091422 | WWTR1           | -1.0486798 | down | WW domain containing transcription regulator 1             |
| 8169389 | PAK3            | -1.0493629 | down | p21 (CDKN1A)-activated kinase 3                            |
| 7984588 | THSD4           | -1.0494518 | down | thrombospondin, type I, domain containing 4                |
| 8020806 | RNF125          | -1.049808  | down | ring finger protein 125                                    |
| 8178220 | HLA-DPB1        | -1.0500492 | down | major histocompatibility complex, class II, DP beta 1      |
| 8021442 | ZNF532          | -1.0501653 | down | zinc finger protein 532                                    |
| 7990818 | BCL2A1          | -1.0503048 | down | BCL2-related protein A1                                    |
| 8084717 | ST6GAL1         | -1.0513071 | down | ST6 beta-galactosamide alpha-2,6-sialyltransferase 1       |
| 8045887 | OR7E37P         | -1.0513256 | down | olfactory receptor, family 7, subfamily E, member 37 p     |
| 8101828 | TSPAN5          | -1.0513916 | down | tetraspanin 5                                              |
| 7928471 | ADK             | -1.0515884 | down | adenosine kinase                                           |
| 7961365 | MANSC1          | -1.0519768 | down | MANSC domain containing 1                                  |
| 8081758 | GRAMD1C         | -1.0520198 | down | GRAM domain containing 1C                                  |
| 8054092 | TMEM131         | -1.0521728 | down | transmembrane protein 131                                  |
| 7954503 | MED21           | -1.0522525 | down | mediator complex subunit 21                                |
| 8057959 | PGAP1           | -1.0524437 | down | post-GPI attachment to proteins 1                          |
| 7964522 | CDK4            | -1.0526295 | down | cyclin-dependent kinase 4                                  |
| 7971241 | OR7E37P OR7E47  | -1.0526524 | down | olfactory receptor, family 7, subfamily E, member 37 p     |
| 8023267 | MYO5B           | -1.0527127 | down | myosin VB                                                  |
| 8091887 | ZBBX            | -1.0528412 | down | zinc finger, B-box domain containing                       |
| 7926638 | ARMC3           | -1.0531963 | down | armadillo repeat containing 3                              |
| 7922523 | LOC730167       | -1.0533574 | down | similar to protein tyrosine phosphatase 4a1                |
| 7969613 | GPC6            | -1.0535315 | down | glypican 6                                                 |
| 8124307 | CMAH            | -1.0536504 | down | cytidine monophosphate-N-acetylneuraminic acid hydri       |
| 8096675 | TET2            | -1.0539395 | down | tet oncogene family member 2                               |
| 8167930 | FAAH2           | -1.0543548 | down | fatty acid amide hydrolase 2                               |
| 7971950 | DACH1           | -1.0544446 | down | dachshund homolog 1 (Drosophila)                           |
| 8179595 | GABBR1          | -1.0545652 | down | gamma-aminobutyric acid (GABA) B receptor, 1               |
| 8126729 | CLIC5 LOC100131 | -1.0551881 | down | chloride intracellular channel 5   similar to chloride int |
| 8124654 | GABBR1          | -1.0554354 | down | gamma-aminobutyric acid (GABA) B receptor, 1               |

Supplemental Table 1c  
eMSC vs. eSF

|         |                 |            |      |                                                        |
|---------|-----------------|------------|------|--------------------------------------------------------|
| 7952036 | MPZL3           | -1.0557216 | down | myelin protein zero-like 3                             |
| 8022176 | LAMA1           | -1.0559951 | down | laminin, alpha 1                                       |
| 7900159 | DNALI1          | -1.0562676 | down | dynein, axonemal, light intermediate chain 1           |
| 8114920 | DPYSL3          | -1.0570856 | down | dihydropyrimidinase-like 3                             |
| 7948113 | OR7E5P          | -1.0574105 | down | olfactory receptor, family 7, subfamily E, member 5 ps |
| 7938951 | TMEM16E         | -1.0578711 | down | transmembrane protein 16E                              |
| 8085732 | EFHB            | -1.0583694 | down | EF-hand domain family, member B                        |
| 8107673 | GRAMD3          | -1.058901  | down | GRAM domain containing 3                               |
| 7976578 | AK7             | -1.0601479 | down | adenylate kinase 7                                     |
| 7951910 | BACE1           | -1.0602103 | down | beta-site APP-cleaving enzyme 1                        |
| 8174189 | TMSL8 MGC3990   | -1.0602231 | down | thymosin-like 8   thymosin beta15b                     |
| 8121015 | C6orf165 SLC35A | -1.0606174 | down | chromosome 6 open reading frame 165   solute carrier   |
| 8082244 | OR7E37P         | -1.0612491 | down | olfactory receptor, family 7, subfamily E, member 37 p |
| 8117225 | GMNN            | -1.0613973 | down | geminin, DNA replication inhibitor                     |
| 8044605 | LOC654433       | -1.0617566 | down |                                                        |
| 8100318 | SGCB            | -1.0618308 | down | sarcoglycan, beta (43kDa dystrophin-associated glycop  |
| 7944803 | LOH11CR2A       | -1.0618771 | down | loss of heterozygosity, 11, chromosomal region 2, gene |
| 8095705 | MTHFD2L         | -1.0622504 | down | methylenetetrahydrofolate dehydrogenase (NADP+ de      |
| 7981439 | BAG5            | -1.0622604 | down | BCL2-associated athanogene 5                           |
| 8178298 | GABBR1          | -1.062349  | down | gamma-aminobutyric acid (GABA) B receptor, 1           |
| 7932453 | NEBL            | -1.0626143 | down | nebulette                                              |
| 8091715 | LXN             | -1.0627117 | down | latexin                                                |
| 7951271 | MMP1            | -1.0631621 | down | matrix metalloproteinase 1 (interstitial collagenase)  |
| 7945873 | ZNF195          | -1.0633382 | down | zinc finger protein 195                                |
| 8088848 | PDZRN3          | -1.063548  | down | PDZ domain containing RING finger 3                    |
| 8120043 | RUNX2           | -1.0640297 | down | runt-related transcription factor 2                    |
| 8114300 | KLHL3           | -1.0657774 | down | kelch-like 3 (Drosophila)                              |
| 8035779 | LOC100128975    | -1.0664816 | down | similar to Zinc finger protein 626                     |
| 8086555 | LZTFL1          | -1.0666406 | down | leucine zipper transcription factor-like 1             |
| 8055096 | AMMECR1L        | -1.0676202 | down | AMME chromosomal region gene 1-like                    |
| 8102877 | CLGN            | -1.0676645 | down | calmegin                                               |
| 8045860 | PKP4            | -1.0677989 | down | plakophilin 4                                          |
| 8007745 | HEXIM1          | -1.0679959 | down | hexamethylene bis-acetamide inducible 1                |

Supplemental Table 1c  
eMSC vs. eSF

|         |                |            |      |                                                          |
|---------|----------------|------------|------|----------------------------------------------------------|
| 8172220 | NDP            | -1.0681095 | down | Norrie disease (pseudoglioma)                            |
| 8103877 | CLDN22         | -1.0681851 | down | claudin 22                                               |
| 8049044 | ARMC9          | -1.0685401 | down | armadillo repeat containing 9                            |
| 7971813 | THSD1          | -1.068889  | down | thrombospondin, type I, domain containing 1              |
| 8095697 | CXCL1          | -1.0690683 | down | chemokine (C-X-C motif) ligand 1 (melanoma growth st     |
| 8070584 | TMPRSS3        | -1.0692177 | down | transmembrane protease, serine 3                         |
| 8154512 | ADAMTSL1       | -1.06956   | down | ADAMTS-like 1                                            |
| 7984704 | NEO1           | -1.070422  | down | neogenin homolog 1 (chicken)                             |
| 7973875 | NPAS3          | -1.0707467 | down | neuronal PAS domain protein 3                            |
| 8013399 | ULK2           | -1.0708517 | down | unc-51-like kinase 2 (C. elegans)                        |
| 8119184 | RNF8           | -1.0711302 | down | ring finger protein 8                                    |
| 8109194 | SLC26A2        | -1.0714202 | down | solute carrier family 26 (sulfate transporter), member : |
| 7913787 | C1orf201       | -1.0714312 | down | chromosome 1 open reading frame 201                      |
| 7904211 | VANGL1         | -1.0715114 | down | vang-like 1 (van gogh, Drosophila)                       |
| 7933437 | PTPN20B PTPN2C | -1.072088  | down | protein tyrosine phosphatase, non-receptor type 20B      |
| 8084206 | B3GNT5         | -1.0724735 | down | UDP-GlcNAc:betaGal beta-1,3-N-acetylglucosaminyltra      |
| 8097435 | C4orf33        | -1.0725298 | down | chromosome 4 open reading frame 33                       |
| 7960919 | MFAP5          | -1.0738322 | down | microfibrillar associated protein 5                      |
| 8088322 | DNAH12L        | -1.0741805 | down | dynein, axonemal, heavy chain 12-like                    |
| 7964759 | GRIP1          | -1.0744891 | down | glutamate receptor interacting protein 1                 |
| 8101757 | GPRIN3         | -1.0745243 | down | GPRIN family member 3                                    |
| 7964927 | TSPAN8         | -1.0751117 | down | tetraspanin 8                                            |
| 8044212 | SULT1C2        | -1.0752403 | down | sulfotransferase family, cytosolic, 1C, member 2         |
| 7899160 | CD52           | -1.0761867 | down |                                                          |
| 8126750 | ENPP5          | -1.0762494 | down | ectonucleotide pyrophosphatase/phosphodiesterase 5       |
| 8023401 | CCDC68         | -1.0764444 | down | coiled-coil domain containing 68                         |
| 8096091 | THAP9          | -1.0767968 | down | THAP domain containing 9                                 |
| 8130408 | PIP3-E         | -1.0769542 | down |                                                          |
| 8166104 | OFD1           | -1.0769709 | down | oral-facial-digital syndrome 1                           |
| 8131881 | C7orf46        | -1.0769824 | down | chromosome 7 open reading frame 46                       |
| 8027268 | ZNF66          | -1.0776172 | down | zinc finger protein 66                                   |
| 8063382 | SNAI1          | -1.0776381 | down | snail homolog 1 (Drosophila)                             |
| 8097920 | LRAT           | -1.0786926 | down | lecithin retinol acyltransferase (phosphatidylcholine--r |

Supplemental Table 1c  
eMSC vs. eSF

|         |             |            |      |                                                         |
|---------|-------------|------------|------|---------------------------------------------------------|
| 8042993 | CTNNA2      | -1.0791566 | down | catenin (cadherin-associated protein), alpha 2          |
| 7989501 | CA12        | -1.0803982 | down | carbonic anhydrase XII                                  |
| 7988859 | GNB5        | -1.0812962 | down | guanine nucleotide binding protein (G protein), beta 5  |
| 8171823 | APOO        | -1.0818316 | down | apolipoprotein O                                        |
| 8137526 | INSIG1      | -1.0825324 | down | insulin induced gene 1                                  |
| 8118594 | HLA-DPB1    | -1.0826815 | down | major histocompatibility complex, class II, DP beta 1   |
| 8138602 | DFNA5       | -1.0831991 | down | deafness, autosomal dominant 5                          |
| 7938816 | ZDHHC13     | -1.0835192 | down | zinc finger, DHHC-type containing 13                    |
| 8127549 | SLC17A5     | -1.0835851 | down | solute carrier family 17 (anion/sugar transporter), men |
| 7995681 | MMP2        | -1.0840188 | down | matrix metalloproteinase 2 (gelatinase A, 72kDa gelatin |
| 8059279 | EPHA4       | -1.0844804 | down | EPH receptor A4                                         |
| 8023843 | FBXO15      | -1.0847007 | down | F-box protein 15                                        |
| 7922408 | SNORD78     | -1.0849386 | down | small nucleolar RNA, C/D box 78                         |
| 7925452 | GREM2       | -1.085221  | down | gremlin 2, cysteine knot superfamily, homolog (Xenopi   |
| 8096425 | MGC48628    | -1.0854485 | down | similar to KIAA1680 protein                             |
| 8179351 | CFB         | -1.0859064 | down | complement factor B                                     |
| 7900635 | hCG_23177   | -1.086086  | down | hCG23177                                                |
| 7947322 | DCDC1 DCDC5 | -1.0862188 | down | doublecortin domain containing 1   doublecortin dom:    |
| 7902290 | CTH         | -1.0870447 | down | cystathionase (cystathionine gamma-lyase)               |
| 7904693 | FLJ21272    | -1.0870904 | down |                                                         |
| 8039013 | ZNF321      | -1.0877273 | down | zinc finger protein 321                                 |
| 8162059 | SLC28A3     | -1.0878744 | down | solute carrier family 28 (sodium-coupled nucleoside tr: |
| 8147516 | MATN2       | -1.0886853 | down | matrilin 2                                              |
| 7898957 | RCAN3       | -1.0887917 | down | RCAN family member 3                                    |
| 8108683 | PCDHB2      | -1.0892677 | down | protocadherin beta 2                                    |
| 8098500 | CDKN2AIP    | -1.0897305 | down | CDKN2A interacting protein                              |
| 7933821 | RHOBTB1     | -1.0903645 | down | Rho-related BTB domain containing 1                     |
| 7975799 | FLVCR2      | -1.0904077 | down | feline leukemia virus subgroup C cellular receptor fami |
| 7982256 | GOLGA9P     | -1.0905501 | down | golgi autoantigen, golgin subfamily a, 9 pseudogene     |
| 7965918 | NT5DC3      | -1.0914805 | down | 5'-nucleotidase domain containing 3                     |
| 7931951 | SFMBT2      | -1.0928022 | down | Scm-like with four mbt domains 2                        |
| 7997374 | DYNLRB2     | -1.0930169 | down | dynein, light chain, roadblock-type 2                   |
| 7983734 | TMOD2       | -1.0934755 | down | tropomodulin 2 (neuronal)                               |

Supplemental Table 1c  
eMSC vs. eSF

|         |               |            |      |                                                         |
|---------|---------------|------------|------|---------------------------------------------------------|
| 8039607 | PEG3 ZIM2     | -1.0941185 | down | paternally expressed 3   zinc finger, imprinted 2       |
| 7937696 | LOC338651     | -1.0945722 | down |                                                         |
| 8155747 | C9orf135      | -1.0960016 | down | chromosome 9 open reading frame 135                     |
| 7971757 | NEK5          | -1.0962723 | down | NIMA (never in mitosis gene a)-related kinase 5         |
| 7969533 | SLAIN1        | -1.0969527 | down | SLAIN motif family, member 1                            |
| 8033257 | C3            | -1.097333  | down | complement component 3                                  |
| 8071758 | MMP11         | -1.0975187 | down | matrix metalloproteinase 11 (stromelysin 3)             |
| 7971246 | KIAA0564      | -1.0977052 | down |                                                         |
| 7979158 | TXNDC16       | -1.0979933 | down | thioredoxin domain containing 16                        |
| 7932118 | C10orf30      | -1.0984799 | down | chromosome 10 open reading frame 30                     |
| 7927146 | CSGALNACT2    | -1.099558  | down | chondroitin sulfate N-acetylgalactosaminyltransferase   |
| 8094874 | LOC402175     | -1.0998911 | down | hypothetical gene supported by AF044957; NM_00454       |
| 7956878 | IRAK3         | -1.1007115 | down | interleukin-1 receptor-associated kinase 3              |
| 8112302 | DKFZP686E2158 | -1.1008435 | down | hypothetical protein LOC643155                          |
| 8117034 | GMPR          | -1.1009513 | down | guanosine monophosphate reductase                       |
| 8179519 | HLA-DPB1      | -1.1013795 | down | major histocompatibility complex, class II, DP beta 1   |
| 8020090 | TWSG1         | -1.1018523 | down | twisted gastrulation homolog 1 (Drosophila)             |
| 8020702 | TAF4B         | -1.102326  | down | TAF4b RNA polymerase II, TATA box binding protein (T    |
| 8137232 | GIMAP8        | -1.1024783 | down | GTPase, IMAP family member 8                            |
| 8157890 | PBX3          | -1.1046064 | down | pre-B-cell leukemia homeobox 3                          |
| 7970716 | LNX2          | -1.1051689 | down | ligand of numb-protein X 2                              |
| 8058670 | IKZF2         | -1.1053393 | down | IKAROS family zinc finger 2 (Helios)                    |
| 7898623 | UBXD3         | -1.105465  | down | UBX domain containing 3                                 |
| 8056963 | LOC100129455  | -1.1056858 | down |                                                         |
| 8109629 | FABP6         | -1.1057327 | down | fatty acid binding protein 6, ileal (gastrotropin)      |
| 8055702 | NMI           | -1.1059291 | down | N-myc (and STAT) interactor                             |
| 8094936 | LOC280665     | -1.105994  | down | putative anti-CNG alpha 1 cation channel translation pi |
| 8089026 | STX19         | -1.1061023 | down | syntaxin 19                                             |
| 8171624 | GPR64         | -1.1063848 | down | G protein-coupled receptor 64                           |
| 8052940 | PAIP2B        | -1.1079509 | down | poly(A) binding protein interacting protein 2B          |
| 8178115 | CFB           | -1.1087309 | down | complement factor B                                     |
| 8097903 | TLR2          | -1.1089385 | down | toll-like receptor 2                                    |
| 8144880 | SH2D4A        | -1.1096482 | down | SH2 domain containing 4A                                |



Supplemental Table 1c  
eMSC vs. eSF

|         |                |            |      |                                                                  |
|---------|----------------|------------|------|------------------------------------------------------------------|
| 8151824 | RAD54B LOC1001 | -1.1098839 | down | RAD54 homolog B ( <i>S. cerevisiae</i> )   similar to fibrinogen |
| 8118345 | CFB            | -1.1100311 | down | complement factor B                                              |
| 8120679 | DDX43          | -1.1102316 | down | DEAD (Asp-Glu-Ala-Asp) box polypeptide 43                        |
| 8121319 | SOBP           | -1.1102464 | down | sine oculis binding protein homolog ( <i>Drosophila</i> )        |
| 8074237 | CECR1          | -1.1104544 | down | cat eye syndrome chromosome region, candidate 1                  |
| 8120335 | FAM83B         | -1.110514  | down | family with sequence similarity 83, member B                     |
| 8040655 | SELI           | -1.1106778 | down | selenoprotein I                                                  |
| 8135218 | LRRC17         | -1.1112472 | down | leucine rich repeat containing 17                                |
| 8097017 | UGT8           | -1.1113608 | down | UDP glycosyltransferase 8 (UDP-galactose ceramide ga             |
| 8042270 | UGP2           | -1.1121591 | down | UDP-glucose pyrophosphorylase 2                                  |
| 8005289 | LRRC48         | -1.112809  | down | leucine rich repeat containing 48                                |
| 8068713 | MX1            | -1.113094  | down | myxovirus (influenza virus) resistance 1, interferon-ind         |
| 8038993 | ZNF28          | -1.1131183 | down | zinc finger protein 28                                           |
| 8150978 | CA8            | -1.1135957 | down | carbonic anhydrase VIII                                          |
| 7918694 | BCL2L15        | -1.1138973 | down | BCL2-like 15                                                     |
| 7901479 | ZYG11B         | -1.1139474 | down | zyg-11 homolog B ( <i>C. elegans</i> )                           |
| 8122336 | C6orf115       | -1.1141967 | down | chromosome 6 open reading frame 115                              |
| 7933772 | ANK3           | -1.1146816 | down | ankyrin 3, node of Ranvier (ankyrin G)                           |
| 7938989 | GAS2           | -1.1155139 | down | growth arrest-specific 2                                         |
| 8097449 | PCDH10         | -1.115547  | down | protocadherin 10                                                 |
| 8047596 | ALS2CR16       | -1.1159189 | down | amyotrophic lateral sclerosis 2 (juvenile) chromosome            |
| 8057056 | TTN            | -1.116555  | down | titin                                                            |
| 8121525 | KIAA1919       | -1.1166409 | down |                                                                  |
| 8064539 | CPXM1          | -1.1166543 | down | carboxypeptidase X (M14 family), member 1                        |
| 8096224 | AFF1           | -1.116682  | down | AF4/FMR2 family, member 1                                        |
| 7981460 | PPP1R13B       | -1.1168792 | down | protein phosphatase 1, regulatory (inhibitor) subunit 1          |
| 7971015 | SMAD9          | -1.1174029 | down | SMAD family member 9                                             |
| 8046530 | HOXD11         | -1.1175549 | down | homeobox D11                                                     |
| 8167835 | TRO            | -1.1175933 | down | trophinin                                                        |
| 7932390 | TRDMT1         | -1.1184037 | down | tRNA aspartic acid methyltransferase 1                           |
| 8166442 | FAM3C          | -1.1195375 | down | family with sequence similarity 3, member C                      |
| 8108435 | UBE2D2         | -1.1198034 | down | ubiquitin-conjugating enzyme E2D 2 (UBC4/5 homolog               |
| 7950042 | SHANK2         | -1.1199176 | down | SH3 and multiple ankyrin repeat domains 2                        |

Supplemental Table 1c  
eMSC vs. eSF

|         |                |            |      |                                                       |
|---------|----------------|------------|------|-------------------------------------------------------|
| 7966321 | GPN3           | -1.1203636 | down | GPN-loop GTPase 3                                     |
| 7972487 | DOCK9          | -1.1206328 | down | dedicator of cytokinesis 9                            |
| 8090277 | OSBPL11        | -1.121583  | down | oxysterol binding protein-like 11                     |
| 7971296 | EPSTI1         | -1.121633  | down | epithelial stromal interaction 1 (breast)             |
| 8067157 | CBLN4          | -1.1220361 | down | cerebellin 4 precursor                                |
| 8060850 | BMP2           | -1.1224185 | down | bone morphogenetic protein 2                          |
| 8042439 | ANTXR1         | -1.1225536 | down | anthrax toxin receptor 1                              |
| 7990879 | EFTUD1         | -1.1226315 | down | elongation factor Tu GTP binding domain containing 1  |
| 8047062 | MGC13057       | -1.1228439 | down |                                                       |
| 7919800 | CTSS           | -1.1236966 | down | cathepsin S                                           |
| 8144669 | FDFT1          | -1.124283  | down | farnesyl-diphosphate farnesyltransferase 1            |
| 8004133 | RPAIN          | -1.1248206 | down | RPA interacting protein                               |
| 8102482 | SEC24D         | -1.1251062 | down | SEC24 related gene family, member D (S. cerevisiae)   |
| 7926239 | OPTN           | -1.1253217 | down | optineurin                                            |
| 7973826 | NUBPL          | -1.1253856 | down | nucleotide binding protein-like                       |
| 8077513 | THUMPD3        | -1.1254967 | down | THUMP domain containing 3                             |
| 8068100 | C21orf109      | -1.1255258 | down | chromosome 21 open reading frame 109                  |
| 8101992 | SLC39A8        | -1.127367  | down | solute carrier family 39 (zinc transporter), member 8 |
| 8083749 | PPM1L          | -1.1275471 | down | protein phosphatase 1 (formerly 2C)-like              |
| 7903753 | GSTM2          | -1.1276201 | down | glutathione S-transferase M2 (muscle)                 |
| 8130768 | RNASET2 LOC100 | -1.1289937 | down | ribonuclease T2   hypothetical protein LOC100131869   |
| 8039025 | ZNF702         | -1.1290565 | down | zinc finger protein 702                               |
| 8143601 | CTAGE6 CTAGE4  | -1.1291813 | down | CTAGE family, member 6   CTAGE family, member 4   :   |
| 8066074 | DSN1           | -1.1301204 | down |                                                       |
| 8172158 | CASK           | -1.1303567 | down | calcium/calmodulin-dependent serine protein kinase (l |
| 8083523 | GMPS           | -1.1306792 | down | guanine monphosphate synthetase                       |
| 8136936 | CTAGE6 CTAGE4  | -1.1314765 | down | CTAGE family, member 6   CTAGE family, member 4   :   |
| 8143766 | ARP11          | -1.1316186 | down | actin-related Arp11                                   |
| 8086517 | CDCP1          | -1.1328576 | down | CUB domain containing protein 1                       |
| 8081903 | C3orf15        | -1.1338015 | down | chromosome 3 open reading frame 15                    |
| 7903144 | SLC44A3        | -1.1340921 | down | solute carrier family 44, member 3                    |
| 8129363 | HDDC2          | -1.1341311 | down | HD domain containing 2                                |
| 7904314 | TTF2           | -1.1345798 | down | transcription termination factor, RNA polymerase II   |

Supplemental Table 1c  
eMSC vs. eSF

|         |                  |            |      |                                                         |
|---------|------------------|------------|------|---------------------------------------------------------|
| 8030950 | ZNF701           | -1.1353216 | down | zinc finger protein 701                                 |
| 8122265 | TNFAIP3          | -1.1354636 | down | tumor necrosis factor, alpha-induced protein 3          |
| 8163063 | CTNNAL1          | -1.1355649 | down | catenin (cadherin-associated protein), alpha-like 1     |
| 8021376 | NEDD4L           | -1.1357765 | down | neural precursor cell expressed, developmentally down   |
| 8027260 | ZNF486           | -1.1359681 | down | zinc finger protein 486                                 |
| 8103226 | TMEM154          | -1.1361796 | down | transmembrane protein 154                               |
| 8124498 | ZNF204           | -1.1367533 | down | zinc finger protein 204 (pseudogene)                    |
| 8103260 | DCHS2            | -1.1371074 | down | dachsous 2 (Drosophila)                                 |
| 8121569 | FLJ34503         | -1.137347  | down |                                                         |
| 7928534 | C10orf11         | -1.1386204 | down | chromosome 10 open reading frame 11                     |
| 8108753 | PCDHB15          | -1.1387036 | down | protocadherin beta 15                                   |
| 8070557 | ZNF295           | -1.1390811 | down | zinc finger protein 295                                 |
| 8138930 | RP9P             | -1.1392795 | down | retinitis pigmentosa 9 pseudogene                       |
| 7909586 | PPP2R5A          | -1.1399322 | down | protein phosphatase 2, regulatory subunit B', alpha iso |
| 8092905 | LSG1             | -1.1402198 | down | large subunit GTPase 1 homolog (S. cerevisiae)          |
| 7961514 | MGP              | -1.1402798 | down | matrix Gla protein                                      |
| 7901765 | HOOK1            | -1.1403403 | down | hook homolog 1 (Drosophila)                             |
| 7947282 | DCDC5            | -1.140869  | down | doublecortin domain containing 5                        |
| 8096669 | TET2             | -1.1416711 | down | tet oncogene family member 2                            |
| 8089596 | WDR52            | -1.1417631 | down | WD repeat domain 52                                     |
| 8103011 | OTUD4            | -1.141816  | down | OTU domain containing 4                                 |
| 7931754 | IDI1             | -1.1418918 | down | isopentenyl-diphosphate delta isomerase 1               |
| 8004957 | DNAH9            | -1.1424085 | down | dynein, axonemal, heavy chain 9                         |
| 7930498 | ACSL5            | -1.1427876 | down | acyl-CoA synthetase long-chain family member 5          |
| 8085164 | SRGAP3           | -1.1429402 | down | SLIT-ROBO Rho GTPase activating protein 3               |
| 8039010 | ZNF765   LOC3885 | -1.143221  | down | zinc finger protein 765   similar to hCG1778601         |
| 8067295 | SLMO2            | -1.14472   | down | slowmo homolog 2 (Drosophila)                           |
| 7983828 | TEX9             | -1.1448464 | down | testis expressed 9                                      |
| 8171034 | SPRY3            | -1.1455674 | down | sprouty homolog 3 (Drosophila)                          |
| 8075182 | XBP1             | -1.1455684 | down | X-box binding protein 1                                 |
| 8176955 | SPRY3            | -1.1460086 | down | sprouty homolog 3 (Drosophila)                          |
| 7959330 | WDR66            | -1.1462952 | down | WD repeat domain 66                                     |
| 7932826 | KIAA1462         | -1.146384  | down |                                                         |

Supplemental Table 1c  
eMSC vs. eSF

|         |                  |            |      |                                                              |
|---------|------------------|------------|------|--------------------------------------------------------------|
| 8146794 | DEPDC2           | -1.1467935 | down | DEP domain containing 2                                      |
| 8100251 | FRYL             | -1.1473879 | down | FRY-like                                                     |
| 8168873 | LOC653354        | -1.1482589 | down |                                                              |
| 8097098 | USP53            | -1.1485502 | down | ubiquitin specific peptidase 53                              |
| 8099897 | UGDH             | -1.1496384 | down | UDP-glucose dehydrogenase                                    |
| 7903972 | ATP5F1           | -1.1502457 | down | ATP synthase, H+ transporting, mitochondrial F0 comp         |
| 8149248 | LRLE1 LOC100127  | -1.1511363 | down | liver-related low express protein 1   similar to liver-rel:  |
| 8151296 | LACTB2           | -1.151432  | down | lactamase, beta 2                                            |
| 8017843 | SLC16A6          | -1.1515119 | down | solute carrier family 16, member 6 (monocarboxylic ac        |
| 8142540 | FAM3C            | -1.151614  | down | family with sequence similarity 3, member C                  |
| 7909142 | LOC100130123 N   | -1.1517179 | down | PRO2870   nuclear casein kinase and cyclin-dependent         |
| 8005809 | LGALS9           | -1.1530489 | down | lectin, galactoside-binding, soluble, 9 (galectin 9)         |
| 8006531 | SLFN5            | -1.1530583 | down | schlafen family member 5                                     |
| 7956989 | MDM2             | -1.1550908 | down | Mdm2 p53 binding protein homolog (mouse)                     |
| 8083090 | ZBTB38           | -1.1560075 | down | zinc finger and BTB domain containing 38                     |
| 8145454 | BNIP3L LOC44025  | -1.1561273 | down | BCL2/adenovirus E1B 19kDa interacting protein 3-like         |
| 7989055 | DYX1C1           | -1.1565491 | down | dyslexia susceptibility 1 candidate 1                        |
| 7989365 | RORA             | -1.1569977 | down | RAR-related orphan receptor A                                |
| 8128788 | FLJ42177 C6orf15 | -1.1570317 | down | FLJ42177 protein   chromosome 6 open reading frame           |
| 8100292 | FRYL             | -1.1570519 | down | FRY-like                                                     |
| 7961829 | BCAT1            | -1.15725   | down | branched chain aminotransferase 1, cytosolic                 |
| 8134351 | PPP1R9A          | -1.1580552 | down | protein phosphatase 1, regulatory (inhibitor) subunit 9      |
| 7912145 | TNFRSF9          | -1.1587076 | down | tumor necrosis factor receptor superfamily, member 9         |
| 8101376 | SEC31A           | -1.1589911 | down | SEC31 homolog A ( <i>S. cerevisiae</i> )                     |
| 8117081 | AOX1             | -1.1600474 | down | amine oxidase (flavin containing) domain 1                   |
| 8056113 | LY75             | -1.1608129 | down | lymphocyte antigen 75                                        |
| 8107920 | SLC22A5          | -1.1609883 | down | solute carrier family 22 (organic cation/carnitine transp    |
| 7965436 | EEA1             | -1.1614513 | down | early endosome antigen 1                                     |
| 8124134 | TPMT             | -1.1617308 | down | thiopurine S-methyltransferase                               |
| 8166049 | PRPS2            | -1.162351  | down | phosphoribosyl pyrophosphate synthetase 2                    |
| 8049969 | SH3YL1           | -1.1625749 | down | SH3 domain containing, Ysc84-like 1 ( <i>S. cerevisiae</i> ) |
| 7932326 | CUBN             | -1.1637818 | down | cubilin (intrinsic factor-cobalamin receptor)                |
| 7927681 | BICC1            | -1.1638479 | down | bicaudal C homolog 1 ( <i>Drosophila</i> )                   |

Supplemental Table 1c  
eMSC vs. eSF

|         |                |            |      |                                                                       |
|---------|----------------|------------|------|-----------------------------------------------------------------------|
| 8109490 | SGCD           | -1.1644528 | down | sarcoglycan, delta (35kDa dystrophin-associated glycoprotein)         |
| 8096361 | HERC5          | -1.165186  | down | hect domain and RLD 5                                                 |
| 7931081 | PLEKHA1        | -1.1655461 | down | pleckstrin homology domain containing, family A (phosphotyrosine)     |
| 8147777 | CTHRC1         | -1.1660995 | down | collagen triple helix repeat containing 1                             |
| 8108720 | PCDHB9         | -1.1668214 | down | protocadherin beta 9                                                  |
| 8103106 | LRBA           | -1.1670675 | down | LPS-responsive vesicle trafficking, beach and anchor co-receptor      |
| 8106068 | MCCC2          | -1.1671271 | down | methylcrotonoyl-Coenzyme A carboxylase 2 (beta)                       |
| 8138277 | FLJ14712       | -1.1672814 | down |                                                                       |
| 8027354 | LOC388524      | -1.1673906 | down | ribosomal protein SA pseudogene                                       |
| 7925257 | LYST           | -1.167464  | down | lysosomal trafficking regulator                                       |
| 8044127 | C2orf49        | -1.1682826 | down | chromosome 2 open reading frame 49                                    |
| 8133770 | CCDC146        | -1.1685597 | down | coiled-coil domain containing 146                                     |
| 8177601 | MCCC2          | -1.1687944 | down | methylcrotonoyl-Coenzyme A carboxylase 2 (beta)                       |
| 7989968 | CALML4         | -1.1691601 | down | calmodulin-like 4                                                     |
| 8130211 | SYNE1 C6orf98  | -1.1692365 | down | spectrin repeat containing, nuclear envelope 1   chromatin            |
| 8062211 | BXDC1          | -1.1693137 | down | chromatin domain containing 1                                         |
| 7906900 | DDR2           | -1.1695105 | down | discoidin domain receptor tyrosine kinase 2                           |
| 8177674 | GTF2H2 DKFZP68 | -1.1696057 | down | general transcription factor IIH, polypeptide 2, 44kDa   DNA          |
| 8043055 | DNAH6          | -1.1696573 | down | dynein, axonemal, heavy chain 6                                       |
| 8047069 | INPP1          | -1.1700089 | down | inositol polyphosphate-1-phosphatase                                  |
| 8108716 | PCDHB16        | -1.1702044 | down | protocadherin beta 16                                                 |
| 8063410 | PARD6B         | -1.1710625 | down | par-6 partitioning defective 6 homolog beta (C. elegans)              |
| 8117476 | BTN3A3         | -1.1715094 | down | butyrophilin, subfamily 3, member A3                                  |
| 8156770 | GALNT12        | -1.1718053 | down | UDP-N-acetyl-alpha-D-galactosamine:polypeptide N-acetyltransferase 12 |
| 8167887 | MAGEH1         | -1.1722531 | down | melanoma antigen family H, 1                                          |
| 8103951 | ACSL1          | -1.1727353 | down | acyl-CoA synthetase long-chain family member 1                        |
| 8083429 | MBNL1          | -1.1733122 | down | muscleblind-like (Drosophila)                                         |
| 8044391 | MERTK          | -1.175054  | down | c-met proto-oncogene tyrosine kinase                                  |
| 7988789 | DMXL2          | -1.1758538 | down | Dmx-like 2                                                            |
| 8056327 | GRB14          | -1.1760314 | down | growth factor receptor-bound protein 14                               |
| 8166469 | SAT1           | -1.1771837 | down | spermidine/spermine N1-acetyltransferase 1                            |
| 8115196 | ZNF300         | -1.1777184 | down | zinc finger protein 300                                               |
| 8088919 | ROBO1          | -1.1789379 | down | roundabout, axon guidance receptor, homolog 1 (Drosophila)            |

Supplemental Table 1c  
eMSC vs. eSF

|         |                      |            |      |                                                                          |
|---------|----------------------|------------|------|--------------------------------------------------------------------------|
| 7909494 | SYT14                | -1.179798  | down | synaptotagmin XIV                                                        |
| 7943413 | BIRC3                | -1.1798909 | down | baculoviral IAP repeat-containing 3                                      |
| 8093053 | TFRC                 | -1.1799355 | down | transferrin receptor (p90, CD71)                                         |
| 7953518 | LOC171220            | -1.180178  | down | destrin-2 pseudogene                                                     |
| 8002969 | MAF                  | -1.1809053 | down | v-maf musculoaponeurotic fibrosarcoma oncogene homologue 1               |
| 8070398 | LCA5L                | -1.1809385 | down | Leber congenital amaurosis 5-like                                        |
| 8089627 | CCDC52               | -1.181592  | down | coiled-coil domain containing 52                                         |
| 8097670 | MMAA                 | -1.1820676 | down | methylmalonic aciduria (cobalamin deficiency) cblA type 1                |
| 8097657 | SMAD1                | -1.1830637 | down | SMAD family member 1                                                     |
| 8121622 | RSHL3                | -1.1830791 | down | radial spokehead-like 3                                                  |
| 7953520 | LRRC23               | -1.183868  | down | leucine rich repeat containing 23                                        |
| 8094169 | CPEB2                | -1.1840197 | down | cytoplasmic polyadenylation element binding protein 2                    |
| 8145586 | ELP3                 | -1.1844295 | down | elongation protein 3 homolog ( <i>S. cerevisiae</i> )                    |
| 8051785 | KCNG3                | -1.1854877 | down | potassium voltage-gated channel, subfamily G, member 3                   |
| 8101723 | NAP1L5               | -1.185703  | down | nucleosome assembly protein 1-like 5                                     |
| 8126135 | GLO1                 | -1.186082  | down | glyoxalase I                                                             |
| 8106280 | HMGCR                | -1.1881014 | down | 3-hydroxy-3-methylglutaryl-Coenzyme A reductase                          |
| 7977674 | SUPT16H              | -1.1887548 | down | suppressor of Ty 16 homolog ( <i>S. cerevisiae</i> )                     |
| 8039017 | ZNF816A ZNF321       | -1.1887835 | down | zinc finger protein 816A   zinc finger protein 321                       |
| 8074969 | DDT                  | -1.188808  | down | D-dopachrome tautomerase                                                 |
| 8093258 | IQCG                 | -1.1891735 | down | IQ motif containing G                                                    |
| 8147848 | OXR1                 | -1.1897044 | down | oxidation resistance 1                                                   |
| 7927915 | STOX1                | -1.1897415 | down | storkhead box 1                                                          |
| 8154132 | C9orf70              | -1.1902887 | down | chromosome 9 open reading frame 70                                       |
| 7928671 | C10orf57             | -1.1903567 | down | chromosome 10 open reading frame 57                                      |
| 8120102 | CD2AP                | -1.1915804 | down | CD2-associated protein                                                   |
| 8147661 | SPAG1                | -1.1925102 | down | sperm associated antigen 1                                               |
| 8136979 | CTAGE6 CTAGE4 CTAGE5 | -1.192833  | down | CTAGE family, member 6   CTAGE family, member 4   CTAGE family, member 5 |
| 7983890 | Gcom1 GRINL1A        | -1.1938818 | down | GRINL1A combined protein   glutamate receptor, ionotropic, NMDA 1A       |
| 7974461 | LGALS3               | -1.1943259 | down | lectin, galactoside-binding, soluble, 3                                  |
| 8108251 | NPY6R                | -1.1952398 | down | neuropeptide Y receptor Y6 (pseudogene)                                  |
| 7960438 | TMEM16B              | -1.1953136 | down | transmembrane protein 16B                                                |
| 7954382 | PYROXD1              | -1.1960994 | down | pyridine nucleotide-disulphide oxidoreductase domain                     |

Supplemental Table 1c  
eMSC vs. eSF

|         |                |            |      |                                                          |
|---------|----------------|------------|------|----------------------------------------------------------|
| 8129560 | CTAGE6 CTAGE4  | -1.1972128 | down | CTAGE family, member 6   CTAGE family, member 4          |
| 8164200 | ANGPTL2        | -1.1980608 | down | angiopoietin-like 2                                      |
| 8136315 | LRGUK          | -1.198749  | down | leucine-rich repeats and guanylate kinase domain cont    |
| 8103092 | LOC100129572   | -1.198799  | down |                                                          |
| 7916343 | YIPF1          | -1.1992708 | down | Yip1 domain family, member 1                             |
| 8006415 | TMEM98         | -1.1994426 | down | transmembrane protein 98                                 |
| 7902074 | LEPR LEPROT    | -1.200055  | down | leptin receptor   leptin receptor overlapping transcript |
| 8147221 | OSGIN2         | -1.2015034 | down | oxidative stress induced growth inhibitor family memb    |
| 8155563 | LOC100132139 L | -1.20181   | down | similar to methylenetetrahydrofolate dehydrogenase (     |
| 7963212 | SLC11A2        | -1.2018478 | down | solute carrier family 11 (proton-coupled divalent meta   |
| 7943749 | LAYN           | -1.2026485 | down | layilin                                                  |
| 8162570 | HSD17B3        | -1.2026565 | down | hydroxysteroid (17-beta) dehydrogenase 3                 |
| 8085788 | NKIRAS1        | -1.2029128 | down | NFKB inhibitor interacting Ras-like 1                    |
| 8042519 | PCYOX1         | -1.2033635 | down | prenylcysteine oxidase 1                                 |
| 8151254 | NCOA2          | -1.2034775 | down | nuclear receptor coactivator 2                           |
| 8094501 | STIM2          | -1.203541  | down | stromal interaction molecule 2                           |
| 7928171 | SGPL1          | -1.203605  | down | sphingosine-1-phosphate lyase 1                          |
| 7989146 | MNS1           | -1.2037123 | down | meiosis-specific nuclear structural 1                    |
| 7982271 | FAM7A1 GOLGA9  | -1.2037301 | down | family with sequence similarity 7, member A1   golgi a   |
| 8089606 | WDR52          | -1.2039782 | down | WD repeat domain 52                                      |
| 8157038 | SLC44A1        | -1.2045474 | down | solute carrier family 44, member 1                       |
| 8105918 | GTF2H2 DKFZP68 | -1.204745  | down | general transcription factor IIH, polypeptide 2, 44kDa   |
| 8168622 | KLHL4          | -1.2051712 | down | kelch-like 4 (Drosophila)                                |
| 8008629 | DGKE           | -1.2051909 | down | diacylglycerol kinase, epsilon 64kDa                     |
| 7903162 | TMEM56         | -1.2054383 | down | transmembrane protein 56                                 |
| 7975971 | C14orf174      | -1.2055916 | down | chromosome 14 open reading frame 174                     |
| 7919226 | POLR3C         | -1.2056483 | down | polymerase (RNA) III (DNA directed) polypeptide C (62l   |
| 8041940 | STON1-GTF2A1L  | -1.2079194 | down |                                                          |
| 7936968 | ADAM12         | -1.2086948 | down | ADAM metallopeptidase domain 12 (meltrin alpha)          |
| 8034393 | ZNF443         | -1.2088597 | down | zinc finger protein 443                                  |
| 8103789 | GPM6A          | -1.2092881 | down | glycoprotein M6A                                         |
| 8175574 | SLITRK4        | -1.2093344 | down | SLIT and NTRK-like family, member 4                      |
| 8017162 | RNFT1          | -1.2099178 | down | ring finger protein, transmembrane 1                     |

Supplemental Table 1c  
eMSC vs. eSF

|         |                |            |      |                                                           |
|---------|----------------|------------|------|-----------------------------------------------------------|
| 8112538 | GTF2H2 DKFZP68 | -1.2100959 | down | general transcription factor IIH, polypeptide 2, 44kDa    |
| 7969179 | RNASEH2B       | -1.2103218 | down | ribonuclease H2, subunit B                                |
| 7966448 | TMEM116        | -1.2109079 | down | transmembrane protein 116                                 |
| 8120943 | CYB5R4         | -1.211757  | down | cytochrome b5 reductase 4                                 |
| 8046604 | AGPS           | -1.2126377 | down | alkylglycerone phosphate synthase                         |
| 8121578 | NT5DC1         | -1.212787  | down | 5'-nucleotidase domain containing 1                       |
| 8078650 | CTDSPL         | -1.2134402 | down | CTD (carboxy-terminal domain, RNA polymerase II, pol      |
| 7974090 | CTAGE5         | -1.2137178 | down | CTAGE family, member 5                                    |
| 7956759 | SRGAP1         | -1.2139912 | down | SLIT-ROBO Rho GTPase activating protein 1                 |
| 8144701 | LOC100131581   | -1.2141418 | down |                                                           |
| 8034315 | ZNF823         | -1.2143236 | down | zinc finger protein 823                                   |
| 8053668 | EIF2AK3        | -1.2146535 | down | eukaryotic translation initiation factor 2-alpha kinase 3 |
| 8088560 | ADAMTS9        | -1.2147611 | down | ADAM metalloproteinase with thrombospondin type 1         |
| 8100145 | COMMD8         | -1.2157665 | down | COMM domain containing 8                                  |
| 7951207 | TMEM123        | -1.2158185 | down | transmembrane protein 123                                 |
| 7918768 | DENND2C        | -1.2158483 | down | DENN/MADD domain containing 2C                            |
| 8161484 | LOC100132139 L | -1.2162803 | down | similar to methylenetetrahydrofolate dehydrogenase (      |
| 7957433 | LRRIQ1         | -1.2164189 | down | leucine-rich repeats and IQ motif containing 1            |
| 8106556 | CMYA5          | -1.2165273 | down | cardiomyopathy associated 5                               |
| 8047538 | BMPR2          | -1.2170966 | down | bone morphogenetic protein receptor, type II (serine/t    |
| 8149555 | PSD3           | -1.2173955 | down | pleckstrin and Sec7 domain containing 3                   |
| 8027254 | ZNF90          | -1.2174457 | down | zinc finger protein 90                                    |
| 8121257 | PRDM1          | -1.2176619 | down | PR domain containing 1, with ZNF domain                   |
| 8167957 | ZC3H12B        | -1.217777  | down | zinc finger CCCH-type containing 12B                      |
| 8044849 | PTPN4          | -1.2179313 | down | protein tyrosine phosphatase, non-receptor type 4 (me     |
| 8177507 | GTF2H2 DKFZP68 | -1.218017  | down | general transcription factor IIH, polypeptide 2, 44kDa    |
| 7977270 | LOC388022      | -1.218182  | down | hypothetical gene supported by AK131040                   |
| 7984813 | ISLR           | -1.218455  | down | immunoglobulin superfamily containing leucine-rich re     |
| 8152041 | RNF19A         | -1.2192402 | down | ring finger protein 19A                                   |
| 8105970 | GTF2H2 DKFZP68 | -1.2195337 | down | general transcription factor IIH, polypeptide 2, 44kDa    |
| 8046759 | DNAJC10        | -1.2200469 | down | DnaJ (Hsp40) homolog, subfamily C, member 10              |
| 8057578 | CALCRL         | -1.2211032 | down | calcitonin receptor-like                                  |
| 8069620 | MRPL39         | -1.2212667 | down | mitochondrial ribosomal protein L39                       |



Supplemental Table 1c  
eMSC vs. eSF

|         |                 |            |      |                                                             |
|---------|-----------------|------------|------|-------------------------------------------------------------|
| 7948656 | FTH1            | -1.2220286 | down | ferritin, heavy polypeptide 1                               |
| 8021984 | YES1            | -1.2221034 | down | v-yes-1 Yamaguchi sarcoma viral oncogene homolog 1          |
| 8166219 | SYAP1           | -1.2226019 | down | synapse associated protein 1, SAP47 homolog (Drosopl        |
| 8047784 | ZDBF2           | -1.2227443 | down | zinc finger, DBF-type containing 2                          |
| 8122933 | TIAM2           | -1.2230158 | down | T-cell lymphoma invasion and metastasis 2                   |
| 8011832 | NUP88           | -1.223414  | down | nucleoporin 88kDa                                           |
| 8099841 | TLR6            | -1.2236753 | down | toll-like receptor 6                                        |
| 8042291 | AFTPH           | -1.2237802 | down | aftiphilin                                                  |
| 8105579 | IPO11           | -1.2243629 | down | importin 11                                                 |
| 7976795 | MEG3 LOC10013:  | -1.2249112 | down | maternally expressed 3   hypothetical protein LOC100:       |
| 7937335 | IFITM1          | -1.2250707 | down | interferon induced transmembrane protein 1 (9-27)           |
| 7930818 | DKFZp781N1041   | -1.2257289 | down | similar to RIKEN cDNA 6430537H07 gene                       |
| 8113914 | FNIP1 RAPGEF6   | -1.2265663 | down | folliculin interacting protein 1   Rap guanine nucleotid    |
| 8144699 | LRLE1 LOC10012: | -1.2283491 | down | liver-related low express protein 1   similar to liver-rel: |
| 8068238 | IFNAR2          | -1.2287718 | down | interferon (alpha, beta and omega) receptor 2               |
| 8112746 | WDR41           | -1.2294068 | down | WD repeat domain 41                                         |
| 8030914 | ZNF610          | -1.2300516 | down | zinc finger protein 610                                     |
| 7918379 | GSTM3           | -1.2302854 | down | glutathione S-transferase M3 (brain)                        |
| 8035789 | ZNF826 ZNF737   | -1.2308472 | down | zinc finger protein 826   zinc finger protein 737           |
| 8157246 | KIAA1958        | -1.2317827 | down |                                                             |
| 7965048 | NAP1L1          | -1.2323769 | down | nucleosome assembly protein 1-like 1                        |
| 7927288 | FAM35A          | -1.2324344 | down | family with sequence similarity 35, member A                |
| 7923141 | DENND1B C1orf2  | -1.2327375 | down | DENN/MADD domain containing 1B   chromosome 1 c             |
| 8172395 | SSX10 LOC10013: | -1.2329271 | down | synovial sarcoma, X breakpoint 10   similar to Synovial     |
| 7919326 | ACP6            | -1.2332486 | down | acid phosphatase 6, lysophosphatidic                        |
| 8154823 | ANKRD18B        | -1.2341065 | down | ankyrin repeat domain 18B                                   |
| 7939329 | PDHX            | -1.2349412 | down | pyruvate dehydrogenase complex, component X                 |
| 8038989 | ZNF600          | -1.2351059 | down | zinc finger protein 600                                     |
| 8022338 | DISP2 LOC728211 | -1.2352248 | down | dispatched homolog 2 (Drosophila)   hypothetical LOC        |
| 8020037 | KIAA0802        | -1.2363436 | down |                                                             |
| 7973727 | KIAA1305        | -1.2366986 | down |                                                             |
| 8135661 | CFTR            | -1.2369772 | down | cystic fibrosis transmembrane conductance regulator (       |
| 8171205 | NLGN4X          | -1.2371433 | down | neuroligin 4, X-linked                                      |

Supplemental Table 1c  
eMSC vs. eSF

|         |                |            |      |                                                        |
|---------|----------------|------------|------|--------------------------------------------------------|
| 8086125 | LBA1           | -1.2376332 | down | lupus brain antigen 1                                  |
| 8146930 | TMEM70         | -1.2383558 | down | transmembrane protein 70                               |
| 8157144 | C9orf6         | -1.2392023 | down | chromosome 9 open reading frame 6                      |
| 8123893 | MAK            | -1.2394466 | down | male germ cell-associated kinase                       |
| 8154254 | KIAA1432       | -1.2396088 | down |                                                        |
| 7953135 | TULP3          | -1.2412237 | down | tubby like protein 3                                   |
| 7977497 | CCNB1IP1       | -1.241483  | down | cyclin B1 interacting protein 1                        |
| 7913694 | FUCA1          | -1.2418587 | down | fucosidase, alpha-L- 1, tissue                         |
| 8092073 | EIF5A2         | -1.2418833 | down | eukaryotic translation initiation factor 5A2           |
| 8152597 | MRPL13         | -1.2419983 | down | mitochondrial ribosomal protein L13                    |
| 8106210 | RGNEF          | -1.242035  | down | Rho-guanine nucleotide exchange factor                 |
| 8081362 | CEP97          | -1.2427226 | down | centrosomal protein 97kDa                              |
| 8156126 | RMI1           | -1.2433585 | down |                                                        |
| 8144516 | THEX1          | -1.243548  | down | three prime histone mRNA exonuclease 1                 |
| 8091078 | RBP1           | -1.2439063 | down | retinol binding protein 1, cellular                    |
| 8159900 | GLIS3          | -1.2441949 | down | GLIS family zinc finger 3                              |
| 8102720 | ANKRD50        | -1.2446249 | down | ankyrin repeat domain 50                               |
| 7916669 | DOCK7          | -1.2453054 | down | dedicator of cytokinesis 7                             |
| 8089993 | WDR5B          | -1.2453492 | down | WD repeat domain 5B                                    |
| 7929536 | CC2D2B LOC1001 | -1.2457669 | down | coiled-coil and C2 domain containing 2B   hypothetical |
| 7930380 | ADD3           | -1.2475333 | down | adducin 3 (gamma)                                      |
| 8035773 | ZNF506         | -1.247583  | down | zinc finger protein 506                                |
| 7978718 | SEC23A         | -1.2476838 | down | Sec23 homolog A (S. cerevisiae)                        |
| 7963946 | MMP19          | -1.247692  | down | matrix metalloproteinase 19                            |
| 7907893 | MR1            | -1.2484437 | down | major histocompatibility complex, class I-related      |
| 7984517 | GLCE           | -1.2486341 | down | glucuronic acid epimerase                              |
| 8020898 | ZNF271         | -1.2487344 | down | zinc finger protein 271                                |
| 8066848 | PREX1          | -1.249828  | down | phosphatidylinositol 3,4,5-trisphosphate-dependent R   |
| 7972369 | UGCGL2         | -1.2501228 | down | UDP-glucose ceramide glucosyltransferase-like 2        |
| 8043071 | LOC200383      | -1.2501824 | down | similar to Dynein heavy chain at 16F                   |
| 8134257 | GNG11          | -1.2504807 | down | guanine nucleotide binding protein (G protein), gamma  |
| 8094609 | FAM114A1       | -1.2509977 | down | family with sequence similarity 114, member A1         |
| 7984112 | RAB8B          | -1.2511615 | down |                                                        |

Supplemental Table 1c  
eMSC vs. eSF

|         |           |            |      |                                                          |
|---------|-----------|------------|------|----------------------------------------------------------|
| 8149629 | GFRA2     | -1.2517327 | down | GDNF family receptor alpha 2                             |
| 7909603 | NENF      | -1.2528017 | down | neuron derived neurotrophic factor                       |
| 7986428 | LOC400464 | -1.2529676 | down | similar to FLJ43276 protein                              |
| 7925500 | CHML      | -1.2529873 | down | choroideremia-like (Rab escort protein 2)                |
| 7965964 | SLC41A2   | -1.2534412 | down | solute carrier family 41, member 2                       |
| 8061186 | SEC23B    | -1.2540252 | down | Sec23 homolog B ( <i>S. cerevisiae</i> )                 |
| 8127094 | GSTA4     | -1.2541276 | down | glutathione S-transferase A4                             |
| 8131975 | TAX1BP1   | -1.2541593 | down | Tax1 (human T-cell leukemia virus type I) binding prote  |
| 7925672 | ZNF670    | -1.2547495 | down | zinc finger protein 670                                  |
| 8142646 | IQUB      | -1.2562941 | down | IQ motif and ubiquitin domain containing                 |
| 8130556 | SOD2      | -1.2566069 | down | superoxide dismutase 2, mitochondrial                    |
| 8154128 | DSERG1    | -1.2568046 | down | Down syndrome encephalopathy related protein 1           |
| 7988286 | SPG11     | -1.2568566 | down | spastic paraplegia 11 (autosomal recessive)              |
| 8082965 | MRAS      | -1.2569156 | down | muscle RAS oncogene homolog                              |
| 7964347 | TMEM194   | -1.2571652 | down | transmembrane protein 194                                |
| 8082100 | PARP14    | -1.2572542 | down | poly (ADP-ribose) polymerase family, member 14           |
| 8085556 | SH3BP5    | -1.2574    | down | SH3-domain binding protein 5 (BTK-associated)            |
| 8175492 | ATP11C    | -1.258396  | down | ATPase, class VI, type 11C                               |
| 8123884 | C6orf52   | -1.2584041 | down | chromosome 6 open reading frame 52                       |
| 8146517 | CHCHD7    | -1.2584214 | down | coiled-coil-helix-coiled-coil-helix domain containing 7  |
| 7954717 | BICD1     | -1.2585449 | down | bicaudal D homolog 1 ( <i>Drosophila</i> )               |
| 7995697 | LPCAT2    | -1.2586378 | down | lysophosphatidylcholine acyltransferase 2                |
| 7903959 | C1orf88   | -1.2597014 | down | chromosome 1 open reading frame 88                       |
| 7927082 | HSD17B7P2 | -1.2601564 | down | hydroxysteroid (17-beta) dehydrogenase 7 pseudogen       |
| 8107909 | SLC22A4   | -1.2602586 | down | solute carrier family 22 (organic cation/ergothioneine t |
| 8001387 | SALL1     | -1.261262  | down | sal-like 1 ( <i>Drosophila</i> )                         |
| 8040672 | C2orf39   | -1.2615274 | down | chromosome 2 open reading frame 39                       |
| 8164013 | STRBP     | -1.2617362 | down | spermatid perinuclear RNA binding protein                |
| 8133818 | PHTF2     | -1.262143  | down | putative homeodomain transcription factor 2              |
| 8165911 | TBL1X     | -1.2623049 | down | transducin (beta)-like 1X-linked                         |
| 8115734 | LCP2      | -1.2625594 | down | lymphocyte cytosolic protein 2 (SH2 domain containing    |
| 7983157 | TMEM62    | -1.2633597 | down | transmembrane protein 62                                 |
| 7969544 | NDFIP2    | -1.2634451 | down | Nedd4 family interacting protein 2                       |

Supplemental Table 1c  
eMSC vs. eSF

|         |                |            |      |                                                                                     |
|---------|----------------|------------|------|-------------------------------------------------------------------------------------|
| 8084955 | PIGX           | -1.2639433 | down | phosphatidylinositol glycan anchor biosynthesis, class 3                            |
| 7950578 | PAK1           | -1.2647227 | down | p21/Cdc42/Rac1-activated kinase 1 (STE20 homolog, yeast)                            |
| 7968883 | C13orf31       | -1.2650372 | down | chromosome 13 open reading frame 31                                                 |
| 7951535 | KDELC2         | -1.2655535 | down | KDEL (Lys-Asp-Glu-Leu) containing 2                                                 |
| 8098328 | GALNT7         | -1.2658848 | down | UDP-N-acetyl-alpha-D-galactosamine:polypeptide N-acetyltransferase 7                |
| 8097388 | LARP2          | -1.2662021 | down | La ribonucleoprotein domain family, member 2                                        |
| 8130499 | DYNLT1         | -1.2672364 | down | dynein, light chain, Tctex-type 1                                                   |
| 7906904 | HSD17B7 HSD17E | -1.267272  | down | hydroxysteroid (17-beta) dehydrogenase 7   hydroxysteroid (17-beta) dehydrogenase 7 |
| 8007176 | TTC25          | -1.267489  | down | tetratricopeptide repeat domain 25                                                  |
| 8092654 | RPL39L         | -1.26778   | down | ribosomal protein L39-like                                                          |
| 8134098 | PFTK1          | -1.2678872 | down | PFTAIRE protein kinase 1                                                            |
| 8121510 | BXDC1          | -1.2681947 | down | brich domain containing 1                                                           |
| 8138765 | HOXA11         | -1.2684919 | down | homeobox A11                                                                        |
| 7919139 | LOC375010      | -1.2701777 | down |                                                                                     |
| 7943051 | NAALAD2        | -1.270335  | down | N-acetylated alpha-linked acidic dipeptidase 2                                      |
| 8060940 | C20orf103      | -1.2706513 | down | chromosome 20 open reading frame 103                                                |
| 8081386 | NFKBIZ         | -1.2716334 | down | nuclear factor of kappa light polypeptide gene enhancer in B-cells 2                |
| 7921862 | C1orf192       | -1.2723687 | down | chromosome 1 open reading frame 192                                                 |
| 8112940 | SSBP2          | -1.272391  | down | single-stranded DNA binding protein 2                                               |
| 7951077 | SESN3          | -1.2737715 | down | sestrin 3                                                                           |
| 8110520 | LOC729595      | -1.2740879 | down | similar to high-mobility group box 3                                                |
| 8058373 | WDR12          | -1.2748199 | down | WD repeat domain 12                                                                 |
| 7983763 | MAPK6          | -1.2752204 | down | mitogen-activated protein kinase 6                                                  |
| 7925342 | ERO1LB         | -1.2755638 | down | ERO1-like beta ( <i>S. cerevisiae</i> )                                             |
| 7903092 | FNBP1L         | -1.2756078 | down | formin binding protein 1-like                                                       |
| 8143629 | OR2A9P OR2A20I | -1.2762464 | down | olfactory receptor, family 2, subfamily A, member 9 protein                         |
| 7987642 | NDUFAF1        | -1.2764435 | down | NADH dehydrogenase (ubiquinone) 1 alpha subcomplex 1                                |
| 8132860 | EGFR           | -1.276661  | down | epidermal growth factor receptor (erythroblastic leukemia) 1                        |
| 8172035 | DYNLT3         | -1.277025  | down | dynein, light chain, Tctex-type 3                                                   |
| 8091120 | GK5            | -1.2776617 | down | glycerol kinase 5 (putative)                                                        |
| 8123038 | GTF2H5         | -1.2782819 | down | general transcription factor IIH, polypeptide 5                                     |
| 7915425 | ZMYND12        | -1.2805538 | down | zinc finger, MYND-type containing 12                                                |
| 8047356 | NIF3L1         | -1.2805833 | down | NIF3 NGG1 interacting factor 3-like 1 ( <i>S. pombe</i> )                           |

Supplemental Table 1c  
eMSC vs. eSF

|         |                  |            |      |                                                                       |
|---------|------------------|------------|------|-----------------------------------------------------------------------|
| 8069532 | STCH             | -1.2807562 | down | stress 70 protein chaperone, microsomal-associated, 66 kDa            |
| 7922162 | SLC19A2          | -1.2813581 | down | solute carrier family 19 (thiamine transporter), member 2             |
| 8057933 | GTF3C3           | -1.2825073 | down | general transcription factor III C, polypeptide 3, 102 kDa            |
| 7980547 | SEL1L            | -1.2828732 | down | sel-1 suppressor of lin-12-like (C. elegans)                          |
| 8157105 | ZNF462           | -1.2830799 | down | zinc finger protein 462                                               |
| 8136516 | tcag7.1228       | -1.2845634 | down | hypothetical protein FLJ25778                                         |
| 8147112 | CA13             | -1.2848454 | down | carbonic anhydrase XIII                                               |
| 8174527 | CAPN6            | -1.2858499 | down | calpain 6                                                             |
| 7918223 | C1orf59          | -1.2863635 | down | chromosome 1 open reading frame 59                                    |
| 8138454 | TWISTNB          | -1.2864468 | down | TWIST neighbor                                                        |
| 8155630 | LOC100132139 L1  | -1.2872742 | down | similar to methylenetetrahydrofolate dehydrogenase (cytosolic)        |
| 8113761 | ZNF608           | -1.2874328 | down | zinc finger protein 608                                               |
| 8020779 | DSG2             | -1.2874459 | down | desmoglein 2                                                          |
| 7925229 | B3GALNT2         | -1.2876322 | down | beta-1,3-N-acetylgalactosaminyltransferase 2                          |
| 8122348 | VTA1             | -1.2876407 | down | Vps20-associated 1 homolog (S. cerevisiae)                            |
| 8113623 | TICAM2 TMED7     | -1.2879249 | down | toll-like receptor adaptor molecule 2   transmembrane protein 2       |
| 8097056 | SNORA24          | -1.2879875 | down | small nucleolar RNA, H/ACA box 24                                     |
| 8112202 | PLK2             | -1.2888191 | down | polo-like kinase 2 (Drosophila)                                       |
| 8017885 | ABCA8            | -1.2890025 | down | ATP-binding cassette, sub-family A (ABC1), member 8                   |
| 8059708 | SNORA75          | -1.2891942 | down | small nucleolar RNA, H/ACA box 75                                     |
| 8171297 | MID1             | -1.2894353 | down | midline 1 (Opitz/BBB syndrome)                                        |
| 8161377 | LOC100132139 L1  | -1.2907029 | down | similar to methylenetetrahydrofolate dehydrogenase (cytosolic)        |
| 8121927 | RNF146           | -1.2922844 | down | ring finger protein 146                                               |
| 8089759 | TMEM39A          | -1.2926317 | down | transmembrane protein 39A                                             |
| 8175269 | FAM122B          | -1.2937185 | down | family with sequence similarity 122B                                  |
| 7917370 | COL24A1          | -1.294012  | down | collagen, type XXIV, alpha 1                                          |
| 8158183 | DNM1             | -1.2941366 | down | dynamamin 1                                                           |
| 7936734 | FGFR2            | -1.2942716 | down | fibroblast growth factor receptor 2 (bacteria-expressed)              |
| 7979085 | PYGL             | -1.2946708 | down | phosphorylase, glycogen; liver (Hers disease, glycogen phosphorylase) |
| 7931097 | HTRA1            | -1.2949917 | down | HtrA serine peptidase 1                                               |
| 8129254 | MAN1A1           | -1.2951354 | down | mannosidase, alpha, class 1A, member 1                                |
| 8020349 | ANKRD20B CCDC127 | -1.2954736 | down | ankyrin repeat domain 20B   coiled-coil domain containing protein 127 |
| 7935692 | ERLIN1           | -1.2955614 | down | ER lipid raft associated 1                                            |

Supplemental Table 1c  
eMSC vs. eSF

|         |                     |            |      |                                                            |
|---------|---------------------|------------|------|------------------------------------------------------------|
| 8017651 | SMURF2              | -1.2957504 | down | SMAD specific E3 ubiquitin protein ligase 2                |
| 8045499 | HNMT                | -1.2958928 | down | histamine N-methyltransferase                              |
| 8098441 | ODZ3                | -1.2969611 | down | odz, odd Oz/ten-m homolog 3 (Drosophila)                   |
| 8005458 | LGALS9   LOC6543    | -1.2972528 | down | lectin, galactoside-binding, soluble, 9 (galectin 9)   sim |
| 7971124 | UFM1                | -1.2973617 | down | ubiquitin-fold modifier 1                                  |
| 8021453 | SEC11C              | -1.2984402 | down | SEC11 homolog C ( <i>S. cerevisiae</i> )                   |
| 7957688 | C12orf63            | -1.2987485 | down | chromosome 12 open reading frame 63                        |
| 8094132 | DUB4   USP17   DUB4 | -1.3000809 | down | deubiquitinating enzyme DUB4   ubiquitin specific pep      |
| 7948987 | HRASLS3             | -1.3001615 | down | HRAS-like suppressor 3                                     |
| 8094126 | DUB4   USP17   DUB4 | -1.3012599 | down | deubiquitinating enzyme DUB4   ubiquitin specific pep      |
| 8094128 | DUB4   USP17   DUB4 | -1.3013208 | down | deubiquitinating enzyme DUB4   ubiquitin specific pep      |
| 8094120 | DUB4   USP17   DUB4 | -1.3014133 | down | deubiquitinating enzyme DUB4   ubiquitin specific pep      |
| 8123274 | MAP3K4              | -1.3016938 | down | mitogen-activated protein kinase kinase kinase 4           |
| 8154416 | C9orf93             | -1.3019615 | down | chromosome 9 open reading frame 93                         |
| 8094118 | DUB4   USP17   DUB4 | -1.3020442 | down | deubiquitinating enzyme DUB4   ubiquitin specific pep      |
| 8173310 | OPHN1               | -1.3021964 | down | oligophrenin 1                                             |
| 8129901 | REPS1               | -1.3023068 | down | RALBP1 associated Eps domain containing 1                  |
| 8108729 | PCDHB11             | -1.3023118 | down | protocadherin beta 11                                      |
| 8094124 | DUB4   USP17   DUB4 | -1.3024144 | down | deubiquitinating enzyme DUB4   ubiquitin specific pep      |
| 7936871 | OAT                 | -1.3027787 | down | ornithine aminotransferase (gyrate atrophy)                |
| 7908125 | RGL1                | -1.3029068 | down | ral guanine nucleotide dissociation stimulator-like 1      |
| 8043043 | DNHL1   LOC20038    | -1.3029588 | down | dynein heavy chain-like 1   similar to Dynein heavy cha    |
| 8072360 | TCN2                | -1.3036853 | down | transcobalamin II; macrocytic anemia                       |
| 8105663 | NLN                 | -1.3038825 | down | neurolysin (metallopeptidase M3 family)                    |
| 8098195 | SC4MOL              | -1.3044091 | down | sterol-C4-methyl oxidase-like                              |
| 8094116 | CPZ   USP17   DUB3  | -1.3045115 | down | carboxypeptidase Z   ubiquitin specific peptidase 17       |
| 7990636 | C15orf5             | -1.3053643 | down | chromosome 15 open reading frame 5                         |
| 8058552 | IDH1                | -1.3053771 | down | isocitrate dehydrogenase 1 (NADP+), soluble                |
| 8045587 | ACVR2A              | -1.3054138 | down | activin A receptor, type IIA                               |
| 7923453 | JARID1B             | -1.3056513 | down | jumonji, AT rich interactive domain 1B                     |
| 8105862 | CDK7                | -1.3059704 | down | cyclin-dependent kinase 7                                  |
| 8062108 | PROCR               | -1.3063489 | down | protein C receptor, endothelial (EPCR)                     |
| 8076612 | EFCAB6              | -1.3064139 | down | EF-hand calcium binding domain 6                           |

Supplemental Table 1c  
eMSC vs. eSF

|         |                 |            |      |                                                             |
|---------|-----------------|------------|------|-------------------------------------------------------------|
| 8068593 | ETS2            | -1.3076311 | down | v-ets erythroblastosis virus E26 oncogene homolog 2 (c      |
| 8044882 | EPB41L5         | -1.3089298 | down | erythrocyte membrane protein band 4.1 like 5                |
| 7900395 | RLF             | -1.309986  | down | rearranged L-myc fusion                                     |
| 8094520 | PCDH7           | -1.3100641 | down | protocadherin 7                                             |
| 7927267 | FAM35A          | -1.3101392 | down | family with sequence similarity 35, member A                |
| 7957032 | YEATS4          | -1.3102545 | down | YEATS domain containing 4                                   |
| 8177462 | CDK7            | -1.3103625 | down | cyclin-dependent kinase 7                                   |
| 8119000 | MAPK14          | -1.3106555 | down | mitogen-activated protein kinase 14                         |
| 8046333 | CYBRD1          | -1.3111254 | down | cytochrome b reductase 1                                    |
| 8122634 | SAMD5           | -1.3116121 | down | sterile alpha motif domain containing 5                     |
| 8112857 | MTX3            | -1.3122382 | down | metaxin 3                                                   |
| 8172056 | RPGR            | -1.3128753 | down | retinitis pigmentosa GTPase regulator                       |
| 7946815 | PIK3C2A         | -1.313083  | down | phosphoinositide-3-kinase, class 2, alpha polypeptide       |
| 8094130 | DUB4 USP17 DUI  | -1.3143951 | down | deubiquitinating enzyme DUB4   ubiquitin specific pep       |
| 7943162 | C11orf54        | -1.3145074 | down | chromosome 11 open reading frame 54                         |
| 8034390 | ZNF799          | -1.3157752 | down | zinc finger protein 799                                     |
| 8088339 | ARF4            | -1.3159915 | down | ADP-ribosylation factor 4                                   |
| 8027247 | ZNF93           | -1.3172871 | down | zinc finger protein 93                                      |
| 7954208 | PIK3C2G         | -1.3177114 | down | phosphoinositide-3-kinase, class 2, gamma polypeptide       |
| 8172698 | SHROOM4         | -1.3184522 | down | shroom family member 4                                      |
| 7974109 | LRFN5           | -1.3186067 | down | leucine rich repeat and fibronectin type III domain con     |
| 8091723 | RARRES1         | -1.3186499 | down | retinoic acid receptor responder (tazarotene induced)       |
| 7936529 | KIAA1598        | -1.3189743 | down |                                                             |
| 8067113 | ZNF217          | -1.3190396 | down | zinc finger protein 217                                     |
| 8056943 | KIAA1715        | -1.3200231 | down |                                                             |
| 8147101 | E2F5            | -1.3201275 | down | E2F transcription factor 5, p130-binding                    |
| 8094122 | DUB4 USP17 DUI  | -1.3205652 | down | deubiquitinating enzyme DUB4   ubiquitin specific pep       |
| 8143433 | MRPS33          | -1.3214161 | down | mitochondrial ribosomal protein S33                         |
| 8085033 | LMLN            | -1.3226242 | down | leishmanolysin-like (metallopeptidase M8 family)            |
| 8167027 | RGN             | -1.3248407 | down | regucalcin (senescence marker protein-30)                   |
| 8129379 | ECHDC1          | -1.3251472 | down | enoyl Coenzyme A hydratase domain containing 1              |
| 8148049 | NOV             | -1.3260754 | down | nephroblastoma overexpressed gene                           |
| 8013450 | LGALS9 LOC2841! | -1.3263997 | down | lectin, galactoside-binding, soluble, 9 (galectin 9)   gale |

Supplemental Table 1c  
eMSC vs. eSF

|         |               |            |      |                                                        |
|---------|---------------|------------|------|--------------------------------------------------------|
| 8140915 | PEX1          | -1.3264952 | down | peroxisome biogenesis factor 1                         |
| 8102713 | NUDT6         | -1.3268058 | down | nudix (nucleoside diphosphate linked moiety X)-type n  |
| 7932227 | NMT2          | -1.3279445 | down | N-myristoyltransferase 2                               |
| 7934870 | ATAD1         | -1.3284965 | down | ATPase family, AAA domain containing 1                 |
| 8114829 | YIPF5         | -1.3288815 | down | Yip1 domain family, member 5                           |
| 8054166 | TSGA10        | -1.3289726 | down | testis specific, 10                                    |
| 8078397 | CMTM8         | -1.3292555 | down | CKLF-like MARVEL transmembrane domain containing       |
| 8063437 | TSHZ2         | -1.3299273 | down | teashirt zinc finger homeobox 2                        |
| 8083166 | TRPC1         | -1.3304539 | down | transient receptor potential cation channel, subfamily |
| 8138370 | ANKMY2        | -1.3311934 | down | ankyrin repeat and MYND domain containing 2            |
| 8128123 | RRAGD         | -1.3313817 | down | Ras-related GTP binding D                              |
| 8135378 | PRKAR2B       | -1.3317779 | down | protein kinase, cAMP-dependent, regulatory, type II, b |
| 8095545 | RUFY3         | -1.3324056 | down | RUN and FYVE domain containing 3                       |
| 8020058 | NDUFV2        | -1.3333345 | down | NADH dehydrogenase (ubiquinone) flavoprotein 2, 24k    |
| 8150002 | FBXO16 ZNF395 | -1.333882  | down | F-box protein 16   zinc finger protein 395             |
| 7970602 | PARP4         | -1.3339772 | down | poly (ADP-ribose) polymerase family, member 4          |
| 8076113 | RP1-199H16.1  | -1.3339995 | down | hypothetical LOC388900                                 |
| 8011945 | KIAA0753      | -1.3345295 | down |                                                        |
| 7918622 | SLC16A1       | -1.3347555 | down | solute carrier family 16, member 1 (monocarboxylic ac  |
| 8126860 | MUT           | -1.3347759 | down | methylmalonyl Coenzyme A mutase                        |
| 8130765 | FAM103A1      | -1.3362775 | down | family with sequence similarity 103, member A1         |
| 8081375 | FAM55C        | -1.3363163 | down | family with sequence similarity 55, member C           |
| 7954388 | GOLT1B        | -1.3371918 | down | golgi transport 1 homolog B ( <i>S. cerevisiae</i> )   |
| 7938890 | PRMT3         | -1.3374112 | down | protein arginine methyltransferase 3                   |
| 8040552 | NCOA1         | -1.3374472 | down | nuclear receptor coactivator 1                         |
| 8047443 | ALS2CR2       | -1.3378191 | down | amyotrophic lateral sclerosis 2 (juvenile) chromosome  |
| 7953873 | OVOS2         | -1.33842   | down | ovostatin 2                                            |
| 8124562 | ZNF323        | -1.3392334 | down | zinc finger protein 323                                |
| 7929032 | FAS           | -1.3392614 | down | Fas (TNF receptor superfamily, member 6)               |
| 7965064 | OSBPL8        | -1.3392966 | down | oxysterol binding protein-like 8                       |
| 7912292 | LZIC          | -1.3397146 | down | leucine zipper and CTNNBIP1 domain containing          |
| 8160531 | C9orf72       | -1.3398097 | down | chromosome 9 open reading frame 72                     |
| 7950683 | NARS2         | -1.3401638 | down | asparaginyl-tRNA synthetase 2, mitochondrial (putativ  |



Supplemental Table 1c  
eMSC vs. eSF

|         |              |            |      |                                                                    |
|---------|--------------|------------|------|--------------------------------------------------------------------|
| 7901336 | ALS2CR2      | -1.3404106 | down | amyotrophic lateral sclerosis 2 (juvenile) chromosome              |
| 8127158 | GCLC         | -1.3414097 | down | glutamate-cysteine ligase, catalytic subunit                       |
| 7971780 | NEK3         | -1.3417407 | down | NIMA (never in mitosis gene a)-related kinase 3                    |
| 8039068 | NDUFV2       | -1.3417933 | down | NADH dehydrogenase (ubiquinone) flavoprotein 2, 24k                |
| 8174141 | BEX5         | -1.3419926 | down | BEX family member 5                                                |
| 8077198 | FLJ43315     | -1.3424119 | down | similar to Asparagine synthetase [glutamine-hydrolyz               |
| 8057732 | LOC100131211 | -1.3429961 | down | similar to hCG1646803                                              |
| 8128795 | C6orf199     | -1.343041  | down | chromosome 6 open reading frame 199                                |
| 7902345 | TYW3         | -1.3430928 | down | tRNA-yW synthesizing protein 3 homolog ( <i>S. cerevisiae</i> )    |
| 8091260 | SLC9A9       | -1.3432231 | down | solute carrier family 9 (sodium/hydrogen exchanger), r             |
| 8051605 | HNRPLL       | -1.3434782 | down | heterogeneous nuclear ribonucleoprotein L-like                     |
| 8107133 | PAM          | -1.3436453 | down | peptidylglycine alpha-amidating monooxygenase                      |
| 8010078 | SNORD1C      | -1.3439798 | down | small nucleolar RNA, C/D box 1C                                    |
| 8005638 | ALDH3A2      | -1.3445165 | down | aldehyde dehydrogenase 3 family, member A2                         |
| 7999598 | NTAN1        | -1.3454789 | down | N-terminal asparagine amidase                                      |
| 8134051 | FLJ21062     | -1.3459183 | down |                                                                    |
| 8098620 | FAM149A      | -1.3474443 | down | family with sequence similarity 149, member A                      |
| 8043059 | LOC200383    | -1.3504584 | down | similar to Dynein heavy chain at 16F                               |
| 8108737 | PCDHB13      | -1.3505305 | down | protocadherin beta 13                                              |
| 8096938 | LARP7        | -1.3505642 | down | La ribonucleoprotein domain family, member 7                       |
| 8136495 | TTC26        | -1.3508139 | down | tetratricopeptide repeat domain 26                                 |
| 7903777 | GSTM5        | -1.35163   | down | glutathione S-transferase M5                                       |
| 8144528 | TNKS         | -1.3525722 | down | tankyrase, TRF1-interacting ankyrin-related ADP-ribose             |
| 8131844 | GPNMB        | -1.3528441 | down | glycoprotein (transmembrane) nmb                                   |
| 8156263 | SPIN1        | -1.3529464 | down | spindlin 1                                                         |
| 7958211 | C12orf45     | -1.353191  | down | chromosome 12 open reading frame 45                                |
| 8113073 | ARRDC3       | -1.3537858 | down | arrestin domain containing 3                                       |
| 8046048 | FAM130A2     | -1.355186  | down | family with sequence similarity 130, member A2                     |
| 8001876 | NAE1         | -1.35732   | down | NEDD8 activating enzyme E1 subunit 1                               |
| 8108127 | CAMLG        | -1.357364  | down | calcium modulating ligand                                          |
| 8105353 | SKIV2L2      | -1.3574022 | down | superkiller viralicidic activity 2-like 2 ( <i>S. cerevisiae</i> ) |
| 8143988 | MLL3         | -1.3581736 | down | myeloid/lymphoid or mixed-lineage leukemia 3                       |
| 8108749 | PCDHB18      | -1.3588045 | down | protocadherin beta 18 pseudogene                                   |

Supplemental Table 1c  
eMSC vs. eSF

|         |           |            |      |                                                                          |
|---------|-----------|------------|------|--------------------------------------------------------------------------|
| 7909768 | SPATA17   | -1.3588736 | down | spermatogenesis associated 17                                            |
| 7933186 | ZNF32     | -1.3591969 | down | zinc finger protein 32                                                   |
| 8089659 | KIAA1407  | -1.3596886 | down |                                                                          |
| 7928855 | BMPR1A    | -1.3603051 | down | bone morphogenetic protein receptor, type IA                             |
| 7911155 | SCCPDH    | -1.3612567 | down | saccharopine dehydrogenase (putative)                                    |
| 8124040 | ATXN1     | -1.3613259 | down | ataxin 1                                                                 |
| 7907160 | ATP1B1    | -1.3614707 | down | ATPase, Na <sup>+</sup> /K <sup>+</sup> transporting, beta 1 polypeptide |
| 8088803 | EIF4E3    | -1.3618331 | down | eukaryotic translation initiation factor 4E family memb                  |
| 8146544 | LOC137886 | -1.3621914 | down |                                                                          |
| 8132897 | LANCL2    | -1.3623937 | down | LanC lantibiotic synthetase component C-like 2 (bacter                   |
| 8162313 | IARS      | -1.365236  | down | isoleucyl-tRNA synthetase                                                |
| 8145835 | ERLIN2    | -1.3653766 | down | ER lipid raft associated 2                                               |
| 7983173 | CCNDBP1   | -1.3658463 | down | cyclin D-type binding-protein 1                                          |
| 7968658 | EXOSC8    | -1.3670226 | down | exosome component 8                                                      |
| 8112649 | KIAA0888  | -1.3671021 | down |                                                                          |
| 7904830 | ZNF364    | -1.3672132 | down | zinc finger protein 364                                                  |
| 8020384 | KIAA1772  | -1.3686503 | down |                                                                          |
| 8102848 | SETD7     | -1.368802  | down | SET domain containing (lysine methyltransferase) 7                       |
| 7959827 | TMEM132C  | -1.3699112 | down | transmembrane protein 132C                                               |
| 8129666 | SLC2A12   | -1.371248  | down | solute carrier family 2 (facilitated glucose transporter),               |
| 8103341 | MAP9      | -1.3728195 | down | microtubule-associated protein 9                                         |
| 8129573 | MOXD1     | -1.3733308 | down | monooxygenase, DBH-like 1                                                |
| 8142407 | TMEM168   | -1.3735623 | down | transmembrane protein 168                                                |
| 8052269 | CCDC88A   | -1.3765123 | down | coiled-coil domain containing 88A                                        |
| 8090678 | MRPL3     | -1.3772585 | down | mitochondrial ribosomal protein L3                                       |
| 7904965 | PDE4DIP   | -1.3772644 | down | phosphodiesterase 4D interacting protein (myomegalin)                    |
| 7903334 | CDC14A    | -1.3775766 | down | CDC14 cell division cycle 14 homolog A ( <i>S. cerevisiae</i> )          |
| 8161270 | ANKRD18A  | -1.3777982 | down | ankyrin repeat domain 18A                                                |
| 7916616 | CYP2J2    | -1.3780211 | down | cytochrome P450, family 2, subfamily J, polypeptide 2                    |
| 8039006 | ZNF320    | -1.3780452 | down | zinc finger protein 320                                                  |
| 8133155 | TPST1     | -1.3786151 | down | tyrosylprotein sulfotransferase 1                                        |
| 7960744 | C1R       | -1.3795472 | down | complement component 1, r subcomponent                                   |
| 7917561 | GBP4      | -1.3808305 | down | guanylate binding protein 4                                              |

Supplemental Table 1c  
eMSC vs. eSF

|         |                |            |      |                                                        |
|---------|----------------|------------|------|--------------------------------------------------------|
| 8162117 | GOLM1          | -1.3813633 | down | golgi membrane protein 1                               |
| 8114653 | TAF7           | -1.3819963 | down |                                                        |
| 7956697 | MON2           | -1.3820643 | down |                                                        |
| 8128683 | SNX3           | -1.3829038 | down | sorting nexin 3                                        |
| 8051762 | SLC8A1         | -1.3831466 | down | solute carrier family 8 (sodium/calcium exchanger), me |
| 8101916 | RG9MTD2        | -1.383431  | down | RNA (guanine-9-) methyltransferase domain containing   |
| 8155169 | RECK           | -1.383491  | down | reversion-inducing-cysteine-rich protein with kazal mo |
| 8108166 | TXNDC15        | -1.3844501 | down | thioredoxin domain containing 15                       |
| 8056710 | LOC129881      | -1.3847066 | down |                                                        |
| 8151436 | PXMP3          | -1.3851334 | down | peroxisomal membrane protein 3, 35kDa (Zellweger sy    |
| 7920291 | S100A16        | -1.3859677 | down | S100 calcium binding protein A16                       |
| 7985488 | FAM103A1       | -1.3863064 | down | family with sequence similarity 103, member A1         |
| 7939137 | EIF3M          | -1.3880812 | down | eukaryotic translation initiation factor 3, subunit M  |
| 8042066 | CCDC104        | -1.3881782 | down | coiled-coil domain containing 104                      |
| 8169073 | MGC39900 H2BF  | -1.3882167 | down | thymosin beta15b   H2B histone family, member X, psi   |
| 8002470 | HYDIN HYDIN2   | -1.3885663 | down | hydrocephalus inducing homolog (mouse)   hydroceph     |
| 8045816 | GPD2           | -1.3892317 | down | glycerol-3-phosphate dehydrogenase 2 (mitochondrial    |
| 8156167 | MAK10          | -1.3895557 | down |                                                        |
| 8111136 | FAM134B        | -1.3904452 | down | family with sequence similarity 134, member B          |
| 8116859 | TMEM14C        | -1.3910292 | down | transmembrane protein 14C                              |
| 8137257 | GIMAP5         | -1.3916525 | down | GTPase, IMAP family member 5                           |
| 8171435 | PIR            | -1.3927535 | down | pirin (iron-binding nuclear protein)                   |
| 7902965 | BTBD8          | -1.3931382 | down | BTB (POZ) domain containing 8                          |
| 8105077 | CARD6          | -1.3939395 | down | caspase recruitment domain family, member 6            |
| 7934133 | PPA1           | -1.3945643 | down | pyrophosphatase (inorganic) 1                          |
| 8066214 | TGM2           | -1.3951226 | down | transglutaminase 2 (C polypeptide, protein-glutamine-  |
| 7946635 | ZBED5          | -1.3961598 | down | zinc finger, BED-type containing 5                     |
| 8152845 | FAM49B         | -1.3963541 | down | family with sequence similarity 49, member B           |
| 7961026 | OVOS LOC728715 | -1.3963943 | down | ovostatin   similar to hCG38149                        |
| 7938608 | SPON1          | -1.3968035 | down | spondin 1, extracellular matrix protein                |
| 8098611 | TLR3           | -1.39705   | down | toll-like receptor 3                                   |
| 7904930 | GPR89B GPR89A  | -1.3972759 | down | G protein-coupled receptor 89B   G protein-coupled re  |
| 8093839 | D4S234E        | -1.3976603 | down | DNA segment on chromosome 4 (unique) 234 expresse      |

Supplemental Table 1c  
eMSC vs. eSF

|         |                  |            |      |                                                          |
|---------|------------------|------------|------|----------------------------------------------------------|
| 7918467 | C1orf103         | -1.3979871 | down | chromosome 1 open reading frame 103                      |
| 7983811 | PIGB             | -1.3982381 | down | phosphatidylinositol glycan anchor biosynthesis, class I |
| 8113483 | XIRP1 FLJ43080   | -1.3984685 | down | xin actin-binding repeat containing 1   hypothetical pr  |
| 7952305 | LOC283155        | -1.3986114 | down |                                                          |
| 7916493 | PPAP2B           | -1.3988175 | down | phosphatidic acid phosphatase type 2B                    |
| 8130129 | NUP43            | -1.3988403 | down | nucleoporin 43kDa                                        |
| 8169352 | NXT2             | -1.3989185 | down | nuclear transport factor 2-like export factor 2          |
| 8089830 | LRRC58           | -1.3992414 | down | leucine rich repeat containing 58                        |
| 8099612 | GPR125           | -1.3996882 | down | G protein-coupled receptor 125                           |
| 7914996 | C1orf149         | -1.4007617 | down | chromosome 1 open reading frame 149                      |
| 8151931 | TSPYL5           | -1.4019753 | down | TSPY-like 5                                              |
| 8097373 | C4orf29          | -1.403252  | down | chromosome 4 open reading frame 29                       |
| 8168984 | BHLHB9           | -1.4036213 | down | basic helix-loop-helix domain containing, class B, 9     |
| 8149521 | FGL1             | -1.4039291 | down | fibrinogen-like 1                                        |
| 8061138 | CSRP2BP          | -1.4041275 | down | CSRP2 binding protein                                    |
| 8081431 | ALCAM            | -1.404739  | down | activated leukocyte cell adhesion molecule               |
| 7927876 | TET1             | -1.4062673 | down | tet oncogene 1                                           |
| 8143144 | PTN              | -1.4069335 | down | pleiotrophin (heparin binding growth factor 8, neurite   |
| 8056022 | CCDC148          | -1.4070066 | down | coiled-coil domain containing 148                        |
| 7985662 | PDE8A            | -1.4071181 | down | phosphodiesterase 8A                                     |
| 7947138 | FANCF            | -1.4077414 | down | Fanconi anemia, complementation group F                  |
| 7957673 | C12orf55 FLJ3447 | -1.4083985 | down | chromosome 12 open reading frame 55   hypothetical       |
| 8046461 | ZAK              | -1.4084196 | down | sterile alpha motif and leucine zipper containing kinase |
| 7964810 | MDM1             | -1.4098608 | down | Mdm1 nuclear protein homolog (mouse)                     |
| 8030931 | ZNF528           | -1.4100763 | down | zinc finger protein 528                                  |
| 8108697 | PCDH5            | -1.4102572 | down | protocadherin beta 5                                     |
| 8147573 | OSR2             | -1.4111779 | down | odd-skipped related 2 (Drosophila)                       |
| 8168691 | DIAPH2           | -1.4111965 | down | diaphanous homolog 2 (Drosophila)                        |
| 8085852 | NGLY1            | -1.4112291 | down | N-glycanase 1                                            |
| 8082607 | ATP2C1           | -1.4116626 | down | ATPase, Ca <sup>++</sup> transporting, type 2C, member 1 |
| 8082750 | UBA5             | -1.4117255 | down | ubiquitin-like modifier activating enzyme 5              |
| 7926385 | STAM             | -1.4117526 | down | signal transducing adaptor molecule (SH3 domain and      |
| 8060949 | ANKRD5           | -1.4121696 | down | ankyrin repeat domain 5                                  |

Supplemental Table 1c  
eMSC vs. eSF

|         |               |            |      |                                                          |
|---------|---------------|------------|------|----------------------------------------------------------|
| 7979400 | C14orf37      | -1.4123814 | down | chromosome 14 open reading frame 37                      |
| 8163444 | ZFP37         | -1.412385  | down | zinc finger protein 37 homolog (mouse)                   |
| 8056837 | GPR155        | -1.4142543 | down | G protein-coupled receptor 155                           |
| 7950885 | FZD4          | -1.4143964 | down | frizzled homolog 4 (Drosophila)                          |
| 7978666 | MBIP          | -1.4147903 | down | MAP3K12 binding inhibitory protein 1                     |
| 8013860 | MYO18A TIAF1  | -1.4150169 | down | myosin XVIII A   TGFB1-induced anti-apoptotic factor 1   |
| 8083092 | ZBTB38        | -1.4152813 | down | zinc finger and BTB domain containing 38                 |
| 7933877 | JMJD1C        | -1.4153825 | down | jumonji domain containing 1C                             |
| 7952069 | C11orf60      | -1.415493  | down | chromosome 11 open reading frame 60                      |
| 8047403 | CASP10        | -1.415712  | down | caspace 10, apoptosis-related cysteine peptidase         |
| 8055688 | RND3          | -1.4157882 | down | Rho family GTPase 3                                      |
| 7947947 | AGBL2         | -1.416481  | down | ATP/GTP binding protein-like 2                           |
| 8112980 | EDIL3         | -1.4165454 | down | EGF-like repeats and discoidin I-like domains 3          |
| 7968789 | C13orf15      | -1.4167507 | down | chromosome 13 open reading frame 15                      |
| 8048733 | ACSL3         | -1.4171171 | down | acyl-CoA synthetase long-chain family member 3           |
| 8068620 | SH3BGR        | -1.4171462 | down | SH3 domain binding glutamic acid-rich protein            |
| 8128650 | SEC63         | -1.4172465 | down |                                                          |
| 8051547 | PRKD3         | -1.417404  | down | protein kinase D3                                        |
| 7979725 | PIGH          | -1.4188368 | down | phosphatidylinositol glycan anchor biosynthesis, class I |
| 8000003 | THUMPD1       | -1.4188387 | down | THUMP domain containing 1                                |
| 8022393 | PTPN2         | -1.4190145 | down | protein tyrosine phosphatase, non-receptor type 2        |
| 7926356 | PTER          | -1.4193097 | down | phosphotriesterase related                               |
| 8082003 | EAF2          | -1.4198594 | down | ELL associated factor 2                                  |
| 8017150 | TUBD1         | -1.4212801 | down | tubulin, delta 1                                         |
| 7933750 | SLC16A9       | -1.4214863 | down | solute carrier family 16, member 9 (monocarboxylic ac    |
| 7919251 | GPR89B GPR89A | -1.4225287 | down | G protein-coupled receptor 89B   G protein-coupled re    |
| 8152656 | ZHX1 C8orf76  | -1.4236457 | down | zinc fingers and homeoboxes 1   chromosome 8 open r      |
| 7909689 | SMYD2         | -1.4237717 | down | SET and MYND domain containing 2                         |
| 7951397 | CASP1         | -1.4242914 | down | caspace 1, apoptosis-related cysteine peptidase (interl  |
| 8040292 | GREB1         | -1.42515   | down |                                                          |
| 8094190 | CC2D2A        | -1.4261571 | down | coiled-coil and C2 domain containing 2A                  |
| 8138749 | HOXA9         | -1.4262367 | down | homeobox A9                                              |
| 8069574 | C21orf91      | -1.4270542 | down | chromosome 21 open reading frame 91                      |

Supplemental Table 1c  
eMSC vs. eSF

|         |           |            |      |                                                                  |
|---------|-----------|------------|------|------------------------------------------------------------------|
| 7951429 | KBTBD3    | -1.4275355 | down | kelch repeat and BTB (POZ) domain containing 3                   |
| 7985044 | UBE2Q2    | -1.4275624 | down | ubiquitin-conjugating enzyme E2Q family member 2                 |
| 8150797 | ATP6V1H   | -1.4278587 | down | ATPase, H <sup>+</sup> transporting, lysosomal 50/57kDa, V1 subu |
| 8050160 | MBOAT2    | -1.4285187 | down | membrane bound O-acyltransferase domain containin                |
| 8045857 | LOC554201 | -1.428961  | down |                                                                  |
| 8152506 | SAMD12    | -1.4290661 | down | sterile alpha motif domain containing 12                         |
| 8094408 | ANAPC4    | -1.4293673 | down | anaphase promoting complex subunit 4                             |
| 7973036 | PARP2     | -1.4301333 | down | poly (ADP-ribose) polymerase family, member 2                    |
| 7917199 | TTLL7     | -1.4302025 | down | tubulin tyrosine ligase-like family, member 7                    |
| 7972682 | KDELC1    | -1.4307075 | down | KDEL (Lys-Asp-Glu-Leu) containing 1                              |
| 8052250 | MTIF2     | -1.431337  | down | mitochondrial translational initiation factor 2                  |
| 7938348 | WEE1      | -1.4319487 | down |                                                                  |
| 8001800 | CDH11     | -1.4322343 | down | cadherin 11, type 2, OB-cadherin (osteoblast)                    |
| 8115368 | NMUR2     | -1.4333861 | down | neuromedin U receptor 2                                          |
| 7969916 | BIVM      | -1.4339246 | down | basic, immunoglobulin-like variable motif containing             |
| 8102214 | PAPSS1    | -1.4343549 | down | 3'-phosphoadenosine 5'-phosphosulfate synthase 1                 |
| 8131815 | KLHL7     | -1.4343979 | down | kelch-like 7 (Drosophila)                                        |
| 7961524 | ERP27     | -1.4348423 | down | endoplasmic reticulum protein 27 kDa                             |
| 7923978 | CD34      | -1.4349426 | down |                                                                  |
| 8142663 | NDUFA5    | -1.4361502 | down | NADH dehydrogenase (ubiquinone) 1 alpha subcomple                |
| 8064967 | MKKS      | -1.436847  | down | McKusick-Kaufman syndrome                                        |
| 7922243 | C1orf156  | -1.4369229 | down | chromosome 1 open reading frame 156                              |
| 8113726 | PPIC      | -1.4377872 | down | peptidylprolyl isomerase C (cyclophilin C)                       |
| 7969935 | ERCC5     | -1.4395427 | down | excision repair cross-complementing rodent repair def            |
| 7918008 | DBT       | -1.4399892 | down | dihydrolipoamide branched chain transacylase E2                  |
| 7928354 | FAM149B1  | -1.4438841 | down | family with sequence similarity 149, member B1                   |
| 7936891 | METTLL10  | -1.4448805 | down | methyltransferase like 10                                        |
| 7905220 | ECM1      | -1.4465677 | down | extracellular matrix protein 1                                   |
| 7917037 | CRYZ      | -1.4468992 | down | crystallin, zeta (quinone reductase)                             |
| 8089988 | CCDC58    | -1.4486501 | down | coiled-coil domain containing 58                                 |
| 7918725 | TRIM33    | -1.4489337 | down | tripartite motif-containing 33                                   |
| 7959638 | TCTN2     | -1.449375  | down | tectonic family member 2                                         |
| 8133057 | ZNF138    | -1.4496394 | down | zinc finger protein 138                                          |

Supplemental Table 1c  
eMSC vs. eSF

|         |                    |            |      |                                                              |
|---------|--------------------|------------|------|--------------------------------------------------------------|
| 8133938 | CROT               | -1.4501095 | down | carnitine O-octanoyltransferase                              |
| 8043278 | MRPL35             | -1.4509768 | down | mitochondrial ribosomal protein L35                          |
| 8099912 | C4orf34            | -1.4512277 | down | chromosome 4 open reading frame 34                           |
| 8173217 | ARHGEF9            | -1.4513232 | down | Cdc42 guanine nucleotide exchange factor (GEF) 9             |
| 7970624 | CENPJ              | -1.4517515 | down | centromere protein J                                         |
| 7912157 | ERRFI1             | -1.452063  | down | ERBB receptor feedback inhibitor 1                           |
| 8103822 | VEGFC              | -1.4526007 | down | vascular endothelial growth factor C                         |
| 8020930 | ELP2               | -1.452831  | down | elongation protein 2 homolog ( <i>S. cerevisiae</i> )        |
| 8111286 | RNASEN             | -1.4540946 | down | ribonuclease type III, nuclear                               |
| 8108099 | SEC24A             | -1.4544715 | down | SEC24 related gene family, member A ( <i>S. cerevisiae</i> ) |
| 8133062 | ZNF273             | -1.4547535 | down | zinc finger protein 273                                      |
| 7961844 | CASC1              | -1.4548087 | down | cancer susceptibility candidate 1                            |
| 8089743 | B4GALT4            | -1.4559598 | down | UDP-Gal:betaGlcNAc beta 1,4- galactosyltransferase, p        |
| 8160284 | FAM29A             | -1.456216  | down | family with sequence similarity 29, member A                 |
| 8138834 | FKBP14             | -1.4565899 | down | FK506 binding protein 14, 22 kDa                             |
| 7950990 | SLC36A4            | -1.4575227 | down | solute carrier family 36 (proton/amino acid symporter)       |
| 7979732 | VTI1B              | -1.4579264 | down | vesicle transport through interaction with t-SNAREs ho       |
| 7899455 | PHACTR4            | -1.4579816 | down | phosphatase and actin regulator 4                            |
| 7965979 | ALDH1L2            | -1.4581316 | down | aldehyde dehydrogenase 1 family, member L2                   |
| 8001507 | BBS2               | -1.4588021 | down | Bardet-Biedl syndrome 2                                      |
| 8138258 | FLJ14712           | -1.4596391 | down |                                                              |
| 8135211 | MGC35361           | -1.4602315 | down |                                                              |
| 7983469 | SPATA5L1           | -1.461961  | down | spermatogenesis associated 5-like 1                          |
| 8147439 | PLEKHF2            | -1.4621185 | down | pleckstrin homology domain containing, family F (with        |
| 8121392 | C6orf182   C6orf18 | -1.4625494 | down | chromosome 6 open reading frame 182   chromosome             |
| 7984686 | BBS4               | -1.4640034 | down | Bardet-Biedl syndrome 4                                      |
| 8122045 | AKAP7              | -1.4640801 | down | A kinase (PRKA) anchor protein 7                             |
| 8052762 | GFPT1              | -1.464691  | down | glutamine-fructose-6-phosphate transaminase 1                |
| 8091648 | SSR3               | -1.4649304 | down | signal sequence receptor, gamma (translocon-associat         |
| 8128818 | WASF1              | -1.4652175 | down | WAS protein family, member 1                                 |
| 8126710 | SUPT3H             | -1.4660954 | down | suppressor of Ty 3 homolog ( <i>S. cerevisiae</i> )          |
| 8075709 | APOL4              | -1.4666752 | down | apolipoprotein L, 4                                          |
| 7975676 | C14orf45           | -1.46679   | down | chromosome 14 open reading frame 45                          |

Supplemental Table 1c  
eMSC vs. eSF

|         |                |            |      |                                                       |
|---------|----------------|------------|------|-------------------------------------------------------|
| 7954460 | LYRM5          | -1.4674106 | down | LYR motif containing 5                                |
| 8161537 | CBWD3 CBWD1 C  | -1.4682728 | down | COBW domain containing 3   COBW domain containi       |
| 8113413 | NUDT12         | -1.4691314 | down | nudix (nucleoside diphosphate linked moiety X)-type n |
| 8020468 | RBBP8          | -1.4691681 | down | retinoblastoma binding protein 8                      |
| 8031837 | ZNF587         | -1.4694781 | down | zinc finger protein 587                               |
| 8102655 | BBS7           | -1.4700382 | down | Bardet-Biedl syndrome 7                               |
| 8046680 | PLEKHA3        | -1.4718678 | down | pleckstrin homology domain containing, family A (phos |
| 8152962 | LRR6           | -1.4719805 | down | leucine rich repeat containing 6                      |
| 7932703 | ACBD5          | -1.4725046 | down | acyl-Coenzyme A binding domain containing 5           |
| 7965789 | ARL1           | -1.4726894 | down | ADP-ribosylation factor-like 1                        |
| 8107859 | LYRM7          | -1.4728385 | down | Lym7 homolog (mouse)                                  |
| 8108703 | PCDHB6         | -1.4732925 | down | protocadherin beta 6                                  |
| 7946245 | DCHS1          | -1.4735414 | down | dachsous 1 (Drosophila)                               |
| 7991640 | TARSL2         | -1.4741423 | down | threonyl-tRNA synthetase-like 2                       |
| 8005603 | SLC47A1        | -1.4745452 | down | solute carrier family 47, member 1                    |
| 8108708 | PCDHB7         | -1.4747671 | down | protocadherin beta 7                                  |
| 8141035 | SGCE           | -1.4750711 | down | sarcoglycan, epsilon                                  |
| 8150143 | PURG           | -1.4756404 | down | purine-rich element binding protein G                 |
| 8121144 | MANEA          | -1.47586   | down | mannosidase, endo-alpha                               |
| 8131475 | C1GALT1        | -1.4762735 | down | core 1 synthase, glycoprotein-N-acetylgalactosamine 3 |
| 8008547 | TOM1L1         | -1.4768412 | down | target of myb1 (chicken)-like 1                       |
| 8046685 | UBE2E3 UBE2E4P | -1.477059  | down | ubiquitin-conjugating enzyme E2E 3 (UBC4/5 homolog,   |
| 8171006 | BRCC3          | -1.4775213 | down | BRCA1/BRCA2-containing complex, subunit 3             |
| 8155636 | CBWD3 CBWD1 C  | -1.4775282 | down | COBW domain containing 3   COBW domain containi       |
| 7928491 | MYST4          | -1.4776882 | down | MYST histone acetyltransferase (monocytic leukemia)   |
| 8068522 | TTC3           | -1.4777967 | down | tetratricopeptide repeat domain 3                     |
| 8002481 | HYDIN HYDIN2   | -1.4782513 | down | hydrocephalus inducing homolog (mouse)   hydroceph    |
| 8096771 | DC2            | -1.4783653 | down |                                                       |
| 8123598 | SERPINB1       | -1.4788173 | down | serpin peptidase inhibitor, clade B (ovalbumin), memb |
| 7934411 | USP54          | -1.4790831 | down | ubiquitin specific peptidase 54                       |
| 8067985 | NCAM2          | -1.4799229 | down | neural cell adhesion molecule 2                       |
| 8098214 | TLL1           | -1.480895  | down | tolloid-like 1                                        |
| 8051707 | MAP4K3         | -1.4818605 | down | mitogen-activated protein kinase kinase kinase kinase |



Supplemental Table 1c  
eMSC vs. eSF

|         |               |            |      |                                                          |
|---------|---------------|------------|------|----------------------------------------------------------|
| 7960411 | C12orf4       | -1.482407  | down | chromosome 12 open reading frame 4                       |
| 8044613 | CBWD1 CBWD3 C | -1.4827119 | down | COBW domain containing 1   COBW domain containin         |
| 8160260 | BNC2          | -1.4829035 | down | basonuclin 2                                             |
| 8023415 | TCF4          | -1.4839735 | down | transcription factor 4                                   |
| 8080847 | C3orf14       | -1.4846299 | down | chromosome 3 open reading frame 14                       |
| 8003060 | HSPC105       | -1.4860972 | down | NAD(P) dependent steroid dehydrogenase-like              |
| 8157092 | TMEM38B       | -1.4861635 | down | transmembrane protein 38B                                |
| 8059801 | USP40         | -1.4863919 | down | ubiquitin specific peptidase 40                          |
| 7925130 | TARBP1        | -1.48683   | down | TAR (HIV-1) RNA binding protein 1                        |
| 8023165 | HDHD2         | -1.4871764 | down | haloacid dehalogenase-like hydrolase domain containi     |
| 7934178 | PCBD1         | -1.4878438 | down | pterin-4 alpha-carbinolamine dehydratase/dimerizatio     |
| 8114326 | C5orf5        | -1.4881687 | down | chromosome 5 open reading frame 5                        |
| 8097704 | TMEM34        | -1.4889041 | down | transmembrane protein 34                                 |
| 8160332 | MLLT3         | -1.4890066 | down | myeloid/lymphoid or mixed-lineage leukemia (trithora     |
| 7988970 | KIAA1370      | -1.4890292 | down |                                                          |
| 7951672 | PIH1D2        | -1.4899294 | down | PIH1 domain containing 2                                 |
| 8130032 | FBXO30        | -1.4908626 | down | F-box protein 30                                         |
| 8012475 | MYH10         | -1.4909551 | down | myosin, heavy chain 10, non-muscle                       |
| 8113733 | CCDC100       | -1.4910212 | down | coiled-coil domain containing 100                        |
| 8127767 | ELOVL4        | -1.4913149 | down | elongation of very long chain fatty acids (FEN1/Elo2, SL |
| 8078380 | LOC344787     | -1.4926227 | down | similar to zinc finger protein 813                       |
| 7964868 | LOC100131613  | -1.4927669 | down | PRO1454                                                  |
| 7927062 | ZNF33A        | -1.4970798 | down | zinc finger protein 33A                                  |
| 8156581 | C9orf102      | -1.4971478 | down | chromosome 9 open reading frame 102                      |
| 8008646 | SCPEP1        | -1.4975375 | down | serine carboxypeptidase 1                                |
| 7902104 | PDE4B         | -1.4989545 | down | phosphodiesterase 4B, cAMP-specific (phosphodiester      |
| 8061305 | C20orf19      | -1.4995377 | down | chromosome 20 open reading frame 19                      |
| 7916789 | WDR78         | -1.4998413 | down | WD repeat domain 78                                      |
| 8151471 | MRPS28 TPD52  | -1.500143  | down | mitochondrial ribosomal protein S28   tumor protein C    |
| 8162147 | ZCCHC6        | -1.5006226 | down | zinc finger, CCHC domain containing 6                    |
| 8042356 | MEIS1         | -1.50126   | down | Meis homeobox 1                                          |
| 8027241 | ZNF253        | -1.5013075 | down | zinc finger protein 253                                  |
| 8080562 | IL17RB        | -1.5013299 | down | interleukin 17 receptor B                                |

Supplemental Table 1c  
eMSC vs. eSF

|         |               |            |      |                                                                    |
|---------|---------------|------------|------|--------------------------------------------------------------------|
| 7957793 | ACTR6         | -1.501689  | down | ARP6 actin-related protein 6 homolog (yeast)                       |
| 8126259 | C6orf130      | -1.5030485 | down | chromosome 6 open reading frame 130                                |
| 7932000 | KIN           | -1.5034581 | down |                                                                    |
| 7924351 | EPRS          | -1.5039093 | down | glutamyl-prolyl-tRNA synthetase                                    |
| 8127787 | IBTK          | -1.5045267 | down | inhibitor of Bruton agammaglobulinemia tyrosine kinase             |
| 8113773 | ALDH7A1       | -1.5050336 | down | aldehyde dehydrogenase 7 family, member A1                         |
| 7904853 | GPR89C GPR89A | -1.5051448 | down | G protein-coupled receptor 89C   G protein-coupled receptor 89A    |
| 7958346 | C12orf23      | -1.5056986 | down | chromosome 12 open reading frame 23                                |
| 8078014 | SLC6A6        | -1.505861  | down | solute carrier family 6 (neurotransmitter transporter, taurine)    |
| 7996198 | CCDC113       | -1.5064627 | down | coiled-coil domain containing 113                                  |
| 8091354 | HLTF          | -1.5074201 | down | helicase-like transcription factor                                 |
| 8108238 | SMAD5         | -1.5107737 | down | SMAD family member 5                                               |
| 8098084 | ETFDH         | -1.5110683 | down | electron-transferring-flavoprotein dehydrogenase                   |
| 8056257 | FAP           | -1.5121875 | down | fibroblast activation protein, alpha                               |
| 8112841 | HOMER1        | -1.5126535 | down | homer homolog 1 (Drosophila)                                       |
| 8112081 | DHX29         | -1.5128584 | down | DEAH (Asp-Glu-Ala-His) box polypeptide 29                          |
| 7974542 | C14orf101     | -1.5129092 | down | chromosome 14 open reading frame 101                               |
| 7967386 | MPHOSPH9      | -1.5129176 | down | M-phase phosphoprotein 9                                           |
| 8122202 | MYB           | -1.5133398 | down | v-myb myeloblastosis viral oncogene homolog (avian)                |
| 8098556 | CCDC111       | -1.5137573 | down | coiled-coil domain containing 111                                  |
| 8106602 | ZFYVE16       | -1.5137743 | down | zinc finger, FYVE domain containing 16                             |
| 7950544 | PRKRIR        | -1.5142708 | down | protein-kinase, interferon-inducible double stranded RNA dependent |
| 8147172 | CPNE3         | -1.5153732 | down | copine III                                                         |
| 7974316 | FRMD6         | -1.5153861 | down | FERM domain containing 6                                           |
| 7970546 | EFHA1         | -1.5163343 | down | EF-hand domain family, member A1                                   |
| 8168976 | GPRASP2       | -1.5165008 | down | G protein-coupled receptor associated sorting protein              |
| 8089299 | CD47          | -1.5174485 | down | CD47                                                               |
| 8120833 | SH3BGRL2      | -1.5175054 | down | SH3 domain binding glutamic acid-rich protein like 2               |
| 8014172 | CCT6B         | -1.5185297 | down | chaperonin containing TCP1, subunit 6B (zeta 2)                    |
| 8094456 | LOC389203     | -1.5186715 | down | hypothetical gene supported by BC032431                            |
| 7974799 | MNAT1         | -1.5190222 | down | menage a trois homolog 1, cyclin H assembly factor (Xenopus)       |
| 7907104 | IQWD1         | -1.5190907 | down | IQ motif and WD repeats 1                                          |
| 8140668 | SEMA3A        | -1.5192072 | down | sema domain, immunoglobulin domain (Ig), short basic               |

Supplemental Table 1c  
eMSC vs. eSF

|         |               |            |      |                                                                 |
|---------|---------------|------------|------|-----------------------------------------------------------------|
| 8102415 | CAMK2D        | -1.5199513 | down | calcium/calmodulin-dependent protein kinase (CaM ki             |
| 8127743 | HMGN3         | -1.5205274 | down | high mobility group nucleosomal binding domain 3                |
| 8144786 | SLC7A2        | -1.5206119 | down | solute carrier family 7 (cationic amino acid transporter        |
| 7983191 | ADAL          | -1.5209591 | down | adenosine deaminase-like                                        |
| 8178275 | ZNF311        | -1.5211201 | down | zinc finger protein 311                                         |
| 7976571 | C14orf129     | -1.5221581 | down | chromosome 14 open reading frame 129                            |
| 7917896 | ALG14         | -1.5224823 | down | asparagine-linked glycosylation 14 homolog ( <i>S. cerevisi</i> |
| 7971565 | P2RY5         | -1.5229462 | down | purinergic receptor P2Y, G-protein coupled, 5                   |
| 7917503 | GBP3          | -1.5231036 | down | guanylate binding protein 3                                     |
| 7967863 | ZNF605        | -1.5233438 | down | zinc finger protein 605                                         |
| 7917976 | SASS6         | -1.5239147 | down | spindle assembly 6 homolog ( <i>C. elegans</i> )                |
| 8096411 | TIGD2         | -1.5244933 | down | tigger transposable element derived 2                           |
| 8124622 | ZNF311        | -1.5252042 | down | zinc finger protein 311                                         |
| 8113981 | P4HA2         | -1.5257654 | down | procollagen-proline, 2-oxoglutarate 4-dioxygenase (pro          |
| 8173551 | PHKA1         | -1.5258486 | down | phosphorylase kinase, alpha 1 (muscle)                          |
| 8044278 | CCDC138       | -1.5263616 | down | coiled-coil domain containing 138                               |
| 8155734 | C9orf61       | -1.5281614 | down | chromosome 9 open reading frame 61                              |
| 8021966 | ENOSF1        | -1.5285763 | down | enolase superfamily member 1                                    |
| 8129649 | C6orf192      | -1.5307114 | down | chromosome 6 open reading frame 192                             |
| 8148124 | MTBP          | -1.530879  | down | Mdm2, transformed 3T3 cell double minute 2, p53 bin             |
| 7922598 | ANGPTL1       | -1.5312603 | down | angiopoietin-like 1                                             |
| 8052934 | MCEE          | -1.532787  | down | methylmalonyl CoA epimerase                                     |
| 7962185 | AMN1          | -1.5336196 | down | antagonist of mitotic exit network 1 homolog ( <i>S. cerevi</i> |
| 8156783 | COL15A1       | -1.5341902 | down | collagen, type XV, alpha 1                                      |
| 7901804 | INADL         | -1.5378401 | down | InaD-like ( <i>Drosophila</i> )                                 |
| 8108688 | PCDHB3        | -1.5381403 | down | protocadherin beta 3                                            |
| 8114193 | SAR1B         | -1.5388455 | down | SAR1 gene homolog B ( <i>S. cerevisiae</i> )                    |
| 8171708 | CXorf23       | -1.5390779 | down | chromosome X open reading frame 23                              |
| 8000013 | EXOD1 DCUN1D3 | -1.5393112 | down | exonuclease domain containing 1   DCN1, defective in            |
| 8112622 | GFM2          | -1.539664  | down | G elongation factor, mitochondrial 2                            |
| 8152703 | FBXO32        | -1.5401247 | down | F-box protein 32                                                |
| 7950731 | PRCP          | -1.5406445 | down | prolylcarboxypeptidase (angiotensinase C)                       |
| 8168855 | ARMCX4        | -1.5414732 | down | armadillo repeat containing, X-linked 4                         |

Supplemental Table 1c  
eMSC vs. eSF

|         |               |            |      |                                                         |
|---------|---------------|------------|------|---------------------------------------------------------|
| 8161945 | RASEF         | -1.541532  | down | RAS and EF-hand domain containing                       |
| 7948896 | SNORD22 SNHG1 | -1.5422262 | down | small nucleolar RNA, C/D box 22   small nucleolar RNA   |
| 8174779 | LAMP2         | -1.5426806 | down | lysosomal-associated membrane protein 2                 |
| 8109938 | RANBP17       | -1.5427408 | down | RAN binding protein 17                                  |
| 7965156 | LIN7A         | -1.5429394 | down | lin-7 homolog A (C. elegans)                            |
| 8166455 | PRDX4         | -1.5436784 | down | peroxiredoxin 4                                         |
| 7903281 | SLC35A3       | -1.5442758 | down | solute carrier family 35 (UDP-N-acetylglucosamine (UD   |
| 7914218 | TAF12         | -1.5446957 | down |                                                         |
| 8119898 | VEGFA         | -1.5447849 | down | vascular endothelial growth factor A                    |
| 8056408 | GALNT3        | -1.5449182 | down | UDP-N-acetyl-alpha-D-galactosamine:polypeptide N-ac     |
| 8122242 | PEX7          | -1.5450113 | down | peroxisomal biogenesis factor 7                         |
| 7965403 | LUM           | -1.5455178 | down | lumican                                                 |
| 8042468 | ANXA4         | -1.5476896 | down | annexin A4                                              |
| 7989069 | PYGO1         | -1.5482919 | down | pygopus homolog 1 (Drosophila)                          |
| 8137483 | FLJ16734      | -1.5486803 | down | hypothetical LOC641928                                  |
| 7968556 | KL            | -1.5496354 | down | klotho                                                  |
| 8116494 | ZFP62         | -1.550322  | down | zinc finger protein 62 homolog (mouse)                  |
| 8097066 | KIAA1627      | -1.5528752 | down |                                                         |
| 7931281 | FANK1         | -1.5534186 | down | fibronectin type III and ankyrin repeat domains 1       |
| 7939411 | C11orf74      | -1.5545939 | down | chromosome 11 open reading frame 74                     |
| 8127756 | LCA5          | -1.5547072 | down | Leber congenital amaurosis 5                            |
| 8155422 | CBWD5 CBWD2 C | -1.5565745 | down | COBW domain containing 5   COBW domain containin        |
| 8102232 | LEF1          | -1.5568664 | down | lymphoid enhancer-binding factor 1                      |
| 7965410 | DCN           | -1.5569361 | down | decorin                                                 |
| 8058462 | MDH1B         | -1.5575017 | down | malate dehydrogenase 1B, NAD (soluble)                  |
| 8097256 | FGF2          | -1.5577146 | down | fibroblast growth factor 2 (basic)                      |
| 8042310 | SLC1A4        | -1.5577699 | down | solute carrier family 1 (glutamate/neutral amino acid t |
| 8041519 | FAM82A        | -1.5578806 | down | family with sequence similarity 82, member A            |
| 8021275 | POLI          | -1.5587158 | down | polymerase (DNA directed) iota                          |
| 7964602 | LRIG3         | -1.5602441 | down | leucine-rich repeats and immunoglobulin-like domains    |
| 7901426 | ZFYVE9        | -1.5603764 | down | zinc finger, FYVE domain containing 9                   |
| 8151066 | ARMC1         | -1.5604278 | down | armadillo repeat containing 1                           |
| 8101260 | ANTXR2        | -1.5616726 | down | anthrax toxin receptor 2                                |

Supplemental Table 1c  
eMSC vs. eSF

|         |                 |            |      |                                                           |
|---------|-----------------|------------|------|-----------------------------------------------------------|
| 7986757 | NDN             | -1.562996  | down | necdin homolog (mouse)                                    |
| 7918759 | BCAS2 DENND2C   | -1.5631377 | down | breast carcinoma amplified sequence 2   DENN/MADD         |
| 8042259 | MDH1            | -1.5642657 | down | malate dehydrogenase 1, NAD (soluble)                     |
| 7932885 | ARHGAP12        | -1.5644273 | down | Rho GTPase activating protein 12                          |
| 8001197 | NETO2           | -1.5655229 | down | neuropilin (NRP) and tolloid (TLL)-like 2                 |
| 7936419 | C10orf118       | -1.5655321 | down | chromosome 10 open reading frame 118                      |
| 8033667 | ZNF558          | -1.5677869 | down | zinc finger protein 558                                   |
| 7991216 | DET1            | -1.5679959 | down | de-etiolated homolog 1 (Arabidopsis)                      |
| 8122038 | TMEM200A        | -1.5681921 | down | transmembrane protein 200A                                |
| 7980908 | FBLN5           | -1.5689859 | down | fibulin 5                                                 |
| 8156919 | MURC            | -1.5691158 | down | muscle-restricted coiled-coil protein                     |
| 8028194 | ZNF382          | -1.5691983 | down | zinc finger protein 382                                   |
| 8140971 | SAMD9L          | -1.5704027 | down | sterile alpha motif domain containing 9-like              |
| 7950641 | KCTD14          | -1.5714226 | down | potassium channel tetramerisation domain containing       |
| 7986350 | ARRDC4          | -1.5729293 | down | arrestin domain containing 4                              |
| 7983843 | TCF12           | -1.5738292 | down | transcription factor 12 (HTF4, helix-loop-helix transcrip |
| 8116402 | MAPK9           | -1.5742433 | down | mitogen-activated protein kinase 9                        |
| 8176174 | MPP1            | -1.5745857 | down | membrane protein, palmitoylated 1, 55kDa                  |
| 7980246 | MLH3            | -1.5746665 | down | mutL homolog 3 (E. coli)                                  |
| 8116867 | TMEM14B         | -1.5754601 | down | transmembrane protein 14B                                 |
| 8094342 | C4orf28         | -1.5760298 | down | chromosome 4 open reading frame 28                        |
| 7949931 | SUV420H1        | -1.5760835 | down | suppressor of variegation 4-20 homolog 1 (Drosophila)     |
| 8052626 | VPS54           | -1.5767558 | down | vacuolar protein sorting 54 homolog (S. cerevisiae)       |
| 7939341 | CD44            | -1.5782498 | down |                                                           |
| 7974771 | C14orf135 LOC10 | -1.5799077 | down | chromosome 14 open reading frame 135   hypothetical       |
| 7943231 | ANKRD49         | -1.5799383 | down | ankyrin repeat domain 49                                  |
| 7932744 | ARMC4           | -1.5806359 | down | armadillo repeat containing 4                             |
| 7972336 | DZIP1           | -1.5814859 | down | DAZ interacting protein 1                                 |
| 8120222 | EFHC1           | -1.5822091 | down | EF-hand domain (C-terminal) containing 1                  |
| 8129706 | HBS1L           | -1.5830183 | down | HBS1-like (S. cerevisiae)                                 |
| 8161839 | C9orf95         | -1.5842971 | down | chromosome 9 open reading frame 95                        |
| 8058147 | PPIL3           | -1.5845476 | down | peptidylprolyl isomerase (cyclophilin)-like 3             |
| 7965486 | CCDC41          | -1.5850966 | down | coiled-coil domain containing 41                          |

Supplemental Table 1c  
eMSC vs. eSF

|         |              |            |      |                                                        |
|---------|--------------|------------|------|--------------------------------------------------------|
| 8023727 | DSEL         | -1.5856217 | down | dermatan sulfate epimerase-like                        |
| 8151942 | HRSP12       | -1.5857962 | down | heat-responsive protein 12                             |
| 8085815 | TOP2B        | -1.5882039 | down | topoisomerase (DNA) II beta 180kDa                     |
| 8168580 | APOOL        | -1.5887117 | down | apolipoprotein O-like                                  |
| 8157021 | NIPSNAP3A    | -1.5889505 | down | nipsnap homolog 3A (C. elegans)                        |
| 8101624 | KLHL8        | -1.5893319 | down | kelch-like 8 (Drosophila)                              |
| 7974781 | PPM1A        | -1.5916457 | down | protein phosphatase 1A (formerly 2C), magnesium-dep    |
| 8175076 | ZNF280C      | -1.591985  | down | zinc finger protein 280C                               |
| 8121461 | CDC40        | -1.592228  | down | cell division cycle 40 homolog (S. cerevisiae)         |
| 7965855 | NUP37        | -1.5924133 | down | nucleoporin 37kDa                                      |
| 8046020 | SCN2A        | -1.5932195 | down | sodium channel, voltage-gated, type II, alpha subunit  |
| 8002446 | HYDIN HYDIN2 | -1.5932844 | down | hydrocephalus inducing homolog (mouse)   hydroceph     |
| 8083978 | NAALADL2     | -1.5937189 | down | N-acetylated alpha-linked acidic dipeptidase-like 2    |
| 8060988 | BTBD3        | -1.5950534 | down | BTB (POZ) domain containing 3                          |
| 8097717 | ARHGAP10     | -1.595486  | down | Rho GTPase activating protein 10                       |
| 8096109 | MRPS18C      | -1.5973694 | down | mitochondrial ribosomal protein S18C                   |
| 7950796 | CREBZF       | -1.597848  | down | CREB/ATF bZIP transcription factor                     |
| 7902541 | IFI44L       | -1.597888  | down | interferon-induced protein 44-like                     |
| 7979906 | C14orf112    | -1.5988823 | down | chromosome 14 open reading frame 112                   |
| 8090577 | MBD4         | -1.5996836 | down | methyl-CpG binding domain protein 4                    |
| 8138912 | LSM5         | -1.6006461 | down |                                                        |
| 8102249 | AGXT2L1      | -1.6008227 | down | alanine-glyoxylate aminotransferase 2-like 1           |
| 8092009 | LRRC34       | -1.6009487 | down | leucine rich repeat containing 34                      |
| 8142415 | FLJ31818     | -1.6009897 | down |                                                        |
| 7919815 | CTSK         | -1.6019467 | down | cathepsin K                                            |
| 8048835 | C2orf33      | -1.6019949 | down | chromosome 2 open reading frame 33                     |
| 7985089 | RCN2         | -1.6020317 | down | reticulocalbin 2, EF-hand calcium binding domain       |
| 7926609 | BMI1         | -1.6020659 | down |                                                        |
| 8069744 | RWDD2B       | -1.6021618 | down | RWD domain containing 2B                               |
| 7990810 | MTHFS ST20   | -1.6025805 | down | 5,10-methenyltetrahydrofolate synthetase (5-formylte   |
| 8073015 | KDELR3       | -1.6029493 | down | KDEL (Lys-Asp-Glu-Leu) endoplasmic reticulum protein   |
| 8168589 | ZNF711       | -1.6032984 | down | zinc finger protein 711                                |
| 8155673 | PIP5K1B      | -1.6039761 | down | phosphatidylinositol-4-phosphate 5-kinase, type I, bet |

Supplemental Table 1c  
eMSC vs. eSF

|         |                 |            |      |                                                               |
|---------|-----------------|------------|------|---------------------------------------------------------------|
| 8065566 | DEFB124         | -1.6050211 | down | defensin, beta 124                                            |
| 8112439 | CCDC125         | -1.605115  | down | coiled-coil domain containing 125                             |
| 8173917 | NAP1L3          | -1.6055083 | down | nucleosome assembly protein 1-like 3                          |
| 8156601 | C9orf102        | -1.6055546 | down | chromosome 9 open reading frame 102                           |
| 8099524 | LDB2            | -1.6060039 | down | LIM domain binding 2                                          |
| 8156160 | LOC100129901    | -1.6060578 | down | similar to KIF27B                                             |
| 8103289 | PLRG1           | -1.6064636 | down | pleiotropic regulator 1 (PRL1 homolog, Arabidopsis)           |
| 8065248 | LOC100130264    | -1.6071815 | down | similar to hCG2038397                                         |
| 8122843 | ESR1            | -1.607868  | down | estrogen receptor 1                                           |
| 8120165 | CENPQ           | -1.6079777 | down | centromere protein Q                                          |
| 8173059 | WNK3            | -1.6087321 | down | WNK lysine deficient protein kinase 3                         |
| 8130422 | CNKSR3          | -1.6088166 | down | CNKSR family member 3                                         |
| 8141024 | BET1            | -1.609102  | down | blocked early in transport 1 homolog ( <i>S. cerevisiae</i> ) |
| 7915870 | ATPAF1          | -1.6096023 | down | ATP synthase mitochondrial F1 complex assembly factor         |
| 8140170 | GTF2IRD2 GTF2IR | -1.6105119 | down | GTF2I repeat domain containing 2   GTF2I repeat domain        |
| 8162586 | SLC35D2         | -1.6108234 | down | solute carrier family 35, member D2                           |
| 8108724 | PCDHB10         | -1.6109524 | down | protocadherin beta 10                                         |
| 8090133 | CCDC14          | -1.6117724 | down | coiled-coil domain containing 14                              |
| 7929816 | SCD             | -1.6126927 | down | stearoyl-CoA desaturase (delta-9-desaturase)                  |
| 8094476 | TBC1D19         | -1.6134588 | down | TBC1 domain family, member 19                                 |
| 8175755 | CETN2           | -1.6135046 | down | centrin, EF-hand protein, 2                                   |
| 7917482 | CCBL2           | -1.6141099 | down | cysteine conjugate-beta lyase 2                               |
| 7943498 | DYNC2H1         | -1.6141503 | down | dynein, cytoplasmic 2, heavy chain 1                          |
| 7989315 | GTF2A2          | -1.6147581 | down | general transcription factor IIA, 2, 12kDa                    |
| 7948900 | SNORD30         | -1.6153042 | down | small nucleolar RNA, C/D box 30                               |
| 8021496 | KIAA1468        | -1.6154156 | down |                                                               |
| 8163839 | C5              | -1.6167551 | down | complement component 5                                        |
| 7954613 | CCDC91          | -1.617641  | down | coiled-coil domain containing 91                              |
| 7908988 | SNRPE           | -1.6177547 | down | small nuclear ribonucleoprotein polypeptide E                 |
| 8100298 | OCIAD2          | -1.617899  | down | OCIA domain containing 2                                      |
| 7926916 | ZEB1            | -1.6182947 | down | zinc finger E-box binding homeobox 1                          |
| 8102342 | ELOVL6          | -1.6191603 | down | ELOVL family member 6, elongation of long chain fatty         |
| 8098344 | NBLA00301       | -1.6197239 | down | Nbla00301                                                     |

Supplemental Table 1c  
eMSC vs. eSF

|         |                 |            |      |                                                                |
|---------|-----------------|------------|------|----------------------------------------------------------------|
| 8080781 | PXK             | -1.6210932 | down | PX domain containing serine/threonine kinase                   |
| 8112388 | TRIM23          | -1.6223167 | down | tripartite motif-containing 23                                 |
| 7975136 | FUT8            | -1.6223449 | down | fucosyltransferase 8 (alpha (1,6) fucosyltransferase)          |
| 8020267 | CEP192          | -1.6223944 | down | centrosomal protein 192kDa                                     |
| 7943803 | DIXDC1          | -1.6230975 | down | DIX domain containing 1                                        |
| 8130664 | C6orf118        | -1.6236572 | down | chromosome 6 open reading frame 118                            |
| 7936408 | DCLRE1A         | -1.6244687 | down | DNA cross-link repair 1A (PSO2 homolog, <i>S. cerevisiae</i> ) |
| 8127872 | SNAP91          | -1.6249092 | down | synaptosomal-associated protein, 91kDa homolog (mo             |
| 8155864 | RORB            | -1.6250852 | down | RAR-related orphan receptor B                                  |
| 7932285 | C10orf97        | -1.6252877 | down | chromosome 10 open reading frame 97                            |
| 8114006 | FLJ44796        | -1.6268475 | down |                                                                |
| 8063444 | TSHZ2           | -1.6272953 | down | teashirt zinc finger homeobox 2                                |
| 8133258 | WBSCR17         | -1.6280159 | down | Williams-Beuren syndrome chromosome region 17                  |
| 8021470 | PMAIP1          | -1.6286886 | down | phorbol-12-myristate-13-acetate-induced protein 1              |
| 8056217 | MXRA7           | -1.6296337 | down | matrix-remodelling associated 7                                |
| 8067305 | SYCP2           | -1.629786  | down | synaptonemal complex protein 2                                 |
| 8009255 | CCDC45          | -1.6313971 | down | coiled-coil domain containing 45                               |
| 8050608 | C2orf43         | -1.6316285 | down | chromosome 2 open reading frame 43                             |
| 8042402 | C2orf13 PROKR1  | -1.6316448 | down | chromosome 2 open reading frame 13   prokineticin re           |
| 8103834 | AGA             | -1.6317315 | down | aspartylglucosaminidase                                        |
| 7971335 | CCDC122         | -1.6325232 | down | coiled-coil domain containing 122                              |
| 8094134 | DUB4            | -1.6334666 | down |                                                                |
| 7936346 | ZDHHC6          | -1.6334732 | down | zinc finger, DHHC-type containing 6                            |
| 7918457 | KCNA3           | -1.6344477 | down | potassium voltage-gated channel, shaker-related subfa          |
| 7930614 | NHLRC2          | -1.635246  | down | NHL repeat containing 2                                        |
| 8172043 | SRPX            | -1.6353998 | down | sushi-repeat-containing protein, X-linked                      |
| 7944656 | SC5DL           | -1.6358224 | down | sterol-C5-desaturase (ERG3 delta-5-desaturase homolo           |
| 7939158 | QSER1           | -1.6367818 | down | glutamine and serine rich 1                                    |
| 8088247 | ARHGEF3         | -1.6367948 | down | Rho guanine nucleotide exchange factor (GEF) 3                 |
| 8152453 | TRPS1           | -1.637631  | down | trichorhinophalangeal syndrome I                               |
| 8008113 | CALCOCO2        | -1.6377095 | down | calcium binding and coiled-coil domain 2                       |
| 8001149 | VPS35           | -1.6382006 | down | vacuolar protein sorting 35 homolog ( <i>S. cerevisiae</i> )   |
| 8133549 | GTF2IRD2 GTF2IR | -1.6398258 | down | GTF2I repeat domain containing 2   GTF2I repeat domi           |



Supplemental Table 1c  
eMSC vs. eSF

|         |                  |            |      |                                                       |
|---------|------------------|------------|------|-------------------------------------------------------|
| 8147837 | ZFPM2            | -1.6400259 | down | zinc finger protein, multitype 2                      |
| 7918255 | CLCC1            | -1.6405592 | down | chloride channel CLIC-like 1                          |
| 8017736 | CCDC46           | -1.6421964 | down | coiled-coil domain containing 46                      |
| 7958620 | IFT81            | -1.642314  | down | intraflagellar transport 81 homolog (Chlamydomonas)   |
| 8101489 | CCDC98           | -1.6426896 | down | coiled-coil domain containing 98                      |
| 7960383 | PARP11           | -1.6427904 | down | poly (ADP-ribose) polymerase family, member 11        |
| 7897378 | PER3             | -1.6455582 | down | period homolog 3 (Drosophila)                         |
| 8121429 | FIG4             | -1.6477137 | down |                                                       |
| 8041867 | MSH2             | -1.648591  | down | mutS homolog 2, colon cancer, nonpolyposis type 1 (E. |
| 8100382 | CHIC2            | -1.6488861 | down | cysteine-rich hydrophobic domain 2                    |
| 8161575 | CBWD5   CBWD3    | -1.6491047 | down | COBW domain containing 5   COBW domain containi       |
| 8091446 | PFN2             | -1.651135  | down | profilin 2                                            |
| 8031640 | ZNF583           | -1.6514444 | down | zinc finger protein 583                               |
| 7923131 | DENND1B   C1orf2 | -1.6518928 | down | DENN/MADD domain containing 1B   chromosome 1 c       |
| 7956522 | KIF5A            | -1.6519381 | down | kinesin family member 5A                              |
| 7961767 | KIAA0528         | -1.6526507 | down |                                                       |
| 8130102 | KATNA1           | -1.6532524 | down | katanin p60 (ATPase-containing) subunit A 1           |
| 8095894 | MRPL1            | -1.6539545 | down | mitochondrial ribosomal protein L1                    |
| 7902810 | LMO4             | -1.6541767 | down | LIM domain only 4                                     |
| 8100870 | ADAMTS3          | -1.6568966 | down | ADAM metalloproteinase with thrombospondin type 1     |
| 8034342 | ZNF625   ZNF20   | -1.6591458 | down | zinc finger protein 625   zinc finger protein 20      |
| 7965956 | NFYB             | -1.659148  | down | nuclear transcription factor Y, beta                  |
| 8056285 | IFIH1            | -1.6592818 | down | interferon induced with helicase C domain 1           |
| 7901895 | ATG4C            | -1.6597952 | down | ATG4 autophagy related 4 homolog C (S. cerevisiae)    |
| 7913582 | ZNF436           | -1.6604872 | down | zinc finger protein 436                               |
| 8140500 | TMEM60           | -1.6605773 | down | transmembrane protein 60                              |
| 8087985 | GLT8D1           | -1.660992  | down | glycosyltransferase 8 domain containing 1             |
| 8165486 | TMEM203   LOC65  | -1.6617258 | down | transmembrane protein 203   hypothetical LOC653383    |
| 8127841 | PGM3             | -1.6626761 | down | phosphoglucomutase 3                                  |
| 7968711 | COG6             | -1.663351  | down | component of oligomeric golgi complex 6               |
| 8111129 | ZNF622           | -1.6647754 | down | zinc finger protein 622                               |
| 8108217 | TGFBI            | -1.6667819 | down | transforming growth factor, beta-induced, 68kDa       |
| 8091737 | IFT80            | -1.6669492 | down | intraflagellar transport 80 homolog (Chlamydomonas)   |

Supplemental Table 1c  
eMSC vs. eSF

|         |             |            |      |                                                                         |
|---------|-------------|------------|------|-------------------------------------------------------------------------|
| 8106702 | ZCCHC9      | -1.667266  | down | zinc finger, CCHC domain containing 9                                   |
| 8068024 | JAM2        | -1.6697478 | down | junctional adhesion molecule 2                                          |
| 7943442 | DYNC2H1     | -1.6700706 | down | dynein, cytoplasmic 2, heavy chain 1                                    |
| 8038967 | ZNF83       | -1.670542  | down | zinc finger protein 83                                                  |
| 8040163 | IAH1        | -1.6714059 | down | isoamyl acetate-hydrolyzing esterase 1 homolog ( <i>S. cerevisiae</i> ) |
| 7936673 | RGS10       | -1.6716824 | down | regulator of G-protein signaling 10                                     |
| 7957386 | ACSS3       | -1.6719587 | down | acyl-CoA synthetase short-chain family member 3                         |
| 8144742 | EFHA2       | -1.6721917 | down | EF-hand domain family, member A2                                        |
| 8139198 | RWDD4A      | -1.6727659 | down | RWD domain containing 4A                                                |
| 8124502 | ZNF184      | -1.673595  | down | zinc finger protein 184                                                 |
| 8162533 | PTCH1       | -1.6738174 | down | patched homolog 1 ( <i>Drosophila</i> )                                 |
| 8147313 | TMEM67      | -1.674523  | down | transmembrane protein 67                                                |
| 7934334 | TTC18       | -1.674913  | down | tetratricopeptide repeat domain 18                                      |
| 8112967 | TMEM167     | -1.6750928 | down | transmembrane protein 167                                               |
| 7942957 | PRSS23      | -1.6760192 | down | protease, serine, 23                                                    |
| 8050507 | WDR35       | -1.6761388 | down | WD repeat domain 35                                                     |
| 8085954 | AZI2        | -1.6768174 | down | 5-azacytidine induced 2                                                 |
| 8112121 | SLC38A9     | -1.6774508 | down | solute carrier family 38, member 9                                      |
| 8008564 | OK/KNS-CL.3 | -1.6795447 | down |                                                                         |
| 8062748 | IFT52       | -1.6797383 | down | intraflagellar transport 52 homolog ( <i>Chlamydomonas</i> )            |
| 8105778 | PIK3R1      | -1.6806723 | down | phosphoinositide-3-kinase, regulatory subunit 1 (alpha)                 |
| 8051928 | PREPL       | -1.6816901 | down | prolyl endopeptidase-like                                               |
| 7943620 | ATM NPAT    | -1.6824838 | down | ataxia telangiectasia mutated   nuclear protein, ataxia-                |
| 8177628 | CCDC125     | -1.6846635 | down | coiled-coil domain containing 125                                       |
| 8131479 | FLJ20323    | -1.685112  | down |                                                                         |
| 8097529 | ELMOD2      | -1.6855313 | down | ELMO/CED-12 domain containing 2                                         |
| 7947363 | WT1         | -1.6857014 | down | Wilms tumor 1                                                           |
| 8055445 | DARS        | -1.6863666 | down | aspartyl-tRNA synthetase                                                |
| 7910680 | GPR137B     | -1.687347  | down | G protein-coupled receptor 137B                                         |
| 8131600 | TSPAN13     | -1.688893  | down | tetraspanin 13                                                          |
| 7989023 | RAB27A      | -1.6893039 | down |                                                                         |
| 8030908 | ZNF480      | -1.6894664 | down | zinc finger protein 480                                                 |
| 8046895 | KIAA1946    | -1.6901152 | down |                                                                         |

Supplemental Table 1c  
eMSC vs. eSF

|         |                |            |      |                                                            |
|---------|----------------|------------|------|------------------------------------------------------------|
| 8175432 | SNORD61        | -1.6912977 | down | small nucleolar RNA, C/D box 61                            |
| 7962112 | CAPRIN2        | -1.6915087 | down | caprin family member 2                                     |
| 8107119 | TMEM157        | -1.6917092 | down | transmembrane protein 157                                  |
| 8042223 | EHBP1          | -1.691839  | down | EH domain binding protein 1                                |
| 7942830 | LOC100130425 G | -1.691872  | down | hypothetical protein LOC100130425   GCRG-P224              |
| 8122409 | PEX3           | -1.6932428 | down | peroxisomal biogenesis factor 3                            |
| 7951408 | COP1           | -1.693726  | down | caspase-1 dominant-negative inhibitor pseudo-ICE           |
| 7930927 | INPP5F         | -1.6980906 | down | inositol polyphosphate-5-phosphatase F                     |
| 7962327 | SLC2A13        | -1.699455  | down | solute carrier family 2 (facilitated glucose transporter), |
| 7968516 | PDS5B          | -1.7006209 | down | PDS5, regulator of cohesion maintenance, homolog B (       |
| 7922137 | NME7           | -1.7008481 | down | non-metastatic cells 7, protein expressed in (nucleosid    |
| 7923119 | ZBTB41         | -1.7010677 | down | zinc finger and BTB domain containing 41                   |
| 8094778 | UCHL1          | -1.7023894 | down | ubiquitin carboxyl-terminal esterase L1 (ubiquitin thiol   |
| 8130720 | SFT2D1         | -1.704757  | down | SFT2 domain containing 1                                   |
| 7918034 | DPH5           | -1.7049887 | down |                                                            |
| 8045736 | FMNL2          | -1.705456  | down | formin-like 2                                              |
| 7901460 | GPX7           | -1.7067983 | down | glutathione peroxidase 7                                   |
| 7973918 | C14orf24       | -1.7077295 | down | chromosome 14 open reading frame 24                        |
| 8157976 | GARNL3         | -1.7079167 | down | GTPase activating Rap/RanGAP domain-like 3                 |
| 8006345 | RHOT1          | -1.7081544 | down | ras homolog gene family, member T1                         |
| 7927786 | REEP3          | -1.7092034 | down | receptor accessory protein 3                               |
| 8107942 | RAD50          | -1.7096817 | down |                                                            |
| 8168749 | SRPX2          | -1.7102072 | down | sushi-repeat-containing protein, X-linked 2                |
| 8159850 | FLJ35024       | -1.7130233 | down | hypothetical LOC401491                                     |
| 7976084 | SPATA7         | -1.7135618 | down | spermatogenesis associated 7                               |
| 8146024 | ADAM32         | -1.7152684 | down | ADAM metallopeptidase domain 32                            |
| 8023191 | SMAD2          | -1.7168537 | down | SMAD family member 2                                       |
| 8106516 | JMY            | -1.7191856 | down | junction-mediating and regulatory protein                  |
| 7918026 | EXTL2          | -1.7192307 | down | exostoses (multiple)-like 2                                |
| 8105111 | FBXO4          | -1.7200513 | down | F-box protein 4                                            |
| 7910591 | C1orf57        | -1.7204006 | down | chromosome 1 open reading frame 57                         |
| 8128726 | PPIL6          | -1.7206413 | down | peptidylprolyl isomerase (cyclophilin)-like 6              |
| 8048081 | SPAG16         | -1.7222686 | down | sperm associated antigen 16                                |

Supplemental Table 1c  
eMSC vs. eSF

|         |               |            |      |                                                          |
|---------|---------------|------------|------|----------------------------------------------------------|
| 8082643 | NEK11         | -1.7240778 | down | NIMA (never in mitosis gene a)- related kinase 11        |
| 7958158 | HCFC2         | -1.7246363 | down | host cell factor C2                                      |
| 8122317 | HEBP2         | -1.724993  | down | heme binding protein 2                                   |
| 8123695 | PECI          | -1.7261373 | down | peroxisomal D3,D2-enoyl-CoA isomerase                    |
| 8120378 | KIAA1586      | -1.7266681 | down |                                                          |
| 8155460 | CNTNAP3 CNTNA | -1.7273395 | down | contactin associated protein-like 3   contactin associat |
| 8129974 | FUCA2         | -1.727842  | down | fucosidase, alpha-L- 2, plasma                           |
| 7902553 | IFI44         | -1.7282678 | down | interferon-induced protein 44                            |
| 8166243 | REPS2         | -1.7283487 | down | RALBP1 associated Eps domain containing 2                |
| 8135235 | PMPCB         | -1.7284749 | down | peptidase (mitochondrial processing) beta                |
| 8042737 | ALMS1         | -1.7288712 | down | Alstrom syndrome 1                                       |
| 7956488 | KIF5A         | -1.7311764 | down | kinesin family member 5A                                 |
| 8121734 | ASF1A         | -1.7313331 | down | ASF1 anti-silencing function 1 homolog A (S. cerevisiae  |
| 8095760 | THAP6         | -1.7315409 | down | THAP domain containing 6                                 |
| 8129273 | C6orf170      | -1.7321315 | down | chromosome 6 open reading frame 170                      |
| 7968577 | NBEA          | -1.7341967 | down | neurobeachin                                             |
| 8174119 | ZMAT1         | -1.7343245 | down | zinc finger, matrin type 1                               |
| 8094719 | N4BP2         | -1.735877  | down | NEDD4 binding protein 2                                  |
| 7973840 | ARHGAP5       | -1.736843  | down | Rho GTPase activating protein 5                          |
| 7987145 | FMN1          | -1.7372627 | down | formin 1                                                 |
| 8174201 | BEX1          | -1.7373329 | down | brain expressed, X-linked 1                              |
| 8073799 | ATXN10        | -1.7376318 | down | ataxin 10                                                |
| 8174610 | LRCH2         | -1.7379047 | down | leucine-rich repeats and calponin homology (CH) doma     |
| 8090988 | CEP70         | -1.7382975 | down | centrosomal protein 70kDa                                |
| 7919780 | GOLPH3L       | -1.7390362 | down | golgi phosphoprotein 3-like                              |
| 8152222 | AZIN1         | -1.7406621 | down | antizyme inhibitor 1                                     |
| 7902977 | KIAA1107      | -1.7410856 | down |                                                          |
| 8098006 | GLRB          | -1.7419704 | down | glycine receptor, beta                                   |
| 8027312 | ZNF429        | -1.7421933 | down | zinc finger protein 429                                  |
| 8081055 | CHMP2B        | -1.7422941 | down | chromatin modifying protein 2B                           |
| 8038655 | KLK4          | -1.7427055 | down | kallikrein-related peptidase 4                           |
| 8057821 | DNAH7         | -1.7428436 | down | dynein, axonemal, heavy chain 7                          |
| 8147030 | STMN2         | -1.74431   | down | stathmin-like 2                                          |

Supplemental Table 1c  
eMSC vs. eSF

|         |              |            |      |                                                           |
|---------|--------------|------------|------|-----------------------------------------------------------|
| 7900555 | RP4-692D3.1  | -1.7458683 | down | hypothetical protein LOC728621                            |
| 7902660 | WDR63        | -1.7468843 | down | WD repeat domain 63                                       |
| 8171561 | SCML2        | -1.7474759 | down | sex comb on midleg-like 2 (Drosophila)                    |
| 7946439 | TMEM9B       | -1.7498833 | down | TMEM9 domain family, member B                             |
| 7974587 | ACTR10       | -1.750395  | down | actin-related protein 10 homolog (S. cerevisiae)          |
| 7903239 | AGL          | -1.7507683 | down | amylo-1, 6-glucosidase, 4-alpha-glucanotransferase (gl    |
| 8121895 | TRMT11       | -1.7509094 | down | tRNA methyltransferase 11 homolog (S. cerevisiae)         |
| 8147156 | WWP1         | -1.7513005 | down | WW domain containing E3 ubiquitin protein ligase 1        |
| 8093191 | DLG1         | -1.7514851 | down | discs, large homolog 1 (Drosophila)                       |
| 8041257 | SLC30A6      | -1.7523648 | down | solute carrier family 30 (zinc transporter), member 6     |
| 7969228 | ALG11 UTP14C | -1.7534826 | down | asparagine-linked glycosylation 11 homolog (S. cerevisi   |
| 8079198 | ZNF660       | -1.7539084 | down | zinc finger protein 660                                   |
| 7940775 | RARRES3      | -1.7548462 | down | retinoic acid receptor responder (tazarotene induced)     |
| 8091306 | PLSCR4       | -1.7549807 | down | phospholipid scramblase 4                                 |
| 7915286 | PPT1         | -1.7551259 | down | palmitoyl-protein thioesterase 1 (ceroid-lipofuscinosis,  |
| 8046628 | RBM45        | -1.755147  | down | RNA binding motif protein 45                              |
| 7944667 | SORL1        | -1.758937  | down | sortilin-related receptor, L(DLR class) A repeats-contair |
| 8078962 | EIF1B        | -1.7626078 | down | eukaryotic translation initiation factor 1B               |
| 7929012 | STAMBPL1     | -1.7634155 | down | STAM binding protein-like 1                               |
| 7936567 | RAB11FIP2    | -1.7645977 | down | RAB11 family interacting protein 2 (class I)              |
| 8120239 | TMEM14A      | -1.7654653 | down | transmembrane protein 14A                                 |
| 7944751 | C11orf63     | -1.7659746 | down | chromosome 11 open reading frame 63                       |
| 7907171 | BLZF1        | -1.7678186 | down | basic leucine zipper nuclear factor 1 (JEM-1)             |
| 8148059 | DEPDC6       | -1.7691463 | down | DEP domain containing 6                                   |
| 8127903 | KIAA1009     | -1.7712104 | down |                                                           |
| 8108693 | PCDHB4       | -1.7718077 | down | protocadherin beta 4                                      |
| 8102938 | RNF150       | -1.7731825 | down | ring finger protein 150                                   |
| 8051963 | SRBD1        | -1.7731867 | down | S1 RNA binding domain 1                                   |
| 8151768 | RUNX1T1      | -1.7741407 | down | runt-related transcription factor 1; translocated to, 1 ( |
| 8169186 | TBC1D8B      | -1.7748243 | down | TBC1 domain family, member 8B (with GRAM domain)          |
| 8046502 | SCRN3        | -1.7752714 | down | secernin 3                                                |
| 8047577 | ALS2CR8      | -1.7756617 | down | amyotrophic lateral sclerosis 2 (juvenile) chromosome     |
| 8057045 | FKBP7        | -1.7757622 | down | FK506 binding protein 7                                   |

Supplemental Table 1c  
eMSC vs. eSF

|         |                 |            |      |                                                          |
|---------|-----------------|------------|------|----------------------------------------------------------|
| 7946288 | ZNF214          | -1.7760806 | down | zinc finger protein 214                                  |
| 7930454 | PDCD4           | -1.7768835 | down | programmed cell death 4 (neoplastic transformation in    |
| 7936201 | C10orf79        | -1.777726  | down | chromosome 10 open reading frame 79                      |
| 8067932 | C21orf34        | -1.7792534 | down | chromosome 21 open reading frame 34                      |
| 8103881 | RWDD4A          | -1.7801113 | down | RWD domain containing 4A                                 |
| 8092134 | PLD1            | -1.7805501 | down | phospholipase D1, phosphatidylcholine-specific           |
| 8156164 | LOC389765       | -1.7808619 | down | similar to KIF27C                                        |
| 8015349 | KRT19           | -1.7811311 | down | keratin 19                                               |
| 8106252 | HEXB            | -1.7812723 | down | hexosaminidase B (beta polypeptide)                      |
| 8041967 | C2orf30         | -1.7814752 | down | chromosome 2 open reading frame 30                       |
| 7972713 | EFNB2           | -1.7834342 | down | ephrin-B2                                                |
| 8035842 | ZNF91           | -1.7838113 | down | zinc finger protein 91                                   |
| 8104321 | ADAMTS16        | -1.7842075 | down | ADAM metalloproteinase with thrombospondin type 1        |
| 7987361 | ZNF770          | -1.7845427 | down | zinc finger protein 770                                  |
| 7934278 | P4HA1           | -1.7869198 | down | procollagen-proline, 2-oxoglutarate 4-dioxygenase (pro   |
| 8161288 | CNTNAP3   CNTNA | -1.7873373 | down | contactin associated protein-like 3   contactin associat |
| 8152280 | LRP12           | -1.7881595 | down | low density lipoprotein-related protein 12               |
| 8113717 | MGC32805        | -1.7885945 | down |                                                          |
| 8117054 | CAP2            | -1.7889225 | down | CAP, adenylate cyclase-associated protein, 2 (yeast)     |
| 8129181 | GOPC   ROS1     | -1.7919991 | down | golgi associated PDZ and coiled-coil motif containing    |
| 8150908 | IMPAD1          | -1.7948045 | down | inositol monophosphatase domain containing 1             |
| 8113097 | KIAA0825        | -1.7957158 | down |                                                          |
| 8149551 | PSD3            | -1.7961006 | down | pleckstrin and Sec7 domain containing 3                  |
| 8058161 | ORC2L           | -1.7966342 | down | origin recognition complex, subunit 2-like (yeast)       |
| 8163109 | C9orf4          | -1.7986205 | down | chromosome 9 open reading frame 4                        |
| 8147580 | VPS13B          | -1.8000036 | down | vacuolar protein sorting 13 homolog B (yeast)            |
| 7990700 | WDR61           | -1.8005174 | down | WD repeat domain 61                                      |
| 8120468 | BAI3            | -1.8024827 | down | brain-specific angiogenesis inhibitor 3                  |
| 7962058 | TMTC1           | -1.8039742 | down | transmembrane and tetratricopeptide repeat containir     |
| 8160040 | PTPRD           | -1.8042555 | down | protein tyrosine phosphatase, receptor type, D           |
| 8121161 | KIAA0776        | -1.8055143 | down |                                                          |
| 7989037 | CCPG1           | -1.8063515 | down | cell cycle progression 1                                 |
| 8149500 | MTUS1           | -1.8073988 | down | mitochondrial tumor suppressor 1                         |

Supplemental Table 1c  
eMSC vs. eSF

|         |                   |            |      |                                                                   |
|---------|-------------------|------------|------|-------------------------------------------------------------------|
| 8068612 | WRB               | -1.8078679 | down | tryptophan rich basic protein                                     |
| 8129231 | C6orf60           | -1.8087298 | down | chromosome 6 open reading frame 60                                |
| 8132369 | EPDR1             | -1.810229  | down | ependymin related protein 1 (zebrafish)                           |
| 8173414 | SLC7A3            | -1.8112093 | down | solute carrier family 7 (cationic amino acid transporter)         |
| 7916356 | C1orf41           | -1.8115413 | down | chromosome 1 open reading frame 41                                |
| 8121002 | C6orf162          | -1.8129759 | down | chromosome 6 open reading frame 162                               |
| 8148070 | COL14A1           | -1.8134013 | down | collagen, type XIV, alpha 1                                       |
| 8139228 | C7orf25           | -1.8148613 | down | chromosome 7 open reading frame 25                                |
| 8037430 | ZNF404            | -1.814923  | down | zinc finger protein 404                                           |
| 8144726 | TUSC3             | -1.8150952 | down | tumor suppressor candidate 3                                      |
| 8140620 | PCLO              | -1.8169723 | down | piccolo (presynaptic cytomatrix protein)                          |
| 7974125 | KIAA0423          | -1.8171631 | down |                                                                   |
| 7901915 | ALG6              | -1.8172532 | down | asparagine-linked glycosylation 6 homolog (S. cerevisia)          |
| 7917875 | F3                | -1.8176312 | down | coagulation factor III (thromboplastin, tissue factor)            |
| 8156604 | C9orf102          | -1.818301  | down | chromosome 9 open reading frame 102                               |
| 8151686 | MMP16             | -1.8189049 | down | matrix metalloproteinase 16 (membrane-inserted)                   |
| 7969677 | MBNL2             | -1.8189343 | down | muscleblind-like 2 (Drosophila)                                   |
| 8036324 | ZNF260            | -1.8200707 | down | zinc finger protein 260                                           |
| 8146225 | C8orf40           | -1.8207812 | down | chromosome 8 open reading frame 40                                |
| 8146625 | NKAIN3            | -1.822274  | down | Na <sup>+</sup> /K <sup>+</sup> transporting ATPase interacting 3 |
| 7962013 | ERGIC2            | -1.8257408 | down | ERGIC and golgi 2                                                 |
| 7914550 | ZBTB8OS           | -1.8275282 | down | zinc finger and BTB domain containing 8 opposite strand           |
| 7978376 | STXBP6            | -1.8307303 | down | syntaxin binding protein 6 (amisyn)                               |
| 7933139 | ZNF33B            | -1.8317744 | down | zinc finger protein 33B                                           |
| 8102567 | PRDM5             | -1.8322209 | down | PR domain containing 5                                            |
| 8070411 | C21orf88   LOC100 | -1.832775  | down | chromosome 21 open reading frame 88   similar to C2               |
| 8167998 | AR                | -1.8341084 | down | androgen receptor (dihydrotestosterone receptor; test             |
| 8098263 | PALLD             | -1.8369318 | down | palladin, cytoskeletal associated protein                         |
| 7994237 | LCMT1             | -1.838702  | down | leucine carboxyl methyltransferase 1                              |
| 8156060 | TLE4              | -1.8387449 | down | transducin-like enhancer of split 4 (E(sp1) homolog, Dr           |
| 8108733 | PCDHB12           | -1.8387892 | down | protocadherin beta 12                                             |
| 8123467 | C6orf70           | -1.8417041 | down | chromosome 6 open reading frame 70                                |
| 8113103 | KIAA0825          | -1.8418199 | down |                                                                   |

Supplemental Table 1c  
eMSC vs. eSF

|         |                 |            |      |                                                            |
|---------|-----------------|------------|------|------------------------------------------------------------|
| 8154670 | IFT74           | -1.8418845 | down | intraflagellar transport 74 homolog (Chlamydomonas)        |
| 8140579 | CACNA2D1        | -1.8418992 | down | calcium channel, voltage-dependent, alpha 2/delta subunit  |
| 7965523 | NR2C1           | -1.8428693 | down | nuclear receptor subfamily 2, group C, member 1            |
| 8089954 | IQCB1           | -1.8440082 | down | IQ motif containing B1                                     |
| 8100478 | AASDH           | -1.8456246 | down | aminoadipate-semialdehyde dehydrogenase                    |
| 8089203 | SENP7           | -1.8469316 | down | SUMO1/sentrin specific peptidase 7                         |
| 7957570 | PLXNC1          | -1.8470054 | down | plexin C1                                                  |
| 8107164 | HISPPD1         | -1.8479518 | down | histidine acid phosphatase domain containing 1             |
| 7903565 | GPSM2           | -1.8487318 | down | G-protein signaling modulator 2 (AGS3-like, C. elegans)    |
| 8151756 | TMEM55A         | -1.8506933 | down | transmembrane protein 55A                                  |
| 8112822 | DMGDH           | -1.8508649 | down | dimethylglycine dehydrogenase                              |
| 7973756 | KIAA1333        | -1.8513589 | down |                                                            |
| 8134122 | AKAP9           | -1.8522336 | down | A kinase (PRKA) anchor protein (yotiao) 9                  |
| 8059642 | SLC16A14        | -1.8536597 | down | solute carrier family 16, member 14 (monocarboxylic acid)  |
| 8118455 | C4A C4B         | -1.8546927 | down | complement component 4A (Rodgers blood group)   C4B        |
| 8118409 | C4A C4B         | -1.8559186 | down | complement component 4A (Rodgers blood group)   C4B        |
| 8122327 | CCDC28A         | -1.8560725 | down | coiled-coil domain containing 28A                          |
| 7929562 | ZNF518A         | -1.8577529 | down | zinc finger protein 518A                                   |
| 7971486 | C13orf18 LOC728 | -1.8580612 | down | chromosome 13 open reading frame 18   hypothetical protein |
| 7943376 | KIAA1377        | -1.8585356 | down |                                                            |
| 7967933 | IFT88           | -1.8617692 | down | intraflagellar transport 88 homolog (Chlamydomonas)        |
| 8102464 | TRAM1L1         | -1.8618282 | down | translocation associated membrane protein 1-like 1         |
| 7933092 | ZNF248          | -1.8620741 | down | zinc finger protein 248                                    |
| 8179399 | C4A C4B         | -1.863249  | down | complement component 4A (Rodgers blood group)   C4B        |
| 8160138 | NFIB            | -1.8646704 | down | nuclear factor I/B                                         |
| 8093145 | C3orf34         | -1.866445  | down | chromosome 3 open reading frame 34                         |
| 8147396 | INTS8           | -1.868438  | down | integrator complex subunit 8                               |
| 8069668 | CYYR1           | -1.8694218 | down | cysteine/tyrosine-rich 1                                   |
| 8145365 | DOCK5           | -1.8705282 | down | dedicator of cytokinesis 5                                 |
| 8022572 | OSBPL1A         | -1.8706832 | down | oxysterol binding protein-like 1A                          |
| 8121768 | PKIB            | -1.871881  | down | protein kinase (cAMP-dependent, catalytic) inhibitor beta  |
| 8128592 | ATG5            | -1.8734434 | down |                                                            |
| 7902367 | ACADM           | -1.8738265 | down | acyl-Coenzyme A dehydrogenase, C-4 to C-12 straight chain  |



Supplemental Table 1c  
eMSC vs. eSF

|         |               |            |      |                                                        |
|---------|---------------|------------|------|--------------------------------------------------------|
| 8056829 | CIR           | -1.8740877 | down | CBF1 interacting corepressor                           |
| 8014100 | C17orf75      | -1.875734  | down | chromosome 17 open reading frame 75                    |
| 8083282 | HPS3          | -1.877846  | down | Hermansky-Pudlak syndrome 3                            |
| 8080926 | ARL6IP5       | -1.8788558 | down | ADP-ribosylation-like factor 6 interacting protein 5   |
| 7935613 | HPSE2         | -1.8791653 | down | heparanase 2                                           |
| 7951545 | EXPH5         | -1.8836313 | down | exophilin 5                                            |
| 8092328 | MCCC1         | -1.8847487 | down | methylcrotonoyl-Coenzyme A carboxylase 1 (alpha)       |
| 8046833 | FLJ44048      | -1.8863239 | down |                                                        |
| 8074845 | ZNF280B       | -1.8882222 | down | zinc finger protein 280B                               |
| 8066402 | C20orf111     | -1.8885736 | down | chromosome 20 open reading frame 111                   |
| 8163257 | LPAR1         | -1.8888264 | down | lysophosphatidic acid receptor 1                       |
| 8107850 | CHSY3         | -1.8893166 | down | chondroitin sulfate synthase 3                         |
| 8142332 | IMMP2L        | -1.8910954 | down | IMP2 inner mitochondrial membrane peptidase-like (S.   |
| 8094226 | LOC285550     | -1.8929316 | down |                                                        |
| 8012918 | CDRT4 FAM18B2 | -1.8942027 | down | CMT1A duplicated region transcript 4   family with seq |
| 7937079 | BNIP3         | -1.8955761 | down | BCL2/adenovirus E1B 19kDa interacting protein 3        |
| 7976073 | FLRT2         | -1.8958735 | down | fibronectin leucine rich transmembrane protein 2       |
| 8146717 | SGK3 C8orf44  | -1.8958759 | down | serum/glucocorticoid regulated kinase family, member   |
| 8173812 | NSBP1         | -1.8971746 | down | nucleosomal binding protein 1                          |
| 8170538 | GABRQ         | -1.8990538 | down | gamma-aminobutyric acid (GABA) receptor, theta         |
| 7997396 | ATMIN         | -1.9010019 | down | ATM interactor                                         |
| 8052125 | ASB3          | -1.9013255 | down | ankyrin repeat and SOCS box-containing 3               |
| 7975632 | ZADH1         | -1.9028869 | down | zinc binding alcohol dehydrogenase, domain containin   |
| 8157233 | HSDL2         | -1.9074131 | down | hydroxysteroid dehydrogenase like 2                    |
| 7950883 | OR7E13P       | -1.908097  | down | olfactory receptor, family 7, subfamily E, member 13 p |
| 8122672 | MAP3K7IP2     | -1.9094791 | down | mitogen-activated protein kinase kinase kinase 7 inter |
| 7998952 | TIGD7         | -1.9097396 | down | tigger transposable element derived 7                  |
| 7974166 | FANCM         | -1.9109043 | down | Fanconi anemia, complementation group M                |
| 7911989 | RPL22         | -1.9122212 | down | ribosomal protein L22                                  |
| 7916185 | ZCCHC11       | -1.9131982 | down | zinc finger, CCHC domain containing 11                 |
| 8110971 | CMBL          | -1.9141635 | down | carboxymethylenebutenolidase homolog (Pseudomon        |
| 8110147 | C5orf25       | -1.9142604 | down | chromosome 5 open reading frame 25                     |
| 8104394 | ADCY2         | -1.9145302 | down | adenylate cyclase 2 (brain)                            |

Supplemental Table 1c  
eMSC vs. eSF

|         |                 |            |      |                                                              |
|---------|-----------------|------------|------|--------------------------------------------------------------|
| 7916570 | OMA1 DAB1       | -1.9147593 | down | OMA1 homolog, zinc metallopeptidase ( <i>S. cerevisiae</i> ) |
| 8004184 | XAF1            | -1.9156884 | down | XIAP associated factor 1                                     |
| 8022612 | ZNF521          | -1.9161694 | down | zinc finger protein 521                                      |
| 7971541 | SUCLA2          | -1.9165365 | down | succinate-CoA ligase, ADP-forming, beta subunit              |
| 7988467 | FBN1            | -1.9174244 | down | fibrillin 1                                                  |
| 8136177 | KIAA0265        | -1.9214919 | down |                                                              |
| 8120362 | C6orf65         | -1.9215738 | down | chromosome 6 open reading frame 65                           |
| 8162019 | KIF27 LOC389765 | -1.9218144 | down | kinesin family member 27   similar to KIF27C                 |
| 7952484 | LOC219854       | -1.9220387 | down |                                                              |
| 8041676 | DYNC2LI1        | -1.9221565 | down | dynein, cytoplasmic 2, light intermediate chain 1            |
| 8123246 | SLC22A3         | -1.9234761 | down | solute carrier family 22 (extraneuronal monoamine tra        |
| 7927799 | REEP3           | -1.9241508 | down | receptor accessory protein 3                                 |
| 8022559 | ANKRD29         | -1.9243333 | down | ankyrin repeat domain 29                                     |
| 7957417 | TMTC2           | -1.9279039 | down | transmembrane and tetratricopeptide repeat containir         |
| 8159984 | C9orf46         | -1.9281257 | down | chromosome 9 open reading frame 46                           |
| 8020973 | FHOD3           | -1.9317919 | down | formin homology 2 domain containing 3                        |
| 7947274 | MPPED2          | -1.9325019 | down | metallophosphoesterase domain containing 2                   |
| 7916862 | GPR177          | -1.9345247 | down | G protein-coupled receptor 177                               |
| 8102440 | ARSJ            | -1.9363123 | down | arylsulfatase family, member J                               |
| 8107234 | MAN2A1          | -1.9373786 | down | mannosidase, alpha, class 2A, member 1                       |
| 8174235 | TCEAL5          | -1.9447964 | down | transcription elongation factor A (SII)-like 5               |
| 8147019 | C8orf70         | -1.946681  | down | chromosome 8 open reading frame 70                           |
| 8102362 | TIFA            | -1.947387  | down | TRAF-interacting protein with forkhead-associated don        |
| 7969390 | PIBF1           | -1.947413  | down | progesterone immunomodulatory binding factor 1               |
| 8157027 | NIPSNAP3B       | -1.9482085 | down | nipsnap homolog 3B ( <i>C. elegans</i> )                     |
| 8113050 | CETN3           | -1.9519542 | down | centrin, EF-hand protein, 3 (CDC31 homolog, yeast)           |
| 7939298 | CAT             | -1.952417  | down | catalase                                                     |
| 8149825 | STC1            | -1.9531399 | down | stanniocalcin 1                                              |
| 8053648 | KRCC1           | -1.9538848 | down | lysine-rich coiled-coil 1                                    |
| 8060758 | PRNP            | -1.9540286 | down | prion protein (p27-30) (Creutzfeldt-Jakob disease, Gers      |
| 7910030 | C1orf67 DNAH14  | -1.9559509 | down | chromosome 1 open reading frame 67   dynein, axone           |
| 8098021 | GRIA2           | -1.9573991 | down | glutamate receptor, ionotropic, AMPA 2                       |
| 8151496 | ZNF704          | -1.9577143 | down | zinc finger protein 704                                      |

Supplemental Table 1c  
eMSC vs. eSF

|         |                 |            |      |                                                                |
|---------|-----------------|------------|------|----------------------------------------------------------------|
| 7946365 | STK33           | -1.9640713 | down | serine/threonine kinase 33                                     |
| 8139488 | IGFBP3          | -1.9660294 | down | insulin-like growth factor binding protein 3                   |
| 8142697 | POT1            | -1.966949  | down |                                                                |
| 7921987 | TMCO1           | -1.9692202 | down | transmembrane and coiled-coil domains 1                        |
| 7934570 | KCNMA1          | -1.9704126 | down | potassium large conductance calcium-activated channel          |
| 8022473 | ESCO1           | -1.9711133 | down | establishment of cohesion 1 homolog 1 ( <i>S. cerevisiae</i> ) |
| 8169603 | LONRF3          | -1.971864  | down | LON peptidase N-terminal domain and ring finger 3              |
| 8147273 | SLC26A7 LOC100: | -1.9727888 | down | solute carrier family 26, member 7   similar to hCG200         |
| 7974229 | KLHDC2          | -1.9728713 | down | kelch domain containing 2                                      |
| 8057677 | SLC40A1         | -1.9741724 | down | solute carrier family 40 (iron-regulated transporter), m       |
| 8168968 | GPRASP1         | -1.9747423 | down | G protein-coupled receptor associated sorting protein          |
| 8117045 | RBM24           | -1.9752814 | down | RNA binding motif protein 24                                   |
| 8171024 | LOC401622       | -1.9766308 | down | similar to LINE-1 reverse transcriptase homolog                |
| 8091511 | P2RY14          | -1.9788653 | down | purinergic receptor P2Y, G-protein coupled, 14                 |
| 7930882 | FAM45A FAM45E   | -1.9793437 | down | family with sequence similarity 45, member A   family          |
| 8081503 | DZIP3           | -1.9796017 | down | DAZ interacting protein 3, zinc finger                         |
| 7974214 | KLHDC1          | -1.983837  | down | kelch domain containing 1                                      |
| 8125415 | C6orf10         | -1.9848379 | down | chromosome 6 open reading frame 10                             |
| 8096176 | PTPN13          | -1.9859627 | down | protein tyrosine phosphatase, non-receptor type 13 (A          |
| 7974725 | C14orf100       | -1.9862149 | down | chromosome 14 open reading frame 100                           |
| 8161892 | GNA14           | -1.9871131 | down | guanine nucleotide binding protein (G protein), alpha 1        |
| 8145361 | NEFM            | -1.989982  | down | neurofilament, medium polypeptide 150kDa                       |
| 8052233 | C2orf63         | -1.9922494 | down | chromosome 2 open reading frame 63                             |
| 8107632 | SNX24           | -1.9926301 | down | sorting nexin 24                                               |
| 7907297 | FMO4            | -1.9930322 | down | flavin containing monooxygenase 4                              |
| 8150691 | EFCAB1          | -1.993388  | down | EF-hand calcium binding domain 1                               |
| 8098041 | TMEM144         | -1.9961305 | down | transmembrane protein 144                                      |
| 7947512 | DKFZP586H2123   | -1.9971675 | down | regeneration associated muscle protease                        |
| 7924476 | TAF1A           | -1.9975125 | down | TATA box binding protein (TBP)-associated factor, RNA          |
| 7903908 | CEPT1           | -1.9975238 | down | choline/ethanolamine phosphotransferase 1                      |
| 8144230 | ZNF596          | -1.9984012 | down | zinc finger protein 596                                        |
| 8016390 | COPZ2           | -1.9990067 | down | coatamer protein complex, subunit zeta 2                       |
| 8114354 | NME5            | -1.9997973 | down | non-metastatic cells 5, protein expressed in (nucleosid        |

Supplemental Table 1c  
eMSC vs. eSF

|         |          |            |      |                                                                 |
|---------|----------|------------|------|-----------------------------------------------------------------|
| 8150565 | RNF170   | -2.000481  | down | ring finger protein 170                                         |
| 7950654 | ALG8     | -2.0005765 | down | asparagine-linked glycosylation 8 homolog ( <i>S. cerevisia</i> |
| 8103563 | DDX60    | -2.001267  | down | DEAD (Asp-Glu-Ala-Asp) box polypeptide 60                       |
| 7932637 | ANKRD26  | -2.0019863 | down | ankyrin repeat domain 26                                        |
| 7954810 | LRRK2    | -2.0019977 | down | leucine-rich repeat kinase 2                                    |
| 7962427 | PUS7L    | -2.0026958 | down | pseudouridylate synthase 7 homolog ( <i>S. cerevisiae</i> )-lik |
| 8069553 | NRIP1    | -2.0049274 | down | nuclear receptor interacting protein 1                          |
| 7915775 | IPP      | -2.005309  | down | intracisternal A particle-promoted polypeptide                  |
| 8088526 | THOC7    | -2.0095904 | down | THO complex 7 homolog ( <i>Drosophila</i> )                     |
| 8092970 | APOD     | -2.0099716 | down | apolipoprotein D                                                |
| 8142497 | CTTNBP2  | -2.0100884 | down | cortactin binding protein 2                                     |
| 8106743 | VCAN     | -2.0109525 | down | versican                                                        |
| 8044700 | DPP10    | -2.0117044 | down | dipeptidyl-peptidase 10                                         |
| 7970569 | SACS     | -2.0177324 | down | spastic ataxia of Charlevoix-Saguenay (sacsin)                  |
| 8009301 | PRKCA    | -2.0186586 | down | protein kinase C, alpha                                         |
| 7909801 | LYPLAL1  | -2.0187128 | down | lysophospholipase-like 1                                        |
| 7988426 | SLC30A4  | -2.0196183 | down | solute carrier family 30 (zinc transporter), member 4           |
| 8101659 | SPARCL1  | -2.0203226 | down | SPARC-like 1 (mast9, hevin)                                     |
| 7953200 | CCND2    | -2.0207922 | down | cyclin D2                                                       |
| 8097307 | INTU     | -2.0209992 | down | inturned planar cell polarity effector homolog ( <i>Drosopl</i> |
| 8108744 | PCDHB14  | -2.0211763 | down | protocadherin beta 14                                           |
| 8088491 | CADPS    | -2.0212207 | down | Ca <sup>2+</sup> -dependent secretion activator                 |
| 8173647 | ZDHHC15  | -2.0270119 | down | zinc finger, DHHC-type containing 15                            |
| 7972269 | TGDS     | -2.0281975 | down | TDP-glucose 4,6-dehydratase                                     |
| 8115600 | LOC63920 | -2.033619  | down | transposon-derived Buster3 transposase-like                     |
| 7993756 | ACSM3    | -2.034617  | down | acyl-CoA synthetase medium-chain family member 3                |
| 7927631 | DKK1     | -2.03479   | down | dickkopf homolog 1 ( <i>Xenopus laevis</i> )                    |
| 7965022 | KRR1     | -2.0374966 | down |                                                                 |
| 7984298 | DIS3L    | -2.0382106 | down | DIS3 mitotic control homolog ( <i>S. cerevisiae</i> )-like      |
| 8056102 | CD302    | -2.0394692 | down |                                                                 |
| 8078360 | STT3B    | -2.039832  | down | STT3, subunit of the oligosaccharyltransferase complex          |
| 7959834 | GLT1D1   | -2.041807  | down | glycosyltransferase 1 domain containing 1                       |
| 8105633 | PPWD1    | -2.0458734 | down | peptidylprolyl isomerase domain and WD repeat conta             |

Supplemental Table 1c  
eMSC vs. eSF

|         |                |            |      |                                                          |
|---------|----------------|------------|------|----------------------------------------------------------|
| 7917276 | LPAR3          | -2.0496833 | down | lysophosphatidic acid receptor 3                         |
| 8101587 | MAPK10         | -2.0503688 | down | mitogen-activated protein kinase 10                      |
| 8061227 | SLC24A3        | -2.052043  | down | solute carrier family 24 (sodium/potassium/calcium ex    |
| 8147375 | DPY19L4        | -2.056213  | down | dpv-19-like 4 (C. elegans)                               |
| 8141872 | NAPEPLD        | -2.0568612 | down | N-acyl phosphatidylethanolamine phospholipase D          |
| 7910611 | KCNK1          | -2.060127  | down | potassium channel, subfamily K, member 1                 |
| 8116983 | CD83           | -2.0614803 | down |                                                          |
| 8083616 | MLF1           | -2.0674279 | down | myeloid leukemia factor 1                                |
| 8111772 | DAB2           | -2.068214  | down | disabled homolog 2, mitogen-responsive phosphoprot       |
| 8046078 | B3GALT1        | -2.0683026 | down | UDP-Gal:betaGlcNAc beta 1,3-galactosyltransferase, pc    |
| 7990714 | CHRNA3         | -2.0695639 | down | cholinergic receptor, nicotinic, alpha 3                 |
| 7982366 | SCG5           | -2.0743136 | down | secretogranin V (7B2 protein)                            |
| 8042086 | VRK2           | -2.0751143 | down | vaccinia related kinase 2                                |
| 7973770 | SCFD1          | -2.075641  | down | sec1 family domain containing 1                          |
| 8121916 | RSPO3          | -2.0765674 | down | R-spondin 3 homolog (Xenopus laevis)                     |
| 8095758 | RCHY1          | -2.0773234 | down | ring finger and CHY zinc finger domain containing 1      |
| 8101762 | SNCA           | -2.0808847 | down | synuclein, alpha (non A4 component of amyloid precur     |
| 7922268 | KIFAP3         | -2.0854895 | down | kinesin-associated protein 3                             |
| 8172708 | NUDT11         | -2.086601  | down | nudix (nucleoside diphosphate linked moiety X)-type n    |
| 8022118 | EPB41L3        | -2.091654  | down | erythrocyte membrane protein band 4.1-like 3             |
| 8122827 | C6orf97        | -2.0960412 | down | chromosome 6 open reading frame 97                       |
| 7976818 | SNORD114-6     | -2.0984929 | down | small nucleolar RNA, C/D box 114-6                       |
| 8155883 | OSTF1          | -2.0993018 | down | osteoclast stimulating factor 1                          |
| 8161460 | CNTNAP3B LOC38 | -2.1016364 | down | contactin associated protein-like 3B   similar to KIAA17 |
| 8046380 | ITGA6          | -2.1028225 | down | integrin, alpha 6                                        |
| 7962312 | ABCD2          | -2.1041982 | down | ATP-binding cassette, sub-family D (ALD), member 2       |
| 8106494 | BHMT2          | -2.1068196 | down | betaine-homocysteine methyltransferase 2                 |
| 8068644 | IGSF5          | -2.1082056 | down | immunoglobulin superfamily, member 5                     |
| 7954985 | TMEM117        | -2.1086073 | down | transmembrane protein 117                                |
| 8158671 | ASS1           | -2.1098044 | down | argininosuccinate synthetase 1                           |
| 7926596 | COMMD3         | -2.1107287 | down | COMM domain containing 3                                 |
| 7924309 | ESRRG          | -2.11375   | down | estrogen-related receptor gamma                          |
| 8155540 | CNTNAP3B LOC38 | -2.116974  | down | contactin associated protein-like 3B   similar to KIAA17 |

Supplemental Table 1c  
eMSC vs. eSF

|         |                 |            |      |                                                             |
|---------|-----------------|------------|------|-------------------------------------------------------------|
| 8057719 | HIBCH           | -2.1172435 | down | 3-hydroxyisobutyryl-Coenzyme A hydrolase                    |
| 7932598 | C10orf63        | -2.117908  | down | chromosome 10 open reading frame 63                         |
| 8008566 | STXBP4          | -2.1202226 | down | syntaxin binding protein 4                                  |
| 8173825 | RPS6KA6         | -2.1222274 | down | ribosomal protein S6 kinase, 90kDa, polypeptide 6           |
| 8035896 | TSHZ3           | -2.1258872 | down | teashirt zinc finger homeobox 3                             |
| 8112107 | PPAP2A          | -2.1295407 | down | phosphatidic acid phosphatase type 2A                       |
| 7978391 | NOVA1           | -2.134708  | down | neuro-oncological ventral antigen 1                         |
| 8171901 | MAP3K7IP3       | -2.1347272 | down | mitogen-activated protein kinase kinase 7 inter:            |
| 8077472 | GRM7            | -2.1359773 | down | glutamate receptor, metabotropic 7                          |
| 8044417 | TMEM87B         | -2.1380727 | down | transmembrane protein 87B                                   |
| 8156575 | ATMIN           | -2.1382012 | down | ATM interactor                                              |
| 8173955 | SYTL4           | -2.1383183 | down | synaptotagmin-like 4 (granuphilin-a)                        |
| 8167897 | RRAGB           | -2.13841   | down | Ras-related GTP binding B                                   |
| 8151684 | C8orf57 LOC1001 | -2.1413221 | down | chromosome 8 open reading frame 57   hypothetical L         |
| 8108475 | LOC492311       | -2.1438532 | down | similar to bovine IgA regulatory protein                    |
| 7951565 | ARHGAP20        | -2.1453626 | down | Rho GTPase activating protein 20                            |
| 7922976 | PTGS2           | -2.1483924 | down | prostaglandin-endoperoxide synthase 2 (prostaglandin        |
| 8047174 | SLC39A10        | -2.1536736 | down | solute carrier family 39 (zinc transporter), member 10      |
| 8106689 | CKMT2           | -2.1544304 | down | creatine kinase, mitochondrial 2 (sarcomeric)               |
| 8147469 | PGCP            | -2.1558876 | down | plasma glutamate carboxypeptidase                           |
| 8099218 | PPP2R2C         | -2.1583042 | down | protein phosphatase 2 (formerly 2A), regulatory subun       |
| 8105348 | LOC493869       | -2.1627436 | down | similar to RIKEN cDNA 2310016C16                            |
| 8099476 | PROM1           | -2.167288  | down | prominin 1                                                  |
| 7947496 | SLC1A2          | -2.1684313 | down | solute carrier family 1 (glial high affinity glutamate trar |
| 8051637 | DHX57           | -2.1711946 | down | DEAH (Asp-Glu-Ala-Asp/His) box polypeptide 57               |
| 7980580 | GALC            | -2.175086  | down | galactosylceramidase                                        |
| 8102065 | BDH2            | -2.1761668 | down | 3-hydroxybutyrate dehydrogenase, type 2                     |
| 8169580 | IL13RA1         | -2.1799853 | down | interleukin 13 receptor, alpha 1                            |
| 8046488 | CDCA7           | -2.1803074 | down | cell division cycle associated 7                            |
| 7974816 | SLC38A6         | -2.1821072 | down | solute carrier family 38, member 6                          |
| 8146427 | PCMTD1 LOC100:  | -2.1829607 | down | protein-L-isoaspartate (D-aspartate) O-methyltransfer:      |
| 7965060 | BBS10           | -2.1835012 | down | Bardet-Biedl syndrome 10                                    |
| 8000574 | NUPR1           | -2.1854472 | down | nuclear protein 1                                           |

Supplemental Table 1c  
eMSC vs. eSF

|         |              |            |      |                                                         |
|---------|--------------|------------|------|---------------------------------------------------------|
| 8082869 | PPP2R3A      | -2.1860867 | down | protein phosphatase 2 (formerly 2A), regulatory subun   |
| 8041179 | CLIP4        | -2.1864057 | down | CAP-GLY domain containing linker protein family, mem    |
| 8123407 | MLLT4        | -2.1946006 | down | myeloid/lymphoid or mixed-lineage leukemia (trithora    |
| 8112596 | ANKRA2       | -2.1968603 | down | ankyrin repeat, family A (RFXANK-like), 2               |
| 8002492 | HYDIN HYDIN2 | -2.197245  | down | hydrocephalus inducing homolog (mouse)   hydroceph      |
| 8154295 | IL33         | -2.1978114 | down | interleukin 33                                          |
| 8137264 | TMEM176A     | -2.1998506 | down | transmembrane protein 176A                              |
| 8156905 | TMEFF1       | -2.2007315 | down | transmembrane protein with EGF-like and two follistat   |
| 8131205 | SDK1         | -2.2045147 | down | sidekick homolog 1, cell adhesion molecule (chicken)    |
| 8078319 | ZCWPW2       | -2.2094805 | down | zinc finger, CW type with PWWP domain 2                 |
| 7938629 | PDE3B        | -2.2095273 | down | phosphodiesterase 3B, cGMP-inhibited                    |
| 8142270 | NRCAM        | -2.2097669 | down | neuronal cell adhesion molecule                         |
| 7901720 | PRKAA2       | -2.2152    | down | protein kinase, AMP-activated, alpha 2 catalytic subuni |
| 7932554 | ARHGAP21     | -2.2159214 | down | Rho GTPase activating protein 21                        |
| 8143341 | JHDM1D       | -2.216986  | down | jumonji C domain containing histone demethylase 1 hc    |
| 8018761 | ST6GALNAC2   | -2.2192018 | down | ST6 (alpha-N-acetyl-neuraminy-2,3-beta-galactosyl-1,3   |
| 8077366 | LRRN1        | -2.2273417 | down | leucine rich repeat neuronal 1                          |
| 7964997 | CAPS2        | -2.2275329 | down | calcyphosine 2                                          |
| 8123342 | FGFR1OP CCR6 | -2.2313519 | down | FGFR1 oncogene partner   chemokine (C-C motif) rece     |
| 7953603 | C1S          | -2.234242  | down | complement component 1, s subcomponent                  |
| 7943779 | C11orf1      | -2.2349184 | down | chromosome 11 open reading frame 1                      |
| 7978407 | PRKD1        | -2.2358427 | down | protein kinase D1                                       |
| 7954711 | C12orf35     | -2.248286  | down | chromosome 12 open reading frame 35                     |
| 8127425 | LMBRD1       | -2.2541418 | down | LMBR1 domain containing 1                               |
| 8145766 | MST131       | -2.256526  | down | MSTP131                                                 |
| 8008588 | HLF          | -2.2636495 | down | hepatic leukemia factor                                 |
| 7992917 | CLUAP1       | -2.2682118 | down | clusterin associated protein 1                          |
| 8041561 | MORN2        | -2.2721016 | down | MORN repeat containing 2                                |
| 7962151 | MGC24039     | -2.274053  | down |                                                         |
| 8121043 | ORC3L        | -2.2752204 | down | origin recognition complex, subunit 3-like (yeast)      |
| 8142143 | COG5         | -2.276566  | down | component of oligomeric golgi complex 5                 |
| 8131539 | TMEM106B     | -2.2770557 | down | transmembrane protein 106B                              |
| 8017704 | FLJ32065     | -2.2797651 | down |                                                         |

Supplemental Table 1c  
eMSC vs. eSF

|         |                |            |      |                                                          |
|---------|----------------|------------|------|----------------------------------------------------------|
| 7961083 | CLEC2B         | -2.2820961 | down | C-type lectin domain family 2, member B                  |
| 8173755 | ITM2A          | -2.2879496 | down | integral membrane protein 2A                             |
| 8133983 | ADAM22         | -2.2910159 | down | ADAM metallopeptidase domain 22                          |
| 8165642 | TMEM203        | -2.2943687 | down | transmembrane protein 203                                |
| 7938364 | WEE1           | -2.2983294 | down |                                                          |
| 8021946 | COLEC12        | -2.2984533 | down | collectin sub-family member 12                           |
| 8135734 | C7orf58        | -2.3025553 | down | chromosome 7 open reading frame 58                       |
| 8128013 | RARS2          | -2.3068678 | down | arginyl-tRNA synthetase 2, mitochondrial                 |
| 8147970 | EBAG9          | -2.309082  | down | estrogen receptor binding site associated, antigen, 9    |
| 7972297 | ABCC4          | -2.3114502 | down | ATP-binding cassette, sub-family C (CFTR/MRP), memb      |
| 8055496 | LRP1B          | -2.3127322 | down | low density lipoprotein-related protein 1B (deleted in t |
| 7933933 | DNAJC12        | -2.3197112 | down | DnaJ (Hsp40) homolog, subfamily C, member 12             |
| 8163002 | KLF4           | -2.3205612 | down | Kruppel-like factor 4 (gut)                              |
| 8120613 | RIMS1          | -2.3208814 | down | regulating synaptic membrane exocytosis 1                |
| 7987369 | ATPBD4         | -2.3244355 | down | ATP binding domain 4                                     |
| 8044236 | GCC2           | -2.3246567 | down | GRIP and coiled-coil domain containing 2                 |
| 7909730 | KCNK2          | -2.3257232 | down | potassium channel, subfamily K, member 2                 |
| 7970844 | KATNAL1        | -2.3274724 | down | katanin p60 subunit A-like 1                             |
| 7964745 | TMBIM4 LOC100: | -2.3301783 | down | transmembrane BAX inhibitor motif containing 4   hyp     |
| 8081138 | EPHA6          | -2.3319073 | down | EPH receptor A6                                          |
| 8106336 | SV2C           | -2.3412526 | down | synaptic vesicle glycoprotein 2C                         |
| 7976816 | SNORD114-3     | -2.3440459 | down | small nucleolar RNA, C/D box 114-3                       |
| 7969114 | SETDB2         | -2.350674  | down | SET domain, bifurcated 2                                 |
| 7917912 | DPYD           | -2.3623912 | down | dihydropyrimidine dehydrogenase                          |
| 7917283 | MCOLN2         | -2.3650975 | down | mucolipin 2                                              |
| 8078619 | ITGA9          | -2.3663678 | down | integrin, alpha 9                                        |
| 8132376 | STARD3NL       | -2.3675396 | down | STARD3 N-terminal like                                   |
| 8132399 | C7orf36        | -2.3681014 | down | chromosome 7 open reading frame 36                       |
| 8001423 | RPGRIP1L       | -2.3718705 | down | RPGRIP1-like                                             |
| 7979131 | GNG2           | -2.3754613 | down | guanine nucleotide binding protein (G protein), gamma    |
| 8122818 | C6orf211       | -2.3879743 | down | chromosome 6 open reading frame 211                      |
| 8147079 | LRRCC1         | -2.3912227 | down | leucine rich repeat and coiled-coil domain containing 1  |
| 8154178 | JAK2           | -2.3961427 | down | Janus kinase 2 (a protein tyrosine kinase)               |



Supplemental Table 1c  
eMSC vs. eSF

|         |               |            |      |                                                           |
|---------|---------------|------------|------|-----------------------------------------------------------|
| 8120552 | FAM135A       | -2.4008982 | down | family with sequence similarity 135, member A             |
| 8023575 | CCBE1         | -2.4046955 | down | collagen and calcium binding EGF domains 1                |
| 8018038 | ABCA5         | -2.409236  | down | ATP-binding cassette, sub-family A (ABC1), member 5       |
| 8172225 | EFHC2         | -2.4099045 | down | EF-hand domain (C-terminal) containing 2                  |
| 7981320 | MEG3          | -2.4177969 | down | maternally expressed 3                                    |
| 8094184 | C1QTNF7       | -2.4200094 | down | C1q and tumor necrosis factor related protein 7           |
| 8169015 | TCEAL7        | -2.4231367 | down | transcription elongation factor A (SII)-like 7            |
| 7975459 | SIPA1L1       | -2.4418929 | down | signal-induced proliferation-associated 1 like 1          |
| 8167603 | CLCN5         | -2.4437587 | down | chloride channel 5 (nephrolithiasis 2, X-linked, Dent dis |
| 8063536 | TFAP2C        | -2.446443  | down | transcription factor AP-2 gamma (activating enhancer I    |
| 8121794 | SMPDL3A       | -2.4469676 | down | sphingomyelin phosphodiesterase, acid-like 3A             |
| 8157487 | PAPPA         | -2.4515524 | down | pregnancy-associated plasma protein A, pappalysin 1       |
| 7985268 | FAH           | -2.4522393 | down | fumarylacetoacetate hydrolase (fumarylacetoacetase)       |
| 7936463 | ABLIM1        | -2.4548285 | down | actin binding LIM protein 1                               |
| 7961891 | BHLHB3        | -2.4676847 | down | basic helix-loop-helix domain containing, class B, 3      |
| 8145611 | FZD3          | -2.4734063 | down | frizzled homolog 3 (Drosophila)                           |
| 7969861 | ITGBL1        | -2.474663  | down | integrin, beta-like 1 (with EGF-like repeat domains)      |
| 8157193 | ZNF483        | -2.4751384 | down | zinc finger protein 483                                   |
| 7959807 | TMEM132B      | -2.4756153 | down | transmembrane protein 132B                                |
| 8046003 | GCA           | -2.4760795 | down | grancalcin, EF-hand calcium binding protein               |
| 8168412 | LOC554203     | -2.4798062 | down |                                                           |
| 8051864 | hCG_1645220   | -2.4886322 | down | hCG1645220                                                |
| 8128837 | C6orf186 DDO  | -2.4913814 | down | chromosome 6 open reading frame 186   D-aspartate t       |
| 7918134 | AMY1A AMY1B / | -2.4914985 | down | amylase, alpha 1A (salivary)   amylase, alpha 1B (saliva  |
| 8144802 | PDGFRL        | -2.4980285 | down | platelet-derived growth factor receptor-like              |
| 7903425 | AMY1A AMY1B / | -2.4982636 | down | amylase, alpha 1A (salivary)   amylase, alpha 1B (saliva  |
| 7903440 | AMY1A AMY1B / | -2.5002282 | down | amylase, alpha 1A (salivary)   amylase, alpha 1B (saliva  |
| 8088548 | LOC401070     | -2.5006003 | down | FLJ43791 protein                                          |
| 8019964 | ARHGAP28      | -2.5014386 | down | Rho GTPase activating protein 28                          |
| 7954245 | PLEKHA5       | -2.501675  | down | pleckstrin homology domain containing, family A mem       |
| 8003667 | SERPINF1      | -2.5122    | down | serpin peptidase inhibitor, clade F (alpha-2 antiplasmir  |
| 8063458 | DOK5          | -2.513279  | down | docking protein 5                                         |
| 8105121 | GHR           | -2.5145493 | down | growth hormone receptor                                   |

Supplemental Table 1c  
eMSC vs. eSF

|         |                           |            |      |                                                          |
|---------|---------------------------|------------|------|----------------------------------------------------------|
| 8113433 | EFNA5                     | -2.5146923 | down | ephrin-A5                                                |
| 7931930 | PRKCQ                     | -2.5162928 | down | protein kinase C, theta                                  |
| 8097628 | HHIP                      | -2.516935  | down | hedgehog interacting protein                             |
| 8151952 | NPAL2                     | -2.5327394 | down | NIPA-like domain containing 2                            |
| 8103415 | C4orf18                   | -2.5339086 | down | chromosome 4 open reading frame 18                       |
| 8095303 | LPHN3                     | -2.5378976 | down | latrophilin 3                                            |
| 8107814 | ISOC1                     | -2.5399654 | down | isochorismatase domain containing 1                      |
| 8151475 | TPD52                     | -2.5409083 | down | tumor protein D52                                        |
| 8166355 | CNKSR2                    | -2.5554676 | down | connector enhancer of kinase suppressor of Ras 2         |
| 8162388 | OMD                       | -2.5616353 | down | osteomodulin                                             |
| 8109912 | KCNIP1                    | -2.5651915 | down | Kv channel interacting protein 1                         |
| 7954481 | SSPN                      | -2.5717344 | down | sarcospan (Kras oncogene-associated gene)                |
| 7980146 | NPC2                      | -2.5728505 | down | Niemann-Pick disease, type C2                            |
| 8113709 | LOX                       | -2.5751064 | down | lysyl oxidase                                            |
| 8120961 | C6orf117                  | -2.58831   | down | chromosome 6 open reading frame 117                      |
| 7903407 | AMY2B                     | -2.589043  | down | amylase, alpha 2B (pancreatic)                           |
| 8088550 | PRICKLE2                  | -2.591346  | down | prickle homolog 2 (Drosophila)                           |
| 7951351 | PDGFD                     | -2.5922506 | down | platelet derived growth factor D                         |
| 8102468 | PRSS12                    | -2.594784  | down | protease, serine, 12 (neurotrypsin, motopsin)            |
| 8003814 | ASPA                      | -2.5984356 | down | aspartoacylase (Canavan disease)                         |
| 7917954 | FRRS1                     | -2.598912  | down | ferric-chelate reductase 1                               |
| 7926545 | PLXDC2                    | -2.6167903 | down | plexin domain containing 2                               |
| 8138977 | DPY19L1                   | -2.6196647 | down | dpy-19-like 1 (C. elegans)                               |
| 8114778 | GCSH LOC730107            | -2.6316335 | down | glycine cleavage system protein H (aminomethyl carrier)  |
| 7954469 | RASSF8                    | -2.6411242 | down | Ras association (RalGDS/AF-6) domain family (N-terminal) |
| 7942964 | TMEM135                   | -2.653541  | down | transmembrane protein 135                                |
| 8129482 | SAMD3                     | -2.655974  | down | sterile alpha motif domain containing 3                  |
| 8128284 | EPHA7                     | -2.6570187 | down | EPH receptor A7                                          |
| 8144758 | ZDHHC2                    | -2.6784148 | down | zinc finger, DHHC-type containing 2                      |
| 8168466 | LOC100129513 LOC100134025 | -2.6831808 | down | similar to PRO0756   magnesium transporter 1             |
| 8104856 | SPEF2 LOC100134025        | -2.683479  | down | sperm flagellar 2   hypothetical protein LOC100134025    |
| 8013341 | MFAP4                     | -2.6901796 | down | microfibrillar-associated protein 4                      |
| 8041644 | PLEKHH2                   | -2.692711  | down | pleckstrin homology domain containing, family H (with)   |

Supplemental Table 1c  
eMSC vs. eSF

|         |                |            |      |                                                               |
|---------|----------------|------------|------|---------------------------------------------------------------|
| 7957338 | SYT1           | -2.71316   | down | synaptotagmin I                                               |
| 8135405 | GPR22          | -2.7220843 | down | G protein-coupled receptor 22                                 |
| 8169617 | PGRMC1         | -2.7244217 | down | progesterone receptor membrane component 1                    |
| 8082597 | COL6A6         | -2.7264678 | down | collagen type VI alpha 6                                      |
| 8094789 | LIMCH1         | -2.7320287 | down | LIM and calponin homology domains 1                           |
| 7922104 | GCSH LOC730107 | -2.7323089 | down | glycine cleavage system protein H (aminomethyl carrier)       |
| 7989199 | ALDH1A2        | -2.7386894 | down | aldehyde dehydrogenase 1 family, member A2                    |
| 7902808 | HS2ST1         | -2.7401762 | down | heparan sulfate 2-O-sulfotransferase 1                        |
| 7961440 | FLJ22662       | -2.7442966 | down |                                                               |
| 8089145 | ABI3BP         | -2.7506993 | down | ABI gene family, member 3 (NESH) binding protein              |
| 8162652 | CTSL2          | -2.7542622 | down | cathepsin L2                                                  |
| 8002999 | GCSH LOC730107 | -2.7585697 | down | glycine cleavage system protein H (aminomethyl carrier)       |
| 7976826 | SNORD114-26    | -2.7635748 | down | small nucleolar RNA, C/D box 114-26                           |
| 7957298 | NAV3           | -2.7731707 | down | neuron navigator 3                                            |
| 7926708 | THNSL1         | -2.7742796 | down | threonine synthase-like 1 ( <i>S. cerevisiae</i> )            |
| 8111101 | ANKH           | -2.7792974 | down | ankylosis, progressive homolog (mouse)                        |
| 7907657 | RALGPS2        | -2.7835948 | down | Ral GEF with PH domain and SH3 binding motif 2                |
| 8068353 | SLC5A3 MRPS6   | -2.7845619 | down | solute carrier family 5 (inositol transporters), member 6     |
| 8022674 | CDH2           | -2.8073099 | down | cadherin 2, type 1, N-cadherin (neuronal)                     |
| 8123303 | PACRG          | -2.8359106 | down | PARK2 co-regulated                                            |
| 8091537 | IGSF10         | -2.8419323 | down | immunoglobulin superfamily, member 10                         |
| 8103601 | DDX60L         | -2.848707  | down | DEAD (Asp-Glu-Ala-Asp) box polypeptide 60-like                |
| 8081288 | TMEM45A        | -2.8528566 | down | transmembrane protein 45A                                     |
| 8081959 | STXBP5L        | -2.856164  | down | syntaxin binding protein 5-like                               |
| 7947553 | LRRC4C         | -2.857907  | down | leucine rich repeat containing 4C                             |
| 7937772 | IGF2           | -2.8654819 | down | insulin-like growth factor 2 (somatomedin A)                  |
| 8155121 | NPR2           | -2.8848069 | down | natriuretic peptide receptor B/guanylate cyclase B (atrial)   |
| 8059878 | IQCA LOC100129 | -2.9185126 | down | IQ motif containing with AAA domain   hypothetical protein    |
| 8128894 | REV3L          | -2.9298532 | down | REV3-like, catalytic subunit of DNA polymerase zeta (yeast)   |
| 8140650 | SEMA3E         | -2.9331741 | down | sema domain, immunoglobulin domain (Ig), short basic          |
| 8022927 | SLC39A6        | -2.934382  | down | solute carrier family 39 (zinc transporter), member 6         |
| 8083471 | SGEF           | -2.9458275 | down | Src homology 3 domain-containing guanine nucleotide           |
| 7903414 | AMY2A AMY1A /  | -2.9527886 | down | amylase, alpha 2A (pancreatic)   amylase, alpha 1A (salivary) |

Supplemental Table 1c  
eMSC vs. eSF

|         |         |            |      |                                                         |
|---------|---------|------------|------|---------------------------------------------------------|
| 7925457 | RGS7    | -2.959834  | down | regulator of G-protein signaling 7                      |
| 8169145 | MUM1L1  | -2.964102  | down | melanoma associated antigen (mutated) 1-like 1          |
| 8083968 | NLGN1   | -2.9653366 | down | neuroligin 1                                            |
| 7958000 | CHPT1   | -2.9674933 | down | choline phosphotransferase 1                            |
| 8150428 | SFRP1   | -3.0254004 | down | secreted frizzled-related protein 1                     |
| 8080938 | MITF    | -3.0390928 | down | microphthalmia-associated transcription factor          |
| 7962274 | KIF21A  | -3.0398488 | down | kinesin family member 21A                               |
| 7962212 | PKP2    | -3.051184  | down | plakophilin 2                                           |
| 8111490 | PRLR    | -3.0597997 | down | prolactin receptor                                      |
| 7965941 | GLT8D2  | -3.0709858 | down | glycosyltransferase 8 domain containing 2               |
| 8160346 | PTPLAD2 | -3.0817268 | down | protein tyrosine phosphatase-like A domain containing   |
| 7951165 | PGR     | -3.0952022 | down | progesterone receptor                                   |
| 8122099 | ENPP1   | -3.1042657 | down | ectonucleotide pyrophosphatase/phosphodiesterase 1      |
| 8092169 | TNFSF10 | -3.1188369 | down | tumor necrosis factor (ligand) superfamily, member 10   |
| 8131666 | ITGB8   | -3.124336  | down | integrin, beta 8                                        |
| 8113641 | CDO1    | -3.1262503 | down | cysteine dioxygenase, type I                            |
| 8044225 | SULT1C4 | -3.143447  | down | sulfotransferase family, cytosolic, 1C, member 4        |
| 8150962 | TOX     | -3.1624212 | down | thymocyte selection-associated high mobility group bo   |
| 8059680 | HTR2B   | -3.1874542 | down | 5-hydroxytryptamine (serotonin) receptor 2B             |
| 8054281 | LONRF2  | -3.200171  | down | LON peptidase N-terminal domain and ring finger 2       |
| 7968154 | ATP8A2  | -3.2225847 | down | ATPase, aminophospholipid transporter-like, class I, ty |
| 7959893 | GPR133  | -3.2340968 | down | G protein-coupled receptor 133                          |
| 8068361 | SLC5A3  | -3.2365248 | down | solute carrier family 5 (inositol transporters), member |
| 7930714 | ATRNL1  | -3.2417023 | down | attractin-like 1                                        |
| 8177222 | CD24    | -3.242357  | down |                                                         |
| 8139087 | SFRP4   | -3.243047  | down | secreted frizzled-related protein 4                     |
| 7935776 | PRO1933 | -3.2483141 | down |                                                         |
| 8052382 | FANCL   | -3.2487218 | down | Fanconi anemia, complementation group L                 |
| 8088180 | WNT5A   | -3.26243   | down | wingless-type MMTV integration site family, member 5    |
| 7983638 | DTWD1   | -3.2769423 | down | DTW domain containing 1                                 |
| 7932584 | PRTFDC1 | -3.2863226 | down | phosphoribosyl transferase domain containing 1          |
| 8142471 | WNT2    | -3.288999  | down | wingless-type MMTV integration site family member 2     |
| 7965873 | IGF1    | -3.2933903 | down | insulin-like growth factor 1 (somatomedin C)            |

Supplemental Table 1c  
eMSC vs. eSF

|         |                 |            |      |                                                                                       |
|---------|-----------------|------------|------|---------------------------------------------------------------------------------------|
| 8107594 | SNCAIP          | -3.3036582 | down | synuclein, alpha interacting protein (synphilin)                                      |
| 7977933 | SLC7A8          | -3.3197718 | down | solute carrier family 7 (cationic amino acid transporter)                             |
| 8173933 | PCDH19          | -3.3342843 | down | protocadherin 19                                                                      |
| 8041508 | QPCT            | -3.365722  | down | glutaminyl-peptide cyclotransferase (glutaminyl cyclase)                              |
| 8099593 | KCNIP4          | -3.3666427 | down | Kv channel interacting protein 4                                                      |
| 7923578 | FMOD            | -3.3734398 | down | fibromodulin                                                                          |
| 8008609 | ANKFN1          | -3.3925338 | down | ankyrin-repeat and fibronectin type III domain containing                             |
| 7962375 | PRICKLE1        | -3.4098704 | down | prickle homolog 1 (Drosophila)                                                        |
| 8063729 | EDN3            | -3.4326637 | down | endothelin 3                                                                          |
| 8107823 | ADAMTS19        | -3.4616218 | down | ADAM metallopeptidase with thrombospondin type 1 motif                                |
| 7958352 | BTBD11          | -3.4908156 | down | BTB (POZ) domain containing 11                                                        |
| 8137485 | DPP6            | -3.496906  | down | dipeptidyl-peptidase 6                                                                |
| 7902425 | ST6GALNAC3      | -3.5042655 | down | ST6 (alpha-N-acetyl-neuraminyl-2,3-beta-galactosyl-1,6-galactose                      |
| 8161423 | KGFLP2 KGFLP1 f | -3.5089965 | down | keratinocyte growth factor-like protein 2   keratinocyte growth factor-like protein 2 |
| 8161455 | KGFLP2 KGFLP1 f | -3.5163457 | down | keratinocyte growth factor-like protein 2   keratinocyte growth factor-like protein 2 |
| 7917255 | SSX2IP          | -3.5235357 | down | synovial sarcoma, X breakpoint 2 interacting protein                                  |
| 8155487 | KGFLP1 KGFLP2 f | -3.526204  | down | keratinocyte growth factor-like protein 1   keratinocyte growth factor-like protein 1 |
| 8122660 | UST             | -3.527889  | down | uronyl-2-sulfotransferase                                                             |
| 8080964 | GLT8D4          | -3.5376415 | down | glycosyltransferase 8 domain containing 4                                             |
| 7946454 | SCUBE2          | -3.5558124 | down | signal peptide, CUB domain, EGF-like 2                                                |
| 7922130 | DPT             | -3.5766788 | down | dermatopontin                                                                         |
| 7957260 | GLIPR1          | -3.5767138 | down | GLI pathogenesis-related 1 (glioma)                                                   |
| 8174029 | TAF7L           | -3.5819721 | down | TAF7-like RNA polymerase II, TATA box binding protein                                 |
| 8138789 | JAZF1           | -3.6005058 | down | JAZF zinc finger 1                                                                    |
| 8152522 | ENPP2           | -3.6319048 | down | ectonucleotide pyrophosphatase/phosphodiesterase 2                                    |
| 7964987 | KCNC2           | -3.6759121 | down | potassium voltage-gated channel, Shaw-related subfamily 2                             |
| 8004955 | LOC284033       | -3.6905363 | down |                                                                                       |
| 7976814 | SNORD114-2      | -3.6956022 | down | small nucleolar RNA, C/D box 114-2                                                    |
| 8103399 | PDGFC           | -3.7138798 | down | platelet derived growth factor C                                                      |
| 8096116 | AGPAT9          | -3.7545593 | down | 1-acylglycerol-3-phosphate O-acyltransferase 9                                        |
| 7976810 | SNORD113-3      | -3.7663043 | down | small nucleolar RNA, C/D box 113-3                                                    |
| 8137250 | GIMAP2          | -3.7756329 | down | GTPase, IMAP family member 2                                                          |
| 8056611 | LRP2            | -3.8227642 | down | low density lipoprotein-related protein 2                                             |

Supplemental Table 1c  
eMSC vs. eSF

|         |              |            |      |                                                          |
|---------|--------------|------------|------|----------------------------------------------------------|
| 7976812 | SNORD113-4   | -3.8859015 | down | small nucleolar RNA, C/D box 113-4                       |
| 8052355 | EFEMP1       | -3.889878  | down | EGF-containing fibulin-like extracellular matrix protein |
| 7921099 | CRABP2       | -3.9014454 | down | cellular retinoic acid binding protein 2                 |
| 8176234 | CLIC2        | -3.9131584 | down | chloride intracellular channel 2                         |
| 8151999 | RGS22        | -4.0088735 | down | regulator of G-protein signaling 22                      |
| 7952341 | ASAM         | -4.0235605 | down | adipocyte-specific adhesion molecule                     |
| 8100578 | EPHA5        | -4.047006  | down | EPH receptor A5                                          |
| 8154100 | VLDLR        | -4.0677013 | down | very low density lipoprotein receptor                    |
| 8127854 | ME1          | -4.0994987 | down | malic enzyme 1, NADP(+)-dependent, cytosolic             |
| 7961900 | ITPR2        | -4.182877  | down | inositol 1,4,5-triphosphate receptor, type 2             |
| 8111993 | FGF10        | -4.2004323 | down | fibroblast growth factor 10                              |
| 7980485 | DIO2         | -4.229441  | down | deiodinase, iodothyronine, type II                       |
| 8066822 | SULF2        | -4.3506527 | down | sulfatase 2                                              |
| 7954899 | CNTN1        | -4.6336703 | down | contactin 1                                              |
| 7967993 | FGF9         | -4.6853166 | down | fibroblast growth factor 9 (glia-activating factor)      |
| 8175696 | GABRA3       | -4.7933373 | down | gamma-aminobutyric acid (GABA) A receptor, alpha 3       |
| 8111998 | HCN1         | -4.830883  | down | hyperpolarization activated cyclic nucleotide-gated pot  |
| 8056151 | PLA2R1       | -4.8743978 | down | phospholipase A2 receptor 1, 180kDa                      |
| 8140534 | SEMA3C       | -4.8934417 | down | sema domain, immunoglobulin domain (Ig), short basic     |
| 7917304 | MCOLN3       | -4.935482  | down | mucolipin 3                                              |
| 8111255 | CDH10        | -5.0371003 | down | cadherin 10, type 2 (T2-cadherin)                        |
| 8161755 | ALDH1A1      | -5.2886124 | down | aldehyde dehydrogenase 1 family, member A1               |
| 8053315 | LRRTM4       | -5.32911   | down | leucine rich repeat transmembrane neuronal 4             |
| 8123744 | F13A1        | -5.3918233 | down | coagulation factor XIII, A1 polypeptide                  |
| 8174670 | RP13-347D8.3 | -5.5966787 | down | KIAA1210 protein                                         |
| 8163672 | DIPAS        | -5.623481  | down | DIPLA1-antisense expressed                               |
| 8160168 | FREM1        | -5.7075853 | down | FRAS1 related extracellular matrix 1                     |
| 7898057 | PDPN         | -5.913045  | down | podoplanin                                               |
| 8155898 | PCSK5        | -5.955172  | down | proprotein convertase subtilisin/kexin type 5            |
| 7957861 | TMEM16D      | -6.268341  | down | transmembrane protein 16D                                |
| 8140556 | HGF          | -6.2717314 | down | hepatocyte growth factor (hepapoietin A; scatter facto   |
| 8120967 | NT5E         | -6.524017  | down | 5'-nucleotidase, ecto (CD73)                             |
| 8121749 | GJA1         | -6.5280848 | down | gap junction protein, alpha 1, 43kDa                     |

Supplemental Table 1c  
eMSC vs. eSF

|         |         |            |      |                                                          |
|---------|---------|------------|------|----------------------------------------------------------|
| 8089714 | LSAMP   | -6.6095963 | down | limbic system-associated membrane protein                |
| 8081001 | ROBO2   | -6.727335  | down | roundabout, axon guidance receptor, homolog 2 (Dros      |
| 7933194 | CXCL12  | -7.009148  | down | chemokine (C-X-C motif) ligand 12 (stromal cell-derive   |
| 8102587 | C4orf31 | -7.619471  | down | chromosome 4 open reading frame 31                       |
| 8107798 | SLC27A6 | -7.7193003 | down | solute carrier family 27 (fatty acid transporter), membe |
| 7897522 | RBP7    | -8.294218  | down | retinol binding protein 7, cellular                      |
| 8162373 | OGN     | -8.776683  | down | osteoglycin                                              |
| 8167592 | PAGE4   | -9.136015  | down | P antigen family, member 4 (prostate associated)         |
| 8095080 | PDGFRA  | -9.456953  | down | platelet-derived growth factor receptor, alpha polypep   |
| 8083494 | MME     | -11.776522 | down | membrane metallo-endopeptidase                           |
| 7972239 | SLITRK6 | -12.137406 | down | SLIT and NTRK-like family, member 6                      |
| 8126784 | PLA2G7  | -15.874383 | down | phospholipase A2, group VII (platelet-activating factor  |

Supplemental Table 2a  
eEPPCOS vs. eEPCtrl

| Transcripts Cluster Id | Genesymbol        | eEPPCOS vs. eEPCtrl | Regulation | Genedescription                                                                     |
|------------------------|-------------------|---------------------|------------|-------------------------------------------------------------------------------------|
| 8108256                | MYOT              | 3.91                | up         | myotilin                                                                            |
| 7957140                | LGR5              | 3.87                | up         | leucine-rich repeat-containing G protein-coupled receptor                           |
| 7932407                | ST8SIA6           | 3.78                | up         | ST8 alpha-N-acetyl-neuraminide alpha-2,8-sialyltransferase                          |
| 8157446                | ORM1              | 3.15                | up         | orosomucoid 1                                                                       |
| 7965226                | RASSF9            | 3.02                | up         | Ras association (RalGDS/AF-6) domain family (N-terminal)                            |
| 7901048                | SNORD46           | 3.01                | up         | small nucleolar RNA, C/D box 46                                                     |
| 8108251                | NPY6R             | 2.99                | up         | neuropeptide Y receptor Y6 (pseudogene)                                             |
| 8134339                | PEG10             | 2.90                | up         | paternally expressed 10                                                             |
| 8157450                | ORM2              | 2.88                | up         | orosomucoid 2                                                                       |
| 8017061                | TEX14             | 2.85                | up         | testis expressed 14                                                                 |
| 8092165                | GHSR              | 2.79                | up         | growth hormone secretagogue receptor                                                |
| 7932420                | PTPLA             | 2.72                | up         | protein tyrosine phosphatase-like (proline instead of catalytic)                    |
| 8019831                | CLUL1             | 2.70                | up         | clusterin-like 1 (retinal)                                                          |
| 8077270                | CHL1              | 2.64                | up         | cell adhesion molecule with homology to L1CAM (close homolog)                       |
| 8112274                | ELOVL7            | 2.52                | up         | ELOVL family member 7, elongation of long chain fatty acid synthase                 |
| 8017057                | C17orf47          | 2.50                | up         | chromosome 17 open reading frame 47                                                 |
| 8140650                | SEMA3E            | 2.48                | up         | sema domain, immunoglobulin domain (Ig), short basic cytoplasmic tail               |
| 8120679                | DDX43             | 2.46                | up         | DEAD (Asp-Glu-Ala-Asp) box polypeptide 43                                           |
| 8124650                | UBD GABBR1        | 2.43                | up         | ubiquitin D   gamma-aminobutyric acid (GABA) B receptor                             |
| 8091243                | PCOLCE2           | 2.41                | up         | procollagen C-endopeptidase enhancer 2                                              |
| 7902738                | CLCA4             | 2.40                | up         | chloride channel, calcium activated, family member 4                                |
| 8141843                | LOC100133005 LOC1 | 2.39                | up         | hypothetical protein FLJ21767   similar to RAS p21 protein                          |
| 8178295                | UBD GABBR1        | 2.38                | up         | ubiquitin D   gamma-aminobutyric acid (GABA) B receptor                             |
| 8131803                | IL6               | 2.35                | up         | interleukin 6 (interferon, beta 2)                                                  |
| 7939237                | C11orf41          | 2.31                | up         | chromosome 11 open reading frame 41                                                 |
| 7930714                | ATRNL1            | 2.30                | up         | attractin-like 1                                                                    |
| 8059376                | SERPINE2          | 2.25                | up         | serpin peptidase inhibitor, clade E (nexin, plasminogen activator inhibitor type 1) |
| 8046428                | RAPGEF4           | 2.25                | up         | Rap guanine nucleotide exchange factor (GEF) 4                                      |
| 7931748                | IDI2              | 2.23                | up         | isopentenyl-diphosphate delta isomerase 2                                           |
| 8105596                | RGS7BP            | 2.21                | up         | regulator of G-protein signaling 7 binding protein                                  |
| 8019709                | RNU2 RNU2B WDR74  | 2.15                | up         | RNA, U2 small nuclear   RNA, U2B small nuclear   WD repeat domain                   |
| 8006433                | CCL2              | 2.14                | up         | chemokine (C-C motif) ligand 2                                                      |



Supplemental Table 2a  
eEPPCOS vs. eEPCtrl

|         |                     |      |    |                                                         |
|---------|---------------------|------|----|---------------------------------------------------------|
| 7917850 | ARHGAP29            | 2.13 | up | Rho GTPase activating protein 29                        |
| 7922969 | PDC                 | 2.12 | up | phosducin                                               |
| 8160912 | C9orf131            | 2.12 | up | chromosome 9 open reading frame 131                     |
| 8170635 | ZNF275              | 2.12 | up | zinc finger protein 275                                 |
| 8114856 | PLAC8L1             | 2.12 | up | PLAC8-like 1                                            |
| 8019707 | RNU2 RNU2B WDR74    | 2.11 | up | RNA, U2 small nuclear   RNA, U2B small nuclear   WD re  |
| 8005204 | 144A CCDC144B CCD1  | 2.11 | up | coiled-coil domain containing 144A   coiled-coil domain |
| 8019639 | RNU2 RNU2B WDR74    | 2.11 | up | RNA, U2 small nuclear   RNA, U2B small nuclear   WD re  |
| 8019705 | RNU2 RNU2B WDR74    | 2.11 | up | RNA, U2 small nuclear   RNA, U2B small nuclear   WD re  |
| 8019637 | RNU2 RNU2B WDR74    | 2.11 | up | RNA, U2 small nuclear   RNA, U2B small nuclear   WD re  |
| 8019641 | RNU2 RNU2B WDR74    | 2.11 | up | RNA, U2 small nuclear   RNA, U2B small nuclear   WD re  |
| 8019635 | RNU2 RNU2B WDR74    | 2.11 | up | RNA, U2 small nuclear   RNA, U2B small nuclear   WD re  |
| 8019631 | RNU2 RNU2B WDR74    | 2.11 | up | RNA, U2 small nuclear   RNA, U2B small nuclear   WD re  |
| 8019703 | RNU2 RNU2B WDR74    | 2.11 | up | RNA, U2 small nuclear   RNA, U2B small nuclear   WD re  |
| 8019633 | RNU2 RNU2B WDR74    | 2.11 | up | RNA, U2 small nuclear   RNA, U2B small nuclear   WD re  |
| 8135585 | LOC100128868        | 2.09 | up | testin-related protein TRG                              |
| 8054200 | LYG2                | 2.09 | up | lysozyme G-like 2                                       |
| 8096744 | CYP2U1              | 2.08 | up | cytochrome P450, family 2, subfamily U, polypeptide 1   |
| 7932453 | NEBL                | 2.08 | up | nebulin                                                 |
| 8021301 | RAB27B              | 2.06 | up |                                                         |
| 7968632 | RP11-251J8.3        | 2.06 | up | hypothetical LOC646871                                  |
| 8155591 | 20B RP11-195B21.3 C | 2.05 | up | ankyrin repeat domain 20B   hypothetical LOC644249      |
| 8019802 | RNU2 RNU2B WDR74    | 2.05 | up | RNA, U2 small nuclear   RNA, U2B small nuclear   WD re  |
| 8124562 | ZNF323              | 2.04 | up | zinc finger protein 323                                 |
| 8083743 | ARL14               | 2.04 | up | ADP-ribosylation factor-like 14                         |
| 8100464 | NMU                 | 2.03 | up | neuromedin U                                            |
| 8066745 | ZNF334              | 2.02 | up | zinc finger protein 334                                 |
| 8172022 | TMEM47              | 2.02 | up | transmembrane protein 47                                |
| 8045688 | TNFAIP6             | 2.01 | up | tumor necrosis factor, alpha-induced protein 6          |
| 8100378 | LOC402176           | 2.01 | up | similar to 60S ribosomal protein L21                    |
| 8083839 | GPR160              | 2.00 | up | G protein-coupled receptor 160                          |
| 8053741 | ANKRD20A3 ANKRD20   | 2.00 | up | ankyrin repeat domain 20B   ankyrin repeat domain 20 f  |
| 8140686 | SEMA3D              | 2.00 | up | sema domain, immunoglobulin domain (Ig), short basic c  |

Supplemental Table 2a  
eEPPCOS vs. eEPCtrl

|         |                      |      |    |                                                              |
|---------|----------------------|------|----|--------------------------------------------------------------|
| 8013272 | 144A CCDC144B CCD    | 1.87 | up | coiled-coil domain containing 144A   coiled-coil domain      |
| 8073192 | UQCRFS1              | 1.86 | up | ubiquinol-cytochrome c reductase, Rieske iron-sulfur pol     |
| 8116983 | CD83                 | 1.80 | up |                                                              |
| 7981960 | SNRPN SNORD116-6     | 1.74 | up | small nuclear ribonucleoprotein polypeptide N   small nu     |
| 8001410 | AKTIP                | 1.67 | up | AKT interacting protein                                      |
| 8149248 | LRLE1 LOC100127885   | 1.63 | up | liver-related low express protein 1   similar to liver-relat |
| 7981951 | SNRPN SNORD116-2     | 1.61 | up | small nuclear ribonucleoprotein polypeptide N   small nu     |
| 8147273 | LC26A7 LOC10013074   | 1.61 | up | solute carrier family 26, member 7   similar to hCG2008!     |
| 8077366 | LRRN1                | 1.56 | up | leucine rich repeat neuronal 1                               |
| 7926807 | PDSS1                | 1.56 | up | prenyl (decaprenyl) diphosphate synthase, subunit 1          |
| 8165642 | TMEM203              | 1.55 | up | transmembrane protein 203                                    |
| 7936673 | RGS10                | 1.55 | up | regulator of G-protein signaling 10                          |
| 7926545 | PLXDC2               | 1.54 | up | plexin domain containing 2                                   |
| 8122554 | RAB32                | 1.53 | up |                                                              |
| 8050176 | ITGB1BP1             | 1.52 | up | integrin beta 1 binding protein 1                            |
| 8146794 | DEPDC2               | 1.51 | up | DEP domain containing 2                                      |
| 8034342 | ZNF625 ZNF20         | 1.51 | up | zinc finger protein 625   zinc finger protein 20             |
| 8083779 | SERPINI1             | 1.51 | up | serpin peptidase inhibitor, clade I (neuroserpin), membe     |
| 8054135 | MGAT4A               | 1.50 | up | mannosyl (alpha-1,3-)-glycoprotein beta-1,4-N-acetylglu      |
| 7947248 | KIF18A               | 1.50 | up | kinesin family member 18A                                    |
| 8127563 | COL12A1              | 1.49 | up | collagen, type XII, alpha 1                                  |
| 8151032 | GGH                  | 1.49 | up | gamma-glutamyl hydrolase (conjugase, folylpolygamma          |
| 8055702 | NMI                  | 1.44 | up | N-myc (and STAT) interactor                                  |
| 7968789 | C13orf15             | 1.42 | up | chromosome 13 open reading frame 15                          |
| 7904478 | LOC51152 LOC1001290  | 1.41 | up | melanoma antigen   hypothetical protein LOC10012903!         |
| 8161375 | LOC100129030 LOC511  | 1.41 | up | hypothetical protein LOC100129030   melanoma antigen         |
| 8155453 | LOC100129030 LOC511  | 1.40 | up | hypothetical protein LOC100129030   melanoma antigen         |
| 8122144 | SNORA33              | 1.39 | up | small nucleolar RNA, H/ACA box 33                            |
| 8130578 | SNORA20              | 1.38 | up | small nucleolar RNA, H/ACA box 20                            |
| 7905548 | SPRR3                | 1.37 | up | small proline-rich protein 3                                 |
| 7971541 | SUCLA2               | 1.37 | up | succinate-CoA ligase, ADP-forming, beta subunit              |
| 7922268 | KIFAP3               | 1.35 | up | kinesin-associated protein 3                                 |
| 8067839 | LOC10132771 LOC10013 | 1.35 | up | fibroblast growth factor 7 pseudogene 2   similar to kerat   |

Supplemental Table 2a  
eEPPCOS vs. eEPCtrl

|         |                    |      |    |                                                                  |
|---------|--------------------|------|----|------------------------------------------------------------------|
| 7974229 | KLHDC2             | 1.34 | up | kelch domain containing 2                                        |
| 8092169 | TNFSF10            | 1.34 | up | tumor necrosis factor (ligand) superfamily, member 10            |
| 8179055 | ZNRD1              | 1.33 | up | zinc ribbon domain containing 1                                  |
| 7960896 | LOC650293 OR7E125F | 1.33 | up | seven transmembrane helix receptor   olfactory receptor          |
| 8097857 | MND1               | 1.33 | up | meiotic nuclear divisions 1 homolog ( <i>S. cerevisiae</i> )     |
| 8152340 | NUDCD1             | 1.33 | up | NudC domain containing 1                                         |
| 8161423 | FGF7P2 LOC10013277 | 1.32 | up | keratinocyte growth factor-like protein 2   keratinocyte ;       |
| 8059708 | SNORA75            | 1.31 | up | small nucleolar RNA, H/ACA box 75                                |
| 8161455 | FGF7P2 LOC10013277 | 1.31 | up | keratinocyte growth factor-like protein 2   keratinocyte ;       |
| 8135587 | CAV2               | 1.31 | up | caveolin 2                                                       |
| 8155487 | FGF7P2 LOC10013277 | 1.31 | up | keratinocyte growth factor-like protein 1   keratinocyte ;       |
| 8147132 | CA2                | 1.31 | up | carbonic anhydrase II                                            |
| 7951408 | COP1               | 1.31 | up | caspase-1 dominant-negative inhibitor pseudo-ICE                 |
| 8019842 | TYMS               | 1.31 | up | thymidylate synthetase                                           |
| 7948900 | SNORD30            | 1.29 | up | small nucleolar RNA, C/D box 30                                  |
| 8058927 | TMBIM1             | 1.27 | up | transmembrane BAX inhibitor motif containing 1                   |
| 8042144 | REL                | 1.27 | up | v-rel reticuloendotheliosis viral oncogene homolog (avian)       |
| 7986394 | LRRC28             | 1.26 | up | leucine rich repeat containing 28                                |
| 8023191 | SMAD2              | 1.25 | up | SMAD family member 2                                             |
| 8098556 | CCDC111            | 1.25 | up | coiled-coil domain containing 111                                |
| 8147516 | MATN2              | 1.22 | up | matrilin 2                                                       |
| 7923086 | ASPM               | 1.22 | up | asp (abnormal spindle) homolog, microcephaly associated          |
| 8057056 | TTN                | 1.22 | up | titin                                                            |
| 7965855 | NUP37              | 1.21 | up | nucleoporin 37kDa                                                |
| 8099807 | GAFA3              | 1.21 | up | FGF-2 activity-associated protein 3                              |
| 8122705 | PCMT1              | 1.21 | up | protein-L-isoaspartate (D-aspartate) O-methyltransferase         |
| 8017597 | hCG_1793136        | 1.21 | up | similar to ribosomal protein L31                                 |
| 7943530 | GRIA4              | 1.20 | up | glutamate receptor, ionotropic, AMPA 4                           |
| 7903407 | AMY2B              | 1.19 | up | amylase, alpha 2B (pancreatic)                                   |
| 7916570 | OMA1 DAB1          | 1.19 | up | OMA1 homolog, zinc metallopeptidase ( <i>S. cerevisiae</i> )   c |
| 8037053 | CEACAM7            | 1.17 | up | carcinoembryonic antigen-related cell adhesion molecule 7        |
| 7939559 | TSPAN18            | 1.17 | up | tetraspanin 18                                                   |
| 8096538 | RAP1GDS1           | 1.17 | up | RAP1, GTP-GDP dissociation stimulator 1                          |

Supplemental Table 2a  
eEPPCOS vs. eEPCtrl

|         |                    |      |    |                                                           |
|---------|--------------------|------|----|-----------------------------------------------------------|
| 8171248 | KAL1               | 1.17 | up | Kallmann syndrome 1 sequence                              |
| 7937020 | MKI67              | 1.17 | up | antigen identified by monoclonal antibody Ki-67           |
| 7929334 | CEP55              | 1.16 | up | centrosomal protein 55kDa                                 |
| 8157691 | LOC729012          | 1.16 | up | similar to Spindle and kinetochore-associated protein 2 ( |
| 8101322 | MOP-1              | 1.16 | up |                                                           |
| 7945991 | OR51E2             | 1.15 | up | olfactory receptor, family 51, subfamily E, member 2      |
| 8092265 | MRPL47             | 1.15 | up | mitochondrial ribosomal protein L47                       |
| 8175177 | MBNL3              | 1.15 | up | muscleblind-like 3 (Drosophila)                           |
| 8120239 | TMEM14A            | 1.15 | up | transmembrane protein 14A                                 |
| 7935180 | PDLIM1             | 1.15 | up | PDZ and LIM domain 1 (elfin)                              |
| 7954293 | PDE3A              | 1.15 | up | phosphodiesterase 3A, cGMP-inhibited                      |
| 7917037 | CRYZ               | 1.15 | up | crystallin, zeta (quinone reductase)                      |
| 7983630 | FGF7               | 1.14 | up | fibroblast growth factor 7 (keratinocyte growth factor)   |
| 8148040 | MAL2               | 1.14 | up | mal, T-cell differentiation protein 2                     |
| 8166784 | TSPAN7             | 1.14 | up | tetraspanin 7                                             |
| 7950933 | NOX4               | 1.14 | up | NADPH oxidase 4                                           |
| 8066528 | PIGT               | 1.13 | up | phosphatidylinositol glycan anchor biosynthesis, class T  |
| 8043504 | MAL                | 1.13 | up | mal, T-cell differentiation protein                       |
| 8042788 | ACTG2              | 1.13 | up | actin, gamma 2, smooth muscle, enteric                    |
| 8149955 | PBK                | 1.13 | up | PDZ binding kinase                                        |
| 7984540 | KIF23              | 1.12 | up | kinesin family member 23                                  |
| 8079237 | KIF15              | 1.12 | up | kinesin family member 15                                  |
| 8007420 | AOC3               | 1.12 | up | amine oxidase, copper containing 3 (vascular adhesion p   |
| 8000636 | 00132247 DKFZp547E | 1.11 | up | similar to nuclear pore complex interacting protein   KIA |
| 7972217 | SPRY2              | 1.11 | up | sprouty homolog 2 (Drosophila)                            |
| 8017843 | SLC16A6            | 1.11 | up | solute carrier family 16, member 6 (monocarboxylic acid   |
| 8122365 | GPR126             | 1.11 | up | G protein-coupled receptor 126                            |
| 7982757 | CASC5              | 1.10 | up | cancer susceptibility candidate 5                         |
| 7938364 | WEE1               | 1.10 | up |                                                           |
| 8120961 | C6orf117           | 1.09 | up | chromosome 6 open reading frame 117                       |
| 7989708 | MTFMT              | 1.09 | up | mitochondrial methionyl-tRNA formyltransferase            |
| 7929258 | KIF11              | 1.09 | up | kinesin family member 11                                  |
| 7952205 | MCAM               | 1.09 | up | melanoma cell adhesion molecule                           |

Supplemental Table 2a  
ePPCOS vs. eEPCtrl

|         |                     |      |    |                                                          |
|---------|---------------------|------|----|----------------------------------------------------------|
| 7958031 | C12orf48            | 1.08 | up | chromosome 12 open reading frame 48                      |
| 8132318 | ANLN                | 1.08 | up | anillin, actin binding protein                           |
| 8131944 | NFE2L3              | 1.08 | up | nuclear factor (erythroid-derived 2)-like 3              |
| 8177931 | C6orf205            | 1.08 | up | chromosome 6 open reading frame 205                      |
| 7983478 | C15orf48            | 1.08 | up | chromosome 15 open reading frame 48                      |
| 8118069 | C6orf205            | 1.08 | up | chromosome 6 open reading frame 205                      |
| 7929438 | HELLS               | 1.07 | up | helicase, lymphoid-specific                              |
| 7923426 | UBE2T               | 1.07 | up | ubiquitin-conjugating enzyme E2T (putative)              |
| 8121916 | RSPO3               | 1.07 | up | R-spondin 3 homolog ( <i>Xenopus laevis</i> )            |
| 8171802 | ACOT9               | 1.07 | up | acyl-CoA thioesterase 9                                  |
| 8116724 | FARS2               | 1.07 | up | phenylalanyl-tRNA synthetase 2, mitochondrial            |
| 8014974 | TOP2A               | 1.06 | up | topoisomerase (DNA) II alpha 170kDa                      |
| 8109712 | HMMR                | 1.06 | up | hyaluronan-mediated motility receptor (RHAMM)            |
| 7923991 | PLXNA2              | 1.06 | up | plexin A2                                                |
| 8135235 | PMPCB               | 1.06 | up | peptidase (mitochondrial processing) beta                |
| 8138289 | ETV1                | 1.05 | up | ets variant gene 1                                       |
| 8022902 | C18orf37            | 1.05 | up | chromosome 18 open reading frame 37                      |
| 8057377 | CCDC141 LOC285026   | 1.05 | up | coiled-coil domain containing 141   hypothetical protein |
| 8025601 | ICAM1               | 1.05 | up | intercellular adhesion molecule 1 (CD54), human rhinovi  |
| 8121911 | C6orf173            | 1.05 | up | chromosome 6 open reading frame 173                      |
| 7935776 | PRO1933             | 1.05 | up |                                                          |
| 7946579 | LYVE1               | 1.05 | up | lymphatic vessel endothelial hyaluronan receptor 1       |
| 8143957 | RHEB                | 1.05 | up | Ras homolog enriched in brain                            |
| 7970513 | C13orf3             | 1.05 | up | chromosome 13 open reading frame 3                       |
| 8061579 | TPX2                | 1.05 | up |                                                          |
| 7972826 | C13orf29            | 1.05 | up | chromosome 13 open reading frame 29                      |
| 8091799 | C3orf57 LOC10012928 | 1.05 | up | chromosome 3 open reading frame 57   hypothetical pr     |
| 8125775 | C6orf125            | 1.04 | up | chromosome 6 open reading frame 125                      |
| 8006779 | ARHGAP23            | 1.04 | up | Rho GTPase activating protein 23                         |
| 8056611 | LRP2                | 1.04 | up | low density lipoprotein-related protein 2                |
| 8102560 | MAD2L1              | 1.04 | up | MAD2 mitotic arrest deficient-like 1 (yeast)             |
| 8156905 | TMEFF1              | 1.04 | up | transmembrane protein with EGF-like and two follistatin  |
| 7944082 | TAGLN               | 1.03 | up | transgelin                                               |

Supplemental Table 2a  
eEPPCOS vs. eEPCtrl

|         |                    |       |      |                                                            |
|---------|--------------------|-------|------|------------------------------------------------------------|
| 7915286 | PPT1               | 1.03  | up   | palmitoyl-protein thioesterase 1 (ceroid-lipofuscinosis, n |
| 8015323 | KRT13 GUCA1B       | 1.03  | up   | keratin 13   guanylate cyclase activator 1B (retina)       |
| 7977615 | RNASE1             | 1.03  | up   | ribonuclease, RNase A family, 1 (pancreatic)               |
| 8008588 | HLF                | 1.03  | up   | hepatic leukemia factor                                    |
| 8139057 | ELMO1              | 1.03  | up   | engulfment and cell motility 1                             |
| 8178811 | 0133583 LOC1001336 | 1.03  | up   |                                                            |
| 8005955 | SNORD42A           | 1.02  | up   | small nucleolar RNA, C/D box 42A                           |
| 8146957 | PI15               | 1.02  | up   | peptidase inhibitor 15                                     |
| 8077323 | CNTN4              | 1.01  | up   | contactin 4                                                |
| 8040655 | SELI               | 1.01  | up   | selenoprotein I                                            |
| 7989647 | KIAA0101           | 1.01  | up   |                                                            |
| 8127637 | TMEM30A            | 1.01  | up   | transmembrane protein 30A                                  |
| 8019857 | NDC80              | 1.01  | up   |                                                            |
| 7914218 | TAF12              | 1.01  | up   |                                                            |
| 8135218 | LRRC17             | 1.01  | up   | leucine rich repeat containing 17                          |
| 8155214 | MELK               | 1.00  | up   | maternal embryonic leucine zipper kinase                   |
| 7909789 | TGFB2              | -1.00 | down | transforming growth factor, beta 2                         |
| 8170990 | SNORA36A           | -1.00 | down | small nucleolar RNA, H/ACA box 36A                         |
| 7903393 | S1PR1              | -1.01 | down | sphingosine-1-phosphate receptor 1                         |
| 7902808 | HS2ST1             | -1.01 | down | heparan sulfate 2-O-sulfotransferase 1                     |
| 8055911 | LOC100129449       | -1.01 | down | PRO2055                                                    |
| 8154100 | VLDLR              | -1.01 | down | very low density lipoprotein receptor                      |
| 8097679 | LSM6               | -1.01 | down |                                                            |
| 8173179 | RP11-278E11.2      | -1.01 | down | ubiquinol-cytochrome c reductase binding protein pseud     |
| 8092328 | MCCC1              | -1.02 | down | methylcrotonoyl-Coenzyme A carboxylase 1 (alpha)           |
| 8105828 | CCNB1              | -1.02 | down | cyclin B1                                                  |
| 8179224 | C6orf205           | -1.02 | down | chromosome 6 open reading frame 205                        |
| 7906930 | NUF2               | -1.02 | down |                                                            |
| 7976812 | SNORD113-4         | -1.02 | down | small nucleolar RNA, C/D box 113-4                         |
| 8180003 | 0133583 LOC1001336 | -1.03 | down |                                                            |
| 8126853 | C6orf138           | -1.03 | down | chromosome 6 open reading frame 138                        |
| 8162880 | MRPL50             | -1.03 | down | mitochondrial ribosomal protein L50                        |
| 8113220 | ELL2               | -1.04 | down | elongation factor, RNA polymerase II, 2                    |

Supplemental Table 2a  
eEPPCOS vs. eEPCtrl

|         |                |       |      |                                                           |
|---------|----------------|-------|------|-----------------------------------------------------------|
| 8155849 | ANXA1          | -1.04 | down | annexin A1                                                |
| 8092578 | ETV5           | -1.04 | down | ets variant gene 5 (ets-related molecule)                 |
| 7971866 | DIAPH3         | -1.04 | down | diaphanous homolog 3 (Drosophila)                         |
| 8045587 | ACVR2A         | -1.04 | down | activin A receptor, type IIA                              |
| 8085145 | RAD18          | -1.04 | down |                                                           |
| 7925525 | CEP170         | -1.04 | down | centrosomal protein 170kDa                                |
| 8078544 | MLH1           | -1.05 | down | mutL homolog 1, colon cancer, nonpolyposis type 2 (E. c   |
| 8174189 | TMSL8 MG39900  | -1.05 | down | thymosin-like 8   thymosin beta15b                        |
| 8152617 | HAS2           | -1.05 | down | hyaluronan synthase 2                                     |
| 8081867 | C3orf1         | -1.05 | down | chromosome 3 open reading frame 1                         |
| 8055862 | ARL5A          | -1.05 | down | ADP-ribosylation factor-like 5A                           |
| 8054580 | BUB1           | -1.06 | down |                                                           |
| 7950810 | SYTL2          | -1.06 | down | synaptotagmin-like 2                                      |
| 7982358 | ARHGAP11A      | -1.06 | down | Rho GTPase activating protein 11A                         |
| 7917516 | GBP1 LOC400759 | -1.06 | down | guanylate binding protein 1, interferon-inducible, 67kDa  |
| 7977270 | LOC388022      | -1.06 | down | hypothetical gene supported by AK131040                   |
| 8155268 | POLR1E         | -1.06 | down | polymerase (RNA) I polypeptide E, 53kDa                   |
| 8056963 | LOC100129455   | -1.06 | down |                                                           |
| 7922137 | NME7           | -1.06 | down | non-metastatic cells 7, protein expressed in (nucleoside- |
| 8073334 | RBX1           | -1.06 | down | ring-box 1                                                |
| 8126135 | GLO1           | -1.06 | down | glyoxalase I                                              |
| 7998722 | SNORD60        | -1.06 | down | small nucleolar RNA, C/D box 60                           |
| 8033362 | INSR           | -1.06 | down | insulin receptor                                          |
| 7927710 | CDC2           | -1.07 | down | cell division cycle 2, G1 to S and G2 to M                |
| 8171041 | VAMP7          | -1.07 | down | vesicle-associated membrane protein 7                     |
| 8176962 | VAMP7          | -1.07 | down | vesicle-associated membrane protein 7                     |
| 8068612 | WRB            | -1.07 | down | tryptophan rich basic protein                             |
| 8107850 | CHSY3          | -1.07 | down | chondroitin sulfate synthase 3                            |
| 8090823 | SLCO2A1        | -1.07 | down | solute carrier organic anion transporter family, member   |
| 8159006 | RPL7A SNORD36B | -1.08 | down | ribosomal protein L7a   small nucleolar RNA, C/D box 36   |
| 7953594 | EMG1           | -1.08 | down |                                                           |
| 8113800 | FBN2           | -1.08 | down | fibrillin 2 (congenital contractural arachnodactyly)      |
| 8017235 | APPBP2         | -1.08 | down | amyloid beta precursor protein (cytoplasmic tail) binding |

Supplemental Table 2a  
ePPCOS vs. eEPCtrl

|         |                    |       |      |                                                         |
|---------|--------------------|-------|------|---------------------------------------------------------|
| 8118571 | PSMB9              | -1.09 | down | proteasome (prosome, macropain) subunit, beta type, 9   |
| 8179495 | PSMB9              | -1.10 | down | proteasome (prosome, macropain) subunit, beta type, 9   |
| 7953218 | RAD51AP1           | -1.10 | down | RAD51 associated protein 1                              |
| 8178211 | PSMB9              | -1.10 | down | proteasome (prosome, macropain) subunit, beta type, 9   |
| 8178802 | 0133583 LOC1001336 | -1.10 | down |                                                         |
| 8001496 | NUDT21             | -1.11 | down | nudix (nucleoside diphosphate linked moiety X)-type mo  |
| 8054479 | MALL               | -1.12 | down | mal, T-cell differentiation protein-like                |
| 8096771 | DC2                | -1.12 | down |                                                         |
| 8097628 | HHIP               | -1.12 | down | hedgehog interacting protein                            |
| 7970467 | N6AMT2             | -1.12 | down | N-6 adenine-specific DNA methyltransferase 2 (putative) |
| 8147447 | PTDSS1             | -1.12 | down | phosphatidylserine synthase 1                           |
| 8030978 | LOC91664           | -1.12 | down | hypothetical protein BC007307                           |
| 8167163 | CXorf24            | -1.13 | down | chromosome X open reading frame 24                      |
| 8020898 | ZNF271             | -1.13 | down | zinc finger protein 271                                 |
| 8160531 | C9orf72            | -1.13 | down | chromosome 9 open reading frame 72                      |
| 8042495 | RY1                | -1.13 | down | putative nucleic acid binding protein RY-1              |
| 8179399 | C4A C4B            | -1.14 | down | complement component 4A (Rodgers blood group)   cor     |
| 8114010 | IRF1               | -1.14 | down | interferon regulatory factor 1                          |
| 8096415 | MMRN1              | -1.14 | down | multimerin 1                                            |
| 8118455 | C4A C4B            | -1.14 | down | complement component 4A (Rodgers blood group)   cor     |
| 8118409 | C4A C4B            | -1.14 | down | complement component 4A (Rodgers blood group)   cor     |
| 7985053 | FBXO22             | -1.14 | down | F-box protein 22                                        |
| 8141107 | SLC25A13           | -1.14 | down | solute carrier family 25, member 13 (citrin)            |
| 8102643 | CCNA2              | -1.15 | down | cyclin A2                                               |
| 7939314 | EHF                | -1.16 | down | ets homologous factor                                   |
| 8169541 | DOCK11             | -1.16 | down | dedicator of cytokinesis 11                             |
| 8130129 | NUP43              | -1.17 | down | nucleoporin 43kDa                                       |
| 8120838 | TTK                | -1.17 | down |                                                         |
| 7931187 | BUB3               | -1.17 | down |                                                         |
| 8116859 | TMEM14C            | -1.19 | down | transmembrane protein 14C                               |
| 8014956 | NR1D1 THRA         | -1.19 | down | nuclear receptor subfamily 1, group D, member 1   thyr  |
| 8088979 | VGLL3              | -1.19 | down | vestigial like 3 (Drosophila)                           |
| 8138834 | FKBP14             | -1.19 | down | FK506 binding protein 14, 22 kDa                        |



Supplemental Table 2a  
eEPPCOS vs. eEPCtrl

|         |                   |       |      |                                                             |
|---------|-------------------|-------|------|-------------------------------------------------------------|
| 7958253 | OCC-1             | -1.20 | down | overexpressed in colon carcinoma-1                          |
| 7966135 | CORO1C            | -1.20 | down | coronin, actin binding protein, 1C                          |
| 7962058 | TMTC1             | -1.21 | down | transmembrane and tetratricopeptide repeat containing       |
| 8105348 | LOC493869         | -1.21 | down | similar to RIKEN cDNA 2310016C16                            |
| 8041383 | LTBP1             | -1.22 | down | latent transforming growth factor beta binding protein 1    |
| 8108688 | PCDHB3            | -1.23 | down | protocadherin beta 3                                        |
| 8035304 | BST2              | -1.24 | down | bone marrow stromal cell antigen 2                          |
| 7916898 | DEPDC1            | -1.25 | down | DEP domain containing 1                                     |
| 7979307 | DLG7              | -1.25 | down | discs, large homolog 7 (Drosophila)                         |
| 8166140 | MOSPD2            | -1.26 | down | motile sperm domain containing 2                            |
| 7951593 | FLJ45803          | -1.26 | down |                                                             |
| 8088339 | ARF4              | -1.26 | down | ADP-ribosylation factor 4                                   |
| 8170992 | SNORA56           | -1.26 | down | small nucleolar RNA, H/ACA box 56                           |
| 8093096 | TCTEX1D2 TM4SF19  | -1.26 | down | Tctex1 domain containing 2   transmembrane 4 L six fan      |
| 7938366 | WEE1              | -1.27 | down |                                                             |
| 8006812 | PSMB3             | -1.27 | down | proteasome (prosome, macropain) subunit, beta type, 3       |
| 7996934 | NIP7              | -1.28 | down | nuclear import 7 homolog (S. cerevisiae)                    |
| 7903119 | ABCD3             | -1.29 | down | ATP-binding cassette, sub-family D (ALD), member 3          |
| 8156538 | HIATL1            | -1.29 | down | hippocampus abundant transcript-like 1                      |
| 8102800 | SLC7A11           | -1.29 | down | solute carrier family 7, (cationic amino acid transporter,  |
| 7933872 | EGR2              | -1.30 | down | early growth response 2 (Krox-20 homolog, Drosophila)       |
| 8112967 | TMEM167           | -1.30 | down | transmembrane protein 167                                   |
| 8160016 | RANBP6            | -1.30 | down | RAN binding protein 6                                       |
| 7956031 | ORMDL2            | -1.31 | down | ORM1-like 2 (S. cerevisiae)                                 |
| 8167006 | RP2               | -1.31 | down | retinitis pigmentosa 2 (X-linked recessive)                 |
| 8108301 | KIF20A            | -1.31 | down | kinesin family member 20A                                   |
| 8112980 | EDIL3             | -1.32 | down | EGF-like repeats and discoidin I-like domains 3             |
| 7952046 | MPZL2             | -1.32 | down | myelin protein zero-like 2                                  |
| 8127201 | COL21A1           | -1.33 | down | collagen, type XXI, alpha 1                                 |
| 8010078 | SNORD1C           | -1.33 | down | small nucleolar RNA, C/D box 1C                             |
| 8113591 | PGGT1B            | -1.33 | down | protein geranylgeranyltransferase type I, beta subunit      |
| 8158167 | LCN2              | -1.33 | down | lipocalin 2                                                 |
| 8124385 | HIST1H4F HIST1H4K | -1.34 | down | histone cluster 1, H4b   histone cluster 4, H4   histone cl |

Supplemental Table 2a  
ePPCOS vs. eEPCtrl

|         |                    |       |      |                                                            |
|---------|--------------------|-------|------|------------------------------------------------------------|
| 7948995 | ATL3               | -1.35 | down | atlastin 3                                                 |
| 8069689 | ADAMTS5            | -1.35 | down | ADAM metalloproteinase with thrombospondin type 1 m        |
| 8117834 | PPP1R11            | -1.35 | down | protein phosphatase 1, regulatory (inhibitor) subunit 11   |
| 7986509 | LOC441734          | -1.35 | down | similar to hypothetical protein DKFZp434I1020              |
| 8177744 | PPP1R11            | -1.35 | down | protein phosphatase 1, regulatory (inhibitor) subunit 11   |
| 8095680 | IL8                | -1.36 | down | interleukin 8                                              |
| 7986527 | C15orf51           | -1.36 | down | chromosome 15 open reading frame 51                        |
| 8159850 | FLJ35024           | -1.36 | down | hypothetical LOC401491                                     |
| 8125919 | FKBP5 LOC285847    | -1.36 | down | FK506 binding protein 5   hypothetical protein LOC2858.    |
| 8066275 | PRO0628            | -1.36 | down |                                                            |
| 7904506 | ^A1245 NBPF11 NBPF | -1.36 | down | neuroblastoma breakpoint family, member 15   neurobl       |
| 8134257 | GNG11              | -1.38 | down | guanine nucleotide binding protein (G protein), gamma :    |
| 7904562 | NBPF14 NBPF20 NBPF | -1.38 | down | neuroblastoma breakpoint family, member 16   neurobl       |
| 7953291 | CD9                | -1.38 | down |                                                            |
| 8116921 | EDN1               | -1.39 | down | endothelin 1                                               |
| 7904874 | 'F14 NBPF20 NBPF9  | -1.39 | down | neuroblastoma breakpoint family, member 16   neurobl       |
| 8122265 | TNFAIP3            | -1.40 | down | tumor necrosis factor, alpha-induced protein 3             |
| 8052355 | EFEMP1             | -1.40 | down | EGF-containing fibulin-like extracellular matrix protein 1 |
| 7903214 | LPPR4              | -1.41 | down | plasticity related gene 1                                  |
| 8081667 | SLC35A5            | -1.41 | down | solute carrier family 35, member A5                        |
| 7948906 | SNORD27 SNHG1      | -1.43 | down | small nucleolar RNA, C/D box 27   small nucleolar RNA h    |
| 7951038 | SNORA40 JOSD3      | -1.43 | down | small nucleolar RNA, H/ACA box 40   Josephin domain cc     |
| 7951178 | TRPC6              | -1.43 | down | transient receptor potential cation channel, subfamily C,  |
| 8098204 | CPE                | -1.44 | down | carboxypeptidase E                                         |
| 7948904 | SNORD28            | -1.44 | down | small nucleolar RNA, C/D box 28                            |
| 8052762 | GFPT1              | -1.45 | down | glutamine-fructose-6-phosphate transaminase 1              |
| 8149551 | PSD3               | -1.45 | down | pleckstrin and Sec7 domain containing 3                    |
| 8169240 | PRPS1              | -1.49 | down | phosphoribosyl pyrophosphate synthetase 1                  |
| 7981943 | SNRPN SNORD64 P/   | -1.51 | down | Prader-Willi/Angelman syndrome-5   small nuclear ribor     |
| 8029693 | FOSB               | -1.54 | down | FBJ murine osteosarcoma viral oncogene homolog B           |
| 7964466 | DCTN2              | -1.55 | down | dynactin 2 (p50)                                           |
| 7930870 | TOMM22             | -1.57 | down | translocase of outer mitochondrial membrane 22 homol       |
| 8168146 | KIF4A              | -1.58 | down | kinesin family member 4A                                   |

Supplemental Table 2a  
eEPPCOS vs. eEPCtrl

|         |                  |       |      |                                                               |
|---------|------------------|-------|------|---------------------------------------------------------------|
| 8001067 | HERC2P4          | -1.60 | down | hect domain and RLD 2 pseudogene 4                            |
| 8083968 | NLGN1            | -1.60 | down | neuroligin 1                                                  |
| 8082408 | SEC61A1          | -1.61 | down | Sec61 alpha 1 subunit ( <i>S. cerevisiae</i> )                |
| 8041561 | MORN2            | -1.64 | down | MORN repeat containing 2                                      |
| 8120860 | BCKDHB           | -1.65 | down | branched chain keto acid dehydrogenase E1, beta polypeptide   |
| 8007397 | PSME3            | -1.66 | down | proteasome (prosome, macropain) activator subunit 3 (FtsH)    |
| 7944991 | STT3A            | -1.67 | down | STT3, subunit of the oligosaccharyltransferase complex, alpha |
| 8092970 | APOD             | -1.68 | down | apolipoprotein D                                              |
| 8001099 | HERC2P4          | -1.68 | down | hect domain and RLD 2 pseudogene 4                            |
| 8010139 | SEC14L1          | -1.69 | down | SEC14-like 1 ( <i>S. cerevisiae</i> )                         |
| 7920317 | ILF2             | -1.74 | down | interleukin enhancer binding factor 2, 45kDa                  |
| 7915504 | ELOVL1           | -1.75 | down | elongation of very long chain fatty acids (FEN1/Elo2, SUV51)  |
| 8095303 | LPHN3            | -1.75 | down | latrophilin 3                                                 |
| 8030128 | PPP1R15A         | -1.79 | down | protein phosphatase 1, regulatory (inhibitor) subunit 15A     |
| 8109194 | SLC26A2          | -1.79 | down | solute carrier family 26 (sulfate transporter), member 2      |
| 7952339 | LOC85389         | -1.79 | down | RNA, small nucleolar                                          |
| 7907135 | SFT2D2           | -1.79 | down | SFT2 domain containing 2                                      |
| 8090448 | RUVBL1           | -1.81 | down | RuvB-like 1 ( <i>E. coli</i> )                                |
| 7941936 | GSTP1            | -1.82 | down | glutathione S-transferase pi                                  |
| 8140840 | STEAP4           | -1.85 | down | STEAP family member 4                                         |
| 7951662 | CRYAB            | -1.89 | down | crystallin, alpha B                                           |
| 7952069 | C11orf60         | -1.91 | down | chromosome 11 open reading frame 60                           |
| 7954310 | LOC100008588     | -1.98 | down | 18S ribosomal RNA                                             |
| 7904726 | TXNIP            | -2.00 | down | thioredoxin interacting protein                               |
| 7922382 | ANKRD45          | -2.00 | down | ankyrin repeat domain 45                                      |
| 8175835 | BCAP31           | -2.00 | down | B-cell receptor-associated protein 31                         |
| 7976073 | FLRT2            | -2.01 | down | fibronectin leucine rich transmembrane protein 2              |
| 8093278 | HGD LOC100132552 | -2.01 | down | homogentisate 1,2-dioxygenase (homogentisate oxidase)         |
| 8089851 | HGD LOC100132552 | -2.01 | down | homogentisate 1,2-dioxygenase (homogentisate oxidase)         |
| 7907232 | C1orf129         | -2.01 | down | chromosome 1 open reading frame 129                           |
| 8107591 | ZNF474           | -2.01 | down | zinc finger protein 474                                       |
| 8178598 | CLIC1            | -2.02 | down | chloride intracellular channel 1                              |
| 8011990 | TEKT1            | -2.02 | down | tektin 1                                                      |

Supplemental Table 2a  
eEPPCOS vs. eEPCtrl

|         |                   |       |      |                                                                      |
|---------|-------------------|-------|------|----------------------------------------------------------------------|
| 7897966 | C1orf158          | -2.03 | down | chromosome 1 open reading frame 158                                  |
| 7904695 | SEC22B            | -2.03 | down | SEC22 vesicle trafficking protein homolog B ( <i>S. cerevisiae</i> ) |
| 7920291 | S100A16           | -2.03 | down | S100 calcium binding protein A16                                     |
| 7930593 | C10orf81          | -2.03 | down | chromosome 10 open reading frame 81                                  |
| 7932744 | ARMC4             | -2.04 | down | armadillo repeat containing 4                                        |
| 8075423 | DUSP18            | -2.04 | down | dual specificity phosphatase 18                                      |
| 8085867 | NEK10             | -2.04 | down | NIMA (never in mitosis gene a)- related kinase 10                    |
| 8121015 | C6orf165 SLC35A1  | -2.05 | down | chromosome 6 open reading frame 165   solute carrier f               |
| 8111864 | C6                | -2.06 | down | complement component 6                                               |
| 8004889 | WDR16             | -2.07 | down | WD repeat domain 16                                                  |
| 8071737 | MIF               | -2.07 | down | macrophage migration inhibitory factor (glycosylation-in             |
| 8117377 | HIST1H1E          | -2.07 | down | histone cluster 1, H1e                                               |
| 8058462 | MDH1B             | -2.07 | down | malate dehydrogenase 1B, NAD (soluble)                               |
| 8131719 | DNAH11            | -2.07 | down | dynein, axonemal, heavy chain 11                                     |
| 7912537 | DHRS3             | -2.07 | down | dehydrogenase/reductase (SDR family) member 3                        |
| 7908793 | ELF3              | -2.09 | down | E74-like factor 3 (ets domain transcription factor, epithe           |
| 8172204 | MAOB              | -2.10 | down | monoamine oxidase B                                                  |
| 7925320 | NID1              | -2.10 | down | nidogen 1                                                            |
| 8122071 | ENPP3             | -2.11 | down | ectonucleotide pyrophosphatase/phosphodiesterase 3                   |
| 7939642 | CREB3L1           | -2.11 | down | cAMP responsive element binding protein 3-like 1                     |
| 8007561 | G6PC3             | -2.12 | down | glucose 6 phosphatase, catalytic, 3                                  |
| 7899480 | SNORA73A          | -2.12 | down | small nucleolar RNA, H/ACA box 73A                                   |
| 8138392 | AGR3              | -2.12 | down | anterior gradient homolog 3 ( <i>Xenopus laevis</i> )                |
| 8015349 | KRT19             | -2.12 | down | keratin 19                                                           |
| 7976488 | SERPINA5          | -2.13 | down | serpin peptidase inhibitor, clade A (alpha-1 antiproteina            |
| 8148070 | COL14A1           | -2.13 | down | collagen, type XIV, alpha 1                                          |
| 7959330 | WDR66             | -2.14 | down | WD repeat domain 66                                                  |
| 8117402 | HIST1H4F HIST1H4K | -2.14 | down | histone cluster 1, H4e   histone cluster 4, H4   histone cl          |
| 7981427 | CKB               | -2.15 | down | creatine kinase, brain                                               |
| 7995681 | MMP2              | -2.17 | down | matrix metalloproteinase 2 (gelatinase A, 72kDa gelatinas            |
| 7971077 | POSTN             | -2.17 | down | periostin, osteoblast specific factor                                |
| 8117955 | MRPS18B           | -2.18 | down | mitochondrial ribosomal protein S18B                                 |
| 8179139 | MRPS18B           | -2.18 | down | mitochondrial ribosomal protein S18B                                 |

Supplemental Table 2a  
ePPCOS vs. eEPCtrl

|         |                    |       |      |                                                                                               |
|---------|--------------------|-------|------|-----------------------------------------------------------------------------------------------|
| 8117372 | HIST1H2AC          | -2.18 | down | histone cluster 1, H2ac                                                                       |
| 8010243 | SYNGR2             | -2.18 | down | synaptogyrin 2                                                                                |
| 8059576 | PID1               | -2.18 | down | phosphotyrosine interaction domain containing 1                                               |
| 8177824 | MRPS18B            | -2.18 | down | mitochondrial ribosomal protein S18B                                                          |
| 8082478 | COPG               | -2.19 | down | coatamer protein complex, subunit gamma                                                       |
| 7991386 | CIB1               | -2.19 | down | calcium and integrin binding 1 (calmyrin)                                                     |
| 8057463 | CERKL              | -2.19 | down | ceramide kinase-like                                                                          |
| 7974902 | RHOJ               | -2.20 | down | ras homolog gene family, member J                                                             |
| 8111019 | DNAH5              | -2.21 | down | dynein, axonemal, heavy chain 5                                                               |
| 7942791 | .OC100008589 WDR81 | -2.21 | down | 28S ribosomal RNA   WD repeat domain 88                                                       |
| 7976443 | IFI27              | -2.22 | down | interferon, alpha-inducible protein 27                                                        |
| 7921862 | C1orf192           | -2.22 | down | chromosome 1 open reading frame 192                                                           |
| 7937802 | CD81               | -2.23 | down |                                                                                               |
| 7942941 | CCDC81             | -2.24 | down | coiled-coil domain containing 81                                                              |
| 7996198 | CCDC113            | -2.25 | down | coiled-coil domain containing 113                                                             |
| 8070603 | RSPH1              | -2.26 | down | radial spoke head 1 homolog (Chlamydomonas)                                                   |
| 7949588 | CD248              | -2.27 | down |                                                                                               |
| 7976496 | SERPINA3           | -2.27 | down | serpin peptidase inhibitor, clade A (alpha-1 antitrypsin)                                     |
| 8175288 | MOSPD1             | -2.27 | down | motile sperm domain containing 1                                                              |
| 8019183 | ACTG1              | -2.28 | down | actin, gamma 1                                                                                |
| 8096301 | SPP1               | -2.28 | down | secreted phosphoprotein 1 (osteopontin, bone sialoprotein)                                    |
| 8003667 | SERPINF1           | -2.29 | down | serpin peptidase inhibitor, clade F (alpha-2 antiplasmin, alpha-2 macroglobulin)              |
| 7912198 | ENO1               | -2.29 | down | enolase 1, (alpha)                                                                            |
| 8129573 | MOXD1              | -2.30 | down | monooxygenase, DBH-like 1                                                                     |
| 7959681 | DNAH10             | -2.31 | down | dynein, axonemal, heavy chain 10                                                              |
| 8137979 | ACTB               | -2.32 | down | actin, beta                                                                                   |
| 8151999 | RGS22              | -2.32 | down | regulator of G-protein signaling 22                                                           |
| 8091922 | WDR49              | -2.34 | down | WD repeat domain 49                                                                           |
| 7981988 | SNORD116-20 SNOR   | -2.34 | down | small nuclear ribonucleoprotein polypeptide N   small nuclear ribonucleoprotein polypeptide N |
| 8078014 | SLC6A6             | -2.35 | down | solute carrier family 6 (neurotransmitter transporter, tau)                                   |
| 8142646 | IQUB               | -2.35 | down | IQ motif and ubiquitin domain containing                                                      |
| 8162373 | OGN                | -2.36 | down | osteoglycin                                                                                   |
| 7981986 | 116-16 SNORD116-18 | -2.37 | down | small nuclear ribonucleoprotein polypeptide N   small nuclear ribonucleoprotein polypeptide N |

Supplemental Table 2a  
eEPPCOS vs. eEPCtrl

|         |                    |       |      |                                                           |
|---------|--------------------|-------|------|-----------------------------------------------------------|
| 7981982 | 116-16 SNORD116-18 | -2.37 | down | small nuclear ribonucleoprotein polypeptide N   small nu  |
| 7910229 | ARF1               | -2.38 | down | ADP-ribosylation factor 1                                 |
| 7967620 | DHX37 LOC100132564 | -2.39 | down | DEAH (Asp-Glu-Ala-His) box polypeptide 37   hypothetic    |
| 8055151 | 26C1B A26C1A FKSG3 | -2.39 | down | ANKRD26-like family C, member 1B   ANKRD26-like fami      |
| 8012896 | PMP22              | -2.39 | down | peripheral myelin protein 22                              |
| 7922418 | SNORD74            | -2.41 | down | small nucleolar RNA, C/D box 74                           |
| 8099524 | LDB2               | -2.41 | down | LIM domain binding 2                                      |
| 8072876 | LGALS1             | -2.42 | down | lectin, galactoside-binding, soluble, 1 (galectin 1)      |
| 8088315 | ASB14 DNAH12       | -2.43 | down | ankyrin repeat and SOCS box-containing 14   dynein, axc   |
| 8004957 | DNAH9              | -2.43 | down | dynein, axonemal, heavy chain 9                           |
| 7912347 | CASZ1              | -2.44 | down | castor zinc finger 1                                      |
| 7947156 | MUC15              | -2.44 | down | mucin 15, cell surface associated                         |
| 7957673 | C12orf55 FLJ34470  | -2.44 | down | chromosome 12 open reading frame 55   hypothetical p      |
| 8055220 | A26C1A A26C1B      | -2.44 | down | ANKRD26-like family C, member 1A   ANKRD26-like fami      |
| 7953603 | C1S                | -2.44 | down | complement component 1, s subcomponent                    |
| 8169350 | LOC100134364       | -2.46 | down |                                                           |
| 8088299 | DNHD2              | -2.47 | down | dynein heavy chain domain 2                               |
| 8088322 | DNAH12L            | -2.48 | down | dynein, axonemal, heavy chain 12-like                     |
| 8108217 | TGFBI              | -2.48 | down | transforming growth factor, beta-induced, 68kDa           |
| 7950307 | UCP2               | -2.50 | down | uncoupling protein 2 (mitochondrial, proton carrier)      |
| 7981976 | SNRPN SNORD116-14  | -2.52 | down | small nuclear ribonucleoprotein polypeptide N   small nu  |
| 8134263 | COL1A2             | -2.53 | down | collagen, type I, alpha 2                                 |
| 7943740 | FLJ46266           | -2.55 | down |                                                           |
| 8085062 | IL5RA              | -2.56 | down | interleukin 5 receptor, alpha                             |
| 8082012 | SLC15A2            | -2.57 | down | solute carrier family 15 (H+/peptide transporter), memb   |
| 8121622 | RSHL3              | -2.58 | down | radial spokehead-like 3                                   |
| 8090180 | MUC13              | -2.58 | down | mucin 13, cell surface associated                         |
| 8058857 | IGFBP5             | -2.59 | down | insulin-like growth factor binding protein 5              |
| 7916629 | C1orf87            | -2.59 | down | chromosome 1 open reading frame 87                        |
| 7903959 | C1orf88            | -2.60 | down | chromosome 1 open reading frame 88                        |
| 8145470 | DPYSL2             | -2.61 | down | dihydropyrimidinase-like 2                                |
| 7981068 | SERPINA1           | -2.63 | down | serpin peptidase inhibitor, clade A (alpha-1 antiproteina |
| 7900365 | MFSD2              | -2.64 | down | major facilitator superfamily domain containing 2         |

Supplemental Table 2a  
eEPPCOS vs. eEPCtrl

|         |                     |       |      |                                                              |
|---------|---------------------|-------|------|--------------------------------------------------------------|
| 8010978 | LOC100130876        | -2.66 | down |                                                              |
| 8095080 | PDGFRA              | -2.66 | down | platelet-derived growth factor receptor, alpha polypepti     |
| 7920337 | INTS3               | -2.67 | down | integrator complex subunit 3                                 |
| 8046922 | COL3A1              | -2.70 | down | collagen, type III, alpha 1 (Ehlers-Danlos syndrome type I   |
| 8166671 | CXorf22             | -2.72 | down | chromosome X open reading frame 22                           |
| 7940323 | MS4A8B              | -2.73 | down | membrane-spanning 4-domains, subfamily A, member 8           |
| 8091511 | P2RY14              | -2.74 | down | purinergic receptor P2Y, G-protein coupled, 14               |
| 7932598 | C10orf63            | -2.74 | down | chromosome 10 open reading frame 63                          |
| 7915472 | SLC2A1              | -2.75 | down | solute carrier family 2 (facilitated glucose transporter), n |
| 7953385 | GAPDH               | -2.77 | down | glyceraldehyde-3-phosphate dehydrogenase                     |
| 8152522 | ENPP2               | -2.78 | down | ectonucleotide pyrophosphatase/phosphodiesterase 2 (;        |
| 8157632 | C9orf18             | -2.79 | down | chromosome 9 open reading frame 18                           |
| 8094533 | FLJ16686            | -2.80 | down |                                                              |
| 8133360 | CLDN4               | -2.81 | down | claudin 4                                                    |
| 8166690 | CXorf59             | -2.82 | down | chromosome X open reading frame 59                           |
| 7918294 | C1orf194            | -2.86 | down | chromosome 1 open reading frame 194                          |
| 8008040 | LRRC46              | -2.87 | down | leucine rich repeat containing 46                            |
| 8150691 | EFCAB1              | -2.87 | down | EF-hand calcium binding domain 1                             |
| 8080863 | FLJ44379            | -2.89 | down | similar to S-100 protein, alpha chain                        |
| 8059905 | COL6A3              | -2.90 | down | collagen, type VI, alpha 3                                   |
| 7905079 | ST2H2AA3 HIST2H2A   | -2.92 | down | histone cluster 2, H2aa3   histone cluster 2, H2aa4          |
| 8040672 | C2orf39             | -2.93 | down | chromosome 2 open reading frame 39                           |
| 7899615 | SERINC2 KIAA0746    | -2.93 | down | serine incorporator 2   KIAA0746 protein                     |
| 8091887 | ZBBX                | -2.93 | down | zinc finger, B-box domain containing                         |
| 7919619 | !AA3 HIST2H2AA4 HIS | -2.93 | down | histone cluster 2, H2aa3   histone cluster 2, H2aa4   hist   |
| 8083494 | MME                 | -2.94 | down | membrane metallo-endopeptidase                               |
| 8154892 | DNAI1               | -2.94 | down | dynein, axonemal, intermediate chain 1                       |
| 7900635 | hCG_23177           | -2.96 | down | hCG23177                                                     |
| 8123744 | F13A1               | -2.96 | down | coagulation factor XIII, A1 polypeptide                      |
| 7960947 | A2M                 | -2.99 | down | alpha-2-macroglobulin                                        |
| 7988467 | FBN1                | -3.14 | down | fibrillin 1                                                  |
| 8177858 | TUBB                | -3.17 | down | tubulin, beta                                                |
| 8117995 | TUBB                | -3.17 | down | tubulin, beta                                                |

Supplemental Table 2a  
eEPPCOS vs. eEPCtrl

|         |               |       |      |                                                              |
|---------|---------------|-------|------|--------------------------------------------------------------|
| 8179174 | TUBB          | -3.18 | down | tubulin, beta                                                |
| 7965873 | IGF1          | -3.24 | down | insulin-like growth factor 1 (somatomedin C)                 |
| 8028652 | ZFP36         | -3.34 | down | zinc finger protein 36, C3H type, homolog (mouse)            |
| 7969288 | OLFM4         | -3.46 | down | olfactomedin 4                                               |
| 7980485 | DIO2          | -3.53 | down | deiodinase, iodothyronine, type II                           |
| 8155747 | C9orf135      | -3.57 | down | chromosome 9 open reading frame 135                          |
| 7931108 | DMBT1         | -3.62 | down | deleted in malignant brain tumors 1                          |
| 8135341 | FLJ23834      | -3.74 | down |                                                              |
| 8063601 | C20orf85      | -3.76 | down | chromosome 20 open reading frame 85                          |
| 7985398 | FAM154B       | -3.79 | down | family with sequence similarity 154, member B                |
| 8102792 | PCDH18        | -3.82 | down | protocadherin 18                                             |
| 8001800 | CDH11         | -3.83 | down | cadherin 11, type 2, OB-cadherin (osteoblast)                |
| 7947512 | DKFZP586H2123 | -3.84 | down | regeneration associated muscle protease                      |
| 8054511 | LOC205251     | -3.87 | down |                                                              |
| 7965403 | LUM           | -4.03 | down | lumican                                                      |
| 8097692 | EDNRA         | -4.37 | down | endothelin receptor type A                                   |
| 7968866 | C13orf30      | -4.97 | down | chromosome 13 open reading frame 30                          |
| 7960865 | SLC2A3        | -5.09 | down | solute carrier family 2 (facilitated glucose transporter), n |
| 8101659 | SPARCL1       | -5.10 | down | SPARC-like 1 (mast9, hevin)                                  |
| 7965410 | DCN           | -5.57 | down | decorin                                                      |
| 8161755 | ALDH1A1       | -5.70 | down | aldehyde dehydrogenase 1 family, member A1                   |
| 8058765 | FN1           | -6.39 | down | fibronectin 1                                                |
| 8115327 | SPARC         | -6.73 | down | secreted protein, acidic, cysteine-rich (osteonectin)        |
| 7961514 | MGP           | -8.41 | down | matrix Gla protein                                           |
| 8139087 | SFRP4         | -9.53 | down | secreted frizzled-related protein 4                          |



Supplemental Table 2b  
eENPCOS vs. eENCtrl

| Transcripts Cluster Id | Genesymbol         | eENPCOS vs. eENCtrl | Regulation | Genedescription                                          |
|------------------------|--------------------|---------------------|------------|----------------------------------------------------------|
| 8130578                | SNORA20            | 4.76                | up         | small nucleolar RNA, H/ACA box 20                        |
| 8005955                | SNORD42A           | 4.02                | up         | small nucleolar RNA, C/D box 42A                         |
| 8148040                | MAL2               | 3.14                | up         | mal, T-cell differentiation protein 2                    |
| 8160912                | C9orf131           | 3.07                | up         | chromosome 9 open reading frame 131                      |
| 8017597                | hCG_1793136        | 3.05                | up         | similar to ribosomal protein L31                         |
| 8041561                | MORN2              | 2.48                | up         | MORN repeat containing 2                                 |
| 7960896                | .OC650293 OR7E125I | 2.40                | up         | seven transmembrane helix receptor   olfactory recepto   |
| 8057056                | TTN                | 2.29                | up         | titin                                                    |
| 8005204                | .44A CCDC144B CCD  | 2.25                | up         | coiled-coil domain containing 144A   coiled-coil domain  |
| 7931108                | DMBT1              | 2.25                | up         | deleted in malignant brain tumors 1                      |
| 8013272                | .44A CCDC144B CCD  | 2.23                | up         | coiled-coil domain containing 144A   coiled-coil domain  |
| 8057377                | CCDC141 LOC28502E  | 2.19                | up         | coiled-coil domain containing 141   hypothetical protein |
| 8171041                | VAMP7              | 2.19                | up         | vesicle-associated membrane protein 7                    |
| 8176962                | VAMP7              | 2.19                | up         | vesicle-associated membrane protein 7                    |
| 8092970                | APOD               | 2.16                | up         | apolipoprotein D                                         |
| 7909789                | TGFB2              | 2.16                | up         | transforming growth factor, beta 2                       |
| 8077366                | LRRN1              | 2.14                | up         | leucine rich repeat neuronal 1                           |
| 8014956                | NR1D1 THRA         | 2.13                | up         | nuclear receptor subfamily 1, group D, member 1   thyr   |
| 7904478                | C51152 LOC1001290  | 2.08                | up         | melanoma antigen   hypothetical protein LOC100129030     |
| 8173179                | RP11-278E11.2      | 2.05                | up         | ubiquinol-cytochrome c reductase binding protein pseu    |
| 8161375                | C100129030 LOC511  | 2.01                | up         | hypothetical protein LOC100129030   melanoma antigen     |
| 8155453                | C100129030 LOC511  | 2.00                | up         | hypothetical protein LOC100129030   melanoma antigen     |
| 7901048                | SNORD46            | 1.99                | up         | small nucleolar RNA, C/D box 46                          |
| 8100378                | LOC402176          | 1.87                | up         | similar to 60S ribosomal protein L21                     |
| 7939237                | C11orf41           | 1.73                | up         | chromosome 11 open reading frame 41                      |
| 8120679                | DDX43              | 1.59                | up         | DEAD (Asp-Glu-Ala-Asp) box polypeptide 43                |
| 7922382                | ANKRD45            | 1.49                | up         | ankyrin repeat domain 45                                 |
| 8008588                | HLF                | 1.48                | up         | hepatic leukemia factor                                  |
| 8174189                | TMSL8 MGC39900     | 1.47                | up         | thymosin-like 8   thymosin beta15b                       |
| 7905548                | SPRR3              | 1.42                | up         | small proline-rich protein 3                             |
| 8158167                | LCN2               | 1.40                | up         | lipocalin 2                                              |
| 8017057                | C17orf47           | 1.40                | up         | chromosome 17 open reading frame 47                      |

Supplemental Table 2b  
eENPCOS vs. eENCtrl

|         |                    |      |    |                                                           |
|---------|--------------------|------|----|-----------------------------------------------------------|
| 8124562 | ZNF323             | 1.40 | up | zinc finger protein 323                                   |
| 8155591 | 20B RP11-195B21.3  | 1.38 | up | ankyrin repeat domain 20B   hypothetical LOC644249        |
| 8134339 | PEG10              | 1.37 | up | paternally expressed 10                                   |
| 8000636 | 00132247 DKFZp547I | 1.37 | up | similar to nuclear pore complex interacting protein   KIA |
| 8092169 | TNFSF10            | 1.36 | up | tumor necrosis factor (ligand) superfamily, member 10     |
| 8053741 | ANKRD20A3 ANKRD2   | 1.33 | up | ankyrin repeat domain 20B   ankyrin repeat domain 20 f    |
| 7904726 | TXNIP              | 1.32 | up | thioredoxin interacting protein                           |
| 8058462 | MDH1B              | 1.30 | up | malate dehydrogenase 1B, NAD (soluble)                    |
| 8037053 | CEACAM7            | 1.29 | up | carcinoembryonic antigen-related cell adhesion molecule   |
| 8157450 | ORM2               | 1.29 | up | orosomuroid 2                                             |
| 8055702 | NMI                | 1.28 | up | N-myc (and STAT) interactor                               |
| 8097628 | HHIP               | 1.28 | up | hedgehog interacting protein                              |
| 8015323 | KRT13 GUCA1B       | 1.27 | up | keratin 13   guanylate cyclase activator 1B (retina)      |
| 8006433 | CCL2               | 1.27 | up | chemokine (C-C motif) ligand 2                            |
| 7903214 | LPPR4              | 1.27 | up | plasticity related gene 1                                 |
| 8019802 | RNU2 RNU2B WDR74   | 1.26 | up | RNA, U2 small nuclear   RNA, U2B small nuclear   WD re    |
| 8019707 | RNU2 RNU2B WDR74   | 1.25 | up | RNA, U2 small nuclear   RNA, U2B small nuclear   WD re    |
| 8019641 | RNU2 RNU2B WDR74   | 1.25 | up | RNA, U2 small nuclear   RNA, U2B small nuclear   WD re    |
| 8019705 | RNU2 RNU2B WDR74   | 1.25 | up | RNA, U2 small nuclear   RNA, U2B small nuclear   WD re    |
| 8019703 | RNU2 RNU2B WDR74   | 1.25 | up | RNA, U2 small nuclear   RNA, U2B small nuclear   WD re    |
| 8019639 | RNU2 RNU2B WDR74   | 1.25 | up | RNA, U2 small nuclear   RNA, U2B small nuclear   WD re    |
| 8019637 | RNU2 RNU2B WDR74   | 1.25 | up | RNA, U2 small nuclear   RNA, U2B small nuclear   WD re    |
| 8019631 | RNU2 RNU2B WDR74   | 1.25 | up | RNA, U2 small nuclear   RNA, U2B small nuclear   WD re    |
| 8019633 | RNU2 RNU2B WDR74   | 1.25 | up | RNA, U2 small nuclear   RNA, U2B small nuclear   WD re    |
| 8019635 | RNU2 RNU2B WDR74   | 1.25 | up | RNA, U2 small nuclear   RNA, U2B small nuclear   WD re    |
| 8095680 | IL8                | 1.25 | up | interleukin 8                                             |
| 8019709 | RNU2 RNU2B WDR74   | 1.25 | up | RNA, U2 small nuclear   RNA, U2B small nuclear   WD re    |
| 8172022 | TMEM47             | 1.24 | up | transmembrane protein 47                                  |
| 8108217 | TGFB1              | 1.24 | up | transforming growth factor, beta-induced, 68kDa           |
| 8091243 | PCOLCE2            | 1.23 | up | procollagen C-endopeptidase enhancer 2                    |
| 7918294 | C1orf194           | 1.23 | up | chromosome 1 open reading frame 194                       |
| 8166690 | CXorf59            | 1.23 | up | chromosome X open reading frame 59                        |
| 7932744 | ARMC4              | 1.23 | up | armadillo repeat containing 4                             |

Supplemental Table 2b  
eENPCOS vs. eENCtrl

|         |                    |      |    |                                                            |
|---------|--------------------|------|----|------------------------------------------------------------|
| 8157446 | ORM1               | 1.22 | up | orosomuroid 1                                              |
| 8108251 | NPY6R              | 1.22 | up | neuropeptide Y receptor Y6 (pseudogene)                    |
| 7972826 | C13orf29           | 1.21 | up | chromosome 13 open reading frame 29                        |
| 8118069 | C6orf205           | 1.21 | up | chromosome 6 open reading frame 205                        |
| 8159850 | FLJ35024           | 1.20 | up | hypothetical LOC401491                                     |
| 7900365 | MFSD2              | 1.19 | up | major facilitator superfamily domain containing 2          |
| 8011990 | TEKT1              | 1.19 | up | tektin 1                                                   |
| 8154892 | DNAI1              | 1.19 | up | dynein, axonemal, intermediate chain 1                     |
| 8105596 | RGS7BP             | 1.18 | up | regulator of G-protein signaling 7 binding protein         |
| 8152522 | ENPP2              | 1.18 | up | ectonucleotide pyrophosphatase/phosphodiesterase 2 (;      |
| 8042144 | REL                | 1.18 | up | v-rel reticuloendotheliosis viral oncogene homolog (avian) |
| 8054200 | LYG2               | 1.18 | up | lysozyme G-like 2                                          |
| 7968866 | C13orf30           | 1.18 | up | chromosome 13 open reading frame 30                        |
| 7986527 | C15orf51           | 1.17 | up | chromosome 15 open reading frame 51                        |
| 7986509 | LOC441734          | 1.17 | up | similar to hypothetical protein DKFZp434I1020              |
| 8056611 | LRP2               | 1.17 | up | low density lipoprotein-related protein 2                  |
| 7983478 | C15orf48           | 1.17 | up | chromosome 15 open reading frame 48                        |
| 7930593 | C10orf81           | 1.17 | up | chromosome 10 open reading frame 81                        |
| 7942941 | CCDC81             | 1.17 | up | coiled-coil domain containing 81                           |
| 7947156 | MUC15              | 1.17 | up | mucin 15, cell surface associated                          |
| 8021301 | RAB27B             | 1.17 | up |                                                            |
| 8043504 | MAL                | 1.16 | up | mal, T-cell differentiation protein                        |
| 7945991 | OR51E2             | 1.16 | up | olfactory receptor, family 51, subfamily E, member 2       |
| 7932598 | C10orf63           | 1.16 | up | chromosome 10 open reading frame 63                        |
| 8124650 | UBD GABBR1         | 1.16 | up | ubiquitin D   gamma-aminobutyric acid (GABA) B receptor    |
| 8177931 | C6orf205           | 1.16 | up | chromosome 6 open reading frame 205                        |
| 8179224 | C6orf205           | 1.16 | up | chromosome 6 open reading frame 205                        |
| 8083743 | ARL14              | 1.15 | up | ADP-ribosylation factor-like 14                            |
| 8091799 | 3orf57 LOC10012928 | 1.15 | up | chromosome 3 open reading frame 57   hypothetical protein  |
| 8170635 | ZNF275             | 1.15 | up | zinc finger protein 275                                    |
| 7983630 | FGF7               | 1.14 | up | fibroblast growth factor 7 (keratinocyte growth factor)    |
| 8094533 | FLJ16686           | 1.14 | up |                                                            |
| 8042788 | ACTG2              | 1.14 | up | actin, gamma 2, smooth muscle, enteric                     |

Supplemental Table 2b  
eENPCOS vs. eENCtrl

|         |                  |      |    |                                                            |
|---------|------------------|------|----|------------------------------------------------------------|
| 8114010 | IRF1             | 1.14 | up | interferon regulatory factor 1                             |
| 8122071 | ENPP3            | 1.14 | up | ectonucleotide pyrophosphatase/phosphodiesterase 3         |
| 7907232 | C1orf129         | 1.13 | up | chromosome 1 open reading frame 129                        |
| 8004957 | DNAH9            | 1.13 | up | dynein, axonemal, heavy chain 9                            |
| 7897966 | C1orf158         | 1.13 | up | chromosome 1 open reading frame 158                        |
| 8118455 | C4A C4B          | 1.13 | up | complement component 4A (Rodgers blood group)   cor        |
| 8118409 | C4A C4B          | 1.13 | up | complement component 4A (Rodgers blood group)   cor        |
| 8140686 | SEMA3D           | 1.13 | up | sema domain, immunoglobulin domain (Ig), short basic c     |
| 8179399 | C4A C4B          | 1.13 | up | complement component 4A (Rodgers blood group)   cor        |
| 8111864 | C6               | 1.13 | up | complement component 6                                     |
| 8070603 | RSPH1            | 1.13 | up | radial spoke head 1 homolog (Chlamydomonas)                |
| 8066528 | PIGT             | 1.12 | up | phosphatidylinositol glycan anchor biosynthesis, class T   |
| 7981427 | CKB              | 1.12 | up | creatine kinase, brain                                     |
| 8004889 | WDR16            | 1.12 | up | WD repeat domain 16                                        |
| 7943530 | GRIA4            | 1.12 | up | glutamate receptor, ionotropic, AMPA 4                     |
| 8003667 | SERPINF1         | 1.11 | up | serpin peptidase inhibitor, clade F (alpha-2 antiplasmin,  |
| 8178295 | UBD GABBR1       | 1.11 | up | ubiquitin D   gamma-aminobutyric acid (GABA) B recept      |
| 8146957 | PI15             | 1.11 | up | peptidase inhibitor 15                                     |
| 8121015 | C6orf165 SLC35A1 | 1.11 | up | chromosome 6 open reading frame 165   solute carrier f     |
| 8015349 | KRT19            | 1.10 | up | keratin 19                                                 |
| 7908793 | ELF3             | 1.10 | up | E74-like factor 3 (ets domain transcription factor, epithe |
| 8138289 | ETV1             | 1.10 | up | ets variant gene 1                                         |
| 7948904 | SNORD28          | 1.10 | up | small nucleolar RNA, C/D box 28                            |
| 8131719 | DNAH11           | 1.10 | up | dynein, axonemal, heavy chain 11                           |
| 8045688 | TNFAIP6          | 1.09 | up | tumor necrosis factor, alpha-induced protein 6             |
| 8107850 | CHSY3            | 1.08 | up | chondroitin sulfate synthase 3                             |
| 8152617 | HAS2             | 1.08 | up | hyaluronan synthase 2                                      |
| 8057463 | CERKL            | 1.08 | up | ceramide kinase-like                                       |
| 8121622 | RSHL3            | 1.08 | up | radial spokehead-like 3                                    |
| 8166671 | CXorf22          | 1.08 | up | chromosome X open reading frame 22                         |
| 7950810 | SYTL2            | 1.08 | up | synaptotagmin-like 2                                       |
| 8028652 | ZFP36            | 1.08 | up | zinc finger protein 36, C3H type, homolog (mouse)          |
| 8077270 | CHL1             | 1.08 | up | cell adhesion molecule with homology to L1CAM (close t     |

Supplemental Table 2b  
eENPCOS vs. eENCtrl

|         |                   |      |    |                                                               |
|---------|-------------------|------|----|---------------------------------------------------------------|
| 8116983 | CD83              | 1.08 | up |                                                               |
| 7976812 | SNORD113-4        | 1.07 | up | small nucleolar RNA, C/D box 113-4                            |
| 8077323 | CNTN4             | 1.07 | up | contactin 4                                                   |
| 8121916 | RSPO3             | 1.07 | up | R-spondin 3 homolog ( <i>Xenopus laevis</i> )                 |
| 7933872 | EGR2              | 1.07 | up | early growth response 2 (Krox-20 homolog, <i>Drosophila</i> ) |
| 7985398 | FAM154B           | 1.06 | up | family with sequence similarity 154, member B                 |
| 8085062 | IL5RA             | 1.06 | up | interleukin 5 receptor, alpha                                 |
| 8171248 | KAL1              | 1.06 | up | Kallmann syndrome 1 sequence                                  |
| 8093278 | HGD LOC100132552  | 1.06 | up | homogentisate 1,2-dioxygenase (homogentisate oxidase)         |
| 7949588 | CD248             | 1.06 | up |                                                               |
| 7959681 | DNAH10            | 1.06 | up | dynein, axonemal, heavy chain 10                              |
| 8135218 | LRRC17            | 1.05 | up | leucine rich repeat containing 17                             |
| 8089851 | HGD LOC100132552  | 1.05 | up | homogentisate 1,2-dioxygenase (homogentisate oxidase)         |
| 7903959 | C1orf88           | 1.05 | up | chromosome 1 open reading frame 88                            |
| 7951593 | FLJ45803          | 1.05 | up |                                                               |
| 8172204 | MAOB              | 1.05 | up | monoamine oxidase B                                           |
| 7931748 | IDI2              | 1.05 | up | isopentenyl-diphosphate delta isomerase 2                     |
| 8142646 | IQUB              | 1.05 | up | IQ motif and ubiquitin domain containing                      |
| 7904874 | F14 NBPF20 NBPF9  | 1.05 | up | neuroblastoma breakpoint family, member 16   neurobl          |
| 8088315 | ASB14 DNAH12      | 1.05 | up | ankyrin repeat and SOCS box-containing 14   dynein, axo       |
| 7932407 | ST8SIA6           | 1.05 | up | ST8 alpha-N-acetyl-neuraminide alpha-2,8-sialyltransferase    |
| 8157632 | C9orf18           | 1.05 | up | chromosome 9 open reading frame 18                            |
| 7957140 | LGR5              | 1.05 | up | leucine-rich repeat-containing G protein-coupled receptor     |
| 8040672 | C2orf39           | 1.04 | up | chromosome 2 open reading frame 39                            |
| 8088299 | DNHD2             | 1.04 | up | dynein heavy chain domain 2                                   |
| 8155487 | :GF7P2 LOC1001327 | 1.04 | up | keratinocyte growth factor-like protein 1   keratinocyte g    |
| 8161455 | :GF7P2 LOC1001327 | 1.04 | up | keratinocyte growth factor-like protein 2   keratinocyte g    |
| 7970513 | C13orf3           | 1.04 | up | chromosome 13 open reading frame 3                            |
| 8123744 | F13A1             | 1.04 | up | coagulation factor XIII, A1 polypeptide                       |
| 8161423 | :GF7P2 LOC1001327 | 1.04 | up | keratinocyte growth factor-like protein 2   keratinocyte g    |
| 8080863 | FLJ44379          | 1.04 | up | similar to S-100 protein, alpha chain                         |
| 7939642 | CREB3L1           | 1.04 | up | cAMP responsive element binding protein 3-like 1              |
| 8091887 | ZBBX              | 1.04 | up | zinc finger, B-box domain containing                          |

Supplemental Table 2b  
eENPCOS vs. eENCtrl

|         |                    |      |    |                                                            |
|---------|--------------------|------|----|------------------------------------------------------------|
| 8113800 | FBN2               | 1.04 | up | fibrillin 2 (congenital contractural arachnodactyly)       |
| 7950307 | UCP2               | 1.04 | up | uncoupling protein 2 (mitochondrial, proton carrier)       |
| 8083494 | MME                | 1.03 | up | membrane metallo-endopeptidase                             |
| 8147273 | .C26A7 LOC10013074 | 1.03 | up | solute carrier family 26, member 7   similar to hCG2008!   |
| 8138392 | AGR3               | 1.03 | up | anterior gradient homolog 3 ( <i>Xenopus laevis</i> )      |
| 8129573 | MOXD1              | 1.03 | up | monooxygenase, DBH-like 1                                  |
| 8092165 | GHSR               | 1.03 | up | growth hormone secretagogue receptor                       |
| 8111019 | DNAH5              | 1.03 | up | dynein, axonemal, heavy chain 5                            |
| 8140650 | SEMA3E             | 1.03 | up | sema domain, immunoglobulin domain (Ig), short basic c     |
| 7939314 | EHF                | 1.03 | up | ets homologous factor                                      |
| 8067839 | 00132771 LOC10013  | 1.03 | up | fibroblast growth factor 7 pseudogene 2   similar to kera  |
| 8088322 | DNAH12L            | 1.03 | up | dynein, axonemal, heavy chain 12-like                      |
| 7971541 | SUCLA2             | 1.03 | up | succinate-CoA ligase, ADP-forming, beta subunit            |
| 8017061 | TEX14              | 1.02 | up | testis expressed 14                                        |
| 8063601 | C20orf85           | 1.02 | up | chromosome 20 open reading frame 85                        |
| 8140840 | STEAP4             | 1.02 | up | STEAP family member 4                                      |
| 8150691 | EFCAB1             | 1.02 | up | EF-hand calcium binding domain 1                           |
| 7916629 | C1orf87            | 1.02 | up | chromosome 1 open reading frame 87                         |
| 8147132 | CA2                | 1.02 | up | carbonic anhydrase II                                      |
| 7940323 | MS4A8B             | 1.02 | up | membrane-spanning 4-domains, subfamily A, member 8         |
| 7905079 | ST2H2AA3 HIST2H2A  | 1.02 | up | histone cluster 2, H2aa3   histone cluster 2, H2aa4        |
| 7902738 | CLCA4              | 1.02 | up | chloride channel, calcium activated, family member 4       |
| 8107591 | ZNF474             | 1.02 | up | zinc finger protein 474                                    |
| 8091922 | WDR49              | 1.01 | up | WD repeat domain 49                                        |
| 7919619 | AA3 HIST2H2AA4 HI  | 1.01 | up | histone cluster 2, H2aa3   histone cluster 2, H2aa4   hist |
| 8088979 | VGLL3              | 1.01 | up | vestigial like 3 ( <i>Drosophila</i> )                     |
| 7902808 | HS2ST1             | 1.01 | up | heparan sulfate 2-O-sulfotransferase 1                     |
| 8030128 | PPP1R15A           | 1.01 | up | protein phosphatase 1, regulatory (inhibitor) subunit 15/  |
| 7904506 | NA1245 NBPF11 NBP  | 1.01 | up | neuroblastoma breakpoint family, member 15   neurobl       |
| 7943740 | FLJ46266           | 1.01 | up |                                                            |
| 8091511 | P2RY14             | 1.00 | up | purinergic receptor P2Y, G-protein coupled, 14             |
| 7904562 | NBPF14 NBPF20 NB   | 1.00 | up | neuroblastoma breakpoint family, member 16   neurobl       |
| 8151999 | RGS22              | 1.00 | up | regulator of G-protein signaling 22                        |

Supplemental Table 2b  
eENPCOS vs. eENCtrl

|         |                  |       |      |                                                            |
|---------|------------------|-------|------|------------------------------------------------------------|
| 8090180 | MUC13            | -1.00 | down | mucin 13, cell surface associated                          |
| 8025601 | ICAM1            | -1.00 | down | intercellular adhesion molecule 1 (CD54), human rhinovi    |
| 7951662 | CRYAB            | -1.00 | down | crystallin, alpha B                                        |
| 8093096 | TCTEX1D2 TM4SF19 | -1.01 | down | Tctex1 domain containing 2   transmembrane 4 L six fan     |
| 8162373 | OGN              | -1.01 | down | osteoglycin                                                |
| 8117377 | HIST1H1E         | -1.01 | down | histone cluster 1, H1e                                     |
| 8066745 | ZNF334           | -1.01 | down | zinc finger protein 334                                    |
| 8134257 | GNG11            | -1.01 | down | guanine nucleotide binding protein (G protein), gamma 1    |
| 7954293 | PDE3A            | -1.01 | down | phosphodiesterase 3A, cGMP-inhibited                       |
| 8082012 | SLC15A2          | -1.01 | down | solute carrier family 15 (H+/peptide transporter), memb    |
| 8095080 | PDGFRA           | -1.01 | down | platelet-derived growth factor receptor, alpha polypepti   |
| 7958031 | C12orf48         | -1.02 | down | chromosome 12 open reading frame 48                        |
| 7932420 | PTPLA            | -1.02 | down | protein tyrosine phosphatase-like (proline instead of cat  |
| 8096744 | CYP2U1           | -1.02 | down | cytochrome P450, family 2, subfamily U, polypeptide 1      |
| 8008040 | LRRC46           | -1.02 | down | leucine rich repeat containing 46                          |
| 8169541 | DOCK11           | -1.02 | down | dedicator of cytokinesis 11                                |
| 7900635 | hCG_23177        | -1.02 | down | hCG23177                                                   |
| 8019831 | CLUL1            | -1.02 | down | clusterin-like 1 (retinal)                                 |
| 7951178 | TRPC6            | -1.02 | down | transient receptor potential cation channel, subfamily C,  |
| 8112274 | ELOVL7           | -1.02 | down | ELOVL family member 7, elongation of long chain fatty ac   |
| 8052355 | EFEMP1           | -1.02 | down | EGF-containing fibulin-like extracellular matrix protein 1 |
| 8029693 | FOSB             | -1.03 | down | FBJ murine osteosarcoma viral oncogene homolog B           |
| 8133360 | CLDN4            | -1.03 | down | claudin 4                                                  |
| 8122265 | TNFAIP3          | -1.04 | down | tumor necrosis factor, alpha-induced protein 3             |
| 8099524 | LDB2             | -1.04 | down | LIM domain binding 2                                       |
| 8059905 | COL6A3           | -1.04 | down | collagen, type VI, alpha 3                                 |
| 7965403 | LUM              | -1.04 | down | lumican                                                    |
| 8108256 | MYOT             | -1.04 | down | myotilin                                                   |
| 7932453 | NEBL             | -1.05 | down | nebulette                                                  |
| 8175288 | MOSPD1           | -1.05 | down | motile sperm domain containing 1                           |
| 7930714 | ATRNL1           | -1.05 | down | attractin-like 1                                           |
| 8117372 | HIST1H2AC        | -1.06 | down | histone cluster 1, H2ac                                    |
| 8134263 | COL1A2           | -1.06 | down | collagen, type I, alpha 2                                  |

Supplemental Table 2b  
eENPCOS vs. eENCtrl

|         |                  |       |      |                                                              |
|---------|------------------|-------|------|--------------------------------------------------------------|
| 7981068 | SERPINA1         | -1.06 | down | serpin peptidase inhibitor, clade A (alpha-1 antiproteina    |
| 8101659 | SPARCL1          | -1.07 | down | SPARC-like 1 (mast9, hevin)                                  |
| 8054511 | LOC205251        | -1.07 | down |                                                              |
| 7959330 | WDR66            | -1.07 | down | WD repeat domain 66                                          |
| 8154100 | VLDLR            | -1.07 | down | very low density lipoprotein receptor                        |
| 8127563 | COL12A1          | -1.07 | down | collagen, type XII, alpha 1                                  |
| 8096301 | SPP1             | -1.07 | down | secreted phosphoprotein 1 (osteopontin, bone sialoprot       |
| 8135341 | FLJ23834         | -1.07 | down |                                                              |
| 7968789 | C13orf15         | -1.07 | down | chromosome 13 open reading frame 15                          |
| 8146794 | DEPDC2           | -1.07 | down | DEP domain containing 2                                      |
| 8155747 | C9orf135         | -1.07 | down | chromosome 9 open reading frame 135                          |
| 7947512 | DKFZP586H2123    | -1.07 | down | regeneration associated muscle protease                      |
| 8095303 | LPHN3            | -1.08 | down | latrophilin 3                                                |
| 7968632 | RP11-251J8.3     | -1.08 | down | hypothetical LOC646871                                       |
| 7915472 | SLC2A1           | -1.08 | down | solute carrier family 2 (facilitated glucose transporter), n |
| 7969288 | OLFM4            | -1.09 | down | olfactomedin 4                                               |
| 7965873 | IGF1             | -1.10 | down | insulin-like growth factor 1 (somatomedin C)                 |
| 8175177 | MBNL3            | -1.10 | down | muscleblind-like 3 (Drosophila)                              |
| 8169350 | LOC100134364     | -1.10 | down |                                                              |
| 8147516 | MATN2            | -1.10 | down | matrilin 2                                                   |
| 7960947 | A2M              | -1.10 | down | alpha-2-macroglobulin                                        |
| 8010243 | SYNGR2           | -1.11 | down | synaptogyrin 2                                               |
| 8092578 | ETV5             | -1.11 | down | ets variant gene 5 (ets-related molecule)                    |
| 7953603 | C1S              | -1.11 | down | complement component 1, s subcomponent                       |
| 7912537 | DHRS3            | -1.11 | down | dehydrogenase/reductase (SDR family) member 3                |
| 7965855 | NUP37            | -1.11 | down | nucleoporin 37kDa                                            |
| 7917850 | ARHGAP29         | -1.12 | down | Rho GTPase activating protein 29                             |
| 8083839 | GPR160           | -1.12 | down | G protein-coupled receptor 160                               |
| 7899615 | SERINC2 KIAA0746 | -1.12 | down | serine incorporator 2   KIAA0746 protein                     |
| 8059376 | SERPINE2         | -1.12 | down | serpin peptidase inhibitor, clade E (nexin, plasminogen a    |
| 7929334 | CEP55            | -1.12 | down | centrosomal protein 55kDa                                    |
| 8046428 | RAPGEF4          | -1.12 | down | Rap guanine nucleotide exchange factor (GEF) 4               |
| 8071737 | MIF              | -1.13 | down | macrophage migration inhibitory factor (glycosylation-in     |



Supplemental Table 2b  
eENPCOS vs. eENCtrl

|         |                   |       |      |                                                             |
|---------|-------------------|-------|------|-------------------------------------------------------------|
| 8127201 | COL21A1           | -1.13 | down | collagen, type XXI, alpha 1                                 |
| 8083968 | NLGN1             | -1.13 | down | neuroligin 1                                                |
| 8120961 | C6orf117          | -1.13 | down | chromosome 6 open reading frame 117                         |
| 8114856 | PLAC8L1           | -1.14 | down | PLAC8-like 1                                                |
| 8059576 | PID1              | -1.14 | down | phosphotyrosine interaction domain containing 1             |
| 8100464 | NMU               | -1.15 | down | neuromedin U                                                |
| 8046922 | COL3A1            | -1.16 | down | collagen, type III, alpha 1 (Ehlers-Danlos syndrome type I  |
| 7927710 | CDC2              | -1.16 | down | cell division cycle 2, G1 to S and G2 to M                  |
| 7954310 | LOC100008588      | -1.16 | down | 18S ribosomal RNA                                           |
| 8120838 | TTK               | -1.17 | down |                                                             |
| 7942791 | OC100008589 WDR8  | -1.17 | down | 28S ribosomal RNA   WD repeat domain 88                     |
| 8148070 | COL14A1           | -1.17 | down | collagen, type XIV, alpha 1                                 |
| 7998722 | SNORD60           | -1.18 | down | small nucleolar RNA, C/D box 60                             |
| 8117402 | HIST1H4F HIST1H4K | -1.19 | down | histone cluster 1, H4e   histone cluster 4, H4   histone cl |
| 7974902 | RHOJ              | -1.19 | down | ras homolog gene family, member J                           |
| 8115327 | SPARC             | -1.19 | down | secreted protein, acidic, cysteine-rich (osteonectin)       |
| 7916898 | DEPDC1            | -1.19 | down | DEP domain containing 1                                     |
| 8112980 | EDIL3             | -1.20 | down | EGF-like repeats and discoidin I-like domains 3             |
| 7996198 | CCDC113           | -1.20 | down | coiled-coil domain containing 113                           |
| 8079237 | KIF15             | -1.20 | down | kinesin family member 15                                    |
| 7965410 | DCN               | -1.20 | down | decorin                                                     |
| 7981988 | SNORD116-20 SNOR  | -1.21 | down | small nuclear ribonucleoprotein polypeptide N   small nu    |
| 7967620 | SNORD116-20 SNOR  | -1.21 | down | small nuclear ribonucleoprotein polypeptide N   small nu    |
| 7936673 | RGS10             | -1.22 | down | regulator of G-protein signaling 10                         |
| 7948906 | SNORD27 SNHG1     | -1.22 | down | small nucleolar RNA, C/D box 27   small nucleolar RNA h     |
| 8007420 | AOC3              | -1.22 | down | amine oxidase, copper containing 3 (vascular adhesion p     |
| 7922418 | SNORD74           | -1.22 | down | small nucleolar RNA, C/D box 74                             |
| 8007561 | G6PC3             | -1.22 | down | glucose 6 phosphatase, catalytic, 3                         |
| 7976073 | FLRT2             | -1.23 | down | fibronectin leucine rich transmembrane protein 2            |
| 8138834 | FKBP14            | -1.24 | down | FK506 binding protein 14, 22 kDa                            |
| 7982358 | ARHGAP11A         | -1.24 | down | Rho GTPase activating protein 11A                           |
| 8012896 | PMP22             | -1.24 | down | peripheral myelin protein 22                                |
| 7937802 | CD81              | -1.24 | down |                                                             |

Supplemental Table 2b  
eENPCOS vs. eENCtrl

|         |                    |       |      |                                                                  |
|---------|--------------------|-------|------|------------------------------------------------------------------|
| 7916570 | OMA1 DAB1          | -1.25 | down | OMA1 homolog, zinc metallopeptidase ( <i>S. cerevisiae</i> )   c |
| 7991386 | CIB1               | -1.25 | down | calcium and integrin binding 1 (calmyrin)                        |
| 8125775 | C6orf125           | -1.25 | down | chromosome 6 open reading frame 125                              |
| 8102792 | PCDH18             | -1.25 | down | protocadherin 18                                                 |
| 7960865 | SLC2A3             | -1.25 | down | solute carrier family 2 (facilitated glucose transporter), n     |
| 7961514 | MGP                | -1.26 | down | matrix Gla protein                                               |
| 8131944 | NFE2L3             | -1.27 | down | nuclear factor (erythroid-derived 2)-like 3                      |
| 8069689 | ADAMTS5            | -1.28 | down | ADAM metallopeptidase with thrombospondin type 1 m               |
| 7944082 | TAGLN              | -1.28 | down | transgelin                                                       |
| 7958253 | OCC-1              | -1.29 | down | overexpressed in colon carcinoma-1                               |
| 8102643 | CCNA2              | -1.30 | down | cyclin A2                                                        |
| 8097857 | MND1               | -1.30 | down | meiotic nuclear divisions 1 homolog ( <i>S. cerevisiae</i> )     |
| 7922969 | PDC                | -1.30 | down | phosducin                                                        |
| 7995681 | MMP2               | -1.30 | down | matrix metallopeptidase 2 (gelatinase A, 72kDa gelatinase        |
| 7957673 | C12orf55 FLJ34470  | -1.30 | down | chromosome 12 open reading frame 55   hypothetical p             |
| 8132318 | ANLN               | -1.31 | down | anillin, actin binding protein                                   |
| 7917516 | GBP1 LOC400759     | -1.31 | down | guanylate binding protein 1, interferon-inducible, 67kDa         |
| 8085145 | RAD18              | -1.31 | down |                                                                  |
| 8149955 | PBK                | -1.32 | down | PDZ binding kinase                                               |
| 7976496 | SERPINA3           | -1.33 | down | serpin peptidase inhibitor, clade A (alpha-1 antiproteina        |
| 8179139 | MRPS18B            | -1.34 | down | mitochondrial ribosomal protein S18B                             |
| 8175835 | BCAP31             | -1.34 | down | B-cell receptor-associated protein 31                            |
| 8177824 | MRPS18B            | -1.34 | down | mitochondrial ribosomal protein S18B                             |
| 8117955 | MRPS18B            | -1.34 | down | mitochondrial ribosomal protein S18B                             |
| 8116724 | FARS2              | -1.34 | down | phenylalanyl-tRNA synthetase 2, mitochondrial                    |
| 8168146 | KIF4A              | -1.35 | down | kinesin family member 4A                                         |
| 8061579 | TPX2               | -1.36 | down |                                                                  |
| 8097692 | EDNRA              | -1.36 | down | endothelin receptor type A                                       |
| 7920291 | S100A16            | -1.36 | down | S100 calcium binding protein A16                                 |
| 7976488 | SERPINA5           | -1.36 | down | serpin peptidase inhibitor, clade A (alpha-1 antiproteina        |
| 7981982 | 116-16 SNORD116-1f | -1.37 | down | small nuclear ribonucleoprotein polypeptide N   small n          |
| 7981986 | 116-16 SNORD116-1f | -1.37 | down | small nuclear ribonucleoprotein polypeptide N   small n          |
| 7980485 | DIO2               | -1.37 | down | deiodinase, iodothyronine, type II                               |

Supplemental Table 2b  
eENPCOS vs. eENCtrl

|         |                     |       |      |                                                            |
|---------|---------------------|-------|------|------------------------------------------------------------|
| 8055220 | A26C1A A26C1B       | -1.37 | down | ANKRD26-like family C, member 1A   ANKRD26-like fami       |
| 7988467 | FBN1                | -1.37 | down | fibrillin 1                                                |
| 7906930 | NUF2                | -1.39 | down |                                                            |
| 7935180 | PDLIM1              | -1.39 | down | PDZ and LIM domain 1 (elfin)                               |
| 8001800 | CDH11               | -1.41 | down | cadherin 11, type 2, OB-cadherin (osteoblast)              |
| 7910229 | ARF1                | -1.42 | down | ADP-ribosylation factor 1                                  |
| 8109712 | HMMR                | -1.42 | down | hyaluronan-mediated motility receptor (RHAMM)              |
| 8083779 | SERPINI1            | -1.43 | down | serpin peptidase inhibitor, clade I (neuroserpin), membe   |
| 8161755 | ALDH1A1             | -1.45 | down | aldehyde dehydrogenase 1 family, member A1                 |
| 8122554 | RAB32               | -1.45 | down |                                                            |
| 7929258 | KIF11               | -1.46 | down | kinesin family member 11                                   |
| 7952339 | LOC85389            | -1.47 | down | RNA, small nucleolar                                       |
| 7965226 | RASSF9              | -1.47 | down | Ras association (RalGDS/AF-6) domain family (N-termina     |
| 7953218 | RAD51AP1            | -1.47 | down | RAD51 associated protein 1                                 |
| 8155214 | MELK                | -1.48 | down | maternal embryonic leucine zipper kinase                   |
| 8055151 | A26C1B A26C1A FKSG1 | -1.49 | down | ANKRD26-like family C, member 1B   ANKRD26-like fami       |
| 8102560 | MAD2L1              | -1.50 | down | MAD2 mitotic arrest deficient-like 1 (yeast)               |
| 7984540 | KIF23               | -1.52 | down | kinesin family member 23                                   |
| 8058765 | FN1                 | -1.52 | down | fibronectin 1                                              |
| 8085867 | NEK10               | -1.52 | down | NIMA (never in mitosis gene a)- related kinase 10          |
| 8151032 | GGH                 | -1.52 | down | gamma-glutamyl hydrolase (conjugase, folic polygamma       |
| 7899480 | SNORA73A            | -1.52 | down | small nucleolar RNA, H/ACA box 73A                         |
| 7971866 | DIAPH3              | -1.53 | down | diaphanous homolog 3 (Drosophila)                          |
| 7947248 | KIF18A              | -1.54 | down | kinesin family member 18A                                  |
| 7971077 | POSTN               | -1.55 | down | periostin, osteoblast specific factor                      |
| 8137979 | ACTB                | -1.56 | down | actin, beta                                                |
| 8058857 | IGFBP5              | -1.56 | down | insulin-like growth factor binding protein 5               |
| 7925320 | NID1                | -1.56 | down | nidogen 1                                                  |
| 7912347 | CASZ1               | -1.57 | down | castor zinc finger 1                                       |
| 7904695 | SEC22B              | -1.58 | down | SEC22 vesicle trafficking protein homolog B (S. cerevisiae |
| 7937020 | MKI67               | -1.58 | down | antigen identified by monoclonal antibody Ki-67            |
| 8054580 | BUB1                | -1.59 | down |                                                            |
| 8155849 | ANXA1               | -1.59 | down | annexin A1                                                 |

Supplemental Table 2b  
eENPCOS vs. eENCtrl

|         |                    |       |      |                                                            |
|---------|--------------------|-------|------|------------------------------------------------------------|
| 8125919 | FKBP5   LOC285847  | -1.60 | down | FK506 binding protein 5   hypothetical protein LOC2858     |
| 7970467 | N6AMT2             | -1.60 | down | N-6 adenine-specific DNA methyltransferase 2 (putative)    |
| 8149551 | PSD3               | -1.61 | down | pleckstrin and Sec7 domain containing 3                    |
| 7951408 | COP1               | -1.61 | down | caspase-1 dominant-negative inhibitor pseudo-ICE           |
| 7920337 | INTS3              | -1.66 | down | integrator complex subunit 3                               |
| 7982757 | CASC5              | -1.66 | down | cancer susceptibility candidate 5                          |
| 8135587 | CAV2               | -1.67 | down | caveolin 2                                                 |
| 8178598 | CLIC1              | -1.67 | down | chloride intracellular channel 1                           |
| 8075423 | DUSP18             | -1.67 | down | dual specificity phosphatase 18                            |
| 8019857 | NDC80              | -1.67 | down |                                                            |
| 7923086 | ASPM               | -1.69 | down | asp (abnormal spindle) homolog, microcephaly associate     |
| 7948900 | SNORD30            | -1.69 | down | small nucleolar RNA, C/D box 30                            |
| 7953385 | GAPDH              | -1.70 | down | glyceraldehyde-3-phosphate dehydrogenase                   |
| 8020898 | ZNF271             | -1.70 | down | zinc finger protein 271                                    |
| 8059708 | SNORA75            | -1.73 | down | small nucleolar RNA, H/ACA box 75                          |
| 8145470 | DPYSL2             | -1.73 | down | dihydropyrimidinase-like 2                                 |
| 8108301 | KIF20A             | -1.74 | down | kinesin family member 20A                                  |
| 8073192 | UQCRF51            | -1.76 | down | ubiquinol-cytochrome c reductase, Rieske iron-sulfur pol   |
| 7979307 | DLG7               | -1.76 | down | discs, large homolog 7 (Drosophila)                        |
| 7981951 | SNRPN   SNORD116-2 | -1.80 | down | small nuclear ribonucleoprotein polypeptide N   small nu   |
| 8014974 | TOP2A              | -1.80 | down | topoisomerase (DNA) II alpha 170kDa                        |
| 8019183 | ACTG1              | -1.81 | down | actin, gamma 1                                             |
| 8105828 | CCNB1              | -1.81 | down | cyclin B1                                                  |
| 7962058 | TMTC1              | -1.83 | down | transmembrane and tetratricopeptide repeat containing      |
| 7976443 | IFI27              | -1.84 | down | interferon, alpha-inducible protein 27                     |
| 7989647 | KIAA0101           | -1.86 | down |                                                            |
| 7921862 | C1orf192           | -1.87 | down | chromosome 1 open reading frame 192                        |
| 8019842 | TYMS               | -1.89 | down | thymidylate synthetase                                     |
| 7923426 | UBE2T              | -1.91 | down | ubiquitin-conjugating enzyme E2T (putative)                |
| 8130129 | NUP43              | -1.92 | down | nucleoporin 43kDa                                          |
| 8072876 | LGALS1             | -1.94 | down | lectin, galactoside-binding, soluble, 1 (galectin 1)       |
| 8078014 | SLC6A6             | -1.95 | down | solute carrier family 6 (neurotransmitter transporter, tau |
| 8006812 | PSMB3              | -1.96 | down | proteasome (prosome, macropain) subunit, beta type, 3      |

Supplemental Table 2b  
eENPCOS vs. eENCtrl

|         |                   |       |      |                                                                 |
|---------|-------------------|-------|------|-----------------------------------------------------------------|
| 7981976 | SNRPN SNORD116-14 | -1.97 | down | small nuclear ribonucleoprotein polypeptide N   small nu        |
| 8101322 | MOP-1             | -2.00 | down |                                                                 |
| 7929438 | HELLS             | -2.00 | down | helicase, lymphoid-specific                                     |
| 8179055 | ZNRD1             | -2.01 | down | zinc ribbon domain containing 1                                 |
| 8010139 | SEC14L1           | -2.01 | down | SEC14-like 1 ( <i>S. cerevisiae</i> )                           |
| 7974229 | KLHDC2            | -2.01 | down | kelch domain containing 2                                       |
| 7903393 | S1PR1             | -2.01 | down | sphingosine-1-phosphate receptor 1                              |
| 8166784 | TSPAN7            | -2.01 | down | tetraspanin 7                                                   |
| 8088339 | ARF4              | -2.01 | down | ADP-ribosylation factor 4                                       |
| 8078544 | MLH1              | -2.02 | down | mutL homolog 1, colon cancer, nonpolyposis type 2 ( <i>E. c</i> |
| 8034342 | ZNF625 ZNF20      | -2.02 | down | zinc finger protein 625   zinc finger protein 20                |
| 8120239 | TMEM14A           | -2.02 | down | transmembrane protein 14A                                       |
| 8033362 | INSR              | -2.02 | down | insulin receptor                                                |
| 8050176 | ITGB1BP1          | -2.02 | down | integrin beta 1 binding protein 1                               |
| 7952205 | MCAM              | -2.02 | down | melanoma cell adhesion molecule                                 |
| 7938366 | WEE1              | -2.02 | down |                                                                 |
| 8042495 | RY1               | -2.03 | down | putative nucleic acid binding protein RY-1                      |
| 7925525 | CEP170            | -2.03 | down | centrosomal protein 170kDa                                      |
| 8092328 | MCCC1             | -2.03 | down | methylcrotonoyl-Coenzyme A carboxylase 1 (alpha)                |
| 8170990 | SNORA36A          | -2.03 | down | small nucleolar RNA, H/ACA box 36A                              |
| 8113220 | ELL2              | -2.03 | down | elongation factor, RNA polymerase II, 2                         |
| 7956031 | ORMDL2            | -2.03 | down | ORM1-like 2 ( <i>S. cerevisiae</i> )                            |
| 7986394 | LRRC28            | -2.04 | down | leucine rich repeat containing 28                               |
| 7989708 | MTFMT             | -2.04 | down | mitochondrial methionyl-tRNA formyltransferase                  |
| 8131803 | IL6               | -2.05 | down | interleukin 6 (interferon, beta 2)                              |
| 7922268 | KIFAP3            | -2.05 | down | kinesin-associated protein 3                                    |
| 8127637 | TMEM30A           | -2.05 | down | transmembrane protein 30A                                       |
| 7981960 | SNRPN SNORD116-6  | -2.05 | down | small nuclear ribonucleoprotein polypeptide N   small nu        |
| 8177858 | TUBB              | -2.05 | down | tubulin, beta                                                   |
| 8179174 | TUBB              | -2.05 | down | tubulin, beta                                                   |
| 8117995 | TUBB              | -2.05 | down | tubulin, beta                                                   |
| 7952069 | C11orf60          | -2.05 | down | chromosome 11 open reading frame 60                             |
| 8006779 | ARHGAP23          | -2.05 | down | Rho GTPase activating protein 23                                |

Supplemental Table 2b  
eENPCOS vs. eENCtrl

|         |                      |       |      |                                                              |
|---------|----------------------|-------|------|--------------------------------------------------------------|
| 8157691 | LOC729012            | -2.05 | down | similar to Spindle and kinetochore-associated protein 2 (    |
| 8143957 | RHEB                 | -2.06 | down | Ras homolog enriched in brain                                |
| 7985053 | FBXO22               | -2.06 | down | F-box protein 22                                             |
| 8035304 | BST2                 | -2.06 | down | bone marrow stromal cell antigen 2                           |
| 8171802 | ACOT9                | -2.06 | down | acyl-CoA thioesterase 9                                      |
| 8155268 | POLR1E               | -2.06 | down | polymerase (RNA) I polypeptide E, 53kDa                      |
| 8116921 | EDN1                 | -2.07 | down | endothelin 1                                                 |
| 7922137 | NME7                 | -2.07 | down | non-metastatic cells 7, protein expressed in (nucleoside-    |
| 8022902 | C18orf37             | -2.08 | down | chromosome 18 open reading frame 37                          |
| 8160531 | C9orf72              | -2.08 | down | chromosome 9 open reading frame 72                           |
| 8126135 | GLO1                 | -2.08 | down | glyoxalase I                                                 |
| 8081667 | SLC35A5              | -2.08 | down | solute carrier family 35, member A5                          |
| 8082408 | SEC61A1              | -2.09 | down | Sec61 alpha 1 subunit ( <i>S. cerevisiae</i> )               |
| 7996934 | NIP7                 | -2.09 | down | nuclear import 7 homolog ( <i>S. cerevisiae</i> )            |
| 7948995 | ATL3                 | -2.10 | down | atlastin 3                                                   |
| 8149248 | LRLE1   LOC100127885 | -2.10 | down | liver-related low express protein 1   similar to liver-relat |
| 8147447 | PTDSS1               | -2.11 | down | phosphatidylserine synthase 1                                |
| 8152340 | NUDCD1               | -2.11 | down | NudC domain containing 1                                     |
| 8041383 | LTBP1                | -2.11 | down | latent transforming growth factor beta binding protein 1     |
| 8156538 | HIATL1               | -2.12 | down | hippocampus abundant transcript-like 1                       |
| 8099807 | GAFA3                | -2.12 | down | FGF-2 activity-associated protein 3                          |
| 8167006 | RP2                  | -2.12 | down | retinitis pigmentosa 2 (X-linked recessive)                  |
| 7964466 | DCTN2                | -2.13 | down | dynactin 2 (p50)                                             |
| 7926807 | PDSS1                | -2.13 | down | prenyl (decaprenyl) diphosphate synthase, subunit 1          |
| 8135235 | PMPCB                | -2.13 | down | peptidase (mitochondrial processing) beta                    |
| 8159006 | RPL7A   SNORD36B     | -2.13 | down | ribosomal protein L7a   small nucleolar RNA, C/D box 36      |
| 8055911 | LOC100129449         | -2.13 | down | PRO2055                                                      |
| 8122705 | PCMT1                | -2.14 | down | protein-L-isoaspartate (D-aspartate) O-methyltransferas      |
| 8017235 | APPBP2               | -2.14 | down | amyloid beta precursor protein (cytoplasmic tail) binding    |
| 8001410 | AKTIP                | -2.15 | down | AKT interacting protein                                      |
| 7914218 | TAF12                | -2.16 | down |                                                              |
| 8179495 | PSMB9                | -2.16 | down | proteasome (prosome, macropain) subunit, beta type, 9        |
| 8178211 | PSMB9                | -2.16 | down | proteasome (prosome, macropain) subunit, beta type, 9        |

Supplemental Table 2b  
eENPCOS vs. eENCtrl

|         |          |       |      |                                                              |
|---------|----------|-------|------|--------------------------------------------------------------|
| 8118571 | PSMB9    | -2.16 | down | proteasome (prosome, macropain) subunit, beta type, 9        |
| 8139057 | ELMO1    | -2.16 | down | engulfment and cell motility 1                               |
| 8081867 | C3orf1   | -2.16 | down | chromosome 3 open reading frame 1                            |
| 7941936 | GSTP1    | -2.17 | down | glutathione S-transferase pi                                 |
| 8141107 | SLC25A13 | -2.17 | down | solute carrier family 25, member 13 (citrin)                 |
| 7920317 | ILF2     | -2.17 | down | interleukin enhancer binding factor 2, 45kDa                 |
| 8001067 | HERC2P4  | -2.18 | down | hect domain and RLD 2 pseudogene 4                           |
| 7950933 | NOX4     | -2.18 | down | NADPH oxidase 4                                              |
| 7966135 | CORO1C   | -2.18 | down | coronin, actin binding protein, 1C                           |
| 8082478 | COPG     | -2.19 | down | coatamer protein complex, subunit gamma                      |
| 8092265 | MRPL47   | -2.20 | down | mitochondrial ribosomal protein L47                          |
| 8055862 | ARL5A    | -2.20 | down | ADP-ribosylation factor-like 5A                              |
| 7977615 | RNASE1   | -2.20 | down | ribonuclease, RNase A family, 1 (pancreatic)                 |
| 8068612 | WRB      | -2.20 | down | tryptophan rich basic protein                                |
| 7931187 | BUB3     | -2.20 | down |                                                              |
| 8102800 | SLC7A11  | -2.21 | down | solute carrier family 7, (cationic amino acid transporter, , |
| 8098556 | CCDC111  | -2.21 | down | coiled-coil domain containing 111                            |
| 8166140 | MOSPD2   | -2.21 | down | motile sperm domain containing 2                             |
| 8160016 | RANBP6   | -2.22 | down | RAN binding protein 6                                        |
| 8096415 | MMRN1    | -2.22 | down | multimerin 1                                                 |
| 8120860 | BCKDHB   | -2.22 | down | branched chain keto acid dehydrogenase E1, beta polype       |
| 8001099 | HERC2P4  | -2.22 | down | hect domain and RLD 2 pseudogene 4                           |
| 8109194 | SLC26A2  | -2.23 | down | solute carrier family 26 (sulfate transporter), member 2     |
| 8073334 | RBX1     | -2.24 | down | ring-box 1                                                   |
| 7944991 | STT3A    | -2.26 | down | STT3, subunit of the oligosaccharyltransferase complex, I    |
| 7972217 | SPRY2    | -2.29 | down | sprouty homolog 2 (Drosophila)                               |
| 8040655 | SELI     | -2.29 | down | selenoprotein I                                              |
| 8045587 | ACVR2A   | -2.29 | down | activin A receptor, type IIA                                 |
| 7953594 | EMG1     | -2.29 | down |                                                              |
| 8165642 | TMEM203  | -2.31 | down | transmembrane protein 203                                    |
| 8054479 | MALL     | -2.32 | down | mal, T-cell differentiation protein-like                     |
| 8096771 | DC2      | -2.32 | down |                                                              |
| 8096538 | RAP1GDS1 | -2.33 | down | RAP1, GTP-GDP dissociation stimulator 1                      |

Supplemental Table 2b  
eENPCOS vs. eENCtrl

|         |                      |       |      |                                                             |
|---------|----------------------|-------|------|-------------------------------------------------------------|
| 8122365 | GPR126               | -2.34 | down | G protein-coupled receptor 126                              |
| 8126853 | C6orf138             | -2.34 | down | chromosome 6 open reading frame 138                         |
| 8001496 | NUDT21               | -2.35 | down | nudix (nucleoside diphosphate linked moiety X)-type mo      |
| 7939559 | TSPAN18              | -2.35 | down | tetraspanin 18                                              |
| 7903407 | AMY2B                | -2.35 | down | amylase, alpha 2B (pancreatic)                              |
| 8112967 | TMEM167              | -2.35 | down | transmembrane protein 167                                   |
| 8030978 | LOC91664             | -2.37 | down | hypothetical protein BC007307                               |
| 8122144 | SNORA33              | -2.38 | down | small nucleolar RNA, H/ACA box 33                           |
| 8108688 | PCDHB3               | -2.39 | down | protocadherin beta 3                                        |
| 8124385 | HIST1H4F HIST1H4K    | -2.39 | down | histone cluster 1, H4b   histone cluster 4, H4   histone cl |
| 7903119 | ABCD3                | -2.41 | down | ATP-binding cassette, sub-family D (ALD), member 3          |
| 7938364 | WEE1                 | -2.42 | down |                                                             |
| 8116859 | TMEM14C              | -2.42 | down | transmembrane protein 14C                                   |
| 8056963 | LOC100129455         | -2.45 | down |                                                             |
| 8007397 | PSME3                | -2.45 | down | proteasome (prosome, macropain) activator subunit 3 (F      |
| 7915504 | ELOVL1               | -2.45 | down | elongation of very long chain fatty acids (FEN1/Elo2, SUF   |
| 8178802 | LOC133583 LOC1001336 | -2.45 | down |                                                             |
| 8090823 | SLCO2A1              | -2.46 | down | solute carrier organic anion transporter family, member     |
| 8054135 | MGAT4A               | -2.46 | down | mannosyl (alpha-1,3-)-glycoprotein beta-1,4-N-acetylglu     |
| 7923991 | PLXNA2               | -2.46 | down | plexin A2                                                   |
| 8180003 | LOC133583 LOC1001336 | -2.47 | down |                                                             |
| 7915286 | PPT1                 | -2.47 | down | palmitoyl-protein thioesterase 1 (ceroid-lipofuscinosis, n  |
| 8178811 | LOC133583 LOC1001336 | -2.48 | down |                                                             |
| 8113591 | PGGT1B               | -2.49 | down | protein geranylgeranyltransferase type I, beta subunit      |
| 8090448 | RUVBL1               | -2.49 | down | RuvB-like 1 (E. coli)                                       |
| 8170992 | SNORA56              | -2.50 | down | small nucleolar RNA, H/ACA box 56                           |
| 8177744 | PPP1R11              | -2.51 | down | protein phosphatase 1, regulatory (inhibitor) subunit 11    |
| 8117834 | PPP1R11              | -2.52 | down | protein phosphatase 1, regulatory (inhibitor) subunit 11    |
| 8097679 | LSM6                 | -2.52 | down |                                                             |
| 7953291 | CD9                  | -2.53 | down |                                                             |
| 7912198 | ENO1                 | -2.55 | down | enolase 1, (alpha)                                          |
| 8066275 | PRO0628              | -2.57 | down |                                                             |
| 8121911 | C6orf173             | -2.57 | down | chromosome 6 open reading frame 173                         |



Supplemental Table 2b  
eENPCOS vs. eENCtrl

|         |                     |       |      |                                                          |
|---------|---------------------|-------|------|----------------------------------------------------------|
| 8156905 | TMEFF1              | -2.61 | down | transmembrane protein with EGF-like and two follistatin  |
| 8052762 | GFPT1               | -2.66 | down | glutamine-fructose-6-phosphate transaminase 1            |
| 8010078 | SNORD1C             | -2.68 | down | small nucleolar RNA, C/D box 1C                          |
| 7946579 | LYVE1               | -2.69 | down | lymphatic vessel endothelial hyaluronan receptor 1       |
| 8135585 | LOC100128868        | -2.70 | down | testin-related protein TRG                               |
| 8098204 | CPE                 | -2.70 | down | carboxypeptidase E                                       |
| 7917037 | CRYZ                | -2.71 | down | crystallin, zeta (quinone reductase)                     |
| 8058927 | TMBIM1              | -2.78 | down | transmembrane BAX inhibitor motif containing 1           |
| 7907135 | SFT2D2              | -2.80 | down | SFT2 domain containing 2                                 |
| 8023191 | SMAD2               | -2.80 | down | SMAD family member 2                                     |
| 8169240 | PRPS1               | -2.88 | down | phosphoribosyl pyrophosphate synthetase 1                |
| 7935776 | PRO1933             | -2.97 | down |                                                          |
| 8141843 | LOC100133005   LOC1 | -2.98 | down | hypothetical protein FLJ21767   similar to RAS p21 prote |
| 7926545 | PLXDC2              | -3.15 | down | plexin domain containing 2                               |
| 8105348 | LOC493869           | -3.27 | down | similar to RIKEN cDNA 2310016C16                         |
| 7981943 | SNRPN  SNORD64  P,  | -3.31 | down | Prader-Willi/Angelman syndrome-5   small nuclear ribor   |
| 8162880 | MRPL50              | -3.34 | down | mitochondrial ribosomal protein L50                      |
| 8139087 | SFRP4               | -3.53 | down | secreted frizzled-related protein 4                      |
| 7930870 | TOMM22              | -3.54 | down | translocase of outer mitochondrial membrane 22 homol     |
| 8167163 | CXorf24             | -4.21 | down | chromosome X open reading frame 24                       |
| 7951038 | SNORA40  JOSD3      | -4.37 | down | small nucleolar RNA, H/ACA box 40   Josephin domain cc   |
| 8017843 | SLC16A6             | -4.65 | down | solute carrier family 16, member 6 (monocarboxylic acid  |
| 7977270 | LOC388022           | -4.76 | down | hypothetical gene supported by AK131040                  |
| 7952046 | MPZL2               | -5.42 | down | myelin protein zero-like 2                               |
| 8010978 | LOC100130876        | -5.43 | down |                                                          |

Supplemental Table 2c  
eSFPCOS vs. eSFCtrl

| Transcripts Cluster Id | Genesymbol     | eSFPCOS vs. eSFCtrl | Regulation | Genedescription                                                       |
|------------------------|----------------|---------------------|------------|-----------------------------------------------------------------------|
| 8056611                | LRP2           | 3.62                | up         | low density lipoprotein-related protein 2                             |
| 7943530                | GRIA4          | 3.36                | up         | glutamate receptor, ionotropic, AMPA 4                                |
| 8006433                | CCL2           | 3.31                | up         | chemokine (C-C motif) ligand 2                                        |
| 8159850                | FLJ35024       | 3.05                | up         | hypothetical LOC401491                                                |
| 7948900                | SNORD30        | 2.91                | up         | small nucleolar RNA, C/D box 30                                       |
| 8025601                | ICAM1          | 2.87                | up         | intercellular adhesion molecule 1 (CD54), human rhinovirus receptor   |
| 8010978                | LOC100130876   | 2.86                | up         |                                                                       |
| 8147132                | CA2            | 2.84                | up         | carbonic anhydrase II                                                 |
| 7922418                | SNORD74        | 2.79                | up         | small nucleolar RNA, C/D box 74                                       |
| 7948906                | SNORD27 SNHG1  | 2.52                | up         | small nucleolar RNA, C/D box 27   small nucleolar RNA host gene (non- |
| 8122265                | TNFAIP3        | 2.51                | up         | tumor necrosis factor, alpha-induced protein 3                        |
| 8092578                | ETV5           | 2.51                | up         | ets variant gene 5 (ets-related molecule)                             |
| 7974902                | RHOJ           | 2.49                | up         | ras homolog gene family, member J                                     |
| 8092169                | TNFSF10        | 2.46                | up         | tumor necrosis factor (ligand) superfamily, member 10                 |
| 8154100                | VLDLR          | 2.43                | up         | very low density lipoprotein receptor                                 |
| 7948904                | SNORD28        | 2.41                | up         | small nucleolar RNA, C/D box 28                                       |
| 8042144                | REL            | 2.39                | up         | v-rel reticuloendotheliosis viral oncogene homolog (avian)            |
| 8014956                | NR1D1 THRA     | 2.35                | up         | nuclear receptor subfamily 1, group D, member 1   thyroid hormone re  |
| 7986509                | LOC441734      | 2.34                | up         | similar to hypothetical protein DKFZp43411020                         |
| 7986527                | C15orf51       | 2.34                | up         | chromosome 15 open reading frame 51                                   |
| 8146794                | DEPDC2         | 2.32                | up         | DEP domain containing 2                                               |
| 8019802                | JU2 RNU2B WDR  | 2.31                | up         | RNA, U2 small nuclear   RNA, U2B small nuclear   WD repeat domain 7   |
| 8116983                | CD83           | 2.30                | up         |                                                                       |
| 7952339                | LOC85389       | 2.30                | up         | RNA, small nucleolar                                                  |
| 7942791                | C100008589 WDF | 2.27                | up         | 28S ribosomal RNA   WD repeat domain 88                               |
| 8019709                | JU2 RNU2B WDR  | 2.26                | up         | RNA, U2 small nuclear   RNA, U2B small nuclear   WD repeat domain 7   |
| 8138289                | ETV1           | 2.26                | up         | ets variant gene 1                                                    |
| 8030128                | PPP1R15A       | 2.25                | up         | protein phosphatase 1, regulatory (inhibitor) subunit 15A             |
| 8019631                | JU2 RNU2B WDR  | 2.25                | up         | RNA, U2 small nuclear   RNA, U2B small nuclear   WD repeat domain 7   |
| 8019707                | JU2 RNU2B WDR  | 2.25                | up         | RNA, U2 small nuclear   RNA, U2B small nuclear   WD repeat domain 7   |
| 8019641                | JU2 RNU2B WDR  | 2.25                | up         | RNA, U2 small nuclear   RNA, U2B small nuclear   WD repeat domain 7   |
| 8019639                | JU2 RNU2B WDR  | 2.25                | up         | RNA, U2 small nuclear   RNA, U2B small nuclear   WD repeat domain 7   |

Supplemental Table 2c  
eSFPCOS vs. eSFCtrl

|         |                 |      |    |                                                                         |
|---------|-----------------|------|----|-------------------------------------------------------------------------|
| 8019633 | JU2 RNU2B WDR   | 2.25 | up | RNA, U2 small nuclear   RNA, U2B small nuclear   WD repeat domain 7     |
| 8019635 | JU2 RNU2B WDR   | 2.25 | up | RNA, U2 small nuclear   RNA, U2B small nuclear   WD repeat domain 7     |
| 8019637 | JU2 RNU2B WDR   | 2.25 | up | RNA, U2 small nuclear   RNA, U2B small nuclear   WD repeat domain 7     |
| 8019705 | JU2 RNU2B WDR   | 2.25 | up | RNA, U2 small nuclear   RNA, U2B small nuclear   WD repeat domain 7     |
| 8019703 | JU2 RNU2B WDR   | 2.25 | up | RNA, U2 small nuclear   RNA, U2B small nuclear   WD repeat domain 7     |
| 8008588 | HLF             | 2.21 | up | hepatic leukemia factor                                                 |
| 8179399 | C4A C4B         | 2.20 | up | complement component 4A (Rodgers blood group)   complement com          |
| 8118409 | C4A C4B         | 2.20 | up | complement component 4A (Rodgers blood group)   complement com          |
| 8118455 | C4A C4B         | 2.19 | up | complement component 4A (Rodgers blood group)   complement com          |
| 7954310 | LOC100008588    | 2.19 | up | 18S ribosomal RNA                                                       |
| 8114010 | IRF1            | 2.17 | up | interferon regulatory factor 1                                          |
| 8028652 | ZFP36           | 2.12 | up | zinc finger protein 36, C3H type, homolog (mouse)                       |
| 7933872 | EGR2            | 2.11 | up | early growth response 2 (Krox-20 homolog, Drosophila)                   |
| 8000636 | 132247 DKFZp54  | 2.10 | up | similar to nuclear pore complex interacting protein   KIAA0220-like pro |
| 7904506 | 1245 NBPF11 NB  | 2.05 | up | neuroblastoma breakpoint family, member 15   neuroblastoma breakp       |
| 7904562 | 1BPF14 NBPF20 N | 2.04 | up | neuroblastoma breakpoint family, member 16   neuroblastoma breakp       |
| 8131944 | NFE2L3          | 2.03 | up | nuclear factor (erythroid-derived 2)-like 3                             |
| 8029693 | FOSB            | 2.03 | up | FBJ murine osteosarcoma viral oncogene homolog B                        |
| 7904874 | 14 NBPF20 NBPF5 | 2.02 | up | neuroblastoma breakpoint family, member 16   neuroblastoma breakp       |
| 8160912 | C9orf131        | 1.92 | up | chromosome 9 open reading frame 131                                     |
| 8059708 | SNORA75         | 1.83 | up | small nucleolar RNA, H/ACA box 75                                       |
| 8013272 | 4A CCDC144B CC  | 1.82 | up | coiled-coil domain containing 144A   coiled-coil domain containing 144  |
| 8059576 | PID1            | 1.82 | up | phosphotyrosine interaction domain containing 1                         |
| 7951593 | FLJ45803        | 1.81 | up |                                                                         |
| 7972826 | C13orf29        | 1.77 | up | chromosome 13 open reading frame 29                                     |
| 8066275 | PRO0628         | 1.77 | up |                                                                         |
| 8169350 | LOC100134364    | 1.73 | up |                                                                         |
| 7995681 | MMP2            | 1.72 | up | matrix metalloproteinase 2 (gelatinase A, 72kDa gelatinase, 72kDa type  |
| 7981986 | 16-16 SNORD116- | 1.67 | up | small nuclear ribonucleoprotein polypeptide N   small nucleolar RNA, C  |
| 7981982 | 16-16 SNORD116- | 1.67 | up | small nuclear ribonucleoprotein polypeptide N   small nucleolar RNA, C  |
| 8005204 | 4A CCDC144B CC  | 1.65 | up | coiled-coil domain containing 144A   coiled-coil domain containing 144  |
| 8058857 | IGFBP5          | 1.63 | up | insulin-like growth factor binding protein 5                            |
| 8077366 | LRRN1           | 1.62 | up | leucine rich repeat neuronal 1                                          |

Supplemental Table 2c  
eSFPCOS vs. eSFCtrl

|         |                         |      |    |                                                                                                           |
|---------|-------------------------|------|----|-----------------------------------------------------------------------------------------------------------|
| 8117995 | TUBB                    | 1.62 | up | tubulin, beta                                                                                             |
| 8177858 | TUBB                    | 1.62 | up | tubulin, beta                                                                                             |
| 8179174 | TUBB                    | 1.61 | up | tubulin, beta                                                                                             |
| 7981976 | NRPN SNORD116-1         | 1.59 | up | small nuclear ribonucleoprotein polypeptide N   small nucleolar RNA, C                                    |
| 8055911 | LOC100129449            | 1.57 | up | PRO2055                                                                                                   |
| 7904478 | 51152 LOC100129449      | 1.57 | up | melanoma antigen   hypothetical protein LOC100129030                                                      |
| 8117372 | HIST1H2AC               | 1.56 | up | histone cluster 1, H2ac                                                                                   |
| 7939237 | C11orf41                | 1.56 | up | chromosome 11 open reading frame 41                                                                       |
| 8117402 | HIST1H4F HIST1H4H       | 1.55 | up | histone cluster 1, H4e   histone cluster 4, H4   histone cluster 2, H4b                                   |
| 8095680 | IL8                     | 1.54 | up | interleukin 8                                                                                             |
| 7947512 | DKFZP586H2123           | 1.54 | up | regeneration associated muscle protease                                                                   |
| 7969288 | OLFM4                   | 1.54 | up | olfactomedin 4                                                                                            |
| 7981988 | SNORD116-20 SNCR        | 1.52 | up | small nuclear ribonucleoprotein polypeptide N   small nucleolar RNA, C                                    |
| 7907135 | SFT2D2                  | 1.51 | up | SFT2 domain containing 2                                                                                  |
| 7905548 | SPRR3                   | 1.51 | up | small proline-rich protein 3                                                                              |
| 7905079 | HIST2AA3 HIST2H2        | 1.49 | up | histone cluster 2, H2aa3   histone cluster 2, H2aa4                                                       |
| 7919619 | HIST2H2AA4 HIST2H2A3    | 1.49 | up | histone cluster 2, H2aa3   histone cluster 2, H2aa4   histone cluster 2, H2aa3                            |
| 7904726 | TXNIP                   | 1.49 | up | thioredoxin interacting protein                                                                           |
| 8152522 | ENPP2                   | 1.49 | up | ectonucleotide pyrophosphatase/phosphodiesterase 2 (autotaxin)                                            |
| 7977270 | LOC388022               | 1.48 | up | hypothetical gene supported by AK131040                                                                   |
| 7981943 | NRPN SNORD64 SNORD116-1 | 1.48 | up | Prader-Willi/Angelman syndrome-5   small nuclear ribonucleoprotein polypeptide N   small nucleolar RNA, C |
| 7953385 | GAPDH                   | 1.45 | up | glyceraldehyde-3-phosphate dehydrogenase                                                                  |
| 7915472 | SLC2A1                  | 1.45 | up | solute carrier family 2 (facilitated glucose transporter), member 1                                       |
| 8155453 | 100129030 LOC511001     | 1.41 | up | hypothetical protein LOC100129030   melanoma antigen                                                      |
| 8161375 | 100129030 LOC511001     | 1.41 | up | hypothetical protein LOC100129030   melanoma antigen                                                      |
| 8102800 | SLC7A11                 | 1.40 | up | solute carrier family 7, (cationic amino acid transporter, y+ system) member 11                           |
| 8030978 | LOC91664                | 1.39 | up | hypothetical protein BC007307                                                                             |
| 7960896 | OR650293 OR7E12         | 1.37 | up | seven transmembrane helix receptor   olfactory receptor, family 7, subfamily 12, member 2                 |
| 8130578 | SNORA20                 | 1.36 | up | small nucleolar RNA, H/ACA box 20                                                                         |
| 7920337 | INTS3                   | 1.35 | up | integrator complex subunit 3                                                                              |
| 7965873 | IGF1                    | 1.34 | up | insulin-like growth factor 1 (somatomedin C)                                                              |
| 8140650 | SEMA3E                  | 1.33 | up | sema domain, immunoglobulin domain (Ig), short basic domain, secreted                                     |
| 7904695 | SEC22B                  | 1.32 | up | SEC22 vesicle trafficking protein homolog B (S. cerevisiae)                                               |

Supplemental Table 2c  
eSFPCOS vs. eSFCtrl

|         |                       |      |    |                                                                              |
|---------|-----------------------|------|----|------------------------------------------------------------------------------|
| 7937802 | CD81                  | 1.31 | up |                                                                              |
| 8092165 | GHSR                  | 1.31 | up | growth hormone secretagogue receptor                                         |
| 7960947 | A2M                   | 1.31 | up | alpha-2-macroglobulin                                                        |
| 7931748 | IDI2                  | 1.30 | up | isopentenyl-diphosphate delta isomerase 2                                    |
| 8156538 | HIATL1                | 1.30 | up | hippocampus abundant transcript-like 1                                       |
| 7903119 | ABCD3                 | 1.30 | up | ATP-binding cassette, sub-family D (ALD), member 3                           |
| 8159006 | RPL7A SNORD36B        | 1.29 | up | ribosomal protein L7a   small nucleolar RNA, C/D box 36B                     |
| 8113800 | FBN2                  | 1.29 | up | fibrillin 2 (congenital contractural arachnodactyly)                         |
| 8095303 | LPHN3                 | 1.28 | up | latrophilin 3                                                                |
| 8015323 | KRT13 GUCA1B          | 1.28 | up | keratin 13   guanylate cyclase activator 1B (retina)                         |
| 8100378 | LOC402176             | 1.28 | up | similar to 60S ribosomal protein L21                                         |
| 7910229 | ARF1                  | 1.28 | up | ADP-ribosylation factor 1                                                    |
| 8123744 | F13A1                 | 1.27 | up | coagulation factor XIII, A1 polypeptide                                      |
| 8037053 | CEACAM7               | 1.27 | up | carcinoembryonic antigen-related cell adhesion molecule 7                    |
| 8179224 | C6orf205              | 1.27 | up | chromosome 6 open reading frame 205                                          |
| 7926545 | PLXDC2                | 1.27 | up | plexin domain containing 2                                                   |
| 8019183 | ACTG1                 | 1.26 | up | actin, gamma 1                                                               |
| 8055220 | A26C1A A26C1B         | 1.26 | up | ANKRD26-like family C, member 1A   ANKRD26-like family C, member 1B          |
| 8175835 | BCAP31                | 1.24 | up | B-cell receptor-associated protein 31                                        |
| 8058927 | TMBIM1                | 1.24 | up | transmembrane BAX inhibitor motif containing 1                               |
| 8179139 | MRPS18B               | 1.24 | up | mitochondrial ribosomal protein S18B                                         |
| 8177824 | MRPS18B               | 1.24 | up | mitochondrial ribosomal protein S18B                                         |
| 8007561 | G6PC3                 | 1.24 | up | glucose 6 phosphatase, catalytic, 3                                          |
| 8118069 | C6orf205              | 1.24 | up | chromosome 6 open reading frame 205                                          |
| 8158167 | LCN2                  | 1.24 | up | lipocalin 2                                                                  |
| 8117834 | PPP1R11               | 1.24 | up | protein phosphatase 1, regulatory (inhibitor) subunit 11                     |
| 8177744 | PPP1R11               | 1.24 | up | protein phosphatase 1, regulatory (inhibitor) subunit 11                     |
| 7925320 | NID1                  | 1.23 | up | nidogen 1                                                                    |
| 7899480 | SNORA73A              | 1.23 | up | small nucleolar RNA, H/ACA box 73A                                           |
| 8117955 | MRPS18B               | 1.23 | up | mitochondrial ribosomal protein S18B                                         |
| 8055151 | ANKRD26 A26C1A FKBP1B | 1.23 | up | ANKRD26-like family C, member 1B   ANKRD26-like family C, member 1A   FKBP1B |
| 8177931 | C6orf205              | 1.23 | up | chromosome 6 open reading frame 205                                          |
| 8066528 | PIGT                  | 1.22 | up | phosphatidylinositol glycan anchor biosynthesis, class T                     |

Supplemental Table 2c  
eSFPCOS vs. eSFCtrl

|         |                  |      |    |                                                                                   |
|---------|------------------|------|----|-----------------------------------------------------------------------------------|
| 7944991 | STT3A            | 1.22 | up | STT3, subunit of the oligosaccharyltransferase complex, homolog A (S. cerevisiae) |
| 8082408 | SEC61A1          | 1.22 | up | Sec61 alpha 1 subunit (S. cerevisiae)                                             |
| 7900365 | MFSD2            | 1.21 | up | major facilitator superfamily domain containing 2                                 |
| 8124385 | IST1H4F HIST1H4I | 1.21 | up | histone cluster 1, H4b   histone cluster 4, H4   histone cluster 2, H4b           |
| 8113591 | PGGT1B           | 1.20 | up | protein geranylgeranyltransferase type I, beta subunit                            |
| 7981427 | CKB              | 1.20 | up | creatine kinase, brain                                                            |
| 8152617 | HAS2             | 1.19 | up | hyaluronan synthase 2                                                             |
| 8149248 | LE1 LOC10012781  | 1.19 | up | liver-related low express protein 1   similar to liver-related low express        |
| 7967620 | X37 LOC1001325   | 1.19 | up | DEAH (Asp-Glu-Ala-His) box polypeptide 37   hypothetical protein LOC1001325       |
| 8117377 | HIST1H1E         | 1.19 | up | histone cluster 1, H1e                                                            |
| 8095080 | PDGFRA           | 1.19 | up | platelet-derived growth factor receptor, alpha polypeptide                        |
| 8139087 | SFRP4            | 1.19 | up | secreted frizzled-related protein 4                                               |
| 7951038 | SNORA40 JOSD3    | 1.18 | up | small nucleolar RNA, H/ACA box 40   Josephin domain containing 3                  |
| 8155591 | B RP11-195B21.3  | 1.18 | up | ankyrin repeat domain 20B   hypothetical LOC644249   coiled-coil domain           |
| 8137979 | ACTB             | 1.17 | up | actin, beta                                                                       |
| 8045587 | ACVR2A           | 1.17 | up | activin A receptor, type IIA                                                      |
| 7960865 | SLC2A3           | 1.17 | up | solute carrier family 2 (facilitated glucose transporter), member 3               |
| 8108251 | NPY6R            | 1.17 | up | neuropeptide Y receptor Y6 (pseudogene)                                           |
| 8078014 | SLC6A6           | 1.16 | up | solute carrier family 6 (neurotransmitter transporter, taurine), member 6         |
| 7930870 | TOMM22           | 1.16 | up | translocase of outer mitochondrial membrane 22 homolog (yeast)                    |
| 8001099 | HERC2P4          | 1.16 | up | hect domain and RLD 2 pseudogene 4                                                |
| 7922969 | PDC              | 1.16 | up | phosducin                                                                         |
| 8134263 | COL1A2           | 1.16 | up | collagen, type I, alpha 2                                                         |
| 7998722 | SNORD60          | 1.16 | up | small nucleolar RNA, C/D box 60                                                   |
| 7985398 | FAM154B          | 1.15 | up | family with sequence similarity 154, member B                                     |
| 8001067 | HERC2P4          | 1.15 | up | hect domain and RLD 2 pseudogene 4                                                |
| 8126853 | C6orf138         | 1.14 | up | chromosome 6 open reading frame 138                                               |
| 7939559 | TSPAN18          | 1.14 | up | tetraspanin 18                                                                    |
| 8101659 | SPARCL1          | 1.14 | up | SPARC-like 1 (mast9, hevin)                                                       |
| 8131719 | DNAH11           | 1.14 | up | dynein, axonemal, heavy chain 11                                                  |
| 7920317 | ILF2             | 1.13 | up | interleukin enhancer binding factor 2, 45kDa                                      |
| 8145470 | DPYSL2           | 1.13 | up | dihydropyrimidinase-like 2                                                        |
| 7953603 | C1S              | 1.13 | up | complement component 1, s subcomponent                                            |

Supplemental Table 2c  
eSFPCOS vs. eSFCtrl

|         |            |      |    |                                                                           |
|---------|------------|------|----|---------------------------------------------------------------------------|
| 8161755 | ALDH1A1    | 1.13 | up | aldehyde dehydrogenase 1 family, member A1                                |
| 8178295 | UBD GABBR1 | 1.13 | up | ubiquitin D   gamma-aminobutyric acid (GABA) B receptor, 1                |
| 8075423 | DUSP18     | 1.13 | up | dual specificity phosphatase 18                                           |
| 8010078 | SNORD1C    | 1.12 | up | small nucleolar RNA, C/D box 1C                                           |
| 8006779 | ARHGAP23   | 1.11 | up | Rho GTPase activating protein 23                                          |
| 8059905 | COL6A3     | 1.11 | up | collagen, type VI, alpha 3                                                |
| 8092970 | APOD       | 1.11 | up | apolipoprotein D                                                          |
| 8133360 | CLDN4      | 1.10 | up | claudin 4                                                                 |
| 8134339 | PEG10      | 1.10 | up | paternally expressed 10                                                   |
| 7923991 | PLXNA2     | 1.10 | up | plexin A2                                                                 |
| 7939314 | EHF        | 1.10 | up | ets homologous factor                                                     |
| 7959330 | WDR66      | 1.10 | up | WD repeat domain 66                                                       |
| 8157446 | ORM1       | 1.09 | up | orosomuroid 1                                                             |
| 7903393 | S1PR1      | 1.09 | up | sphingosine-1-phosphate receptor 1                                        |
| 8169240 | PRPS1      | 1.09 | up | phosphoribosyl pyrophosphate synthetase 1                                 |
| 7915504 | ELOVL1     | 1.09 | up | elongation of very long chain fatty acids (FEN1/Elo2, SUR4/Elo3, yeast)   |
| 8033362 | INSR       | 1.09 | up | insulin receptor                                                          |
| 8017057 | C17orf47   | 1.08 | up | chromosome 17 open reading frame 47                                       |
| 8130129 | NUP43      | 1.08 | up | nucleoporin 43kDa                                                         |
| 7976496 | SERPINA3   | 1.08 | up | serpin peptidase inhibitor, clade A (alpha-1 antiproteinase, antitrypsin) |
| 7945991 | OR51E2     | 1.08 | up | olfactory receptor, family 51, subfamily E, member 2                      |
| 8090823 | SLCO2A1    | 1.08 | up | solute carrier organic anion transporter family, member 2A1               |
| 8121622 | RSHL3      | 1.08 | up | radial spokehead-like 3                                                   |
| 8091511 | P2RY14     | 1.08 | up | purinergic receptor P2Y, G-protein coupled, 14                            |
| 7981068 | SERPINA1   | 1.08 | up | serpin peptidase inhibitor, clade A (alpha-1 antiproteinase, antitrypsin) |
| 7922137 | NME7       | 1.07 | up | non-metastatic cells 7, protein expressed in (nucleoside-diphosphate ki   |
| 8167163 | CXorf24    | 1.07 | up | chromosome X open reading frame 24                                        |
| 7950307 | UCP2       | 1.07 | up | uncoupling protein 2 (mitochondrial, proton carrier)                      |
| 8115327 | SPARC      | 1.07 | up | secreted protein, acidic, cysteine-rich (osteonectin)                     |
| 8113220 | ELL2       | 1.07 | up | elongation factor, RNA polymerase II, 2                                   |
| 8082012 | SLC15A2    | 1.07 | up | solute carrier family 15 (H+/peptide transporter), member 2               |
| 8170990 | SNORA36A   | 1.07 | up | small nucleolar RNA, H/ACA box 36A                                        |
| 8157450 | ORM2       | 1.07 | up | orosomuroid 2                                                             |

Supplemental Table 2c  
eSFPCOS vs. eSFCtrl

|         |                   |      |    |                                                                       |
|---------|-------------------|------|----|-----------------------------------------------------------------------|
| 8154892 | DNAI1             | 1.06 | up | dynein, axonemal, intermediate chain 1                                |
| 8178598 | CLIC1             | 1.06 | up | chloride intracellular channel 1                                      |
| 7988467 | FBN1              | 1.06 | up | fibrillin 1                                                           |
| 8053741 | ANKRD20A3 ANKRD   | 1.06 | up | ankyrin repeat domain 20B   ankyrin repeat domain 20 family, membe    |
| 8124650 | UBD GABBR1        | 1.06 | up | ubiquitin D   gamma-aminobutyric acid (GABA) B receptor, 1            |
| 7930593 | C10orf81          | 1.06 | up | chromosome 10 open reading frame 81                                   |
| 7976812 | SNORD113-4        | 1.06 | up | small nucleolar RNA, C/D box 113-4                                    |
| 8088322 | DNAH12L           | 1.05 | up | dynein, axonemal, heavy chain 12-like                                 |
| 7957673 | C12orf55 FLJ34470 | 1.05 | up | chromosome 12 open reading frame 55   hypothetical protein LOC6431    |
| 8052762 | GFPT1             | 1.05 | up | glutamine-fructose-6-phosphate transaminase 1                         |
| 8090180 | MUC13             | 1.05 | up | mucin 13, cell surface associated                                     |
| 8012896 | PMP22             | 1.05 | up | peripheral myelin protein 22                                          |
| 8112274 | ELOVL7            | 1.05 | up | ELOVL family member 7, elongation of long chain fatty acids (yeast)   |
| 7941936 | GSTP1             | 1.05 | up | glutathione S-transferase pi                                          |
| 7952205 | MCAM              | 1.05 | up | melanoma cell adhesion molecule                                       |
| 8120679 | DDX43             | 1.05 | up | DEAD (Asp-Glu-Ala-Asp) box polypeptide 43                             |
| 8148040 | MAL2              | 1.04 | up | mal, T-cell differentiation protein 2                                 |
| 8072876 | LGALS1            | 1.04 | up | lectin, galactoside-binding, soluble, 1 (galectin 1)                  |
| 8008040 | LRRC46            | 1.04 | up | leucine rich repeat containing 46                                     |
| 7968866 | C13orf30          | 1.04 | up | chromosome 13 open reading frame 30                                   |
| 8135341 | FLJ23834          | 1.04 | up |                                                                       |
| 8043504 | MAL               | 1.04 | up | mal, T-cell differentiation protein                                   |
| 7959681 | DNAH10            | 1.04 | up | dynein, axonemal, heavy chain 10                                      |
| 8035304 | BST2              | 1.04 | up | bone marrow stromal cell antigen 2                                    |
| 7931108 | DMBT1             | 1.04 | up | deleted in malignant brain tumors 1                                   |
| 7991386 | CIB1              | 1.04 | up | calcium and integrin binding 1 (calmyrin)                             |
| 8083743 | ARL14             | 1.03 | up | ADP-ribosylation factor-like 14                                       |
| 8054135 | MGAT4A            | 1.03 | up | mannosyl (alpha-1,3-)-glycoprotein beta-1,4-N-acetylglucosaminyltrans |
| 8081667 | SLC35A5           | 1.03 | up | solute carrier family 35, member A5                                   |
| 8057056 | TTN               | 1.03 | up | titin                                                                 |
| 8017235 | APPBP2            | 1.03 | up | amyloid beta precursor protein (cytoplasmic tail) binding protein 2   |
| 7952069 | C11orf60          | 1.03 | up | chromosome 11 open reading frame 60                                   |
| 8173179 | RP11-278E11.2     | 1.03 | up | ubiquinol-cytochrome c reductase binding protein pseudogene           |



Supplemental Table 2c  
eSFPCOS vs. eSFCtrl

|         |                  |       |      |                                                                          |
|---------|------------------|-------|------|--------------------------------------------------------------------------|
| 8034342 | ZNF625 ZNF20     | 1.03  | up   | zinc finger protein 625   zinc finger protein 20                         |
| 8141107 | SLC25A13         | 1.03  | up   | solute carrier family 25, member 13 (citrin)                             |
| 7946579 | LYVE1            | 1.02  | up   | lymphatic vessel endothelial hyaluronan receptor 1                       |
| 8085062 | IL5RA            | 1.02  | up   | interleukin 5 receptor, alpha                                            |
| 7921862 | C1orf192         | 1.02  | up   | chromosome 1 open reading frame 192                                      |
| 8054200 | LYG2             | 1.02  | up   | lysozyme G-like 2                                                        |
| 8147447 | PTDSS1           | 1.02  | up   | phosphatidylserine synthase 1                                            |
| 8139057 | ELMO1            | 1.02  | up   | engulfment and cell motility 1                                           |
| 8046922 | COL3A1           | 1.02  | up   | collagen, type III, alpha 1 (Ehlers-Danlos syndrome type IV, autosomal c |
| 8172022 | TMEM47           | 1.01  | up   | transmembrane protein 47                                                 |
| 7920291 | S100A16          | 1.01  | up   | S100 calcium binding protein A16                                         |
| 8108256 | MYOT             | 1.01  | up   | myotilin                                                                 |
| 7948995 | ATL3             | 1.01  | up   | atlastin 3                                                               |
| 8083494 | MME              | 1.01  | up   | membrane metallo-endopeptidase                                           |
| 8057377 | CDC141 LOC285026 | 1.01  | up   | coiled-coil domain containing 141   hypothetical protein LOC285026       |
| 8066745 | ZNF334           | 1.01  | up   | zinc finger protein 334                                                  |
| 8077270 | CHL1             | 1.01  | up   | cell adhesion molecule with homology to L1CAM (close homolog of L1)      |
| 7939642 | CREB3L1          | 1.00  | up   | cAMP responsive element binding protein 3-like 1                         |
| 8010243 | SYNGR2           | 1.00  | up   | synaptogyrin 2                                                           |
| 7897966 | C1orf158         | 1.00  | up   | chromosome 1 open reading frame 158                                      |
| 8080863 | FLJ44379         | -1.00 | down | similar to S-100 protein, alpha chain                                    |
| 7902738 | CLCA4            | -1.00 | down | chloride channel, calcium activated, family member 4                     |
| 7932453 | NEBL             | -1.00 | down | nebulette                                                                |
| 7899615 | SERINC2 KIAA0746 | -1.00 | down | serine incorporator 2   KIAA0746 protein                                 |
| 8101322 | MOP-1            | -1.01 | down |                                                                          |
| 8056963 | LOC100129455     | -1.01 | down |                                                                          |
| 7965403 | LUM              | -1.01 | down | lumican                                                                  |
| 8004889 | WDR16            | -1.01 | down | WD repeat domain 16                                                      |
| 7917850 | ARHGAP29         | -1.01 | down | Rho GTPase activating protein 29                                         |
| 8120860 | BCKDHB           | -1.01 | down | branched chain keto acid dehydrogenase E1, beta polypeptide (maple s     |
| 8108688 | PCDHB3           | -1.01 | down | protocadherin beta 3                                                     |
| 7943740 | FLJ46266         | -1.01 | down |                                                                          |
| 8142646 | IQUB             | -1.01 | down | IQ motif and ubiquitin domain containing                                 |

Supplemental Table 2c  
eSFPCOS vs. eSFCtrl

|         |                  |       |      |                                                                          |
|---------|------------------|-------|------|--------------------------------------------------------------------------|
| 8003667 | SERPINF1         | -1.02 | down | serpin peptidase inhibitor, clade F (alpha-2 antiplasmin, pigment epithe |
| 8160016 | RANBP6           | -1.02 | down | RAN binding protein 6                                                    |
| 7903959 | C1orf88          | -1.02 | down | chromosome 1 open reading frame 88                                       |
| 8155268 | POLR1E           | -1.02 | down | polymerase (RNA) I polypeptide E, 53kDa                                  |
| 8088299 | DNHD2            | -1.02 | down | dynein heavy chain domain 2                                              |
| 8017061 | TEX14            | -1.02 | down | testis expressed 14                                                      |
| 8001496 | NUDT21           | -1.02 | down | nudix (nucleoside diphosphate linked moiety X)-type motif 21             |
| 7932407 | ST8SIA6          | -1.02 | down | ST8 alpha-N-acetyl-neuraminide alpha-2,8-sialyltransferase 6             |
| 7907232 | C1orf129         | -1.02 | down | chromosome 1 open reading frame 129                                      |
| 8093278 | GD LOC10013255   | -1.02 | down | homogentisate 1,2-dioxygenase (homogentisate oxidase)   similar to h     |
| 8017597 | hCG_1793136      | -1.02 | down | similar to ribosomal protein L31                                         |
| 8122071 | ENPP3            | -1.02 | down | ectonucleotide pyrophosphatase/phosphodiesterase 3                       |
| 8063601 | C20orf85         | -1.02 | down | chromosome 20 open reading frame 85                                      |
| 7957140 | LGR5             | -1.03 | down | leucine-rich repeat-containing G protein-coupled receptor 5              |
| 8089851 | GD LOC10013255   | -1.03 | down | homogentisate 1,2-dioxygenase (homogentisate oxidase)   similar to h     |
| 7912198 | ENO1             | -1.03 | down | enolase 1, (alpha)                                                       |
| 8091799 | orf57 LOC1001292 | -1.03 | down | chromosome 3 open reading frame 57   hypothetical protein LOC1001        |
| 8088315 | ASB14 DNAH12     | -1.03 | down | ankyrin repeat and SOCS box-containing 14   dynein, axonemal, heavy      |
| 7996934 | NIP7             | -1.03 | down | nuclear import 7 homolog ( <i>S. cerevisiae</i> )                        |
| 7983478 | C15orf48         | -1.03 | down | chromosome 15 open reading frame 48                                      |
| 7950933 | NOX4             | -1.03 | down | NADPH oxidase 4                                                          |
| 8040672 | C2orf39          | -1.03 | down | chromosome 2 open reading frame 39                                       |
| 8091887 | ZBBX             | -1.04 | down | zinc finger, B-box domain containing                                     |
| 7940323 | MS4A8B           | -1.04 | down | membrane-spanning 4-domains, subfamily A, member 8B                      |
| 8010139 | SEC14L1          | -1.04 | down | SEC14-like 1 ( <i>S. cerevisiae</i> )                                    |
| 8099524 | LDB2             | -1.04 | down | LIM domain binding 2                                                     |
| 8111019 | DNAH5            | -1.04 | down | dynein, axonemal, heavy chain 5                                          |
| 7968632 | RP11-251J8.3     | -1.04 | down | hypothetical LOC646871                                                   |
| 8091922 | WDR49            | -1.04 | down | WD repeat domain 49                                                      |
| 8143957 | RHEB             | -1.04 | down | Ras homolog enriched in brain                                            |
| 8102792 | PCDH18           | -1.05 | down | protocadherin 18                                                         |
| 7912347 | CASZ1            | -1.05 | down | castor zinc finger 1                                                     |
| 8094533 | FLJ16686         | -1.05 | down |                                                                          |

Supplemental Table 2c  
eSFPCOS vs. eSFCtrl

|         |                 |       |      |                                                                             |
|---------|-----------------|-------|------|-----------------------------------------------------------------------------|
| 7947156 | MUC15           | -1.05 | down | mucin 15, cell surface associated                                           |
| 8005955 | SNORD42A        | -1.05 | down | small nucleolar RNA, C/D box 42A                                            |
| 8116921 | EDN1            | -1.05 | down | endothelin 1                                                                |
| 7942941 | CCDC81          | -1.05 | down | coiled-coil domain containing 81                                            |
| 8107591 | ZNF474          | -1.05 | down | zinc finger protein 474                                                     |
| 7985053 | FBXO22          | -1.05 | down | F-box protein 22                                                            |
| 8124562 | ZNF323          | -1.05 | down | zinc finger protein 323                                                     |
| 8085867 | NEK10           | -1.06 | down | NIMA (never in mitosis gene a)- related kinase 10                           |
| 8057463 | CERKL           | -1.06 | down | ceramide kinase-like                                                        |
| 8019831 | CLUL1           | -1.06 | down | clusterin-like 1 (retinal)                                                  |
| 7903407 | AMY2B           | -1.06 | down | amylase, alpha 2B (pancreatic)                                              |
| 8114856 | PLAC8L1         | -1.06 | down | PLAC8-like 1                                                                |
| 8138392 | AGR3            | -1.07 | down | anterior gradient homolog 3 ( <i>Xenopus laevis</i> )                       |
| 8040655 | SELI            | -1.07 | down | selenoprotein I                                                             |
| 8007420 | AOC3            | -1.07 | down | amine oxidase, copper containing 3 (vascular adhesion protein 1)            |
| 7900635 | hCG_23177       | -1.07 | down | hCG23177                                                                    |
| 7953594 | EMG1            | -1.07 | down |                                                                             |
| 8140686 | SEMA3D          | -1.07 | down | sema domain, immunoglobulin domain (Ig), short basic domain, secreted       |
| 7972217 | SPRY2           | -1.07 | down | sprouty homolog 2 ( <i>Drosophila</i> )                                     |
| 8118571 | PSMB9           | -1.07 | down | proteasome (prosome, macropain) subunit, beta type, 9 (large multifurcated) |
| 7956031 | ORMDL2          | -1.07 | down | ORM1-like 2 ( <i>S. cerevisiae</i> )                                        |
| 8179495 | PSMB9           | -1.07 | down | proteasome (prosome, macropain) subunit, beta type, 9 (large multifurcated) |
| 8138834 | FKBP14          | -1.07 | down | FK506 binding protein 14, 22 kDa                                            |
| 8178211 | PSMB9           | -1.07 | down | proteasome (prosome, macropain) subunit, beta type, 9 (large multifurcated) |
| 7922382 | ANKRD45         | -1.08 | down | ankyrin repeat domain 45                                                    |
| 7918294 | C1orf194        | -1.08 | down | chromosome 1 open reading frame 194                                         |
| 7965226 | RASSF9          | -1.08 | down | Ras association (RalGDS/AF-6) domain family (N-terminal) member 9           |
| 8157632 | C9orf18         | -1.08 | down | chromosome 9 open reading frame 18                                          |
| 8166671 | CXorf22         | -1.08 | down | chromosome X open reading frame 22                                          |
| 7916629 | C1orf87         | -1.08 | down | chromosome 1 open reading frame 87                                          |
| 8011990 | TEKT1           | -1.08 | down | tektin 1                                                                    |
| 8083839 | GPR160          | -1.08 | down | G protein-coupled receptor 160                                              |
| 8178811 | 33583 LOC10013: | -1.08 | down |                                                                             |

Supplemental Table 2c  
eSFPCOS vs. eSFCtrl

|         |                 |       |      |                                                                           |
|---------|-----------------|-------|------|---------------------------------------------------------------------------|
| 8082478 | COPG            | -1.08 | down | coatomer protein complex, subunit gamma                                   |
| 8001800 | CDH11           | -1.09 | down | cadherin 11, type 2, OB-cadherin (osteoblast)                             |
| 8111864 | C6              | -1.09 | down | complement component 6                                                    |
| 8116724 | FARS2           | -1.09 | down | phenylalanyl-tRNA synthetase 2, mitochondrial                             |
| 8166784 | TSPAN7          | -1.09 | down | tetraspanin 7                                                             |
| 8166690 | CXorf59         | -1.09 | down | chromosome X open reading frame 59                                        |
| 7966135 | CORO1C          | -1.10 | down | coronin, actin binding protein, 1C                                        |
| 8122365 | GPR126          | -1.10 | down | G protein-coupled receptor 126                                            |
| 8085145 | RAD18           | -1.10 | down |                                                                           |
| 7976488 | SERPINA5        | -1.10 | down | serpin peptidase inhibitor, clade A (alpha-1 antiproteinase, antitrypsin) |
| 7908793 | ELF3            | -1.10 | down | E74-like factor 3 (ets domain transcription factor, epithelial-specific ) |
| 7932420 | PTPLA           | -1.11 | down | protein tyrosine phosphatase-like (proline instead of catalytic arginine) |
| 8088339 | ARF4            | -1.11 | down | ADP-ribosylation factor 4                                                 |
| 8180003 | 33583 LOC10013: | -1.12 | down |                                                                           |
| 7951178 | TRPC6           | -1.12 | down | transient receptor potential cation channel, subfamily C, member 6        |
| 8092328 | MCCC1           | -1.12 | down | methylcrotonoyl-Coenzyme A carboxylase 1 (alpha)                          |
| 8054511 | LOC205251       | -1.12 | down |                                                                           |
| 7926807 | PDSS1           | -1.12 | down | prenyl (decaprenyl) diphosphate synthase, subunit 1                       |
| 8004957 | DNAH9           | -1.12 | down | dynein, axonemal, heavy chain 9                                           |
| 8100464 | NMU             | -1.13 | down | neuromedin U                                                              |
| 7925525 | CEP170          | -1.13 | down | centrosomal protein 170kDa                                                |
| 7915286 | PPT1            | -1.13 | down | palmitoyl-protein thioesterase 1 (ceroid-lipofuscinosis, neuronal 1, infa |
| 8170992 | SNORA56         | -1.14 | down | small nucleolar RNA, H/ACA box 56                                         |
| 8046428 | RAPGEF4         | -1.14 | down | Rap guanine nucleotide exchange factor (GEF) 4                            |
| 7932744 | ARMC4           | -1.14 | down | armadillo repeat containing 4                                             |
| 8090448 | RUVBL1          | -1.14 | down | RuvB-like 1 (E. coli)                                                     |
| 7989708 | MTFMT           | -1.14 | down | mitochondrial methionyl-tRNA formyltransferase                            |
| 8070603 | RSPH1           | -1.14 | down | radial spoke head 1 homolog (Chlamydomonas)                               |
| 8020898 | ZNF271          | -1.14 | down | zinc finger protein 271                                                   |
| 8160531 | C9orf72         | -1.14 | down | chromosome 9 open reading frame 72                                        |
| 8151999 | RGS22           | -1.15 | down | regulator of G-protein signaling 22                                       |
| 7976073 | FLRT2           | -1.15 | down | fibronectin leucine rich transmembrane protein 2                          |
| 8109194 | SLC26A2         | -1.15 | down | solute carrier family 26 (sulfate transporter), member 2                  |

Supplemental Table 2c  
eSFPCOS vs. eSFCtrl

|         |                  |       |      |                                                                           |
|---------|------------------|-------|------|---------------------------------------------------------------------------|
| 8050176 | ITGB1BP1         | -1.15 | down | integrin beta 1 binding protein 1                                         |
| 7980485 | DIO2             | -1.16 | down | deiodinase, iodothyronine, type II                                        |
| 8125919 | FKBP5 LOC285847  | -1.16 | down | FK506 binding protein 5   hypothetical protein LOC285847                  |
| 7952046 | MPZL2            | -1.16 | down | myelin protein zero-like 2                                                |
| 7938366 | WEE1             | -1.16 | down |                                                                           |
| 8121015 | C6orf165 SLC35A1 | -1.16 | down | chromosome 6 open reading frame 165   solute carrier family 35 (CMP       |
| 8017843 | SLC16A6          | -1.16 | down | solute carrier family 16, member 6 (monocarboxylic acid transporter 7)    |
| 8083779 | SERPINI1         | -1.16 | down | serpin peptidase inhibitor, clade I (neuroserpin), member 1               |
| 8054479 | MALL             | -1.17 | down | mal, T-cell differentiation protein-like                                  |
| 8146957 | PI15             | -1.17 | down | peptidase inhibitor 15                                                    |
| 8096415 | MMRN1            | -1.17 | down | multimerin 1                                                              |
| 8172204 | MAOB             | -1.17 | down | monoamine oxidase B                                                       |
| 8022902 | C18orf37         | -1.17 | down | chromosome 18 open reading frame 37                                       |
| 8078544 | MLH1             | -1.17 | down | mutL homolog 1, colon cancer, nonpolyposis type 2 (E. coli)               |
| 8129573 | MOXD1            | -1.17 | down | monooxygenase, DBH-like 1                                                 |
| 8096301 | SPP1             | -1.18 | down | secreted phosphoprotein 1 (osteopontin, bone sialoprotein I, early T-ly   |
| 8091243 | PCOLCE2          | -1.18 | down | procollagen C-endopeptidase enhancer 2                                    |
| 8059376 | SERPINE2         | -1.18 | down | serpin peptidase inhibitor, clade E (nexin, plasminogen activator inhibit |
| 7931187 | BUB3             | -1.18 | down |                                                                           |
| 8007397 | PSME3            | -1.19 | down | proteasome (prosome, macropain) activator subunit 3 (PA28 gamma; k        |
| 8021301 | RAB27B           | -1.19 | down |                                                                           |
| 8116859 | TMEM14C          | -1.19 | down | transmembrane protein 14C                                                 |
| 7929438 | HELLS            | -1.19 | down | helicase, lymphoid-specific                                               |
| 8178802 | 33583 LOC10013:  | -1.20 | down |                                                                           |
| 7949588 | CD248            | -1.20 | down |                                                                           |
| 7901048 | SNORD46          | -1.20 | down | small nucleolar RNA, C/D box 46                                           |
| 7977615 | RNASE1           | -1.21 | down | ribonuclease, RNase A family, 1 (pancreatic)                              |
| 7932598 | C10orf63         | -1.21 | down | chromosome 10 open reading frame 63                                       |
| 8098556 | CCDC111          | -1.21 | down | coiled-coil domain containing 111                                         |
| 7976443 | IFI27            | -1.21 | down | interferon, alpha-inducible protein 27                                    |
| 8096744 | CYP2U1           | -1.21 | down | cytochrome P450, family 2, subfamily U, polypeptide 1                     |
| 8170635 | ZNF275           | -1.21 | down | zinc finger protein 275                                                   |
| 8150691 | EFCAB1           | -1.22 | down | EF-hand calcium binding domain 1                                          |

Supplemental Table 2c  
eSFPCOS vs. eSFCtrl

|         |                 |       |      |                                                                               |
|---------|-----------------|-------|------|-------------------------------------------------------------------------------|
| 8157691 | LOC729012       | -1.22 | down | similar to Spindle and kinetochore-associated protein 2 (Protein FAM3C)       |
| 8105596 | RGS7BP          | -1.22 | down | regulator of G-protein signaling 7 binding protein                            |
| 8112967 | TMEM167         | -1.22 | down | transmembrane protein 167                                                     |
| 8175177 | MBNL3           | -1.22 | down | muscleblind-like 3 (Drosophila)                                               |
| 7916570 | OMA1 DAB1       | -1.23 | down | OMA1 homolog, zinc metallopeptidase ( <i>S. cerevisiae</i> )   disabled homol |
| 7930714 | ATRNL1          | -1.23 | down | attractin-like 1                                                              |
| 7996198 | CCDC113         | -1.23 | down | coiled-coil domain containing 113                                             |
| 8096771 | DC2             | -1.24 | down |                                                                               |
| 7965410 | DCN             | -1.24 | down | decorin                                                                       |
| 8167006 | RP2             | -1.25 | down | retinitis pigmentosa 2 (X-linked recessive)                                   |
| 8041383 | LTBP1           | -1.25 | down | latent transforming growth factor beta binding protein 1                      |
| 8131803 | IL6             | -1.25 | down | interleukin 6 (interferon, beta 2)                                            |
| 7909789 | TGFB2           | -1.25 | down | transforming growth factor, beta 2                                            |
| 7986394 | LRRC28          | -1.25 | down | leucine rich repeat containing 28                                             |
| 8098204 | CPE             | -1.26 | down | carboxypeptidase E                                                            |
| 8176962 | VAMP7           | -1.26 | down | vesicle-associated membrane protein 7                                         |
| 8171041 | VAMP7           | -1.27 | down | vesicle-associated membrane protein 7                                         |
| 7935776 | PRO1933         | -1.27 | down |                                                                               |
| 8126135 | GLO1            | -1.27 | down | glyoxalase I                                                                  |
| 7964466 | DCTN2           | -1.27 | down | dynactin 2 (p50)                                                              |
| 8096538 | RAP1GDS1        | -1.28 | down | RAP1, GTP-GDP dissociation stimulator 1                                       |
| 8141843 | OC100133005 LOC | -1.28 | down | hypothetical protein FLJ21767   similar to RAS p21 protein activator 4        |
| 8155747 | C9orf135        | -1.28 | down | chromosome 9 open reading frame 135                                           |
| 8122144 | SNORA33         | -1.28 | down | small nucleolar RNA, H/ACA box 33                                             |
| 8127637 | TMEM30A         | -1.29 | down | transmembrane protein 30A                                                     |
| 7912537 | DHRS3           | -1.29 | down | dehydrogenase/reductase (SDR family) member 3                                 |
| 8058765 | FN1             | -1.30 | down | fibronectin 1                                                                 |
| 8081867 | C3orf1          | -1.31 | down | chromosome 3 open reading frame 1                                             |
| 7922268 | KIFAP3          | -1.31 | down | kinesin-associated protein 3                                                  |
| 8071737 | MIF             | -1.32 | down | macrophage migration inhibitory factor (glycosylation-inhibiting factor)      |
| 8099807 | GAFA3           | -1.32 | down | FGF-2 activity-associated protein 3                                           |
| 8068612 | WRB             | -1.32 | down | tryptophan rich basic protein                                                 |
| 8107850 | CHSY3           | -1.32 | down | chondroitin sulfate synthase 3                                                |

Supplemental Table 2c  
eSFPCOS vs. eSFCtrl

|         |              |       |      |                                                                        |
|---------|--------------|-------|------|------------------------------------------------------------------------|
| 8058462 | MDH1B        | -1.33 | down | malate dehydrogenase 1B, NAD (soluble)                                 |
| 8001410 | AKTIP        | -1.33 | down | AKT interacting protein                                                |
| 8171248 | KAL1         | -1.33 | down | Kallmann syndrome 1 sequence                                           |
| 8148070 | COL14A1      | -1.34 | down | collagen, type XIV, alpha 1                                            |
| 8135235 | PMPCB        | -1.34 | down | peptidase (mitochondrial processing) beta                              |
| 7944082 | TAGLN        | -1.34 | down | transgelin                                                             |
| 8083968 | NLGN1        | -1.34 | down | neuroligin 1                                                           |
| 7914218 | TAF12        | -1.35 | down |                                                                        |
| 8042788 | ACTG2        | -1.35 | down | actin, gamma 2, smooth muscle, enteric                                 |
| 8140840 | STEAP4       | -1.35 | down | STEAP family member 4                                                  |
| 8135585 | LOC100128868 | -1.37 | down | testin-related protein TRG                                             |
| 8166140 | MOSPD2       | -1.38 | down | motile sperm domain containing 2                                       |
| 7950810 | SYTL2        | -1.40 | down | synaptotagmin-like 2                                                   |
| 7974229 | KLHDC2       | -1.40 | down | kelch domain containing 2                                              |
| 8175288 | MOSPD1       | -1.41 | down | motile sperm domain containing 1                                       |
| 8120239 | TMEM14A      | -1.41 | down | transmembrane protein 14A                                              |
| 7903214 | LPPR4        | -1.42 | down | plasticity related gene 1                                              |
| 7961514 | MGP          | -1.44 | down | matrix Gla protein                                                     |
| 8122705 | PCMT1        | -1.45 | down | protein-L-isoaspartate (D-aspartate) O-methyltransferase               |
| 7970467 | N6AMT2       | -1.45 | down | N-6 adenine-specific DNA methyltransferase 2 (putative)                |
| 8162880 | MRPL50       | -1.46 | down | mitochondrial ribosomal protein L50                                    |
| 8055862 | ARL5A        | -1.46 | down | ADP-ribosylation factor-like 5A                                        |
| 7971541 | SUCLA2       | -1.47 | down | succinate-CoA ligase, ADP-forming, beta subunit                        |
| 8105348 | LOC493869    | -1.47 | down | similar to RIKEN cDNA 2310016C16                                       |
| 8077323 | CNTN4        | -1.48 | down | contactin 4                                                            |
| 7953291 | CD9          | -1.49 | down |                                                                        |
| 8108217 | TGFBI        | -1.50 | down | transforming growth factor, beta-induced, 68kDa                        |
| 7938364 | WEE1         | -1.50 | down |                                                                        |
| 8156905 | TMEFF1       | -1.51 | down | transmembrane protein with EGF-like and two follistatin-like domains : |
| 8042495 | RY1          | -1.52 | down | putative nucleic acid binding protein RY-1                             |
| 8165642 | TMEM203      | -1.54 | down | transmembrane protein 203                                              |
| 8171802 | ACOT9        | -1.54 | down | acyl-CoA thioesterase 9                                                |
| 7954293 | PDE3A        | -1.54 | down | phosphodiesterase 3A, cGMP-inhibited                                   |

Supplemental Table 2c  
eSFPCOS vs. eSFCtrl

|         |                |       |      |                                                                     |
|---------|----------------|-------|------|---------------------------------------------------------------------|
| 8179055 | ZNRD1          | -1.55 | down | zinc ribbon domain containing 1                                     |
| 8023191 | SMAD2          | -1.56 | down | SMAD family member 2                                                |
| 8015349 | KRT19          | -1.56 | down | keratin 19                                                          |
| 7971077 | POSTN          | -1.56 | down | periostin, osteoblast specific factor                               |
| 8073334 | RBX1           | -1.59 | down | ring-box 1                                                          |
| 8006812 | PSMB3          | -1.61 | down | proteasome (prosome, macropain) subunit, beta type, 3               |
| 8041561 | MORN2          | -1.65 | down | MORN repeat containing 2                                            |
| 8097692 | EDNRA          | -1.66 | down | endothelin receptor type A                                          |
| 8149551 | PSD3           | -1.67 | down | pleckstrin and Sec7 domain containing 3                             |
| 8127201 | COL21A1        | -1.67 | down | collagen, type XXI, alpha 1                                         |
| 8097679 | LSM6           | -1.69 | down |                                                                     |
| 8152340 | NUDCD1         | -1.73 | down | NudC domain containing 1                                            |
| 8088979 | VGLL3          | -1.83 | down | vestigial like 3 (Drosophila)                                       |
| 7962058 | TMTC1          | -1.84 | down | transmembrane and tetratricopeptide repeat containing 1             |
| 7917037 | CRYZ           | -1.93 | down | crystallin, zeta (quinone reductase)                                |
| 8162373 | OGN            | -1.97 | down | osteoglycin                                                         |
| 8092265 | MRPL47         | -1.97 | down | mitochondrial ribosomal protein L47                                 |
| 8054580 | BUB1           | -2.00 | down |                                                                     |
| 8105828 | CCNB1          | -2.01 | down | cyclin B1                                                           |
| 8127563 | COL12A1        | -2.02 | down | collagen, type XII, alpha 1                                         |
| 8135218 | LRRC17         | -2.03 | down | leucine rich repeat containing 17                                   |
| 7970513 | C13orf3        | -2.03 | down | chromosome 13 open reading frame 3                                  |
| 7958031 | C12orf48       | -2.04 | down | chromosome 12 open reading frame 48                                 |
| 8093096 | CTEX1D2 TM4SF1 | -2.04 | down | Tctex1 domain containing 2   transmembrane 4 L six family member 15 |
| 7968789 | C13orf15       | -2.04 | down | chromosome 13 open reading frame 15                                 |
| 7965855 | NUP37          | -2.04 | down | nucleoporin 37kDa                                                   |
| 8125775 | C6orf125       | -2.05 | down | chromosome 6 open reading frame 125                                 |
| 7916898 | DEPDC1         | -2.07 | down | DEP domain containing 1                                             |
| 8147516 | MATN2          | -2.09 | down | matrilin 2                                                          |
| 8120961 | C6orf117       | -2.09 | down | chromosome 6 open reading frame 117                                 |
| 8135587 | CAV2           | -2.12 | down | caveolin 2                                                          |
| 7947248 | KIF18A         | -2.12 | down | kinesin family member 18A                                           |
| 8155849 | ANXA1          | -2.12 | down | annexin A1                                                          |



Supplemental Table 2c  
eSFPCOS vs. eSFCtrl

|         |                |       |      |                                                                          |
|---------|----------------|-------|------|--------------------------------------------------------------------------|
| 8055702 | NMI            | -2.12 | down | N-myc (and STAT) interactor                                              |
| 7951662 | CRYAB          | -2.13 | down | crystallin, alpha B                                                      |
| 7981960 | NRPN SNORD116- | -2.15 | down | small nuclear ribonucleoprotein polypeptide N   small nucleolar RNA, C   |
| 7917516 | GBP1 LOC400759 | -2.16 | down | guanylate binding protein 1, interferon-inducible, 67kDa   interferon-ir |
| 8134257 | GNG11          | -2.16 | down | guanine nucleotide binding protein (G protein), gamma 11                 |
| 8174189 | TMSL8 MGC3990C | -2.17 | down | thymosin-like 8   thymosin beta15b                                       |
| 7935180 | PDLIM1         | -2.17 | down | PDZ and LIM domain 1 (elfin)                                             |
| 8097628 | HHIP           | -2.21 | down | hedgehog interacting protein                                             |
| 8169541 | DOCK11         | -2.23 | down | dedicator of cytokinesis 11                                              |
| 8168146 | KIF4A          | -2.24 | down | kinesin family member 4A                                                 |
| 8147273 | 26A7 LOC100130 | -2.25 | down | solute carrier family 26, member 7   similar to hCG2008599               |
| 7981951 | NRPN SNORD116- | -2.25 | down | small nuclear ribonucleoprotein polypeptide N   small nucleolar RNA, C   |
| 8155214 | MELK           | -2.25 | down | maternal embryonic leucine zipper kinase                                 |
| 8045688 | TNFAIP6        | -2.25 | down | tumor necrosis factor, alpha-induced protein 6                           |
| 8102643 | CCNA2          | -2.27 | down | cyclin A2                                                                |
| 8122554 | RAB32          | -2.30 | down |                                                                          |
| 7953218 | RAD51AP1       | -2.30 | down | RAD51 associated protein 1                                               |
| 8019842 | TYMS           | -2.34 | down | thymidylate synthetase                                                   |
| 8121916 | RSPO3          | -2.35 | down | R-spondin 3 homolog (Xenopus laevis)                                     |
| 8073192 | UQCRCFS1       | -2.36 | down | ubiquinol-cytochrome c reductase, Rieske iron-sulfur polypeptide 1       |
| 7936673 | RGS10          | -2.37 | down | regulator of G-protein signaling 10                                      |
| 8079237 | KIF15          | -2.40 | down | kinesin family member 15                                                 |
| 7951408 | COP1           | -2.41 | down | caspase-1 dominant-negative inhibitor pseudo-ICE                         |
| 8061579 | TPX2           | -2.43 | down |                                                                          |
| 8102560 | MAD2L1         | -2.44 | down | MAD2 mitotic arrest deficient-like 1 (yeast)                             |
| 7902808 | HS2ST1         | -2.44 | down | heparan sulfate 2-O-sulfotransferase 1                                   |
| 7971866 | DIAPH3         | -2.45 | down | diaphanous homolog 3 (Drosophila)                                        |
| 8112980 | EDIL3          | -2.50 | down | EGF-like repeats and discoidin I-like domains 3                          |
| 8120838 | TTK            | -2.54 | down |                                                                          |
| 8069689 | ADAMTS5        | -2.56 | down | ADAM metallopeptidase with thrombospondin type 1 motif, 5 (aggreca       |
| 7958253 | OCC-1          | -2.57 | down | overexpressed in colon carcinoma-1                                       |
| 8052355 | EFEMP1         | -2.59 | down | EGF-containing fibulin-like extracellular matrix protein 1               |
| 8108301 | KIF20A         | -2.61 | down | kinesin family member 20A                                                |

Supplemental Table 2c  
eSFPCOS vs. eSFCtrl

|         |                  |       |      |                                                                          |
|---------|------------------|-------|------|--------------------------------------------------------------------------|
| 8109712 | HMMR             | -2.61 | down | hyaluronan-mediated motility receptor (RHAMM)                            |
| 7982757 | CASC5            | -2.66 | down | cancer susceptibility candidate 5                                        |
| 8132318 | ANLN             | -2.69 | down | anillin, actin binding protein                                           |
| 8151032 | GGH              | -2.72 | down | gamma-glutamyl hydrolase (conjugase, foylpolypolyglutamyl hydro          |
| 7937020 | MKI67            | -2.73 | down | antigen identified by monoclonal antibody Ki-67                          |
| 7929334 | CEP55            | -2.75 | down | centrosomal protein 55kDa                                                |
| 7982358 | ARHGAP11A        | -2.83 | down | Rho GTPase activating protein 11A                                        |
| 7906930 | NUF2             | -2.95 | down |                                                                          |
| 8121911 | C6orf173         | -2.97 | down | chromosome 6 open reading frame 173                                      |
| 7923086 | ASPM             | -3.02 | down | asp (abnormal spindle) homolog, microcephaly associated (Drosophila)     |
| 7929258 | KIF11            | -3.03 | down | kinesin family member 11                                                 |
| 8097857 | MND1             | -3.04 | down | meiotic nuclear divisions 1 homolog (S. cerevisiae)                      |
| 7923426 | UBE2T            | -3.06 | down | ubiquitin-conjugating enzyme E2T (putative)                              |
| 7927710 | CDC2             | -3.07 | down | cell division cycle 2, G1 to S and G2 to M                               |
| 8019857 | NDC80            | -3.07 | down |                                                                          |
| 8014974 | TOP2A            | -3.11 | down | topoisomerase (DNA) II alpha 170kDa                                      |
| 7984540 | KIF23            | -3.15 | down | kinesin family member 23                                                 |
| 8149955 | PBK              | -3.36 | down | PDZ binding kinase                                                       |
| 7979307 | DLG7             | -3.48 | down | discs, large homolog 7 (Drosophila)                                      |
| 8161455 | iF7P2 LOC100132' | -3.60 | down | keratinocyte growth factor-like protein 2   keratinocyte growth factor-l |
| 8155487 | iF7P2 LOC100132' | -3.61 | down | keratinocyte growth factor-like protein 1   keratinocyte growth factor-l |
| 8161423 | iF7P2 LOC100132' | -3.65 | down | keratinocyte growth factor-like protein 2   keratinocyte growth factor-l |
| 7983630 | FGF7             | -3.74 | down | fibroblast growth factor 7 (keratinocyte growth factor)                  |
| 8067839 | 0132771 LOC1001  | -3.97 | down | fibroblast growth factor 7 pseudogene 2   similar to keratinocyte grow   |
| 7989647 | KIAA0101         | -4.11 | down |                                                                          |

Supplemental Table 2d  
eMSCPCOS vs. eMSCCtrl

| Transcripts Cluster Id | Genesymbol        | eMSCPCOS vs. eMSCCtrl | Regulation | Genedescription                                          |
|------------------------|-------------------|-----------------------|------------|----------------------------------------------------------|
| 7905548                | SPRR3             | 6.65                  | up         | small proline-rich protein 3                             |
| 8158167                | LCN2              | 5.06                  | up         | lipocalin 2                                              |
| 8037053                | CEACAM7           | 3.62                  | up         | carcinoembryonic antigen-related cell adhesion molecule  |
| 7951593                | FLJ45803          | 3.19                  | up         |                                                          |
| 8019802                | RNU2 RNU2B WDR74  | 2.60                  | up         | RNA, U2 small nuclear   RNA, U2B small nuclear   WD re   |
| 8177931                | C6orf205          | 2.55                  | up         | chromosome 6 open reading frame 205                      |
| 8019641                | RNU2 RNU2B WDR74  | 2.55                  | up         | RNA, U2 small nuclear   RNA, U2B small nuclear   WD re   |
| 8019639                | RNU2 RNU2B WDR74  | 2.55                  | up         | RNA, U2 small nuclear   RNA, U2B small nuclear   WD re   |
| 8019707                | RNU2 RNU2B WDR74  | 2.55                  | up         | RNA, U2 small nuclear   RNA, U2B small nuclear   WD re   |
| 8019705                | RNU2 RNU2B WDR74  | 2.55                  | up         | RNA, U2 small nuclear   RNA, U2B small nuclear   WD re   |
| 8019703                | RNU2 RNU2B WDR74  | 2.55                  | up         | RNA, U2 small nuclear   RNA, U2B small nuclear   WD re   |
| 8019631                | RNU2 RNU2B WDR74  | 2.55                  | up         | RNA, U2 small nuclear   RNA, U2B small nuclear   WD re   |
| 8019635                | RNU2 RNU2B WDR74  | 2.55                  | up         | RNA, U2 small nuclear   RNA, U2B small nuclear   WD re   |
| 8019637                | RNU2 RNU2B WDR74  | 2.55                  | up         | RNA, U2 small nuclear   RNA, U2B small nuclear   WD re   |
| 8019633                | RNU2 RNU2B WDR74  | 2.55                  | up         | RNA, U2 small nuclear   RNA, U2B small nuclear   WD re   |
| 8019709                | RNU2 RNU2B WDR74  | 2.53                  | up         | RNA, U2 small nuclear   RNA, U2B small nuclear   WD re   |
| 8015323                | KRT13 GUCA1B      | 2.47                  | up         | keratin 13   guanylate cyclase activator 1B (retina)     |
| 8118069                | C6orf205          | 2.47                  | up         | chromosome 6 open reading frame 205                      |
| 8066528                | PIGT              | 2.35                  | up         | phosphatidylinositol glycan anchor biosynthesis, class T |
| 8179224                | C6orf205          | 2.34                  | up         | chromosome 6 open reading frame 205                      |
| 8014956                | NR1D1 THRA        | 2.33                  | up         | nuclear receptor subfamily 1, group D, member 1   thyr   |
| 7943530                | GRIA4             | 2.26                  | up         | glutamate receptor, ionotropic, AMPA 4                   |
| 8043504                | MAL               | 2.26                  | up         | mal, T-cell differentiation protein                      |
| 7998722                | SNORD60           | 2.25                  | up         | small nucleolar RNA, C/D box 60                          |
| 8095680                | IL8               | 2.24                  | up         | interleukin 8                                            |
| 7983478                | C15orf48          | 2.24                  | up         | chromosome 15 open reading frame 48                      |
| 8055911                | LOC100129449      | 2.11                  | up         | PRO2055                                                  |
| 7939314                | EHF               | 2.08                  | up         | ets homologous factor                                    |
| 8059708                | SNORA75           | 2.04                  | up         | small nucleolar RNA, H/ACA box 75                        |
| 8005204                | 144A CCDC144B CCD | 2.03                  | up         | coiled-coil domain containing 144A   coiled-coil domain  |
| 7972826                | C13orf29          | 2.03                  | up         | chromosome 13 open reading frame 29                      |
| 8025601                | ICAM1             | 2.00                  | up         | intercellular adhesion molecule 1 (CD54), human rhinovi  |

Supplemental Table 2d  
eMSCPCOS vs. eMSCCtrl

|         |                     |      |    |                                                            |
|---------|---------------------|------|----|------------------------------------------------------------|
| 8013272 | 144A CCDC144B CCD   | 1.99 | up | coiled-coil domain containing 144A   coiled-coil domain    |
| 8102800 | SLC7A11             | 1.93 | up | solute carrier family 7, (cationic amino acid transporter, |
| 8170990 | SNORA36A            | 1.88 | up | small nucleolar RNA, H/ACA box 36A                         |
| 8092169 | TNFSF10             | 1.78 | up | tumor necrosis factor (ligand) superfamily, member 10      |
| 8148040 | MAL2                | 1.77 | up | mal, T-cell differentiation protein 2                      |
| 8015349 | KRT19               | 1.77 | up | keratin 19                                                 |
| 8122265 | TNFAIP3             | 1.74 | up | tumor necrosis factor, alpha-induced protein 3             |
| 8000636 | 00132247 DKFZp547E  | 1.71 | up | similar to nuclear pore complex interacting protein   KIA  |
| 7908793 | ELF3                | 1.67 | up | E74-like factor 3 (ets domain transcription factor, epithe |
| 7986509 | LOC441734           | 1.63 | up | similar to hypothetical protein DKFZp434I1020              |
| 7986527 | C15orf51            | 1.63 | up | chromosome 15 open reading frame 51                        |
| 8116983 | CD83                | 1.59 | up |                                                            |
| 7957140 | LGR5                | 1.57 | up | leucine-rich repeat-containing G protein-coupled recept    |
| 7948904 | SNORD28             | 1.54 | up | small nucleolar RNA, C/D box 28                            |
| 8008588 | HLF                 | 1.53 | up | hepatic leukemia factor                                    |
| 8160912 | C9orf131            | 1.52 | up | chromosome 9 open reading frame 131                        |
| 8155849 | ANXA1               | 1.51 | up | annexin A1                                                 |
| 8042144 | REL                 | 1.49 | up | v-rel reticuloendotheliosis viral oncogene homolog (avian  |
| 8152522 | ENPP2               | 1.48 | up | ectonucleotide pyrophosphatase/phosphodiesterase 2 (;      |
| 8100378 | LOC402176           | 1.46 | up | similar to 60S ribosomal protein L21                       |
| 8028652 | ZFP36               | 1.46 | up | zinc finger protein 36, C3H type, homolog (mouse)          |
| 8131803 | IL6                 | 1.44 | up | interleukin 6 (interferon, beta 2)                         |
| 8140650 | SEMA3E              | 1.43 | up | sema domain, immunoglobulin domain (Ig), short basic c     |
| 8123744 | F13A1               | 1.42 | up | coagulation factor XIII, A1 polypeptide                    |
| 7939237 | C11orf41            | 1.41 | up | chromosome 11 open reading frame 41                        |
| 8157450 | ORM2                | 1.41 | up | orosomuroid 2                                              |
| 8161375 | LOC100129030 LOC511 | 1.39 | up | hypothetical protein LOC100129030   melanoma antigen       |
| 8030128 | PPP1R15A            | 1.39 | up | protein phosphatase 1, regulatory (inhibitor) subunit 15/  |
| 8155453 | LOC100129030 LOC511 | 1.39 | up | hypothetical protein LOC100129030   melanoma antigen       |
| 8147132 | CA2                 | 1.38 | up | carbonic anhydrase II                                      |
| 7905079 | ST2H2AA3 HIST2H2A   | 1.38 | up | histone cluster 2, H2aa3   histone cluster 2, H2aa4        |
| 7952339 | LOC85389            | 1.38 | up | RNA, small nucleolar                                       |
| 7919619 | AA3 HIST2H2AA4 HIS  | 1.38 | up | histone cluster 2, H2aa3   histone cluster 2, H2aa4   hist |

Supplemental Table 2d  
eMSCPCOS vs. eMSCCtrl

|         |                     |      |    |                                                              |
|---------|---------------------|------|----|--------------------------------------------------------------|
| 8112274 | ELOVL7              | 1.36 | up | ELOVL family member 7, elongation of long chain fatty a      |
| 8133360 | CLDN4               | 1.36 | up | claudin 4                                                    |
| 8092578 | ETV5                | 1.35 | up | ets variant gene 5 (ets-related molecule)                    |
| 7922418 | SNORD74             | 1.35 | up | small nucleolar RNA, C/D box 74                              |
| 8159006 | RPL7A SNORD36B      | 1.34 | up | ribosomal protein L7a   small nucleolar RNA, C/D box 36      |
| 8116921 | EDN1                | 1.34 | up | endothelin 1                                                 |
| 8017597 | hCG_1793136         | 1.32 | up | similar to ribosomal protein L31                             |
| 8124650 | UBD GABBR1          | 1.31 | up | ubiquitin D   gamma-aminobutyric acid (GABA) B recept        |
| 7969288 | OLFM4               | 1.30 | up | olfactomedin 4                                               |
| 8178295 | UBD GABBR1          | 1.28 | up | ubiquitin D   gamma-aminobutyric acid (GABA) B recept        |
| 7904478 | LOC51152 LOC1001290 | 1.27 | up | melanoma antigen   hypothetical protein LOC10012903          |
| 8017843 | SLC16A6             | 1.26 | up | solute carrier family 16, member 6 (monocarboxylic acid      |
| 7899615 | SERINC2 KIAA0746    | 1.26 | up | serine incorporator 2   KIAA0746 protein                     |
| 7981068 | SERPINA1            | 1.25 | up | serpin peptidase inhibitor, clade A (alpha-1 antiproteina    |
| 8135585 | LOC100128868        | 1.25 | up | testin-related protein TRG                                   |
| 7976443 | IFI27               | 1.24 | up | interferon, alpha-inducible protein 27                       |
| 8114010 | IRF1                | 1.24 | up | interferon regulatory factor 1                               |
| 7904562 | NBPF14 NBPF20 NBI   | 1.24 | up | neuroblastoma breakpoint family, member 16   neurobl         |
| 7920291 | S100A16             | 1.23 | up | S100 calcium binding protein A16                             |
| 7904506 | NA1245 NBPF11 NBPI  | 1.23 | up | neuroblastoma breakpoint family, member 15   neurobl         |
| 7950307 | UCP2                | 1.23 | up | uncoupling protein 2 (mitochondrial, proton carrier)         |
| 7960896 | LOC650293 OR7E125F  | 1.22 | up | seven transmembrane helix receptor   olfactory recepto       |
| 7974902 | RHOJ                | 1.22 | up | ras homolog gene family, member J                            |
| 7915472 | SLC2A1              | 1.22 | up | solute carrier family 2 (facilitated glucose transporter), n |
| 8092328 | MCCC1               | 1.22 | up | methylcrotonoyl-Coenzyme A carboxylase 1 (alpha)             |
| 8124385 | HIST1H4F HIST1H4K   | 1.21 | up | histone cluster 1, H4b   histone cluster 4, H4   histone cl  |
| 7900365 | MFSD2               | 1.21 | up | major facilitator superfamily domain containing 2            |
| 8078014 | SLC6A6              | 1.21 | up | solute carrier family 6 (neurotransmitter transporter, tau   |
| 8029693 | FOSB                | 1.21 | up | FBJ murine osteosarcoma viral oncogene homolog B             |
| 7917850 | ARHGAP29            | 1.21 | up | Rho GTPase activating protein 29                             |
| 8155591 | 20B RP11-195B21.3 C | 1.20 | up | ankyrin repeat domain 20B   hypothetical LOC644249           |
| 7971077 | POSTN               | 1.20 | up | periostin, osteoblast specific factor                        |
| 8159850 | FLJ35024            | 1.19 | up | hypothetical LOC401491                                       |

Supplemental Table 2d  
eMSCPCOS vs. eMSCCtrl

|         |                    |      |    |                                                             |
|---------|--------------------|------|----|-------------------------------------------------------------|
| 8131719 | DNAH11             | 1.19 | up | dynein, axonemal, heavy chain 11                            |
| 8091922 | WDR49              | 1.19 | up | WD repeat domain 49                                         |
| 7904874 | 'F14 NBPF20 NBPF9  | 1.19 | up | neuroblastoma breakpoint family, member 16   neurobl        |
| 7948900 | SNORD30            | 1.18 | up | small nucleolar RNA, C/D box 30                             |
| 8054479 | MALL               | 1.18 | up | mal, T-cell differentiation protein-like                    |
| 7931748 | IDI2               | 1.18 | up | isopentenyl-diphosphate delta isomerase 2                   |
| 7902738 | CLCA4              | 1.17 | up | chloride channel, calcium activated, family member 4        |
| 8173179 | RP11-278E11.2      | 1.16 | up | ubiquinol-cytochrome c reductase binding protein pseud      |
| 8053741 | ANKRD20A3 ANKRD20  | 1.16 | up | ankyrin repeat domain 20B   ankyrin repeat domain 20 f      |
| 8113591 | PGGT1B             | 1.16 | up | protein geranylgeranyltransferase type I, beta subunit      |
| 7951038 | SNORA40 JOSD3      | 1.16 | up | small nucleolar RNA, H/ACA box 40   Josephin domain co      |
| 8082012 | SLC15A2            | 1.16 | up | solute carrier family 15 (H+/peptide transporter), memb     |
| 8117372 | HIST1H2AC          | 1.16 | up | histone cluster 1, H2ac                                     |
| 8117834 | PPP1R11            | 1.15 | up | protein phosphatase 1, regulatory (inhibitor) subunit 11    |
| 8177744 | PPP1R11            | 1.15 | up | protein phosphatase 1, regulatory (inhibitor) subunit 11    |
| 8101659 | SPARCL1            | 1.14 | up | SPARC-like 1 (mast9, hevin)                                 |
| 8021301 | RAB27B             | 1.14 | up |                                                             |
| 8101322 | MOP-1              | 1.14 | up |                                                             |
| 8059576 | PID1               | 1.14 | up | phosphotyrosine interaction domain containing 1             |
| 8077366 | LRRN1              | 1.13 | up | leucine rich repeat neuronal 1                              |
| 7991386 | CIB1               | 1.12 | up | calcium and integrin binding 1 (calmyrin)                   |
| 8056611 | LRP2               | 1.12 | up | low density lipoprotein-related protein 2                   |
| 7981982 | 116-16 SNORD116-18 | 1.12 | up | small nuclear ribonucleoprotein polypeptide N   small nu    |
| 7981986 | 116-16 SNORD116-18 | 1.11 | up | small nuclear ribonucleoprotein polypeptide N   small nu    |
| 8108251 | NPY6R              | 1.11 | up | neuropeptide Y receptor Y6 (pseudogene)                     |
| 8117402 | HIST1H4F HIST1H4K  | 1.11 | up | histone cluster 1, H4e   histone cluster 4, H4   histone cl |
| 7967620 | DXH37 LOC100132564 | 1.11 | up | DEAH (Asp-Glu-Ala-His) box polypeptide 37   hypothetical    |
| 7948906 | SNORD27 SNHG1      | 1.10 | up | small nucleolar RNA, C/D box 27   small nucleolar RNA h     |
| 8180003 | 133583 LOC1001336  | 1.10 | up |                                                             |
| 8077270 | CHL1               | 1.10 | up | cell adhesion molecule with homology to L1CAM (close r      |
| 7985398 | FAM154B            | 1.10 | up | family with sequence similarity 154, member B               |
| 8178811 | 133583 LOC1001336  | 1.10 | up |                                                             |
| 7932453 | NEBL               | 1.09 | up | nebulin                                                     |

Supplemental Table 2d  
eMSCPCOS vs. eMSCCtrl

|         |                    |      |    |                                                                       |
|---------|--------------------|------|----|-----------------------------------------------------------------------|
| 7953594 | EMG1               | 1.09 | up |                                                                       |
| 8083743 | ARL14              | 1.09 | up | ADP-ribosylation factor-like 14                                       |
| 8001410 | AKTIP              | 1.09 | up | AKT interacting protein                                               |
| 8097857 | MND1               | 1.09 | up | meiotic nuclear divisions 1 homolog ( <i>S. cerevisiae</i> )          |
| 8117377 | HIST1H1E           | 1.09 | up | histone cluster 1, H1e                                                |
| 7931108 | DMBT1              | 1.08 | up | deleted in malignant brain tumors 1                                   |
| 8034342 | ZNF625 ZNF20       | 1.08 | up | zinc finger protein 625   zinc finger protein 20                      |
| 7933872 | EGR2               | 1.08 | up | early growth response 2 ( <i>Krox-20</i> homolog, <i>Drosophila</i> ) |
| 7930593 | C10orf81           | 1.08 | up | chromosome 10 open reading frame 81                                   |
| 8178802 | J133583 LOC1001336 | 1.07 | up |                                                                       |
| 8056963 | LOC100129455       | 1.07 | up |                                                                       |
| 8166784 | TSPAN7             | 1.07 | up | tetraspanin 7                                                         |
| 7942791 | LOC100008589 WDR8  | 1.07 | up | 28S ribosomal RNA   WD repeat domain 88                               |
| 8010243 | SYNGR2             | 1.07 | up | synaptogyrin 2                                                        |
| 7954310 | LOC100008588       | 1.07 | up | 18S ribosomal RNA                                                     |
| 8083839 | GPR160             | 1.07 | up | G protein-coupled receptor 160                                        |
| 8157446 | ORM1               | 1.07 | up | orosomucoid 1                                                         |
| 7959330 | WDR66              | 1.07 | up | WD repeat domain 66                                                   |
| 8149248 | LRLE1 LOC100127885 | 1.07 | up | liver-related low express protein 1   similar to liver-relat          |
| 8007561 | G6PC3              | 1.06 | up | glucose 6 phosphatase, catalytic, 3                                   |
| 8092165 | GHSR               | 1.06 | up | growth hormone secretagogue receptor                                  |
| 8090823 | SLCO2A1            | 1.06 | up | solute carrier organic anion transporter family, member               |
| 8169350 | LOC100134364       | 1.06 | up |                                                                       |
| 7912347 | CASZ1              | 1.06 | up | castor zinc finger 1                                                  |
| 7897966 | C1orf158           | 1.06 | up | chromosome 1 open reading frame 158                                   |
| 7940323 | MS4A8B             | 1.06 | up | membrane-spanning 4-domains, subfamily A, member 8                    |
| 7965410 | DCN                | 1.06 | up | decorin                                                               |
| 8143957 | RHEB               | 1.05 | up | Ras homolog enriched in brain                                         |
| 7922969 | PDC                | 1.05 | up | phosducin                                                             |
| 8057377 | CCDC141 LOC285026  | 1.05 | up | coiled-coil domain containing 141   hypothetical protein              |
| 8011990 | TEKT1              | 1.05 | up | tektin 1                                                              |
| 7976496 | SERPINA3           | 1.05 | up | serpin peptidase inhibitor, clade A (alpha-1 antiproteina             |
| 8097628 | HHIP               | 1.05 | up | hedgehog interacting protein                                          |

Supplemental Table 2d  
eMSCPCOS vs. eMSCCtrl

|         |                  |      |    |                                                                              |
|---------|------------------|------|----|------------------------------------------------------------------------------|
| 8115327 | SPARC            | 1.05 | up | secreted protein, acidic, cysteine-rich (osteonectin)                        |
| 7939642 | CREB3L1          | 1.05 | up | cAMP responsive element binding protein 3-like 1                             |
| 7932407 | ST8SIA6          | 1.04 | up | ST8 alpha-N-acetyl-neuraminide alpha-2,8-sialyltransferase                   |
| 8088315 | ASB14 DNAH12     | 1.04 | up | ankyrin repeat and SOCS box-containing 14   dynein, axonemal, heavy chain 12 |
| 7916629 | C1orf87          | 1.04 | up | chromosome 1 open reading frame 87                                           |
| 8111019 | DNAH5            | 1.04 | up | dynein, axonemal, heavy chain 5                                              |
| 8134339 | PEG10            | 1.04 | up | paternally expressed 10                                                      |
| 8138289 | ETV1             | 1.04 | up | ets variant gene 1                                                           |
| 8004889 | WDR16            | 1.04 | up | WD repeat domain 16                                                          |
| 8107591 | ZNF474           | 1.04 | up | zinc finger protein 474                                                      |
| 8098556 | CCDC111          | 1.04 | up | coiled-coil domain containing 111                                            |
| 8057056 | TTN              | 1.03 | up | titin                                                                        |
| 8054200 | LYG2             | 1.03 | up | lysozyme G-like 2                                                            |
| 8004957 | DNAH9            | 1.03 | up | dynein, axonemal, heavy chain 9                                              |
| 8166690 | CXorf59          | 1.03 | up | chromosome X open reading frame 59                                           |
| 8033362 | INSR             | 1.03 | up | insulin receptor                                                             |
| 8121911 | C6orf173         | 1.03 | up | chromosome 6 open reading frame 173                                          |
| 7907232 | C1orf129         | 1.03 | up | chromosome 1 open reading frame 129                                          |
| 8122365 | GPR126           | 1.03 | up | G protein-coupled receptor 126                                               |
| 8154100 | VLDLR            | 1.02 | up | very low density lipoprotein receptor                                        |
| 7901048 | SNORD46          | 1.02 | up | small nucleolar RNA, C/D box 46                                              |
| 8008040 | LRRC46           | 1.02 | up | leucine rich repeat containing 46                                            |
| 8113220 | ELL2             | 1.02 | up | elongation factor, RNA polymerase II, 2                                      |
| 8089851 | HGD LOC100132552 | 1.01 | up | homogentisate 1,2-dioxygenase (homogentisate oxidase)                        |
| 8093278 | HGD LOC100132552 | 1.01 | up | homogentisate 1,2-dioxygenase (homogentisate oxidase)                        |
| 8155747 | C9orf135         | 1.01 | up | chromosome 9 open reading frame 135                                          |
| 8080863 | FLJ44379         | 1.01 | up | similar to S-100 protein, alpha chain                                        |
| 8139087 | SFRP4            | 1.01 | up | secreted frizzled-related protein 4                                          |
| 8019831 | CLUL1            | 1.01 | up | clusterin-like 1 (retinal)                                                   |
| 8085062 | IL5RA            | 1.01 | up | interleukin 5 receptor, alpha                                                |
| 8131944 | NFE2L3           | 1.01 | up | nuclear factor (erythroid-derived 2)-like 3                                  |
| 7926545 | PLXDC2           | 1.01 | up | plexin domain containing 2                                                   |
| 7904726 | TXNIP            | 1.01 | up | thioredoxin interacting protein                                              |



Supplemental Table 2d  
eMSCPCOS vs. eMSCCtrl

|         |                    |       |      |                                                           |
|---------|--------------------|-------|------|-----------------------------------------------------------|
| 8075423 | DUSP18             | 1.00  | up   | dual specificity phosphatase 18                           |
| 7965403 | LUM                | 1.00  | up   | lumican                                                   |
| 7968789 | C13orf15           | 1.00  | up   | chromosome 13 open reading frame 15                       |
| 8058927 | TMBIM1             | 1.00  | up   | transmembrane BAX inhibitor motif containing 1            |
| 8111864 | C6                 | 1.00  | up   | complement component 6                                    |
| 8161755 | ALDH1A1            | 1.00  | up   | aldehyde dehydrogenase 1 family, member A1                |
| 8157632 | C9orf18            | -1.00 | down | chromosome 9 open reading frame 18                        |
| 7959681 | DNAH10             | -1.01 | down | dynein, axonemal, heavy chain 10                          |
| 8154892 | DNAI1              | -1.01 | down | dynein, axonemal, intermediate chain 1                    |
| 7981943 | SNRPN SNORD64 P/   | -1.01 | down | Prader-Willi/Angelman syndrome-5   small nuclear ribor    |
| 7976073 | FLRT2              | -1.01 | down | fibronectin leucine rich transmembrane protein 2          |
| 8151032 | GGH                | -1.01 | down | gamma-glutamyl hydrolase (conjugase, folylpolygamma       |
| 7961514 | MGP                | -1.01 | down | matrix Gla protein                                        |
| 8035304 | BST2               | -1.02 | down | bone marrow stromal cell antigen 2                        |
| 8092970 | APOD               | -1.02 | down | apolipoprotein D                                          |
| 8150691 | EFCAB1             | -1.02 | down | EF-hand calcium binding domain 1                          |
| 8017061 | TEX14              | -1.02 | down | testis expressed 14                                       |
| 7965226 | RASSF9             | -1.02 | down | Ras association (RalGDS/AF-6) domain family (N-termina    |
| 8176962 | VAMP7              | -1.02 | down | vesicle-associated membrane protein 7                     |
| 7968866 | C13orf30           | -1.02 | down | chromosome 13 open reading frame 30                       |
| 8171041 | VAMP7              | -1.02 | down | vesicle-associated membrane protein 7                     |
| 8147273 | LC26A7 LOC10013074 | -1.02 | down | solute carrier family 26, member 7   similar to hCG2008   |
| 8175835 | BCAP31             | -1.02 | down | B-cell receptor-associated protein 31                     |
| 7941936 | GSTP1              | -1.02 | down | glutathione S-transferase pi                              |
| 8054135 | MGAT4A             | -1.02 | down | mannosyl (alpha-1,3-)-glycoprotein beta-1,4-N-acetylglu   |
| 8179055 | ZNRD1              | -1.03 | down | zinc ribbon domain containing 1                           |
| 8141843 | LOC100133005 LOC1  | -1.03 | down | hypothetical protein FLJ21767   similar to RAS p21 prote  |
| 8170635 | ZNF275             | -1.03 | down | zinc finger protein 275                                   |
| 7903393 | S1PR1              | -1.03 | down | sphingosine-1-phosphate receptor 1                        |
| 8006779 | ARHGAP23           | -1.04 | down | Rho GTPase activating protein 23                          |
| 7915504 | ELOVL1             | -1.04 | down | elongation of very long chain fatty acids (FEN1/Elo2, SUR |
| 8157691 | LOC729012          | -1.04 | down | similar to Spindle and kinetochore-associated protein 2 ( |
| 7900635 | hCG_23177          | -1.04 | down | hCG23177                                                  |

Supplemental Table 2d  
eMSCPCOS vs. eMSCCtrl

|         |                  |       |      |                                                                    |
|---------|------------------|-------|------|--------------------------------------------------------------------|
| 8118409 | C4A C4B          | -1.04 | down | complement component 4A (Rodgers blood group)   cor                |
| 8121015 | C6orf165 SLC35A1 | -1.04 | down | chromosome 6 open reading frame 165   solute carrier f             |
| 8112967 | TMEM167          | -1.04 | down | transmembrane protein 167                                          |
| 8118455 | C4A C4B          | -1.04 | down | complement component 4A (Rodgers blood group)   cor                |
| 7903959 | C1orf88          | -1.04 | down | chromosome 1 open reading frame 88                                 |
| 8121622 | RSHL3            | -1.05 | down | radial spokehead-like 3                                            |
| 8179399 | C4A C4B          | -1.05 | down | complement component 4A (Rodgers blood group)   cor                |
| 8094533 | FLJ16686         | -1.05 | down |                                                                    |
| 8088322 | DNAH12L          | -1.05 | down | dynein, axonemal, heavy chain 12-like                              |
| 8040672 | C2orf39          | -1.05 | down | chromosome 2 open reading frame 39                                 |
| 8140686 | SEMA3D           | -1.05 | down | sema domain, immunoglobulin domain (Ig), short basic c             |
| 8139057 | ELMO1            | -1.05 | down | engulfment and cell motility 1                                     |
| 8083494 | MME              | -1.05 | down | membrane metallo-endopeptidase                                     |
| 7907135 | SFT2D2           | -1.06 | down | SFT2 domain containing 2                                           |
| 8046428 | RAPGEF4          | -1.06 | down | Rap guanine nucleotide exchange factor (GEF) 4                     |
| 7930870 | TOMM22           | -1.06 | down | translocase of outer mitochondrial membrane 22 homol               |
| 7947156 | MUC15            | -1.06 | down | mucin 15, cell surface associated                                  |
| 7932744 | ARMC4            | -1.06 | down | armadillo repeat containing 4                                      |
| 8124562 | ZNF323           | -1.06 | down | zinc finger protein 323                                            |
| 7985053 | FBXO22           | -1.06 | down | F-box protein 22                                                   |
| 8057463 | CERKL            | -1.06 | down | ceramide kinase-like                                               |
| 7939559 | TSPAN18          | -1.06 | down | tetraspanin 18                                                     |
| 8114856 | PLAC8L1          | -1.06 | down | PLAC8-like 1                                                       |
| 7904695 | SEC22B           | -1.07 | down | SEC22 vesicle trafficking protein homolog B ( <i>S. cerevisiae</i> |
| 8010978 | LOC100130876     | -1.07 | down |                                                                    |
| 8030978 | LOC91664         | -1.07 | down | hypothetical protein BC007307                                      |
| 7960865 | SLC2A3           | -1.07 | down | solute carrier family 2 (facilitated glucose transporter), n       |
| 8166671 | CXorf22          | -1.07 | down | chromosome X open reading frame 22                                 |
| 8066745 | ZNF334           | -1.07 | down | zinc finger protein 334                                            |
| 8130578 | SNORA20          | -1.07 | down | small nucleolar RNA, H/ACA box 20                                  |
| 8088299 | DNHD2            | -1.08 | down | dynein heavy chain domain 2                                        |
| 7968632 | RP11-251J8.3     | -1.08 | down | hypothetical LOC646871                                             |
| 8120679 | DDX43            | -1.08 | down | DEAD (Asp-Glu-Ala-Asp) box polypeptide 43                          |

Supplemental Table 2d  
eMSCPCOS vs. eMSCCtrl

|         |                    |       |      |                                                               |
|---------|--------------------|-------|------|---------------------------------------------------------------|
| 8010139 | SEC14L1            | -1.08 | down | SEC14-like 1 ( <i>S. cerevisiae</i> )                         |
| 8138392 | AGR3               | -1.08 | down | anterior gradient homolog 3 ( <i>Xenopus laevis</i> )         |
| 7943740 | FLJ46266           | -1.09 | down |                                                               |
| 8175288 | MOSPD1             | -1.09 | down | motile sperm domain containing 1                              |
| 7926807 | PDSS1              | -1.09 | down | prenyl (decaprenyl) diphosphate synthase, subunit 1           |
| 8151999 | RGS22              | -1.09 | down | regulator of G-protein signaling 22                           |
| 7995681 | MMP2               | -1.09 | down | matrix metalloproteinase 2 (gelatinase A, 72kDa gelatinase)   |
| 8001099 | HERC2P4            | -1.10 | down | hect domain and RLD 2 pseudogene 4                            |
| 7983630 | FGF7               | -1.10 | down | fibroblast growth factor 7 (keratinocyte growth factor)       |
| 7957673 | C12orf55 FLJ34470  | -1.10 | down | chromosome 12 open reading frame 55   hypothetical p          |
| 8090180 | MUC13              | -1.10 | down | mucin 13, cell surface associated                             |
| 8059905 | COL6A3             | -1.10 | down | collagen, type VI, alpha 3                                    |
| 7977615 | RNASE1             | -1.10 | down | ribonuclease, RNase A family, 1 (pancreatic)                  |
| 8156905 | TMEFF1             | -1.11 | down | transmembrane protein with EGF-like and two follistatin       |
| 8142646 | IQUB               | -1.11 | down | IQ motif and ubiquitin domain containing                      |
| 8179495 | PSMB9              | -1.11 | down | proteasome (prosome, macropain) subunit, beta type, 9         |
| 8063601 | C20orf85           | -1.11 | down | chromosome 20 open reading frame 85                           |
| 8118571 | PSMB9              | -1.11 | down | proteasome (prosome, macropain) subunit, beta type, 9         |
| 8178211 | PSMB9              | -1.11 | down | proteasome (prosome, macropain) subunit, beta type, 9         |
| 8146794 | DEPDC2             | -1.11 | down | DEP domain containing 2                                       |
| 8120860 | BCKDHB             | -1.12 | down | branched chain keto acid dehydrogenase E1, beta polypeptide   |
| 7981976 | SNRPN SNORD116-14  | -1.12 | down | small nuclear ribonucleoprotein polypeptide N   small nuclear |
| 8108256 | MYOT               | -1.12 | down | myotilin                                                      |
| 7953385 | GAPDH              | -1.12 | down | glyceraldehyde-3-phosphate dehydrogenase                      |
| 7952205 | MCAM               | -1.12 | down | melanoma cell adhesion molecule                               |
| 7932420 | PTPLA              | -1.12 | down | protein tyrosine phosphatase-like (proline instead of cat)    |
| 8001067 | HERC2P4            | -1.13 | down | hect domain and RLD 2 pseudogene 4                            |
| 8092265 | MRPL47             | -1.13 | down | mitochondrial ribosomal protein L47                           |
| 7935776 | PRO1933            | -1.14 | down |                                                               |
| 8055151 | 26C1B A26C1A FKSG3 | -1.14 | down | ANKRD26-like family C, member 1B   ANKRD26-like family        |
| 8126853 | C6orf138           | -1.14 | down | chromosome 6 open reading frame 138                           |
| 7932598 | C10orf63           | -1.14 | down | chromosome 10 open reading frame 63                           |
| 8108688 | PCDHB3             | -1.14 | down | protocadherin beta 3                                          |

Supplemental Table 2d  
eMSCPCOS vs. eMSCCtrl

|         |                  |       |      |                                                            |
|---------|------------------|-------|------|------------------------------------------------------------|
| 8093096 | TCTEX1D2 TM4SF19 | -1.14 | down | Tctex1 domain containing 2   transmembrane 4 L six farr    |
| 7918294 | C1orf194         | -1.14 | down | chromosome 1 open reading frame 194                        |
| 8097692 | EDNRA            | -1.15 | down | endothelin receptor type A                                 |
| 8126135 | GLO1             | -1.15 | down | glyoxalase I                                               |
| 7951408 | COP1             | -1.15 | down | caspase-1 dominant-negative inhibitor pseudo-ICE           |
| 8096744 | CYP2U1           | -1.15 | down | cytochrome P450, family 2, subfamily U, polypeptide 1      |
| 8012896 | PMP22            | -1.15 | down | peripheral myelin protein 22                               |
| 8055702 | NMI              | -1.15 | down | N-myc (and STAT) interactor                                |
| 7923991 | PLXNA2           | -1.15 | down | plexin A2                                                  |
| 8058765 | FN1              | -1.15 | down | fibronectin 1                                              |
| 7912537 | DHRS3            | -1.15 | down | dehydrogenase/reductase (SDR family) member 3              |
| 8050176 | ITGB1BP1         | -1.16 | down | integrin beta 1 binding protein 1                          |
| 8006433 | CCL2             | -1.16 | down | chemokine (C-C motif) ligand 2                             |
| 7960947 | A2M              | -1.16 | down | alpha-2-macroglobulin                                      |
| 8054511 | LOC205251        | -1.16 | down |                                                            |
| 8003667 | SERPINF1         | -1.16 | down | serpin peptidase inhibitor, clade F (alpha-2 antiplasmin,  |
| 7937020 | MKI67            | -1.16 | down | antigen identified by monoclonal antibody Ki-67            |
| 8096301 | SPP1             | -1.16 | down | secreted phosphoprotein 1 (osteopontin, bone sialoprot     |
| 8096771 | DC2              | -1.17 | down |                                                            |
| 8007397 | PSME3            | -1.17 | down | proteasome (prosome, macropain) activator subunit 3 (F     |
| 8099524 | LDB2             | -1.17 | down | LIM domain binding 2                                       |
| 7910229 | ARF1             | -1.17 | down | ADP-ribosylation factor 1                                  |
| 8085867 | NEK10            | -1.17 | down | NIMA (never in mitosis gene a)- related kinase 10          |
| 8100464 | NMU              | -1.17 | down | neuromedin U                                               |
| 8041561 | MORN2            | -1.17 | down | MORN repeat containing 2                                   |
| 7925320 | NID1             | -1.18 | down | nidogen 1                                                  |
| 7935180 | PDLIM1           | -1.18 | down | PDZ and LIM domain 1 (elfin)                               |
| 7953603 | C1S              | -1.18 | down | complement component 1, s subcomponent                     |
| 7899480 | SNORA73A         | -1.18 | down | small nucleolar RNA, H/ACA box 73A                         |
| 8046922 | COL3A1           | -1.18 | down | collagen, type III, alpha 1 (Ehlers-Danlos syndrome type I |
| 7952046 | MPZL2            | -1.18 | down | myelin protein zero-like 2                                 |
| 8134257 | GNG11            | -1.19 | down | guanine nucleotide binding protein (G protein), gamma 1    |
| 8179139 | MRPS18B          | -1.19 | down | mitochondrial ribosomal protein S18B                       |

Supplemental Table 2d  
eMSCPCOS vs. eMSCCtrl

|         |                    |       |      |                                                           |
|---------|--------------------|-------|------|-----------------------------------------------------------|
| 8055220 | A26C1A A26C1B      | -1.19 | down | ANKRD26-like family C, member 1A   ANKRD26-like fami      |
| 8177824 | MRPS18B            | -1.19 | down | mitochondrial ribosomal protein S18B                      |
| 8117955 | MRPS18B            | -1.19 | down | mitochondrial ribosomal protein S18B                      |
| 7902808 | HS2ST1             | -1.19 | down | heparan sulfate 2-O-sulfotransferase 1                    |
| 8167006 | RP2                | -1.20 | down | retinitis pigmentosa 2 (X-linked recessive)               |
| 7914218 | TAF12              | -1.20 | down |                                                           |
| 8017235 | APPBP2             | -1.20 | down | amyloid beta precursor protein (cytoplasmic tail) binding |
| 7953291 | CD9                | -1.21 | down |                                                           |
| 7965873 | IGF1               | -1.21 | down | insulin-like growth factor 1 (somatomedin C)              |
| 8178598 | CLIC1              | -1.21 | down | chloride intracellular channel 1                          |
| 8091243 | PCOLCE2            | -1.22 | down | procollagen C-endopeptidase enhancer 2                    |
| 7996198 | CCDC113            | -1.22 | down | coiled-coil domain containing 113                         |
| 7942941 | CCDC81             | -1.22 | down | coiled-coil domain containing 81                          |
| 8072876 | LGALS1             | -1.22 | down | lectin, galactoside-binding, soluble, 1 (galectin 1)      |
| 8162373 | OGN                | -1.22 | down | osteoglycin                                               |
| 7976488 | SERPINA5           | -1.22 | down | serpin peptidase inhibitor, clade A (alpha-1 antiproteina |
| 7925525 | CEP170             | -1.22 | down | centrosomal protein 170kDa                                |
| 8017057 | C17orf47           | -1.23 | down | chromosome 17 open reading frame 47                       |
| 8005955 | SNORD42A           | -1.23 | down | small nucleolar RNA, C/D box 42A                          |
| 8091887 | ZBBX               | -1.23 | down | zinc finger, B-box domain containing                      |
| 8169240 | PRPS1              | -1.23 | down | phosphoribosyl pyrophosphate synthetase 1                 |
| 8161423 | FGF7P2 LOC10013277 | -1.23 | down | keratinocyte growth factor-like protein 2   keratinocyte  |
| 8155487 | FGF7P2 LOC10013277 | -1.24 | down | keratinocyte growth factor-like protein 1   keratinocyte  |
| 8122071 | ENPP3              | -1.24 | down | ectonucleotide pyrophosphatase/phosphodiesterase 3        |
| 8160016 | RANBP6             | -1.24 | down | RAN binding protein 6                                     |
| 7929438 | HELLS              | -1.24 | down | helicase, lymphoid-specific                               |
| 8161455 | FGF7P2 LOC10013277 | -1.24 | down | keratinocyte growth factor-like protein 2   keratinocyte  |
| 8071737 | MIF                | -1.24 | down | macrophage migration inhibitory factor (glycosylation-in  |
| 8141107 | SLC25A13           | -1.25 | down | solute carrier family 25, member 13 (citrin)              |
| 7922382 | ANKRD45            | -1.25 | down | ankyrin repeat domain 45                                  |
| 7984540 | KIF23              | -1.25 | down | kinesin family member 23                                  |
| 7966135 | CORO1C             | -1.25 | down | coronin, actin binding protein, 1C                        |
| 8145470 | DPYSL2             | -1.25 | down | dihydropyrimidinase-like 2                                |

Supplemental Table 2d  
eMSCPCOS vs. eMSCCtrl

|         |                         |       |      |                                                            |
|---------|-------------------------|-------|------|------------------------------------------------------------|
| 7958031 | C12orf48                | -1.26 | down | chromosome 12 open reading frame 48                        |
| 8045587 | ACVR2A                  | -1.26 | down | activin A receptor, type IIA                               |
| 8168146 | KIF4A                   | -1.26 | down | kinesin family member 4A                                   |
| 8098204 | CPE                     | -1.26 | down | carboxypeptidase E                                         |
| 7949588 | CD248                   | -1.26 | down |                                                            |
| 8134263 | COL1A2                  | -1.27 | down | collagen, type I, alpha 2                                  |
| 8137979 | ACTB                    | -1.27 | down | actin, beta                                                |
| 7972217 | SPRY2                   | -1.27 | down | sprouty homolog 2 (Drosophila)                             |
| 7952069 | C11orf60                | -1.27 | down | chromosome 11 open reading frame 60                        |
| 8116859 | TMEM14C                 | -1.27 | down | transmembrane protein 14C                                  |
| 8120961 | C6orf117                | -1.27 | down | chromosome 6 open reading frame 117                        |
| 8042495 | RY1                     | -1.27 | down | putative nucleic acid binding protein RY-1                 |
| 7931187 | BUB3                    | -1.28 | down |                                                            |
| 7950933 | NOX4                    | -1.28 | down | NADPH oxidase 4                                            |
| 7982757 | CASC5                   | -1.28 | down | cancer susceptibility candidate 5                          |
| 8067839 | LOC100132771   LOC10013 | -1.29 | down | fibroblast growth factor 7 pseudogene 2   similar to kerat |
| 8019183 | ACTG1                   | -1.29 | down | actin, gamma 1                                             |
| 8095080 | PDGFRA                  | -1.29 | down | platelet-derived growth factor receptor, alpha polypeptide |
| 8022902 | C18orf37                | -1.29 | down | chromosome 18 open reading frame 37                        |
| 7930714 | ATRNL1                  | -1.30 | down | attractin-like 1                                           |
| 8121916 | RSPO3                   | -1.30 | down | R-spondin 3 homolog (Xenopus laevis)                       |
| 7989708 | MTFMT                   | -1.30 | down | mitochondrial methionyl-tRNA formyltransferase             |
| 8122144 | SNORA33                 | -1.31 | down | small nucleolar RNA, H/ACA box 33                          |
| 7947512 | DKFZP586H2123           | -1.32 | down | regeneration associated muscle protease                    |
| 7947248 | KIF18A                  | -1.32 | down | kinesin family member 18A                                  |
| 8081867 | C3orf1                  | -1.32 | down | chromosome 3 open reading frame 1                          |
| 7917037 | CRYZ                    | -1.32 | down | crystallin, zeta (quinone reductase)                       |
| 8040655 | SELI                    | -1.33 | down | selenoprotein I                                            |
| 8129573 | MOXD1                   | -1.33 | down | monooxygenase, DBH-like 1                                  |
| 8058857 | IGFBP5                  | -1.33 | down | insulin-like growth factor binding protein 5               |
| 8127563 | COL12A1                 | -1.33 | down | collagen, type XII, alpha 1                                |
| 8105828 | CCNB1                   | -1.33 | down | cyclin B1                                                  |
| 7922137 | NME7                    | -1.35 | down | non-metastatic cells 7, protein expressed in (nucleoside-  |

Supplemental Table 2d  
eMSCPCOS vs. eMSCCtrl

|         |                  |       |      |                                                                 |
|---------|------------------|-------|------|-----------------------------------------------------------------|
| 7981988 | SNORD116-20 SNOR | -1.35 | down | small nuclear ribonucleoprotein polypeptide N   small nu        |
| 8105596 | RGS7BP           | -1.35 | down | regulator of G-protein signaling 7 binding protein              |
| 7981427 | CKB              | -1.35 | down | creatine kinase, brain                                          |
| 8082408 | SEC61A1          | -1.35 | down | Sec61 alpha 1 subunit ( <i>S. cerevisiae</i> )                  |
| 8091511 | P2RY14           | -1.35 | down | purinergic receptor P2Y, G-protein coupled, 14                  |
| 8108301 | KIF20A           | -1.35 | down | kinesin family member 20A                                       |
| 7909789 | TGFB2            | -1.36 | down | transforming growth factor, beta 2                              |
| 7937802 | CD81             | -1.36 | down |                                                                 |
| 8061579 | TPX2             | -1.37 | down |                                                                 |
| 8014974 | TOP2A            | -1.37 | down | topoisomerase (DNA) II alpha 170kDa                             |
| 8122554 | RAB32            | -1.37 | down |                                                                 |
| 8078544 | MLH1             | -1.37 | down | mutL homolog 1, colon cancer, nonpolyposis type 2 ( <i>E. c</i> |
| 7974229 | KLHDC2           | -1.38 | down | kelch domain containing 2                                       |
| 8179174 | TUBB             | -1.38 | down | tubulin, beta                                                   |
| 8117995 | TUBB             | -1.38 | down | tubulin, beta                                                   |
| 8177858 | TUBB             | -1.38 | down | tubulin, beta                                                   |
| 7953218 | RAD51AP1         | -1.38 | down | RAD51 associated protein 1                                      |
| 8052355 | EFEMP1           | -1.38 | down | EGF-containing fibulin-like extracellular matrix protein 1      |
| 8172022 | TMEM47           | -1.39 | down | transmembrane protein 47                                        |
| 8096415 | MMRN1            | -1.39 | down | multimerin 1                                                    |
| 7938364 | WEE1             | -1.39 | down |                                                                 |
| 8001800 | CDH11            | -1.39 | down | cadherin 11, type 2, OB-cadherin (osteoblast)                   |
| 8019842 | TYMS             | -1.40 | down | thymidylate synthetase                                          |
| 8066275 | PRO0628          | -1.40 | down |                                                                 |
| 8090448 | RUVBL1           | -1.40 | down | RuvB-like 1 ( <i>E. coli</i> )                                  |
| 8160531 | C9orf72          | -1.40 | down | chromosome 9 open reading frame 72                              |
| 8147447 | PTDSS1           | -1.41 | down | phosphatidylserine synthase 1                                   |
| 7903407 | AMY2B            | -1.42 | down | amylase, alpha 2B (pancreatic)                                  |
| 7920317 | ILF2             | -1.42 | down | interleukin enhancer binding factor 2, 45kDa                    |
| 7922268 | KIFAP3           | -1.42 | down | kinesin-associated protein 3                                    |
| 8109712 | HMMR             | -1.43 | down | hyaluronan-mediated motility receptor (RHAMM)                   |
| 8081667 | SLC35A5          | -1.43 | down | solute carrier family 35, member A5                             |
| 7927710 | CDC2             | -1.43 | down | cell division cycle 2, G1 to S and G2 to M                      |

Supplemental Table 2d  
eMSCPCOS vs. eMSCCtrl

|         |                  |       |      |                                                           |
|---------|------------------|-------|------|-----------------------------------------------------------|
| 8147516 | MATN2            | -1.44 | down | matrilin 2                                                |
| 8096538 | RAP1GDS1         | -1.44 | down | RAP1, GTP-GDP dissociation stimulator 1                   |
| 8102792 | PCDH18           | -1.44 | down | protocadherin 18                                          |
| 8127637 | TMEM30A          | -1.44 | down | transmembrane protein 30A                                 |
| 7923086 | ASPM             | -1.45 | down | asp (abnormal spindle) homolog, microcephaly associate    |
| 8068612 | WRB              | -1.45 | down | tryptophan rich basic protein                             |
| 8174189 | TMSL8   MGC39900 | -1.46 | down | thymosin-like 8   thymosin beta15b                        |
| 8109194 | SLC26A2          | -1.47 | down | solute carrier family 26 (sulfate transporter), member 2  |
| 8054580 | BUB1             | -1.47 | down |                                                           |
| 8052762 | GFPT1            | -1.48 | down | glutamine-fructose-6-phosphate transaminase 1             |
| 8097679 | LSM6             | -1.48 | down |                                                           |
| 7977270 | LOC388022        | -1.48 | down | hypothetical gene supported by AK131040                   |
| 8155214 | MELK             | -1.49 | down | maternal embryonic leucine zipper kinase                  |
| 7944991 | STT3A            | -1.49 | down | STT3, subunit of the oligosaccharyltransferase complex, l |
| 8073334 | RBX1             | -1.49 | down | ring-box 1                                                |
| 8055862 | ARL5A            | -1.49 | down | ADP-ribosylation factor-like 5A                           |
| 8059376 | SERPINE2         | -1.49 | down | serpin peptidase inhibitor, clade E (nexin, plasminogen a |
| 8073192 | UQCRFS1          | -1.50 | down | ubiquinol-cytochrome c reductase, Rieske iron-sulfur pol  |
| 8058462 | MDH1B            | -1.50 | down | malate dehydrogenase 1B, NAD (soluble)                    |
| 8156538 | HIATL1           | -1.50 | down | hippocampus abundant transcript-like 1                    |
| 7903119 | ABCD3            | -1.50 | down | ATP-binding cassette, sub-family D (ALD), member 3        |
| 7916898 | DEPDC1           | -1.50 | down | DEP domain containing 1                                   |
| 8010078 | SNORD1C          | -1.51 | down | small nucleolar RNA, C/D box 1C                           |
| 8166140 | MOSPD2           | -1.51 | down | motile sperm domain containing 2                          |
| 7946579 | LYVE1            | -1.51 | down | lymphatic vessel endothelial hyaluronan receptor 1        |
| 8135235 | PMPCB            | -1.52 | down | peptidase (mitochondrial processing) beta                 |
| 8001496 | NUDT21           | -1.52 | down | nudix (nucleoside diphosphate linked moiety X)-type mo    |
| 8135341 | FLJ23834         | -1.52 | down |                                                           |
| 8135218 | LRRC17           | -1.52 | down | leucine rich repeat containing 17                         |
| 8070603 | RSPH1            | -1.52 | down | radial spoke head 1 homolog (Chlamydomonas)               |
| 7951662 | CRYAB            | -1.54 | down | crystallin, alpha B                                       |
| 7906930 | NUF2             | -1.54 | down |                                                           |
| 7964466 | DCTN2            | -1.55 | down | dynactin 2 (p50)                                          |



Supplemental Table 2d  
eMSCPCOS vs. eMSCCtrl

|         |                |       |      |                                                            |
|---------|----------------|-------|------|------------------------------------------------------------|
| 7988467 | FBN1           | -1.55 | down | fibrillin 1                                                |
| 7982358 | ARHGAP11A      | -1.55 | down | Rho GTPase activating protein 11A                          |
| 8088339 | ARF4           | -1.57 | down | ADP-ribosylation factor 4                                  |
| 8120838 | TTK            | -1.57 | down |                                                            |
| 7936673 | RGS10          | -1.57 | down | regulator of G-protein signaling 10                        |
| 8135587 | CAV2           | -1.58 | down | caveolin 2                                                 |
| 7938366 | WEE1           | -1.59 | down |                                                            |
| 8132318 | ANLN           | -1.59 | down | anillin, actin binding protein                             |
| 8120239 | TMEM14A        | -1.61 | down | transmembrane protein 14A                                  |
| 8079237 | KIF15          | -1.61 | down | kinesin family member 15                                   |
| 7956031 | ORMDL2         | -1.61 | down | ORM1-like 2 ( <i>S. cerevisiae</i> )                       |
| 8069689 | ADAMTS5        | -1.61 | down | ADAM metalloproteinase with thrombospondin type 1 m        |
| 8152340 | NUDCD1         | -1.61 | down | NudC domain containing 1                                   |
| 7929258 | KIF11          | -1.63 | down | kinesin family member 11                                   |
| 8122705 | PCMT1          | -1.64 | down | protein-L-isoaspartate (D-aspartate) O-methyltransferase   |
| 7948995 | ATL3           | -1.65 | down | atlastin 3                                                 |
| 7971866 | DIAPH3         | -1.65 | down | diaphanous homolog 3 ( <i>Drosophila</i> )                 |
| 8082478 | COPG           | -1.66 | down | coatamer protein complex, subunit gamma                    |
| 7921862 | C1orf192       | -1.68 | down | chromosome 1 open reading frame 192                        |
| 7970513 | C13orf3        | -1.68 | down | chromosome 13 open reading frame 3                         |
| 7979307 | DLG7           | -1.69 | down | discs, large homolog 7 ( <i>Drosophila</i> )               |
| 7920337 | INTS3          | -1.70 | down | integrator complex subunit 3                               |
| 7980485 | DIO2           | -1.71 | down | deiodinase, iodothyronine, type II                         |
| 8162880 | MRPL50         | -1.72 | down | mitochondrial ribosomal protein L50                        |
| 7917516 | GBP1 LOC400759 | -1.72 | down | guanylate binding protein 1, interferon-inducible, 67kDa   |
| 8148070 | COL14A1        | -1.73 | down | collagen, type XIV, alpha 1                                |
| 8125775 | C6orf125       | -1.74 | down | chromosome 6 open reading frame 125                        |
| 7958253 | OCC-1          | -1.77 | down | overexpressed in colon carcinoma-1                         |
| 8169541 | DOCK11         | -1.78 | down | dedicator of cytokinesis 11                                |
| 7912198 | ENO1           | -1.79 | down | enolase 1, (alpha)                                         |
| 7915286 | PPT1           | -1.80 | down | palmitoyl-protein thioesterase 1 (ceroid-lipofuscinosis, n |
| 8108217 | TGFBI          | -1.80 | down | transforming growth factor, beta-induced, 68kDa            |
| 7996934 | NIP7           | -1.81 | down | nuclear import 7 homolog ( <i>S. cerevisiae</i> )          |

Supplemental Table 2d  
eMSCPCOS vs. eMSCCtrl

|         |                  |       |      |                                                                  |
|---------|------------------|-------|------|------------------------------------------------------------------|
| 8171802 | ACOT9            | -1.81 | down | acyl-CoA thioesterase 9                                          |
| 8102643 | CCNA2            | -1.82 | down | cyclin A2                                                        |
| 8165642 | TMEM203          | -1.83 | down | transmembrane protein 203                                        |
| 7929334 | CEP55            | -1.83 | down | centrosomal protein 55kDa                                        |
| 8155268 | POLR1E           | -1.83 | down | polymerase (RNA) I polypeptide E, 53kDa                          |
| 8170992 | SNORA56          | -1.84 | down | small nucleolar RNA, H/ACA box 56                                |
| 8105348 | LOC493869        | -1.87 | down | similar to RIKEN cDNA 2310016C16                                 |
| 8019857 | NDC80            | -1.90 | down |                                                                  |
| 8041383 | LTBP1            | -1.95 | down | latent transforming growth factor beta binding protein 1         |
| 7981951 | SNRPN SNORD116-2 | -1.95 | down | small nuclear ribonucleoprotein polypeptide N   small n          |
| 7965855 | NUP37            | -2.01 | down | nucleoporin 37kDa                                                |
| 7971541 | SUCLA2           | -2.02 | down | succinate-CoA ligase, ADP-forming, beta subunit                  |
| 8006812 | PSMB3            | -2.03 | down | proteasome (prosome, macropain) subunit, beta type, 3            |
| 8116724 | FARS2            | -2.03 | down | phenylalanyl-tRNA synthetase 2, mitochondrial                    |
| 8149955 | PBK              | -2.03 | down | PDZ binding kinase                                               |
| 8095303 | LPHN3            | -2.03 | down | latrophilin 3                                                    |
| 8138834 | FKBP14           | -2.03 | down | FK506 binding protein 14, 22 kDa                                 |
| 8102560 | MAD2L1           | -2.03 | down | MAD2 mitotic arrest deficient-like 1 (yeast)                     |
| 8130129 | NUP43            | -2.04 | down | nucleoporin 43kDa                                                |
| 8172204 | MAOB             | -2.05 | down | monoamine oxidase B                                              |
| 7923426 | UBE2T            | -2.05 | down | ubiquitin-conjugating enzyme E2T (putative)                      |
| 7962058 | TMTC1            | -2.06 | down | transmembrane and tetratricopeptide repeat containing            |
| 8149551 | PSD3             | -2.06 | down | pleckstrin and Sec7 domain containing 3                          |
| 7989647 | KIAA0101         | -2.07 | down |                                                                  |
| 8113800 | FBN2             | -2.08 | down | fibrillin 2 (congenital contractural arachnodactyly)             |
| 8088979 | VGLL3            | -2.09 | down | vestigial like 3 (Drosophila)                                    |
| 8045688 | TNFAIP6          | -2.09 | down | tumor necrosis factor, alpha-induced protein 6                   |
| 8140840 | STEAP4           | -2.10 | down | STEAP family member 4                                            |
| 8152617 | HAS2             | -2.11 | down | hyaluronan synthase 2                                            |
| 7916570 | OMA1 DAB1        | -2.11 | down | OMA1 homolog, zinc metallopeptidase ( <i>S. cerevisiae</i> )   c |
| 8099807 | GFAF3            | -2.11 | down | FGF-2 activity-associated protein 3                              |
| 8175177 | MBNL3            | -2.12 | down | muscleblind-like 3 (Drosophila)                                  |
| 7951178 | TRPC6            | -2.13 | down | transient receptor potential cation channel, subfamily C,        |

Supplemental Table 2d  
eMSCPCOS vs. eMSCCtrl

|         |                    |       |      |                                                                                               |
|---------|--------------------|-------|------|-----------------------------------------------------------------------------------------------|
| 8107850 | CHSY3              | -2.15 | down | chondroitin sulfate synthase 3                                                                |
| 8085145 | RAD18              | -2.17 | down |                                                                                               |
| 8083968 | NLGN1              | -2.23 | down | neuroligin 1                                                                                  |
| 7903214 | LPPR4              | -2.23 | down | plasticity related gene 1                                                                     |
| 8020898 | ZNF271             | -2.25 | down | zinc finger protein 271                                                                       |
| 7950810 | SYTL2              | -2.26 | down | synaptotagmin-like 2                                                                          |
| 7970467 | N6AMT2             | -2.27 | down | N-6 adenine-specific DNA methyltransferase 2 (putative)                                       |
| 8127201 | COL21A1            | -2.31 | down | collagen, type XXI, alpha 1                                                                   |
| 8023191 | SMAD2              | -2.31 | down | SMAD family member 2                                                                          |
| 8167163 | CXorf24            | -2.34 | down | chromosome X open reading frame 24                                                            |
| 8077323 | CNTN4              | -2.35 | down | contactin 4                                                                                   |
| 7945991 | OR51E2             | -2.37 | down | olfactory receptor, family 51, subfamily E, member 2                                          |
| 7954293 | PDE3A              | -2.37 | down | phosphodiesterase 3A, cGMP-inhibited                                                          |
| 8171248 | KAL1               | -2.38 | down | Kallmann syndrome 1 sequence                                                                  |
| 8112980 | EDIL3              | -2.43 | down | EGF-like repeats and discoidin I-like domains 3                                               |
| 8083779 | SERPINI1           | -2.48 | down | serpin peptidase inhibitor, clade I (neuroserpin), member 1                                   |
| 7981960 | SNRPN SNORD116-6   | -2.56 | down | small nuclear ribonucleoprotein polypeptide N   small nuclear ribonucleoprotein polypeptide N |
| 8091799 | 3orf57 LOC10012928 | -2.63 | down | chromosome 3 open reading frame 57   hypothetical protein LOC10012928                         |
| 8007420 | AOC3               | -2.65 | down | amine oxidase, copper containing 3 (vascular adhesion protein 3)                              |
| 7944082 | TAGLN              | -2.65 | down | transgelin                                                                                    |
| 7986394 | LRRRC28            | -2.67 | down | leucine rich repeat containing 28                                                             |
| 8146957 | PI15               | -2.79 | down | peptidase inhibitor 15                                                                        |
| 8125919 | FKBP5 LOC285847    | -2.88 | down | FK506 binding protein 5   hypothetical protein LOC285847                                      |
| 7976812 | SNORD113-4         | -3.03 | down | small nucleolar RNA, C/D box 113-4                                                            |
| 8042788 | ACTG2              | -3.12 | down | actin, gamma 2, smooth muscle, enteric                                                        |
